# Supplementary material
Source: PubMed Central journal article supplement (PMC2689761)

## Supplementary Data

**Figure S1** – Tris/Tricine SDS-PAGE analysis of CB elastase digests over 48h. A total amount of 7.5  $\mu$ g CB membranes were loaded onto each lane prior to ,6h, 12h, 24h and 48h after elastase was added. The prominent elastase band at approximately 25 kDa height is labelled. The Tris/Tricine gel electrophoresis was performed after the protocol of H. Schägger [Tricine SDS-PAGE (2006). *Nat. Prot.*, 1, 16-22.]

**Figure S2** – Reproducibility of three PM elastase digests in 60% methanol. **(A)** spectra of three individual digests corresponding to 25 ng of protein sample each (approx. 1 pmol BR). **(B)** PMF match to BR sequence of the displayed spectra. Minimum S/N ratio set to 20. Peaks matched within 10 ppm. If multiple peptides match to single masses, manual selection based on nLC-MS/MS data was done. **(C)** Chart showing proportions of peptides present in one, two or all of the three replicates.

**Figure S3** – nLC-MALDI-MS/MS BR sequence coverage display of tryptic digests. Identified peptide locations indicated by thin bars underneath the protein sequence. **(A)** regular KR specificity defined during MASCOT™ search. **(B)** search without enzyme definition.

**Figure S4** – Accuracy dependent PMF matching of 81 MS/MS verified BR AVLIST peptides to BR and two comparable-size false positive protein sequences (Q1LZA1 and P06030). **(A)** specificity considered, only AVLIST cleavages allowed. **(B)** specificity completely ignored, allowing all peptides.

Figure S1

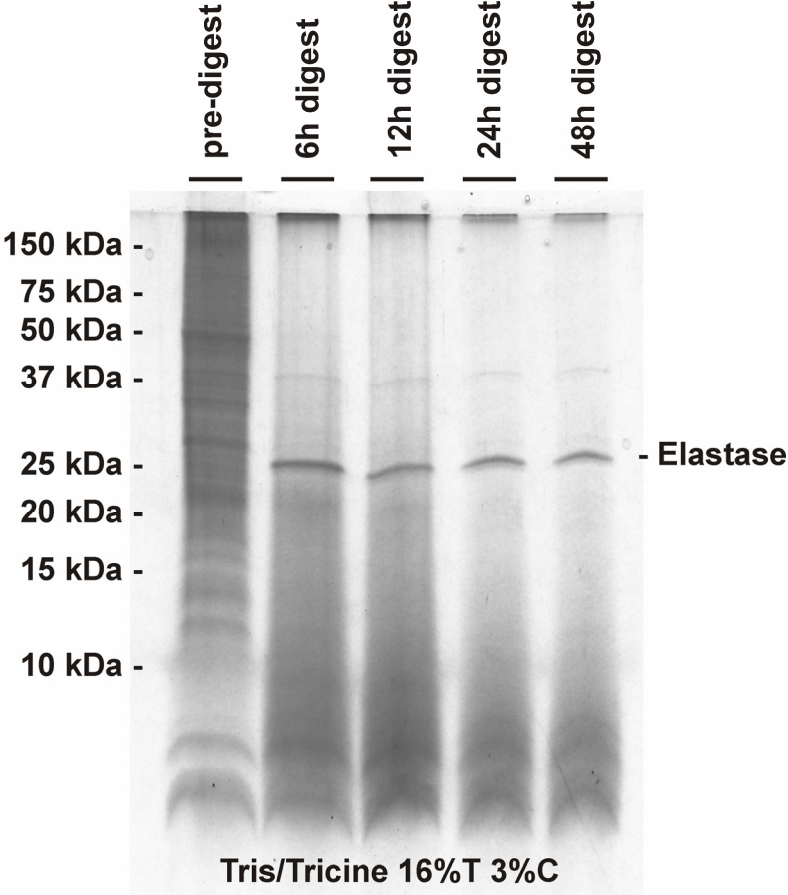

Figure S2

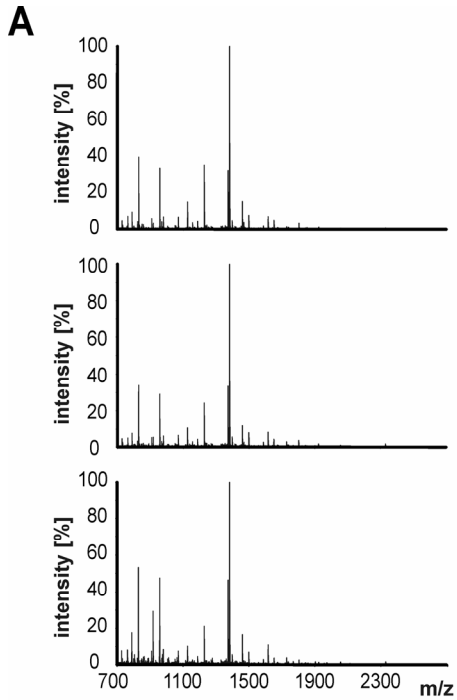

**B**

|            |            |             |            |            |            |
|------------|------------|-------------|------------|------------|------------|
| 10         | 20         | 30          | 40         | 50         | 60         |
| QAQITGRPEW | IWLALGTALM | GLGTLVFLVK  | GMGVSDDPAK | KFYAITTLVP | AIAFTMYLSM |
| 70         | 80         | 90          | 100        | 110        | 120        |
| LLGYGLMVP  | FGGEQNPIYW | ARYADWLETT  | PLLLLDLALL | VDADQGTILA | LVGADGIMIG |
| 130        | 140        | 150         | 160        | 170        | 180        |
| TGLVGALTRV | YSYRFVWAI  | STAMLYILY   | VLFEGFTSKA | ESMRPEVAST | FKVLRNVTVV |
| 190        | 200        | 210         | 220        | 230        | 240        |
| LWSAYPVVWL | IGSEGAGIVP | LNIETLLEFMV | LDVSAKVGFG | LILLRSRAIF | GEAEAPEPSA |
| 250        |            |             |            |            |            |
| GDGAAATSD  |            |             |            |            |            |

  

|            |            |             |            |            |            |
|------------|------------|-------------|------------|------------|------------|
| 10         | 20         | 30          | 40         | 50         | 60         |
| QAQITGRPEW | IWLALGTALM | GLGTLVFLVK  | GMGVSDDPAK | KFYAITTLVP | AIAFTMYLSM |
| 70         | 80         | 90          | 100        | 110        | 120        |
| LLGYGLMVP  | FGGEQNPIYW | ARYADWLETT  | PLLLLDLALL | VDADQGTILA | LVGADGIMIG |
| 130        | 140        | 150         | 160        | 170        | 180        |
| TGLVGALTRV | YSYRFVWAI  | STAMLYILY   | VLFEGFTSKA | ESMRPEVAST | FKVLRNVTVV |
| 190        | 200        | 210         | 220        | 230        | 240        |
| LWSAYPVVWL | IGSEGAGIVP | LNIETLLEFMV | LDVSAKVGFG | LILLRSRAIF | GEAEAPEPSA |
| 250        |            |             |            |            |            |
| GDGAAATSD  |            |             |            |            |            |

  

|            |            |             |            |            |            |
|------------|------------|-------------|------------|------------|------------|
| 10         | 20         | 30          | 40         | 50         | 60         |
| QAQITGRPEW | IWLALGTALM | GLGTLVFLVK  | GMGVSDDPAK | KFYAITTLVP | AIAFTMYLSM |
| 70         | 80         | 90          | 100        | 110        | 120        |
| LLGYGLMVP  | FGGEQNPIYW | ARYADWLETT  | PLLLLDLALL | VDADQGTILA | LVGADGIMIG |
| 130        | 140        | 150         | 160        | 170        | 180        |
| TGLVGALTRV | YSYRFVWAI  | STAMLYILY   | VLFEGFTSKA | ESMRPEVAST | FKVLRNVTVV |
| 190        | 200        | 210         | 220        | 230        | 240        |
| LWSAYPVVWL | IGSEGAGIVP | LNIETLLEFMV | LDVSAKVGFG | LILLRSRAIF | GEAEAPEPSA |
| 250        |            |             |            |            |            |
| GDGAAATSD  |            |             |            |            |            |

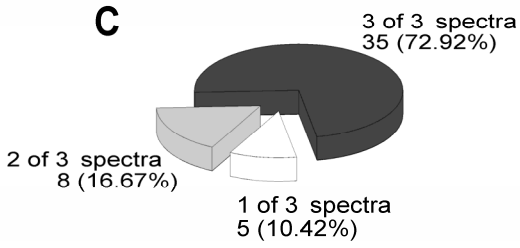

Figure S3

**A**

nLC-MALDI-MS/MS KR specificity

|            |            |             |            |            |            |
|------------|------------|-------------|------------|------------|------------|
| 10         | 20         | 30          | 40         | 50         | 60         |
| QAQITGRPEW | IWLALGTALM | GLGTYLFLVK  | GMGVSDPDAK | KFYAITTLVP | AIAFTMYLSM |
| 70         | 80         | 90          | 100        | 110        | 120        |
| LLGYGLTMVP | FGGEQNPIYW | ARYADWLFTT  | PLLLLDLALL | VDADQGTILA | LVGADGIMIG |
| 130        | 140        | 150         | 160        | 170        | 180        |
| TGLVGALTKV | YSYRFVWAI  | STAAMLYILY  | VLFFGFTSKA | ESMRPEVAST | FKVLRNVTVV |
| 190        | 200        | 210         | 220        | 230        | 240        |
| LWSAYPVVWL | IGSEGAGIVP | LNIEITLLFMV | LDVSAKVGFG | LILRSRAIF  | GEAEPEPSA  |
| 250        |            |             |            |            |            |
| GDGAAATSD  |            |             |            |            |            |

**B**

nLC-MALDI-MS/MS no specificity

|            |            |             |            |            |            |
|------------|------------|-------------|------------|------------|------------|
| 10         | 20         | 30          | 40         | 50         | 60         |
| QAQITGRPEW | IWLALGTALM | GLGTYLFLVK  | GMGVSDPDAK | KFYAITTLVP | AIAFTMYLSM |
| 70         | 80         | 90          | 100        | 110        | 120        |
| LLGYGLTMVP | FGGEQNPIYW | ARYADWLFTT  | PLLLLDLALL | VDADQGTILA | LVGADGIMIG |
| 130        | 140        | 150         | 160        | 170        | 180        |
| TGLVGALTKV | YSYRFVWAI  | STAAMLYILY  | VLFFGFTSKA | ESMRPEVAST | FKVLRNVTVV |
| 190        | 200        | 210         | 220        | 230        | 240        |
| LWSAYPVVWL | IGSEGAGIVP | LNIEITLLFMV | LDVSAKVGFG | LILRSRAIF  | GEAEPEPSA  |
| 250        |            |             |            |            |            |
| GDGAAATSD  |            |             |            |            |            |

Figure S4

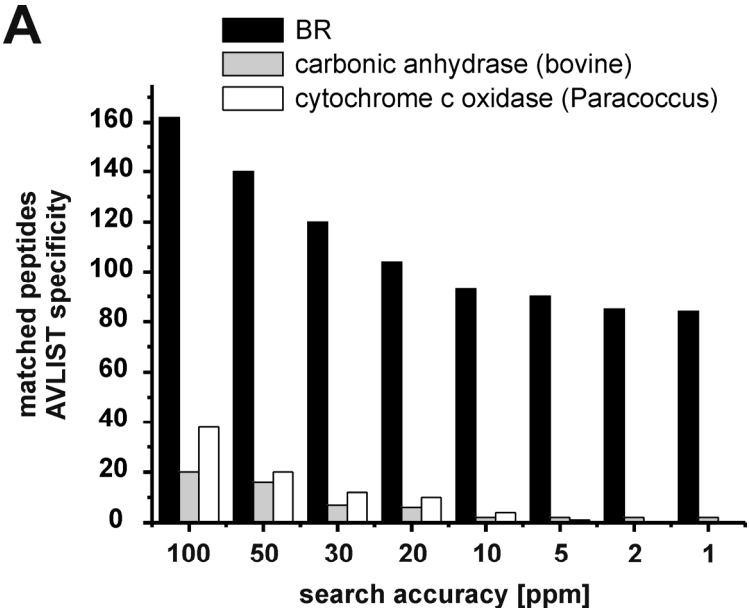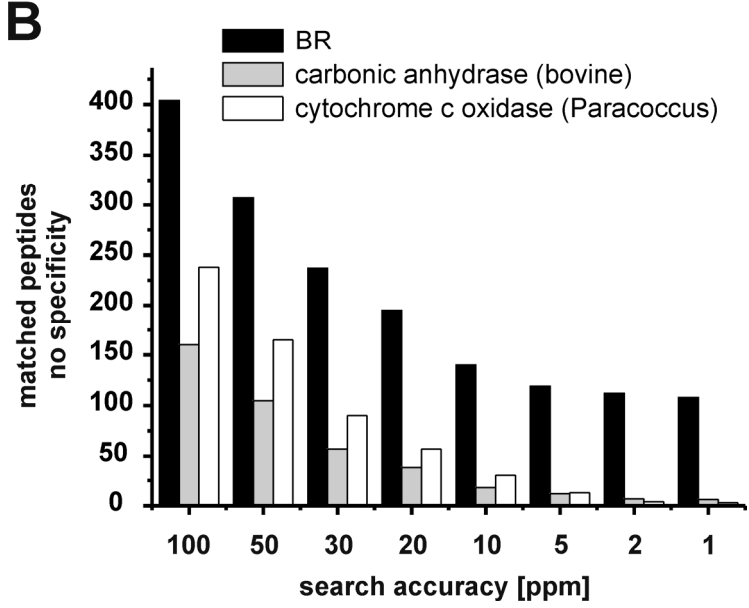

Supplement: M800223-MCP200_1.pdf [file M800223-MCP200_1.pdf]
