# Supplementary material
Source: PubMed Central journal article supplement (PMC2689761)
Supplement: M800223-MCP200_2.pdf [file M800223-MCP200_2.pdf]

## Supplementary Table 1

(this table contains all original peptides data, used to calculate most statistics throughout this study)

| <b>content:</b>                                                                                          | <b>page</b>                       |
|----------------------------------------------------------------------------------------------------------|-----------------------------------|
| <b>I. Corynebacterium glutamicum membrane; elastase digest, nLC-ESI MS/MS, no search specificity</b>     | <b>2</b>                          |
| <b>II. Purple membrane; elastase digest, nLC-ESI MS/MS, no search specificity</b>                        | <b>72</b>                         |
| <b>III. Corynebacterium glutamicum membrane; elastase digest; nLC-MALDI MS/MS; no search specificity</b> | <b>114</b>                        |
| <b>IV. Purple membrane; elastase digest, nLC-MALDI MS/MS; no search specificity</b>                      | <b>151</b>                        |
| <b>V. Purple membrane; elastase digest; nLC-MALDI MS/MS; AVLISTG search specificity</b>                  | <b>168</b>                        |
| <b>VI. Purple membrane; elastase digest; nLC-MALDI MS/MS; AVLIST search specificity</b>                  | <b>181</b>                        |
| <b>VII. Purple membrane; elastase digest; nLC-MALDI MS/MS; AVLI search specificity</b>                   | <b>194</b>                        |
| <b>VIII. Purple membrane; trypsin digest; nLC-MALDI MS/MS; KR search specificity</b>                     | <b>203</b>                        |
| <b>IX. Purple membrane; trypsin digest; nLC-MALDI MS/MS; no search specificity</b>                       | <b>210</b>                        |
| <b>descriptions:</b>                                                                                     |                                   |
| <b>hit</b>                                                                                               | MASCOT protein hit no.            |
| <b>accession</b>                                                                                         | database accession no.            |
| <b>z</b>                                                                                                 | peptide charge                    |
| <b>mass</b>                                                                                              | peptide calculated mass [Da]      |
| <b>ppm</b>                                                                                               | peptide accuracy [ppm]            |
| <b>start</b>                                                                                             | peptide start in protein sequence |
| <b>end</b>                                                                                               | peptide end in protein sequence   |
| <b>mc</b>                                                                                                | no. of missed cleavages           |
| <b>score</b>                                                                                             | peptide MS/MS ions score          |
| <b>id</b>                                                                                                | peptide identity threshold score  |
| <b>-</b>                                                                                                 | residue before peptide sequence   |
| <b>sequence</b>                                                                                          | peptide sequence                  |
| <b>+</b>                                                                                                 | residue after peptide sequence    |
| <b>gravy</b>                                                                                             | peptide GRAVY score               |
| <b>pl</b>                                                                                                | peptide isoelectric point         |
| <b>modification</b>                                                                                      | peptide modification              |

| hit                                                                                                  | accession | z | mass     | ppm  | start | end | mc | score | id | - | sequence  | + | gravy | pl   | modification  |
|------------------------------------------------------------------------------------------------------|-----------|---|----------|------|-------|-----|----|-------|----|---|-----------|---|-------|------|---------------|
| <b>I. Corynebacterium glutamicum membrane; elastase digest, nLC-ESI MS/MS, no search specificity</b> |           |   |          |      |       |     |    |       |    |   |           |   |       |      |               |
| 1                                                                                                    | Cg1537    | 1 | 553.3839 | 1.1  | 307   | 311 | 0  | 26.4  | 24 | S | IVIPL     | L | 3.1   | 6.02 |               |
| 1                                                                                                    | Cg1537    | 1 | 580.3584 | 1.0  | 235   | 240 | 0  | 28.6  | 18 | F | PPLIAA    | I | 1.5   | 6.02 |               |
| 1                                                                                                    | Cg1537    | 1 | 595.304  | 1.7  | 455   | 459 | 0  | 28.5  | 28 | V | SMFLV     | L | 2.4   | 6.02 |               |
| 1                                                                                                    | Cg1537    | 1 | 601.3873 | 0.3  | 268   | 272 | 0  | 27.5  | 16 | S | LLIMI     | P | 3.7   | 6.02 |               |
| 1                                                                                                    | Cg1537    | 1 | 605.3061 | 1.2  | 204   | 208 | 0  | 29.0  | 27 | L | TPEFL     | A | 0.2   | 3.3  |               |
| 1                                                                                                    | Cg1537    | 1 | 621.356  | 0.8  | 456   | 460 | 0  | 26.1  | 19 | S | MFLVL     | A | 3.3   | 6.02 |               |
| 1                                                                                                    | Cg1537    | 1 | 640.416  | 2.0  | 306   | 311 | 0  | 31.4  | 23 | L | SIVIPL    | L | 2.4   | 6.02 |               |
| 1                                                                                                    | Cg1537    | 1 | 642.3588 | 0.9  | 533   | 538 | 0  | 36.6  | 27 | V | DIVSPL    | E | 1.1   | 3.1  |               |
| 1                                                                                                    | Cg1537    | 1 | 654.4064 | -0.3 | 557   | 563 | 0  | 27.2  | 23 | G | KLGP6IA   | I | 0.5   | 10.1 |               |
| 1                                                                                                    | Cg1537    | 1 | 656.3897 | 0.8  | 234   | 239 | 0  | 29.4  | 20 | V | FPPLIA    | A | 1.6   | 6.02 |               |
| 1                                                                                                    | Cg1537    | 1 | 676.416  | 1.2  | 392   | 397 | 0  | 40.4  | 25 | S | LYGVLL    | R | 2.3   | 5.92 |               |
| 1                                                                                                    | Cg1537    | 1 | 684.4211 | -0.9 | 314   | 319 | 0  | 41.8  | 22 | Y | PFLVPL    | G | 1.9   | 6.02 |               |
| 1                                                                                                    | Cg1537    | 1 | 693.4425 | 0.6  | 235   | 241 | 0  | 27.8  | 20 | F | PPLIAAI   | G | 1.9   | 6.02 |               |
| 1                                                                                                    | Cg1537    | 1 | 701.3596 | -0.7 | 528   | 534 | 0  | 39.8  | 32 | A | AGEVVDI   | V | 1.0   | 3    |               |
| 1                                                                                                    | Cg1537    | 1 | 726.3225 | -1.7 | 634   | 639 | 0  | 42.1  | 24 | T | FDADFI    | R | 0.8   | 2.92 |               |
| 1                                                                                                    | Cg1537    | 1 | 727.3865 | -1.0 | 568   | 575 | 0  | 37.0  | 28 | T | GNTVVAPA  | D | 0.7   | 6.02 |               |
| 1                                                                                                    | Cg1537    | 1 | 730.4047 | -2.1 | 328   | 333 | 0  | 32.7  | 28 | A | IMIQNI    | N | 1.4   | 6.02 |               |
| 1                                                                                                    | Cg1537    | 1 | 739.3865 | 0.3  | 602   | 608 | 0  | 40.2  | 26 | V | HVGLDTV   | Q | 0.6   | 4.94 |               |
| 1                                                                                                    | Cg1537    | 1 | 742.369  | 1.3  | 262   | 267 | 0  | 25.9  | 24 | V | FVPFFS    | L | 1.7   | 6.02 |               |
| 1                                                                                                    | Cg1537    | 1 | 745.401  | 0.4  | 205   | 211 | 0  | 35.7  | 28 | T | PEFLALG   | S | 1.0   | 3.3  |               |
| 1                                                                                                    | Cg1537    | 1 | 746.3996 | 1.2  | 328   | 333 | 0  | 35.0  | 29 | A | IMIQNI    | N | 1.4   | 6.02 | Oxidation (M) |
| 1                                                                                                    | Cg1537    | 1 | 755.3701 | -0.4 | 546   | 552 | 0  | 46.0  | 22 | L | SEVPDPI   | F | -0.3  | 3    |               |
| 1                                                                                                    | Cg1537    | 1 | 758.4174 | -0.9 | 291   | 297 | 0  | 35.5  | 32 | I | SNLLEAI   | N | 0.9   | 3.3  |               |
| 1                                                                                                    | Cg1537    | 1 | 769.4772 | -2.3 | 268   | 274 | 0  | 19.2  | 17 | S | LLIMIPA   | T | 2.7   | 6.02 |               |
| 1                                                                                                    | Cg1537    | 2 | 782.465  | 1.0  | 555   | 563 | 0  | 29.8  | 26 | A | AGKLG6IA  | I | 0.6   | 10.1 |               |
| 1                                                                                                    | Cg1537    | 1 | 798.4316 | -0.3 | 173   | 178 | 0  | 36.0  | 25 | V | FYFLPI    | M | 1.8   | 5.92 |               |
| 1                                                                                                    | Cg1537    | 1 | 816.3766 | -0.1 | 189   | 196 | 0  | 34.9  | 27 | L | GANEWIGA  | A | -0.1  | 3.3  |               |
| 1                                                                                                    | Cg1537    | 1 | 827.3701 | 0.4  | 633   | 639 | 0  | 25.9  | 24 | I | TFDADFI   | R | 0.6   | 2.92 |               |
| 1                                                                                                    | Cg1537    | 1 | 828.3654 | 0.6  | 74    | 79  | 0  | 34.9  | 25 | A | NYQEI     | L | -1.4  | 3.3  |               |
| 1                                                                                                    | Cg1537    | 1 | 828.4229 | -0.2 | 533   | 540 | 0  | 29.4  | 27 | V | DIVSPLEG  | K | 0.3   | 3    |               |
| 1                                                                                                    | Cg1537    | 1 | 831.4742 | 0.0  | 202   | 208 | 0  | 30.4  | 28 | A | LLTPEFL   | A | 1.2   | 3.3  |               |
| 1                                                                                                    | Cg1537    | 1 | 832.4331 | -2.6 | 205   | 212 | 0  | 35.8  | 30 | T | PEFLALGS  | A | 0.7   | 3.3  |               |
| 1                                                                                                    | Cg1537    | 1 | 835.4844 | -1.4 | 264   | 270 | 0  | 25.9  | 22 | V | PFFSLLI   | M | 2.2   | 6.02 |               |
| 1                                                                                                    | Cg1537    | 1 | 838.4549 | 0.1  | 601   | 608 | 0  | 59.2  | 27 | L | VHVGLDTV  | Q | 1.1   | 4.94 |               |
| 1                                                                                                    | Cg1537    | 1 | 854.4862 | -0.4 | 53    | 61  | 0  | 44.1  | 26 | S | VLGVVPQGS | T | 1.1   | 6.02 |               |
| 1                                                                                                    | Cg1537    | 2 | 862.4953 | 0.0  | 277   | 284 | 0  | 34.5  | 27 | A | FLLGPFGI  | G | 1.9   | 6.02 |               |
| 1                                                                                                    | Cg1537    | 1 | 866.5113 | -2.0 | 643   | 650 | 0  | 29.7  | 20 | K | DLPLITPV  | V | 1.1   | 3.1  |               |

| hit | accession | z | mass      | ppm  | start | end | mc | score | id | - | sequence      | + | gravy | pl    | modification  |
|-----|-----------|---|-----------|------|-------|-----|----|-------|----|---|---------------|---|-------|-------|---------------|
| 1   | Cg1537    | 2 | 902.5113  | 1.0  | 201   | 208 | 0  | 54.6  | 25 | A | ALLTPEFL      | A | 1.3   | 3.3   |               |
| 1   | Cg1537    | 1 | 903.4014  | -0.4 | 113   | 119 | 0  | 38.2  | 26 | I | DYAFEFL       | S | 0.4   | 3     |               |
| 1   | Cg1537    | 1 | 933.5324  | 0.1  | 276   | 284 | 0  | 29.1  | 27 | T | AFLLGPFGI     | G | 1.9   | 6.02  |               |
| 1   | Cg1537    | 1 | 941.4494  | 1.0  | 334   | 341 | 0  | 42.7  | 25 | I | NTLGYDFI      | Q | 0.2   | 3.1   |               |
| 1   | Cg1537    | 1 | 950.4862  | -1.4 | 242   | 249 | 0  | 34.1  | 29 | I | GLYWVEKG      | L | -0.3  | 6.86  |               |
| 1   | Cg1537    | 1 | 950.4862  | 0.0  | 297   | 304 | 0  | 33.0  | 29 | A | INNFSPFI      | L | 0.7   | 6.02  |               |
| 1   | Cg1537    | 1 | 951.539   | -2.3 | 600   | 608 | 0  | 43.7  | 23 | I | LVHVLDTV      | Q | 1.4   | 4.94  |               |
| 1   | Cg1537    | 2 | 960.5684  | 1.6  | 312   | 319 | 0  | 24.9  | 18 | L | LYPFLVPL      | G | 1.7   | 5.92  |               |
| 1   | Cg1537    | 1 | 965.5546  | -0.5 | 558   | 567 | 0  | 42.7  | 24 | K | LGPGLAIQPT    | G | 0.6   | 6.02  |               |
| 1   | Cg1537    | 2 | 973.5484  | 1.5  | 201   | 209 | 0  | 26.8  | 25 | A | ALLTPEFLA     | L | 1.3   | 3.3   |               |
| 1   | Cg1537    | 1 | 975.5463  | -1.8 | 218   | 226 | 0  | 31.2  | 24 | V | TVFGLPMVL     | N | 2.0   | 6.02  |               |
| 1   | Cg1537    | 1 | 991.5413  | -1.4 | 218   | 226 | 0  | 35.1  | 24 | V | TVFGLPMVL     | N | 2.0   | 6.02  | Oxidation (M) |
| 1   | Cg1537    | 2 | 994.6063  | -0.8 | 642   | 650 | 0  | 25.4  | 21 | S | KDLPLITPV     | V | 0.6   | 6.76  |               |
| 1   | Cg1537    | 1 | 1000.5553 | -1.1 | 592   | 600 | 0  | 33.2  | 29 | L | RLDSGVEIL     | V | 0.4   | 4.08  |               |
| 1   | Cg1537    | 1 | 1000.5706 | -0.3 | 553   | 563 | 0  | 38.0  | 28 | I | FAAGKLGPGIA   | I | 0.9   | 10.1  |               |
| 1   | Cg1537    | 1 | 1009.6535 | -1.0 | 250   | 258 | 0  | 32.8  | 21 | G | LKKIPEAV      | Q | 0.7   | 9.88  |               |
| 1   | Cg1537    | 2 | 1018.5852 | 0.6  | 277   | 286 | 0  | 61.6  | 26 | A | FLLGPFGLGIV   | G | 1.9   | 6.02  |               |
| 1   | Cg1537    | 1 | 1019.5552 | -2.7 | 320   | 328 | 0  | 32.2  | 27 | L | GLHWPLNAI     | M | 0.5   | 7.84  |               |
| 1   | Cg1537    | 1 | 1023.5964 | -1.4 | 536   | 545 | 0  | 34.4  | 23 | V | SPLEGKAIPL    | S | 0.2   | 6.94  |               |
| 1   | Cg1537    | 1 | 1034.488  | -1.2 | 667   | 676 | 0  | 30.5  | 27 | A | DQANSSTTVI    | K | -0.3  | 3.1   |               |
| 1   | Cg1537    | 1 | 1034.5801 | -2.3 | 275   | 284 | 0  | 37.1  | 26 | A | TAFLLGPFGI    | G | 1.6   | 6.02  |               |
| 1   | Cg1537    | 1 | 1044.4916 | -1.5 | 108   | 115 | 0  | 29.7  | 27 | G | KYSWIDYA      | F | -0.7  | 6.62  |               |
| 1   | Cg1537    | 1 | 1059.56   | -0.3 | 657   | 666 | 0  | 47.2  | 30 | A | KFGEIEGIPA    | D | 0.0   | 4.26  |               |
| 1   | Cg1537    | 1 | 1063.5702 | 0.8  | 297   | 305 | 0  | 39.3  | 28 | A | INNFSPFIL     | S | 1.0   | 6.02  |               |
| 1   | Cg1537    | 1 | 1081.6212 | -1.0 | 262   | 270 | 0  | 24.5  | 24 | V | FVPFFSLLI     | M | 2.5   | 6.02  |               |
| 1   | Cg1537    | 1 | 1089.6223 | -1.7 | 276   | 286 | 0  | 31.7  | 26 | T | AFLLGPFGLGIV  | G | 1.9   | 6.02  |               |
| 1   | Cg1537    | 1 | 1093.6495 | -0.6 | 557   | 567 | 0  | 54.4  | 21 | G | KLGPGLAIQPT   | G | 0.2   | 10.1  |               |
| 1   | Cg1537    | 1 | 1094.5107 | -0.5 | 438   | 446 | 0  | 29.5  | 28 | A | MDPWLGYTI     | G | 0.2   | 3.1   |               |
| 1   | Cg1537    | 1 | 1097.5142 | -2.6 | 144   | 152 | 0  | 28.9  | 27 | A | DTFGLQDFR     | A | -0.7  | 3.88  |               |
| 1   | Cg1537    | 1 | 1097.5968 | -2.4 | 528   | 538 | 0  | 39.0  | 27 | A | AGEVVDIVSPL   | E | 1.2   | 3     |               |
| 1   | Cg1537    | 1 | 1099.6026 | -0.5 | 279   | 290 | 0  | 40.3  | 28 | L | LGPFGIVGNGI   | S | 1.1   | 6.02  |               |
| 1   | Cg1537    | 1 | 1100.5365 | 0.0  | 259   | 267 | 0  | 37.2  | 28 | V | QMVVFPFFS     | L | 1.4   | 6.02  |               |
| 1   | Cg1537    | 1 | 1122.6648 | -2.3 | 535   | 545 | 0  | 22.8  | 21 | I | VSPLEGKAIPL   | S | 0.6   | 6.94  |               |
| 1   | Cg1537    | 2 | 1150.671  | -0.3 | 556   | 567 | 0  | 36.9  | 23 | A | GKLGPGIAIQPT  | G | 0.2   | 10.1  |               |
| 1   | Cg1537    | 1 | 1154.5067 | -2.9 | 337   | 347 | 0  | 42.4  | 23 | L | GYDFIQGPMGA   | W | 0.0   | 3.1   |               |
| 1   | Cg1537    | 1 | 1170.7053 | -0.9 | 310   | 319 | 0  | 25.8  | 25 | I | PLLYPFLVPL    | G | 1.6   | 5.92  |               |
| 1   | Cg1537    | 1 | 1189.6496 | -1.8 | 277   | 288 | 0  | 28.5  | 28 | A | FLLGPFGLGIVGN | G | 1.3   | 6.02  |               |
| 1   | Cg1537    | 1 | 1190.67   | 0.9  | 275   | 286 | 0  | 32.0  | 27 | A | TAFLLGPFGLGIV | G | 1.7   | 6.02  |               |
| 1   | Cg1537    | 2 | 1213.6567 | 0.2  | 186   | 196 | 0  | 43.7  | 28 | A | RKLGANEWIGA   | A | -0.5  | 10.08 |               |
| 1   | Cg1537    | 2 | 1221.7081 | 0.1  | 555   | 567 | 0  | 52.0  | 22 | A | AGKLGPGIAIQPT | G | 0.3   | 10.1  |               |

| hit | accession | z | mass      | ppm  | start | end | mc | score | id | - | sequence          | + | gravy | pl    | modification  |
|-----|-----------|---|-----------|------|-------|-----|----|-------|----|---|-------------------|---|-------|-------|---------------|
| 1   | Cg1537    | 2 | 1237.7394 | 0.5  | 640   | 650 | 0  | 46.6  | 22 | I | RSKDLPLITPV       | V | 0.0   | 10.08 |               |
| 1   | Cg1537    | 1 | 1257.6388 | -0.2 | 55    | 67  | 0  | 32.8  | 28 | L | GVVPQGSTGMQVV     | M | 0.6   | 6.02  |               |
| 1   | Cg1537    | 1 | 1264.5282 | -3.6 | 153   | 163 | 0  | 27.0  | 22 | R | APMDEQPDYV        | F | -1.0  | 2.88  |               |
| 1   | Cg1537    | 1 | 1264.6162 | -2.5 | 438   | 448 | 0  | 38.7  | 29 | A | MDPWLGYTIGI       | A | 0.5   | 3.1   |               |
| 1   | Cg1537    | 1 | 1275.6347 | -1.6 | 205   | 217 | 0  | 39.6  | 29 | T | PEFLALGSAGDTV     | T | 0.6   | 3     |               |
| 1   | Cg1537    | 2 | 1277.5347 | -0.7 | 83    | 94  | 0  | 31.0  | 22 | L | DGMKHFADGEAT      | E | -0.9  | 4.3   |               |
| 1   | Cg1537    | 1 | 1277.7231 | -4.0 | 541   | 552 | 0  | 55.0  | 25 | G | KAIPLSEVPDPI      | F | 0.2   | 4.08  |               |
| 1   | Cg1537    | 1 | 1283.6609 | -0.5 | 528   | 540 | 0  | 41.3  | 28 | A | AGEVVDIVSPLEG     | K | 0.7   | 2.94  |               |
| 1   | Cg1537    | 2 | 1287.6306 | -0.9 | 478   | 489 | 0  | 46.9  | 29 | V | AADKQAEEDLKA      | E | -1.2  | 4.06  |               |
| 1   | Cg1537    | 1 | 1322.6394 | -2.0 | 628   | 639 | 0  | 54.6  | 28 | A | GDPLITFDADFI      | R | 0.6   | 2.82  |               |
| 1   | Cg1537    | 2 | 1345.6361 | -1.7 | 480   | 491 | 0  | 78.9  | 28 | A | DKQAEEDLKAEA      | N | -1.6  | 3.92  |               |
| 1   | Cg1537    | 1 | 1350.7758 | -4.1 | 533   | 545 | 0  | 47.5  | 23 | V | DIVSPLEGKAIPL     | S | 0.6   | 4.08  |               |
| 1   | Cg1537    | 2 | 1359.7551 | -0.1 | 277   | 290 | 0  | 71.0  | 27 | A | FLLGPFGIGVGNGI    | S | 1.4   | 6.02  |               |
| 1   | Cg1537    | 1 | 1373.6827 | -1.0 | 657   | 669 | 0  | 85.9  | 29 | A | KFGEIEGIPADQA     | N | -0.4  | 3.82  |               |
| 1   | Cg1537    | 1 | 1376.6824 | 0.7  | 204   | 217 | 0  | 50.1  | 29 | L | TPEFLALGSAGDTV    | T | 0.5   | 3     |               |
| 1   | Cg1537    | 1 | 1393.6766 | -0.4 | 627   | 639 | 0  | 52.4  | 28 | K | AGDPLITFDADFI     | R | 0.7   | 2.82  |               |
| 1   | Cg1537    | 1 | 1402.7092 | -2.7 | 653   | 666 | 0  | 35.2  | 29 | V | SNAAKFGEIEGIPA    | D | 0.0   | 4.26  |               |
| 1   | Cg1537    | 2 | 1411.7559 | 1.3  | 528   | 541 | 0  | 45.1  | 27 | A | AGEVVDIVSPLEGK    | A | 0.4   | 3.82  |               |
| 1   | Cg1537    | 1 | 1412.7374 | 0.1  | 431   | 443 | 0  | 47.7  | 28 | T | SLLTIPAMDPWLG     | Y | 0.8   | 3.1   |               |
| 1   | Cg1537    | 2 | 1416.6732 | -1.0 | 479   | 491 | 0  | 68.9  | 28 | A | ADKQAEEDLKAEA     | N | -1.4  | 3.92  |               |
| 1   | Cg1537    | 2 | 1418.7154 | -1.2 | 10    | 22  | 0  | 69.8  | 30 | S | QHILENLGGPDNI     | T | -0.5  | 4.06  |               |
| 1   | Cg1537    | 1 | 1419.7034 | -0.8 | 227   | 239 | 0  | 34.5  | 29 | L | NDYSGQVFPPLIA     | A | 0.1   | 3.1   |               |
| 1   | Cg1537    | 2 | 1439.8136 | -0.6 | 553   | 567 | 0  | 74.1  | 26 | I | FAAGKLGPGIAIQPT   | G | 0.6   | 10.1  |               |
| 1   | Cg1537    | 1 | 1444.7198 | -3.0 | 656   | 669 | 0  | 55.1  | 29 | A | AKFGEIEGIPADQA    | N | -0.2  | 3.82  |               |
| 1   | Cg1537    | 2 | 1464.83   | 0.6  | 557   | 571 | 0  | 37.9  | 25 | G | KLGPGLIAIQPTGNTV  | V | 0.1   | 10.1  |               |
| 1   | Cg1537    | 1 | 1469.7912 | 0.1  | 53    | 67  | 0  | 40.5  | 28 | S | VLGVVPQGSTGMQVV   | M | 1.0   | 6.02  |               |
| 1   | Cg1537    | 1 | 1482.6813 | -1.9 | 334   | 347 | 0  | 51.4  | 27 | I | NTLGYDFIQGPMGA    | W | 0.0   | 3.1   |               |
| 1   | Cg1537    | 2 | 1487.7103 | 0.3  | 478   | 491 | 0  | 53.6  | 28 | V | AADKQAEEDLKAEA    | N | -1.1  | 3.92  |               |
| 1   | Cg1537    | 2 | 1493.6093 | -1.2 | 83    | 96  | 0  | 24.2  | 19 | L | DGMKHFADGEATES    | S | -1.1  | 4.06  |               |
| 1   | Cg1537    | 2 | 1498.6762 | 1.0  | 334   | 347 | 0  | 28.4  | 26 | I | NTLGYDFIQGPMGA    | W | 0.0   | 3.1   | Oxidation (M) |
| 1   | Cg1537    | 1 | 1505.7474 | -2.8 | 9     | 22  | 0  | 89.8  | 30 | T | SQHILENLGGPDNI    | T | -0.5  | 4.06  |               |
| 1   | Cg1537    | 2 | 1519.7631 | -1.3 | 10    | 23  | 0  | 59.0  | 29 | S | QHILENLGGPDNIT    | S | -0.5  | 4.06  |               |
| 1   | Cg1537    | 1 | 1521.7715 | -2.5 | 626   | 639 | 0  | 32.3  | 29 | V | KAGDPLITFDADFI    | R | 0.4   | 3.6   |               |
| 1   | Cg1537    | 1 | 1531.8399 | -2.4 | 275   | 290 | 0  | 49.6  | 28 | A | TAFLLGPFGIGVGNGI  | S | 1.3   | 6.02  |               |
| 1   | Cg1537    | 2 | 1557.8072 | -0.4 | 375   | 391 | 0  | 68.4  | 29 | V | SLGGMLAGLLGGISEPS | L | 0.8   | 3.3   |               |
| 1   | Cg1537    | 1 | 1602.8505 | -2.7 | 202   | 217 | 0  | 32.1  | 29 | A | LLTPEFLALGSAGDTV  | T | 0.9   | 3     |               |
| 1   | Cg1537    | 2 | 1612.9188 | -1.9 | 637   | 650 | 0  | 37.6  | 26 | A | DFIRSKDLPLITPV    | V | 0.3   | 6.9   |               |
| 1   | Cg1537    | 1 | 1629.7998 | -2.9 | 654   | 669 | 0  | 46.7  | 28 | S | NAAKFGEIEGIPADQA  | N | -0.3  | 3.82  |               |
| 1   | Cg1537    | 1 | 1673.8876 | -2.2 | 201   | 217 | 0  | 58.6  | 29 | A | ALLTPEFLALGSAGDTV | T | 0.9   | 3     |               |
| 1   | Cg1537    | 1 | 1690.893  | -2.5 | 291   | 305 | 0  | 47.6  | 29 | I | SNLLEAINNFSPFIL   | S | 0.7   | 3.3   |               |

| hit | accession   | z | mass      | ppm  | start | end | mc | score | id | - | sequence                   | + | gravy | pl    | modification  |
|-----|-------------|---|-----------|------|-------|-----|----|-------|----|---|----------------------------|---|-------|-------|---------------|
| 1   | Cg1537      | 1 | 1716.8318 | -1.9 | 653   | 669 | 0  | 62.2  | 29 | V | SNAAKFGEIEGIPADQA          | N | -0.3  | 3.82  |               |
| 1   | Cg1537      | 2 | 1760.956  | -0.1 | 536   | 552 | 0  | 50.2  | 27 | V | SPLEGKAIPLSEVPDPI          | F | 0.0   | 3.82  |               |
| 1   | Cg1537      | 1 | 1786.9982 | -3.0 | 277   | 294 | 0  | 45.7  | 27 | A | FLLGPFGIGVGNISNLL          | E | 1.3   | 6.02  |               |
| 1   | Cg1537      | 2 | 1803.0254 | -0.6 | 557   | 575 | 0  | 30.9  | 25 | G | KLGPGLAIQPTGNTVVAPA        | D | 0.4   | 10.1  |               |
| 1   | Cg1537      | 1 | 1806.0139 | -2.7 | 528   | 545 | 0  | 91.4  | 25 | A | AGEVVDIVSPLEGKAIPL         | S | 0.8   | 3.82  |               |
| 1   | Cg1537      | 2 | 1831.9428 | -1.3 | 33    | 47  | 0  | 78.6  | 30 | L | RFQVKDQSIVDQQEI            | D | -0.9  | 4.3   |               |
| 1   | Cg1537      | 2 | 1838.8833 | 0.2  | 10    | 26  | 0  | 58.3  | 29 | S | QHILENLGGPDNITSMT          | H | -0.4  | 4.06  |               |
| 1   | Cg1537      | 1 | 1840.0094 | -3.1 | 279   | 297 | 0  | 56.8  | 28 | L | LGPFGIGVGNISNLEAI          | N | 1.0   | 3.3   |               |
| 1   | Cg1537      | 1 | 1859.9492 | -4.2 | 223   | 239 | 0  | 60.2  | 30 | L | PMVLNDYSGQVFPPLIA          | A | 0.5   | 3.1   |               |
| 1   | Cg1537      | 2 | 1860.0244 | -1.5 | 535   | 552 | 0  | 42.1  | 27 | I | VSPLEGKAIPLSEVPDPI         | F | 0.2   | 3.82  |               |
| 1   | Cg1537      | 2 | 1863.885  | -1.6 | 657   | 674 | 0  | 37.8  | 29 | A | KFGEIEGIPADQANSSTT         | V | -0.6  | 3.82  |               |
| 1   | Cg1537      | 1 | 1874.0037 | 0.3  | 201   | 219 | 0  | 63.6  | 28 | A | ALLTPEFLALGSAGDTVTV        | F | 1.0   | 3     |               |
| 1   | Cg1537      | 1 | 1987.0779 | -1.9 | 277   | 296 | 0  | 43.3  | 28 | A | FLLGPFGIGVGNISNLEA         | I | 1.0   | 3.3   |               |
| 1   | Cg1537      | 2 | 2072.0758 | -2.3 | 371   | 391 | 0  | 44.9  | 30 | A | MRQVSLGGMLAGLLGGISEPS      | L | 0.6   | 6.98  |               |
| 1   | Cg1537      | 2 | 2076.0375 | -2.5 | 657   | 676 | 0  | 61.2  | 30 | A | KFGEIEGIPADQANSSTTVI       | K | -0.1  | 3.82  |               |
| 1   | Cg1537      | 2 | 2088.1354 | -2.8 | 533   | 552 | 0  | 35.0  | 28 | V | DIVSPLEGKAIPLSEVPDPI       | F | 0.3   | 3.58  |               |
| 1   | Cg1537      | 2 | 2100.1619 | 0.0  | 277   | 297 | 0  | 35.8  | 28 | A | FLLGPFGIGVGNISNLEAI        | N | 1.2   | 3.3   |               |
| 1   | Cg1537      | 2 | 2147.0746 | -3.7 | 656   | 676 | 0  | 33.6  | 30 | A | AKFGEIEGIPADQANSSTTVI      | K | 0.0   | 3.82  |               |
| 1   | Cg1537      | 2 | 2332.1546 | -2.8 | 654   | 676 | 0  | 69.5  | 30 | S | NAAKFGEIEGIPADQANSSTTVI    | K | -0.1  | 3.82  |               |
| 1   | Cg1537      | 2 | 2344.0318 | -0.7 | 144   | 163 | 0  | 55.5  | 23 | A | DTFGLQDFRAPMDEQPDTYV       | F | -0.9  | 3.36  |               |
| 1   | Cg1537      | 2 | 2419.1867 | -2.9 | 653   | 676 | 0  | 56.0  | 30 | V | SNAAKFGEIEGIPADQANSSTTVI   | K | -0.1  | 3.82  |               |
| 1   | Cg1537      | 2 | 2442.1525 | -3.0 | 74    | 94  | 0  | 69.8  | 28 | A | NYYQEILKLDGMKHFADGEAT      | E | -0.7  | 4.54  |               |
| 1   | Cg1537      | 2 | 2543.3734 | 1.2  | 528   | 552 | 0  | 111.1 | 29 | A | AGEVVDIVSPLEGKAIPLSEVPDPI  | F | 0.5   | 3.5   |               |
| 1   | Cg1537      | 2 | 2604.1843 | -0.4 | 144   | 165 | 0  | 39.9  | 26 | A | DTFGLQDFRAPMDEQPDTYVFL     | H | -0.5  | 3.36  |               |
| 1   | Cg1537      | 2 | 2646.3501 | -2.0 | 653   | 678 | 0  | 34.8  | 31 | V | SNAAKFGEIEGIPADQANSSTTVIKV | N | -0.1  | 4.44  |               |
| 1   | Cg1537      | 2 | 2658.2271 | -1.5 | 74    | 96  | 0  | 52.6  | 27 | A | NYYQEILKLDGMKHFADGEATES    | S | -0.9  | 4.28  |               |
| 1   | Cg1537      | 3 | 2828.2752 | 0.2  | 144   | 167 | 0  | 32.0  | 25 | A | DTFGLQDFRAPMDEQPDTYVFLHS   | M | -0.6  | 3.76  |               |
| 2   | P00772 ELA1 | 1 | 532.2646  | 0.8  | 157   | 161 | 0  | 32.2  | 29 | T | GWGLT                      | R | 0.3   | 6.02  |               |
| 2   | P00772 ELA1 | 1 | 532.2646  | 1.1  | 156   | 160 | 0  | 30.8  | 29 | I | TGWGL                      | T | 0.3   | 6.02  |               |
| 2   | P00772 ELA1 | 1 | 649.2894  | 0.5  | 64    | 68  | 0  | 31.2  | 28 | Q | NWVMT                      | A | 0.2   | 6.02  |               |
| 2   | P00772 ELA1 | 1 | 650.3024  | 0.0  | 223   | 228 | 0  | 29.3  | 25 | V | NGQYAV                     | H | -0.5  | 5.92  |               |
| 2   | P00772 ELA1 | 1 | 665.3384  | 0.6  | 133   | 138 | 0  | 43.8  | 30 | N | SYVQLG                     | V | 0.3   | 5.92  |               |
| 2   | P00772 ELA1 | 2 | 668.397   | -0.1 | 138   | 144 | 0  | 45.2  | 24 | L | GVLPRAG                    | T | 0.4   | 11.04 |               |
| 2   | P00772 ELA1 | 1 | 711.3228  | -0.3 | 189   | 194 | 0  | 27.7  | 21 | S | YWGSTV                     | K | 0.0   | 5.92  |               |
| 2   | P00772 ELA1 | 1 | 720.3265  | 0.6  | 64    | 69  | 0  | 41.7  | 27 | Q | NWVMTA                     | A | 0.5   | 6.02  |               |
| 2   | P00772 ELA1 | 2 | 726.4388  | 1.5  | 140   | 146 | 0  | 30.7  | 25 | V | LPRAGTI                    | L | 0.4   | 11.04 |               |
| 2   | P00772 ELA1 | 1 | 731.3602  | 0.5  | 257   | 262 | 0  | 38.1  | 27 | I | SWINNV                     | I | 0.0   | 6.02  |               |
| 2   | P00772 ELA1 | 1 | 736.3214  | 0.0  | 64    | 69  | 0  | 32.7  | 26 | Q | NWVMTA                     | A | 0.5   | 6.02  | Oxidation (M) |
| 2   | P00772 ELA1 | 1 | 748.3028  | 0.1  | 109   | 114 | 0  | 35.1  | 25 | Y | WNTDDV                     | A | -1.3  | 2.92  |               |
| 2   | P00772 ELA1 | 2 | 772.3868  | 1.2  | 225   | 231 | 0  | 51.4  | 25 | G | QYAVHGV                    | T | 0.3   | 7.76  |               |

| hit | accession   | z | mass      | ppm  | start | end | mc | score | id | - | sequence    | + | gravy | pl    | modification  |
|-----|-------------|---|-----------|------|-------|-----|----|-------|----|---|-------------|---|-------|-------|---------------|
| 2   | P00772 ELA1 | 1 | 779.3814  | 0.3  | 132   | 138 | 0  | 37.6  | 29 | L | NSYVQLG     | V | -0.2  | 5.92  |               |
| 2   | P00772 ELA1 | 1 | 781.481   | -0.8 | 137   | 144 | 0  | 26.5  | 23 | Q | LGVLPFRAG   | T | 0.8   | 11.04 |               |
| 2   | P00772 ELA1 | 1 | 786.3184  | 0.3  | 187   | 193 | 0  | 30.6  | 21 | S | SSYWGST     | V | -0.8  | 5.92  |               |
| 2   | P00772 ELA1 | 2 | 789.4133  | 0.5  | 156   | 162 | 0  | 49.8  | 29 | I | TGWGLTR     | T | -0.5  | 11.04 |               |
| 2   | P00772 ELA1 | 1 | 797.4759  | -0.5 | 141   | 148 | 0  | 31.9  | 25 | L | PRAGTILA    | N | 0.6   | 11.04 |               |
| 2   | P00772 ELA1 | 1 | 807.3255  | -1.4 | 198   | 206 | 0  | 34.3  | 23 | S | MVCAGGDGV   | R | 1.1   | 3.1   |               |
| 2   | P00772 ELA1 | 1 | 819.4127  | -0.2 | 172   | 178 | 0  | 34.9  | 31 | L | QQAYLPT     | V | -0.7  | 5.92  |               |
| 2   | P00772 ELA1 | 2 | 825.5072  | 1.5  | 139   | 146 | 0  | 38.4  | 24 | G | VLPRAGTI    | L | 0.9   | 11.04 |               |
| 2   | P00772 ELA1 | 1 | 828.4494  | 0.2  | 258   | 264 | 0  | 29.5  | 24 | S | WINNVIA     | S | 1.0   | 6.02  |               |
| 2   | P00772 ELA1 | 1 | 830.3923  | -0.7 | 36    | 42  | 0  | 29.0  | 28 | R | NSWPSQI     | S | -0.9  | 6.02  |               |
| 2   | P00772 ELA1 | 1 | 834.4487  | -1.0 | 116   | 123 | 0  | 33.1  | 28 | A | AGYDIALL    | R | 1.3   | 3.1   |               |
| 2   | P00772 ELA1 | 1 | 843.445   | -0.9 | 164   | 171 | 0  | 51.1  | 29 | T | NGQLAQLT    | Q | -0.3  | 6.02  |               |
| 2   | P00772 ELA1 | 1 | 844.4443  | 0.8  | 257   | 263 | 0  | 35.6  | 27 | I | SWINNV      | A | 0.6   | 6.02  |               |
| 2   | P00772 ELA1 | 2 | 882.5287  | 0.9  | 138   | 146 | 0  | 48.6  | 25 | L | GVLPRAGTI   | L | 0.7   | 11.04 |               |
| 2   | P00772 ELA1 | 1 | 885.3869  | -1.5 | 187   | 194 | 0  | 29.8  | 24 | S | SSYWGSTV    | K | -0.2  | 5.92  |               |
| 2   | P00772 ELA1 | 2 | 890.461   | -0.4 | 156   | 163 | 0  | 36.4  | 29 | I | TGWGLTRT    | N | -0.6  | 11.04 |               |
| 2   | P00772 ELA1 | 2 | 909.5396  | 1.2  | 136   | 144 | 0  | 47.2  | 21 | V | QLGVLPRAG   | T | 0.4   | 11.04 |               |
| 2   | P00772 ELA1 | 1 | 911.3661  | -1.2 | 108   | 114 | 0  | 35.6  | 23 | P | YWNTDDV     | A | -1.3  | 2.92  |               |
| 2   | P00772 ELA1 | 2 | 915.4814  | 1.2  | 257   | 264 | 0  | 43.2  | 27 | I | SWINNVIA    | S | 0.8   | 6.02  |               |
| 2   | P00772 ELA1 | 2 | 943.4512  | 1.0  | 223   | 231 | 0  | 49.1  | 26 | V | NGQYAVHGV   | T | -0.2  | 7.76  |               |
| 2   | P00772 ELA1 | 1 | 966.4295  | 0.1  | 92    | 100 | 0  | 34.4  | 27 | N | DGTEQYVGV   | Q | -0.5  | 3     |               |
| 2   | P00772 ELA1 | 1 | 993.5131  | -1.9 | 130   | 138 | 0  | 56.0  | 27 | V | TLNSYVQLG   | V | 0.2   | 5.92  |               |
| 2   | P00772 ELA1 | 2 | 1009.6284 | 1.3  | 139   | 148 | 0  | 42.0  | 20 | G | VLPRAGTILA  | N | 1.3   | 11.04 |               |
| 2   | P00772 ELA1 | 2 | 1013.4818 | 0.9  | 187   | 195 | 0  | 34.0  | 27 | S | SSYWGSTVK   | N | -0.6  | 9.72  |               |
| 2   | P00772 ELA1 | 2 | 1014.4923 | 0.6  | 104   | 111 | 0  | 35.5  | 25 | I | VVHPYWNT    | D | -0.4  | 7.76  |               |
| 2   | P00772 ELA1 | 1 | 1020.4811 | -1.8 | 62    | 69  | 0  | 28.2  | 28 | I | RQNWVMTA    | A | -0.7  | 11.04 | Oxidation (M) |
| 2   | P00772 ELA1 | 2 | 1029.5203 | -0.9 | 27    | 36  | 0  | 64.0  | 28 | R | VVGGTEAQRN  | S | -0.6  | 6.98  |               |
| 2   | P00772 ELA1 | 1 | 1040.4927 | -1.7 | 189   | 197 | 0  | 35.7  | 27 | S | YWGSTVKNS   | M | -0.9  | 9.72  |               |
| 2   | P00772 ELA1 | 2 | 1044.4989 | 0.0  | 223   | 232 | 0  | 27.6  | 27 | V | NGQYAVHGV   | S | -0.3  | 7.76  |               |
| 2   | P00772 ELA1 | 2 | 1066.6499 | 0.8  | 138   | 148 | 0  | 50.1  | 22 | L | GVLPRAGTILA | N | 1.1   | 11.04 |               |
| 2   | P00772 ELA1 | 2 | 1100.5938 | 0.4  | 162   | 171 | 0  | 44.6  | 29 | T | RTNGQLAQLT  | Q | -0.7  | 11.04 |               |
| 2   | P00772 ELA1 | 1 | 1114.5519 | 0.4  | 34    | 42  | 0  | 31.1  | 28 | A | QRNSWPSQI   | S | -1.6  | 11.04 |               |
| 2   | P00772 ELA1 | 2 | 1116.5564 | 1.9  | 257   | 266 | 0  | 37.6  | 28 | I | SWINNVIAN   | - | 0.2   | 6.02  |               |
| 2   | P00772 ELA1 | 2 | 1123.6713 | -0.1 | 136   | 146 | 0  | 23.8  | 23 | V | QLGVLPRAGTI | L | 0.6   | 11.04 |               |
| 2   | P00772 ELA1 | 2 | 1127.5247 | 0.4  | 187   | 196 | 0  | 47.0  | 26 | S | SSYWGSTVKN  | S | -0.9  | 9.72  |               |
| 2   | P00772 ELA1 | 2 | 1145.4778 | -0.3 | 106   | 114 | 0  | 42.0  | 21 | V | HPYWNTDDV   | A | -1.6  | 3.88  |               |
| 2   | P00772 ELA1 | 1 | 1166.484  | -1.0 | 89    | 98  | 0  | 26.5  | 22 | L | NQNDGTEQYV  | G | -1.9  | 3     |               |
| 2   | P00772 ELA1 | 2 | 1170.5993 | 0.3  | 164   | 174 | 0  | 62.4  | 27 | T | NGQLAQLTQQA | Y | -0.7  | 6.02  |               |
| 2   | P00772 ELA1 | 2 | 1214.5568 | 0.5  | 187   | 197 | 0  | 51.0  | 25 | S | SSYWGSTVKNS | M | -0.9  | 9.72  |               |
| 2   | P00772 ELA1 | 2 | 1240.5836 | 0.1  | 43    | 53  | 0  | 65.4  | 26 | I | SLQYRSGSSWA | H | -0.7  | 9.84  |               |

| hit | accession   | z | mass      | ppm  | start | end | mc | score | id | - | sequence           | + | gravy | pl    | modification |
|-----|-------------|---|-----------|------|-------|-----|----|-------|----|---|--------------------|---|-------|-------|--------------|
| 2   | P00772 ELA1 | 2 | 1244.5462 | 1.2  | 105   | 114 | 0  | 69.3  | 25 | V | VHPYWNTDDV         | A | -1.0  | 3.88  |              |
| 2   | P00772 ELA1 | 2 | 1258.7034 | -0.2 | 133   | 144 | 0  | 66.4  | 27 | N | SYVQLGVLPRAG       | T | 0.4   | 9.84  |              |
| 2   | P00772 ELA1 | 2 | 1307.7925 | 0.5  | 136   | 148 | 0  | 30.8  | 20 | V | QLGVLPRAGTILA      | N | 1.0   | 11.04 |              |
| 2   | P00772 ELA1 | 2 | 1315.5833 | 0.7  | 105   | 115 | 0  | 46.5  | 25 | V | VHPYWNTDDVA        | A | -0.7  | 3.88  |              |
| 2   | P00772 ELA1 | 2 | 1343.6146 | 1.1  | 104   | 114 | 0  | 65.6  | 27 | I | VVHPYWNTDDV        | A | -0.5  | 3.88  |              |
| 2   | P00772 ELA1 | 2 | 1372.7463 | -0.1 | 132   | 144 | 0  | 86.1  | 28 | L | NSYVQLGVLPRAG      | T | 0.1   | 9.84  |              |
| 2   | P00772 ELA1 | 2 | 1386.6204 | 0.7  | 105   | 116 | 0  | 48.5  | 26 | V | VHPYWNTDDVAA       | G | -0.5  | 3.88  |              |
| 2   | P00772 ELA1 | 2 | 1395.6379 | -1.8 | 82    | 94  | 0  | 56.2  | 27 | V | VVGEHNLNQNDGT      | E | -1.0  | 4.06  |              |
| 2   | P00772 ELA1 | 2 | 1414.6517 | 0.9  | 104   | 115 | 0  | 58.9  | 27 | I | VVHPYWNTDDVA       | A | -0.3  | 3.88  |              |
| 2   | P00772 ELA1 | 2 | 1417.7929 | 0.5  | 117   | 129 | 0  | 28.0  | 26 | A | GYDIALLRLAQSV      | T | 0.7   | 6.7   |              |
| 2   | P00772 ELA1 | 2 | 1425.612  | -1.5 | 83    | 95  | 0  | 74.7  | 23 | V | VGEHNLNQNDGTE      | Q | -1.6  | 3.82  |              |
| 2   | P00772 ELA1 | 2 | 1427.7481 | 0.5  | 162   | 174 | 0  | 45.0  | 29 | T | RTNGQLAQTLLQA      | Y | -1.0  | 11.04 |              |
| 2   | P00772 ELA1 | 2 | 1443.6419 | -0.4 | 105   | 117 | 0  | 29.9  | 24 | V | VHPYWNTDDVAAG      | Y | -0.5  | 3.88  |              |
| 2   | P00772 ELA1 | 2 | 1456.6987 | 0.1  | 103   | 114 | 0  | 63.6  | 28 | K | IVVHPYWNTDDV       | A | -0.1  | 3.88  |              |
| 2   | P00772 ELA1 | 2 | 1458.8195 | -1.2 | 130   | 142 | 0  | 37.5  | 27 | V | TLNSYVQLGVLPR      | A | 0.3   | 9.84  |              |
| 2   | P00772 ELA1 | 2 | 1485.6889 | 0.5  | 104   | 116 | 0  | 45.7  | 27 | I | VVHPYWNTDDVAA      | G | -0.2  | 3.88  |              |
| 2   | P00772 ELA1 | 2 | 1485.8304 | 0.5  | 131   | 144 | 0  | 50.2  | 27 | T | LNSYVQLGVLPRAG     | T | 0.4   | 9.84  |              |
| 2   | P00772 ELA1 | 2 | 1486.7165 | -0.8 | 27    | 40  | 0  | 31.0  | 28 | R | VVGGTEAQRNSWPS     | Q | -0.7  | 6.98  |              |
| 2   | P00772 ELA1 | 2 | 1524.6805 | -2.0 | 82    | 95  | 0  | 54.4  | 25 | V | VVGEHNLNQNDGTE     | Q | -1.2  | 3.82  |              |
| 2   | P00772 ELA1 | 1 | 1542.7103 | -1.6 | 104   | 117 | 0  | 51.4  | 26 | I | VVHPYWNTDDVAAG     | Y | -0.2  | 3.88  |              |
| 2   | P00772 ELA1 | 2 | 1553.6706 | -1.1 | 83    | 96  | 0  | 72.7  | 23 | V | VGEHNLNQNDGTEQ     | Y | -1.8  | 3.82  |              |
| 2   | P00772 ELA1 | 2 | 1586.878  | 0.3  | 130   | 144 | 0  | 75.7  | 27 | V | TLNSYVQLGVLPRAG    | T | 0.3   | 9.84  |              |
| 2   | P00772 ELA1 | 2 | 1652.739  | -2.2 | 82    | 96  | 0  | 86.0  | 25 | V | VVGEHNLNQNDGTEQ    | Y | -1.4  | 3.82  |              |
| 2   | P00772 ELA1 | 2 | 1659.7125 | -0.5 | 85    | 98  | 0  | 63.1  | 23 | G | EHNLNQNDGTEQYV     | G | -1.8  | 3.82  |              |
| 2   | P00772 ELA1 | 2 | 1705.7737 | -0.1 | 104   | 118 | 0  | 51.9  | 26 | I | VVHPYWNTDDVAAGY    | D | -0.2  | 3.88  |              |
| 2   | P00772 ELA1 | 2 | 1712.8522 | -1.8 | 101   | 114 | 0  | 36.3  | 28 | V | QKIVVHPYWNTDDV     | A | -0.6  | 5.1   |              |
| 2   | P00772 ELA1 | 2 | 1716.7339 | -1.1 | 84    | 98  | 0  | 35.4  | 22 | V | GEHNLNQNDGTEQYV    | G | -1.7  | 3.82  |              |
| 2   | P00772 ELA1 | 2 | 1716.7339 | -1.0 | 83    | 97  | 0  | 28.7  | 22 | V | VGEHNLNQNDGTEQY    | V | -1.7  | 3.82  |              |
| 2   | P00772 ELA1 | 2 | 1727.8591 | -1.6 | 27    | 42  | 0  | 42.6  | 29 | R | VVGGTEAQRNSWPSQI   | S | -0.6  | 6.98  |              |
| 2   | P00772 ELA1 | 2 | 1770.9992 | 0.0  | 132   | 148 | 0  | 38.9  | 27 | L | NSYVQLGVLPRAGTILA  | N | 0.7   | 9.84  |              |
| 2   | P00772 ELA1 | 2 | 1806.7849 | -1.3 | 106   | 121 | 0  | 32.4  | 23 | V | HPYWNTDDVAAGYDIA   | L | -0.6  | 3.6   |              |
| 2   | P00772 ELA1 | 2 | 1815.8024 | -0.2 | 85    | 100 | 0  | 68.2  | 24 | G | EHNLNQNDGTEQYVGV   | Q | -1.4  | 3.82  |              |
| 2   | P00772 ELA1 | 1 | 1815.8024 | -0.8 | 83    | 98  | 0  | 71.9  | 24 | V | VGEHNLNQNDGTEQYV   | G | -1.4  | 3.82  |              |
| 2   | P00772 ELA1 | 2 | 1815.8024 | -0.3 | 82    | 97  | 0  | 29.9  | 24 | V | VVGEHNLNQNDGTEQY   | V | -1.4  | 3.82  |              |
| 2   | P00772 ELA1 | 2 | 1901.0371 | 0.0  | 127   | 144 | 0  | 110.7 | 28 | A | QSVTLNSYVQLGVLPRAG | T | 0.3   | 9.84  |              |
| 2   | P00772 ELA1 | 2 | 1905.8533 | 0.9  | 105   | 121 | 0  | 66.6  | 26 | V | VHPYWNTDDVAAGYDIA  | L | -0.3  | 3.6   |              |
| 2   | P00772 ELA1 | 2 | 1907.9086 | -0.2 | 80    | 96  | 0  | 77.8  | 29 | F | RVVGEHNLNQNDGTEQ   | Y | -1.2  | 4.42  |              |
| 2   | P00772 ELA1 | 1 | 1914.8708 | -1.1 | 82    | 98  | 0  | 107.8 | 26 | V | VVGEHNLNQNDGTEQYV  | G | -1.0  | 3.82  |              |
| 2   | P00772 ELA1 | 2 | 1933.8847 | 0.0  | 104   | 120 | 0  | 35.3  | 27 | I | VVHPYWNTDDVAAGYDI  | A | -0.2  | 3.6   |              |
| 2   | P00772 ELA1 | 1 | 1971.8923 | -2.4 | 83    | 100 | 0  | 77.1  | 26 | V | VGEHNLNQNDGTEQYVGV | Q | -1.0  | 3.82  |              |

| hit | accession   | z | mass      | ppm  | start | end | mc | score | id | - | sequence             | + | gravy | pl    | modification  |
|-----|-------------|---|-----------|------|-------|-----|----|-------|----|---|----------------------|---|-------|-------|---------------|
| 2   | P00772 ELA1 | 2 | 2004.9218 | -1.6 | 104   | 121 | 0  | 75.5  | 26 | I | VVHPYWNTDDVAAGYDIA   | L | -0.1  | 3.6   |               |
| 2   | P00772 ELA1 | 2 | 2070.9607 | -0.5 | 82    | 100 | 0  | 71.1  | 28 | V | VVGEHNLNQNDGTEQYVGV  | Q | -0.7  | 3.82  |               |
| 2   | P00772 ELA1 | 2 | 2118.0058 | -0.8 | 103   | 121 | 0  | 32.0  | 29 | K | IVVHPYWNTDDVAAGYDIA  | L | 0.2   | 3.6   |               |
| 2   | P00772 ELA1 | 2 | 2231.0899 | 1.6  | 104   | 123 | 0  | 58.4  | 30 | I | VVHPYWNTDDVAAGYDIALL | R | 0.3   | 3.6   |               |
| 3   | Cg0446      | 1 | 641.3748  | 1.2  | 50    | 55  | 0  | 46.7  | 29 | M | NLVSPL               | N | 1.0   | 6.02  |               |
| 3   | Cg0446      | 1 | 670.2962  | -0.1 | 286   | 291 | 0  | 23.8  | 23 | A | YFASPS               | F | 0.0   | 5.92  |               |
| 3   | Cg0446      | 1 | 753.4021  | 0.1  | 205   | 211 | 0  | 34.8  | 26 | I | HLGSVEI              | F | 0.7   | 5.12  |               |
| 3   | Cg0446      | 1 | 796.4443  | -0.5 | 372   | 380 | 0  | 43.5  | 25 | I | NAGLGVGPL            | N | 0.8   | 6.02  |               |
| 3   | Cg0446      | 1 | 837.4273  | 1.4  | 661   | 667 | 0  | 23.0  | 23 | L | FFESVPL              | Q | 1.1   | 3.3   |               |
| 3   | Cg0446      | 1 | 888.3613  | -0.6 | 643   | 650 | 0  | 28.2  | 21 | V | SAWEPGEN             | G | -1.6  | 3.12  |               |
| 3   | Cg0446      | 2 | 888.4494  | 0.7  | 292   | 298 | 0  | 32.8  | 25 | S | FIQFHPT              | G | 0.2   | 7.84  |               |
| 3   | Cg0446      | 1 | 935.4825  | -0.7 | 171   | 179 | 0  | 35.8  | 28 | T | RSFGGVQVS            | R | 0.1   | 11.04 |               |
| 3   | Cg0446      | 2 | 966.4559  | 1.1  | 159   | 167 | 0  | 37.9  | 25 | A | PFAREYGGA            | L | -0.6  | 6.88  |               |
| 3   | Cg0446      | 1 | 1029.5495 | -1.2 | 487   | 496 | 0  | 34.8  | 30 | I | PNYLGPLLGS           | E | 0.2   | 5.92  |               |
| 3   | Cg0446      | 1 | 1046.4305 | -0.8 | 643   | 652 | 0  | 28.0  | 22 | V | SAWEPGENGT           | F | -1.4  | 3.12  |               |
| 3   | Cg0446      | 1 | 1066.5335 | -2.8 | 661   | 669 | 0  | 34.2  | 27 | L | FFESVPLQT            | R | 0.4   | 3.3   |               |
| 3   | Cg0446      | 1 | 1067.4845 | -0.2 | 598   | 606 | 0  | 49.7  | 26 | A | DYIDLGELM            | C | 0.2   | 2.88  |               |
| 3   | Cg0446      | 1 | 1083.4794 | -0.6 | 598   | 606 | 0  | 43.4  | 24 | A | DYIDLGELM            | C | 0.2   | 2.88  | Oxidation (M) |
| 3   | Cg0446      | 1 | 1094.459  | -0.5 | 415   | 424 | 0  | 29.0  | 23 | A | IGEDPYSSPM           | R | -0.7  | 3     |               |
| 3   | Cg0446      | 1 | 1094.5145 | -0.7 | 157   | 167 | 0  | 32.6  | 28 | I | GAPFAREYGGA          | L | -0.4  | 6.88  |               |
| 3   | Cg0446      | 1 | 1095.5673 | -0.5 | 372   | 383 | 0  | 51.7  | 27 | I | NAGLGVGPLNNA         | A | 0.2   | 6.02  |               |
| 3   | Cg0446      | 2 | 1134.5921 | -0.4 | 77    | 87  | 0  | 63.1  | 29 | A | ALGELGYDVKA          | F | 0.2   | 4.08  |               |
| 3   | Cg0446      | 1 | 1166.6044 | -0.7 | 372   | 384 | 0  | 40.0  | 28 | I | NAGLGVGPLNNA         | Y | 0.3   | 6.02  |               |
| 3   | Cg0446      | 1 | 1203.5594 | -4.2 | 212   | 221 | 0  | 39.8  | 26 | I | FTHNEMVDVI           | V | 0.3   | 4.06  |               |
| 3   | Cg0446      | 1 | 1205.5353 | -2.3 | 644   | 654 | 0  | 26.6  | 24 | S | AWEPGENGTFV          | R | -0.5  | 3.12  |               |
| 3   | Cg0446      | 1 | 1205.6292 | -2.7 | 76    | 87  | 0  | 28.6  | 28 | A | AALGELGYDVKA         | F | 0.4   | 4.08  |               |
| 3   | Cg0446      | 2 | 1207.5986 | 0.3  | 156   | 167 | 0  | 56.7  | 28 | A | IGAPFAREYGGA         | L | 0.0   | 6.88  |               |
| 3   | Cg0446      | 1 | 1216.6815 | -3.3 | 489   | 499 | 0  | 29.6  | 27 | N | YLGPLLGSERL          | S | 0.2   | 6.88  |               |
| 3   | Cg0446      | 2 | 1243.568  | -0.6 | 497   | 507 | 0  | 36.3  | 27 | S | ERLSEDAPEAQ          | A | -1.5  | 3.68  |               |
| 3   | Cg0446      | 2 | 1244.5997 | 1.6  | 553   | 563 | 0  | 59.7  | 28 | V | SRNVEDLQDGI          | N | -1.0  | 3.7   |               |
| 3   | Cg0446      | 2 | 1254.6761 | -1.8 | 292   | 302 | 0  | 60.2  | 27 | S | FIQFHPTGLPV          | N | 0.6   | 7.84  |               |
| 3   | Cg0446      | 1 | 1292.5673 | 0.2  | 643   | 654 | 0  | 34.9  | 25 | V | SAWEPGENGTFV         | R | -0.5  | 3.12  |               |
| 3   | Cg0446      | 2 | 1330.6001 | -1.2 | 496   | 507 | 0  | 64.1  | 26 | G | SERLSEDAPEAQ         | A | -1.5  | 3.68  |               |
| 3   | Cg0446      | 2 | 1363.6442 | -0.2 | 415   | 426 | 0  | 38.8  | 28 | A | IGEDPYSSPMRI         | A | -0.6  | 4.08  |               |
| 3   | Cg0446      | 1 | 1372.6194 | -2.5 | 521   | 532 | 0  | 47.0  | 26 | L | MGNRPEWVGDNV         | H | -1.0  | 4.08  |               |
| 3   | Cg0446      | 2 | 1379.6834 | 0.9  | 157   | 170 | 0  | 29.4  | 28 | I | GAPFAREYGGALAT       | R | 0.1   | 6.88  |               |
| 3   | Cg0446      | 2 | 1400.6896 | 0.1  | 551   | 563 | 0  | 43.0  | 28 | C | GVSARNVEDLQDGI       | N | -0.5  | 3.7   |               |
| 3   | Cg0446      | 2 | 1427.7772 | 0.2  | 487   | 499 | 0  | 49.6  | 28 | I | PNYLGPLLGSERL        | S | -0.2  | 6.88  |               |
| 3   | Cg0446      | 1 | 1455.6188 | -3.5 | 581   | 593 | 0  | 45.2  | 23 | T | GSTDEMNVQVLEYA       | A | -0.7  | 2.94  |               |
| 3   | Cg0446      | 1 | 1469.6609 | -3.9 | 256   | 269 | 0  | 46.4  | 25 | A | TGGYGNVYHMSTLA       | K | -0.1  | 7.7   |               |



| hit | accession | z | mass      | ppm  | start | end | mc | score | id | - | sequence                            | + | gravy | pl   | modification |
|-----|-----------|---|-----------|------|-------|-----|----|-------|----|---|-------------------------------------|---|-------|------|--------------|
| 3   | Cg0446    | 1 | 1526.6559 | -2.9 | 581   | 594 | 0  | 31.2  | 23 | T | GSTDEMNVQVLEYAA                     | R | -0.5  | 2.94 |              |
| 3   | Cg0446    | 1 | 1540.8038 | -1.8 | 655   | 667 | 0  | 36.2  | 28 | V | RHAEPVFFESVPL                       | Q | 0.0   | 5.3  |              |
| 3   | Cg0446    | 1 | 1556.6664 | -4.1 | 580   | 593 | 0  | 24.0  | 23 | I | TGSTDEMNVQVLEYA                     | A | -0.7  | 2.94 |              |
| 3   | Cg0446    | 2 | 1599.8216 | -1.8 | 553   | 566 | 0  | 76.8  | 29 | V | SRNVEDLQDGINKI                      | R | -1.0  | 4.3  |              |
| 3   | Cg0446    | 2 | 1641.8111 | -0.1 | 182   | 195 | 0  | 46.5  | 29 | T | YYTRGQTGQQQLS                       | T | -1.2  | 9.58 |              |
| 3   | Cg0446    | 1 | 1669.7505 | -4.1 | 579   | 593 | 0  | 43.1  | 26 | R | ITGSTDEMNVQVLEYA                    | A | -0.3  | 2.94 |              |
| 3   | Cg0446    | 1 | 1724.8832 | -2.8 | 17    | 34  | 0  | 29.1  | 29 | V | SVLPEVSAGTVLDAAEPA                  | G | 0.6   | 2.94 |              |
| 3   | Cg0446    | 2 | 1756.8315 | -1.4 | 518   | 532 | 0  | 47.3  | 27 | I | DRLMGNRPEWVGDNV                     | H | -1.0  | 4.3  |              |
| 3   | Cg0446    | 2 | 1769.9101 | -1.5 | 655   | 669 | 0  | 88.0  | 29 | V | RHAEPVFFESVPLQT                     | R | -0.2  | 5.3  |              |
| 3   | Cg0446    | 2 | 1775.8049 | -1.1 | 151   | 167 | 0  | 72.5  | 26 | I | DHMNAIGAPFAREYGGGA                  | L | -0.3  | 5.22 |              |
| 3   | Cg0446    | 2 | 1805.9676 | -2.0 | 8     | 23  | 0  | 62.4  | 29 | T | TRPEFIHPVSVLPEVS                    | A | 0.1   | 5.3  |              |
| 3   | Cg0446    | 2 | 1835.8335 | -2.1 | 39    | 52  | 0  | 57.9  | 26 | T | KDMWEYQKDHMNLV                      | S | -1.4  | 5.28 |              |
| 3   | Cg0446    | 2 | 1852.8625 | -0.7 | 581   | 597 | 0  | 66.3  | 28 | T | GSTDEMNVQVLEYAARVA                  | D | -0.3  | 3.82 |              |
| 3   | Cg0446    | 2 | 1869.9156 | -0.9 | 517   | 532 | 0  | 31.2  | 29 | R | IDRLMGNRPEWVGDNV                    | H | -0.7  | 4.3  |              |
| 3   | Cg0446    | 2 | 1953.9102 | 0.4  | 580   | 597 | 0  | 89.8  | 27 | I | TGSTDEMNVQVLEYAARVA                 | D | -0.4  | 3.82 |              |
| 3   | Cg0446    | 2 | 1959.9261 | -2.3 | 151   | 169 | 0  | 77.4  | 28 | I | DHMNAIGAPFAREYGGALA                 | T | 0.0   | 5.22 |              |
| 3   | Cg0446    | 2 | 2044.0113 | -0.6 | 489   | 507 | 0  | 80.6  | 30 | N | YLGPLLGSERLSEDAPEAQ                 | A | -0.5  | 3.68 |              |
| 3   | Cg0446    | 2 | 2060.9738 | -2.3 | 151   | 170 | 0  | 60.5  | 28 | I | DHMNAIGAPFAREYGGALAT                | R | -0.1  | 5.22 |              |
| 3   | Cg0446    | 2 | 2133.0023 | -2.6 | 39    | 55  | 0  | 85.7  | 28 | T | KDMWEYQKDHMNLVSP                    | N | -1.0  | 5.28 |              |
| 3   | Cg0446    | 2 | 2144.0585 | -2.4 | 148   | 167 | 0  | 84.3  | 30 | V | RVIDHMNAIGAPFAREYGGGA               | L | -0.1  | 7.76 |              |
| 3   | Cg0446    | 2 | 2190.0238 | -1.8 | 35    | 52  | 0  | 55.1  | 28 | A | GVPTKDMWEYQKDHMNLV                  | S | -1.0  | 5.28 |              |
| 3   | Cg0446    | 2 | 2255.1069 | -0.2 | 487   | 507 | 0  | 57.3  | 30 | I | PNYLGPLLGSERLSEDAPEAQ               | A | -0.7  | 3.68 |              |
| 3   | Cg0446    | 2 | 2257.1426 | -1.9 | 148   | 168 | 0  | 31.2  | 30 | V | RVIDHMNAIGAPFAREYGGAL               | A | 0.1   | 7.76 |              |
| 3   | Cg0446    | 3 | 2349.1866 | -0.6 | 77    | 97  | 0  | 66.8  | 30 | A | ALGELGYDVKAFTYHDAPRRA               | H | -0.5  | 7.68 |              |
| 3   | Cg0446    | 3 | 2429.2274 | -3.4 | 148   | 170 | 0  | 34.3  | 31 | V | RVIDHMNAIGAPFAREYGGALAT             | R | 0.1   | 7.76 |              |
| 3   | Cg0446    | 2 | 2448.2285 | -2.4 | 2     | 23  | 0  | 65.5  | 30 | M | STHSETTRPEFIHPVSVLPEVS              | A | -0.4  | 5.22 |              |
| 3   | Cg0446    | 2 | 2487.1926 | -2.8 | 35    | 55  | 0  | 48.3  | 29 | A | GVPTKDMWEYQKDHMNLVSP                | N | -0.8  | 5.28 |              |
| 3   | Cg0446    | 2 | 2678.3745 | -1.8 | 475   | 498 | 0  | 95.0  | 30 | A | SVDGWFTLPFTIPNYLGPLLGSER            | L | 0.1   | 4.08 |              |
| 3   | Cg0446    | 2 | 2728.3286 | -1.3 | 644   | 667 | 0  | 31.2  | 30 | S | AWEPGENGTFVVRHAEPVFFESVPL           | Q | -0.2  | 4.24 |              |
| 3   | Cg0446    | 2 | 2791.4585 | -2.1 | 475   | 499 | 0  | 53.8  | 30 | A | SVDGWFTLPFTIPNYLGPLLGSERL           | S | 0.3   | 4.08 |              |
| 3   | Cg0446    | 2 | 2801.46   | -2.1 | 8     | 34  | 0  | 92.5  | 30 | T | TRPEFIHPVSVLPEVSAGTVLDAAEPA         | G | 0.3   | 4.16 |              |
| 3   | Cg0446    | 2 | 2878.4905 | -2.4 | 475   | 500 | 0  | 48.4  | 31 | A | SVDGWFTLPFTIPNYLGPLLGSERLS          | E | 0.2   | 4.08 |              |
| 3   | Cg0446    | 2 | 2957.4348 | -2.3 | 644   | 669 | 0  | 34.5  | 30 | S | AWEPGENGTFVVRHAEPVFFESVPLQT         | R | -0.4  | 4.24 |              |
| 3   | Cg0446    | 2 | 3044.4668 | -3.7 | 643   | 669 | 0  | 46.9  | 30 | V | SAWEPGENGTFVVRHAEPVFFESVPLQT        | R | -0.4  | 4.24 |              |
| 3   | Cg0446    | 3 | 3443.7209 | -2.8 | 2     | 34  | 0  | 51.7  | 31 | M | STHSETTRPEFIHPVSVLPEVSAGTVLDAAEPA   | G | -0.1  | 4.34 |              |
| 3   | Cg0446    | 2 | 3618.7882 | -0.8 | 475   | 507 | 0  | 44.1  | 31 | A | SVDGWFTLPFTIPNYLGPLLGSERLSEDAPEAQ   | A | -0.2  | 3.5  |              |
| 3   | Cg0446    | 2 | 3689.8253 | -3.1 | 475   | 508 | 0  | 32.9  | 31 | A | SVDGWFTLPFTIPNYLGPLLGSERLSEDAPEAQA  | A | -0.1  | 3.5  |              |
| 3   | Cg0446    | 2 | 3760.8624 | -3.8 | 475   | 509 | 0  | 33.0  | 31 | A | SVDGWFTLPFTIPNYLGPLLGSERLSEDAPEAQAA | I | -0.1  | 3.5  |              |
| 4   | Cg2705    | 1 | 680.317   | 0.6  | 342   | 346 | 0  | 29.6  | 26 | V | DWLFT                               | S | 0.3   | 3.1  |              |
| 4   | Cg2705    | 1 | 809.3959  | 0.0  | 360   | 366 | 0  | 29.0  | 28 | G | FIAPFES                             | Y | 0.9   | 3.3  |              |

| hit | accession | z | mass      | ppm  | start | end | mc | score | id | - | sequence          | + | gravy | pl   | modification |
|-----|-----------|---|-----------|------|-------|-----|----|-------|----|---|-------------------|---|-------|------|--------------|
| 4   | Cg2705    | 1 | 975.4662  | -1.1 | 38    | 45  | 0  | 42.6  | 29 | L | NFKPEQDV          | A | -1.6  | 4.08 |              |
| 4   | Cg2705    | 1 | 1013.4859 | 0.0  | 340   | 347 | 0  | 39.5  | 26 | D | FVDWLFTS          | E | 1.0   | 3.1  |              |
| 4   | Cg2705    | 1 | 1019.4712 | -2.3 | 211   | 218 | 0  | 28.3  | 26 | A | NAPIWQEY          | Q | -1.0  | 3.3  |              |
| 4   | Cg2705    | 1 | 1159.6237 | -2.5 | 418   | 427 | 0  | 50.5  | 28 | A | SGKWKWEDVV        | K | -0.5  | 6.98 |              |
| 4   | Cg2705    | 1 | 1169.5757 | -1.5 | 338   | 346 | 0  | 44.1  | 27 | T | KDFVDWLFT         | S | 0.1   | 3.88 |              |
| 4   | Cg2705    | 1 | 1184.5383 | -2.7 | 258   | 268 | 0  | 45.3  | 26 | S | KTVSDSMAEFA       | Q | -0.1  | 4.08 |              |
| 4   | Cg2705    | 1 | 1222.6234 | -2.7 | 356   | 366 | 0  | 39.8  | 27 | V | KDLGFIAPFES       | Y | 0.2   | 4.08 |              |
| 4   | Cg2705    | 1 | 1235.6186 | -2.5 | 36    | 45  | 0  | 43.5  | 28 | Y | FLNFKPEQDV        | A | -0.6  | 4.08 |              |
| 4   | Cg2705    | 1 | 1246.4635 | -0.3 | 99    | 108 | 0  | 13.9  | 13 | I | TWQDYMDMS         | D | -0.9  | 2.92 |              |
| 4   | Cg2705    | 1 | 1273.6303 | -3.5 | 126   | 137 | 0  | 36.6  | 28 | T | EDGEVRGVPFAV      | E | 0.0   | 3.82 |              |
| 4   | Cg2705    | 1 | 1340.7188 | -0.2 | 114   | 125 | 0  | 57.6  | 28 | A | KQLTDDIPPLTT      | E | -0.6  | 3.88 |              |
| 4   | Cg2705    | 1 | 1385.6867 | -1.0 | 356   | 367 | 0  | 48.9  | 29 | V | KDLGFIAPFESY      | T | 0.1   | 4.08 |              |
| 4   | Cg2705    | 1 | 1412.6419 | -1.0 | 370   | 382 | 0  | 34.6  | 26 | A | ENTPNDPLSEQVA     | E | -1.2  | 2.94 |              |
| 4   | Cg2705    | 1 | 1445.7402 | -2.3 | 79    | 91  | 0  | 31.5  | 30 | A | EIGKDEAPTLFQV     | N | -0.3  | 3.82 |              |
| 4   | Cg2705    | 1 | 1484.6797 | -3.2 | 199   | 210 | 0  | 33.1  | 26 | T | SGEDWRWQTHLA      | N | -1.4  | 5.22 |              |
| 4   | Cg2705    | 2 | 1490.6929 | -0.2 | 144   | 155 | 0  | 33.2  | 27 | I | YNDEIFDKYIAT      | S | -0.6  | 3.7  |              |
| 4   | Cg2705    | 2 | 1496.642  | -3.3 | 215   | 226 | 0  | 30.1  | 23 | I | WQEYQDKGVEDT      | N | -2.0  | 3.58 |              |
| 4   | Cg2705    | 1 | 1552.7443 | -3.4 | 254   | 268 | 0  | 53.6  | 28 | S | LAPSKTVSDSMAEFA   | Q | 0.2   | 4.08 |              |
| 4   | Cg2705    | 1 | 1557.7715 | -5.0 | 356   | 369 | 0  | 35.9  | 29 | V | KDLGFIAPFESYTA    | E | 0.1   | 4.08 |              |
| 4   | Cg2705    | 1 | 1563.6374 | -1.6 | 96    | 108 | 0  | 32.2  | 19 | A | GFITWQDYMDMS      | D | -0.1  | 2.92 |              |
| 4   | Cg2705    | 2 | 1577.7249 | 1.2  | 144   | 156 | 0  | 31.0  | 27 | I | YNDEIFDKYIATS     | G | -0.6  | 3.7  |              |
| 4   | Cg2705    | 1 | 1579.7518 | -3.4 | 38    | 50  | 0  | 44.3  | 28 | L | NFKPEQDVAYQEI     | A | -1.1  | 3.82 |              |
| 4   | Cg2705    | 1 | 1584.7267 | -2.8 | 368   | 382 | 0  | 51.7  | 26 | Y | TAENTPNDPLSEQVA   | E | -1.0  | 2.94 |              |
| 4   | Cg2705    | 1 | 1612.7216 | -2.7 | 370   | 384 | 0  | 36.3  | 25 | A | ENTPNDPLSEQVAEA   | I | -1.2  | 2.88 |              |
| 4   | Cg2705    | 1 | 1650.7889 | -1.6 | 38    | 51  | 0  | 38.9  | 28 | L | NFKPEQDVAYQEIA    | K | -0.9  | 3.82 |              |
| 4   | Cg2705    | 2 | 1690.809  | 0.6  | 143   | 156 | 0  | 33.4  | 29 | I | IYNDEIFDKYIATS    | G | -0.3  | 3.7  |              |
| 4   | Cg2705    | 1 | 1712.8046 | -1.8 | 333   | 346 | 0  | 41.0  | 27 | V | DQQATKDFVDWLFT    | S | -0.6  | 3.6  |              |
| 4   | Cg2705    | 1 | 1725.8057 | -3.8 | 370   | 385 | 0  | 40.9  | 27 | A | ENTPNDPLSEQVAEAI  | A | -0.8  | 2.88 |              |
| 4   | Cg2705    | 1 | 1739.84   | 3.0  | 167   | 181 | 0  | 49.4  | 29 | I | TSYQKLKEVAEDMQA   | K | -1.0  | 4.44 |              |
| 4   | Cg2705    | 1 | 1747.7901 | -1.4 | 367   | 382 | 0  | 47.6  | 26 | S | YTAENTPNDPLSEQVA  | E | -1.0  | 2.94 |              |
| 4   | Cg2705    | 1 | 1749.7781 | -3.8 | 274   | 288 | 0  | 32.7  | 24 | A | MVQNGNWAWSQISET   | S | -0.6  | 3.3  |              |
| 4   | Cg2705    | 1 | 1784.8064 | -2.5 | 368   | 384 | 0  | 35.0  | 26 | Y | TAENTPNDPLSEQVAEA | I | -1.0  | 2.88 |              |
| 4   | Cg2705    | 2 | 1785.8434 | -1.2 | 196   | 210 | 0  | 51.9  | 28 | T | SLTSGEDWRWQTHLA   | N | -0.9  | 5.22 |              |
| 4   | Cg2705    | 2 | 1788.7955 | -1.3 | 403   | 417 | 0  | 46.6  | 25 | S | QQFKDDFGQDLSQYA   | S | -1.3  | 3.6  |              |
| 4   | Cg2705    | 1 | 1799.8367 | -3.3 | 333   | 347 | 0  | 55.3  | 27 | V | DQQATKDFVDWLFTS   | E | -0.6  | 3.6  |              |
| 4   | Cg2705    | 1 | 1820.8152 | -3.5 | 273   | 288 | 0  | 42.7  | 25 | A | AMVQNGNWAWSQISET  | S | -0.5  | 3.3  |              |
| 4   | Cg2705    | 2 | 1849.921  | -2.4 | 38    | 53  | 0  | 58.0  | 29 | L | NFKPEQDVAYQEIAKA  | Y | -0.9  | 4.44 |              |
| 4   | Cg2705    | 2 | 1852.8115 | -0.5 | 215   | 229 | 0  | 66.8  | 24 | I | WQEYQDKGVEDTNEI   | E | -1.8  | 3.5  |              |
| 4   | Cg2705    | 1 | 1871.9781 | -3.3 | 350   | 366 | 0  | 76.2  | 30 | A | GKEHVVKDLGFIAPFES | Y | 0.0   | 5.34 |              |
| 4   | Cg2705    | 1 | 1891.8588 | -0.6 | 211   | 226 | 0  | 75.3  | 27 | A | NAPIWQEYQDKGVEDT  | N | -1.4  | 3.58 |              |

| hit | accession | z | mass      | ppm  | start | end | mc | score | id | - | sequence                            | + | gravy | pl   | modification |
|-----|-----------|---|-----------|------|-------|-----|----|-------|----|---|-------------------------------------|---|-------|------|--------------|
| 4   | Cg2705    | 1 | 1897.8905 | -3.6 | 368   | 385 | 0  | 36.1  | 28 | Y | TAENTPNDPLSEQVAEAI                  | A | -0.7  | 2.88 |              |
| 4   | Cg2705    | 2 | 1936.9564 | -2.5 | 254   | 272 | 0  | 92.4  | 29 | S | LAPSKTVSDSMAEFAQQGA                 | A | -0.2  | 6.98 |              |
| 4   | Cg2705    | 1 | 1947.8698 | -3.0 | 367   | 384 | 0  | 41.3  | 24 | S | YTAENTPNDPLSEQVAEA                  | I | -1.0  | 2.88 |              |
| 4   | Cg2705    | 2 | 1973.9232 | -2.0 | 194   | 210 | 0  | 60.9  | 27 | A | STSLTSGEDWRWQTHLA                   | N | -0.9  | 5.22 |              |
| 4   | Cg2705    | 2 | 2003.9849 | -0.7 | 299   | 315 | 0  | 61.7  | 30 | I | KFLPMYMGLPDEEKHGI                   | N | -0.5  | 5.34 |              |
| 4   | Cg2705    | 2 | 2060.9538 | -0.5 | 367   | 385 | 0  | 36.4  | 27 | S | YTAENTPNDPLSEQVAEAI                 | A | -0.7  | 2.88 |              |
| 4   | Cg2705    | 2 | 2090.9738 | -0.5 | 386   | 402 | 0  | 75.9  | 28 | I | ANKDLTTYPWNFQYFPS                   | Q | -0.9  | 6.62 |              |
| 4   | Cg2705    | 2 | 2107.015  | -0.2 | 138   | 155 | 0  | 36.9  | 29 | V | EGFGIYNDEIFDKYIAT                   | S | 0.0   | 3.58 |              |
| 4   | Cg2705    | 2 | 2194.047  | -1.8 | 138   | 156 | 0  | 54.0  | 29 | V | EGFGIYNDEIFDKYIATS                  | G | 0.0   | 3.58 |              |
| 4   | Cg2705    | 2 | 2215.9546 | -1.9 | 215   | 232 | 0  | 56.2  | 22 | I | WQEYQDKGVEDTNEIEFS                  | Y | -1.6  | 3.44 |              |
| 4   | Cg2705    | 3 | 2217.0962 | 0.4  | 299   | 317 | 0  | 41.3  | 30 | I | KFLPMYMGLPDEEKHGINV                 | G | -0.4  | 5.34 |              |
| 4   | Cg2705    | 2 | 2227.1009 | -0.6 | 117   | 137 | 0  | 50.8  | 30 | L | TDDIPPLTTEDGEVRGVPFAV               | E | -0.2  | 3.42 |              |
| 4   | Cg2705    | 2 | 2248.0284 | -2.9 | 211   | 229 | 0  | 61.1  | 26 | A | NAPIWQEYQDKGVEDTNEI                 | E | -1.3  | 3.5  |              |
| 4   | Cg2705    | 2 | 2390.0712 | -1.9 | 88    | 108 | 0  | 26.4  | 25 | T | LFQVNGPAGFITWQDYMADMS               | D | 0.1   | 2.92 |              |
| 4   | Cg2705    | 2 | 2426.2329 | -1.7 | 114   | 135 | 0  | 67.6  | 30 | A | KQLTDDIPPLTTEDGEVRGVPF              | A | -0.6  | 3.84 |              |
| 4   | Cg2705    | 2 | 2596.3385 | -1.4 | 114   | 137 | 0  | 72.9  | 30 | A | KQLTDDIPPLTTEDGEVRGVPFAV            | E | -0.3  | 3.84 |              |
| 4   | Cg2705    | 2 | 2611.1714 | -0.7 | 211   | 232 | 0  | 49.0  | 25 | A | NAPIWQEYQDKGVEDTNEIEFS              | Y | -1.2  | 3.44 |              |
| 4   | Cg2705    | 2 | 2716.214  | -0.9 | 326   | 349 | 0  | 31.6  | 24 | V | NSEASEVDQQATKDFVDWLFTSEA            | G | -0.7  | 3.38 |              |
| 4   | Cg2705    | 2 | 2780.3902 | -1.7 | 167   | 191 | 0  | 51.1  | 31 | I | TSYQKLKEVAEDMQAKKDELGIEGA           | F | -0.9  | 4.44 |              |
| 4   | Cg2705    | 2 | 2905.2939 | -1.3 | 88    | 113 | 0  | 48.4  | 24 | T | LFQVNGPAGFITWQDYMADMSDTEVA          | K | 0.0   | 2.78 |              |
| 4   | Cg2705    | 2 | 3152.4826 | -2.6 | 356   | 384 | 0  | 50.3  | 29 | V | KDLGFIAPFESYTAENTPNDPLSEQVAEA       | I | -0.5  | 3.44 |              |
| 4   | Cg2705    | 2 | 3265.5666 | -1.6 | 356   | 385 | 0  | 47.9  | 30 | V | KDLGFIAPFESYTAENTPNDPLSEQVAEAI      | A | -0.4  | 3.44 |              |
| 4   | Cg2705    | 3 | 3365.5688 | -1.8 | 326   | 355 | 0  | 78.3  | 27 | V | NSEASEVDQQATKDFVDWLFTSEAGKEHVV      | K | -0.7  | 3.96 |              |
| 4   | Cg2705    | 3 | 3453.7184 | -3.1 | 161   | 191 | 0  | 90.9  | 31 | I | KSTDEITSYQKLKEVAEDMQAKKDELGIEGA     | F | -1.0  | 4.34 |              |
| 4   | Cg2705    | 2 | 3499.5997 | 1.5  | 386   | 414 | 0  | 42.0  | 26 | I | ANKDLTTYPWNFQYFPSQQFKDDFGQDLS       | Q | -1.1  | 3.88 |              |
| 4   | Cg2705    | 2 | 3612.6838 | -0.8 | 385   | 414 | 0  | 32.8  | 28 | A | IANKDLTTYPWNFQYFPSQQFKDDFGQDLS      | Q | -0.9  | 3.88 |              |
| 4   | Cg2705    | 2 | 3845.7441 | -4.1 | 79    | 113 | 0  | 39.7  | 24 | A | EIGKDEAPTLFQVNGPAGFITWQDYMADMSDTEVA | K | -0.3  | 3.28 |              |
| 4   | Cg2705    | 3 | 3861.7587 | -3.0 | 386   | 417 | 0  | 57.7  | 25 | I | ANKDLTTYPWNFQYFPSQQFKDDFGQDLSQYA    | S | -1.1  | 3.88 |              |
| 4   | Cg2705    | 2 | 3974.8428 | -0.2 | 385   | 417 | 0  | 42.0  | 27 | A | IANKDLTTYPWNFQYFPSQQFKDDFGQDLSQYA   | S | -0.9  | 3.88 |              |
| 5   | Cg3009    | 1 | 657.3697  | 0.5  | 24    | 29  | 0  | 38.0  | 32 | A | LQSIPT                              | L | 0.3   | 6.02 |              |
| 5   | Cg3009    | 1 | 664.3181  | -0.2 | 16    | 22  | 0  | 32.0  | 27 | T | FGGNIGT                             | A | 0.3   | 6.02 |              |
| 5   | Cg3009    | 1 | 672.4058  | 1.5  | 30    | 35  | 0  | 31.8  | 24 | T | LLDSIL                              | N | 1.9   | 3.1  |              |
| 5   | Cg3009    | 2 | 715.448   | 1.7  | 5     | 10  | 0  | 28.5  | 25 | S | LLKETL                              | G | 0.6   | 6.94 |              |
| 5   | Cg3009    | 2 | 728.4068  | 1.0  | 23    | 29  | 0  | 37.7  | 30 | T | ALQSIPT                             | L | 0.5   | 6.02 |              |
| 5   | Cg3009    | 1 | 757.4222  | 0.4  | 28    | 34  | 0  | 31.4  | 29 | I | PTLLDSI                             | L | 0.8   | 3.1  |              |
| 5   | Cg3009    | 1 | 786.3184  | -0.4 | 12    | 18  | 0  | 38.8  | 22 | G | NYETFGG                             | N | -1.0  | 3.3  |              |
| 5   | Cg3009    | 1 | 843.3399  | -0.7 | 11    | 18  | 0  | 33.9  | 21 | L | GNYETFGG                            | N | -0.9  | 3.3  |              |
| 5   | Cg3009    | 1 | 870.5062  | 0.2  | 27    | 34  | 0  | 44.5  | 27 | S | IPTLLDSI                            | L | 1.3   | 3.1  |              |
| 5   | Cg3009    | 1 | 870.5062  | -1.1 | 28    | 35  | 0  | 32.4  | 27 | I | PTLLDSIL                            | N | 1.2   | 3.1  |              |
| 5   | Cg3009    | 1 | 956.424   | -1.4 | 10    | 18  | 0  | 29.8  | 25 | T | LGNYETFGG                           | N | -0.4  | 3.3  |              |

| hit | accession | z | mass      | ppm  | start | end | mc | score | id | - | sequence            | + | gravy | pl   | modification |
|-----|-----------|---|-----------|------|-------|-----|----|-------|----|---|---------------------|---|-------|------|--------------|
| 5   | Cg3009    | 1 | 981.4039  | -0.5 | 49    | 57  | 0  | 27.0  | 23 | T | GENLDNFSS           | - | -1.0  | 3    |              |
| 5   | Cg3009    | 1 | 1044.4553 | -0.4 | 37    | 45  | 0  | 24.9  | 24 | N | FFDNFGDLA           | D | 0.3   | 2.92 |              |
| 5   | Cg3009    | 1 | 1070.4669 | -0.2 | 12    | 21  | 0  | 32.2  | 24 | G | NYETFGGNIG          | T | -0.6  | 3.3  |              |
| 5   | Cg3009    | 1 | 1080.5855 | -1.0 | 30    | 38  | 0  | 31.1  | 26 | T | LLDSILNFF           | D | 1.5   | 3.1  |              |
| 5   | Cg3009    | 1 | 1087.4611 | 1.0  | 36    | 44  | 0  | 37.6  | 23 | L | NFFDNFGDL           | A | -0.2  | 2.92 |              |
| 5   | Cg3009    | 1 | 1158.4982 | -0.1 | 36    | 45  | 0  | 39.5  | 22 | L | NFFDNFGDLA          | D | 0.0   | 2.92 |              |
| 5   | Cg3009    | 1 | 1171.5146 | 0.1  | 12    | 22  | 0  | 37.1  | 24 | G | NYETFGGNIGT         | A | -0.6  | 3.3  |              |
| 5   | Cg3009    | 1 | 1198.6809 | -1.1 | 24    | 34  | 0  | 33.3  | 27 | A | LQSIPTLLDSI         | L | 0.9   | 3.1  |              |
| 5   | Cg3009    | 2 | 1200.5452 | -0.4 | 35    | 44  | 0  | 25.7  | 25 | I | LNFFDNFGDL          | A | 0.2   | 2.92 |              |
| 5   | Cg3009    | 1 | 1228.536  | 0.1  | 11    | 22  | 0  | 30.3  | 23 | L | GNYETFGGNIGT        | A | -0.6  | 3.3  |              |
| 5   | Cg3009    | 1 | 1240.5724 | 0.5  | 10    | 21  | 0  | 30.1  | 26 | T | LGNYETFGGNIG        | T | -0.3  | 3.3  |              |
| 5   | Cg3009    | 1 | 1242.5517 | -1.2 | 12    | 23  | 0  | 46.2  | 25 | G | NYETFGGNIGTA        | L | -0.4  | 3.3  |              |
| 5   | Cg3009    | 2 | 1271.5823 | 0.1  | 35    | 45  | 0  | 74.8  | 26 | I | LNFFDNFGDLA         | D | 0.3   | 2.92 |              |
| 5   | Cg3009    | 2 | 1279.666  | 0.4  | 5     | 15  | 0  | 63.1  | 27 | S | LLKETLGNYET         | F | -0.6  | 4.26 |              |
| 5   | Cg3009    | 1 | 1298.5263 | -0.2 | 46    | 57  | 0  | 30.0  | 20 | A | DTTGENLDNFSS        | - | -1.2  | 2.88 |              |
| 5   | Cg3009    | 1 | 1299.5732 | -1.7 | 11    | 23  | 0  | 30.5  | 25 | L | GNYETFGGNIGTA       | L | -0.4  | 3.3  |              |
| 5   | Cg3009    | 1 | 1314.6092 | -1.1 | 7     | 18  | 0  | 60.6  | 26 | L | KETLGNYETFGG        | N | -1.0  | 4.26 |              |
| 5   | Cg3009    | 2 | 1341.6201 | 0.5  | 10    | 22  | 0  | 75.9  | 27 | T | LGNYETFGGNIGT       | A | -0.3  | 3.3  |              |
| 5   | Cg3009    | 1 | 1361.5776 | -0.4 | 37    | 48  | 0  | 35.8  | 23 | N | FFDNFGDLADTT        | G | -0.2  | 2.82 |              |
| 5   | Cg3009    | 2 | 1412.6572 | 0.7  | 10    | 23  | 0  | 44.9  | 27 | T | LGNYETFGGNIGTA      | L | -0.1  | 3.3  |              |
| 5   | Cg3009    | 1 | 1475.6205 | -1.1 | 36    | 48  | 0  | 34.3  | 21 | L | NFFDNFGDLADTT       | G | -0.4  | 2.82 |              |
| 5   | Cg3009    | 2 | 1487.6569 | 0.8  | 35    | 47  | 0  | 84.4  | 24 | I | LNFFDNFGDLADT       | T | -0.1  | 2.82 |              |
| 5   | Cg3009    | 2 | 1540.7773 | 0.4  | 5     | 18  | 0  | 89.7  | 29 | S | LLKETLGNYETFGG      | N | -0.3  | 4.26 |              |
| 5   | Cg3009    | 2 | 1586.7253 | 2.0  | 32    | 45  | 0  | 42.6  | 26 | L | DSILNFFDNFGDLA      | D | 0.3   | 2.82 |              |
| 5   | Cg3009    | 2 | 1588.7046 | 2.2  | 35    | 48  | 0  | 102.6 | 25 | I | LNFFDNFGDLADTT      | G | -0.1  | 2.82 |              |
| 5   | Cg3009    | 2 | 1598.7576 | 0.1  | 7     | 21  | 0  | 59.5  | 28 | L | KETLGNYETFGGNIG     | T | -0.7  | 4.26 |              |
| 5   | Cg3009    | 2 | 1627.8093 | 0.7  | 4     | 18  | 0  | 50.7  | 29 | L | SLLKETLGNYETFGG     | N | -0.3  | 4.26 |              |
| 5   | Cg3009    | 2 | 1699.8053 | 0.4  | 7     | 22  | 0  | 109.1 | 28 | L | KETLGNYETFGGNIGT    | A | -0.7  | 4.26 |              |
| 5   | Cg3009    | 2 | 1701.7886 | -0.2 | 34    | 48  | 0  | 31.7  | 27 | S | ILNFFDNFGDLADTT     | G | 0.2   | 2.82 |              |
| 5   | Cg3009    | 2 | 1770.8424 | 0.2  | 7     | 23  | 0  | 102.3 | 28 | L | KETLGNYETFGGNIGTA   | L | -0.6  | 4.26 |              |
| 5   | Cg3009    | 2 | 1802.7999 | 0.1  | 32    | 47  | 0  | 40.9  | 25 | L | DSILNFFDNFGDLADT    | T | 0.0   | 2.74 |              |
| 5   | Cg3009    | 2 | 1812.8934 | 2.3  | 30    | 45  | 0  | 101.6 | 29 | T | LLDSILNFFDNFGDLA    | D | 0.7   | 2.82 |              |
| 5   | Cg3009    | 2 | 1824.9258 | 0.4  | 5     | 21  | 0  | 56.0  | 29 | S | LLKETLGNYETFGGNIG   | T | -0.2  | 4.26 |              |
| 5   | Cg3009    | 2 | 1881.9109 | 0.1  | 12    | 29  | 0  | 45.0  | 29 | G | NYETFGGNIGTALQSIPT  | L | -0.2  | 3.3  |              |
| 5   | Cg3009    | 2 | 1883.9265 | 1.8  | 7     | 24  | 0  | 47.8  | 29 | L | KETLGNYETFGGNIGTAL  | Q | -0.3  | 4.26 |              |
| 5   | Cg3009    | 2 | 1903.8476 | 0.6  | 32    | 48  | 0  | 105.9 | 25 | L | DSILNFFDNFGDLADTT   | G | -0.1  | 2.74 |              |
| 5   | Cg3009    | 2 | 1925.9735 | -0.1 | 5     | 22  | 0  | 102.6 | 29 | S | LLKETLGNYETFGGNIGT  | A | -0.2  | 4.26 |              |
| 5   | Cg3009    | 2 | 1938.9323 | -1.1 | 11    | 29  | 0  | 38.8  | 29 | L | GNYETFGGNIGTALQSIPT | L | -0.2  | 3.3  |              |
| 5   | Cg3009    | 2 | 1997.0106 | -0.3 | 5     | 23  | 0  | 106.7 | 30 | S | LLKETLGNYETFGGNIGTA | L | -0.1  | 4.26 |              |
| 5   | Cg3009    | 2 | 2001.8956 | -2.4 | 35    | 52  | 0  | 29.7  | 25 | I | LNFFDNFGDLADTTGENL  | D | -0.3  | 2.78 |              |

| hit | accession | z | mass      | ppm  | start | end | mc | score | id | - | sequence                    | + | gravy | pl    | modification |
|-----|-----------|---|-----------|------|-------|-----|----|-------|----|---|-----------------------------|---|-------|-------|--------------|
| 5   | Cg3009    | 2 | 2011.9851 | -0.5 | 7     | 25  | 0  | 62.9  | 29 | L | KETLGNYETFGGNIGTALQ         | S | -0.5  | 4.26  |              |
| 5   | Cg3009    | 2 | 2013.0055 | -0.1 | 4     | 22  | 0  | 85.0  | 29 | L | LLKETLGNYETFGGNIGT          | A | -0.3  | 4.26  |              |
| 5   | Cg3009    | 2 | 2028.968  | 0.9  | 30    | 47  | 0  | 97.2  | 29 | T | LLDSILNFFDNFGDLADT          | T | 0.4   | 2.74  |              |
| 5   | Cg3009    | 2 | 2084.0426 | 0.1  | 4     | 23  | 0  | 65.9  | 29 | L | LLKETLGNYETFGGNIGTA         | L | -0.2  | 4.26  |              |
| 5   | Cg3009    | 2 | 2110.0946 | 0.1  | 5     | 24  | 0  | 85.2  | 30 | S | LLKETLGNYETFGGNIGTAL        | Q | 0.1   | 4.26  |              |
| 5   | Cg3009    | 2 | 2130.0157 | 0.6  | 30    | 48  | 0  | 112.1 | 29 | T | LLDSILNFFDNFGDLADTT         | G | 0.3   | 2.74  |              |
| 5   | Cg3009    | 2 | 2238.1532 | 0.0  | 5     | 25  | 0  | 107.9 | 30 | S | LLKETLGNYETFGGNIGTALQ       | S | -0.1  | 4.26  |              |
| 5   | Cg3009    | 2 | 2410.2016 | -0.3 | 7     | 29  | 0  | 79.7  | 30 | L | KETLGNYETFGGNIGTALQSIPT     | L | -0.4  | 4.26  |              |
| 5   | Cg3009    | 2 | 2452.2526 | 1.2  | 24    | 45  | 0  | 40.0  | 30 | A | LQSIPTLLDSILNFFDNFGDLA      | D | 0.6   | 2.82  |              |
| 5   | Cg3009    | 2 | 2552.098  | 0.2  | 35    | 57  | 0  | 47.7  | 21 | I | LNFFDNFGDLADTTGENLDFSS      | - | -0.5  | 2.72  |              |
| 5   | Cg3009    | 2 | 2624.3374 | -0.6 | 22    | 45  | 0  | 31.1  | 31 | G | TALQSIPTLLDSILNFFDNFGDLA    | D | 0.6   | 2.82  |              |
| 5   | Cg3009    | 2 | 2636.3697 | -0.9 | 5     | 29  | 0  | 62.5  | 30 | S | LLKETLGNYETFGGNIGTALQSIPT   | L | 0.0   | 4.26  |              |
| 5   | Cg3009    | 2 | 2840.412  | 0.3  | 23    | 48  | 0  | 42.1  | 30 | T | ALQSIPTLLDSILNFFDNFGDLADTT  | G | 0.4   | 2.74  |              |
| 5   | Cg3009    | 3 | 3093.4091 | -0.5 | 30    | 57  | 0  | 52.7  | 26 | T | LLDSILNFFDNFGDLADTTGENLDFSS | - | -0.1  | 2.66  |              |
| 6   | Cg2181    | 1 | 645.3122  | 0.2  | 362   | 366 | 0  | 25.4  | 25 | A | QELWA                       | Q | -0.5  | 3.3   |              |
| 6   | Cg2181    | 1 | 686.3275  | 0.9  | 528   | 532 | 0  | 24.2  | 22 | A | YYQIT                       | K | -0.5  | 5.86  |              |
| 6   | Cg2181    | 1 | 746.3446  | -0.7 | 87    | 93  | 0  | 30.9  | 30 | V | NDVAESI                     | E | -0.1  | 3     |              |
| 6   | Cg2181    | 1 | 774.3946  | -0.3 | 153   | 159 | 0  | 36.3  | 29 | S | MEGLQVV                     | D | 1.0   | 3.3   |              |
| 6   | Cg2181    | 1 | 872.4716  | -0.5 | 64    | 72  | 0  | 38.7  | 29 | V | GGGRIVDSI                   | F | 0.4   | 6.78  |              |
| 6   | Cg2181    | 1 | 906.4487  | 2.5  | 184   | 191 | 0  | 36.6  | 27 | A | FFPLPESA                    | F | 0.5   | 3.3   |              |
| 6   | Cg2181    | 1 | 950.4246  | -0.3 | 124   | 131 | 0  | 36.5  | 25 | V | NAWNYNVA                    | N | -0.6  | 5.92  |              |
| 6   | Cg2181    | 1 | 1008.4553 | 0.7  | 372   | 380 | 0  | 38.7  | 27 | I | SPWSGEFSI                   | S | -0.2  | 3.3   |              |
| 6   | Cg2181    | 2 | 1074.5305 | -0.7 | 316   | 324 | 0  | 33.6  | 29 | A | VNRDEITQT                   | I | -1.2  | 4.08  |              |
| 6   | Cg2181    | 1 | 1098.4942 | -0.2 | 341   | 351 | 0  | 32.1  | 25 | V | IDGHSDSLQGA                 | D | -0.5  | 3.88  |              |
| 6   | Cg2181    | 1 | 1108.5553 | 0.3  | 444   | 454 | 0  | 32.7  | 28 | G | NFLGPLYGTGA                 | G | 0.4   | 5.92  |              |
| 6   | Cg2181    | 2 | 1114.5731 | 0.0  | 277   | 287 | 0  | 29.0  | 28 | L | SGRSINQPSAV                 | F | -0.5  | 11.04 |              |
| 6   | Cg2181    | 1 | 1115.571  | -1.3 | 252   | 261 | 0  | 30.3  | 30 | A | DLLSDNLDVL                  | D | 0.5   | 2.82  |              |
| 6   | Cg2181    | 1 | 1123.5146 | -0.1 | 508   | 518 | 0  | 26.6  | 26 | A | VGGYSTNV DNV                | E | -0.1  | 3.1   |              |
| 6   | Cg2181    | 2 | 1131.4945 | 1.0  | 380   | 390 | 0  | 31.7  | 24 | S | ISYNADGGHQA                 | W | -0.8  | 4.94  |              |
| 6   | Cg2181    | 1 | 1177.5615 | -1.3 | 352   | 361 | 0  | 29.5  | 29 | A | DVLTYPERA                   | Q | -0.9  | 3.7   |              |
| 6   | Cg2181    | 1 | 1187.6146 | -1.0 | 316   | 325 | 0  | 50.3  | 29 | A | VNRDEITQTI                  | F | -0.7  | 4.08  |              |
| 6   | Cg2181    | 1 | 1201.5615 | -0.2 | 362   | 371 | 0  | 33.9  | 27 | A | QELWAQADEI                  | S | -0.7  | 2.94  |              |
| 6   | Cg2181    | 2 | 1360.6735 | -0.8 | 221   | 233 | 0  | 57.4  | 29 | T | IVPNADYTGGRQA               | Q | -0.5  | 6.7   |              |
| 6   | Cg2181    | 1 | 1365.6089 | -1.5 | 369   | 380 | 0  | 31.1  | 26 | A | DEISPWSGEFSI                | S | -0.3  | 2.94  |              |
| 6   | Cg2181    | 1 | 1369.5496 | -1.2 | 192   | 203 | 0  | 36.0  | 19 | A | FDDMDAFGENPI                | G | -0.5  | 2.78  |              |
| 6   | Cg2181    | 2 | 1377.6776 | -0.6 | 105   | 117 | 0  | 61.7  | 29 | T | IKDGQFTFDGTPV               | T | -0.6  | 3.88  |              |
| 6   | Cg2181    | 2 | 1381.6474 | 0.2  | 338   | 351 | 0  | 66.2  | 27 | T | SPVIDGHSDSLQGA              | D | -0.3  | 3.88  |              |
| 6   | Cg2181    | 2 | 1429.7161 | 0.0  | 59    | 72  | 0  | 78.5  | 28 | G | NTNEVGGGRIVDSI              | F | -0.3  | 4.08  |              |
| 6   | Cg2181    | 2 | 1436.646  | 1.5  | 368   | 380 | 0  | 36.4  | 26 | Q | ADEISPWSGEFSI               | S | -0.2  | 2.94  |              |
| 6   | Cg2181    | 1 | 1443.6729 | 0.4  | 255   | 268 | 0  | 29.6  | 27 | L | SDNLDVLD AIPDSA             | F | -0.1  | 2.74  |              |

| hit | accession | z | mass      | ppm  | start | end | mc | score | id | - | sequence                      | + | gravy | pl   | modification  |
|-----|-----------|---|-----------|------|-------|-----|----|-------|----|---|-------------------------------|---|-------|------|---------------|
| 6   | Cg2181    | 2 | 1461.7212 | -0.7 | 220   | 233 | 0  | 31.8  | 29 | A | TIVPNADYTGGRQA                | Q | -0.6  | 6.7  |               |
| 6   | Cg2181    | 2 | 1472.6783 | 0.3  | 269   | 281 | 0  | 77.2  | 27 | A | FSSFEDLSGRSI                  | N | -0.4  | 3.82 |               |
| 6   | Cg2181    | 2 | 1478.7253 | -2.6 | 104   | 117 | 0  | 41.6  | 29 | I | TIKDGQTFDTGTPV                | T | -0.6  | 3.88 |               |
| 6   | Cg2181    | 2 | 1489.6222 | -0.1 | 381   | 394 | 0  | 29.9  | 21 | I | SYNADGGHQAWVDA                | T | -0.8  | 3.88 |               |
| 6   | Cg2181    | 2 | 1543.7882 | 0.4  | 167   | 179 | 0  | 74.8  | 30 | V | ELTQPESDFPLRL                 | G | -0.7  | 3.82 |               |
| 6   | Cg2181    | 1 | 1549.6896 | -1.4 | 475   | 489 | 0  | 56.9  | 26 | A | NAADVDASTPLYNEA               | Q | -0.4  | 2.88 |               |
| 6   | Cg2181    | 2 | 1590.6699 | -0.4 | 381   | 395 | 0  | 51.0  | 21 | I | SYNADGGHQAWVDAT               | A | -0.8  | 3.88 |               |
| 6   | Cg2181    | 2 | 1624.7733 | 0.1  | 326   | 340 | 0  | 51.3  | 29 | I | FEGTRTPATDFTSPV               | I | -0.5  | 4.08 |               |
| 6   | Cg2181    | 2 | 1664.7642 | -0.8 | 271   | 285 | 0  | 45.7  | 27 | S | SFEDELSDRSINQPS               | A | -1.1  | 3.82 |               |
| 6   | Cg2181    | 2 | 1708.8268 | 0.5  | 338   | 354 | 0  | 68.1  | 29 | T | SPVIDGHSDSLQGADVL             | T | 0.0   | 3.6  |               |
| 6   | Cg2181    | 2 | 1737.8574 | -0.4 | 325   | 340 | 0  | 34.7  | 29 | T | IFEGTRTPATDFTSPV              | I | -0.2  | 4.08 |               |
| 6   | Cg2181    | 2 | 1741.7683 | 0.3  | 78    | 93  | 0  | 26.2  | 25 | V | YYDVDGSPVNDVAESI              | E | -0.3  | 2.78 |               |
| 6   | Cg2181    | 2 | 1744.7693 | -0.6 | 503   | 518 | 0  | 33.8  | 24 | T | WYSNAVGGYSTNVNDV              | E | -0.4  | 3.1  |               |
| 6   | Cg2181    | 2 | 1784.7489 | -0.1 | 455   | 471 | 0  | 50.6  | 21 | A | GSNDGDYSNPDFDAKLA             | E | -1.2  | 3.42 |               |
| 6   | Cg2181    | 1 | 1784.868  | -2.9 | 252   | 268 | 0  | 40.0  | 29 | A | DLLSDNLDVLD AIPDSA            | F | 0.2   | 2.68 |               |
| 6   | Cg2181    | 2 | 1834.8697 | -1.4 | 271   | 287 | 0  | 37.7  | 28 | S | SFEDELSDRSINQPSAV             | F | -0.6  | 3.82 |               |
| 6   | Cg2181    | 2 | 1845.8381 | -1.7 | 334   | 351 | 0  | 30.1  | 26 | A | TDFTSPVIDGHSDSLQGA            | D | -0.4  | 3.6  |               |
| 6   | Cg2181    | 2 | 1898.8646 | -1.1 | 269   | 285 | 0  | 32.2  | 26 | A | FSSFEDLSGRSINQPS              | A | -0.8  | 3.82 |               |
| 6   | Cg2181    | 1 | 1919.8748 | -4.0 | 475   | 492 | 0  | 47.9  | 26 | A | NAADVDASTPLYNEAEI             | L | -0.5  | 2.84 |               |
| 6   | Cg2181    | 2 | 2090.0055 | -1.1 | 249   | 268 | 0  | 34.5  | 29 | S | AYADLLSDNLDVLD AIPDSA         | F | 0.3   | 2.68 |               |
| 6   | Cg2181    | 2 | 2098.9306 | -1.0 | 192   | 210 | 0  | 62.2  | 25 | A | FDDMDAFGENPIGNPYKL            | Q | -0.7  | 3.5  |               |
| 6   | Cg2181    | 2 | 2114.9294 | -1.5 | 211   | 228 | 0  | 23.1  | 23 | L | QEWNHNQDATIVPNADYT            | G | -1.3  | 3.7  |               |
| 6   | Cg2181    | 2 | 2138.9797 | 0.7  | 288   | 306 | 0  | 27.7  | 27 | V | FQSFTIPESLEHFSGEEGV           | L | -0.3  | 3.78 |               |
| 6   | Cg2181    | 2 | 2173.0175 | -0.3 | 334   | 354 | 0  | 35.8  | 28 | A | TDFTSPVIDGHSDSLQGADVL         | T | -0.1  | 3.42 |               |
| 6   | Cg2181    | 2 | 2192.0062 | 0.8  | 362   | 380 | 0  | 57.8  | 27 | A | QELWAQADEISPWSGEFSI           | S | -0.4  | 2.88 |               |
| 6   | Cg2181    | 2 | 2257.9878 | -1.2 | 184   | 203 | 0  | 70.1  | 23 | A | FFPLPESAFDDMDAFGENPI          | G | -0.1  | 2.76 |               |
| 6   | Cg2181    | 2 | 2273.9827 | -2.2 | 184   | 203 | 0  | 28.7  | 22 | A | FFPLPESAFDDMDAFGENPI          | G | -0.1  | 2.76 | Oxidation (M) |
| 6   | Cg2181    | 2 | 2329.0249 | -3.1 | 183   | 203 | 0  | 69.4  | 23 | S | AFFPLPESAFDDMDAFGENPI         | G | 0.0   | 2.76 |               |
| 6   | Cg2181    | 2 | 2514.1286 | 1.0  | 78    | 100 | 0  | 146.9 | 25 | V | YYDVDGSPVNDVAESIELEGDKT       | Y | -0.7  | 3.28 |               |
| 6   | Cg2181    | 3 | 2584.1691 | -0.8 | 211   | 233 | 0  | 44.0  | 25 | L | QEWNHNQDATIVPNADYTGGRQA       | Q | -1.4  | 4.3  |               |
| 6   | Cg2181    | 2 | 2633.3045 | -0.1 | 47    | 72  | 0  | 44.7  | 31 | V | NGTEPQNPLVPGNTNEVGGGRIVDSI    | F | -0.6  | 3.82 |               |
| 6   | Cg2181    | 3 | 2705.2569 | 1.7  | 326   | 351 | 0  | 29.4  | 28 | I | FEGTRTPATDFTSPVIDGHSDSLQGA    | D | -0.5  | 3.96 |               |
| 6   | Cg2181    | 3 | 2818.341  | -1.5 | 325   | 351 | 0  | 31.6  | 29 | T | IFEGTRTPATDFTSPVIDGHSDSLQGA   | D | -0.3  | 3.96 |               |
| 6   | Cg2181    | 2 | 2875.2937 | -0.9 | 444   | 471 | 0  | 78.5  | 25 | G | NFLGPLYGTGAGSNDGDYSNPDFDAKLA  | E | -0.6  | 3.42 |               |
| 6   | Cg2181    | 2 | 2987.3688 | 2.8  | 184   | 210 | 0  | 44.9  | 27 | A | FFPLPESAFDDMDAFGENPIGNPYKL    | Q | -0.3  | 3.42 |               |
| 6   | Cg2181    | 3 | 3032.4364 | -2.2 | 326   | 354 | 0  | 47.1  | 29 | I | FEGTRTPATDFTSPVIDGHSDSLQGADVL | T | -0.3  | 3.76 |               |
| 7   | Cg2120    | 1 | 553.3839  | 1.1  | 462   | 466 | 0  | 26.4  | 24 | V | VIIPL                         | L | 3.1   | 6.02 |               |
| 7   | Cg2120    | 1 | 640.4523  | -0.9 | 504   | 509 | 0  | 28.6  | 25 | A | ILLGII                        | L | 3.5   | 6.02 |               |
| 7   | Cg2120    | 1 | 651.3665  | 0.6  | 476   | 480 | 0  | 24.1  | 17 | V | MYLLL                         | G | 2.4   | 5.92 |               |
| 7   | Cg2120    | 1 | 703.3541  | 1.1  | 516   | 522 | 0  | 30.0  | 30 | C | FDLGGPV                       | N | 0.7   | 3.1  |               |

| hit | accession | z | mass      | ppm  | start | end | mc | score | id | - | sequence                  | + | gravy | pl    | modification |
|-----|-----------|---|-----------|------|-------|-----|----|-------|----|---|---------------------------|---|-------|-------|--------------|
| 7   | Cg2120    | 1 | 741.3697  | 1.3  | 526   | 532 | 0  | 35.1  | 24 | A | AYLFGTA                   | G | 1.1   | 5.92  |              |
| 7   | Cg2120    | 1 | 758.4327  | 1.3  | 581   | 587 | 0  | 52.4  | 27 | S | SWLLGLA                   | F | 1.6   | 6.02  |              |
| 7   | Cg2120    | 1 | 767.5157  | 0.9  | 462   | 468 | 0  | 20.0  | 19 | V | VIIPLLT                   | S | 2.6   | 6.02  |              |
| 7   | Cg2120    | 1 | 796.4517  | 1.0  | 552   | 559 | 0  | 25.1  | 22 | A | GMVPPIAL                  | S | 1.6   | 6.02  |              |
| 7   | Cg2120    | 2 | 835.4188  | -0.6 | 31    | 38  | 0  | 45.9  | 29 | V | IFDAGRAS                  | S | 0.2   | 6.78  |              |
| 7   | Cg2120    | 2 | 907.5239  | 0.3  | 406   | 415 | 0  | 33.7  | 23 | A | LAGRPGIAPG                | F | 0.3   | 11.04 |              |
| 7   | Cg2120    | 1 | 910.476   | -1.1 | 150   | 158 | 0  | 33.7  | 24 | N | PAPKTTEPA                 | A | -1.1  | 6.94  |              |
| 7   | Cg2120    | 1 | 911.4753  | 0.0  | 526   | 534 | 0  | 33.4  | 28 | A | AYLFGTAGL                 | S | 1.2   | 5.92  |              |
| 7   | Cg2120    | 1 | 912.4415  | -0.1 | 316   | 323 | 0  | 39.3  | 26 | V | SYMVPFVA                  | A | 1.4   | 5.92  |              |
| 7   | Cg2120    | 2 | 939.5389  | -0.6 | 147   | 155 | 0  | 33.7  | 26 | A | VLNPAPKTT                 | E | -0.2  | 10.1  |              |
| 7   | Cg2120    | 2 | 984.5393  | 0.3  | 599   | 607 | 0  | 29.0  | 28 | A | ADPFRVIPA                 | M | 0.4   | 6.78  |              |
| 7   | Cg2120    | 1 | 1107.5601 | -2.6 | 588   | 598 | 0  | 31.9  | 28 | A | FVSEGAIPFAA               | A | 1.2   | 3.3   |              |
| 7   | Cg2120    | 1 | 1122.5016 | -0.7 | 490   | 499 | 0  | 28.0  | 27 | T | GLQDWLSSMS                | G | -0.1  | 3.1   |              |
| 7   | Cg2120    | 2 | 1125.603  | 0.1  | 145   | 155 | 0  | 80.0  | 27 | V | DAVLNPAPKTT               | E | -0.4  | 6.76  |              |
| 7   | Cg2120    | 1 | 1131.5659 | -2.8 | 135   | 144 | 0  | 31.6  | 29 | A | TTEQEIVDVV                | D | 0.2   | 2.94  |              |
| 7   | Cg2120    | 2 | 1137.603  | -1.0 | 148   | 158 | 0  | 56.6  | 27 | V | LNPAPKTTEPA               | A | -0.9  | 6.94  |              |
| 7   | Cg2120    | 1 | 1138.6598 | -1.8 | 219   | 229 | 0  | 31.5  | 23 | S | SAVTPVDPKII               | E | 0.6   | 6.76  |              |
| 7   | Cg2120    | 1 | 1198.583  | -0.5 | 355   | 366 | 0  | 28.6  | 28 | T | NLPGNTVDVDGV              | A | -0.1  | 2.92  |              |
| 7   | Cg2120    | 1 | 1205.5201 | -2.0 | 87    | 98  | 0  | 47.0  | 24 | V | DFSGPDGDANLV              | F | -0.4  | 2.82  |              |
| 7   | Cg2120    | 1 | 1229.5961 | -2.8 | 263   | 273 | 0  | 35.8  | 27 | A | INEPAKMIDEA               | I | -0.5  | 3.82  |              |
| 7   | Cg2120    | 2 | 1236.6714 | -0.2 | 147   | 158 | 0  | 46.3  | 26 | A | VLNPAPKTTEPA              | A | -0.5  | 6.94  |              |
| 7   | Cg2120    | 1 | 1336.6333 | -2.7 | 486   | 497 | 0  | 28.1  | 28 | A | SIMTGLQDWLSS              | M | 0.2   | 3.1   |              |
| 7   | Cg2120    | 2 | 1409.7766 | 1.2  | 219   | 232 | 0  | 41.9  | 25 | S | SAVTPVDPKIIIEAA           | D | 0.5   | 4.08  |              |
| 7   | Cg2120    | 2 | 1410.7719 | 1.3  | 216   | 229 | 0  | 29.5  | 27 | T | QGSSAVTPVDPKII            | E | 0.2   | 6.76  |              |
| 7   | Cg2120    | 1 | 1416.6984 | 0.0  | 135   | 147 | 0  | 35.9  | 29 | A | TTEQEIVDVDAV              | L | 0.3   | 2.84  |              |
| 7   | Cg2120    | 1 | 1422.7354 | -2.2 | 145   | 158 | 0  | 40.6  | 28 | V | DAVLNPAPKTTEPA            | A | -0.5  | 4.08  |              |
| 7   | Cg2120    | 2 | 1444.7157 | 0.1  | 39    | 52  | 0  | 65.1  | 29 | S | SADALAKDALDREA            | K | -0.5  | 3.96  |              |
| 7   | Cg2120    | 1 | 1484.7544 | -2.4 | 263   | 276 | 0  | 29.5  | 28 | A | INEPAKMIDEAIAA            | S | 0.2   | 3.82  |              |
| 7   | Cg2120    | 2 | 1489.7049 | 0.2  | 84    | 98  | 0  | 63.3  | 28 | S | KGVDGDFSGPDGDANLV         | F | -0.3  | 3.6   |              |
| 7   | Cg2120    | 2 | 1551.7417 | 0.5  | 11    | 24  | 0  | 103.8 | 29 | V | RLDVDFGDSTTDVI            | N | -0.1  | 3.42  |              |
| 7   | Cg2120    | 2 | 1576.7369 | 0.0  | 83    | 98  | 0  | 42.8  | 28 | L | SKGVDFSGPDGDANLV          | F | -0.3  | 3.6   |              |
| 7   | Cg2120    | 2 | 1694.9091 | -0.5 | 219   | 235 | 0  | 40.0  | 28 | S | SAVTPVDPKIIIEAADAV        | I | 0.6   | 3.7   |              |
| 7   | Cg2120    | 2 | 1759.8224 | -0.2 | 197   | 212 | 0  | 58.7  | 27 | A | DSLQNAEGRDDVELV           | V | -0.8  | 3.42  |              |
| 7   | Cg2120    | 2 | 1845.9221 | -1.5 | 81    | 98  | 0  | 66.1  | 30 | A | RLSKGVDFSGPDGDANLV        | F | -0.3  | 4.18  |              |
| 7   | Cg2120    | 2 | 2037.063  | 0.3  | 135   | 153 | 0  | 39.0  | 29 | A | TTEQEIVDVDAVLNPAPK        | T | 0.0   | 3.58  |              |
| 7   | Cg2120    | 2 | 2239.1584 | -1.4 | 135   | 155 | 0  | 82.1  | 30 | A | TTEQEIVDVDAVLNPAPKTT      | E | -0.1  | 3.58  |              |
| 7   | Cg2120    | 2 | 2355.203  | -0.9 | 39    | 62  | 0  | 41.5  | 30 | S | SADALAKDALDREAKSGTGVPQQV  | A | -0.4  | 4.46  |              |
| 7   | Cg2120    | 2 | 2536.2908 | -3.0 | 135   | 158 | 0  | 56.6  | 30 | A | TTEQEIVDVDAVLNPAPKTTEPA   | A | -0.2  | 3.5   |              |
| 7   | Cg2120    | 2 | 2597.261  | -1.1 | 14    | 38  | 0  | 75.7  | 30 | D | VDFGDSTTDVINNLATVIFDAGRAS | S | 0.3   | 3.42  |              |
| 7   | Cg2120    | 2 | 2680.3807 | -1.7 | 131   | 155 | 0  | 82.2  | 31 | A | LQEATTEQEIVDVDAVLNPAPKTT  | E | -0.1  | 3.5   |              |

| hit | accession | z | mass      | ppm  | start | end | mc | score | id | - | sequence                     | + | gravy | pl   | modification |
|-----|-----------|---|-----------|------|-------|-----|----|-------|----|---|------------------------------|---|-------|------|--------------|
| 7   | Cg2120    | 2 | 2712.2879 | -2.1 | 13    | 38  | 0  | 99.4  | 29 | L | DVDFGDSTTDVINNLATVIFDAGRAS   | S | 0.1   | 3.3  |              |
| 7   | Cg2120    | 2 | 2977.5132 | -1.8 | 131   | 158 | 0  | 64.8  | 31 | A | LQEATTEQEIVDVAVLNLPAPKTTEPA  | A | -0.2  | 3.44 |              |
| 7   | Cg2120    | 2 | 2981.4731 | -0.7 | 11    | 38  | 0  | 68.2  | 31 | V | RLDVDFGDSTTDVINNLATVIFDAGRAS | S | 0.1   | 3.7  |              |
| 8   | Cg2911    | 1 | 551.3683  | 2.2  | 9     | 13  | 0  | 25.9  | 18 | L | PILPL                        | V | 1.8   | 6.02 |              |
| 8   | Cg2911    | 1 | 765.5     | -1.6 | 7     | 13  | 0  | 23.3  | 13 | W | TLPLPL                       | V | 1.7   | 6.02 |              |
| 8   | Cg2911    | 2 | 791.3813  | 0.4  | 259   | 265 | 0  | 31.3  | 30 | L | IYNPQSA                      | S | -0.6  | 5.92 |              |
| 8   | Cg2911    | 1 | 858.4698  | 0.5  | 84    | 91  | 0  | 29.1  | 29 | V | SEADIIIV                     | G | 1.5   | 3    |              |
| 8   | Cg2911    | 1 | 921.4443  | -0.8 | 164   | 171 | 0  | 32.2  | 29 | V | AEEFAEKV                     | T | -0.5  | 3.96 |              |
| 8   | Cg2911    | 1 | 972.44    | -0.4 | 172   | 180 | 0  | 26.7  | 24 | V | TELDPEAQA                    | D | -1.0  | 2.94 |              |
| 8   | Cg2911    | 1 | 1076.5139 | -1.1 | 41    | 50  | 0  | 34.4  | 29 | V | TSTQWADVA                    | E | 0.2   | 3.1  |              |
| 8   | Cg2911    | 1 | 1088.535  | -4.4 | 103   | 111 | 0  | 33.5  | 29 | G | TLEDDDRII                    | H | -0.7  | 3.5  |              |
| 8   | Cg2911    | 1 | 1192.5612 | -1.6 | 284   | 293 | 0  | 45.7  | 29 | V | VEIYETPQNT                   | E | -1.0  | 3.12 |              |
| 8   | Cg2911    | 1 | 1236.5874 | -0.6 | 161   | 171 | 0  | 40.5  | 29 | V | SEVAEEFAEKV                  | T | -0.4  | 3.8  |              |
| 8   | Cg2911    | 1 | 1254.6707 | -2.2 | 53    | 64  | 0  | 35.7  | 27 | A | VAPDVEIAIIT                  | G | 1.1   | 2.88 |              |
| 8   | Cg2911    | 2 | 1256.531  | 0.0  | 65    | 76  | 0  | 43.3  | 23 | T | GGDIDPHSFEPS                 | A | -1.0  | 3.7  |              |
| 8   | Cg2911    | 1 | 1259.5517 | -2.6 | 172   | 183 | 0  | 37.4  | 24 | V | TELDPEAQADAT                 | A | -0.9  | 2.84 |              |
| 8   | Cg2911    | 1 | 1276.5936 | 1.3  | 41    | 52  | 0  | 28.4  | 28 | V | TSTQWADVAEA                  | V | 0.0   | 3    |              |
| 8   | Cg2911    | 2 | 1353.5871 | -1.0 | 219   | 230 | 0  | 35.0  | 25 | S | DMVESTPEGYRA                 | T | -1.0  | 3.82 |              |
| 8   | Cg2911    | 1 | 1397.7766 | 0.0  | 271   | 283 | 0  | 58.5  | 28 | T | SLKDLAEEKGIPV                | V | -0.2  | 4.44 |              |
| 8   | Cg2911    | 2 | 1454.6347 | 0.4  | 219   | 231 | 0  | 25.2  | 25 | S | DMVESTPEGYRAT                | T | -1.0  | 3.82 |              |
| 8   | Cg2911    | 1 | 1519.7155 | -0.7 | 245   | 258 | 0  | 31.0  | 28 | A | SFQDAINNGDLVDL               | I | -0.1  | 2.82 |              |
| 8   | Cg2911    | 2 | 1678.7257 | -0.8 | 217   | 231 | 0  | 46.1  | 23 | S | HSDMVESTPEGYRAT              | T | -1.1  | 4.42 |              |
| 8   | Cg2911    | 2 | 1738.9716 | 0.6  | 271   | 286 | 0  | 59.1  | 26 | T | SLKDLAEEKGIPVVEI             | Y | 0.1   | 4.16 |              |
| 8   | Cg2911    | 2 | 1755.7985 | -1.6 | 218   | 233 | 0  | 48.0  | 27 | H | SDMVESTPEGYRATTL             | S | -0.6  | 3.82 |              |
| 8   | Cg2911    | 2 | 1775.8578 | 1.7  | 55    | 71  | 0  | 47.7  | 29 | A | PDVDIEAIITGGDIDPH            | S | -0.1  | 3.36 |              |
| 8   | Cg2911    | 1 | 1839.8891 | -2.4 | 294   | 310 | 0  | 48.9  | 29 | T | ENFLDAFTKAVDDLTAAT           | T | 0.1   | 3.5  |              |
| 8   | Cg2911    | 2 | 1878.8418 | 0.1  | 215   | 231 | 0  | 35.9  | 25 | I | LSHSDMVESTPEGYRAT            | T | -0.8  | 4.42 |              |
| 8   | Cg2911    | 2 | 1940.9367 | -0.6 | 294   | 311 | 0  | 69.3  | 29 | T | ENFLDAFTKAVDDLTAAT           | N | 0.1   | 3.5  |              |
| 8   | Cg2911    | 2 | 1945.9633 | 0.9  | 53    | 71  | 0  | 116.4 | 30 | A | VAPDVEIAIITGGDIDPH           | S | 0.2   | 3.36 |              |
| 8   | Cg2911    | 2 | 2028.0574 | -2.3 | 188   | 204 | 0  | 92.0  | 30 | T | KMDELHNQIHDLPAVRI            | A | -0.6  | 6.02 |              |
| 8   | Cg2911    | 2 | 2099.0946 | 1.2  | 188   | 205 | 0  | 40.2  | 30 | T | KMDELHNQIHDLPAVRIA           | N | -0.4  | 6.02 |              |
| 8   | Cg2911    | 2 | 2156.0273 | -0.6 | 292   | 311 | 0  | 91.5  | 29 | Q | NTENFLDAFTKAVDDLTAAT         | N | -0.2  | 3.5  |              |
| 8   | Cg2911    | 2 | 2191.0168 | 0.5  | 161   | 180 | 0  | 39.6  | 27 | V | SEVAEEFAEKVTELDPEAQA         | D | -0.6  | 3.44 |              |
| 8   | Cg2911    | 2 | 2200.9913 | -1.1 | 92    | 111 | 0  | 118.7 | 26 | V | GGGGYDSWLYGTLEDDDRII         | H | -0.6  | 3.36 |              |
| 8   | Cg2911    | 2 | 2282.1067 | -1.1 | 294   | 314 | 0  | 89.9  | 30 | T | ENFLDAFTKAVDDLTAATNQQV       | - | -0.1  | 3.5  |              |
| 8   | Cg2911    | 2 | 2329.1114 | 1.1  | 284   | 303 | 0  | 69.9  | 29 | V | VEIYETPQNTENFLDAFTKA         | V | -0.6  | 3.68 |              |
| 8   | Cg2911    | 3 | 2400.2583 | -0.9 | 184   | 204 | 0  | 64.6  | 30 | T | AVTTKMDELHNQIHDLPAVRI        | A | -0.2  | 6.02 |              |
| 8   | Cg2911    | 2 | 2471.2955 | 0.3  | 184   | 205 | 0  | 40.8  | 30 | T | AVTTKMDELHNQIHDLPAVRIA       | Q | -0.1  | 6.02 |              |
| 8   | Cg2911    | 2 | 2493.1911 | -1.2 | 53    | 76  | 0  | 29.3  | 29 | A | VAPDVEIAIITGGDIDPHSFEPS      | A | 0.0   | 3.32 |              |
| 8   | Cg2911    | 2 | 2497.1973 | -2.6 | 292   | 314 | 0  | 93.8  | 29 | Q | NTENFLDAFTKAVDDLTAATNQQV     | - | -0.3  | 3.5  |              |



| hit | accession | z | mass      | ppm  | start | end | mc | score | id | - | sequence                        | + | gravy | pl   | modification |
|-----|-----------|---|-----------|------|-------|-----|----|-------|----|---|---------------------------------|---|-------|------|--------------|
| 8   | Cg2911    | 2 | 2665.2759 | -3.2 | 53    | 78  | 0  | 61.5  | 29 | A | VAPDVEIAITGGDIDPHSFEPSAT        | D | 0.1   | 3.32 |              |
| 8   | Cg2911    | 2 | 2673.2446 | 0.0  | 287   | 310 | 0  | 35.8  | 28 | I | YETPQNTENFLDAFTKAVDDLTA         | T | -0.5  | 3.42 |              |
| 8   | Cg2911    | 2 | 2770.2708 | -1.8 | 156   | 180 | 0  | 38.2  | 26 | Y | STEYVSEVAEEFAEKVTELDPEAQA       | D | -0.6  | 3.38 |              |
| 8   | Cg2911    | 2 | 2853.3239 | -1.0 | 205   | 230 | 0  | 83.8  | 27 | I | AQTEPIADHILSHSDMVESTPEGYRA      | T | -0.6  | 4.28 |              |
| 8   | Cg2911    | 2 | 2954.3716 | -4.2 | 205   | 231 | 0  | 68.3  | 27 | I | AQTEPIADHILSHSDMVESTPEGYRAT     | T | -0.6  | 4.28 |              |
| 8   | Cg2911    | 2 | 3168.5033 | -3.0 | 205   | 233 | 0  | 79.9  | 29 | I | AQTEPIADHILSHSDMVESTPEGYRATTL   | S | -0.5  | 4.28 |              |
| 8   | Cg2911    | 2 | 3456.6573 | -1.0 | 284   | 314 | 0  | 61.3  | 30 | V | VEIYETPQNTENFLDAFTKAVDDLTAATNQV | - | -0.4  | 3.38 |              |
| 9   | Cg2925    | 1 | 551.3683  | 2.2  | 116   | 120 | 0  | 25.9  | 18 | V | PLIPI                           | L | 1.9   | 6.02 |              |
| 9   | Cg2925    | 1 | 600.302   | 1.3  | 555   | 560 | 0  | 26.2  | 23 | S | GHAFAV                          | R | 1.2   | 7.84 |              |
| 9   | Cg2925    | 1 | 628.3544  | -0.3 | 131   | 136 | 0  | 43.3  | 28 | I | NNVLA                           | Q | 1.2   | 6.02 |              |
| 9   | Cg2925    | 1 | 641.3748  | -0.5 | 539   | 544 | 0  | 39.5  | 29 | G | QLVSPV                          | S | 1.1   | 6.02 |              |
| 9   | Cg2925    | 1 | 642.3701  | -2.6 | 647   | 652 | 0  | 37.8  | 29 | A | NLLNVA                          | K | 1.1   | 6.02 |              |
| 9   | Cg2925    | 1 | 702.3952  | 0.9  | 112   | 117 | 0  | 28.2  | 24 | A | DIFVPL                          | I | 1.7   | 3.1  |              |
| 9   | Cg2925    | 1 | 733.401   | -1.0 | 221   | 227 | 0  | 34.5  | 29 | S | LFGLDVA                         | Q | 1.8   | 3.1  |              |
| 9   | Cg2925    | 1 | 764.3891  | -0.1 | 58    | 64  | 0  | 29.4  | 25 | T | GGMFQII                         | V | 1.3   | 6.02 |              |
| 9   | Cg2925    | 1 | 803.4429  | 0.5  | 261   | 267 | 0  | 40.0  | 25 | A | DFLITPV                         | L | 1.4   | 3.1  |              |
| 9   | Cg2925    | 1 | 826.4913  | -0.6 | 537   | 544 | 0  | 41.7  | 27 | T | KGQLVSPV                        | S | 0.3   | 10.1 |              |
| 9   | Cg2925    | 1 | 836.3916  | -1.1 | 74    | 80  | 0  | 38.4  | 29 | V | FKELDDA                         | T | -0.9  | 3.7  |              |
| 9   | Cg2925    | 1 | 866.4174  | 1.5  | 299   | 306 | 0  | 29.4  | 26 | G | LYDFGGPV                        | G | 0.5   | 3.1  |              |
| 9   | Cg2925    | 2 | 893.4243  | 0.4  | 65    | 73  | 0  | 47.8  | 29 | I | VGPGDVDHV                       | F | 0.0   | 3.88 |              |
| 9   | Cg2925    | 1 | 918.427   | -0.3 | 574   | 581 | 0  | 50.1  | 29 | L | MHIGFDTV                        | N | 0.7   | 4.94 |              |
| 9   | Cg2925    | 1 | 930.5022  | -1.0 | 89    | 96  | 0  | 51.5  | 29 | S | TEQLKDVV                        | A | -0.4  | 4.08 |              |
| 9   | Cg2925    | 1 | 942.5572  | -0.2 | 121   | 130 | 0  | 27.1  | 27 | I | LVGGLLMAI                       | N | 2.3   | 6.02 |              |
| 9   | Cg2925    | 1 | 1003.4975 | -0.2 | 137   | 145 | 0  | 32.7  | 30 | A | QDLFGPQSL                       | V | -0.3  | 3.1  |              |
| 9   | Cg2925    | 1 | 1065.4978 | -0.9 | 635   | 644 | 0  | 29.2  | 28 | V | NTYGLGEIEA                      | G | -0.3  | 3.12 |              |
| 9   | Cg2925    | 1 | 1072.6321 | -1.5 | 165   | 174 | 0  | 42.9  | 25 | S | APFAFLPVLV                      | G | 2.2   | 6.02 |              |
| 9   | Cg2925    | 1 | 1076.5754 | -0.7 | 616   | 625 | 0  | 29.1  | 28 | A | GYEVTTPIVV                      | S | 0.9   | 3.3  |              |
| 9   | Cg2925    | 1 | 1109.4344 | -0.1 | 211   | 220 | 0  | 23.0  | 20 | T | MAAGEMPMWS                      | L | 0.2   | 3.3  |              |
| 9   | Cg2925    | 1 | 1115.5822 | 0.1  | 89    | 98  | 0  | 32.6  | 29 | S | TEQLKDVVAN                      | N | -0.5  | 4.08 |              |
| 9   | Cg2925    | 1 | 1159.5721 | -0.4 | 563   | 573 | 0  | 39.8  | 29 | T | KAEDGSNVDIL                     | M | -0.4  | 3.7  |              |
| 9   | Cg2925    | 1 | 1193.5564 | -0.4 | 635   | 646 | 0  | 33.0  | 28 | V | NTYGLGEIEAGA                    | N | -0.2  | 3.12 |              |
| 9   | Cg2925    | 1 | 1199.6146 | 0.5  | 11    | 21  | 0  | 51.0  | 28 | I | LRDIGGEDNIV                     | A | -0.2  | 3.7  |              |
| 9   | Cg2925    | 1 | 1209.7373 | -2.8 | 110   | 120 | 0  | 27.7  | 22 | V | LADIFVPLIPI                     | L | 2.1   | 3.1  |              |
| 9   | Cg2925    | 2 | 1270.6517 | -0.4 | 11    | 22  | 0  | 34.1  | 29 | I | LRDIGGEDNIVA                    | A | 0.0   | 3.7  |              |
| 9   | Cg2925    | 2 | 1300.6623 | -0.5 | 89    | 100 | 0  | 29.4  | 29 | S | TEQLKDVVANNA                    | N | -0.5  | 4.08 |              |
| 9   | Cg2925    | 2 | 1376.7162 | -0.1 | 160   | 172 | 0  | 48.6  | 28 | I | NLMASAPFAFLPV                   | L | 1.3   | 6.02 |              |
| 9   | Cg2925    | 2 | 1387.6943 | -2.0 | 88    | 100 | 0  | 39.4  | 29 | V | STEQLKDVVANNA                   | N | -0.5  | 4.08 |              |
| 9   | Cg2925    | 1 | 1421.8898 | -2.8 | 110   | 122 | 0  | 18.3  | 18 | V | LADIFVPLIPILV                   | G | 2.4   | 3.1  |              |
| 9   | Cg2925    | 2 | 1429.699  | 1.2  | 293   | 306 | 0  | 70.8  | 29 | L | AHGLQGLYDFGGPV                  | G | 0.1   | 4.94 |              |
| 9   | Cg2925    | 2 | 1551.6941 | 0.3  | 44    | 57  | 0  | 59.0  | 26 | Q | SLDDDPDLKGTFT                   | G | -1.1  | 3.36 |              |

| hit | accession | z | mass      | ppm  | start | end | mc | score | id | - | sequence              | + | gravy | pl   | modification  |
|-----|-----------|---|-----------|------|-------|-----|----|-------|----|---|-----------------------|---|-------|------|---------------|
| 9   | Cg2925    | 2 | 1637.8148 | -0.2 | 74    | 88  | 0  | 51.1  | 29 | V | FKELDDATSKDIAVS       | T | -0.3  | 3.96 |               |
| 9   | Cg2925    | 2 | 1639.8029 | 0.9  | 58    | 73  | 0  | 40.0  | 28 | T | GGMFQIIVGPGDVDHV      | F | 0.6   | 3.88 |               |
| 9   | Cg2925    | 1 | 1712.9097 | -2.0 | 131   | 146 | 0  | 35.4  | 29 | I | NNVLVAQDLFGPQSLV      | E | 0.5   | 3.1  |               |
| 9   | Cg2925    | 2 | 1934.9448 | -2.5 | 137   | 153 | 0  | 70.1  | 29 | A | QDLFGPQSLVEMFPQIS     | G | 0.1   | 3    |               |
| 9   | Cg2925    | 2 | 1950.9397 | -0.9 | 137   | 153 | 0  | 73.3  | 29 | A | QDLFGPQSLVEMFPQIS     | G | 0.1   | 3    | Oxidation (M) |
| 9   | Cg2925    | 2 | 2430.222  | -2.5 | 321   | 342 | 0  | 41.6  | 31 | I | TGLHQSFPIELFLFNQGGFSI | F | 0.1   | 4.24 |               |
| 10  | Cg2409    | 1 | 557.3247  | 0.2  | 225   | 229 | 0  | 33.4  | 19 | V | MVLPV                 | N | 2.5   | 6.02 |               |
| 10  | Cg2409    | 1 | 774.3371  | -2.5 | 44    | 50  | 0  | 31.2  | 20 | R | MGWPDGI               | T | -0.1  | 3.1  |               |
| 10  | Cg2409    | 1 | 777.3909  | -0.5 | 270   | 275 | 0  | 32.7  | 30 | V | FQIEEI                | T | 0.2   | 3.12 |               |
| 10  | Cg2409    | 1 | 930.4382  | -0.9 | 43    | 50  | 0  | 39.3  | 27 | L | RMGWPDGI              | T | -0.6  | 6.78 |               |
| 10  | Cg2409    | 1 | 936.4745  | -1.2 | 246   | 252 | 0  | 28.5  | 27 | S | FWVPEFL               | F | 1.1   | 3.3  |               |
| 10  | Cg2409    | 1 | 974.5073  | -0.2 | 104   | 111 | 0  | 32.2  | 30 | L | QYNVPLEL              | V | -0.2  | 3.3  |               |
| 10  | Cg2409    | 2 | 985.508   | -1.2 | 137   | 145 | 0  | 29.9  | 28 | T | ALDKNPEVT             | V | -0.8  | 4.08 |               |
| 10  | Cg2409    | 1 | 1073.5757 | 0.5  | 104   | 112 | 0  | 34.8  | 30 | L | QYNVPLELV             | L | 0.3   | 3.3  |               |
| 10  | Cg2409    | 1 | 1085.5142 | 0.3  | 328   | 337 | 0  | 40.6  | 26 | L | EHIGQAPYAT            | S | -0.6  | 5.12 |               |
| 10  | Cg2409    | 2 | 1086.5557 | 0.1  | 136   | 145 | 0  | 52.2  | 29 | V | TALDKNPEVT            | V | -0.8  | 4.08 |               |
| 10  | Cg2409    | 2 | 1095.5197 | 0.2  | 338   | 347 | 0  | 68.7  | 27 | T | STSPFVSDRT            | A | -0.6  | 6.78 |               |
| 10  | Cg2409    | 1 | 1101.4801 | -2.7 | 44    | 53  | 0  | 38.5  | 24 | R | MGWPDGITPE            | A | -0.6  | 3    |               |
| 10  | Cg2409    | 1 | 1108.4785 | -0.5 | 313   | 322 | 0  | 24.6  | 24 | I | SFRDSNPDAT            | N | -1.4  | 3.88 |               |
| 10  | Cg2409    | 2 | 1137.5675 | 1.1  | 295   | 303 | 0  | 42.1  | 28 | A | MMNFELRVV             | D | 0.8   | 6.98 |               |
| 10  | Cg2409    | 1 | 1140.5452 | 0.5  | 45    | 55  | 0  | 29.4  | 28 | M | GWPDGITPEAV           | A | -0.2  | 3    |               |
| 10  | Cg2409    | 1 | 1160.5655 | -2.0 | 244   | 252 | 0  | 30.5  | 29 | A | HSFWVPEFL             | F | 0.4   | 5.12 |               |
| 10  | Cg2409    | 1 | 1193.5452 | -0.6 | 270   | 279 | 0  | 56.6  | 28 | V | FQIEEITEEG            | A | -0.7  | 2.96 |               |
| 10  | Cg2409    | 1 | 1257.5812 | -0.6 | 43    | 53  | 0  | 41.4  | 25 | L | RMGWPDGITPE           | A | -1.0  | 4.08 |               |
| 10  | Cg2409    | 1 | 1271.5856 | -2.9 | 44    | 55  | 0  | 31.7  | 26 | R | MGWPDGITPEAV          | A | 0.0   | 3    |               |
| 10  | Cg2409    | 2 | 1296.6714 | 1.2  | 207   | 216 | 0  | 35.5  | 28 | S | YLEFNRIETL            | G | -0.2  | 4.26 |               |
| 10  | Cg2409    | 2 | 1383.7034 | 1.7  | 206   | 216 | 0  | 54.8  | 29 | V | SYLEFNRIETL           | G | -0.3  | 4.26 |               |
| 10  | Cg2409    | 1 | 1397.6939 | -1.9 | 325   | 337 | 0  | 52.1  | 28 | A | QALEHIGQAPYAT         | S | -0.3  | 5.12 |               |
| 10  | Cg2409    | 1 | 1427.6867 | -2.9 | 43    | 55  | 0  | 45.8  | 27 | L | RMGWPDGITPEAV         | A | -0.4  | 4.08 |               |
| 10  | Cg2409    | 2 | 1449.612  | -1.5 | 170   | 182 | 0  | 68.7  | 23 | G | GQDYQGSDPERQA         | A | -2.2  | 3.7  |               |
| 10  | Cg2409    | 1 | 1500.7672 | -3.6 | 136   | 149 | 0  | 43.6  | 30 | V | TALDKNPEVTVDVT        | A | -0.2  | 3.7  |               |
| 10  | Cg2409    | 1 | 1582.7739 | -3.2 | 323   | 337 | 0  | 64.6  | 28 | T | NAQALEHIGQAPYAT       | S | -0.4  | 5.12 |               |
| 10  | Cg2409    | 2 | 1597.7988 | 0.6  | 204   | 216 | 0  | 34.1  | 29 | S | DVSYLEFNRIETL         | G | -0.2  | 3.82 |               |
| 10  | Cg2409    | 1 | 1632.7606 | -0.1 | 40    | 53  | 0  | 42.2  | 28 | G | DFLRMGWPDGITPE        | A | -0.5  | 3.7  |               |
| 10  | Cg2409    | 2 | 1690.778  | 0.2  | 150   | 162 | 0  | 42.2  | 27 | T | AYQWNWKFYSEI          | D | -0.8  | 6.8  |               |
| 10  | Cg2409    | 2 | 1716.7703 | -0.5 | 166   | 181 | 0  | 45.6  | 25 | S | LAPGGQDYQGSDPERQ      | A | -1.7  | 3.7  |               |
| 10  | Cg2409    | 2 | 1787.8074 | -1.2 | 166   | 182 | 0  | 87.2  | 25 | S | LAPGGQDYQGSDPERQA     | A | -1.4  | 3.7  |               |
| 10  | Cg2409    | 2 | 1802.8662 | -2.1 | 40    | 55  | 0  | 45.2  | 29 | G | DFLRMGWPDGITPEAV      | A | -0.1  | 3.7  |               |
| 10  | Cg2409    | 1 | 1832.9156 | -3.4 | 209   | 224 | 0  | 36.1  | 30 | L | EFNRIETLGTDEIPV       | M | -0.4  | 3.68 |               |
| 10  | Cg2409    | 2 | 1874.8395 | -0.2 | 165   | 182 | 0  | 36.7  | 25 | G | SLAPGGQDYQGSDPERQA    | A | -1.4  | 3.7  |               |

| hit | accession | z | mass      | ppm  | start | end | mc | score | id | - | sequence                  | + | gravy | pl   | modification  |
|-----|-----------|---|-----------|------|-------|-----|----|-------|----|---|---------------------------|---|-------|------|---------------|
| 10  | Cg2409    | 2 | 1972.9717 | -0.4 | 38    | 55  | 0  | 43.4  | 29 | V | LGDFLRMGWPDGITPEAV        | A | 0.1   | 3.7  |               |
| 10  | Cg2409    | 2 | 2046.8879 | -1.1 | 163   | 182 | 0  | 83.3  | 22 | I | DGSLAPGGQDYQGSDPERQA      | A | -1.5  | 3.5  |               |
| 10  | Cg2409    | 2 | 2196.095  | 0.2  | 206   | 224 | 0  | 34.1  | 30 | V | SYLEFNRIETLGTDEIPV        | M | -0.2  | 3.68 |               |
| 10  | Cg2409    | 2 | 2539.1099 | -0.1 | 159   | 182 | 0  | 40.4  | 23 | G | YSEIDGSLAPGGQDYQGSDPERQA  | A | -1.3  | 3.42 |               |
| 10  | Cg2409    | 2 | 2673.2419 | -2.2 | 313   | 337 | 0  | 86.4  | 28 | I | SFRDSNPDATNAQALEHIGQAPYAT | S | -0.8  | 4.3  |               |
| 11  | Cg0447    | 1 | 599.3894  | 1.5  | 33    | 37  | 0  | 30.2  | 19 | S | ILELL                     | D | 2.5   | 3.3  |               |
| 11  | Cg0447    | 1 | 645.297   | 0.2  | 22    | 27  | 0  | 35.7  | 31 | T | VQVDDA                    | V | 0.0   | 2.92 |               |
| 11  | Cg0447    | 1 | 686.4214  | 0.7  | 32    | 37  | 0  | 33.7  | 26 | M | SILELL                    | D | 1.9   | 3.3  |               |
| 11  | Cg0447    | 1 | 701.3232  | 0.1  | 137   | 143 | 0  | 28.2  | 27 | T | APDADTL                   | H | -0.3  | 2.92 |               |
| 11  | Cg0447    | 1 | 715.3653  | 0.0  | 174   | 180 | 0  | 35.4  | 25 | A | AHLFTGA                   | K | 0.8   | 7.84 |               |
| 11  | Cg0447    | 1 | 767.3813  | -0.9 | 151   | 157 | 0  | 37.1  | 26 | A | ELALDHA                   | A | 0.1   | 4.06 |               |
| 11  | Cg0447    | 1 | 791.4905  | 0.4  | 184   | 190 | 0  | 31.2  | 18 | V | HLSLLPL                   | G | 1.4   | 7.84 |               |
| 11  | Cg0447    | 1 | 846.4884  | 0.5  | 1     | 7   | 0  | 52.9  | 27 | - | MKLTLEI                   | W | 0.8   | 6.94 |               |
| 11  | Cg0447    | 1 | 879.4338  | -0.6 | 15    | 22  | 0  | 39.1  | 29 | T | AEGKFETV                  | Q | -0.4  | 4.26 |               |
| 11  | Cg0447    | 1 | 890.5589  | -1.1 | 183   | 190 | 0  | 18.6  | 15 | L | VHLSLLPL                  | G | 1.7   | 7.84 |               |
| 11  | Cg0447    | 1 | 927.5277  | -1.4 | 95    | 102 | 0  | 35.9  | 27 | G | DTLKIEPL                  | R | -0.1  | 4.08 |               |
| 11  | Cg0447    | 1 | 975.4332  | -0.4 | 23    | 31  | 0  | 40.4  | 26 | V | QVDDAVAQM                 | S | 0.0   | 2.92 |               |
| 11  | Cg0447    | 1 | 991.4281  | -0.5 | 23    | 31  | 0  | 46.6  | 26 | V | QVDDAVAQM                 | S | 0.0   | 2.92 | Oxidation (M) |
| 11  | Cg0447    | 1 | 996.4586  | 0.4  | 124   | 132 | 0  | 28.6  | 27 | V | MEQGGYVTI                 | N | 0.1   | 3.3  |               |
| 11  | Cg0447    | 2 | 1010.492  | 0.1  | 89    | 97  | 0  | 30.0  | 26 | L | VSYKEGDTL                 | K | -0.7  | 4.08 |               |
| 11  | Cg0447    | 1 | 1037.5757 | -1.2 | 32    | 40  | 0  | 40.6  | 24 | M | SILELLDHV                 | N | 1.0   | 4.06 |               |
| 11  | Cg0447    | 1 | 1044.4724 | -0.6 | 133   | 143 | 0  | 25.4  | 25 | I | NAGTAPDADTL               | H | -0.4  | 2.92 |               |
| 11  | Cg0447    | 2 | 1061.5539 | -1.9 | 110   | 118 | 0  | 36.8  | 29 | V | IKDMVVDRS                 | A | -0.2  | 6.9  |               |
| 11  | Cg0447    | 2 | 1071.5097 | -1.4 | 8     | 17  | 0  | 48.9  | 27 | I | WRQAGPTAEG                | K | -1.2  | 6.98 |               |
| 11  | Cg0447    | 2 | 1077.5488 | -0.9 | 110   | 118 | 0  | 39.8  | 30 | V | IKDMVVDRS                 | A | -0.2  | 6.9  | Oxidation (M) |
| 11  | Cg0447    | 1 | 1270.667  | -2.5 | 4     | 14  | 0  | 41.4  | 28 | L | TLEIWRQAGPT               | A | -0.5  | 6.98 |               |
| 11  | Cg0447    | 1 | 1310.7558 | -2.7 | 186   | 197 | 0  | 28.1  | 25 | L | SLLPLGKEERGL              | R | -0.3  | 7.1  |               |
| 11  | Cg0447    | 1 | 1320.6562 | 0.0  | 18    | 29  | 0  | 32.9  | 29 | G | KFETVQVDDAVA              | Q | 0.0   | 3.7  |               |
| 11  | Cg0447    | 2 | 1491.7755 | 0.3  | 106   | 118 | 0  | 64.3  | 29 | A | AYPVIKDMVVDRS             | A | 0.1   | 6.82 |               |
| 11  | Cg0447    | 2 | 1491.782  | -2.9 | 90    | 102 | 0  | 57.1  | 29 | V | SYKEGDTLKIEPL             | R | -0.8  | 4.44 |               |
| 11  | Cg0447    | 2 | 1521.7463 | -0.3 | 41    | 53  | 0  | 55.4  | 29 | V | NNKFIEEGKEPFA             | F | -1.2  | 4.56 |               |
| 11  | Cg0447    | 1 | 1550.7763 | -3.2 | 119   | 132 | 0  | 57.5  | 29 | S | ALDRVMEQGGYVTI            | N | 0.2   | 4.08 |               |
| 11  | Cg0447    | 2 | 1562.8127 | -1.7 | 105   | 118 | 0  | 83.8  | 29 | S | AAYPVIKDMVVDRS            | A | 0.3   | 6.82 |               |
| 11  | Cg0447    | 1 | 1579.7552 | -2.0 | 18    | 31  | 0  | 65.2  | 28 | G | KFETVQVDDAVAQM            | S | -0.1  | 3.7  |               |
| 11  | Cg0447    | 2 | 1659.9672 | -1.4 | 183   | 197 | 0  | 30.7  | 24 | L | VHLSLLPLGKEERGL           | R | 0.1   | 7.82 |               |
| 11  | Cg0447    | 1 | 1739.8519 | -3.9 | 41    | 55  | 0  | 32.7  | 29 | V | NNKFIEEGKEPFAFA           | S | -0.7  | 4.56 |               |
| 11  | Cg0447    | 2 | 1836.8564 | -1.0 | 15    | 31  | 0  | 46.1  | 27 | T | AEGKFETVQVDDAVAQM         | S | -0.2  | 3.58 |               |
| 11  | Cg0447    | 2 | 1969.0156 | -2.2 | 32    | 48  | 0  | 52.8  | 30 | M | SILELLDHVNNKFIEEG         | K | -0.1  | 4.16 |               |
| 11  | Cg0447    | 2 | 2238.1137 | -2.5 | 113   | 132 | 0  | 41.7  | 30 | D | MVVDRSALDRVMEQGGYVTI      | N | 0.2   | 4.3  |               |
| 11  | Cg0447    | 3 | 2541.3115 | -1.1 | 32    | 53  | 0  | 65.5  | 31 | M | SILELLDHVNNKFIEEGKEPFA    | F | -0.3  | 4.36 |               |

| hit | accession | z | mass      | ppm  | start | end | mc | score | id | - | sequence                        | + | gravy | pl   | modification |
|-----|-----------|---|-----------|------|-------|-----|----|-------|----|---|---------------------------------|---|-------|------|--------------|
| 11  | Cg0447    | 2 | 2582.1997 | -2.6 | 133   | 157 | 0  | 79.4  | 27 | I | NAGTAPDADTLHVNHETAEALDHA        | A | -0.5  | 4.18 |              |
| 11  | Cg0447    | 2 | 2759.417  | -2.2 | 32    | 55  | 0  | 54.7  | 31 | M | SILELLDHVNNKFIEEGKEPFAFA        | S | -0.1  | 4.36 |              |
| 11  | Cg0447    | 2 | 3024.5413 | -2.6 | 106   | 132 | 0  | 58.0  | 31 | A | AYPVIKDMVVDRSALDRVMEQGGYVTI     | N | 0.2   | 4.46 |              |
| 11  | Cg0447    | 3 | 3095.5784 | -0.3 | 105   | 132 | 0  | 49.4  | 31 | S | AAYPVIKDMVVDRSALDRVMEQGGYVTI    | N | 0.2   | 4.46 |              |
| 11  | Cg0447    | 3 | 3489.7126 | -0.3 | 25    | 55  | 0  | 39.6  | 31 | V | DDAVAQMSILELLDHVNNKFIEEGKEPFAFA | S | -0.1  | 3.96 |              |
| 11  | Cg0447    | 3 | 3498.7341 | -1.1 | 23    | 53  | 0  | 40.7  | 31 | V | QVDDAVAQMSILELLDHVNNKFIEEGKEPFA | F | -0.2  | 3.96 |              |
| 12  | Cg2708    | 1 | 641.2809  | -0.2 | 83    | 87  | 0  | 20.9  | 19 | V | FQNYA                           | L | -0.7  | 5.92 |              |
| 12  | Cg2708    | 1 | 647.3279  | 0.6  | 234   | 240 | 0  | 38.5  | 31 | A | GFIGSPA                         | M | 0.8   | 6.02 |              |
| 12  | Cg2708    | 1 | 656.3745  | 1.2  | 297   | 302 | 0  | 33.6  | 26 | T | DLSIPI                          | K | 1.2   | 3.1  |              |
| 12  | Cg2708    | 1 | 750.3436  | 1.6  | 305   | 310 | 0  | 40.0  | 24 | L | DFVEEL                          | G | 0.1   | 2.94 |              |
| 12  | Cg2708    | 1 | 823.3534  | -0.1 | 94    | 101 | 0  | 32.5  | 25 | T | VGEMMGFA                        | L | 0.4   | 3.3  |              |
| 12  | Cg2708    | 1 | 827.4389  | 3.4  | 334   | 341 | 0  | 33.4  | 28 | V | PESGQIVV                        | R | 0.4   | 3.3  |              |
| 12  | Cg2708    | 1 | 837.3691  | 0.5  | 95    | 102 | 0  | 41.8  | 26 | V | GENMGFAL                        | K | 0.3   | 3.3  |              |
| 12  | Cg2708    | 1 | 945.4403  | -0.3 | 52    | 61  | 0  | 32.5  | 28 | L | AGLENVTDGA                      | I | 0.0   | 3    |              |
| 12  | Cg2708    | 1 | 991.5226  | -0.2 | 303   | 310 | 0  | 44.0  | 28 | I | KLDFVEEL                        | G | 0.0   | 3.82 |              |
| 12  | Cg2708    | 1 | 1039.4822 | -1.3 | 245   | 254 | 0  | 36.2  | 25 | G | TFSVKDGDAT                      | S | -0.5  | 3.88 |              |
| 12  | Cg2708    | 2 | 1086.5094 | -1.7 | 359   | 368 | 0  | 29.1  | 26 | R | IVEGGQHNFS                      | A | -0.4  | 5.12 |              |
| 12  | Cg2708    | 1 | 1175.5459 | -1.6 | 191   | 200 | 0  | 38.4  | 28 | V | YVTHDQTEAL                      | T | -0.7  | 4.06 |              |
| 12  | Cg2708    | 2 | 1232.6765 | 1.2  | 207   | 217 | 0  | 47.2  | 28 | I | AVLKDGYLQQV                     | G | 0.2   | 6.68 |              |
| 12  | Cg2708    | 2 | 1243.6309 | -0.2 | 218   | 228 | 0  | 36.4  | 29 | V | GAPRELYDRPA                     | N | -1.2  | 6.96 |              |
| 12  | Cg2708    | 2 | 1245.6023 | -0.1 | 270   | 280 | 0  | 59.9  | 28 | A | MTPEDNGRITI                     | G | -0.7  | 4.08 |              |
| 12  | Cg2708    | 1 | 1383.6281 | -2.2 | 83    | 93  | 0  | 37.3  | 26 | V | FQNYALYPHMT                     | V | -0.4  | 7.7  |              |
| 12  | Cg2708    | 2 | 1454.6712 | 0.5  | 241   | 254 | 0  | 70.7  | 27 | A | MNLGTFSVKDGDAT                  | S | -0.2  | 3.88 |              |
| 12  | Cg2708    | 2 | 1482.6966 | -1.6 | 83    | 94  | 0  | 54.6  | 28 | V | FQNYALYPHMTV                    | G | -0.1  | 7.7  |              |
| 12  | Cg2708    | 2 | 1604.812  | -0.7 | 157   | 170 | 0  | 39.4  | 29 | V | FLMDEPLSNLDAKL                  | R | 0.1   | 3.7  |              |
| 12  | Cg2708    | 1 | 1743.8679 | -3.0 | 281   | 296 | 0  | 75.5  | 30 | I | GFRPEALEIIEGEST                 | D | -0.4  | 3.8  |              |
| 12  | Cg2708    | 2 | 1806.8207 | -3.9 | 241   | 258 | 0  | 77.1  | 26 | A | MNLGTFSVKDGDATSGHA              | R | -0.3  | 5.1  |              |
| 12  | Cg2708    | 2 | 1848.8676 | -4.0 | 191   | 206 | 0  | 81.5  | 28 | V | YVTHDQTEALTMGDRI                | A | -0.6  | 4.3  |              |
| 12  | Cg2708    | 2 | 1905.9982 | -3.0 | 201   | 217 | 0  | 44.0  | 29 | L | TMGDRIAVLKDGYLQQV               | G | -0.1  | 6.82 |              |
| 12  | Cg2708    | 2 | 2019.0823 | -3.4 | 200   | 217 | 0  | 30.1  | 28 | A | LTMGDRIAVLKDGYLQQV              | G | 0.2   | 6.82 |              |
| 12  | Cg2708    | 2 | 2623.4108 | -2.4 | 281   | 304 | 0  | 35.7  | 29 | I | GFRPEALEIIEGESTDLSIPIKL         | D | 0.0   | 4    |              |
| 12  | Cg2708    | 2 | 3063.5335 | -0.9 | 191   | 217 | 0  | 61.1  | 31 | V | YVTHDQTEALTMGDRIAVLKDGYLQQV     | G | -0.3  | 4.44 |              |
| 13  | Cg3138    | 1 | 890.3869  | -0.1 | 217   | 224 | 0  | 29.9  | 24 | V | SEELADEV                        | A | -0.6  | 2.88 |              |
| 13  | Cg3138    | 1 | 898.5276  | -0.4 | 159   | 166 | 0  | 45.8  | 28 | A | AIIVWQVA                        | D | 2.1   | 6.02 |              |
| 13  | Cg3138    | 1 | 905.3879  | -0.4 | 148   | 155 | 0  | 25.3  | 24 | V | NDYNGNPI                        | N | -1.6  | 3.1  |              |
| 13  | Cg3138    | 1 | 970.5335  | 0.9  | 229   | 238 | 0  | 28.3  | 28 | A | AVAGLEIVEA                      | R | 1.5   | 3.12 |              |
| 13  | Cg3138    | 1 | 988.4978  | 1.4  | 27    | 34  | 0  | 28.6  | 28 | I | NEKNVWSL                        | G | -1.0  | 6.94 |              |
| 13  | Cg3138    | 1 | 1115.6227 | -2.3 | 120   | 130 | 0  | 39.4  | 28 | T | GLSFVPPLSVT                     | K | 1.2   | 6.02 |              |
| 13  | Cg3138    | 2 | 1158.5881 | -1.0 | 2     | 12  | 0  | 74.0  | 30 | M | STIEERTPGAV                     | A | -0.5  | 4.26 |              |
| 13  | Cg3138    | 1 | 1185.6394 | 3.0  | 159   | 169 | 0  | 68.7  | 28 | A | AIIVWQVADTA                     | Q | 1.3   | 3.1  |              |

| hit | accession | z | mass      | ppm  | start | end | mc | score | id | - | sequence                        | + | gravy | pl    | modification |
|-----|-----------|---|-----------|------|-------|-----|----|-------|----|---|---------------------------------|---|-------|-------|--------------|
| 13  | Cg3138    | 1 | 1188.6139 | -2.3 | 25    | 34  | 0  | 50.0  | 29 | V | SINEKNVWSL                      | G | -0.4  | 6.94  |              |
| 13  | Cg3138    | 2 | 1285.5575 | 0.1  | 194   | 205 | 0  | 43.6  | 23 | V | ATQHPYDSPVDG                    | R | -1.2  | 3.88  |              |
| 13  | Cg3138    | 1 | 1305.6928 | -1.7 | 239   | 250 | 0  | 42.5  | 28 | A | RISLSYAPEIA                     | Q | 0.3   | 6.88  |              |
| 13  | Cg3138    | 1 | 1312.6987 | -2.4 | 280   | 290 | 0  | 39.6  | 27 | T | ALDQLEQREIV                     | D | -0.4  | 3.82  |              |
| 13  | Cg3138    | 1 | 1391.5994 | -1.0 | 176   | 186 | 0  | 48.4  | 23 | V | EDFEEFLHQQA                     | E | -1.2  | 3.68  |              |
| 13  | Cg3138    | 1 | 1541.7838 | -3.8 | 25    | 39  | 0  | 71.2  | 29 | V | SINEKNVWSLGGAP                  | A | -0.2  | 6.94  |              |
| 13  | Cg3138    | 2 | 1612.7046 | 2.2  | 172   | 184 | 0  | 56.6  | 25 | A | SFSVEDFEEFLHQ                   | Q | -0.5  | 3.68  |              |
| 13  | Cg3138    | 2 | 1653.7311 | -0.8 | 173   | 185 | 0  | 63.1  | 25 | S | FSVEDFEEFLHQQ                   | A | -0.7  | 3.68  |              |
| 13  | Cg3138    | 1 | 1676.8006 | -2.7 | 310   | 325 | 0  | 58.4  | 28 | C | SDTNAQPIVNAGSLYQ                | - | -0.4  | 3.1   |              |
| 13  | Cg3138    | 2 | 1740.7631 | -0.7 | 172   | 185 | 0  | 69.8  | 24 | A | SFSVEDFEEFLHQQ                  | A | -0.7  | 3.68  |              |
| 13  | Cg3138    | 2 | 1811.8002 | -2.0 | 172   | 186 | 0  | 77.5  | 25 | A | SFSVEDFEEFLHQQA                 | E | -0.5  | 3.68  |              |
| 13  | Cg3138    | 2 | 1818.8483 | -2.0 | 208   | 224 | 0  | 102.9 | 28 | V | SLRGATDEVSEELADEV               | A | -0.5  | 3.44  |              |
| 13  | Cg3138    | 2 | 2027.8749 | 1.1  | 172   | 188 | 0  | 39.9  | 23 | A | SFSVEDFEEFLHQQAES               | A | -0.7  | 3.58  |              |
| 13  | Cg3138    | 2 | 2098.912  | -0.5 | 172   | 189 | 0  | 29.5  | 23 | A | SFSVEDFEEFLHQQAESA              | L | -0.6  | 3.58  |              |
| 13  | Cg3138    | 2 | 2245.0822 | -2.6 | 208   | 228 | 0  | 108.8 | 29 | V | SLRGATDEVSEELADEVAQRA           | A | -0.6  | 3.82  |              |
| 13  | Cg3138    | 3 | 2265.1713 | -1.1 | 280   | 298 | 0  | 43.0  | 30 | T | ALDQLEQREIVDLPERRA              | A | -1.0  | 4.06  |              |
| 13  | Cg3138    | 2 | 2486.2248 | -3.0 | 208   | 231 | 0  | 85.5  | 30 | V | SLRGATDEVSEELADEVAQRAAVA        | G | -0.2  | 3.82  |              |
| 13  | Cg3138    | 3 | 3041.5703 | -0.1 | 264   | 290 | 0  | 32.0  | 31 | V | DAREKIVEGAVTMVETALDQLEQREIV     | D | -0.2  | 4.02  |              |
| 13  | Cg3138    | 3 | 3324.7599 | -1.8 | 261   | 290 | 0  | 39.7  | 31 | S | AIVDAREKIVEGAVTMVETALDQLEQREIV  | D | 0.2   | 4.02  |              |
| 13  | Cg3138    | 3 | 3411.7919 | -1.0 | 260   | 290 | 0  | 37.6  | 31 | A | SAIVDAREKIVEGAVTMVETALDQLEQREIV | D | 0.1   | 4.02  |              |
| 14  | Cg1366    | 1 | 597.3486  | 1.3  | 59    | 65  | 0  | 41.0  | 27 | F | PGGVIGV                         | A | 1.4   | 6.02  |              |
| 14  | Cg1366    | 1 | 655.3217  | 2.0  | 300   | 304 | 0  | 22.8  | 22 | G | DVFYL                           | H | 1.2   | 3.1   |              |
| 14  | Cg1366    | 1 | 755.4429  | 0.9  | 326   | 332 | 0  | 37.4  | 25 | T | ALPIET                          | K | 1.3   | 3.3   |              |
| 14  | Cg1366    | 1 | 808.3603  | -0.4 | 409   | 416 | 0  | 30.5  | 30 | T | FASDLDA                         | S | 0.5   | 2.92  |              |
| 14  | Cg1366    | 1 | 820.4079  | -0.6 | 399   | 405 | 0  | 30.3  | 29 | A | AFRDLEA                         | F | -0.2  | 4.08  |              |
| 14  | Cg1366    | 1 | 914.5185  | -1.4 | 390   | 398 | 0  | 30.3  | 29 | V | AGSLRLDLA                       | A | 0.6   | 6.78  |              |
| 14  | Cg1366    | 2 | 952.4502  | -0.5 | 271   | 278 | 0  | 34.2  | 27 | I | YDDLTKQA                        | E | -1.4  | 3.88  |              |
| 14  | Cg1366    | 2 | 1014.5094 | 0.1  | 66    | 74  | 0  | 53.3  | 28 | V | AQNLEADRV                       | G | -0.8  | 4.08  |              |
| 14  | Cg1366    | 1 | 1038.5134 | 0.4  | 399   | 407 | 0  | 31.8  | 27 | A | AFRDLEAFA                       | T | 0.4   | 4.08  |              |
| 14  | Cg1366    | 1 | 1055.5499 | -0.5 | 95    | 105 | 0  | 39.6  | 27 | T | GDVLSIPVGEA                     | F | 0.8   | 3     |              |
| 14  | Cg1366    | 1 | 1065.5342 | -0.8 | 270   | 278 | 0  | 32.2  | 28 | V | IYDDLTKQA                       | E | -0.7  | 3.88  |              |
| 14  | Cg1366    | 1 | 1139.5611 | -2.9 | 399   | 408 | 0  | 37.6  | 27 | A | AFRDLEAFAT                      | F | 0.3   | 4.08  |              |
| 14  | Cg1366    | 1 | 1151.5346 | -0.9 | 223   | 232 | 0  | 31.9  | 28 | T | LEEQGALEYT                      | T | -0.7  | 3.02  |              |
| 14  | Cg1366    | 1 | 1159.6084 | -2.5 | 313   | 324 | 0  | 34.5  | 29 | A | AKLSDELGAGSI                    | T | 0.2   | 4.08  |              |
| 14  | Cg1366    | 2 | 1163.6128 | 0.9  | 244   | 254 | 0  | 39.9  | 28 | A | GFKWLAPFAGA                     | A | 0.7   | 10.1  |              |
| 14  | Cg1366    | 2 | 1307.7085 | 0.0  | 139   | 149 | 0  | 41.4  | 27 | T | VLERQPVEEPL                     | A | -0.5  | 3.96  |              |
| 14  | Cg1366    | 2 | 1387.7307 | -0.7 | 529   | 541 | 0  | 38.2  | 30 | L | DAGQVKKDQLTVS                   | R | -0.7  | 6.88  |              |
| 14  | Cg1366    | 2 | 1388.6419 | 0.3  | 119   | 131 | 0  | 45.6  | 27 | I | DGLGEIASEEDRV                   | L | -0.7  | 3.5   |              |
| 14  | Cg1366    | 1 | 1413.7504 | -1.6 | 52    | 65  | 0  | 36.9  | 29 | M | ANELLEFPGGVIGV                  | A | 0.8   | 3.12  |              |
| 14  | Cg1366    | 2 | 1422.8347 | 2.0  | 106   | 118 | 0  | 50.9  | 24 | A | FLGRVINPLGQPI                   | D | 0.6   | 11.04 |              |

| hit | accession | z | mass      | ppm  | start | end | mc | score | id | - | sequence                           | + | gravy | pl   | modification |
|-----|-----------|---|-----------|------|-------|-----|----|-------|----|---|------------------------------------|---|-------|------|--------------|
| 14  | Cg1366    | 2 | 1476.746  | 0.1  | 79    | 91  | 0  | 55.2  | 30 | V | LGNYELLKEGDQV                      | R | -0.6  | 3.82 |              |
| 14  | Cg1366    | 2 | 1479.7933 | -1.6 | 139   | 151 | 0  | 45.3  | 27 | T | VLERQPVEEPLAT                      | G | -0.4  | 3.96 |              |
| 14  | Cg1366    | 1 | 1484.7875 | -1.3 | 52    | 66  | 0  | 43.4  | 29 | M | ANELLEFPGGVIGVA                    | Q | 0.9   | 3.12 |              |
| 14  | Cg1366    | 1 | 1507.746  | -4.1 | 240   | 254 | 0  | 33.9  | 29 | A | SDAAGFKWLAPFAGA                    | A | 0.5   | 6.76 |              |
| 14  | Cg1366    | 1 | 1743.8526 | -2.6 | 119   | 134 | 0  | 69.2  | 29 | I | DGLGEIASEEDRVLEL                   | Q | -0.3  | 3.44 |              |
| 14  | Cg1366    | 2 | 3081.5805 | -2.1 | 45    | 74  | 0  | 55.8  | 31 | V | SGLPSVMANELLEFPGGVIGVAQNLEADRV     | G | 0.4   | 3.68 |              |
| 14  | Cg1366    | 2 | 3430.7467 | -2.9 | 119   | 149 | 0  | 53.3  | 31 | I | DGLGEIASEEDRVLELQAPTTLERQPVVEEPL   | A | -0.5  | 3.62 |              |
| 14  | Cg1366    | 3 | 3581.8801 | -3.3 | 409   | 441 | 0  | 37.1  | 31 | T | FASDLDAASKSQLERQRLVQLLIQSENAPQAV   | E | -0.3  | 4.56 |              |
| 14  | Cg1366    | 2 | 3602.8315 | -1.3 | 119   | 151 | 0  | 32.7  | 32 | I | DGLGEIASEEDRVLELQAPTTLERQPVVEEPLAT | G | -0.4  | 3.62 |              |
| 15  | Cg2780    | 1 | 717.4061  | 1.8  | 105   | 110 | 0  | 42.6  | 29 | A | NYVLPL                             | Q | 0.9   | 5.92 |              |
| 15  | Cg2780    | 1 | 753.4061  | 0.7  | 370   | 376 | 0  | 25.5  | 25 | T | FLFGGLT                            | G | 1.7   | 6.02 |              |
| 15  | Cg2780    | 1 | 808.3028  | -1.1 | 509   | 515 | 0  | 18.9  | 16 | V | DDPWGYG                            | N | -1.7  | 2.92 |              |
| 15  | Cg2780    | 1 | 898.5892  | -0.6 | 223   | 230 | 0  | 26.7  | 20 | L | LIFPLLLA                           | A | 2.8   | 6.02 |              |
| 15  | Cg2780    | 1 | 921.4708  | -2.2 | 500   | 506 | 0  | 29.4  | 26 | S | WRYGELV                            | T | -0.4  | 6.88 |              |
| 15  | Cg2780    | 1 | 923.5117  | -1.7 | 370   | 378 | 0  | 31.9  | 26 | T | FLFGGLTGI                          | M | 1.8   | 6.02 |              |
| 15  | Cg2780    | 1 | 949.5273  | -0.8 | 272   | 280 | 0  | 29.0  | 28 | L | ALPFFGIVS                          | E | 1.9   | 6.02 |              |
| 15  | Cg2780    | 1 | 958.5488  | -2.4 | 105   | 112 | 0  | 57.1  | 28 | A | NYVLPLQI                           | G | 0.8   | 5.92 |              |
| 15  | Cg2780    | 1 | 995.5076  | -2.0 | 382   | 390 | 0  | 32.3  | 26 | A | SPPLDFHLA                          | D | 0.2   | 4.94 |              |
| 15  | Cg2780    | 1 | 1020.5348 | -1.6 | 189   | 197 | 0  | 31.6  | 28 | I | NMLTTILCL                          | R | 1.7   | 5.32 |              |
| 15  | Cg2780    | 1 | 1082.7103 | -1.8 | 222   | 231 | 0  | 23.1  | 18 | A | LLIFPLLLAA                         | A | 2.8   | 6.02 |              |
| 15  | Cg2780    | 1 | 1122.4618 | -2.9 | 509   | 518 | 0  | 35.1  | 20 | V | DDPWGYGNSL                         | E | -1.2  | 2.92 |              |
| 15  | Cg2780    | 1 | 1144.4924 | -0.7 | 464   | 473 | 0  | 38.3  | 24 | A | DYLDSDGFTI                         | Y | -0.3  | 2.82 |              |
| 15  | Cg2780    | 2 | 1185.5641 | -0.4 | 544   | 552 | 0  | 29.0  | 26 | A | FELHYPHMI                          | E | 0.0   | 6.02 |              |
| 15  | Cg2780    | 2 | 1225.5662 | -1.6 | 522   | 532 | 0  | 34.2  | 26 | A | TSCPPPRHNFA                        | S | -0.9  | 9.02 |              |
| 15  | Cg2780    | 1 | 1322.5779 | -1.4 | 507   | 518 | 0  | 36.0  | 25 | V | TVDDPWGYGNSL                       | E | -0.7  | 2.92 |              |
| 15  | Cg2780    | 1 | 1395.646  | -1.9 | 140   | 153 | 0  | 35.3  | 27 | T | GFLTPGGAADFGWT                     | M | 0.3   | 3.1  |              |
| 15  | Cg2780    | 2 | 1401.7001 | -2.0 | 8     | 20  | 0  | 41.6  | 30 | R | VDGHVAPQRPEPT                      | G | -1.1  | 5.22 |              |
| 15  | Cg2780    | 1 | 1429.8221 | -1.6 | 273   | 285 | 0  | 31.8  | 26 | A | LPFFGIVSEIIPV                      | F | 1.8   | 3.3  |              |
| 15  | Cg2780    | 1 | 1437.5837 | -2.2 | 509   | 520 | 0  | 33.9  | 19 | V | DDPWGYGNSLEW                       | A | -1.4  | 2.88 |              |
| 15  | Cg2780    | 1 | 1508.6208 | -2.6 | 509   | 521 | 0  | 42.8  | 20 | V | DDPWGYGNSLEWA                      | T | -1.1  | 2.88 |              |
| 15  | Cg2780    | 1 | 1601.7072 | -3.1 | 149   | 162 | 0  | 42.2  | 24 | A | DFGWTMYSPLSDAI                     | H | 0.1   | 2.92 |              |
| 15  | Cg2780    | 1 | 1601.7483 | -1.5 | 544   | 555 | 0  | 41.0  | 27 | A | FELHYPHMIERM                       | R | -0.5  | 6.02 |              |
| 15  | Cg2780    | 2 | 1607.6892 | 0.1  | 508   | 521 | 0  | 50.8  | 23 | T | VDDPWGYGNSLEWA                     | T | -0.8  | 2.88 |              |
| 15  | Cg2780    | 1 | 1708.7369 | -1.2 | 507   | 521 | 0  | 32.1  | 23 | V | TVDDPWGYGNSLEWA                    | T | -0.7  | 2.88 |              |
| 15  | Cg2780    | 1 | 1809.7846 | -1.9 | 507   | 522 | 0  | 41.4  | 23 | V | TVDDPWGYGNSLEWAT                   | S | -0.7  | 2.88 |              |
| 15  | Cg2780    | 1 | 1986.9186 | -3.7 | 140   | 158 | 0  | 46.8  | 27 | T | GFLTPGGAADFGWTMYSPL                | S | 0.3   | 3.1  |              |
| 16  | Cg2404    | 1 | 543.3057  | -0.9 | 265   | 269 | 0  | 38.4  | 17 | V | FPLPA                              | E | 1.0   | 6.02 |              |
| 16  | Cg2404    | 1 | 642.3741  | -0.9 | 264   | 269 | 0  | 21.1  | 17 | T | VFPLPA                             | E | 1.6   | 6.02 |              |
| 16  | Cg2404    | 1 | 676.3948  | 0.0  | 58    | 62  | 0  | 25.6  | 19 | T | FWLVL                              | G | 2.7   | 6.02 |              |
| 16  | Cg2404    | 1 | 679.4268  | -1.2 | 376   | 381 | 0  | 22.6  | 21 | A | LPQLPI                             | T | 0.9   | 6.02 |              |

| hit | accession | z | mass      | ppm  | start | end | mc | score | id | - | sequence                          | + | gravy | pl    | modification  |
|-----|-----------|---|-----------|------|-------|-----|----|-------|----|---|-----------------------------------|---|-------|-------|---------------|
| 16  | Cg2404    | 1 | 879.543   | -1.1 | 376   | 383 | 0  | 46.5  | 18 | A | LPQLPITV                          | D | 1.1   | 6.02  |               |
| 16  | Cg2404    | 1 | 906.5651  | -1.1 | 374   | 381 | 0  | 26.8  | 18 | A | RALPQLPI                          | T | 0.3   | 11.04 |               |
| 16  | Cg2404    | 2 | 915.4848  | -2.5 | 164   | 174 | 0  | 30.1  | 27 | I | MGLAGGGAVLA                       | G | 1.6   | 6.02  |               |
| 16  | Cg2404    | 1 | 956.4967  | -2.2 | 394   | 402 | 0  | 52.2  | 28 | G | NFIEPLGPA                         | F | 0.3   | 3.3   |               |
| 16  | Cg2404    | 1 | 975.4662  | -1.6 | 147   | 154 | 0  | 29.1  | 27 | A | LLNDSWQT                          | S | -0.7  | 3.1   |               |
| 16  | Cg2404    | 1 | 977.6022  | -1.8 | 373   | 381 | 0  | 24.8  | 17 | A | ARALPQLPI                         | T | 0.5   | 11.04 |               |
| 16  | Cg2404    | 1 | 1084.5553 | -2.0 | 392   | 402 | 0  | 37.3  | 27 | A | AGNFIEPLGPA                       | F | 0.3   | 3.3   |               |
| 16  | Cg2404    | 1 | 1090.5369 | -3.0 | 260   | 269 | 0  | 33.0  | 29 | A | SMETVFPLPA                        | E | 0.6   | 3.3   |               |
| 16  | Cg2404    | 1 | 1106.5318 | -2.6 | 260   | 269 | 0  | 31.0  | 29 | A | SMETVFPLPA                        | E | 0.6   | 3.3   | Oxidation (M) |
| 16  | Cg2404    | 1 | 1230.6456 | -2.6 | 24    | 34  | 0  | 55.3  | 29 | A | RLGTELEDDVTI                      | A | 0.0   | 3.7   |               |
| 16  | Cg2404    | 1 | 1284.5087 | -1.1 | 321   | 330 | 0  | 50.5  | 17 | S | FHYGDYYAYS                        | K | -0.9  | 4.94  |               |
| 16  | Cg2404    | 1 | 1301.6827 | -2.1 | 24    | 35  | 0  | 57.1  | 29 | A | RLGTELEDDVTIA                     | Y | 0.1   | 3.7   |               |
| 16  | Cg2404    | 1 | 1303.5914 | -2.0 | 73    | 81  | 0  | 27.0  | 26 | A | TYIFWPWEY                         | K | -0.3  | 3.3   |               |
| 16  | Cg2404    | 1 | 1309.5132 | -2.6 | 270   | 281 | 0  | 29.1  | 18 | A | EMVNDGAEYDPA                      | K | -0.9  | 2.84  |               |
| 16  | Cg2404    | 1 | 1349.7819 | -4.1 | 369   | 381 | 0  | 34.3  | 23 | V | FGPAARALPQLPI                     | T | 0.5   | 11.04 |               |
| 16  | Cg2404    | 2 | 1502.7234 | 0.1  | 73    | 83  | 0  | 29.4  | 29 | A | TYIFWPWEYKA                       | H | -0.5  | 6.8   |               |
| 16  | Cg2404    | 2 | 1510.7238 | -0.9 | 187   | 199 | 0  | 39.8  | 28 | I | KNPWNPKKEGPM DV                   | Q | -1.7  | 6.98  |               |
| 16  | Cg2404    | 2 | 1553.6958 | -0.8 | 2     | 14  | 0  | 50.1  | 26 | M | SNNNDKQYTTQEL                     | N | -2.2  | 4.08  |               |
| 16  | Cg2404    | 1 | 1698.908  | -4.7 | 376   | 390 | 0  | 32.0  | 28 | A | LPQLPITVDEEGYLI                   | A | 0.3   | 2.94  |               |
| 16  | Cg2404    | 1 | 1769.9451 | -2.2 | 376   | 391 | 0  | 39.7  | 29 | A | LPQLPITVDEEGYLI                   | A | 0.4   | 2.94  |               |
| 16  | Cg2404    | 2 | 1789.9151 | -0.8 | 394   | 408 | 0  | 63.4  | 30 | G | NFIEPLGPAFWERKS                   | - | -0.6  | 7.1   |               |
| 16  | Cg2404    | 2 | 1868.8913 | -1.2 | 183   | 199 | 0  | 55.0  | 28 | M | GGMIKNPWNPKKEGPM DV               | Q | -1.0  | 6.98  |               |
| 16  | Cg2404    | 2 | 1917.9737 | -2.4 | 392   | 408 | 0  | 43.2  | 30 | A | AGNFIEPLGPAFWERKS                 | - | -0.4  | 7.1   |               |
| 16  | Cg2404    | 2 | 2440.3002 | -0.4 | 369   | 391 | 0  | 51.3  | 30 | V | FGPAARALPQLPITVDEEGYLI            | A | 0.4   | 3.82  |               |
| 16  | Cg2404    | 2 | 2665.343  | -0.2 | 175   | 199 | 0  | 58.4  | 31 | A | GLTIIAPMGMIKNPWNPKKEGPM DV        | Q | -0.1  | 6.98  |               |
| 16  | Cg2404    | 3 | 3751.7181 | -2.5 | 270   | 302 | 0  | 45.6  | 26 | A | EMVNDGAEYDPAKDVYEHQMHSVHGPRNAVMLI | R | -0.6  | 4.72  |               |
| 17  | Cg2875    | 1 | 648.3231  | 0.0  | 23    | 29  | 0  | 34.6  | 25 | I | FAGAQGV                           | F | 0.9   | 6.02  |               |
| 17  | Cg2875    | 1 | 680.3381  | 0.7  | 30    | 35  | 0  | 30.9  | 28 | V | FDSIVT                            | A | 1.1   | 3.1   |               |
| 17  | Cg2875    | 1 | 751.3752  | -2.0 | 30    | 36  | 0  | 32.5  | 29 | V | FDSIVTA                           | S | 1.2   | 3.1   |               |
| 17  | Cg2875    | 1 | 820.4331  | 0.2  | 4     | 10  | 0  | 35.2  | 30 | S | VFDIIQS                           | I | 1.2   | 3.1   |               |
| 17  | Cg2875    | 1 | 850.4436  | -0.4 | 29    | 36  | 0  | 32.8  | 28 | G | VFDSIVTA                          | S | 1.6   | 3.1   |               |
| 17  | Cg2875    | 1 | 907.4651  | 0.0  | 28    | 36  | 0  | 32.2  | 29 | Q | GVFDSIVTA                         | S | 1.3   | 3.1   |               |
| 17  | Cg2875    | 1 | 907.4651  | 1.4  | 3     | 10  | 0  | 38.6  | 29 | T | SVFDIIQS                          | I | 0.9   | 3.1   |               |
| 17  | Cg2875    | 2 | 986.4822  | 1.5  | 12    | 21  | 0  | 34.5  | 26 | I | FDGVHGLVGS                        | I | 0.6   | 4.94  |               |
| 17  | Cg2875    | 1 | 1012.5342 | 0.6  | 11    | 20  | 0  | 31.6  | 27 | S | IFDGVHGLVG                        | S | 1.2   | 4.94  |               |
| 17  | Cg2875    | 1 | 1071.5349 | 0.6  | 9     | 18  | 0  | 32.8  | 27 | I | QSIFDGVHGL                        | V | 0.4   | 4.94  |               |
| 17  | Cg2875    | 1 | 1092.5452 | 0.0  | 25    | 35  | 0  | 31.5  | 29 | A | GAQGVFDSIVT                       | A | 0.7   | 3.1   |               |
| 17  | Cg2875    | 2 | 1099.5662 | -1.2 | 11    | 21  | 0  | 61.2  | 28 | S | IFDGVHGLVGS                       | I | 1.0   | 4.94  |               |
| 17  | Cg2875    | 1 | 1163.5823 | -0.5 | 25    | 36  | 0  | 41.6  | 29 | A | GAQGVFDSIVTA                      | S | 0.8   | 3.1   |               |
| 17  | Cg2875    | 2 | 1212.6503 | 0.2  | 11    | 22  | 0  | 81.4  | 28 | S | IFDGVHGLVGS                       | F | 1.3   | 4.94  |               |

| hit | accession | z | mass      | ppm  | start | end | mc | score | id | - | sequence                    | + | gravy | pl    | modification |
|-----|-----------|---|-----------|------|-------|-----|----|-------|----|---|-----------------------------|---|-------|-------|--------------|
| 17  | Cg2875    | 2 | 1314.6568 | 1.3  | 9     | 21  | 0  | 61.1  | 29 | I | QSIFDGVHGLVGS               | I | 0.5   | 4.94  |              |
| 17  | Cg2875    | 2 | 1381.6878 | 2.6  | 23    | 36  | 0  | 66.1  | 28 | I | FAGAQQVFDSIVTA              | S | 1.0   | 3.1   |              |
| 17  | Cg2875    | 2 | 1427.7409 | 0.9  | 9     | 22  | 0  | 70.4  | 29 | I | QSIFDGVHGLVGS               | F | 0.8   | 4.94  |              |
| 17  | Cg2875    | 1 | 1494.7719 | -2.5 | 22    | 36  | 0  | 33.6  | 28 | S | IFAGAQQVFDSIVTA             | S | 1.3   | 3.1   |              |
| 17  | Cg2875    | 2 | 1581.8039 | 0.5  | 21    | 36  | 0  | 46.5  | 29 | G | SIFAGAQQVFDSIVTA            | S | 1.1   | 3.1   |              |
| 17  | Cg2875    | 2 | 1658.8668 | -0.1 | 4     | 18  | 0  | 33.4  | 30 | S | VFDIIQSIFDGVHGL             | V | 1.1   | 3.88  |              |
| 17  | Cg2875    | 1 | 1745.8989 | -2.4 | 3     | 18  | 0  | 40.1  | 29 | T | SVFDIIQSIFDGVHGL            | V | 1.0   | 3.88  |              |
| 17  | Cg2875    | 2 | 2015.0728 | -1.0 | 4     | 22  | 0  | 33.7  | 30 | S | VFDIIQSIFDGVHGLVGS          | F | 1.2   | 3.88  |              |
| 17  | Cg2875    | 2 | 2102.1048 | -0.7 | 3     | 22  | 0  | 38.2  | 30 | T | SVFDIIQSIFDGVHGLVGS         | F | 1.1   | 3.88  |              |
| 17  | Cg2875    | 2 | 2645.3854 | 0.8  | 4     | 29  | 0  | 43.7  | 30 | S | VFDIIQSIFDGVHGLVGSIFAGAQQV  | F | 1.1   | 3.88  |              |
| 17  | Cg2875    | 2 | 2732.4174 | 0.6  | 3     | 29  | 0  | 35.0  | 31 | T | SVFDIIQSIFDGVHGLVGSIFAGAQQV | F | 1.1   | 3.88  |              |
| 18  | Cg3182    | 1 | 539.3683  | -0.2 | 172   | 176 | 0  | 26.5  | 23 | A | IVVLP                       | V | 3.0   | 6.02  |              |
| 18  | Cg3182    | 1 | 709.4738  | 1.4  | 171   | 177 | 0  | 42.6  | 21 | N | AIVVLPV                     | G | 3.0   | 6.02  |              |
| 18  | Cg3182    | 2 | 748.3868  | 0.9  | 359   | 365 | 0  | 41.3  | 29 | A | SFRPSGV                     | H | -0.2  | 11.04 |              |
| 18  | Cg3182    | 1 | 752.3493  | 0.5  | 591   | 596 | 0  | 36.4  | 26 | G | NIYWSA                      | S | 0.0   | 5.92  |              |
| 18  | Cg3182    | 1 | 789.3657  | -0.9 | 483   | 489 | 0  | 34.5  | 28 | V | TFEHGSI                     | Y | -0.2  | 5.12  |              |
| 18  | Cg3182    | 1 | 896.4127  | 0.0  | 62    | 69  | 0  | 28.8  | 26 | V | TDGLTDYL                    | K | -0.3  | 2.92  |              |
| 18  | Cg3182    | 1 | 1039.5914 | -2.0 | 171   | 181 | 0  | 45.0  | 25 | N | AIVVLPVGGES                 | S | 1.5   | 3.3   |              |
| 18  | Cg3182    | 1 | 1087.4723 | -0.6 | 605   | 614 | 0  | 25.8  | 23 | L | HGDIFDAWGA                  | K | -0.1  | 3.88  |              |
| 18  | Cg3182    | 2 | 1133.5465 | 1.1  | 451   | 461 | 0  | 44.2  | 28 | I | NARYSELGGPA                 | S | -0.8  | 6.88  |              |
| 18  | Cg3182    | 1 | 1153.504  | -0.8 | 507   | 516 | 0  | 39.9  | 25 | A | AWGTQDYEK                   | S | -1.6  | 4.08  |              |
| 18  | Cg3182    | 2 | 1176.5887 | 0.2  | 640   | 649 | 0  | 42.0  | 28 | I | DFQNGTIRQV                  | N | -0.8  | 6.78  |              |
| 18  | Cg3182    | 1 | 1182.5305 | -0.3 | 580   | 590 | 0  | 25.5  | 25 | I | NGGAFQEFK                   | N | -1.1  | 4.26  |              |
| 18  | Cg3182    | 1 | 1184.5536 | -2.6 | 496   | 506 | 0  | 27.0  | 26 | T | GPWEIPGDMLA                 | A | 0.0   | 3     |              |
| 18  | Cg3182    | 1 | 1200.5564 | 0.7  | 604   | 614 | 0  | 48.8  | 27 | I | LHGDIFDAWGA                 | K | 0.3   | 3.88  |              |
| 18  | Cg3182    | 2 | 1239.5004 | -1.5 | 308   | 320 | 0  | 28.3  | 19 | V | SSNGADDFGKEG                | S | -1.3  | 3.7   |              |
| 18  | Cg3182    | 2 | 1256.5673 | -0.2 | 161   | 170 | 0  | 63.5  | 26 | T | NIEQYYADKN                  | A | -1.8  | 4.08  |              |
| 18  | Cg3182    | 1 | 1386.649  | 0.5  | 494   | 506 | 0  | 34.2  | 27 | A | TTGPWEIPGDMLA               | A | -0.1  | 3     |              |
| 18  | Cg3182    | 2 | 1486.6576 | -0.8 | 159   | 170 | 0  | 34.2  | 25 | I | ETNIEQYYADKN                | A | -1.8  | 3.82  |              |
| 18  | Cg3182    | 2 | 1496.6379 | -0.3 | 308   | 323 | 0  | 23.2  | 23 | V | SSNGADDFGKEGSVA             | I | -0.7  | 3.7   |              |
| 18  | Cg3182    | 2 | 1828.7904 | 0.3  | 615   | 630 | 0  | 43.2  | 23 | A | KGWEQGEYGFPTSDQT            | A | -1.6  | 3.82  |              |
| 18  | Cg3182    | 2 | 2233.9341 | -1.1 | 183   | 200 | 0  | 35.1  | 20 | S | FYSDWEGPNNGKNYQWET          | F | -1.9  | 3.82  |              |
| 18  | Cg3182    | 2 | 2320.9661 | -0.1 | 182   | 200 | 0  | 20.7  | 18 | S | SFYSWEGPNNGKNYQWET          | F | -1.8  | 3.82  |              |
| 19  | Cg2403    | 1 | 640.4523  | -0.9 | 211   | 216 | 0  | 28.6  | 25 | A | ILLGLI                      | A | 3.3   | 6.02  |              |
| 19  | Cg2403    | 1 | 667.3945  | -0.7 | 376   | 380 | 0  | 23.2  | 15 | V | FYILL                       | T | 2.7   | 5.92  |              |
| 19  | Cg2403    | 1 | 704.3857  | -0.3 | 25    | 30  | 0  | 41.2  | 27 | I | NKVFPT                      | H | -0.5  | 10.1  |              |
| 19  | Cg2403    | 1 | 751.5207  | 0.9  | 207   | 213 | 0  | 20.0  | 17 | L | IIPAILL                     | G | 3.0   | 6.02  |              |
| 19  | Cg2403    | 1 | 779.3854  | 0.1  | 311   | 316 | 0  | 34.5  | 26 | A | WELYLG                      | N | 0.3   | 3.3   |              |
| 19  | Cg2403    | 1 | 845.3953  | -1.3 | 73    | 80  | 0  | 37.2  | 27 | L | PLNGVEMS                    | R | 0.0   | 3.3   |              |
| 19  | Cg2403    | 1 | 938.4749  | -2.0 | 56    | 63  | 0  | 29.5  | 26 | T | LFFDPSIT                    | K | 0.9   | 3.1   |              |



| hit | accession | z | mass      | ppm  | start | end | mc | score | id | - | sequence                          | + | gravy | pl   | modification |
|-----|-----------|---|-----------|------|-------|-----|----|-------|----|---|-----------------------------------|---|-------|------|--------------|
| 19  | Cg2403    | 1 | 1027.5484 | -1.3 | 441   | 450 | 0  | 44.9  | 26 | T | GIKQMPNGA                         | F | -0.1  | 10.1 |              |
| 19  | Cg2403    | 1 | 1078.5157 | 0.1  | 308   | 316 | 0  | 30.4  | 29 | V | MPAWELYLG                         | N | 0.4   | 3.3  |              |
| 19  | Cg2403    | 2 | 1137.5414 | -1.0 | 6     | 15  | 0  | 32.0  | 27 | T | VGNNLDSRYT                        | M | -1.0  | 6.7  |              |
| 19  | Cg2403    | 1 | 1147.7944 | -1.3 | 206   | 216 | 0  | 25.0  | 13 | V | LIIPAILLGLI                       | A | 3.0   | 6.02 |              |
| 19  | Cg2403    | 1 | 1236.6754 | -2.7 | 64    | 74  | 0  | 35.9  | 26 | T | KVIYDGGYLPL                       | N | 0.4   | 6.62 |              |
| 19  | Cg2403    | 2 | 1238.5891 | 0.1  | 5     | 15  | 0  | 57.4  | 27 | A | TVGNNLDSRYT                       | M | -1.0  | 6.7  |              |
| 19  | Cg2403    | 2 | 1305.599  | 0.5  | 492   | 503 | 0  | 46.1  | 27 | T | RGGFFGPDPEDI                      | R | -0.8  | 3.7  |              |
| 19  | Cg2403    | 1 | 1333.6853 | -3.5 | 306   | 316 | 0  | 36.8  | 28 | A | RVMPAWELYLG                       | N | 0.3   | 6.88 |              |
| 19  | Cg2403    | 1 | 1344.6462 | -1.7 | 275   | 286 | 0  | 31.0  | 28 | I | NAIWNLGPYNPS                      | Q | -0.6  | 5.92 |              |
| 19  | Cg2403    | 1 | 1481.6497 | -2.4 | 292   | 304 | 0  | 35.4  | 25 | G | SQPDVYMLWTDGA                     | A | -0.3  | 2.92 |              |
| 19  | Cg2403    | 1 | 1538.6712 | -2.3 | 291   | 304 | 0  | 40.4  | 25 | A | GSQPDVYMLWTDGA                    | A | -0.4  | 2.92 |              |
| 19  | Cg2403    | 1 | 1571.7732 | -2.2 | 275   | 288 | 0  | 41.3  | 29 | I | NAIWNLGPYNPSQV                    | S | -0.5  | 5.92 |              |
| 19  | Cg2403    | 1 | 1626.7599 | -3.1 | 66    | 80  | 0  | 42.8  | 27 | V | IYDGGYLPLNGVEMS                   | R | 0.1   | 3    |              |
| 19  | Cg2403    | 1 | 1696.7403 | -2.4 | 289   | 304 | 0  | 46.3  | 24 | V | SAGSQPDVYMLWTDGA                  | A | -0.2  | 2.92 |              |
| 19  | Cg2403    | 1 | 1767.7774 | -1.6 | 289   | 305 | 0  | 33.4  | 24 | V | SAGSQPDVYMLWTDGAA                 | R | -0.1  | 2.92 |              |
| 19  | Cg2403    | 1 | 1853.9233 | -4.5 | 64    | 80  | 0  | 55.9  | 30 | T | KVIYDGGYLPLNGVEMS                 | R | 0.1   | 4.08 |              |
| 19  | Cg2403    | 2 | 2410.1077 | -1.4 | 482   | 503 | 0  | 93.2  | 27 | M | NQLGYAEVETRGFFGPDPEDI             | R | -0.7  | 3.5  |              |
| 19  | Cg2403    | 2 | 2476.254  | -3.1 | 451   | 472 | 0  | 51.2  | 30 | A | FIEVHQPLGPVDDHGHPIPLPY            | A | -0.3  | 5.02 |              |
| 19  | Cg2403    | 2 | 2604.3125 | -3.0 | 451   | 474 | 0  | 45.2  | 31 | A | FIEVHQPLGPVDDHGHPIPLPYAG          | A | -0.2  | 5.02 |              |
| 19  | Cg2403    | 2 | 2675.3496 | -3.0 | 451   | 475 | 0  | 49.6  | 30 | A | FIEVHQPLGPVDDHGHPIPLPYAGA         | A | -0.1  | 5.02 |              |
| 20  | Cg0953    | 1 | 613.2748  | 2.6  | 88    | 92  | 0  | 30.0  | 26 | G | YDGFL                             | Y | 0.3   | 3.1  |              |
| 20  | Cg0953    | 1 | 640.416   | 2.0  | 506   | 511 | 0  | 26.8  | 23 | G | LVS IPL                           | A | 2.3   | 6.02 |              |
| 20  | Cg0953    | 1 | 735.3803  | 1.1  | 265   | 270 | 0  | 42.3  | 30 | T | TQLDFI                            | S | 0.6   | 3.1  |              |
| 20  | Cg0953    | 2 | 754.4337  | 1.5  | 327   | 333 | 0  | 31.0  | 27 | A | LVGPDRV                           | I | 0.3   | 6.78 |              |
| 20  | Cg0953    | 1 | 827.4752  | 0.0  | 442   | 449 | 0  | 30.2  | 29 | A | SANLPTIL                          | Y | 0.9   | 6.02 |              |
| 20  | Cg0953    | 1 | 931.4803  | -0.6 | 494   | 501 | 0  | 30.3  | 29 | G | ADWAIFPL                          | K | 1.1   | 3.1  |              |
| 20  | Cg0953    | 1 | 1096.6645 | -1.3 | 498   | 507 | 0  | 27.5  | 24 | A | IFPLKNPGLV                        | S | 0.8   | 10.1 |              |
| 20  | Cg0953    | 1 | 1170.6033 | -2.9 | 382   | 392 | 0  | 38.0  | 27 | A | AVGHDIYNAVI                       | R | 0.8   | 4.94 |              |
| 20  | Cg0953    | 1 | 1187.6186 | -0.9 | 251   | 261 | 0  | 30.7  | 30 | T | QILEPGLQYGA                       | T | 0.0   | 3.3  |              |
| 20  | Cg0953    | 1 | 1386.6966 | -4.3 | 516   | 528 | 0  | 36.9  | 28 | A | GWIGTLVGKPDNM                     | D | -0.1  | 6.76 |              |
| 20  | Cg0953    | 2 | 1429.7161 | -1.7 | 391   | 403 | 0  | 65.2  | 29 | A | VIRNGQSTEAEQV                     | R | -0.7  | 4.26 |              |
| 20  | Cg0953    | 1 | 1800.8716 | -2.9 | 516   | 532 | 0  | 72.0  | 29 | A | GWIGTLVGKPDNMDDLA                 | A | -0.1  | 3.6  |              |
| 20  | Cg0953    | 1 | 1871.9088 | -4.9 | 516   | 533 | 0  | 43.7  | 29 | A | GWIGTLVGKPDNMDDLAA                | E | 0.0   | 3.6  |              |
| 20  | Cg0953    | 1 | 1945.9244 | -2.2 | 483   | 501 | 0  | 43.1  | 28 | A | VSGNDSAMVPGADWAIFPL               | K | 0.5   | 2.92 |              |
| 20  | Cg0953    | 1 | 1978.9888 | -1.7 | 247   | 264 | 0  | 53.3  | 29 | G | YDPTQILEPGLQYGATLT                | T | -0.3  | 3    |              |
| 20  | Cg0953    | 2 | 2360.1028 | -0.6 | 516   | 537 | 0  | 44.9  | 28 | A | GWIGTLVGKPDNMDDLAAEMEV            | R | -0.1  | 3.42 |              |
| 20  | Cg0953    | 2 | 2528.2255 | -1.5 | 380   | 403 | 0  | 68.7  | 30 | A | SAAVGHDIYNAVIRNGQSTEAEQV          | R | -0.3  | 4.42 |              |
| 20  | Cg0953    | 2 | 3366.7686 | -1.5 | 483   | 515 | 0  | 42.0  | 31 | A | VSGNDSAMVPGADWAIFPLKNPGLVSIPLAFIA | G | 0.8   | 3.88 |              |
| 21  | Cg1332    | 1 | 475.2101  | -4.6 | 220   | 224 | 0  | 33.4  | 27 | S | AMAPS                             | L | 0.6   | 6.02 |              |
| 21  | Cg1332    | 1 | 913.4181  | -1.4 | 112   | 118 | 0  | 34.4  | 25 | M | YQNYDLV                           | A | -0.7  | 3.1  |              |

| hit | accession | z | mass      | ppm  | start | end | mc | score | id | - | sequence                 | + | gravy | pl   | modification |
|-----|-----------|---|-----------|------|-------|-----|----|-------|----|---|--------------------------|---|-------|------|--------------|
| 21  | Cg1332    | 1 | 926.4709  | -0.4 | 360   | 368 | 0  | 27.8  | 27 | S | GQTPIPDVT                | D | -0.4  | 3.1  |              |
| 21  | Cg1332    | 1 | 949.4757  | -0.7 | 499   | 506 | 0  | 44.9  | 29 | I | NDIVVDYL                 | R | 0.6   | 2.92 |              |
| 21  | Cg1332    | 1 | 956.4491  | -0.5 | 416   | 423 | 0  | 45.2  | 25 | G | DVFDIYSV                 | K | 0.8   | 2.92 |              |
| 21  | Cg1332    | 1 | 1013.4706 | 0.5  | 415   | 423 | 0  | 31.6  | 26 | T | GDVFDIYSV                | K | 0.7   | 2.92 |              |
| 21  | Cg1332    | 1 | 1036.4106 | -0.9 | 299   | 308 | 0  | 24.6  | 20 | A | WAGQAGADMM               | T | 0.1   | 3.1  |              |
| 21  | Cg1332    | 1 | 1062.5597 | -0.1 | 498   | 506 | 0  | 39.2  | 28 | A | INDIVVDYL                | R | 1.0   | 2.92 |              |
| 21  | Cg1332    | 2 | 1176.639  | 0.8  | 184   | 194 | 0  | 32.0  | 27 | A | LGDDKISIFGL              | S | 0.6   | 3.88 |              |
| 21  | Cg1332    | 1 | 1208.4954 | 0.3  | 299   | 310 | 0  | 47.5  | 20 | A | WAGQAGADMMTA             | T | 0.1   | 3.1  |              |
| 21  | Cg1332    | 1 | 1213.5979 | -1.6 | 514   | 524 | 0  | 36.5  | 28 | A | TWVEGNTPTPI              | T | -0.4  | 3.3  |              |
| 21  | Cg1332    | 2 | 1215.5844 | -2.2 | 438   | 449 | 0  | 44.0  | 27 | T | SGRQPTDGSQLA             | V | -1.2  | 6.78 |              |
| 21  | Cg1332    | 2 | 1319.5742 | -0.3 | 170   | 180 | 0  | 36.0  | 23 | T | TDNTANDWERV              | R | -1.7  | 3.7  |              |
| 21  | Cg1332    | 2 | 1451.7045 | 0.1  | 266   | 277 | 0  | 65.0  | 28 | V | YQNWSNKIVAET             | G | -0.9  | 6.86 |              |
| 21  | Cg1332    | 2 | 1506.7175 | -0.5 | 483   | 498 | 0  | 46.8  | 28 | V | NGPGHGQSIGGTNQAI         | N | -0.7  | 7.84 |              |
| 21  | Cg1332    | 2 | 1533.7059 | 0.2  | 168   | 180 | 0  | 76.9  | 27 | S | LTTDNTANDWERV            | R | -1.2  | 3.7  |              |
| 21  | Cg1332    | 2 | 1593.7496 | -0.9 | 481   | 497 | 0  | 49.7  | 27 | V | TVNGPGHGQSIGGTNQA        | I | -0.7  | 7.84 |              |
| 21  | Cg1332    | 2 | 1620.738  | -0.7 | 167   | 180 | 0  | 44.8  | 26 | S | SLTTDNTANDWERV           | R | -1.1  | 3.7  |              |
| 21  | Cg1332    | 2 | 1694.79   | 0.5  | 509   | 524 | 0  | 36.9  | 27 | T | GHTDATWVEGNTPTPI         | T | -0.7  | 4.06 |              |
| 21  | Cg1332    | 2 | 1707.77   | -0.6 | 166   | 180 | 0  | 86.8  | 26 | T | SSLTTDNTANDWERV          | R | -1.1  | 3.7  |              |
| 21  | Cg1332    | 2 | 2132.9803 | 0.3  | 233   | 250 | 0  | 35.7  | 27 | A | SQEQQYKNSLNDFFTWVA       | E | -0.8  | 4.08 |              |
| 21  | Cg1332    | 2 | 2438.1826 | 0.0  | 483   | 506 | 0  | 64.6  | 30 | V | NGPGHGQSIGGTNQAINDIVVDYL | R | -0.3  | 3.88 |              |
| 21  | Cg1332    | 2 | 2487.1376 | 0.0  | 454   | 475 | 0  | 35.3  | 27 | L | LLQGTSDPQTPYWITHNELADAM  | N | -0.7  | 3.7  |              |
| 22  | Cg1656    | 1 | 759.3915  | 1.3  | 414   | 420 | 0  | 34.2  | 28 | I | SWGLNAL                  | S | 0.5   | 6.02 |              |
| 22  | Cg1656    | 1 | 907.4287  | -0.7 | 338   | 345 | 0  | 36.0  | 30 | S | GEYVAEQI                 | E | -0.2  | 3.12 |              |
| 22  | Cg1656    | 1 | 960.4665  | 0.1  | 323   | 331 | 0  | 45.7  | 28 | M | NYNNLPGVA                | Q | -0.4  | 5.92 |              |
| 22  | Cg1656    | 1 | 970.4648  | -0.2 | 108   | 115 | 0  | 64.2  | 25 | V | FEYDSLIV                 | G | 0.7   | 3    |              |
| 22  | Cg1656    | 1 | 1031.4957 | -1.0 | 182   | 191 | 0  | 39.1  | 29 | V | ELAGQLAEMA               | H | 0.4   | 3.12 |              |
| 22  | Cg1656    | 2 | 1141.6343 | 1.1  | 281   | 291 | 0  | 38.9  | 28 | A | SPLGKLVAEQT              | G | -0.1  | 6.94 |              |
| 22  | Cg1656    | 2 | 1156.5149 | -2.3 | 196   | 205 | 0  | 54.7  | 24 | L | AGEYKNFNTN               | S | -1.6  | 6.86 |              |
| 22  | Cg1656    | 2 | 1179.4907 | 0.9  | 360   | 369 | 0  | 35.0  | 23 | A | FDYFDKGSMA               | T | -0.4  | 3.88 |              |
| 22  | Cg1656    | 2 | 1269.5989 | -0.7 | 195   | 205 | 0  | 28.5  | 27 | T | LAGEYKNFNTN              | S | -1.1  | 6.86 |              |
| 22  | Cg1656    | 2 | 1274.6103 | -2.4 | 287   | 298 | 0  | 55.5  | 27 | L | VAEQTGVETDRA             | G | -0.7  | 3.82 |              |
| 22  | Cg1656    | 1 | 1306.6405 | -1.7 | 334   | 345 | 0  | 34.3  | 29 | V | AIQSGEYVAEQI             | E | 0.0   | 3.12 |              |
| 22  | Cg1656    | 2 | 1314.584  | -0.5 | 196   | 207 | 0  | 25.6  | 25 | L | AGEYKNFNTNSA             | K | -1.2  | 6.86 |              |
| 22  | Cg1656    | 2 | 1470.6204 | 0.3  | 123   | 135 | 0  | 30.7  | 22 | S | YFGNDHFAEFAPG            | M | -0.4  | 4.06 |              |
| 22  | Cg1656    | 2 | 1532.7141 | 0.2  | 302   | 315 | 0  | 84.7  | 28 | V | MVNDDLSVGDQKNV           | F | -0.6  | 3.6  |              |
| 22  | Cg1656    | 2 | 1569.8475 | -0.8 | 70    | 83  | 0  | 60.8  | 28 | S | TRQILGSQENVNVI           | K | -0.2  | 6.98 |              |
| 22  | Cg1656    | 2 | 2312.0487 | -1.2 | 302   | 322 | 0  | 72.5  | 25 | V | MVNDDLSVGDQKNVFFVGDMM    | N | 0.2   | 3.42 |              |
| 23  | Cg1363    | 1 | 584.3897  | 1.5  | 71    | 76  | 0  | 31.7  | 31 | A | LIGLVA                   | G | 3.0   | 6.02 |              |
| 23  | Cg1363    | 1 | 625.3799  | -1.0 | 28    | 34  | 0  | 27.6  | 27 | T | IGPGLGI                  | G | 1.4   | 6.02 |              |
| 23  | Cg1363    | 1 | 795.4854  | 0.5  | 28    | 36  | 0  | 33.4  | 24 | T | IGPGLGIGI                | L | 1.6   | 6.02 |              |

| hit | accession | z | mass      | ppm  | start | end | mc | score | id | - | sequence                    | + | gravy | pl   | modification  |
|-----|-----------|---|-----------|------|-------|-----|----|-------|----|---|-----------------------------|---|-------|------|---------------|
| 23  | Cg1363    | 1 | 797.4647  | 0.0  | 24    | 32  | 0  | 29.9  | 27 | Y | GIATIGPGL                   | G | 1.2   | 6.02 |               |
| 23  | Cg1363    | 1 | 818.4538  | 0.6  | 62    | 69  | 0  | 34.1  | 29 | L | GIAFVEAL                    | A | 1.9   | 3.3  |               |
| 23  | Cg1363    | 2 | 967.5702  | 2.3  | 26    | 36  | 0  | 35.0  | 25 | I | ATIGPGLGIGI                 | L | 1.4   | 6.02 |               |
| 23  | Cg1363    | 1 | 1165.7071 | 0.1  | 27    | 39  | 0  | 21.0  | 21 | A | TIGPGLGIGILVG               | K | 1.6   | 6.02 |               |
| 23  | Cg1363    | 1 | 1191.6499 | 0.1  | 14    | 26  | 0  | 29.4  | 27 | S | TITGLGAVGYGIA               | T | 1.3   | 5.92 |               |
| 23  | Cg1363    | 2 | 1231.5689 | -0.3 | 42    | 52  | 0  | 38.0  | 26 | A | LEGMARQPEMA                 | G | -0.5  | 4.26 |               |
| 23  | Cg1363    | 2 | 1247.5638 | -0.4 | 42    | 52  | 0  | 52.5  | 26 | A | LEGMARQPEMA                 | G | -0.5  | 4.26 | Oxidation (M) |
| 23  | Cg1363    | 2 | 1364.8391 | 0.5  | 27    | 41  | 0  | 51.2  | 20 | A | TIGPGLGIGILVGKA             | L | 1.3   | 10.1 |               |
| 23  | Cg1363    | 2 | 1435.8763 | 0.8  | 26    | 41  | 0  | 45.7  | 19 | I | ATIGPGLGIGILVGKA            | L | 1.3   | 10.1 |               |
| 23  | Cg1363    | 1 | 1487.7224 | -3.0 | 39    | 52  | 0  | 44.2  | 28 | V | GKALEGMARQPEMA              | G | -0.6  | 7.1  |               |
| 23  | Cg1363    | 2 | 1663.9873 | -1.0 | 27    | 44  | 0  | 44.0  | 21 | A | TIGPGLGIGILVGKALEG          | M | 1.0   | 6.94 |               |
| 23  | Cg1363    | 2 | 1699.8749 | -0.5 | 37    | 52  | 0  | 33.3  | 29 | I | LVGKALEGMARQPEMA            | G | 0.0   | 7.1  |               |
| 23  | Cg1363    | 2 | 1866.0649 | -1.2 | 27    | 46  | 0  | 77.7  | 25 | A | TIGPGLGIGILVGKALEGMA        | R | 1.1   | 6.94 |               |
| 23  | Cg1363    | 2 | 1869.9804 | -1.6 | 35    | 52  | 0  | 65.3  | 30 | I | GILVGKALEGMARQPEMA          | G | 0.2   | 7.1  |               |
| 23  | Cg1363    | 2 | 1937.102  | -1.9 | 26    | 46  | 0  | 39.2  | 26 | I | ATIGPGLGIGILVGKALEGMA       | R | 1.2   | 6.94 |               |
| 23  | Cg1363    | 2 | 2040.086  | -0.2 | 33    | 52  | 0  | 39.7  | 29 | L | GIGILVGKALEGMARQPEMA        | G | 0.4   | 7.1  |               |
| 23  | Cg1363    | 2 | 2364.2657 | -1.9 | 29    | 52  | 0  | 73.3  | 29 | I | GPGLGIGILVGKALEGMARQPEMA    | G | 0.4   | 7.1  |               |
| 23  | Cg1363    | 2 | 2578.3975 | -2.5 | 27    | 52  | 0  | 86.1  | 29 | A | TIGPGLGIGILVGKALEGMARQPEMA  | G | 0.5   | 7.1  |               |
| 23  | Cg1363    | 2 | 2649.4346 | -2.6 | 26    | 52  | 0  | 57.2  | 29 | I | ATIGPGLGIGILVGKALEGMARQPEMA | G | 0.6   | 7.1  |               |
| 24  | Cg0683    | 1 | 526.3115  | 0.8  | 8     | 12  | 0  | 32.0  | 30 | A | NPLIA                       | L | 1.0   | 6.02 |               |
| 24  | Cg0683    | 1 | 551.3683  | 0.9  | 373   | 377 | 0  | 34.3  | 18 | A | IPIPL                       | P | 1.9   | 6.02 |               |
| 24  | Cg0683    | 1 | 648.421   | -0.3 | 373   | 378 | 0  | 14.7  | 14 | A | IPIPLP                      | G | 1.3   | 6.02 |               |
| 24  | Cg0683    | 1 | 651.3666  | 0.6  | 92    | 96  | 0  | 24.1  | 17 | I | FMLLL                       | L | 3.2   | 6.02 | Oxidation (M) |
| 24  | Cg0683    | 1 | 679.4268  | -1.5 | 371   | 377 | 0  | 23.0  | 21 | L | GAIPIPL                     | P | 1.6   | 6.02 |               |
| 24  | Cg0683    | 1 | 982.5158  | -2.4 | 374   | 383 | 0  | 28.5  | 25 | I | PIPLPGGTTM                  | S | 0.3   | 6.02 |               |
| 24  | Cg0683    | 1 | 1155.6023 | -2.9 | 137   | 147 | 0  | 49.1  | 28 | V | ELIEGIDPSLA                 | S | 0.5   | 2.94 |               |
| 24  | Cg0683    | 1 | 1172.7533 | -0.6 | 368   | 379 | 0  | 32.1  | 14 | G | LLLGAIPIPLPG                | G | 1.7   | 6.02 |               |
| 24  | Cg0683    | 1 | 1238.5779 | -2.8 | 496   | 507 | 0  | 27.1  | 26 | I | SYLNGQTGTDLA                | N | -0.5  | 3.1  |               |
| 24  | Cg0683    | 1 | 1275.8166 | -0.9 | 365   | 377 | 0  | 30.7  | 14 | L | SLGLLLGAIPIPL               | P | 1.9   | 6.02 |               |
| 24  | Cg0683    | 2 | 1288.7867 | -1.6 | 395   | 407 | 0  | 22.3  | 20 | A | GLILGALKHTGPL               | T | 0.8   | 10.1 |               |
| 24  | Cg0683    | 1 | 1320.8017 | -0.5 | 352   | 364 | 0  | 22.0  | 20 | S | LADVNLPLAIGL                | S | 1.7   | 3.1  |               |
| 24  | Cg0683    | 1 | 1429.8908 | -1.6 | 365   | 379 | 0  | 41.2  | 14 | L | SLGLLLGAIPIPLPG             | G | 1.5   | 6.02 |               |
| 24  | Cg0683    | 1 | 1587.96   | -2.0 | 365   | 381 | 0  | 37.1  | 19 | L | SLGLLLGAIPIPLPGGT           | T | 1.3   | 6.02 |               |
| 24  | Cg0683    | 1 | 1599.9964 | -2.6 | 363   | 379 | 0  | 48.2  | 15 | I | GLSLGLLLGAIPIPLPG           | G | 1.6   | 6.02 |               |
| 24  | Cg0683    | 1 | 1758.0655 | -0.6 | 363   | 381 | 0  | 60.8  | 18 | I | GLSLGLLLGAIPIPLPGGT         | T | 1.3   | 6.02 |               |
| 24  | Cg0683    | 1 | 1820.0481 | -2.1 | 365   | 383 | 0  | 39.2  | 25 | L | SLGLLLGAIPIPLPGGTTM         | S | 1.2   | 6.02 |               |
| 24  | Cg0683    | 1 | 1990.1537 | -3.9 | 363   | 383 | 0  | 73.3  | 24 | I | GLSLGLLLGAIPIPLPGGTTM       | S | 1.3   | 6.02 |               |
| 24  | Cg0683    | 3 | 2980.5063 | 0.5  | 235   | 262 | 0  | 63.0  | 31 | L | ADPDLPIEGMELLINGTEEAVDRAIKA | L | -0.1  | 3.68 |               |
| 25  | Cg1603    | 1 | 640.3544  | 0.5  | 298   | 304 | 0  | 26.2  | 26 | I | VNVGGPV                     | T | 1.0   | 6.02 |               |
| 25  | Cg1603    | 1 | 854.4862  | -1.4 | 298   | 306 | 0  | 31.4  | 26 | I | VNVGGPVTL                   | D | 1.1   | 6.02 |               |

| hit | accession | z | mass      | ppm  | start | end | mc | score | id | - | sequence                    | + | gravy | pl    | modification  |
|-----|-----------|---|-----------|------|-------|-----|----|-------|----|---|-----------------------------|---|-------|-------|---------------|
| 25  | Cg1603    | 1 | 1000.4436 | -1.7 | 290   | 297 | 0  | 46.0  | 23 | A | DFHNPQMI                    | V | -0.8  | 4.94  |               |
| 25  | Cg1603    | 1 | 1158.5768 | 1.0  | 212   | 223 | 0  | 29.2  | 28 | I | GVDGAADTLVEL                | G | 0.6   | 2.88  |               |
| 25  | Cg1603    | 2 | 1449.6008 | 0.1  | 307   | 319 | 0  | 35.8  | 20 | L | DGVFENRESDPA                | A | -1.5  | 3.42  |               |
| 25  | Cg1603    | 2 | 1663.7326 | 0.5  | 305   | 319 | 0  | 34.5  | 25 | V | TLDGVFENRESDPA              | A | -1.1  | 3.42  |               |
| 25  | Cg1603    | 2 | 1710.8901 | 0.1  | 167   | 183 | 0  | 32.7  | 29 | I | DGLGIPDTGNAIEGRKV           | L | -0.4  | 4.3   |               |
| 25  | Cg1603    | 2 | 2070.968  | -1.3 | 138   | 155 | 0  | 65.6  | 28 | A | DAQQSLLDRMEAYFGNTI          | Q | -0.5  | 3.7   |               |
| 25  | Cg1603    | 2 | 2289.0736 | -0.8 | 136   | 155 | 0  | 91.8  | 28 | A | FADAQQSLLDRMEAYFGNTI        | Q | -0.2  | 3.7   |               |
| 25  | Cg1603    | 2 | 2446.2679 | -1.6 | 67    | 89  | 0  | 80.2  | 31 | S | RFTTGSVPNFGPQMLIDGGIQLV     | E | 0.3   | 6.78  |               |
| 25  | Cg1603    | 2 | 2539.3394 | -3.3 | 247   | 271 | 0  | 66.3  | 30 | A | NVILPADPDGHAVGLERIQDLGIGA   | M | 0.2   | 3.96  |               |
| 25  | Cg1603    | 3 | 2571.3656 | -1.9 | 159   | 183 | 0  | 43.3  | 30 | I | HSEAPLLIDGLIPDTGNAIEGRKV    | L | -0.1  | 4.54  |               |
| 25  | Cg1603    | 2 | 2589.254  | -1.8 | 376   | 397 | 0  | 59.9  | 30 | G | SFTDNLIDTWNFSALTQQGWFK      | - | 0.0   | 3.88  |               |
| 25  | Cg1603    | 2 | 2667.398  | -0.9 | 245   | 271 | 0  | 70.0  | 30 | S | GANVILPADPDGHAVGLERIQDLGIGA | M | 0.2   | 3.96  |               |
| 25  | Cg1603    | 2 | 2677.2846 | -1.3 | 136   | 158 | 0  | 49.1  | 29 | A | FADAQQSLLDRMEAYFGNTIQFI     | H | 0.0   | 3.7   |               |
| 26  | Cg3186    | 1 | 810.3759  | -0.2 | 256   | 262 | 0  | 39.6  | 27 | A | NTDVVIS                     | A | -0.2  | 3.1   |               |
| 26  | Cg3186    | 1 | 861.4344  | -0.5 | 293   | 299 | 0  | 33.2  | 29 | T | STRIWEA                     | K | -0.6  | 6.98  |               |
| 26  | Cg3186    | 1 | 885.4994  | 0.5  | 118   | 125 | 0  | 40.5  | 29 | N | NITLVMPV                    | G | 1.6   | 6.02  |               |
| 26  | Cg3186    | 1 | 888.4341  | 0.8  | 104   | 111 | 0  | 38.3  | 28 | A | WLVDTNAA                    | R | 0.4   | 3.1   |               |
| 26  | Cg3186    | 1 | 897.5032  | -0.7 | 302   | 309 | 0  | 30.9  | 24 | A | RLQGLNPT                    | A | -0.8  | 11.04 |               |
| 26  | Cg3186    | 2 | 916.48    | 1.4  | 331   | 338 | 0  | 26.0  | 26 | T | QGRVLDVM                    | N | 0.3   | 6.78  |               |
| 26  | Cg3186    | 1 | 928.4     | 0.2  | 310   | 317 | 0  | 24.1  | 24 | T | ADYPMYGI                    | H | 0.0   | 3.1   |               |
| 26  | Cg3186    | 1 | 1073.5142 | -0.4 | 102   | 111 | 0  | 67.9  | 28 | S | NAWLVDTNAA                  | R | 0.1   | 3.1   |               |
| 26  | Cg3186    | 1 | 1100.4563 | -0.7 | 131   | 139 | 0  | 43.4  | 21 | S | FYADWNSQA                   | S | -0.8  | 3.1   |               |
| 26  | Cg3186    | 2 | 1121.5465 | -0.5 | 322   | 330 | 0  | 40.0  | 28 | A | QFNSQLERT                   | Q | -1.5  | 6.98  |               |
| 26  | Cg3186    | 2 | 1134.6509 | -0.1 | 72    | 81  | 0  | 33.0  | 23 | G | RNIPVQIQPA                  | G | -0.3  | 11.04 |               |
| 26  | Cg3186    | 1 | 1159.5146 | -2.5 | 265   | 275 | 0  | 27.8  | 24 | A | SGLWSPQDDGV                 | R | -0.7  | 2.92  |               |
| 26  | Cg3186    | 1 | 1218.5631 | -0.7 | 148   | 156 | 0  | 34.8  | 27 | V | IYMWETFLT                   | Q | 0.7   | 3.3   | Oxidation (M) |
| 26  | Cg3186    | 2 | 1414.6841 | 0.6  | 265   | 277 | 0  | 52.0  | 28 | A | SGLWSPQDDGVRV               | D | -0.6  | 3.88  |               |
| 26  | Cg3186    | 2 | 1485.7212 | 0.2  | 264   | 277 | 0  | 39.9  | 28 | A | ASGLWSPQDDGVRV              | D | -0.4  | 3.88  |               |
| 27  | Cg0413    | 1 | 585.2435  | 0.2  | 205   | 209 | 0  | 23.4  | 23 | G | FYDAA                       | A | 0.3   | 3.1   |               |
| 27  | Cg0413    | 1 | 777.348   | 0.3  | 116   | 121 | 0  | 38.8  | 26 | A | NWVMQT                      | D | -0.4  | 6.02  |               |
| 27  | Cg0413    | 1 | 900.4454  | -1.0 | 332   | 338 | 0  | 30.0  | 27 | A | DWNLRPT                     | G | -1.6  | 6.78  |               |
| 27  | Cg0413    | 1 | 926.4458  | -1.4 | 93    | 101 | 0  | 26.3  | 24 | A | DESAGPRPV                   | I | -1.1  | 4.08  |               |
| 27  | Cg0413    | 1 | 974.4193  | -0.5 | 46    | 55  | 0  | 31.7  | 24 | T | ISDSAPADEA                  | S | -0.4  | 2.88  |               |
| 27  | Cg0413    | 1 | 1000.4138 | 0.4  | 248   | 255 | 0  | 26.9  | 23 | G | EYNIYNDA                    | L | -1.3  | 3     |               |
| 27  | Cg0413    | 2 | 1019.5328 | 0.4  | 220   | 227 | 0  | 35.7  | 29 | S | SLLPWEYL                    | K | 0.4   | 3.3   |               |
| 27  | Cg0413    | 1 | 1033.4716 | -1.1 | 273   | 282 | 0  | 33.9  | 28 | A | SGLAGEWESV                  | D | -0.1  | 3.12  |               |
| 27  | Cg0413    | 1 | 1075.4669 | -1.2 | 45    | 55  | 0  | 35.2  | 25 | S | TISDSAPADEA                 | S | -0.4  | 2.88  |               |
| 27  | Cg0413    | 2 | 1098.5305 | -1.5 | 91    | 101 | 0  | 80.9  | 25 | I | TADESAGPRPV                 | I | -0.8  | 4.08  |               |
| 27  | Cg0413    | 1 | 1135.5332 | 0.9  | 154   | 163 | 0  | 29.7  | 29 | A | SLGGKQMWET                  | F | -0.8  | 6.94  |               |
| 27  | Cg0413    | 2 | 1141.592  | 0.5  | 195   | 204 | 0  | 35.6  | 28 | T | SLLFPQHFPG                  | F | 0.2   | 7.84  |               |

| hit | accession | z | mass      | ppm  | start | end | mc | score | id | - | sequence                       | + | gravy | pl   | modification  |
|-----|-----------|---|-----------|------|-------|-----|----|-------|----|---|--------------------------------|---|-------|------|---------------|
| 27  | Cg0413    | 2 | 1154.6482 | 0.4  | 81    | 90  | 0  | 36.6  | 25 | S | MDRNVPLVVI                     | T | 1.0   | 6.78 |               |
| 27  | Cg0413    | 2 | 1211.6146 | 0.0  | 90    | 101 | 0  | 30.3  | 27 | V | ITADESAGPRPV                   | I | -0.4  | 4.08 |               |
| 27  | Cg0413    | 2 | 1251.7074 | 0.6  | 167   | 177 | 0  | 52.1  | 24 | V | KELPGPLEEKL                    | N | -1.0  | 4.56 |               |
| 27  | Cg0413    | 1 | 1288.5248 | -0.2 | 144   | 153 | 0  | 32.4  | 20 | S | YYTDWVEENA                     | S | -1.2  | 2.94 |               |
| 27  | Cg0413    | 2 | 1347.6089 | -1.3 | 230   | 241 | 0  | 31.4  | 26 | L | TLDRGNATPEQM                   | W | -1.2  | 4.08 | Oxidation (M) |
| 27  | Cg0413    | 2 | 1353.6816 | 0.5  | 122   | 132 | 0  | 68.3  | 28 | T | DVLDFFYLEKNV                   | N | 0.0   | 3.7  |               |
| 27  | Cg0413    | 2 | 1549.695  | 1.1  | 345   | 356 | 0  | 51.7  | 26 | G | WWQDDLGRGSWTT                  | F | -1.4  | 3.88 |               |
| 27  | Cg0413    | 2 | 1610.9283 | -0.1 | 164   | 177 | 0  | 56.7  | 25 | T | FLVKELPGPLEEKL                 | N | 0.0   | 4.56 |               |
| 27  | Cg0413    | 2 | 1650.7202 | -0.3 | 141   | 153 | 0  | 32.8  | 24 | G | KFSYYTDWVEENA                  | S | -1.1  | 3.82 |               |
| 27  | Cg0413    | 2 | 1708.825  | 0.1  | 195   | 209 | 0  | 29.3  | 28 | T | SLLFQHFPGFYDAA                 | A | 0.2   | 4.94 |               |
| 28  | Cg3365    | 1 | 583.4309  | -0.2 | 447   | 451 | 0  | 24.1  | 18 | L | ILLLI                          | I | 4.1   | 6.02 |               |
| 28  | Cg3365    | 1 | 651.3665  | 0.6  | 240   | 244 | 0  | 24.1  | 17 | I | MYIIL                          | A | 2.7   | 5.92 |               |
| 28  | Cg3365    | 1 | 674.4367  | 1.5  | 20    | 25  | 0  | 25.0  | 24 | A | FLIGII                         | T | 3.3   | 6.02 |               |
| 28  | Cg3365    | 1 | 707.4582  | 2.0  | 363   | 369 | 0  | 20.9  | 16 | L | ILPGLVP                        | H | 1.8   | 6.02 |               |
| 28  | Cg3365    | 1 | 775.4844  | 0.9  | 20    | 26  | 0  | 35.6  | 23 | A | FLIGIIT                        | A | 2.7   | 6.02 |               |
| 28  | Cg3365    | 1 | 794.5266  | 0.0  | 361   | 368 | 0  | 21.5  | 21 | V | ALILPGLV                       | P | 2.5   | 6.02 |               |
| 28  | Cg3365    | 1 | 835.3613  | -0.2 | 471   | 477 | 0  | 23.9  | 23 | G | HWDPAPN                        | R | -1.8  | 4.94 |               |
| 28  | Cg3365    | 1 | 943.5379  | -1.3 | 7     | 14  | 0  | 50.7  | 29 | I | PLFLVNEI                       | L | 1.3   | 3.3  |               |
| 28  | Cg3365    | 1 | 948.5281  | 0.5  | 339   | 348 | 0  | 34.6  | 28 | S | SFVGGLVGLT                     | V | 1.6   | 6.02 |               |
| 28  | Cg3365    | 2 | 1009.6536 | 0.6  | 151   | 161 | 0  | 27.0  | 21 | I | VVGVGALLLI                     | L | 2.6   | 6.02 |               |
| 28  | Cg3365    | 1 | 1423.8228 | -2.9 | 361   | 373 | 0  | 40.8  | 24 | V | ALILPGLVPHFFT                  | G | 1.5   | 7.84 |               |
| 28  | Cg3365    | 1 | 1425.7405 | 1.2  | 365   | 379 | 0  | 43.1  | 28 | L | PGLVPHFFTGAAGV                 | Y | 0.8   | 7.84 |               |
| 28  | Cg3365    | 1 | 1477.6979 | -2.8 | 64    | 78  | 0  | 42.0  | 28 | A | SLEPLGAMIMGATGM                | R | 0.9   | 3.3  |               |
| 28  | Cg3365    | 1 | 1742.9607 | -2.0 | 319   | 334 | 0  | 42.8  | 28 | A | LDAPIVFPYAQNAVLI               | G | 1.1   | 3.1  |               |
| 28  | Cg3365    | 1 | 1836.0298 | -4.0 | 361   | 379 | 0  | 66.1  | 27 | V | ALILPGLVPHFFTGAAGV             | Y | 1.4   | 7.84 |               |
| 29  | Cg1081    | 1 | 773.4171  | 2.3  | 9     | 15  | 0  | 35.5  | 28 | A | IDVTDLV                        | R | 1.3   | 2.92 |               |
| 29  | Cg1081    | 2 | 909.5647  | 0.8  | 78    | 85  | 0  | 43.9  | 22 | A | ILRPELGI                       | M | 0.8   | 6.98 |               |
| 29  | Cg1081    | 1 | 959.5175  | 0.2  | 49    | 57  | 0  | 40.1  | 29 | T | STLEVIEGL                      | S | 0.8   | 3.12 |               |
| 29  | Cg1081    | 1 | 1099.6125 | 0.0  | 116   | 125 | 0  | 43.5  | 28 | I | KDVLADVDLL                     | H | 0.7   | 3.6  |               |
| 29  | Cg1081    | 1 | 1399.7824 | -3.8 | 230   | 242 | 0  | 60.4  | 28 | I | SFVLRGGQVELPV                  | L | 0.6   | 6.98 |               |
| 29  | Cg1081    | 2 | 1485.8402 | -0.9 | 217   | 229 | 0  | 45.2  | 27 | G | TLDELVAREKSII                  | S | 0.2   | 4.44 |               |
| 29  | Cg1081    | 2 | 1671.9043 | -2.3 | 215   | 229 | 0  | 33.9  | 29 | V | EGTDELVAREKSII                 | S | -0.1  | 4.16 |               |
| 29  | Cg1081    | 2 | 1779.9917 | -1.0 | 78    | 94  | 0  | 39.8  | 27 | A | ILRPELGIMLQSGGLPS              | Q | 0.5   | 6.98 |               |
| 29  | Cg1081    | 1 | 1799.8942 | -2.3 | 9     | 24  | 0  | 35.8  | 29 | A | IDVTDLVRTYGDYTAV               | K | 0.2   | 3.6  |               |
| 29  | Cg1081    | 2 | 1842.0098 | -1.8 | 213   | 229 | 0  | 38.7  | 28 | I | AVEGTLDELVAREKSII              | S | 0.3   | 4.16 |               |
| 29  | Cg1081    | 2 | 2021.1343 | -2.8 | 78    | 96  | 0  | 33.5  | 27 | A | ILRPELGIMLQSGGLPSQL            | T | 0.5   | 6.98 |               |
| 29  | Cg1081    | 2 | 2169.0511 | -0.5 | 289   | 308 | 0  | 64.9  | 29 | A | TLESVFMDIASLENTSLQTA           | - | 0.3   | 2.94 |               |
| 29  | Cg1081    | 2 | 3181.6659 | -2.4 | 259   | 288 | 0  | 78.4  | 31 | A | TTTLQQHTLEILTWAAETGIALEGFAAKPA | T | 0.2   | 4.54 |               |
| 30  | Cg0737    | 1 | 656.3745  | 0.9  | 117   | 122 | 0  | 26.5  | 26 | S | SEIVPL                         | A | 1.1   | 3.3  |               |
| 30  | Cg0737    | 1 | 795.3399  | -1.0 | 102   | 109 | 0  | 28.1  | 24 | A | EYNVGSGA                       | D | -0.5  | 3.3  |               |

| hit | accession | z | mass      | ppm  | start | end  | mc | score | id | - | sequence                   | + | gravy | pl   | modification  |
|-----|-----------|---|-----------|------|-------|------|----|-------|----|---|----------------------------|---|-------|------|---------------|
| 30  | Cg0737    | 1 | 894.4236  | -0.1 | 258   | 264  | 0  | 34.1  | 27 | L | WHDPEVL                    | A | -0.7  | 4.06 |               |
| 30  | Cg0737    | 2 | 935.4461  | -0.2 | 207   | 214  | 0  | 38.3  | 27 | I | NNSFLDRA                   | G | -0.9  | 6.78 |               |
| 30  | Cg0737    | 1 | 982.388   | -1.4 | 75    | 83   | 0  | 26.0  | 21 | F | SDYSTPNEA                  | L | -1.5  | 3    |               |
| 30  | Cg0737    | 2 | 1078.6387 | -0.3 | 165   | 175  | 0  | 38.4  | 23 | L | KTPGLVTPAPV                | D | 0.3   | 10.1 |               |
| 30  | Cg0737    | 2 | 1098.5305 | -1.5 | 278   | 287  | 0  | 32.0  | 25 | P | VDRPGADLQE                 | I | -1.1  | 3.7  |               |
| 30  | Cg0737    | 2 | 1167.5632 | -1.9 | 143   | 153  | 0  | 52.2  | 28 | I | PNDPSNQGRAI                | N | -1.5  | 6.78 |               |
| 30  | Cg0737    | 1 | 1226.5091 | -0.3 | 73    | 83   | 0  | 29.8  | 23 | V | PFSDYSTPNEA                | L | -1.2  | 3    |               |
| 30  | Cg0737    | 2 | 1280.6473 | -0.2 | 142   | 153  | 0  | 41.9  | 28 | A | IPNDPSNQGRAI               | N | -1.0  | 6.78 |               |
| 30  | Cg0737    | 2 | 1351.6844 | -0.1 | 141   | 153  | 0  | 48.8  | 28 | V | AIPNDPSNQGRAI              | N | -0.8  | 6.78 |               |
| 30  | Cg0737    | 2 | 1504.8038 | -1.4 | 253   | 264  | 0  | 42.3  | 28 | A | RLVELWHDPEVL               | A | -0.1  | 4.42 |               |
| 30  | Cg0737    | 2 | 1621.8563 | 0.3  | 165   | 180  | 0  | 39.0  | 28 | L | KTPGLVTPAPVDIDEA           | A | 0.0   | 3.7  |               |
| 30  | Cg0737    | 2 | 1652.8522 | 0.5  | 84    | 97   | 0  | 67.2  | 28 | A | LAQDQLDVNLFQHL             | K | 0.0   | 3.88 |               |
| 30  | Cg0737    | 2 | 1980.8476 | -0.5 | 222   | 238  | 0  | 26.4  | 22 | A | VFEDDPESEEAEPYINV          | F | -0.9  | 2.74 |               |
| 30  | Cg0737    | 2 | 2328.0322 | 0.0  | 222   | 241  | 0  | 29.7  | 24 | A | VFEDDPESEEAEPYINVVFT       | K | -0.5  | 2.74 |               |
| 30  | Cg0737    | 3 | 2367.1302 | 0.4  | 279   | 299  | 0  | 43.7  | 29 | V | DRPGADLQEILDRLEADQENA      | - | -1.2  | 3.62 |               |
| 30  | Cg0737    | 2 | 2857.3181 | 0.2  | 58    | 83   | 0  | 53.8  | 27 | V | FEDKAAEEGITLDIVPFSDYSTPNEA | L | -0.5  | 3.32 |               |
| 31  | Cg1368    | 1 | 963.3822  | -1.0 | 322   | 330  | 0  | 25.7  | 22 | A | DDYTDPA                    | T | -1.3  | 2.82 |               |
| 31  | Cg1368    | 1 | 993.5019  | -1.4 | 437   | 445  | 0  | 32.6  | 27 | G | SYVPLTDTV                  | D | 0.4   | 3.1  |               |
| 31  | Cg1368    | 1 | 1157.5863 | -2.0 | 73    | 84   | 0  | 28.8  | 28 | I | AMAPTDGLVRGA               | A | 0.4   | 6.78 |               |
| 31  | Cg1368    | 2 | 1173.5812 | 0.5  | 73    | 84   | 0  | 36.1  | 28 | I | AMAPTDGLVRGA               | A | 0.4   | 6.78 | Oxidation (M) |
| 31  | Cg1368    | 1 | 1228.6088 | -3.3 | 28    | 38   | 0  | 39.4  | 27 | V | DVEFPRGELPA                | L | -0.5  | 3.82 |               |
| 31  | Cg1368    | 2 | 1256.5997 | -0.2 | 335   | 345  | 0  | 59.4  | 27 | A | HLDATTELDRS                | I | -1.0  | 4.3  |               |
| 31  | Cg1368    | 1 | 1264.5493 | -4.6 | 399   | 409  | 0  | 36.6  | 24 | L | GMDLSEEDKI                 | T | -1.1  | 3.5  |               |
| 31  | Cg1368    | 1 | 1326.6721 | -3.5 | 418   | 428  | 0  | 31.3  | 28 | I | ERFLGQNFFVA                | E | 0.3   | 6.98 |               |
| 31  | Cg1368    | 2 | 1372.702  | 0.8  | 292   | 303  | 0  | 34.3  | 30 | T | LADEMGVLQERI               | T | 0.1   | 3.82 |               |
| 31  | Cg1368    | 1 | 1377.6333 | -1.5 | 398   | 409  | 0  | 49.2  | 27 | I | LGMDELSEEDKI               | T | -0.7  | 3.5  |               |
| 31  | Cg1368    | 2 | 1426.7456 | 0.9  | 26    | 38   | 0  | 63.7  | 29 | A | VVDVEFPRGELPA              | L | 0.2   | 3.82 |               |
| 31  | Cg1368    | 2 | 1440.7209 | 0.6  | 335   | 347  | 0  | 39.2  | 29 | A | HLDATTELDRSIA              | S | -0.4  | 4.3  |               |
| 31  | Cg1368    | 2 | 1473.7497 | -0.3 | 292   | 304  | 0  | 42.0  | 29 | T | LADEMGVLQERIT              | S | 0.0   | 3.82 |               |
| 31  | Cg1368    | 2 | 1561.7545 | -0.4 | 396   | 409  | 0  | 59.5  | 28 | I | AILGMDELSEEDKI             | T | -0.2  | 3.5  |               |
| 31  | Cg1368    | 2 | 1648.7865 | -0.4 | 398   | 412  | 0  | 45.2  | 28 | I | LGMDELSEEDKITVA            | R | -0.2  | 3.5  |               |
| 31  | Cg1368    | 2 | 2095.095  | -0.9 | 464   | 483  | 0  | 37.7  | 29 | A | FNGLGGLDDVEAAYKLTGK        | - | -0.4  | 6.96 |               |
| 31  | Cg1368    | 2 | 2157.1066 | -2.4 | 335   | 354  | 0  | 46.8  | 30 | A | HLDATTELDRSIAASKGIYPA      | V | -0.3  | 5.28 |               |
| 32  | Cg0957    | 1 | 532.2646  | 1.1  | 1801  | 1805 | 0  | 30.8  | 29 | T | GTWGL                      | P | 0.3   | 6.02 |               |
| 32  | Cg0957    | 1 | 599.3894  | 1.5  | 1569  | 1573 | 0  | 30.2  | 19 | L | LIELL                      | S | 2.5   | 3.3  |               |
| 33  | Cg2843    | 1 | 641.3384  | 0.2  | 23    | 28   | 0  | 40.7  | 29 | V | NLEVPA                     | R | 0.2   | 3.3  |               |
| 33  | Cg2843    | 1 | 829.3858  | 0.5  | 218   | 224  | 0  | 23.1  | 22 | A | FYSLEAT                    | G | 0.3   | 3.3  |               |
| 33  | Cg2843    | 1 | 1109.6444 | -2.1 | 160   | 169  | 0  | 34.5  | 24 | A | RAIAVEPEIL                 | L | 0.8   | 4.26 |               |
| 33  | Cg2843    | 1 | 1197.5455 | -3.5 | 10    | 19   | 0  | 36.1  | 25 | V | NIYYGDFHAV                 | Q | 0.0   | 4.94 |               |
| 33  | Cg2843    | 1 | 1331.5881 | -3.4 | 213   | 224  | 0  | 35.8  | 25 | V | SDQTAFYSLEAT               | G | -0.4  | 3    |               |

| hit | accession | z | mass      | ppm  | start | end | mc | score | id | - | sequence                           | + | gravy | pl   | modification |
|-----|-----------|---|-----------|------|-------|-----|----|-------|----|---|------------------------------------|---|-------|------|--------------|
| 33  | Cg2843    | 1 | 1353.769  | -4.1 | 160   | 171 | 0  | 47.9  | 26 | A | RAIAVEPEILLM                       | D | 1.1   | 4.26 |              |
| 33  | Cg2843    | 2 | 1626.7049 | -1.3 | 240   | 252 | 0  | 73.0  | 24 | I | FENPDQKETEDYI                      | S | -1.9  | 3.5  |              |
| 33  | Cg2843    | 2 | 1770.7584 | -1.7 | 240   | 254 | 0  | 86.7  | 22 | I | FENPDQKETEDYISG                    | R | -1.7  | 3.5  |              |
| 33  | Cg2843    | 2 | 1873.9673 | -0.1 | 64    | 80  | 0  | 43.1  | 29 | G | EILLDGENIYGSKIDPV                  | A | 0.0   | 3.58 |              |
| 33  | Cg2843    | 2 | 2059.0837 | -2.9 | 62    | 80  | 0  | 46.2  | 30 | V | KGEILLDGENIYGSKIDPV                | A | -0.3  | 4.06 |              |
| 33  | Cg2843    | 2 | 2130.9494 | -1.9 | 240   | 257 | 0  | 103.8 | 24 | I | FENPDQKETEDYISGRFG                 | - | -1.6  | 3.92 |              |
| 33  | Cg2843    | 2 | 2392.2526 | -1.3 | 59    | 80  | 0  | 47.4  | 30 | G | AYVKGEILLDGENIYGSKIDPV             | A | 0.0   | 4.06 |              |
| 34  | Cg0924    | 1 | 995.5651  | -2.9 | 258   | 267 | 0  | 26.1  | 24 | I | AAANPDLILV                         | M | 1.3   | 3.1  |              |
| 34  | Cg0924    | 2 | 1150.5289 | -0.7 | 266   | 276 | 0  | 63.5  | 28 | I | LVMDRDGGTST                        | R | -0.4  | 3.88 |              |
| 34  | Cg0924    | 2 | 1206.588  | 0.6  | 182   | 192 | 0  | 58.7  | 28 | I | VADFESALERA                        | K | 0.0   | 3.82 |              |
| 34  | Cg0924    | 1 | 1255.7176 | -1.8 | 83    | 94  | 0  | 36.7  | 28 | V | AAPLQLVPFTVT                       | G | 1.2   | 6.02 |              |
| 34  | Cg0924    | 1 | 1361.7231 | -1.8 | 225   | 237 | 0  | 39.2  | 28 | T | YGPFDLVGLTPA                       | L | 0.9   | 3.1  |              |
| 34  | Cg0924    | 1 | 1508.6518 | -2.7 | 166   | 179 | 0  | 43.0  | 24 | A | ETLGEIFGEEEDAA                     | K | -0.6  | 2.8  |              |
| 34  | Cg0924    | 2 | 1935.9789 | 0.5  | 146   | 162 | 0  | 36.9  | 29 | T | VVELDPRDGEPLDQELI                  | R | -0.5  | 3.38 |              |
| 34  | Cg0924    | 2 | 2517.1767 | -2.0 | 315   | 336 | 0  | 28.0  | 28 | Y | TNENIITYTEILNGMADMFEKA             | A | -0.2  | 3.68 |              |
| 34  | Cg0924    | 2 | 2896.3146 | -0.6 | 312   | 336 | 0  | 108.6 | 26 | A | DTYTENIITYTEILNGMADMFEKA           | A | -0.4  | 3.5  |              |
| 34  | Cg0924    | 2 | 3095.4103 | -1.3 | 312   | 338 | 0  | 66.6  | 25 | A | DTYTENIITYTEILNGMADMFEKAAQ         | - | -0.4  | 3.5  |              |
| 34  | Cg0924    | 3 | 3583.6801 | -1.3 | 148   | 179 | 0  | 62.8  | 28 | V | ELDPRDGEPLDQELIRQAETLGEIFGEEEDAA   | K | -1.0  | 3.42 |              |
| 34  | Cg0924    | 3 | 3781.817  | -2.1 | 146   | 179 | 0  | 53.5  | 30 | T | VVELDPRDGEPLDQELIRQAETLGEIFGEEEDAA | K | -0.7  | 3.42 |              |
| 35  | Cg1314    | 1 | 690.3952  | 1.0  | 323   | 328 | 0  | 39.6  | 26 | S | IFLDLA                             | R | 2.2   | 3.1  |              |
| 35  | Cg1314    | 1 | 715.3653  | 0.6  | 251   | 257 | 0  | 32.1  | 25 | G | NLGWGLG                            | Y | 0.3   | 6.02 |              |
| 35  | Cg1314    | 1 | 800.4796  | -0.2 | 466   | 473 | 0  | 34.3  | 30 | E | IIPGFALA                           | T | 2.2   | 6.02 |              |
| 35  | Cg1314    | 1 | 953.4454  | -0.8 | 316   | 323 | 0  | 26.2  | 25 | T | DTRAYESI                           | F | -1.0  | 4.08 |              |
| 35  | Cg1314    | 1 | 1079.4746 | -3.0 | 211   | 219 | 0  | 32.1  | 24 | A | NPMDIWSFA                          | N | 0.1   | 3.1  |              |
| 35  | Cg1314    | 2 | 1127.6802 | -0.4 | 362   | 371 | 0  | 34.1  | 24 | S | SLIEDLLKVV                         | K | 1.3   | 4.08 |              |
| 35  | Cg1314    | 1 | 1146.4903 | -2.7 | 30    | 38  | 0  | 25.0  | 23 | T | EKYDDYMLA                          | G | -1.1  | 3.7  |              |
| 35  | Cg1314    | 1 | 1214.7122 | -2.4 | 361   | 371 | 0  | 26.4  | 25 | A | SSLIEDLLKVV                        | K | 1.1   | 4.08 |              |
| 35  | Cg1314    | 1 | 1263.5958 | -2.5 | 209   | 219 | 0  | 32.6  | 28 | A | LANPMDIWSFA                        | N | 0.6   | 3.1  |              |
| 35  | Cg1314    | 1 | 1265.5412 | -1.0 | 503   | 514 | 0  | 31.0  | 24 | A | AAVESNEDVDFA                       | D | -0.1  | 2.84 |              |
| 35  | Cg1314    | 1 | 1328.701  | -0.2 | 399   | 411 | 0  | 33.5  | 28 | A | MAINPSDSILGLV                      | G | 1.1   | 3.1  |              |
| 35  | Cg1314    | 2 | 1657.6969 | -0.7 | 220   | 235 | 0  | 66.3  | 21 | A | NSNDYGPHTDGIGNPT                   | Y | -1.5  | 3.88 |              |
| 35  | Cg1314    | 2 | 1735.8152 | -0.3 | 484   | 498 | 0  | 32.0  | 28 | L | TKEPSEEILNEFETA                    | K | -1.1  | 3.68 |              |
| 35  | Cg1314    | 2 | 2049.0153 | -1.6 | 481   | 498 | 0  | 44.7  | 30 | V | SLLTKEPSEEILNEFETA                 | K | -0.5  | 3.68 |              |
| 36  | Cg2810    | 1 | 584.3897  | 1.5  | 36    | 41  | 0  | 31.7  | 31 | L | ILGLVA                             | R | 3.0   | 6.02 |              |
| 36  | Cg2810    | 1 | 640.4523  | 0.3  | 32    | 37  | 0  | 30.8  | 25 | L | ILGLIL                             | G | 3.3   | 6.02 |              |
| 36  | Cg2810    | 1 | 640.4523  | -0.9 | 31    | 36  | 0  | 28.6  | 25 | G | LILGLI                             | L | 3.3   | 6.02 |              |
| 36  | Cg2810    | 1 | 1246.6558 | -1.9 | 54    | 66  | 0  | 38.6  | 29 | A | SWLTGLLSGVGSA                      | Y | 0.9   | 6.02 |              |
| 36  | Cg2810    | 2 | 1317.63   | -1.4 | 452   | 463 | 0  | 34.3  | 29 | A | TVSEKETEPAEV                       | R | -1.0  | 3.8  |              |
| 36  | Cg2810    | 1 | 1547.7468 | -1.7 | 50    | 65  | 0  | 31.0  | 29 | A | DGEASWLTGLLSGVGS                   | A | 0.3   | 3    |              |
| 36  | Cg2810    | 1 | 1614.8002 | -3.1 | 427   | 440 | 0  | 52.5  | 29 | V | AKREGILDQDVWDA                     | A | -0.8  | 3.96 |              |

| hit | accession | z | mass      | ppm  | start | end | mc | score | id | - | sequence             | + | gravy | pl   | modification  |
|-----|-----------|---|-----------|------|-------|-----|----|-------|----|---|----------------------|---|-------|------|---------------|
| 36  | Cg2810    | 1 | 1618.7839 | -3.5 | 50    | 66  | 0  | 33.5  | 28 | A | DGEASWLTGLLSGVGSA    | Y | 0.4   | 3    |               |
| 36  | Cg2810    | 2 | 2015.0476 | -1.5 | 139   | 157 | 0  | 33.5  | 30 | A | ADPSRVGSWLGFQSVIPS   | N | 0.3   | 6.78 |               |
| 36  | Cg2810    | 2 | 2200.1277 | -4.0 | 137   | 157 | 0  | 33.8  | 30 | S | NAADPSRVGSWLGFQSVIPS | N | 0.2   | 6.78 |               |
| 37  | Cg0756    | 1 | 545.3213  | -0.2 | 580   | 584 | 0  | 29.7  | 26 | F | PLFGI                | A | 1.8   | 6.02 |               |
| 37  | Cg0756    | 1 | 601.3873  | 0.8  | 200   | 204 | 0  | 22.9  | 16 | S | IMIII                | I | 4.0   | 6.02 |               |
| 37  | Cg0756    | 1 | 635.3683  | 0.5  | 358   | 362 | 0  | 24.1  | 19 | F | PFLFI                | T | 2.5   | 6.02 |               |
| 37  | Cg0756    | 1 | 816.4382  | 0.0  | 618   | 624 | 0  | 34.4  | 32 | L | AWDLIVT              | M | 1.3   | 3.1  |               |
| 37  | Cg0756    | 2 | 900.5029  | 0.4  | 668   | 675 | 0  | 36.5  | 30 | A | IDAVIRNT             | M | 0.4   | 6.78 |               |
| 37  | Cg0756    | 1 | 1245.7122 | -1.8 | 573   | 584 | 0  | 31.3  | 26 | L | GGINLVFPLFGI         | A | 1.7   | 6.02 |               |
| 37  | Cg0756    | 1 | 1273.6489 | -3.1 | 329   | 339 | 0  | 43.2  | 28 | I | LFARPEVQMP           | V | -0.1  | 6.98 |               |
| 37  | Cg0756    | 1 | 1376.6183 | -2.8 | 743   | 754 | 0  | 46.1  | 26 | A | MWDERYPGGAPV         | S | -0.8  | 4.08 |               |
| 37  | Cg0756    | 1 | 1575.7106 | -2.2 | 633   | 646 | 0  | 54.1  | 25 | I | FHSDPAIGYWAQNA       | N | -0.4  | 4.94 |               |
| 37  | Cg0756    | 1 | 1598.6624 | -3.9 | 716   | 729 | 0  | 24.3  | 20 | T | TEEPDTESEFFAPT       | G | -1.2  | 2.84 |               |
| 37  | Cg0756    | 2 | 1771.8637 | 1.0  | 481   | 498 | 0  | 30.1  | 29 | A | FGMSEILSGFIGGAGMKA   | F | 0.8   | 6.94 |               |
| 37  | Cg0756    | 1 | 1986.8735 | -3.3 | 716   | 733 | 0  | 42.2  | 23 | T | TEEPDTESEFFAPTGFLA   | S | -0.5  | 2.84 |               |
| 38  | Cg3008    | 1 | 630.3489  | -0.3 | 32    | 37  | 0  | 30.3  | 22 | S | KWAGAV               | A | 0.4   | 10.1 |               |
| 38  | Cg3008    | 1 | 642.3952  | 1.2  | 39    | 44  | 0  | 43.8  | 27 | A | DLIGLL               | G | 2.0   | 3.1  |               |
| 38  | Cg3008    | 1 | 668.317   | 1.5  | 24    | 29  | 0  | 30.8  | 28 | V | FDLGA                | S | 1.2   | 3.1  |               |
| 38  | Cg3008    | 1 | 699.4167  | 1.1  | 39    | 45  | 0  | 41.6  | 30 | A | DLIGLLG              | - | 1.7   | 3.1  |               |
| 38  | Cg3008    | 1 | 701.386   | -0.7 | 32    | 38  | 0  | 28.0  | 26 | S | KWAGAVA              | D | 0.6   | 10.1 |               |
| 38  | Cg3008    | 1 | 770.4538  | 0.5  | 38    | 45  | 0  | 46.6  | 29 | V | ADLIGLLG             | - | 1.7   | 3.1  |               |
| 38  | Cg3008    | 1 | 802.3902  | 0.1  | 22    | 27  | 0  | 35.2  | 28 | G | YVFDL                | G | 1.5   | 3.1  |               |
| 38  | Cg3008    | 1 | 804.413   | -1.2 | 30    | 37  | 0  | 38.9  | 26 | A | SSKWAGAV             | A | 0.1   | 10.1 |               |
| 38  | Cg3008    | 1 | 859.4116  | 0.6  | 21    | 27  | 0  | 35.4  | 26 | I | GYVFDL               | G | 1.2   | 3.1  |               |
| 38  | Cg3008    | 1 | 869.5222  | -0.3 | 37    | 45  | 0  | 51.9  | 27 | A | VADLIGLLG            | - | 2.0   | 3.1  |               |
| 38  | Cg3008    | 2 | 875.4501  | 1.0  | 30    | 38  | 0  | 44.8  | 28 | A | SSKWAGAVA            | D | 0.3   | 10.1 |               |
| 38  | Cg3008    | 1 | 930.4487  | -0.8 | 22    | 29  | 0  | 44.9  | 28 | G | YVFDLGA              | S | 1.3   | 3.1  |               |
| 38  | Cg3008    | 1 | 987.4702  | -1.8 | 21    | 29  | 0  | 41.5  | 27 | I | GYVFDLGA             | S | 1.1   | 3.1  |               |
| 38  | Cg3008    | 2 | 1229.6332 | 1.2  | 17    | 27  | 0  | 55.4  | 30 | G | SGLIGYVFDL           | G | 1.4   | 3.1  |               |
| 38  | Cg3008    | 2 | 1270.6598 | -1.3 | 18    | 29  | 0  | 45.0  | 28 | S | GLIGYVFDLGA          | S | 1.5   | 3.1  |               |
| 38  | Cg3008    | 1 | 1357.6918 | -2.6 | 17    | 29  | 0  | 29.2  | 29 | G | SGLIGYVFDLGA         | S | 1.3   | 3.1  |               |
| 39  | Cg0834    | 1 | 716.3493  | 1.3  | 176   | 181 | 0  | 40.9  | 28 | A | NWADLV               | E | 0.3   | 3.1  |               |
| 39  | Cg0834    | 1 | 859.4803  | -0.7 | 293   | 299 | 0  | 33.3  | 31 | G | KFEVQPL              | V | -0.2  | 6.94 |               |
| 39  | Cg0834    | 1 | 880.4331  | 0.2  | 384   | 391 | 0  | 47.0  | 29 | V | SPFYPAIS             | K | 0.4   | 5.92 |               |
| 39  | Cg0834    | 1 | 918.4811  | 0.0  | 151   | 158 | 0  | 37.0  | 30 | T | LYALPQNT             | N | -0.2  | 5.92 |               |
| 39  | Cg0834    | 2 | 965.5294  | 1.2  | 375   | 383 | 0  | 27.1  | 25 | S | LENAAPRPV            | S | -0.3  | 6.98 |               |
| 39  | Cg0834    | 1 | 987.5389  | -0.4 | 291   | 299 | 0  | 44.6  | 30 | T | AGKFEVQPL            | V | 0.0   | 6.94 |               |
| 39  | Cg0834    | 2 | 1063.5298 | -1.0 | 392   | 401 | 0  | 31.2  | 29 | S | KAIQDNAYAA           | L | -0.4  | 6.68 |               |
| 39  | Cg0834    | 1 | 1163.5492 | -0.8 | 412   | 422 | 0  | 43.3  | 29 | A | TTDMKAAIENA          | S | -0.4  | 4.08 |               |
| 39  | Cg0834    | 2 | 1179.5441 | -1.9 | 412   | 422 | 0  | 35.7  | 27 | A | TTDMKAAIENA          | S | -0.4  | 4.08 | Oxidation (M) |



| hit | accession | z | mass      | ppm  | start | end  | mc | score | id | - | sequence                         | + | gravy | pl    | modification |
|-----|-----------|---|-----------|------|-------|------|----|-------|----|---|----------------------------------|---|-------|-------|--------------|
| 39  | Cg0834    | 2 | 1422.783  | 0.5  | 371   | 383  | 0  | 79.6  | 26 | A | LKESLENAAPRPV                    | S | -0.6  | 7.1   |              |
| 39  | Cg0834    | 2 | 1850.8758 | -0.3 | 308   | 325  | 0  | 97.0  | 28 | V | STLGGYNNGINVNSENKA               | T | -0.9  | 6.86  |              |
| 39  | Cg0834    | 2 | 1856.8792 | -1.5 | 119   | 135  | 0  | 40.0  | 28 | A | ANQWLAPLEGDLEVDT                 | G | -0.4  | 2.84  |              |
| 39  | Cg0834    | 2 | 1938.9323 | -1.2 | 326   | 341  | 0  | 52.4  | 29 | A | TARDFIEFIINEENQT                 | W | -0.6  | 3.68  |              |
| 39  | Cg0834    | 2 | 2000.9255 | -0.6 | 354   | 370  | 0  | 47.2  | 27 | A | SIYDDESLEVEQYPYLP                | L | -0.5  | 2.84  |              |
| 40  | Cg2743    | 1 | 641.3748  | 1.2  | 1891  | 1897 | 0  | 37.5  | 29 | R | GVAVSLP                          | S | 1.6   | 6.02  |              |
| 40  | Cg2743    | 1 | 656.3745  | -1.2 | 1529  | 1534 | 0  | 27.1  | 27 | H | LDSLIP                           | A | 1.0   | 3.1   |              |
| 40  | Cg2743    | 1 | 854.4143  | 3.6  | 2518  | 2524 | 0  | 31.5  | 28 | R | MAMTRFV                          | G | 1.1   | 11.04 |              |
| 40  | Cg2743    | 1 | 861.4596  | 4.1  | 1765  | 1773 | 0  | 32.8  | 30 | L | GVEFGLGAI                        | D | 1.4   | 3.3   |              |
| 41  | Cg1082    | 1 | 582.3741  | 0.7  | 252   | 257  | 0  | 28.1  | 27 | I | PLGILA                           | A | 2.0   | 6.02  |              |
| 41  | Cg1082    | 1 | 640.416   | 1.6  | 129   | 134  | 0  | 29.5  | 23 | F | TVVIIP                           | L | 2.5   | 6.02  |              |
| 41  | Cg1082    | 1 | 640.4523  | 0.3  | 155   | 160  | 0  | 30.8  | 25 | V | LIGLLL                           | C | 3.2   | 6.02  |              |
| 41  | Cg1082    | 1 | 1108.7294 | -1.3 | 130   | 139  | 0  | 23.1  | 14 | T | VVIPLLMVL                        | G | 3.3   | 6.02  |              |
| 41  | Cg1082    | 1 | 1315.721  | -2.1 | 244   | 255  | 0  | 32.8  | 28 | A | GIFQDMLIPLGI                     | L | 1.4   | 3.1   |              |
| 41  | Cg1082    | 1 | 1424.8391 | -2.7 | 51    | 65   | 0  | 41.8  | 24 | V | GIPLLLFLIGNGGAA                  | E | 1.6   | 6.02  |              |
| 41  | Cg1082    | 1 | 1427.8792 | 0.8  | 46    | 58   | 0  | 27.4  | 21 | A | TVFPVGIPLLLFL                    | I | 2.3   | 6.02  |              |
| 41  | Cg1082    | 2 | 1640.9137 | -0.9 | 51    | 67   | 0  | 30.2  | 26 | V | GIPLLLFLIGNGGAAES                | A | 1.2   | 3.3   |              |
| 41  | Cg1082    | 1 | 1831.9906 | -2.3 | 241   | 257  | 0  | 35.5  | 29 | A | NFAGIFQDMLIPLGILA                | A | 1.4   | 3.1   |              |
| 41  | Cg1082    | 1 | 1848.9873 | -4.9 | 207   | 223  | 0  | 29.6  | 29 | A | DILAYTPFAAISDLVQI                | G | 1.1   | 2.92  |              |
| 41  | Cg1082    | 1 | 1903.0277 | -0.7 | 241   | 258  | 0  | 51.3  | 28 | A | NFAGIFQDMLIPLGILAA               | W | 1.4   | 3.1   |              |
| 41  | Cg1082    | 1 | 1968.1448 | -0.4 | 46    | 65   | 0  | 53.8  | 24 | A | TVFPVGIPLLLFLIGNGGAA             | E | 1.6   | 6.02  |              |
| 42  | Cg2845    | 1 | 526.3115  | 0.8  | 114   | 118  | 0  | 32.0  | 30 | I | PNLLA                            | A | 0.9   | 6.02  |              |
| 42  | Cg2845    | 1 | 755.4615  | -1.7 | 223   | 229  | 0  | 20.6  | 19 | V | MILPVIA                          | A | 2.7   | 6.02  |              |
| 42  | Cg2845    | 1 | 815.3524  | 0.4  | 107   | 113  | 0  | 24.9  | 24 | I | DAMYFGI                          | P | 0.8   | 3.1   |              |
| 42  | Cg2845    | 1 | 925.567   | -3.3 | 222   | 230  | 0  | 25.3  | 25 | A | VMILPVIAA                        | T | 2.8   | 6.02  |              |
| 42  | Cg2845    | 1 | 1116.5961 | -1.6 | 275   | 285  | 0  | 36.6  | 29 | A | MLGLGRALGET                      | M | 0.5   | 6.98  |              |
| 42  | Cg2845    | 1 | 1318.6737 | -4.3 | 275   | 287  | 0  | 31.3  | 29 | A | MLGLGRALGETMA                    | L | 0.7   | 6.98  |              |
| 42  | Cg2845    | 1 | 1394.6904 | -2.6 | 107   | 119  | 0  | 36.2  | 28 | I | DAMYFGIPNLLAA                    | T | 0.9   | 3.1   |              |
| 42  | Cg2845    | 1 | 1464.7357 | 1.5  | 155   | 168  | 0  | 32.2  | 28 | L | GYMVDMLAAVPSIV                   | Y | 1.5   | 3.1   |              |
| 42  | Cg2845    | 2 | 1647.8064 | -1.9 | 2     | 16   | 0  | 44.5  | 30 | M | ATNESVSEKQRRLDAT                 | R | -1.2  | 4.44  |              |
| 43  | Cg2195    | 2 | 835.4804  | 0.5  | 108   | 115  | 0  | 39.6  | 23 | L | VYTGVIKG                         | - | 0.8   | 9.72  |              |
| 43  | Cg2195    | 1 | 1014.6114 | -0.1 | 94    | 103  | 0  | 38.0  | 27 | A | SLLGVIVFPA                       | Y | 2.2   | 6.02  |              |
| 43  | Cg2195    | 1 | 1130.4516 | -1.4 | 50    | 59   | 0  | 29.5  | 19 | V | GEDWDADQP                        | T | -1.4  | 2.78  |              |
| 43  | Cg2195    | 1 | 1229.5201 | -1.1 | 49    | 59   | 0  | 35.0  | 22 | A | VGEDWDADQP                       | T | -0.9  | 2.78  |              |
| 43  | Cg2195    | 1 | 1300.5572 | 0.5  | 48    | 59   | 0  | 31.6  | 22 | A | AVGEDWDADQP                      | T | -0.7  | 2.78  |              |
| 43  | Cg2195    | 2 | 2158.9039 | -1.7 | 60    | 78   | 0  | 65.4  | 19 | V | TGEDIFGEEHERDNENTPA              | W | -1.8  | 3.74  |              |
| 43  | Cg2195    | 3 | 3271.345  | -1.0 | 50    | 78   | 0  | 90.7  | 15 | V | GEDWDADQPVTGEDIFGEEHERDNENTPA    | W | -1.7  | 3.42  |              |
| 43  | Cg2195    | 3 | 3370.4134 | -1.2 | 49    | 78   | 0  | 73.8  | 17 | A | VGEDWDADQPVTGEDIFGEEHERDNENTPA   | W | -1.5  | 3.42  |              |
| 43  | Cg2195    | 3 | 3441.4505 | -1.6 | 48    | 78   | 0  | 101.2 | 17 | A | AVGEDWDADQPVTGEDIFGEEHERDNENTPA  | W | -1.4  | 3.42  |              |
| 43  | Cg2195    | 3 | 3512.4876 | -1.3 | 47    | 78   | 0  | 73.7  | 17 | A | AAVGEDWDADQPVTGEDIFGEEHERDNENTPA | W | -1.3  | 3.42  |              |

| hit | accession | z | mass      | ppm  | start | end | mc | score | id | - | sequence            | + | gravy | pl   | modification |
|-----|-----------|---|-----------|------|-------|-----|----|-------|----|---|---------------------|---|-------|------|--------------|
| 44  | Cg1556    | 1 | 526.3115  | 0.8  | 92    | 96  | 0  | 32.0  | 30 | I | PNILA               | R | 1.0   | 6.02 |              |
| 44  | Cg1556    | 1 | 761.4072  | 0.7  | 260   | 266 | 0  | 54.8  | 28 | A | NFALQVA             | E | 1.1   | 6.02 |              |
| 44  | Cg1556    | 1 | 853.5273  | -0.6 | 89    | 96  | 0  | 29.1  | 24 | I | LTIPNILA            | R | 1.6   | 6.02 |              |
| 44  | Cg1556    | 1 | 895.3712  | 0.2  | 100   | 106 | 0  | 44.0  | 25 | A | FWETQDA             | D | -1.1  | 3    |              |
| 44  | Cg1556    | 1 | 903.543   | 1.2  | 121   | 129 | 0  | 32.7  | 25 | I | ALLGGLFIT           | S | 2.1   | 6.02 |              |
| 44  | Cg1556    | 1 | 938.4822  | -1.3 | 27    | 35  | 0  | 46.3  | 26 | S | AHVEGTQVV           | L | 0.3   | 5.12 |              |
| 44  | Cg1556    | 1 | 966.6113  | 0.6  | 88    | 96  | 0  | 24.6  | 22 | A | ILTIPNILA           | R | 1.9   | 6.02 |              |
| 44  | Cg1556    | 1 | 1109.5241 | -1.5 | 12    | 22  | 0  | 36.5  | 28 | A | SVYVADGAETV         | L | 0.5   | 3    |              |
| 44  | Cg1556    | 1 | 1120.54   | -1.6 | 260   | 269 | 0  | 37.3  | 29 | A | NFALQVAEET          | S | 0.0   | 3.12 |              |
| 44  | Cg1556    | 1 | 1251.7802 | -1.7 | 85    | 96  | 0  | 21.7  | 20 | A | TLAILTIPNILA        | R | 1.8   | 6.02 |              |
| 44  | Cg1556    | 2 | 1683.7264 | 0.3  | 223   | 237 | 0  | 24.2  | 23 | A | TSYLEENSGDWLEAA     | Q | -0.7  | 2.88 |              |
| 44  | Cg1556    | 1 | 1776.7479 | -1.9 | 172   | 186 | 0  | 42.4  | 21 | A | SDWFNDTSDKVTEYA     | Y | -1.2  | 3.5  |              |
| 44  | Cg1556    | 2 | 2014.9272 | -0.3 | 187   | 203 | 0  | 50.8  | 27 | A | YTAQDFVGENKDDWIKS   | A | -1.2  | 3.96 |              |
| 45  | Cg1228    | 1 | 853.4294  | -1.4 | 225   | 233 | 0  | 28.3  | 26 | V | GQLPGAQPS           | T | -0.7  | 6.02 |              |
| 45  | Cg1228    | 1 | 1029.4767 | -0.4 | 425   | 433 | 0  | 28.5  | 26 | V | SVTHDPDFI           | A | -0.2  | 3.88 |              |
| 45  | Cg1228    | 2 | 1048.5553 | 1.1  | 125   | 134 | 0  | 38.6  | 28 | V | GLDLPLSHPT          | K | 0.0   | 4.94 |              |
| 45  | Cg1228    | 2 | 1080.5928 | -0.6 | 223   | 233 | 0  | 26.4  | 26 | I | KVGQLPGAQPS         | T | -0.5  | 10.1 |              |
| 45  | Cg1228    | 2 | 1187.6146 | -1.3 | 261   | 273 | 0  | 67.9  | 30 | A | STVITGPNAGKGS       | T | -0.2  | 10.1 |              |
| 45  | Cg1228    | 2 | 1288.6623 | -1.7 | 261   | 274 | 0  | 31.3  | 29 | A | STVITGPNAGKST       | L | -0.2  | 10.1 |              |
| 45  | Cg1228    | 2 | 1560.8181 | 0.1  | 411   | 424 | 0  | 47.8  | 30 | V | TMLRELTDNIGISV      | S | 0.4   | 4.08 |              |
| 45  | Cg1228    | 2 | 2276.1464 | -1.4 | 391   | 410 | 0  | 39.1  | 30 | K | LLILDEPTFGQDPETFTEL | T | 0.1   | 2.8  |              |
| 46  | Cg1345    | 1 | 675.3956  | 0.7  | 183   | 189 | 0  | 39.7  | 28 | M | GFGLLGI             | G | 2.0   | 6.02 |              |
| 46  | Cg1345    | 1 | 689.4112  | 1.5  | 268   | 273 | 0  | 34.7  | 27 | A | QFGLII              | N | 2.0   | 6.02 |              |
| 46  | Cg1345    | 1 | 977.5182  | -0.5 | 131   | 141 | 0  | 31.6  | 28 | A | ALTGIGGGVFS         | G | 1.3   | 6.02 |              |
| 46  | Cg1345    | 1 | 998.6165  | -3.3 | 300   | 309 | 0  | 25.4  | 25 | A | FLGPLIGALV          | R | 2.2   | 6.02 |              |
| 46  | Cg1345    | 1 | 1150.6097 | -1.8 | 85    | 94  | 0  | 39.2  | 28 | I | YMFLPPILGT          | R | 1.1   | 5.92 |              |
| 46  | Cg1345    | 1 | 1216.722  | -1.4 | 298   | 309 | 0  | 24.9  | 24 | T | FAFLGPLIGALV        | R | 2.2   | 6.02 |              |
| 47  | Cg0587    | 1 | 698.3275  | 1.0  | 47    | 52  | 0  | 34.3  | 26 | A | FAFDSI              | D | 1.3   | 3.1  |              |
| 47  | Cg0587    | 1 | 930.5208  | 0.9  | 187   | 194 | 0  | 40.0  | 29 | W | GKQILELM            | Q | 0.3   | 6.94 |              |
| 47  | Cg0587    | 1 | 1050.4505 | -0.5 | 38    | 46  | 0  | 27.1  | 25 | A | DTYPELNEA           | F | -1.3  | 2.94 |              |
| 47  | Cg0587    | 1 | 1142.6812 | -2.2 | 126   | 135 | 0  | 32.0  | 25 | A | RQVGVPYILV          | A | 1.0   | 9.84 |              |
| 47  | Cg0587    | 1 | 1234.5717 | -1.1 | 36    | 46  | 0  | 31.1  | 28 | V | LADTYPELNEA         | F | -0.6  | 2.94 |              |
| 47  | Cg0587    | 2 | 1237.5251 | -1.1 | 300   | 310 | 0  | 37.2  | 23 | G | AYTPHTEFECS         | V | -1.0  | 4.24 |              |
| 47  | Cg0587    | 1 | 1391.6092 | -1.2 | 160   | 171 | 0  | 37.1  | 25 | L | LAEQDYDEEAPI        | V | -1.0  | 2.8  |              |
| 47  | Cg0587    | 2 | 1461.7351 | 0.8  | 34    | 46  | 0  | 42.0  | 29 | T | KVLADTYPELNEA       | F | -0.5  | 3.82 |              |
| 48  | Cg2184    | 1 | 773.4171  | 1.3  | 287   | 293 | 0  | 43.8  | 30 | G | IESAELL             | S | 0.9   | 3.12 |              |
| 48  | Cg2184    | 1 | 867.5065  | 0.7  | 474   | 481 | 0  | 26.4  | 25 | A | LALNPEVI            | V | 1.2   | 3.3  |              |
| 48  | Cg2184    | 1 | 1044.5638 | -2.6 | 438   | 446 | 0  | 32.2  | 30 | A | RVAELDMV            | S | 0.9   | 4.08 |              |
| 48  | Cg2184    | 1 | 1146.5153 | -3.1 | 280   | 290 | 0  | 29.2  | 25 | I | QSAEQGIESA          | E | -1.0  | 3.12 |              |
| 48  | Cg2184    | 2 | 1190.6143 | -1.7 | 350   | 362 | 0  | 71.4  | 27 | A | LVGESGSGKSTVA       | N | 0.2   | 6.94 |              |

| hit | accession | z | mass      | ppm  | start | end | mc | score | id | - | sequence                   | + | gravy | pl    | modification |
|-----|-----------|---|-----------|------|-------|-----|----|-------|----|---|----------------------------|---|-------|-------|--------------|
| 48  | Cg2184    | 2 | 1261.6514 | -0.4 | 349   | 362 | 0  | 53.6  | 30 | T | ALVGESGSGKSTVA             | N | 0.3   | 6.94  |              |
| 48  | Cg2184    | 1 | 1267.5543 | -1.0 | 402   | 412 | 0  | 33.6  | 25 | V | FQNPYGSGLDPM               | Y | -0.7  | 3.1   |              |
| 48  | Cg2184    | 2 | 1949.0193 | -0.6 | 106   | 122 | 0  | 48.6  | 29 | I | GLVPQDPMTNLNPVWRI          | G | -0.2  | 6.78  |              |
| 49  | Cg3395    | 1 | 582.3741  | 0.7  | 219   | 224 | 0  | 28.1  | 27 | I | PLGIIA                     | V | 2.1   | 6.02  |              |
| 49  | Cg3395    | 1 | 670.3149  | 1.5  | 75    | 80  | 0  | 39.8  | 23 | V | MFGFAV                     | S | 2.2   | 6.02  |              |
| 49  | Cg3395    | 1 | 796.5058  | 0.5  | 117   | 124 | 0  | 35.7  | 23 | T | ALIGLLPT                   | A | 1.9   | 6.02  |              |
| 49  | Cg3395    | 1 | 844.5058  | -1.4 | 320   | 327 | 0  | 26.5  | 26 | M | SLLLPFVG                   | M | 2.0   | 6.02  |              |
| 49  | Cg3395    | 2 | 1123.6601 | 2.1  | 88    | 99  | 0  | 35.6  | 24 | L | GGLVLGPLGDKV               | G | 0.8   | 6.76  |              |
| 49  | Cg3395    | 2 | 1258.6193 | -0.1 | 296   | 306 | 0  | 52.7  | 28 | V | YLEEQIGLHSA                | S | -0.2  | 4.24  |              |
| 49  | Cg3395    | 2 | 1726.7621 | -0.4 | 488   | 502 | 0  | 93.3  | 25 | S | HMPFPDEENVGAEKQ            | N | -1.4  | 4.16  |              |
| 49  | Cg3395    | 2 | 2039.9548 | -1.8 | 230   | 247 | 0  | 37.7  | 28 | T | RIPETPAFENNQDEPNAV         | V | -1.3  | 3.68  |              |
| 50  | Cg1995    | 2 | 668.3969  | 1.0  | 388   | 393 | 0  | 44.1  | 24 | M | RLPNIG                     | Q | -0.3  | 11.04 |              |
| 50  | Cg1995    | 1 | 755.3701  | 0.1  | 727   | 733 | 0  | 26.7  | 22 | T | VEPDPVT                    | G | -0.4  | 3     |              |
| 51  | Cg0780    | 1 | 1019.4899 | -1.0 | 132   | 140 | 0  | 32.2  | 28 | A | LWSGLGWMA                  | N | 0.9   | 6.02  |              |
| 51  | Cg0780    | 1 | 1087.6277 | -0.6 | 248   | 258 | 0  | 38.2  | 27 | A | ALLGAIGFEVV                | K | 2.1   | 3.3   |              |
| 51  | Cg0780    | 1 | 1205.6656 | -2.7 | 189   | 199 | 0  | 55.0  | 26 | A | SGLTKNLLDFV                | G | 0.5   | 6.76  |              |
| 51  | Cg0780    | 2 | 1742.0342 | -0.5 | 249   | 265 | 0  | 44.4  | 22 | A | LLGAIGFEVVKQVGSLL          | A | 1.4   | 6.94  |              |
| 51  | Cg0780    | 2 | 1813.0713 | -0.2 | 248   | 265 | 0  | 36.2  | 23 | A | ALLGAIGFEVVKQVGSLL         | A | 1.4   | 6.94  |              |
| 51  | Cg0780    | 2 | 2029.1096 | 0.0  | 189   | 208 | 0  | 38.2  | 28 | A | SGLTKNLLDFVGLGEIPGIS       | Y | 0.6   | 4.08  |              |
| 52  | Cg2262    | 1 | 656.3381  | -1.2 | 175   | 180 | 0  | 29.0  | 27 | A | IVEEPA                     | V | 0.3   | 3.12  |              |
| 52  | Cg2262    | 2 | 891.416   | 0.7  | 371   | 378 | 0  | 37.7  | 27 | A | MPYEGKPA                   | V | -1.1  | 6.86  |              |
| 52  | Cg2262    | 1 | 1038.5233 | -0.8 | 206   | 215 | 0  | 26.1  | 26 | V | VEEPAVAEVP                 | E | 0.3   | 3.02  |              |
| 52  | Cg2262    | 1 | 1238.603  | -1.5 | 199   | 210 | 0  | 36.0  | 28 | A | VAEPAVVEEPA                | V | 0.1   | 2.96  |              |
| 52  | Cg2262    | 1 | 1252.6187 | -1.0 | 175   | 186 | 0  | 37.1  | 29 | A | IVEEPAVAEPA                | V | 0.1   | 2.96  |              |
| 52  | Cg2262    | 1 | 1591.7617 | -3.0 | 249   | 263 | 0  | 33.8  | 28 | A | ALEETPVPDVEPEPA            | A | -0.6  | 2.84  |              |
| 52  | Cg2262    | 2 | 1728.8934 | 0.6  | 551   | 567 | 0  | 35.0  | 30 | V | KLVGLGEGADDLAPFEV          | E | 0.3   | 3.58  |              |
| 52  | Cg2262    | 1 | 1848.8992 | -4.1 | 171   | 188 | 0  | 50.0  | 30 | A | EPEAIVEEPAVAEPEPA          | E | 0.0   | 2.86  |              |
| 52  | Cg2262    | 2 | 2021.9681 | -0.8 | 150   | 168 | 0  | 47.1  | 29 | V | VAVEPEVETEPEAVVEEPA        | V | -0.2  | 2.82  |              |
| 52  | Cg2262    | 2 | 2630.348  | -1.2 | 551   | 576 | 0  | 39.0  | 31 | V | KLVGLGEGADDLAPFEVEGFDVALLG | - | 0.5   | 3.38  |              |
| 52  | Cg2262    | 3 | 2709.2756 | -1.2 | 126   | 149 | 0  | 52.5  | 29 | A | TPEPETSDDVVEEPEVKEPEVKEV   | V | -1.3  | 3.56  |              |
| 53  | Cg3368    | 1 | 621.356   | 0.8  | 87    | 91  | 0  | 22.5  | 19 | M | MVLLF                      | S | 3.3   | 6.02  |              |
| 53  | Cg3368    | 1 | 656.3745  | -1.2 | 313   | 318 | 0  | 27.1  | 27 | L | IDSLLP                     | S | 1.0   | 3.1   |              |
| 53  | Cg3368    | 1 | 672.4058  | 1.5  | 312   | 317 | 0  | 31.8  | 24 | P | LIDSLL                     | P | 1.9   | 3.1   |              |
| 53  | Cg3368    | 1 | 709.4738  | 1.4  | 357   | 363 | 0  | 42.6  | 21 | S | IADVLPV                    | I | 3.0   | 6.02  |              |
| 53  | Cg3368    | 1 | 1032.612  | -2.5 | 459   | 467 | 0  | 25.0  | 22 | I | HLAWLPIIA                  | A | 1.6   | 7.84  |              |
| 53  | Cg3368    | 1 | 1060.6169 | -1.2 | 472   | 481 | 0  | 32.5  | 25 | V | TLLGPLFSLT                 | E | 1.4   | 6.02  |              |
| 53  | Cg3368    | 1 | 1345.7857 | -2.7 | 469   | 481 | 0  | 24.7  | 23 | A | SVVTLLGPLFSLT              | E | 1.6   | 6.02  |              |
| 53  | Cg3368    | 1 | 1416.8228 | -0.8 | 468   | 481 | 0  | 34.2  | 24 | A | ASVVTLLGPLFSLT             | E | 1.7   | 6.02  |              |
| 53  | Cg3368    | 2 | 2732.352  | -1.0 | 472   | 495 | 0  | 82.3  | 30 | V | TLLGPLFSLTEQQMEFSPLTHSWA   | N | 0.1   | 4.24  |              |
| 53  | Cg3368    | 2 | 2831.4415 | -1.1 | 468   | 493 | 0  | 62.9  | 31 | A | ASVVTLLGPLFSLTEQQMEFSPLTHS | W | 0.4   | 4.24  |              |

| hit | accession | z | mass      | ppm  | start | end | mc | score | id | - | sequence                          | + | gravy | pl   | modification |
|-----|-----------|---|-----------|------|-------|-----|----|-------|----|---|-----------------------------------|---|-------|------|--------------|
| 54  | Cg2912    | 1 | 794.3923  | -0.6 | 175   | 181 | 0  | 53.0  | 27 | V | THDVNPL                           | M | -0.6  | 4.94 |              |
| 54  | Cg2912    | 2 | 926.5185  | -1.0 | 29    | 38  | 0  | 26.4  | 26 | A | VLGPNGVGKS                        | T | 0.1   | 10.1 |              |
| 54  | Cg2912    | 2 | 962.5437  | 0.0  | 158   | 166 | 0  | 31.4  | 27 | T | VSLFGELKA                         | E | 0.9   | 6.94 |              |
| 54  | Cg2912    | 2 | 1097.5869 | 2.1  | 189   | 198 | 0  | 30.6  | 26 | I | LYLAPNGHTI                        | G | 0.3   | 7.76 |              |
| 54  | Cg2912    | 2 | 1403.766  | 0.9  | 158   | 171 | 0  | 57.9  | 27 | T | VSLFGELKAEGVGV                    | V | 0.9   | 4.26 |              |
| 54  | Cg2912    | 1 | 1463.8347 | -1.4 | 136   | 148 | 0  | 40.0  | 23 | T | RPQLLLEDEPLLS                     | L | 0.1   | 4.08 |              |
| 54  | Cg2912    | 2 | 1578.8188 | -2.9 | 175   | 188 | 0  | 47.9  | 29 | V | THDVNPLMGLVDRI                    | L | 0.1   | 5.1  |              |
| 54  | Cg2912    | 2 | 1700.9713 | 0.5  | 158   | 174 | 0  | 47.3  | 25 | T | VSLFGELKAEGVGVVVV                 | T | 1.4   | 4.26 |              |
| 54  | Cg2912    | 2 | 1971.9724 | 0.6  | 189   | 207 | 0  | 38.1  | 30 | I | LYLAPNGHTIGTVGDVMQS               | E | 0.2   | 4.94 |              |
| 54  | Cg2912    | 2 | 3415.7334 | -3.0 | 189   | 220 | 0  | 41.9  | 31 | I | LYLAPNGHTIGTVGDVMQSEKLSSELYNAPVTV | A | 0.1   | 4.42 |              |
| 55  | Cg1791    | 1 | 1013.4454 | -1.1 | 98    | 107 | 0  | 25.4  | 24 | S | TGFFTDANAA                        | K | 0.2   | 3.1  |              |
| 55  | Cg1791    | 2 | 1390.694  | -0.6 | 32    | 44  | 0  | 48.8  | 29 | V | AVNDLTDNKTLLST                    | L | -0.6  | 3.88 |              |
| 55  | Cg1791    | 2 | 1450.7126 | 0.8  | 165   | 177 | 0  | 53.8  | 29 | V | LNDKFGIENGLMT                     | T | -0.2  | 4.08 |              |
| 55  | Cg1791    | 2 | 1551.7603 | -1.0 | 165   | 178 | 0  | 58.5  | 29 | V | LNDKFGIENGLMTT                    | V | -0.2  | 4.08 |              |
| 55  | Cg1791    | 2 | 1566.7526 | 0.1  | 60    | 73  | 0  | 67.9  | 29 | V | EYDDDSITVGGKRI                    | A | -0.9  | 3.96 |              |
| 55  | Cg1791    | 2 | 1650.8287 | 0.1  | 165   | 179 | 0  | 47.6  | 29 | V | LNDKFGIENGLMTTV                   | H | 0.1   | 4.08 |              |
| 55  | Cg1791    | 3 | 2907.5012 | -1.7 | 34    | 59  | 0  | 55.3  | 31 | V | NLDLTDNKTLLKFDKFSIMGRLGQEV        | E | -0.3  | 4.46 |              |
| 55  | Cg1791    | 3 | 3077.6067 | 0.2  | 32    | 59  | 0  | 58.1  | 31 | V | AVNDLTDNKTLLKFDKFSIMGRLGQEV       | E | -0.1  | 4.46 |              |
| 56  | Cg2844    | 1 | 640.416   | 2.0  | 102   | 107 | 0  | 26.8  | 23 | S | VISIPI                            | G | 2.6   | 6.02 |              |
| 56  | Cg2844    | 1 | 695.4581  | -0.7 | 43    | 49  | 0  | 27.3  | 24 | M | LIAAVPL                           | V | 2.6   | 6.02 |              |
| 56  | Cg2844    | 1 | 815.4753  | -2.1 | 214   | 222 | 0  | 29.2  | 29 | T | ALSGIVTGV                         | M | 1.8   | 6.02 |              |
| 56  | Cg2844    | 1 | 1086.4883 | -1.2 | 247   | 256 | 0  | 42.7  | 25 | I | NWNPFGGPQA                        | S | -1.1  | 6.02 |              |
| 56  | Cg2844    | 1 | 1130.6369 | -1.8 | 214   | 225 | 0  | 43.3  | 28 | T | ALSGIVTGVMLA                      | V | 2.0   | 6.02 |              |
| 56  | Cg2844    | 1 | 1871.9062 | -2.6 | 247   | 263 | 0  | 53.5  | 28 | I | NWNPFGGPQASLPLMML                 | D | 0.1   | 6.02 |              |
| 56  | Cg2844    | 2 | 2480.1691 | -0.6 | 247   | 268 | 0  | 68.3  | 28 | I | NWNPFGGPQASLPLMMLDMYKA            | G | -0.1  | 6.68 |              |
| 56  | Cg2844    | 2 | 2877.3652 | -4.0 | 247   | 273 | 0  | 58.8  | 28 | I | NWNPFGGPQASLPLMMLDMYKAGTAPA       | T | -0.1  | 6.68 |              |
| 57  | Cg2984    | 1 | 621.356   | 0.8  | 125   | 129 | 0  | 22.5  | 19 | P | MVIIF                             | G | 3.6   | 6.02 |              |
| 57  | Cg2984    | 1 | 1275.8206 | -4.2 | 16    | 26  | 0  | 15.1  | 14 | V | ILIVLFLVSLF                       | S | 3.4   | 6.02 |              |
| 57  | Cg2984    | 2 | 1491.7821 | 1.1  | 555   | 567 | 0  | 52.5  | 28 | A | TIDTEVQFLLDKA                     | H | 0.1   | 3.7  |              |
| 57  | Cg2984    | 2 | 1562.8192 | -0.4 | 554   | 567 | 0  | 36.8  | 29 | A | ATIDTEVQFLLDKA                    | H | 0.2   | 3.7  |              |
| 58  | Cg1169    | 1 | 1059.4873 | -2.2 | 507   | 517 | 0  | 29.0  | 26 | T | LVDGPPGSDFG                       | V | -0.1  | 2.92 |              |
| 58  | Cg1169    | 1 | 1104.6219 | -0.8 | 68    | 77  | 0  | 33.3  | 26 | A | GIPLFLDFA                         | I | 1.8   | 3.1  |              |
| 58  | Cg1169    | 1 | 1175.659  | -1.5 | 67    | 77  | 0  | 27.0  | 27 | T | AGIPLFLDFA                        | I | 1.8   | 3.1  |              |
| 58  | Cg1169    | 1 | 1304.535  | -0.9 | 134   | 144 | 0  | 33.2  | 20 | A | WGADPDYFFS                        | D | -0.5  | 2.92 |              |
| 58  | Cg1169    | 2 | 1445.7741 | -0.5 | 494   | 506 | 0  | 33.0  | 28 | A | AFLPMVSWPKGT                      | L | 0.6   | 10.1 |              |
| 58  | Cg1169    | 1 | 1679.7144 | -3.6 | 134   | 147 | 0  | 25.8  | 21 | A | WGADPDYFFSDFL                     | N | -0.2  | 2.82 |              |
| 58  | Cg1169    | 3 | 2030.0473 | -0.2 | 507   | 525 | 0  | 52.0  | 29 | T | LVDGPPGSDFGVLPFEKRT               | L | -0.3  | 4.3  |              |
| 58  | Cg1169    | 2 | 2249.0237 | -0.2 | 534   | 554 | 0  | 64.0  | 26 | A | SNDPISPFDANEDASRFPTVA             | I | -0.7  | 3.5  |              |
| 59  | Cg1001    | 1 | 771.3915  | -1.8 | 52    | 58  | 0  | 27.7  | 27 | V | EGLGFHI                           | R | 0.5   | 5.12 |              |
| 59  | Cg1001    | 1 | 773.4171  | 1.3  | 115   | 121 | 0  | 30.0  | 30 | A | SIEAELL                           | T | 0.9   | 3.12 |              |

| hit | accession | z | mass      | ppm  | start | end | mc | score | id | - | sequence                        | + | gravy | pl    | modification |
|-----|-----------|---|-----------|------|-------|-----|----|-------|----|---|---------------------------------|---|-------|-------|--------------|
| 59  | Cg1001    | 1 | 866.4538  | 0.6  | 66    | 73  | 0  | 29.1  | 26 | T | FVDFGAVI                        | T | 2.1   | 3.1   |              |
| 59  | Cg1001    | 1 | 945.3927  | -1.0 | 106   | 114 | 0  | 24.4  | 21 | K | GVEEDETPA                       | S | -1.2  | 2.88  |              |
| 59  | Cg1001    | 1 | 1068.5492 | 0.5  | 65    | 74  | 0  | 33.2  | 28 | A | TFVDFGAVIT                      | A | 1.5   | 3.1   |              |
| 59  | Cg1001    | 1 | 1273.6918 | -2.2 | 33    | 44  | 0  | 37.8  | 28 | T | AFSESIINPLIA                    | S | 1.1   | 3.3   |              |
| 59  | Cg1001    | 3 | 2324.2699 | -1.9 | 117   | 135 | 0  | 33.0  | 28 | I | EAELLTEIRDLLQEQRKRLQ            | - | -0.9  | 4.36  |              |
| 59  | Cg1001    | 3 | 2524.386  | 1.1  | 115   | 135 | 0  | 92.4  | 28 | A | SIEAELLTEIRDLLQEQRKRLQ          | - | -0.6  | 4.36  |              |
| 60  | Cg2032    | 1 | 553.3839  | 1.3  | 353   | 357 | 0  | 24.5  | 24 | W | LIVIP                           | V | 3.1   | 6.02  |              |
| 61  | Cg2361    | 2 | 1015.5047 | -0.5 | 121   | 129 | 0  | 31.3  | 28 | K | SAQDQLQRA                       | Q | -1.3  | 6.78  |              |
| 61  | Cg2361    | 2 | 1056.4658 | -0.4 | 177   | 186 | 0  | 38.4  | 23 | A | ANVDTHMQAA                      | K | -0.3  | 4.94  |              |
| 61  | Cg2361    | 2 | 1113.4873 | -0.9 | 175   | 185 | 0  | 32.2  | 24 | T | GAANVDTHMQA                     | A | -0.3  | 4.94  |              |
| 61  | Cg2361    | 2 | 1184.5244 | -0.5 | 175   | 186 | 0  | 25.9  | 24 | T | GAANVDTHMQAA                    | K | -0.1  | 4.94  |              |
| 61  | Cg2361    | 2 | 1229.6    | 0.2  | 248   | 258 | 0  | 38.5  | 28 | A | QNRADTLVNEA                     | D | -1.0  | 4.08  |              |
| 61  | Cg2361    | 2 | 1229.6252 | -1.5 | 312   | 322 | 0  | 58.3  | 29 | A | AVKEQQNALET                     | R | -1.0  | 4.26  |              |
| 61  | Cg2361    | 2 | 1300.6623 | -1.6 | 311   | 322 | 0  | 37.2  | 29 | M | AAVKEQQNALET                    | R | -0.7  | 4.26  |              |
| 61  | Cg2361    | 2 | 1527.7892 | -0.3 | 341   | 354 | 0  | 70.4  | 29 | S | LLEGQLEELNARGS                  | S | -0.5  | 3.96  |              |
| 61  | Cg2361    | 2 | 1571.7652 | -1.3 | 116   | 129 | 0  | 42.6  | 29 | A | QNDAKSAQDQLQRA                  | Q | -1.8  | 6.9   |              |
| 61  | Cg2361    | 2 | 1603.7875 | -1.2 | 189   | 203 | 0  | 30.3  | 29 | V | LGLAQEMADRLTSEA                 | R | -0.1  | 3.82  |              |
| 61  | Cg2361    | 2 | 1831.8621 | -2.0 | 210   | 225 | 0  | 39.3  | 28 | S | MLDEAREAAEKQIEEA                | N | -1.0  | 3.88  |              |
| 62  | Cg2703    | 1 | 545.3247  | 2.0  | 274   | 278 | 0  | 29.9  | 28 | A | MLVLA                           | I | 3.1   | 6.02  |              |
| 62  | Cg2703    | 1 | 620.2992  | 0.0  | 144   | 148 | 0  | 28.8  | 27 | I | PFQMV                           | M | 0.8   | 6.02  |              |
| 62  | Cg2703    | 1 | 850.5892  | -0.1 | 277   | 284 | 0  | 30.4  | 16 | V | LAIPIVI                         | F | 3.3   | 6.02  |              |
| 62  | Cg2703    | 1 | 1193.7821 | 0.0  | 274   | 284 | 0  | 15.1  | 13 | A | MLVLAIIPIVI                     | F | 3.3   | 6.02  |              |
| 62  | Cg2703    | 2 | 1402.7344 | 1.0  | 185   | 197 | 0  | 41.2  | 29 | A | GFVKSIPLDVEEA                   | A | 0.3   | 3.82  |              |
| 62  | Cg2703    | 2 | 1595.8096 | 0.6  | 285   | 297 | 0  | 31.4  | 29 | I | FYFSTQRHIIIEGV                  | A | 0.1   | 7.76  |              |
| 63  | Cg2704    | 2 | 994.5851  | 0.9  | 4     | 11  | 0  | 24.7  | 23 | A | TLKKYFPV                        | F | -0.1  | 10.18 |              |
| 63  | Cg2704    | 1 | 1059.4655 | -1.0 | 224   | 234 | 0  | 38.7  | 24 | T | NGAPGGQTEMV                     | A | -0.6  | 3.3   |              |
| 63  | Cg2704    | 1 | 1092.5604 | -1.8 | 46    | 54  | 0  | 45.2  | 29 | A | KWVGIDNYV                       | K | -0.1  | 6.68  |              |
| 63  | Cg2704    | 1 | 1295.651  | -3.2 | 211   | 221 | 0  | 52.4  | 28 | S | NSFKLFDQNLA                     | L | -0.3  | 6.76  |              |
| 63  | Cg2704    | 2 | 1319.7312 | -0.1 | 106   | 117 | 0  | 36.8  | 25 | V | FFMPNLIGGIVL                    | G | 1.9   | 6.02  |              |
| 63  | Cg2704    | 2 | 1648.7991 | 1.3  | 240   | 254 | 0  | 44.4  | 29 | I | NTLFRNMNVEGVGQA                 | K | -0.3  | 6.98  |              |
| 63  | Cg2704    | 1 | 1917.0142 | -3.2 | 235   | 251 | 0  | 33.7  | 29 | V | ALNIINTLFRNMNVEGV               | G | 0.5   | 6.98  |              |
| 63  | Cg2704    | 3 | 2958.4691 | -1.0 | 224   | 251 | 0  | 47.3  | 31 | T | NGAPGGQTEMVALNIINTLFRNMNVEGV    | G | 0.1   | 4.26  |              |
| 63  | Cg2704    | 2 | 3214.5863 | -2.3 | 224   | 254 | 0  | 49.2  | 31 | T | NGAPGGQTEMVALNIINTLFRNMNVEGVGQA | K | 0.0   | 4.26  |              |
| 64  | Cg0359    | 1 | 545.3247  | 2.0  | 134   | 138 | 0  | 29.9  | 28 | F | MLVIA                           | A | 3.2   | 6.02  |              |
| 64  | Cg0359    | 1 | 621.356   | 0.8  | 133   | 137 | 0  | 26.1  | 19 | L | FMLVI                           | A | 3.4   | 6.02  |              |
| 64  | Cg0359    | 1 | 814.3974  | -1.4 | 190   | 197 | 0  | 32.5  | 25 | A | SFHSPGAI                        | T | 0.3   | 7.84  |              |
| 64  | Cg0359    | 1 | 981.5607  | -0.3 | 163   | 171 | 0  | 38.4  | 25 | V | NQLKNLVPG                       | Q | -0.5  | 10.1  |              |
| 64  | Cg0359    | 2 | 1013.5506 | -1.3 | 153   | 162 | 0  | 40.5  | 28 | M | GAPKNTIQSV                      | N | -0.4  | 10.1  |              |
| 64  | Cg0359    | 1 | 1065.4462 | -1.3 | 43    | 53  | 0  | 33.9  | 23 | L | SDVDTSVSGEA                     | S | -0.3  | 2.88  |              |
| 64  | Cg0359    | 1 | 1133.608  | -2.0 | 68    | 77  | 0  | 37.6  | 28 | S | SLFRAEVELA                      | K | 0.6   | 4.26  |              |

| hit | accession | z | mass      | ppm  | start | end | mc | score | id | - | sequence                            | + | gravy | pl | modification |
|-----|-----------|---|-----------|------|-------|-----|----|-------|----|---|-------------------------------------|---|-------|----|--------------|
| 64  | Cg0359    | 2 | 1224.5524 | 0.1  | 190   | 201 | 0  | 39.6  | 26 | A | SFHSPGAITGDH                        | - | -0.5  |    | 6            |
| 64  | Cg0359    | 1 | 1559.7831 | -0.7 | 28    | 42  | 0  | 39.0  | 29 | T | DGNSTFAPKVDSIPL                     | S | -0.2  |    | 3.88         |
| 64  | Cg0359    | 2 | 1689.8461 | -0.8 | 33    | 48  | 0  | 43.3  | 29 | T | FAPKVDSIPLSDVDTS                    | V | 0.0   |    | 3.6          |
| 64  | Cg0359    | 2 | 2133.0478 | -0.1 | 33    | 53  | 0  | 57.1  | 30 | T | FAPKVDSIPLSDVDTSVSGEA               | S | 0.1   |    | 3.5          |
| 64  | Cg0359    | 3 | 3469.6373 | -1.3 | 20    | 53  | 0  | 62.4  | 29 | V | SNKDGLFTDGNSTFAPKVDSIPLSDVDTSVSGEA  | S | -0.4  |    | 3.64         |
| 65  | Cg0647    | 1 | 632.3897  | -1.3 | 74    | 79  | 0  | 29.3  | 27 | S | IFAIGI                              | M | 3.0   |    | 6.02         |
| 65  | Cg0647    | 1 | 821.4357  | -1.7 | 278   | 284 | 0  | 32.6  | 23 | S | SLIYMPV                             | L | 1.5   |    | 5.92         |
| 65  | Cg0647    | 1 | 1488.8626 | -0.7 | 278   | 290 | 0  | 27.5  | 23 | S | SLIYMPVLITQIV                       | N | 1.8   |    | 5.92         |
| 65  | Cg0647    | 1 | 1575.8946 | -0.7 | 277   | 290 | 0  | 58.1  | 25 | A | SSLIYMPVLITQIV                      | N | 1.6   |    | 5.92         |
| 66  | Cg3187    | 1 | 509.3213  | 0.4  | 272   | 276 | 0  | 21.3  | 21 | A | LPLPA                               | A | 1.2   |    | 6.02         |
| 66  | Cg3187    | 1 | 580.3584  | 1.0  | 272   | 277 | 0  | 27.6  | 18 | A | LPLPAA                              | Y | 1.3   |    | 6.02         |
| 66  | Cg3187    | 1 | 798.4388  | 0.0  | 237   | 242 | 0  | 22.3  | 22 | S | WLVRPE                              | L | -0.4  |    | 6.98         |
| 67  | Cg2137    | 1 | 866.4022  | 0.9  | 288   | 295 | 0  | 33.0  | 28 | G | DLSFLDAS                            | - | 0.5   |    | 2.92         |
| 67  | Cg2137    | 1 | 1641.8879 | -3.3 | 128   | 142 | 0  | 55.6  | 28 | V | NFGGPYLLTHQALLV                     | R | 0.6   |    | 7.76         |
| 67  | Cg2137    | 2 | 1715.8512 | -0.2 | 99    | 113 | 0  | 90.9  | 30 | S | AQRETLIQNGEVDMI                     | A | -0.4  |    | 3.82         |
| 67  | Cg2137    | 2 | 2325.1489 | -1.2 | 261   | 281 | 0  | 37.1  | 30 | M | YADGTFQRLLTENLGEDSVVV               | E | -0.1  |    | 3.58         |
| 67  | Cg2137    | 2 | 2661.2704 | -3.2 | 49    | 73  | 0  | 53.2  | 29 | G | TKYDQPGLGLRNPDNSMSGLDVDVA           | E | -0.7  |    | 3.88         |
| 67  | Cg2137    | 3 | 3601.7319 | -1.2 | 39    | 73  | 0  | 63.0  | 30 | A | AIENGSVNVGTYDQPGGLGLRNPDNSMSGLDVDVA | E | -0.4  |    | 3.76         |
| 68  | Cg0753    | 1 | 693.381   | -1.2 | 180   | 186 | 0  | 29.6  | 27 | A | HLGLSPA                             | E | 0.5   |    | 7.84         |
| 68  | Cg0753    | 1 | 818.3923  | -1.0 | 99    | 105 | 0  | 38.7  | 26 | L | TWANQVT                             | A | -0.5  |    | 6.02         |
| 68  | Cg0753    | 1 | 834.3971  | -0.5 | 190   | 197 | 0  | 45.6  | 26 | V | SVTEALDT                            | S | 0.1   |    | 3            |
| 68  | Cg0753    | 1 | 1200.6602 | -0.2 | 87    | 98  | 0  | 31.9  | 28 | A | ALLGEGLDISTL                        | T | 1.0   |    | 3            |
| 68  | Cg0753    | 1 | 1233.603  | 0.8  | 113   | 122 | 0  | 35.5  | 29 | S | LFNEHAYELV                          | S | 0.1   |    | 4.24         |
| 68  | Cg0753    | 2 | 1453.6725 | -1.3 | 167   | 179 | 0  | 39.3  | 27 | V | TFDPDGQITFKDA                       | H | -0.7  |    | 3.6          |
| 68  | Cg0753    | 2 | 1454.6678 | 1.8  | 75    | 86  | 0  | 62.3  | 27 | L | GFLDYLDDEEQR                        | A | -1.0  |    | 3.58         |
| 68  | Cg0753    | 2 | 1562.7616 | 0.4  | 110   | 122 | 0  | 45.9  | 29 | V | LESLENEHAYELV                       | S | 0.1   |    | 3.96         |
| 68  | Cg0753    | 2 | 1638.7889 | 1.0  | 73    | 86  | 0  | 96.2  | 28 | T | ALGFLDYLDDEEQR                      | A | -0.4  |    | 3.58         |
| 69  | Cg0129    | 1 | 770.4538  | 0.5  | 149   | 156 | 0  | 29.4  | 29 | N | LLGEAVLG                            | R | 1.6   |    | 3.3          |
| 70  | Cg2211    | 2 | 1131.5884 | 1.0  | 117   | 126 | 0  | 45.2  | 29 | G | NLTDSQLRSV                          | N | -0.6  |    | 6.78         |
| 70  | Cg2211    | 1 | 1222.5142 | -2.5 | 100   | 109 | 0  | 29.0  | 22 | H | VEPDWYDQA                           | T | -1.3  |    | 2.88         |
| 70  | Cg2211    | 2 | 1416.5946 | -0.1 | 98    | 109 | 0  | 48.4  | 22 | V | GHVEPDWYDQA                         | T | -1.3  |    | 3.7          |
| 70  | Cg2211    | 2 | 1475.7369 | -0.5 | 114   | 126 | 0  | 67.1  | 29 | G | TWGNLTDSQLRSV                       | N | -0.6  |    | 6.78         |
| 70  | Cg2211    | 2 | 1532.7583 | -1.3 | 113   | 126 | 0  | 69.6  | 29 | T | GTWGNLTDSQLRSV                      | N | -0.6  |    | 6.78         |
| 70  | Cg2211    | 2 | 1614.8002 | -0.9 | 2     | 16  | 0  | 68.3  | 29 | M | AGSSHTIEPEIYRGV                     | S | -0.4  |    | 5.3          |
| 70  | Cg2211    | 2 | 1633.806  | -0.1 | 112   | 126 | 0  | 41.1  | 30 | L | TGTWGNLTDSQLRSV                     | N | -0.6  |    | 6.78         |
| 70  | Cg2211    | 2 | 1847.9378 | 0.6  | 110   | 126 | 0  | 104.6 | 29 | A | TLTGTWGNLTDSQLRSV                   | N | -0.3  |    | 6.78         |
| 70  | Cg2211    | 2 | 2486.1925 | -1.8 | 2     | 25  | 0  | 59.8  | 29 | M | AGSSHTIEPEIYRGVSTLDEPSAA            | W | -0.4  |    | 4.16         |
| 71  | Cg0944    | 1 | 642.3588  | -0.8 | 268   | 273 | 0  | 33.6  | 27 | I | PDLSIV                              | G | 1.1   |    | 3.1          |
| 71  | Cg0944    | 1 | 674.4367  | 1.5  | 219   | 224 | 0  | 25.0  | 24 | G | LFIGIL                              | G | 3.2   |    | 6.02         |
| 71  | Cg0944    | 1 | 901.364   | 3.2  | 301   | 308 | 0  | 27.3  | 21 | A | NFFDAMGT                            | M | 0.2   |    | 3.1          |

| hit | accession | z | mass      | ppm  | start | end | mc | score | id | - | sequence                  | + | gravy | pl   | modification    |
|-----|-----------|---|-----------|------|-------|-----|----|-------|----|---|---------------------------|---|-------|------|-----------------|
| 71  | Cg0944    | 2 | 915.35    | 0.8  | 404   | 411 | 0  | 25.1  | 18 | G | AMMMGQVT                  | E | 0.9   | 6.02 | 3 Oxidation (M) |
| 71  | Cg0944    | 1 | 1681.8927 | -1.4 | 257   | 273 | 0  | 41.8  | 28 | A | VPGLPDSFGGIPDLSIV         | G | 0.8   | 2.92 |                 |
| 72  | Cg3024    | 1 | 621.356   | 0.8  | 674   | 678 | 0  | 26.1  | 19 | V | FMLVL                     | R | 3.3   | 6.02 |                 |
| 72  | Cg3024    | 1 | 680.4836  | 0.6  | 273   | 278 | 0  | 36.2  | 15 | Y | LIIPL                     | G | 3.3   | 6.02 |                 |
| 72  | Cg3024    | 1 | 789.4306  | -3.4 | 667   | 673 | 0  | 29.2  | 26 | V | ETIVMVV                   | F | 2.1   | 3.3  |                 |
| 72  | Cg3024    | 1 | 850.5892  | -0.1 | 589   | 596 | 0  | 22.2  | 16 | T | IVPLIALI                  | T | 3.2   | 6.02 |                 |
| 73  | Cg0545    | 1 | 583.4309  | -0.2 | 5     | 9   | 0  | 24.1  | 18 | L | IILLI                     | V | 4.2   | 6.02 |                 |
| 73  | Cg0545    | 1 | 678.3775  | -1.5 | 206   | 211 | 0  | 27.0  | 23 | T | MGVIFL                    | S | 2.8   | 6.02 |                 |
| 73  | Cg0545    | 1 | 712.4734  | -0.6 | 3     | 8   | 0  | 39.9  | 22 | T | ELIILL                    | I | 2.8   | 3.3  |                 |
| 73  | Cg0545    | 1 | 1041.5607 | -1.7 | 115   | 125 | 0  | 50.6  | 27 | S | SHALFGGLIGA               | A | 1.2   | 7.84 |                 |
| 73  | Cg0545    | 2 | 1302.6051 | -2.3 | 415   | 425 | 0  | 78.3  | 26 | V | QDLNNENEVTK               | - | -1.9  | 3.82 |                 |
| 73  | Cg0545    | 1 | 1334.6718 | -3.7 | 68    | 79  | 0  | 59.1  | 29 | A | KGVDLDQFDLS               | N | 0.0   | 3.6  |                 |
| 74  | Cg0668    | 1 | 621.356   | 0.8  | 85    | 89  | 0  | 22.5  | 19 | P | MVLIF                     | P | 3.4   | 6.02 |                 |
| 74  | Cg0668    | 1 | 686.4214  | 0.6  | 379   | 384 | 0  | 39.8  | 26 | G | ELLSLL                    | G | 1.8   | 3.3  |                 |
| 75  | Cg0968    | 1 | 557.3425  | 2.0  | 173   | 177 | 0  | 28.2  | 28 | V | DVVII                     | D | 2.8   | 3.1  |                 |
| 75  | Cg0968    | 2 | 782.465   | 0.0  | 356   | 363 | 0  | 25.1  | 25 | A | GKAPQVIA                  | R | 0.4   | 10.1 |                 |
| 76  | Cg0326    | 1 | 751.5207  | 0.9  | 605   | 611 | 0  | 20.0  | 17 | D | LIPLAI                    | A | 3.0   | 6.02 |                 |
| 76  | Cg0326    | 1 | 1207.7904 | 1.7  | 412   | 424 | 0  | 20.5  | 18 | V | VLLLVGAAIGAVL             | T | 2.8   | 6.02 |                 |
| 76  | Cg0326    | 1 | 1222.7359 | -1.5 | 459   | 470 | 0  | 27.3  | 24 | A | ALPGLMSLPLVL              | V | 1.9   | 6.02 |                 |
| 76  | Cg0326    | 1 | 1434.8884 | -1.8 | 459   | 472 | 0  | 29.2  | 19 | A | ALPGLMSLPLVLVL            | S | 2.2   | 6.02 |                 |
| 77  | Cg0577    | 1 | 872.4677  | 3.9  | 743   | 750 | 0  | 30.2  | 29 | A | MSDVLVLP                  | N | 1.5   | 3.1  |                 |
| 77  | Cg0577    | 1 | 933.5284  | 4.4  | 850   | 857 | 0  | 29.4  | 27 | S | FREGTLVL                  | E | 0.7   | 6.98 |                 |
| 77  | Cg0577    | 1 | 961.5596  | 3.7  | 113   | 120 | 0  | 29.9  | 25 | S | RLGYLLDL                  | A | 0.7   | 6.7  |                 |
| 78  | Cg1362    | 1 | 509.3213  | -0.2 | 220   | 224 | 0  | 30.4  | 21 | N | IPPAL                     | H | 1.4   | 6.02 |                 |
| 78  | Cg1362    | 1 | 539.3683  | -0.2 | 227   | 231 | 0  | 26.5  | 23 | V | LVVPI                     | E | 3.0   | 6.02 |                 |
| 78  | Cg1362    | 1 | 855.4014  | -1.4 | 129   | 135 | 0  | 32.4  | 25 | A | EYALDFV                   | R | 0.6   | 3    |                 |
| 78  | Cg1362    | 1 | 957.4266  | -2.0 | 79    | 86  | 0  | 38.1  | 24 | V | NMLFTDFA                  | N | 0.7   | 3.1  |                 |
| 78  | Cg1362    | 1 | 1153.7223 | -1.1 | 221   | 231 | 0  | 34.9  | 21 | I | PPALHVLVPI                | E | 1.7   | 7.84 |                 |
| 78  | Cg1362    | 2 | 1315.6085 | 1.2  | 125   | 135 | 0  | 34.2  | 27 | V | QNFAEYALDFV               | R | 0.2   | 3    |                 |
| 78  | Cg1362    | 1 | 1354.7285 | -2.4 | 232   | 242 | 0  | 37.8  | 28 | I | EFFSTFILRPV               | T | 0.9   | 6.98 |                 |
| 78  | Cg1362    | 1 | 1471.6983 | -1.0 | 123   | 135 | 0  | 43.7  | 27 | H | GVQNFAEYALDFV             | R | 0.4   | 3    |                 |
| 78  | Cg1362    | 1 | 1477.9021 | -2.6 | 218   | 231 | 0  | 32.4  | 18 | I | PNIPPALHVLVPI             | E | 1.3   | 7.84 |                 |
| 78  | Cg1362    | 1 | 1647.7569 | -2.2 | 56    | 69  | 0  | 43.4  | 27 | G | EFHAPDLDKEFFPG            | H | -0.8  | 4.06 |                 |
| 78  | Cg1362    | 2 | 1876.155  | 0.1  | 214   | 231 | 0  | 35.6  | 18 | S | SVVIPNIPPALHVLVPI         | E | 1.7   | 7.84 |                 |
| 78  | Cg1362    | 2 | 2571.1918 | -3.2 | 56    | 78  | 0  | 45.5  | 27 | G | EFHAPDLDKEFFPGHVTDSEVV    | N | -0.4  | 4.06 |                 |
| 78  | Cg1362    | 3 | 2887.3487 | -3.0 | 53    | 78  | 0  | 51.7  | 27 | S | MKGEFHAPDLDKEFFPGHVTDSEVV | N | -0.5  | 4.36 |                 |
| 79  | Cg2405    | 2 | 1349.6472 | -3.5 | 223   | 234 | 0  | 31.2  | 29 | A | MLTGPQNMPKFS              | D | -0.5  | 10.1 |                 |
| 79  | Cg2405    | 1 | 1653.7304 | -3.1 | 161   | 174 | 0  | 55.2  | 24 | A | MEELRGENYDQGIT            | S | -1.3  | 3.68 |                 |
| 79  | Cg2405    | 2 | 1860.9945 | -1.6 | 235   | 250 | 0  | 85.6  | 29 | S | DRQLSADEKKDIAFI           | K | -0.4  | 4.46 |                 |
| 79  | Cg2405    | 1 | 1936.9166 | -2.1 | 206   | 222 | 0  | 55.8  | 28 | G | KYAPNLDAANEQEIQQA         | M | -1.0  | 3.82 |                 |

| hit | accession | z | mass      | ppm  | start | end | mc | score | id | - | sequence                         | + | gravy | pl   | modification  |
|-----|-----------|---|-----------|------|-------|-----|----|-------|----|---|----------------------------------|---|-------|------|---------------|
| 79  | Cg2405    | 1 | 1993.9381 | -2.7 | 205   | 222 | 0  | 72.0  | 28 | S | GKYAPNLDAANEQEIQYA               | M | -1.0  | 3.82 |               |
| 79  | Cg2405    | 2 | 2080.9701 | -2.3 | 204   | 222 | 0  | 50.8  | 28 | S | SGKYAPNLDAANEQEIQYA              | M | -1.0  | 3.82 |               |
| 79  | Cg2405    | 2 | 2095.0949 | -2.1 | 233   | 250 | 0  | 35.1  | 30 | K | FSDRQLSADEKDKDIIAFI              | K | -0.3  | 4.46 |               |
| 79  | Cg2405    | 2 | 2517.0965 | -0.6 | 153   | 174 | 0  | 61.4  | 23 | V | YNEDGTLAMEELRGENYDGQIT           | S | -1.2  | 3.44 |               |
| 80  | Cg0455    | 1 | 545.3247  | 2.0  | 378   | 382 | 0  | 29.9  | 28 | L | IMVLA                            | L | 3.2   | 6.02 |               |
| 80  | Cg0455    | 1 | 582.3741  | 0.7  | 210   | 215 | 0  | 28.1  | 27 | V | PIGIIA                           | L | 2.2   | 6.02 |               |
| 81  | Cg1624    | 1 | 695.4006  | 0.3  | 61    | 66  | 0  | 23.5  | 14 | I | PPLLWA                           | L | 0.9   | 6.02 |               |
| 81  | Cg1624    | 1 | 700.3829  | -0.6 | 53    | 58  | 0  | 21.4  | 19 | A | DLMLPI                           | F | 1.5   | 3.1  |               |
| 81  | Cg1624    | 1 | 1331.7125 | -1.4 | 37    | 49  | 0  | 40.0  | 29 | A | AGGALLPFLPEFT                    | I | 1.0   | 3.3  |               |
| 81  | Cg1624    | 1 | 1637.9255 | -1.0 | 53    | 66  | 0  | 38.1  | 25 | A | DLMLPIFIPPLLWA                   | L | 1.5   | 3.1  |               |
| 81  | Cg1624    | 1 | 1653.9204 | -2.2 | 53    | 66  | 0  | 37.2  | 28 | A | DLMLPIFIPPLLWA                   | L | 1.5   | 3.1  | Oxidation (M) |
| 81  | Cg1624    | 1 | 1678.86   | -2.1 | 499   | 512 | 0  | 46.9  | 29 | A | YVDEVLTNIDRMLV                   | A | 0.4   | 3.7  |               |
| 82  | Cg0133    | 1 | 678.3775  | -4.1 | 341   | 346 | 0  | 35.0  | 23 | D | MIGFLV                           | L | 2.8   | 6.02 |               |
| 82  | Cg0133    | 1 | 911.548   | 1.2  | 127   | 135 | 0  | 25.6  | 21 | A | FVVVPPLAA                        | M | 2.2   | 6.02 |               |
| 83  | Cg1281    | 1 | 711.4894  | -1.3 | 94    | 100 | 0  | 30.7  | 25 | I | ALIVLLA                          | L | 3.4   | 6.02 |               |
| 83  | Cg1281    | 1 | 767.5157  | 0.9  | 843   | 849 | 0  | 20.2  | 19 | V | PIIIVLT                          | L | 2.7   | 6.02 |               |
| 84  | Cg0456    | 1 | 640.4523  | 0.3  | 263   | 268 | 0  | 30.8  | 25 | I | IIGLII                           | T | 3.6   | 6.02 |               |
| 84  | Cg0456    | 1 | 640.4523  | -0.9 | 262   | 267 | 0  | 28.6  | 25 | P | IIIGLI                           | I | 3.6   | 6.02 |               |
| 84  | Cg0456    | 1 | 850.5892  | -0.1 | 261   | 268 | 0  | 18.8  | 16 | D | PIIIGLII                         | T | 3.0   | 6.02 |               |
| 84  | Cg0456    | 1 | 1147.7944 | -1.3 | 521   | 531 | 0  | 13.6  | 13 | M | PLIGIALLLLL                      | F | 2.9   | 6.02 |               |
| 85  | Cg0445    | 1 | 664.3584  | 2.1  | 195   | 199 | 0  | 25.1  | 24 | I | WYIIA                            | N | 1.7   | 5.92 |               |
| 85  | Cg0445    | 2 | 803.345   | -0.6 | 173   | 179 | 0  | 30.6  | 26 | T | SFEHGEV                          | Y | -0.6  | 4.24 |               |
| 85  | Cg0445    | 1 | 944.5331  | -0.4 | 243   | 251 | 0  | 30.6  | 30 | I | GNITIPFAI                        | A | 1.3   | 6.02 |               |
| 85  | Cg0445    | 1 | 1037.4454 | -1.0 | 173   | 181 | 0  | 34.4  | 24 | T | SFEHGEVYA                        | N | -0.4  | 4.24 |               |
| 85  | Cg0445    | 2 | 1072.4825 | 0.1  | 170   | 179 | 0  | 26.9  | 26 | A | APTSFEHGEV                       | Y | -0.5  | 4.24 |               |
| 85  | Cg0445    | 1 | 1170.7012 | -2.2 | 241   | 251 | 0  | 28.6  | 24 | V | LIGNITIPFAI                      | A | 1.8   | 6.02 |               |
| 85  | Cg0445    | 1 | 1239.6135 | -1.3 | 75    | 84  | 0  | 46.9  | 28 | V | DVYGEFLREI                       | G | -0.1  | 3.82 |               |
| 85  | Cg0445    | 1 | 1382.8537 | -1.2 | 239   | 251 | 0  | 27.0  | 22 | A | LVLIGNITIPFAI                    | A | 2.2   | 6.02 |               |
| 85  | Cg0445    | 1 | 1452.6344 | -4.6 | 173   | 185 | 0  | 59.4  | 24 | T | SFEHGEVYANMVA                    | S | 0.0   | 4.24 |               |
| 85  | Cg0445    | 2 | 1466.7405 | 0.3  | 73    | 84  | 0  | 46.9  | 29 | A | QVDVYGEFLREI                     | G | -0.1  | 3.82 |               |
| 86  | Cg1604    | 1 | 1893.9068 | -3.0 | 145   | 163 | 0  | 34.2  | 28 | A | QLSETQLDPGTHAGEALGA              | A | -0.5  | 3.82 |               |
| 86  | Cg1604    | 2 | 2475.3221 | -1.2 | 66    | 88  | 0  | 89.0  | 29 | A | DSIIDHIVEDVVAGTLTDRPVLV          | M | 0.6   | 3.76 |               |
| 86  | Cg1604    | 2 | 2789.4447 | -0.5 | 63    | 88  | 0  | 96.9  | 31 | A | DQADSIIHDHIVEDVVAGTLTDRPVLV      | M | 0.4   | 3.62 |               |
| 86  | Cg1604    | 2 | 2988.5404 | -2.0 | 61    | 88  | 0  | 75.3  | 31 | V | QADQADSIIDHIVEDVVAGTLTDRPVLV     | M | 0.3   | 3.62 |               |
| 86  | Cg1604    | 2 | 3272.6889 | -2.9 | 58    | 88  | 0  | 105.7 | 31 | V | NAVQADQADSIIHDHIVEDVVAGTLTDRPVLV | M | 0.3   | 3.62 |               |
| 87  | Cg0284    | 1 | 617.4152  | -0.5 | 603   | 607 | 0  | 25.8  | 21 | I | FLLIL                            | V | 3.7   | 6.02 |               |
| 87  | Cg0284    | 1 | 730.4993  | 0.0  | 602   | 607 | 0  | 22.2  | 16 | A | IFLLIL                           | V | 3.9   | 6.02 |               |
| 87  | Cg0284    | 2 | 936.4917  | 1.6  | 572   | 580 | 0  | 33.5  | 27 | G | TTGFTAVQL                        | D | 0.7   | 6.02 |               |
| 88  | Cg1429    | 1 | 802.4953  | 0.6  | 245   | 252 | 0  | 32.1  | 24 | E | LAAGVLL                          | L | 2.7   | 6.02 |               |
| 88  | Cg1429    | 1 | 878.4134  | -2.4 | 106   | 113 | 0  | 28.1  | 27 | T | SYVQAQPS                         | Q | -0.7  | 5.92 |               |



| hit | accession | z | mass      | ppm  | start | end  | mc | score | id | - | sequence                     | + | gravy | pl    | modification  |
|-----|-----------|---|-----------|------|-------|------|----|-------|----|---|------------------------------|---|-------|-------|---------------|
| 88  | Cg1429    | 2 | 1362.7004 | -1.8 | 53    | 66   | 0  | 38.5  | 29 | T | GRAAPQNIPPASNA               | A | -0.7  | 11.04 |               |
| 88  | Cg1429    | 2 | 1457.7263 | -1.4 | 71    | 83   | 0  | 47.8  | 29 | T | AFERPDNQSAKPV                | A | -1.2  | 7.02  |               |
| 88  | Cg1429    | 2 | 1471.6579 | -1.0 | 134   | 146  | 0  | 26.3  | 25 | I | SRPEEPGYQPEPS                | Y | -2.2  | 3.96  |               |
| 88  | Cg1429    | 1 | 1589.6522 | -3.0 | 147   | 161  | 0  | 19.3  | 18 | S | YSEPYTDSDFAPAGA              | A | -0.7  | 2.88  |               |
| 88  | Cg1429    | 2 | 1764.8754 | -2.3 | 53    | 70   | 0  | 57.0  | 29 | T | GRAAPQNIPPASNAEETT           | A | -0.7  | 6.98  |               |
| 89  | Cg0738    | 1 | 640.416   | 2.0  | 807   | 812  | 0  | 26.8  | 23 | G | VSILPI                       | T | 2.4   | 6.02  |               |
| 89  | Cg0738    | 1 | 910.5851  | 3.2  | 673   | 681  | 0  | 26.7  | 24 | S | LGKTLGIPL                    | F | 1.0   | 10.1  |               |
| 90  | Cg3178    | 1 | 656.3745  | 1.2  | 141   | 146  | 0  | 27.1  | 26 | G | ISDLPI                       | G | 1.2   | 3.1   |               |
| 91  | Cg3356    | 1 | 640.4523  | -0.9 | 18    | 23   | 0  | 28.6  | 25 | A | IILGII                       | C | 3.6   | 6.02  |               |
| 91  | Cg3356    | 1 | 915.4662  | -0.4 | 371   | 380  | 0  | 38.7  | 29 | A | NVTGDGAIIV                   | I | 0.8   | 3.1   |               |
| 91  | Cg3356    | 1 | 1435.6983 | -2.0 | 114   | 126  | 0  | 41.4  | 29 | I | DLDAGALQPYFNI                | E | 0.1   | 2.92  |               |
| 91  | Cg3356    | 2 | 1706.8475 | -0.6 | 260   | 274  | 0  | 37.1  | 29 | V | TYQQTLKNDVDVNVVA             | G | -0.6  | 3.88  |               |
| 92  | Cg2590    | 1 | 539.3683  | -0.2 | 53    | 57   | 0  | 26.2  | 23 | A | VIVPL                        | L | 3.0   | 6.02  |               |
| 92  | Cg2590    | 1 | 651.3666  | 0.6  | 351   | 355  | 0  | 24.1  | 17 | G | FMIIL                        | G | 3.5   | 6.02  | Oxidation (M) |
| 92  | Cg2590    | 1 | 757.4772  | -3.8 | 352   | 358  | 0  | 24.2  | 23 | F | MILGVL                       | P | 3.2   | 6.02  |               |
| 93  | Cg1701    | 1 | 557.3425  | 2.0  | 1009  | 1013 | 0  | 28.2  | 28 | D | DVVIL                        | E | 2.6   | 3.1   |               |
| 94  | Cg0275    | 1 | 1098.7053 | -1.5 | 302   | 311  | 0  | 27.0  | 19 | V | VLALFIPLLT                   | G | 2.6   | 6.02  |               |
| 94  | Cg0275    | 2 | 1439.6205 | 1.7  | 74    | 85   | 0  | 37.8  | 24 | L | DYFADLDPDDRIV                | S | -1.0  | 3.3   |               |
| 95  | Cg2811    | 1 | 730.4047  | -1.2 | 652   | 658  | 0  | 39.1  | 28 | D | AIGNMII                      | S | 1.9   | 6.02  |               |
| 95  | Cg2811    | 1 | 1333.6765 | 0.4  | 693   | 704  | 0  | 41.0  | 29 | T | NLEDAVADYIVI                 | S | 0.8   | 2.88  |               |
| 97  | Cg2111    | 1 | 553.3839  | 1.1  | 881   | 885  | 0  | 26.4  | 24 | T | VLIPI                        | P | 3.1   | 6.02  |               |
| 97  | Cg2111    | 1 | 1066.5699 | -2.4 | 199   | 207  | 0  | 27.6  | 27 | L | NIDFILGYL                    | R | 1.2   | 3.1   |               |
| 98  | Cg0229    | 1 | 509.3213  | -0.2 | 630   | 634  | 0  | 30.4  | 21 | A | PIPAL                        | L | 1.4   | 6.02  |               |
| 98  | Cg0229    | 1 | 526.3115  | 0.8  | 1351  | 1355 | 0  | 32.0  | 30 | N | PNIIA                        | G | 1.1   | 6.02  |               |
| 98  | Cg0229    | 1 | 557.3425  | 2.0  | 1039  | 1043 | 0  | 28.2  | 28 | A | DVCLI                        | S | 2.6   | 3.1   |               |
| 98  | Cg0229    | 1 | 656.3745  | -1.2 | 1203  | 1208 | 0  | 34.5  | 27 | H | LDLSPI                       | F | 1.0   | 3.1   |               |
| 98  | Cg0229    | 2 | 1166.6408 | -3.0 | 1026  | 1038 | 0  | 28.9  | 26 | G | VGTVAAAGVSKAHA               | D | 0.8   | 10.1  |               |
| 99  | Cg2496    | 2 | 1859.8497 | -0.6 | 463   | 481  | 0  | 69.7  | 26 | I | SDEINEAGQLKQSAGADGA          | R | -0.8  | 3.58  |               |
| 99  | Cg2496    | 2 | 2484.2343 | -1.0 | 454   | 476  | 0  | 59.1  | 30 | A | NVADLIQEISDEINEAGQLKQSA      | G | -0.4  | 3.5   |               |
| 99  | Cg2496    | 2 | 2855.3784 | -3.1 | 454   | 481  | 0  | 99.1  | 30 | A | NVADLIQEISDEINEAGQLKQSAGADGA | R | -0.4  | 3.38  |               |
| 100 | Cg2052    | 1 | 667.3694  | 0.1  | 204   | 209  | 0  | 30.1  | 16 | I | PWVGPI                       | S | 0.7   | 6.02  |               |
| 100 | Cg2052    | 1 | 996.4917  | 0.2  | 190   | 198  | 0  | 29.8  | 29 | A | AFYGDVNLV                    | A | 0.9   | 3.1   |               |
| 100 | Cg2052    | 1 | 1138.6175 | -0.4 | 200   | 209  | 0  | 39.3  | 25 | A | FPNIPWVGPI                   | S | 0.6   | 6.02  |               |
| 100 | Cg2052    | 2 | 1197.6102 | 0.3  | 178   | 190  | 0  | 41.4  | 27 | T | SNPRGGIEGGLAA                | F | -0.3  | 6.98  |               |
| 100 | Cg2052    | 1 | 1209.6546 | -1.7 | 199   | 209  | 0  | 33.4  | 26 | V | AFPNIWVGPI                   | S | 0.7   | 6.02  |               |
| 100 | Cg2052    | 2 | 1399.7056 | -0.8 | 176   | 190  | 0  | 30.8  | 29 | V | TTSNPRGGIEGGLAA              | F | -0.3  | 6.98  |               |
| 100 | Cg2052    | 2 | 2165.0277 | -1.1 | 40    | 59   | 0  | 69.4  | 29 | A | FAEFERTTAEDVANGVPEAI         | A | -0.2  | 3.58  |               |
| 101 | Cg2157    | 1 | 642.3952  | 1.2  | 251   | 256  | 0  | 27.2  | 27 | F | LLDGLL                       | D | 1.9   | 3.1   |               |
| 101 | Cg2157    | 1 | 655.3217  | 2.0  | 136   | 140  | 0  | 22.8  | 22 | S | DVFI                         | F | 1.3   | 3.1   |               |
| 101 | Cg2157    | 1 | 864.4085  | 0.0  | 208   | 215  | 0  | 33.5  | 27 | V | SIGMVLDL                     | F | 1.5   | 3.1   |               |

| hit | accession | z | mass      | ppm  | start | end | mc | score | id | - | sequence                         | + | gravy | pl   | modification  |
|-----|-----------|---|-----------|------|-------|-----|----|-------|----|---|----------------------------------|---|-------|------|---------------|
| 101 | Cg2157    | 1 | 1267.67   | -2.4 | 224   | 234 | 0  | 28.9  | 27 | A | IYGITTEPYIV                      | F | 0.7   | 3.3  |               |
| 101 | Cg2157    | 1 | 1665.8111 | -0.7 | 282   | 296 | 0  | 64.7  | 29 | A | LHENNLPFINGGENV                  | S | -0.5  | 4.24 |               |
| 101 | Cg2157    | 2 | 1839.7435 | -0.1 | 342   | 357 | 0  | 52.9  | 17 | A | KYEGDNWETGEEPETG                 | S | -2.2  | 3.5  |               |
| 101 | Cg2157    | 2 | 2044.0126 | -1.0 | 278   | 296 | 0  | 32.4  | 30 | L | GLHALHENNLPFINGGENV              | S | -0.3  | 5.12 |               |
| 101 | Cg2157    | 2 | 2305.0573 | -0.3 | 153   | 171 | 0  | 31.5  | 27 | L | LWDEVDRTPETDPNMFII               | K | -0.7  | 3.32 |               |
| 102 | Cg0507    | 1 | 584.3897  | 1.5  | 532   | 537 | 0  | 31.7  | 31 | A | IIGIVA                           | L | 3.2   | 6.02 |               |
| 103 | Cg3100    | 2 | 1576.7621 | 1.8  | 261   | 274 | 0  | 45.4  | 29 | V | DADKNPLFLDETLS                   | R | -0.6  | 3.5  |               |
| 104 | Cg1367    | 1 | 1101.5917 | -2.9 | 100   | 109 | 0  | 30.3  | 29 | A | AELEKLLAES                       | G | 0.0   | 3.96 |               |
| 104 | Cg1367    | 2 | 1548.7559 | -0.3 | 215   | 227 | 0  | 77.7  | 29 | V | IEDEIFEKGEDLL                    | S | -0.5  | 3.44 |               |
| 104 | Cg1367    | 2 | 1630.8526 | -1.0 | 281   | 295 | 0  | 75.5  | 30 | S | ATDNATELVKDLSRV                  | A | -0.3  | 4.3  |               |
| 104 | Cg1367    | 2 | 1701.8897 | -2.0 | 281   | 296 | 0  | 63.6  | 30 | S | ATDNATELVKDLSRVA                 | N | -0.2  | 4.3  |               |
| 104 | Cg1367    | 2 | 2015.0283 | -4.3 | 281   | 299 | 0  | 79.5  | 30 | S | ATDNATELVKDLSRVANQA              | R | -0.4  | 4.3  |               |
| 105 | Cg0583    | 1 | 812.4028  | -1.5 | 478   | 485 | 0  | 28.3  | 26 | A | NIGDPQVA                         | Y | -0.3  | 3.1  |               |
| 105 | Cg0583    | 1 | 819.3473  | 1.5  | 405   | 411 | 0  | 25.6  | 22 | S | MDFPDPV                          | I | -0.2  | 2.92 |               |
| 105 | Cg0583    | 1 | 1376.646  | -1.2 | 169   | 181 | 0  | 38.8  | 28 | I | GAEDNFDGVIDLL                    | E | 0.2   | 2.78 |               |
| 105 | Cg0583    | 1 | 1656.8069 | -3.3 | 397   | 411 | 0  | 30.5  | 28 | A | NAPIILESMDFPDPV                  | I | 0.3   | 2.88 |               |
| 106 | Cg3255    | 1 | 980.4927  | -2.7 | 87    | 96  | 0  | 28.3  | 27 | I | GHTIAEGSPI                       | D | 0.0   | 5.12 |               |
| 106 | Cg3255    | 2 | 1146.5517 | -1.1 | 10    | 21  | 0  | 30.2  | 29 | V | AVDGS DASKQAV                    | R | -0.2  | 3.88 |               |
| 106 | Cg3255    | 2 | 1202.6547 | -0.2 | 226   | 236 | 0  | 47.0  | 28 | L | APLVEKYPSVT                      | V | 0.1   | 6.86 |               |
| 106 | Cg3255    | 1 | 1221.5257 | 0.7  | 97    | 107 | 0  | 24.1  | 23 | I | DMLLEMSPDAT                      | M | 0.0   | 2.88 |               |
| 106 | Cg3255    | 2 | 2185.0976 | -1.7 | 52    | 70  | 0  | 55.0  | 30 | G | MVPPQELFDDLQAEALEKI              | N | -0.2  | 3.5  |               |
| 106 | Cg3255    | 2 | 3659.7415 | -4.1 | 39    | 70  | 0  | 31.9  | 29 | A | SSYTMPQFLYAEGMVPPQELFDDLQAEALEKI | N | -0.2  | 3.44 |               |
| 107 | Cg3019    | 1 | 656.3745  | -1.4 | 548   | 553 | 0  | 27.3  | 27 | V | TVDIPI                           | T | 1.2   | 3.1  |               |
| 107 | Cg3019    | 1 | 793.5677  | 0.0  | 664   | 670 | 0  | 25.6  | 13 | L | LIPLLIL                          | Y | 3.2   | 6.02 |               |
| 107 | Cg3019    | 1 | 1893.9837 | -0.4 | 560   | 578 | 0  | 40.7  | 29 | V | WIAPGTQLSGVLPDGV DGI             | A | 0.5   | 2.92 |               |
| 109 | Cg0040    | 2 | 1391.6429 | -0.1 | 269   | 281 | 0  | 27.4  | 27 | V | QAPDSYGRIGNQS                    | G | -1.3  | 6.7  |               |
| 109 | Cg0040    | 2 | 1430.7042 | -0.5 | 141   | 153 | 0  | 38.8  | 29 | T | DITYSTDKPGHV V                   | N | -0.5  | 5.1  |               |
| 109 | Cg0040    | 2 | 1471.6943 | -0.2 | 389   | 401 | 0  | 71.8  | 27 | A | YVSDPSNNELHV V                   | D | -0.4  | 4.06 |               |
| 109 | Cg0040    | 2 | 1595.7832 | 0.6  | 161   | 175 | 0  | 31.1  | 29 | V | LFGDGDGKI QIFDTA                 | S | 0.0   | 3.6  |               |
| 109 | Cg0040    | 2 | 1694.8516 | 0.6  | 160   | 175 | 0  | 51.4  | 29 | T | VLFGDGDGKI QIFDTA                | S | 0.3   | 3.6  |               |
| 109 | Cg0040    | 2 | 2032.945  | -1.6 | 269   | 288 | 0  | 27.4  | 27 | V | QAPDSYGRIGNQSGSDVSPV             | V | -0.8  | 3.88 |               |
| 110 | Cg2425    | 1 | 595.304   | 1.7  | 1     | 5   | 0  | 28.5  | 28 | - | MSFLV                            | E | 2.4   | 6.02 |               |
| 110 | Cg2425    | 1 | 759.4565  | -4.1 | 369   | 375 | 0  | 26.4  | 26 | G | LMIGVLV                          | G | 3.1   | 6.02 | Oxidation (M) |
| 110 | Cg2425    | 2 | 973.4465  | -0.9 | 255   | 263 | 0  | 24.2  | 24 | V | GADEELNRA                        | E | -1.3  | 3.82 |               |
| 110 | Cg2425    | 2 | 1335.7285 | -0.7 | 210   | 221 | 0  | 39.1  | 27 | A | DLPALENIPELL                     | N | 0.4   | 2.94 |               |
| 110 | Cg2425    | 1 | 1505.8341 | -1.6 | 208   | 221 | 0  | 27.9  | 26 | T | VADLPALENIPELL                   | N | 0.7   | 2.94 |               |
| 111 | Cg0015    | 1 | 1401.6776 | 4.1  | 268   | 279 | 0  | 29.3  | 29 | I | TELPYQVNP DNL                    | I | -0.9  | 3    |               |
| 112 | Cg2677    | 1 | 1031.5652 | 0.4  | 240   | 250 | 0  | 29.2  | 29 | A | GILFGELV GGA                     | V | 1.4   | 3.3  |               |
| 112 | Cg2677    | 1 | 1560.7784 | -2.1 | 39    | 52  | 0  | 75.5  | 30 | A | RYSSPDLGLSPEQI                   | A | -0.7  | 4.08 |               |
| 112 | Cg2677    | 2 | 1848.072  | -0.8 | 187   | 203 | 0  | 72.7  | 23 | I | PITAPLAQVLRISIEEV                | K | 0.8   | 4.26 |               |

| hit | accession | z | mass      | ppm  | start | end | mc | score | id | - | sequence               | + | gravy | pl   | modification  |
|-----|-----------|---|-----------|------|-------|-----|----|-------|----|---|------------------------|---|-------|------|---------------|
| 112 | Cg2677    | 2 | 2375.4039 | 1.2  | 182   | 203 | 0  | 54.5  | 20 | T | ITLSIPITAPLAQVLIRSIEEV | K | 1.1   | 4.26 |               |
| 113 | Cg1730    | 2 | 1034.5145 | -1.5 | 242   | 250 | 0  | 57.8  | 28 | A | RYLQAQGEA              | R | -1.0  | 6.88 |               |
| 113 | Cg1730    | 2 | 1200.6098 | -1.3 | 220   | 230 | 0  | 37.4  | 29 | A | SILNAEAERQA            | M | -0.5  | 4.26 |               |
| 113 | Cg1730    | 2 | 1570.9083 | 0.0  | 43    | 57  | 0  | 35.3  | 25 | T | VSGGLTLLVPFVDRV        | R | 1.3   | 6.78 |               |
| 113 | Cg1730    | 1 | 1852.7639 | -2.5 | 334   | 349 | 0  | 58.8  | 18 | A | DNVEDWVFSTESDPEIA      | A | -1.0  | 2.72 |               |
| 114 | Cg2338    | 1 | 509.3213  | -0.2 | 485   | 489 | 0  | 30.4  | 21 | E | LPPAI                  | M | 1.4   | 6.02 |               |
| 115 | Cg3161    | 1 | 551.3683  | 0.9  | 357   | 361 | 0  | 34.3  | 18 | T | IPLPL                  | Q | 1.8   | 6.02 |               |
| 115 | Cg3161    | 1 | 686.4214  | 0.6  | 546   | 551 | 0  | 39.8  | 26 | G | EILSLL                 | D | 1.9   | 3.3  |               |
| 115 | Cg3161    | 1 | 853.5021  | 2.8  | 446   | 453 | 0  | 35.1  | 25 | W | AVRDAIPL               | V | 0.8   | 6.78 |               |
| 116 | Cg2323    | 1 | 543.3057  | -0.9 | 175   | 179 | 0  | 27.7  | 17 | L | FPIAP                  | G | 1.2   | 6.02 |               |
| 117 | Cg0486    | 1 | 577.3475  | 2.3  | 738   | 742 | 0  | 28.1  | 28 | I | IYGLL                  | A | 2.1   | 5.92 |               |
| 117 | Cg0486    | 1 | 786.4851  | -0.6 | 414   | 421 | 0  | 34.3  | 27 | T | LGISLTIA               | G | 2.1   | 6.02 |               |
| 117 | Cg0486    | 1 | 980.5001  | 2.0  | 17    | 26  | 0  | 28.5  | 27 | L | GTAFLCGSLL             | L | 1.6   | 5.32 |               |
| 118 | Cg3398    | 1 | 707.4582  | 2.0  | 613   | 619 | 0  | 20.9  | 16 | I | ILPVAVP                | P | 2.2   | 6.02 |               |
| 119 | Cg2546    | 1 | 635.3716  | -4.9 | 160   | 164 | 0  | 20.5  | 19 | T | MFIIIL                 | A | 3.5   | 6.02 |               |
| 119 | Cg2546    | 1 | 651.3666  | 0.6  | 160   | 164 | 0  | 24.1  | 17 | T | MFIIIL                 | A | 3.5   | 6.02 | Oxidation (M) |
| 119 | Cg2546    | 1 | 674.4367  | 1.5  | 229   | 234 | 0  | 25.0  | 24 | L | IFLGIL                 | I | 3.2   | 6.02 |               |
| 119 | Cg2546    | 1 | 767.5157  | 0.9  | 234   | 240 | 0  | 21.4  | 19 | I | LIPVILT                | I | 2.6   | 6.02 |               |
| 120 | Cg1664    | 1 | 622.4054  | -0.6 | 189   | 194 | 0  | 17.6  | 17 | V | IPAPLI                 | V | 1.9   | 6.02 |               |
| 120 | Cg1664    | 1 | 632.3897  | -1.3 | 171   | 176 | 0  | 29.3  | 27 | P | LFALGI                 | G | 2.7   | 6.02 |               |
| 120 | Cg1664    | 1 | 854.5113  | 0.9  | 47    | 54  | 0  | 30.0  | 23 | A | LALIPESI               | A | 1.6   | 3.3  |               |
| 121 | Cg0835    | 1 | 1093.6019 | -2.3 | 2     | 11  | 0  | 39.8  | 25 | M | ATVTFDKVTI             | R | 0.8   | 6.76 |               |
| 121 | Cg0835    | 2 | 1685.7857 | -1.7 | 65    | 80  | 0  | 57.7  | 28 | I | DGKDVTGQEPARDIA        | M | -1.3  | 3.76 |               |
| 122 | Cg1054    | 1 | 757.4772  | -3.8 | 649   | 655 | 0  | 23.9  | 23 | P | IMLIGLV                | F | 3.2   | 6.02 |               |
| 123 | Cg1238    | 1 | 583.4309  | -0.2 | 76    | 80  | 0  | 24.1  | 18 | K | IIIIIL                 | P | 4.4   | 6.02 |               |
| 123 | Cg1238    | 1 | 680.4836  | 0.6  | 77    | 82  | 0  | 36.2  | 15 | I | IIILPI                 | A | 3.4   | 6.02 |               |
| 123 | Cg1238    | 1 | 751.5207  | 0.9  | 79    | 85  | 0  | 20.0  | 17 | I | ILPIALL                | L | 2.9   | 6.02 |               |
| 123 | Cg1238    | 1 | 864.6048  | -0.9 | 78    | 85  | 0  | 20.8  | 13 | I | IILPIALL               | L | 3.1   | 6.02 |               |
| 123 | Cg1238    | 1 | 1085.591  | -1.5 | 88    | 97  | 0  | 29.1  | 28 | S | AFAPWALTPI             | L | 1.2   | 6.02 |               |
| 123 | Cg1238    | 1 | 1177.8049 | -1.7 | 77    | 87  | 0  | 22.7  | 13 | I | IIILPIALLS             | A | 3.0   | 6.02 |               |
| 123 | Cg1238    | 1 | 1268.6976 | -1.2 | 2     | 15  | 0  | 34.5  | 27 | M | AGGLAALLDDVAAI         | T | 1.5   | 2.92 |               |
| 123 | Cg1238    | 1 | 1369.7453 | -2.3 | 2     | 16  | 0  | 33.4  | 28 | M | AGGLAALLDDVAAIT        | R | 1.4   | 2.92 |               |
| 123 | Cg1238    | 2 | 2042.0685 | -2.5 | 39    | 58  | 0  | 53.7  | 30 | A | GVVVDDTAVTPQYVQGVKPA   | R | 0.2   | 3.88 |               |
| 126 | Cg3125    | 1 | 950.4817  | 2.4  | 1     | 8   | 0  | 36.9  | 28 | - | MDILSLLM               | E | 1.9   | 3.1  | Oxidation (M) |
| 127 | Cg1661    | 1 | 539.3683  | -0.2 | 275   | 279 | 0  | 26.5  | 23 | S | LVVLP                  | L | 2.9   | 6.02 |               |
| 127 | Cg1661    | 1 | 680.4836  | 0.6  | 172   | 177 | 0  | 36.2  | 15 | L | LILIPL                 | V | 3.1   | 6.02 |               |
| 127 | Cg1661    | 1 | 686.4214  | 1.6  | 299   | 304 | 0  | 22.8  | 21 | Q | TLVELI                 | G | 2.0   | 3.3  |               |
| 127 | Cg1661    | 1 | 730.4993  | 0.0  | 170   | 175 | 0  | 22.2  | 16 | F | FLLILI                 | P | 3.9   | 6.02 |               |
| 127 | Cg1661    | 1 | 902.4605  | 0.2  | 201   | 208 | 0  | 32.7  | 29 | A | EAIMVPLM               | M | 1.6   | 3.3  |               |
| 128 | Cg0732    | 1 | 630.3775  | -4.8 | 427   | 432 | 0  | 27.2  | 27 | L | VCALLI                 | A | 3.4   | 5.32 |               |

| hit | accession | z | mass      | ppm  | start | end | mc | score | id | - | sequence                             | + | gravy | pl   | modification |
|-----|-----------|---|-----------|------|-------|-----|----|-------|----|---|--------------------------------------|---|-------|------|--------------|
| 128 | Cg0732    | 1 | 667.3945  | -0.7 | 242   | 246 | 0  | 23.2  | 15 | R | YFLLL                                | A | 2.6   | 5.92 |              |
| 128 | Cg0732    | 1 | 711.4894  | -1.3 | 473   | 479 | 0  | 30.7  | 25 | A | LIAVILA                              | G | 3.5   | 6.02 |              |
| 129 | Cg3174    | 1 | 557.3425  | 2.0  | 69    | 73  | 0  | 28.2  | 28 | G | DVLL                                 | F | 2.5   | 3.1  |              |
| 130 | Cg0845    | 1 | 826.48    | -1.7 | 266   | 273 | 0  | 28.7  | 25 | A | PTAELIL                              | A | 1.2   | 3.3  |              |
| 131 | Cg0414    | 1 | 640.4523  | -0.9 | 179   | 184 | 0  | 28.6  | 25 | N | ILLGLL                               | V | 3.2   | 6.02 |              |
| 131 | Cg0414    | 1 | 787.3963  | -1.7 | 88    | 94  | 0  | 32.2  | 28 | V | DELGLEL                              | T | 0.1   | 2.94 |              |
| 131 | Cg0414    | 2 | 1198.583  | -2.5 | 457   | 467 | 0  | 42.3  | 26 | I | NAPKPDNTELT                          | T | -1.5  | 4.08 |              |
| 131 | Cg0414    | 2 | 1632.9086 | -1.2 | 221   | 235 | 0  | 55.6  | 26 | G | GIIADSEVEKHPLII                      | K | 0.5   | 4.42 |              |
| 132 | Cg1579    | 1 | 1038.5233 | -0.8 | 62    | 71  | 0  | 57.3  | 26 | A | VEEPAVEAPV                           | E | 0.3   | 3.02 |              |
| 132 | Cg1579    | 1 | 1857.9472 | 0.4  | 81    | 98  | 0  | 46.6  | 30 | V | EQAPVVEQAPVEQAPAPV                   | Q | -0.2  | 3.02 |              |
| 132 | Cg1579    | 2 | 2254.1481 | -1.6 | 77    | 98  | 0  | 71.4  | 30 | V | EAPVEQAPVVEQAPVEQAPAPV               | Q | -0.1  | 2.96 |              |
| 132 | Cg1579    | 2 | 2652.2568 | -3.0 | 106   | 134 | 0  | 79.6  | 28 | V | EQAPAPVQEAPAADAPPALPGGGGGHAGY        | - | -0.4  | 3.82 |              |
| 132 | Cg1579    | 2 | 3344.6062 | -3.1 | 99    | 134 | 0  | 81.6  | 30 | V | QEAPAPVEQAPAPVQEAPAADAPPALPGGGGGHAGY | - | -0.4  | 3.68 |              |
| 133 | Cg3419    | 1 | 786.4851  | -0.8 | 285   | 292 | 0  | 29.7  | 27 | I | GVTLITAI                             | M | 2.0   | 6.02 |              |
| 134 | Cg3026    | 1 | 722.4003  | 1.1  | 384   | 389 | 0  | 23.2  | 23 | I | LYFIPA                               | I | 1.7   | 5.92 |              |
| 134 | Cg3026    | 1 | 1251.7301 | -3.6 | 10    | 20  | 0  | 34.2  | 23 | V | PLIPYMVPLPI                          | I | 1.4   | 5.92 |              |
| 134 | Cg3026    | 1 | 1970.1202 | -1.2 | 4     | 20  | 0  | 48.8  | 26 | S | LYETLVPLIPYMVPLPI                    | I | 1.3   | 3.3  |              |
| 135 | Cg0468    | 1 | 773.4283  | -1.3 | 310   | 318 | 0  | 30.2  | 30 | L | GGAALISVS                            | D | 1.5   | 6.02 |              |
| 135 | Cg0468    | 2 | 2126.1987 | -0.8 | 316   | 335 | 0  | 35.3  | 26 | I | SVSDILARTLIPYADLPIGI                 | F | 0.9   | 3.88 |              |
| 136 | Cg1790    | 1 | 585.3737  | 1.5  | 114   | 118 | 0  | 27.8  | 25 | G | DILL                                 | E | 2.5   | 3.1  |              |
| 137 | Cg2949    | 1 | 900.4076  | -1.9 | 98    | 105 | 0  | 26.6  | 24 | V | ELDDAEPI                             | E | -0.7  | 2.84 |              |
| 137 | Cg2949    | 2 | 1202.5528 | -1.2 | 173   | 184 | 0  | 42.0  | 27 | S | GVENREVGGDTA                         | E | -0.9  | 3.82 |              |
| 137 | Cg2949    | 1 | 1504.7562 | -3.5 | 136   | 150 | 0  | 41.9  | 29 | T | SLENPGFAYGGVVPV                      | E | 0.5   | 3.3  |              |
| 137 | Cg2949    | 2 | 1531.7114 | 0.5  | 170   | 184 | 0  | 29.0  | 28 | V | LESGVENREVGGDTA                      | E | -0.7  | 3.68 |              |
| 137 | Cg2949    | 2 | 1885.9017 | -0.8 | 166   | 184 | 0  | 62.9  | 28 | V | SAPVLESGVENREVGGDTA                  | E | -0.4  | 3.68 |              |
| 137 | Cg2949    | 2 | 2272.0819 | -2.8 | 162   | 184 | 0  | 32.1  | 29 | I | DATVSAPVLESGVENREVGGDTA              | E | -0.2  | 3.5  |              |
| 137 | Cg2949    | 2 | 3465.6788 | -0.1 | 151   | 184 | 0  | 42.0  | 31 | V | EFVFDTGAITIDATVSAPVLESGVENREVGGDTA   | E | 0.2   | 3.32 |              |
| 141 | Cg1359    | 1 | 630.3775  | -4.8 | 358   | 363 | 0  | 27.2  | 27 | S | ICGILI                               | A | 3.2   | 5.32 |              |
| 141 | Cg1359    | 1 | 758.436   | -3.0 | 359   | 366 | 0  | 35.0  | 27 | I | CGILIAVA                             | V | 2.8   | 5.32 |              |
| 141 | Cg1359    | 1 | 782.5266  | 1.3  | 244   | 251 | 0  | 32.7  | 25 | M | LIGLLAA                              | A | 2.9   | 6.02 |              |
| 142 | Cg1744    | 1 | 601.3873  | 0.8  | 838   | 842 | 0  | 22.9  | 16 | A | LMLIL                                | Q | 3.6   | 6.02 |              |
| 143 | Cg0235    | 1 | 823.5392  | 4.6  | 478   | 484 | 0  | 16.4  | 16 | Y | RRLPLIG                              | A | 0.2   | 12.4 |              |
| 143 | Cg0235    | 1 | 1365.63   | -2.5 | 207   | 219 | 0  | 29.6  | 27 | T | GVYTELVDDPSTA                        | S | -0.2  | 2.88 |              |
| 144 | Cg1111    | 2 | 1756.957  | -1.1 | 213   | 228 | 0  | 44.1  | 28 | G | STREALDLIVEAIEKA                     | G | 0.1   | 4.16 |              |
| 144 | Cg1111    | 2 | 2414.1085 | -0.5 | 71    | 92  | 0  | 45.6  | 27 | V | NEEIGDELAGLEADDQRLIDEA               | M | -0.8  | 3.2  |              |
| 144 | Cg1111    | 2 | 2855.3308 | -2.5 | 67    | 92  | 0  | 80.8  | 28 | A | VENVNEEIGDELAGLEADDQRLIDEA           | M | -0.6  | 3.16 |              |
| 146 | Cg2684    | 1 | 1369.6952 | -2.6 | 14    | 25  | 0  | 28.6  | 28 | A | LGPSWLDPMELL                         | S | 0.4   | 3    |              |
| 146 | Cg2684    | 1 | 1369.703  | -1.0 | 68    | 79  | 0  | 33.3  | 28 | A | NQADPFAPLWLV                         | L | 0.3   | 3.1  |              |
| 146 | Cg2684    | 1 | 1401.7908 | -0.9 | 44    | 56  | 0  | 37.2  | 27 | V | FIESGLLFPLLP                         | D | 1.3   | 3.3  |              |
| 146 | Cg2684    | 1 | 1456.7272 | -3.2 | 14    | 26  | 0  | 30.9  | 29 | A | LGPSWLDPMELLS                        | G | 0.3   | 3    |              |

| hit | accession | z | mass      | ppm  | start | end | mc | score | id | - | sequence                           | + | gravy | pl    | modification  |
|-----|-----------|---|-----------|------|-------|-----|----|-------|----|---|------------------------------------|---|-------|-------|---------------|
| 146 | Cg2684    | 1 | 1901.9233 | -2.8 | 14    | 31  | 0  | 33.4  | 29 | A | LGPSWLDPMELLSGSGPFF                | G | 0.2   | 3     |               |
| 146 | Cg2684    | 2 | 2045.9768 | -0.7 | 14    | 33  | 0  | 45.6  | 29 | A | LGPSWLDPMELLSGSGPFFGS              | F | 0.1   | 3     |               |
| 148 | Cg0336    | 1 | 972.44    | -1.2 | 321   | 329 | 0  | 36.3  | 24 | L | TLDPDVQDA                          | A | -0.7  | 2.82  |               |
| 148 | Cg0336    | 1 | 1227.6095 | -2.9 | 453   | 464 | 0  | 31.2  | 27 | T | LQDALAQSPNTA                       | F | -0.3  | 3.1   |               |
| 148 | Cg0336    | 1 | 1355.7813 | -2.1 | 16    | 30  | 0  | 30.0  | 26 | V | AAGVLGALALVPFAS                    | L | 1.9   | 6.02  |               |
| 148 | Cg0336    | 2 | 1400.6896 | 0.5  | 46    | 59  | 0  | 53.3  | 29 | T | NLSDLTDGRGPGVT                     | T | -0.6  | 3.88  |               |
| 149 | Cg2641    | 1 | 553.3839  | 1.1  | 301   | 305 | 0  | 26.4  | 24 | D | LVLPI                              | D | 2.9   | 6.02  |               |
| 149 | Cg2641    | 1 | 949.5233  | 3.5  | 839   | 846 | 0  | 30.0  | 28 | E | YEIARLVS                           | S | 0.5   | 6.88  |               |
| 150 | Cg0236    | 1 | 1810.9406 | -0.9 | 201   | 216 | 0  | 33.9  | 29 | A | NLLGLPGWEAFQPWAI                   | V | 0.4   | 3.3   |               |
| 150 | Cg0236    | 1 | 1910.009  | -2.4 | 201   | 217 | 0  | 40.8  | 29 | A | NLLGLPGWEAFQPWAIW                  | S | 0.6   | 3.3   |               |
| 151 | Cg2846    | 1 | 815.3524  | 0.4  | 70    | 76  | 0  | 24.9  | 24 | S | AMDYFGI                            | R | 0.8   | 3.1   |               |
| 151 | Cg2846    | 1 | 1061.5393 | 0.2  | 145   | 154 | 0  | 35.8  | 30 | V | AYNLPGVDTL                         | N | 0.3   | 3.1   |               |
| 151 | Cg2846    | 1 | 1146.5557 | -0.4 | 266   | 276 | 0  | 41.6  | 29 | A | NIDFGSGPVEL                        | N | 0.1   | 3     |               |
| 151 | Cg2846    | 3 | 3759.9359 | -0.1 | 145   | 178 | 0  | 56.0  | 32 | V | AYNLPGVDTLNLDTNIIAQIFKGEITKWNDIAIA | S | 0.0   | 3.84  |               |
| 152 | Cg1312    | 1 | 731.3887  | 2.3  | 109   | 115 | 0  | 34.0  | 28 | M | MGALDLL                            | E | 1.6   | 3.1   |               |
| 152 | Cg1312    | 1 | 836.5735  | -0.5 | 60    | 67  | 0  | 26.7  | 18 | S | LLVPLGI                            | A | 2.7   | 6.02  |               |
| 152 | Cg1312    | 1 | 1107.7267 | -1.4 | 59    | 69  | 0  | 19.2  | 18 | L | SLLVPLLGIAI                        | M | 2.5   | 6.02  |               |
| 152 | Cg1312    | 2 | 1166.5244 | -1.8 | 125   | 133 | 0  | 37.0  | 27 | T | YEIENWDKA                          | K | -1.5  | 3.82  |               |
| 152 | Cg1312    | 1 | 1418.6235 | -2.5 | 109   | 121 | 0  | 64.2  | 24 | M | MGALDLEDEDEQA                      | A | -0.3  | 2.76  |               |
| 152 | Cg1312    | 1 | 1489.6606 | -1.3 | 109   | 122 | 0  | 63.3  | 24 | M | MGALDLEDEDEQAA                     | K | -0.2  | 2.76  |               |
| 152 | Cg1312    | 1 | 1549.664  | -1.9 | 108   | 121 | 0  | 42.1  | 22 | K | MMGALDLEDEDEQA                     | A | -0.2  | 2.76  |               |
| 153 | Cg2196    | 1 | 672.4211  | 0.6  | 103   | 108 | 0  | 29.6  | 23 | G | LVVFPV                             | V | 2.9   | 6.02  |               |
| 153 | Cg2196    | 1 | 780.329   | 0.3  | 61    | 67  | 0  | 41.9  | 28 | G | DQEGYGI                            | D | -1.2  | 3     |               |
| 153 | Cg2196    | 2 | 1028.627  | -1.0 | 99    | 108 | 0  | 29.9  | 25 | T | SVLGLVFPV                          | V | 2.4   | 6.02  |               |
| 153 | Cg2196    | 1 | 1032.6008 | 1.7  | 104   | 112 | 0  | 31.5  | 22 | L | VVFPVVNFL                          | K | 2.3   | 6.02  |               |
| 153 | Cg2196    | 1 | 1202.7064 | -0.8 | 102   | 112 | 0  | 28.4  | 24 | L | GLVFPVVNFL                         | K | 2.2   | 6.02  |               |
| 153 | Cg2196    | 3 | 2318.3766 | -0.7 | 99    | 119 | 0  | 39.2  | 20 | T | SVLGLVFPVVNFLKYNGLIK               | - | 1.3   | 10.18 |               |
| 154 | Cg2568    | 1 | 617.4152  | -0.5 | 329   | 333 | 0  | 25.8  | 21 | M | FILL                               | I | 3.7   | 6.02  |               |
| 154 | Cg2568    | 1 | 635.3716  | -4.9 | 328   | 332 | 0  | 20.5  | 19 | M | MFILL                              | L | 3.4   | 6.02  |               |
| 154 | Cg2568    | 1 | 651.3666  | 0.6  | 328   | 332 | 0  | 24.1  | 17 | M | MFILL                              | L | 3.4   | 6.02  | Oxidation (M) |
| 154 | Cg2568    | 1 | 730.4993  | 0.0  | 329   | 334 | 0  | 22.2  | 16 | M | FILLI                              | G | 3.9   | 6.02  |               |
| 156 | Cg2095    | 1 | 551.3683  | 0.9  | 347   | 351 | 0  | 34.3  | 18 | H | LPLPI                              | K | 1.8   | 6.02  |               |
| 156 | Cg2095    | 1 | 678.3741  | 4.9  | 280   | 284 | 0  | 23.3  | 23 | A | TWIFI                              | A | 2.0   | 6.02  |               |
| 157 | Cg2990    | 1 | 782.5266  | 1.3  | 208   | 215 | 0  | 31.6  | 25 | V | VALLLAIA                           | A | 3.2   | 6.02  |               |
| 158 | Cg3060    | 1 | 583.4309  | -0.2 | 135   | 139 | 0  | 24.1  | 18 | E | ILLIL                              | V | 4.1   | 6.02  |               |
| 158 | Cg3060    | 1 | 640.416   | 2.0  | 370   | 375 | 0  | 26.8  | 23 | V | VISLPL                             | K | 2.3   | 6.02  |               |
| 158 | Cg3060    | 1 | 712.4734  | -0.6 | 134   | 139 | 0  | 39.9  | 22 | T | EILLIL                             | V | 2.8   | 3.3   |               |
| 158 | Cg3060    | 1 | 1335.7147 | 2.2  | 254   | 266 | 0  | 29.5  | 27 | V | NSAIQLLDVAGHV                      | V | 0.7   | 4.94  |               |
| 159 | Cg3346    | 1 | 557.3425  | 2.0  | 350   | 354 | 0  | 28.2  | 28 | L | VDVLL                              | E | 2.5   | 3.1   |               |
| 159 | Cg3346    | 2 | 900.4415  | 2.4  | 335   | 342 | 0  | 28.0  | 26 | T | LFGATYMV                           | L | 1.5   | 5.92  |               |

| hit | accession | z | mass      | ppm  | start | end | mc | score | id | - | sequence                   | + | gravy | pl   | modification  |
|-----|-----------|---|-----------|------|-------|-----|----|-------|----|---|----------------------------|---|-------|------|---------------|
| 160 | Cg0161    | 1 | 1111.6601 | -3.3 | 269   | 278 | 0  | 35.2  | 25 | A | RLLTDATLPL                 | A | 0.6   | 6.78 |               |
| 160 | Cg0161    | 2 | 2648.4425 | -1.6 | 51    | 76  | 0  | 39.3  | 28 | A | KELPLAFDVPAGTVPQSLSGTLQIPA | E | 0.3   | 4.08 |               |
| 161 | Cg0286    | 1 | 782.4367  | -1.2 | 76    | 81  | 0  | 34.8  | 20 | A | FFLFPI                     | S | 2.5   | 6.02 |               |
| 161 | Cg0286    | 1 | 1039.6351 | 0.9  | 223   | 231 | 0  | 43.7  | 23 | T | LLEVILMPI                  | T | 2.4   | 3.3  |               |
| 161 | Cg0286    | 2 | 1317.7292 | -0.3 | 148   | 160 | 0  | 29.3  | 27 | A | SLAGYIVGQLLNA              | K | 1.1   | 5.92 |               |
| 161 | Cg0286    | 1 | 1734.9233 | -1.5 | 66    | 81  | 0  | 32.5  | 29 | V | EIGPLVTDGAFFLFPI           | S | 1.2   | 3    |               |
| 162 | Cg0206    | 1 | 1068.6947 | -1.1 | 435   | 444 | 0  | 35.9  | 19 | A | LFLIPLIGAL                 | S | 2.7   | 6.02 |               |
| 162 | Cg0206    | 1 | 1139.7318 | -1.4 | 434   | 444 | 0  | 24.2  | 19 | A | ALFLIPLIGAL                | S | 2.6   | 6.02 |               |
| 163 | Cg0992    | 1 | 793.5677  | 0.0  | 171   | 177 | 0  | 25.6  | 13 | A | ILPLLI                     | I | 3.3   | 6.02 |               |
| 163 | Cg0992    | 1 | 1177.805  | -1.8 | 170   | 180 | 0  | 22.2  | 13 | D | AILPLLIIVT                 | A | 3.0   | 6.02 |               |
| 164 | Cg2958    | 1 | 980.4087  | 0.1  | 67    | 75  | 0  | 36.1  | 25 | A | NFDSAIDEA                  | A | -0.4  | 2.88 |               |
| 164 | Cg2958    | 2 | 1407.7722 | -0.1 | 220   | 233 | 0  | 40.5  | 26 | A | LGRPSVPEDVAGLV             | S | 0.4   | 4.08 |               |
| 164 | Cg2958    | 2 | 1421.6674 | -0.1 | 67    | 79  | 0  | 45.4  | 28 | A | NFDSAIDEAAEKL              | G | -0.4  | 3.58 |               |
| 164 | Cg2958    | 2 | 2408.1496 | -1.1 | 67    | 89  | 0  | 63.1  | 29 | A | NFDSAIDEAAEKLGGFDVLVNNNA   | G | 0.0   | 3.42 |               |
| 164 | Cg2958    | 2 | 2649.2922 | -2.2 | 67    | 92  | 0  | 95.6  | 30 | A | NFDSAIDEAAEKLGGFDVLVNNAGIA | Q | 0.2   | 3.42 |               |
| 165 | Cg1658    | 1 | 571.3403  | 0.5  | 321   | 325 | 0  | 23.2  | 21 | A | IMIPV                      | S | 2.7   | 6.02 |               |
| 165 | Cg1658    | 1 | 640.4523  | -0.9 | 119   | 124 | 0  | 28.6  | 25 | T | ILIGLL                     | P | 3.3   | 6.02 |               |
| 165 | Cg1658    | 1 | 651.3666  | 0.6  | 190   | 194 | 0  | 24.1  | 17 | G | FMLIL                      | V | 3.4   | 6.02 | Oxidation (M) |
| 165 | Cg1658    | 1 | 759.4565  | -4.1 | 191   | 197 | 0  | 34.1  | 26 | F | MLILGV                     | L | 3.1   | 6.02 | Oxidation (M) |
| 166 | Cg3245    | 1 | 553.3839  | 1.1  | 35    | 39  | 0  | 26.4  | 24 | T | LVIPI                      | I | 3.1   | 6.02 |               |
| 166 | Cg3245    | 1 | 1026.6511 | -3.5 | 211   | 220 | 0  | 36.2  | 23 | G | LAMGLIALLL                 | A | 2.9   | 6.02 |               |
| 168 | Cg1227    | 1 | 704.4109  | 2.1  | 82    | 87  | 0  | 23.5  | 23 | A | IFVEVV                     | A | 2.7   | 3.3  |               |
| 168 | Cg1227    | 1 | 1035.5601 | -0.7 | 95    | 104 | 0  | 31.8  | 26 | A | LASQFGISTI                 | Y | 1.1   | 6.02 |               |
| 168 | Cg1227    | 1 | 1265.7132 | -0.8 | 49    | 61  | 0  | 26.3  | 24 | A | FHALTPGLGGIAI              | G | 1.3   | 7.84 |               |
| 169 | Cg0324    | 1 | 553.3839  | 1.1  | 5     | 9   | 0  | 26.4  | 24 | D | VLLPI                      | F | 2.9   | 6.02 |               |
| 169 | Cg0324    | 1 | 700.3829  | -0.6 | 136   | 141 | 0  | 31.2  | 19 | I | EVMLLP                     | S | 1.4   | 3.3  |               |
| 169 | Cg0324    | 1 | 854.5266  | -0.8 | 8     | 15  | 0  | 36.7  | 25 | L | PIFVAVPL                   | A | 2.3   | 6.02 |               |
| 169 | Cg0324    | 1 | 996.6008  | -0.8 | 8     | 17  | 0  | 27.0  | 25 | L | PIFVAVPLAA                 | S | 2.2   | 6.02 |               |
| 170 | Cg2388    | 1 | 1039.4934 | -1.8 | 295   | 304 | 0  | 25.6  | 25 | A | NAQVPDAQPT                 | D | -1.0  | 3.1  |               |
| 170 | Cg2388    | 1 | 1711.9244 | -2.9 | 234   | 250 | 0  | 35.7  | 29 | S | SLIDGVPSLIDELVATA          | T | 1.0   | 2.88 |               |
| 171 | Cg3216    | 1 | 557.3247  | -0.7 | 131   | 135 | 0  | 27.7  | 19 | V | VMLPV                      | I | 2.5   | 6.02 |               |
| 171 | Cg3216    | 2 | 1412.5804 | -1.3 | 221   | 234 | 0  | 40.1  | 21 | L | SGGAQEDDQPQNPA             | N | -1.8  | 2.88 |               |
| 172 | Cg1399    | 1 | 642.3588  | -0.8 | 221   | 226 | 0  | 33.6  | 27 | L | DPLSIV                     | L | 1.1   | 3.1  |               |
| 172 | Cg1399    | 1 | 651.3666  | 0.6  | 45    | 49  | 0  | 24.1  | 17 | F | FMILL                      | D | 3.4   | 6.02 | Oxidation (M) |
| 173 | Cg1231    | 1 | 630.3775  | -4.8 | 112   | 117 | 0  | 27.2  | 27 | V | GLCLLI                     | G | 3.0   | 5.32 |               |
| 173 | Cg1231    | 1 | 698.4578  | 1.0  | 76    | 81  | 0  | 23.2  | 22 | I | IEVILI                     | C | 3.0   | 3.3  |               |
| 173 | Cg1231    | 1 | 878.5841  | -1.8 | 23    | 30  | 0  | 31.0  | 13 | F | IIPLITLP                   | S | 2.2   | 6.02 |               |
| 174 | Cg0885    | 1 | 758.4174  | -0.7 | 394   | 400 | 0  | 39.9  | 32 | E | SLNAIEL                    | E | 0.9   | 3.3  |               |
| 175 | Cg2243    | 1 | 709.4738  | 1.8  | 199   | 205 | 0  | 23.3  | 21 | L | VALIVVP                    | W | 3.0   | 6.02 |               |
| 176 | Cg2263    | 1 | 915.5025  | 3.5  | 967   | 974 | 0  | 31.5  | 31 | E | TQQKALLD                   | M | -0.7  | 6.76 |               |

| hit | accession | z | mass      | ppm  | start | end | mc | score | id | - | sequence                    | + | gravy | pl   | modification  |
|-----|-----------|---|-----------|------|-------|-----|----|-------|----|---|-----------------------------|---|-------|------|---------------|
| 177 | Cg1795    | 2 | 1258.6193 | -0.1 | 684   | 695 | 0  | 28.3  | 28 | K | LAEAVYEGLHAS                | K | 0.4   | 4.24 |               |
| 179 | Cg2739    | 1 | 553.3839  | 1.1  | 315   | 319 | 0  | 26.4  | 24 | G | LVLLP                       | G | 2.8   | 6.02 |               |
| 179 | Cg2739    | 1 | 557.3247  | 0.2  | 180   | 184 | 0  | 23.0  | 19 | V | MVPLV                       | F | 2.5   | 6.02 |               |
| 179 | Cg2739    | 1 | 820.4364  | 0.2  | 347   | 354 | 0  | 33.6  | 30 | G | GMSLVVIS                    | L | 2.1   | 6.02 | Oxidation (M) |
| 180 | Cg0417    | 1 | 553.3839  | 1.1  | 123   | 127 | 0  | 26.4  | 24 | L | LVIPL                       | A | 2.9   | 6.02 |               |
| 180 | Cg0417    | 1 | 684.4244  | -4.4 | 121   | 126 | 0  | 24.8  | 18 | V | MLLVIP                      | L | 2.8   | 6.02 |               |
| 180 | Cg0417    | 1 | 690.3952  | 0.7  | 23    | 28  | 0  | 26.1  | 26 | L | FLIDAL                      | A | 2.2   | 3.1  |               |
| 181 | Cg2279    | 1 | 698.4327  | -1.0 | 224   | 230 | 0  | 37.9  | 28 | R | QGLIVGI                     | R | 1.8   | 6.02 |               |
| 181 | Cg2279    | 1 | 1014.6114 | 0.0  | 29    | 38  | 0  | 37.3  | 27 | L | LTAALIVFPA                  | W | 2.2   | 6.02 |               |
| 182 | Cg0082    | 1 | 545.3213  | -0.2 | 374   | 378 | 0  | 29.7  | 26 | A | PLFGL                       | I | 1.7   | 6.02 |               |
| 182 | Cg0082    | 1 | 664.3618  | -3.0 | 314   | 319 | 0  | 25.1  | 24 | T | AMFLLA                      | F | 2.7   | 6.02 |               |
| 182 | Cg0082    | 2 | 1039.5008 | -3.1 | 362   | 372 | 0  | 31.4  | 28 | L | GAAAFLLSTTMA                | A | 1.2   | 6.02 |               |
| 183 | Cg3079    | 2 | 981.4767  | -0.8 | 2     | 10  | 0  | 36.9  | 27 | M | SSFNPSTTKT                  | N | -1.1  | 10.1 |               |
| 183 | Cg3079    | 2 | 1083.5309 | -1.7 | 22    | 32  | 0  | 60.7  | 27 | A | SSAGNPDIRPA                 | H | -0.8  | 6.78 |               |
| 184 | Cg1103    | 1 | 869.5222  | -0.3 | 113   | 121 | 0  | 29.7  | 27 | I | TSIPLGIGI                   | A | 1.5   | 6.02 |               |
| 185 | Cg0868    | 1 | 685.401   | 1.0  | 149   | 155 | 0  | 39.4  | 30 | L | GLEVGVI                     | L | 1.8   | 3.3  |               |
| 185 | Cg0868    | 1 | 801.4492  | -3.4 | 768   | 774 | 0  | 33.5  | 28 | R | MVLMPIVI                    | D | 2.7   | 6.02 |               |
| 186 | Cg2393    | 1 | 640.4523  | 0.3  | 619   | 624 | 0  | 30.8  | 25 | W | ILGILL                      | N | 3.3   | 6.02 |               |
| 186 | Cg2393    | 1 | 850.5892  | -0.8 | 715   | 722 | 0  | 18.6  | 16 | L | LPLIAVLL                    | R | 3.0   | 6.02 |               |
| 186 | Cg2393    | 1 | 963.6732  | -0.6 | 711   | 719 | 0  | 18.6  | 13 | H | LVLLLPLIA                   | V | 3.1   | 6.02 |               |
| 187 | Cg0238    | 2 | 1383.7497 | 1.4  | 41    | 53  | 0  | 30.3  | 28 | V | LTPDLDIIVDAV                | R | 1.0   | 2.82 |               |
| 187 | Cg0238    | 2 | 1865.0564 | 0.8  | 125   | 141 | 0  | 34.2  | 26 | A | ALPYGLWVPVLPGRQV            | T | 0.5   | 9.84 |               |
| 188 | Cg0998    | 1 | 1432.7086 | -1.7 | 208   | 221 | 0  | 37.4  | 29 | A | DFIAGDPSTDIIVI              | K | 0.7   | 2.82 |               |
| 188 | Cg0998    | 2 | 2535.3544 | -1.0 | 385   | 408 | 0  | 33.9  | 29 | A | GLQPGDIVTKLNDRVIDSPDSLIA    | A | 0.0   | 3.88 |               |
| 190 | Cg3252    | 2 | 1749.8938 | -1.3 | 142   | 157 | 0  | 52.3  | 29 | I | GFLTPEEVESFLAGRV            | S | 0.3   | 3.96 |               |
| 190 | Cg3252    | 2 | 2225.1368 | -2.1 | 138   | 157 | 0  | 64.9  | 30 | V | FQSIGFLTPEEVESFLAGRV        | S | 0.4   | 3.96 |               |
| 191 | Cg0314    | 1 | 539.3683  | -0.2 | 220   | 224 | 0  | 26.5  | 23 | A | LVVIP                       | G | 3.0   | 6.02 |               |
| 191 | Cg0314    | 1 | 674.4367  | 1.5  | 234   | 239 | 0  | 25.0  | 24 | L | IFLGLL                      | T | 3.1   | 6.02 |               |
| 191 | Cg0314    | 1 | 775.4844  | 0.9  | 235   | 241 | 0  | 23.3  | 23 | I | FLGLLTI                     | R | 2.5   | 6.02 |               |
| 191 | Cg0314    | 1 | 775.4844  | 0.0  | 234   | 240 | 0  | 24.2  | 23 | L | IFLGLLT                     | I | 2.5   | 6.02 |               |
| 191 | Cg0314    | 1 | 1026.6437 | 3.7  | 202   | 210 | 0  | 32.7  | 23 | R | TKKQIPSL                    | L | -0.3  | 10.6 |               |
| 192 | Cg2812    | 1 | 896.3916  | -0.1 | 163   | 169 | 0  | 27.1  | 26 | S | WFDEITS                     | R | -0.3  | 3    |               |
| 192 | Cg2812    | 1 | 1317.6452 | -0.8 | 263   | 273 | 0  | 37.2  | 29 | V | NQLFDPTIEEI                 | L | -0.4  | 2.94 |               |
| 192 | Cg2812    | 1 | 1495.6943 | -1.1 | 160   | 171 | 0  | 62.8  | 27 | I | DQSWFDEITSRL                | G | -0.9  | 3.7  |               |
| 192 | Cg2812    | 2 | 2277.0761 | 0.5  | 206   | 226 | 0  | 30.8  | 29 | I | FGDEPTGNLDSNSSREVLDIL       | R | -0.6  | 3.42 |               |
| 192 | Cg2812    | 2 | 2986.4957 | -2.0 | 258   | 284 | 0  | 41.8  | 31 | A | DGRIVNQLFDPTIEEILATMNGIEDIA | - | 0.1   | 3.38 |               |
| 194 | Cg2675    | 1 | 862.4986  | -4.6 | 205   | 212 | 0  | 30.4  | 27 | E | LGMGILFI                    | T | 2.6   | 6.02 |               |
| 194 | Cg2675    | 1 | 1169.6478 | -1.5 | 442   | 451 | 0  | 31.0  | 29 | A | RAMILEPELV                  | V | 0.7   | 4.26 |               |
| 194 | Cg2675    | 2 | 1943.9013 | -1.7 | 141   | 156 | 0  | 39.1  | 27 | V | GIDNPEVRYDQYPHEL            | S | -1.4  | 4.06 |               |
| 195 | Cg3301    | 1 | 1008.6583 | -1.8 | 390   | 399 | 0  | 23.9  | 20 | R | IASIAPLIV                   | P | 2.7   | 6.02 |               |

| hit | accession | z | mass      | ppm  | start | end | mc | score | id | - | sequence               | + | gravy | pl   | modification  |
|-----|-----------|---|-----------|------|-------|-----|----|-------|----|---|------------------------|---|-------|------|---------------|
| 195 | Cg3301    | 1 | 1150.675  | -1.5 | 400   | 411 | 0  | 36.9  | 22 | V | PPVIAFGGPIAL           | F | 1.5   | 6.02 |               |
| 195 | Cg3301    | 1 | 1773.0804 | -4.5 | 392   | 409 | 0  | 33.7  | 17 | A | SIIAPLIVPPVIAFGGPI     | A | 1.8   | 6.02 |               |
| 195 | Cg3301    | 1 | 1957.2016 | -2.6 | 392   | 411 | 0  | 51.9  | 16 | A | SIIAPLIVPPVIAFGGPIAL   | F | 1.9   | 6.02 |               |
| 197 | Cg0896    | 1 | 553.3839  | 1.1  | 117   | 121 | 0  | 26.4  | 24 | M | VIIPI                  | F | 3.2   | 6.02 |               |
| 197 | Cg0896    | 1 | 945.5688  | -3.5 | 21    | 28  | 0  | 27.0  | 23 | T | WIFAIIAL               | V | 2.9   | 6.02 |               |
| 198 | Cg2678    | 1 | 1428.7646 | -4.8 | 415   | 427 | 0  | 31.8  | 29 | T | MVQEQLGDLGIKV          | N | 0.3   | 4.08 |               |
| 199 | Cg0972    | 1 | 584.3897  | 1.5  | 173   | 178 | 0  | 31.7  | 31 | A | LLGLVA                 | A | 2.8   | 6.02 |               |
| 201 | Cg3015    | 1 | 632.3897  | -1.3 | 517   | 522 | 0  | 28.4  | 27 | Q | IFAGII                 | A | 3.0   | 6.02 |               |
| 202 | Cg0736    | 1 | 642.3952  | 1.2  | 56    | 61  | 0  | 43.8  | 27 | G | EVIGII                 | G | 2.3   | 3.3  |               |
| 202 | Cg0736    | 1 | 699.4167  | 1.1  | 56    | 62  | 0  | 41.6  | 30 | G | EVIGIIG                | Y | 1.9   | 3.3  |               |
| 202 | Cg0736    | 1 | 1340.7187 | -4.5 | 179   | 191 | 0  | 34.4  | 28 | A | LATNPTLLLDEA           | T | 0.5   | 3    |               |
| 202 | Cg0736    | 3 | 2549.2948 | -2.4 | 144   | 165 | 0  | 32.3  | 31 | A | RVQEMLEFVGLGDKGKNYPEQL | S | -0.7  | 4.64 |               |
| 203 | Cg3335    | 1 | 633.3486  | -0.6 | 135   | 140 | 0  | 28.9  | 28 | S | FGAINL                 | E | 1.5   | 6.02 |               |
| 203 | Cg3335    | 1 | 735.3803  | 1.0  | 260   | 266 | 0  | 31.5  | 30 | F | TGADLFI                | G | 1.2   | 3.1  |               |
| 203 | Cg3335    | 1 | 1059.5634 | -4.6 | 273   | 282 | 0  | 35.5  | 30 | N | IGEDALKLMA             | P | 0.6   | 4.08 |               |
| 206 | Cg3281    | 1 | 580.3584  | 1.0  | 686   | 691 | 0  | 23.4  | 18 | V | LLPPAA                 | A | 1.3   | 6.02 |               |
| 207 | Cg0508    | 1 | 645.3122  | 0.2  | 113   | 118 | 0  | 27.3  | 25 | V | LWAADA                 | A | 0.8   | 3.1  |               |
| 207 | Cg0508    | 1 | 1372.6796 | -2.0 | 332   | 343 | 0  | 38.4  | 29 | A | DIELMTPDLEVV           | T | 0.5   | 2.84 |               |
| 207 | Cg0508    | 1 | 1858.9234 | -3.9 | 332   | 348 | 0  | 46.9  | 29 | A | DIELMTPDLEVVTADKA      | A | 0.1   | 3.42 |               |
| 208 | Cg2893    | 1 | 601.3873  | 0.8  | 242   | 246 | 0  | 22.9  | 16 | V | IMLII                  | G | 3.8   | 6.02 |               |
| 208 | Cg2893    | 1 | 672.4058  | 2.8  | 262   | 267 | 0  | 28.8  | 24 | P | LLDLSL                 | F | 1.8   | 3.1  |               |
| 208 | Cg2893    | 1 | 715.4302  | 1.0  | 243   | 249 | 0  | 34.6  | 27 | I | MLIGAV                 | L | 2.9   | 6.02 |               |
| 208 | Cg2893    | 1 | 879.4524  | -2.6 | 115   | 123 | 0  | 26.8  | 26 | A | FLGIGAATM              | M | 1.7   | 6.02 |               |
| 208 | Cg2893    | 1 | 1014.6114 | -2.2 | 186   | 195 | 0  | 32.1  | 26 | I | ALIATLTVAP             | A | 2.2   | 6.02 |               |
| 209 | Cg1364    | 1 | 617.4152  | -0.5 | 37    | 41  | 0  | 25.8  | 21 | P | FLIIL                  | I | 3.9   | 6.02 |               |
| 209 | Cg1364    | 1 | 730.4993  | 0.0  | 37    | 42  | 0  | 22.2  | 16 | P | FLIILI                 | V | 4.0   | 6.02 |               |
| 209 | Cg1364    | 1 | 1119.5924 | -1.2 | 80    | 89  | 0  | 34.1  | 29 | A | ALEKYNAQLA             | E | -0.3  | 6.86 |               |
| 209 | Cg1364    | 2 | 1434.7355 | 0.9  | 171   | 183 | 0  | 37.4  | 28 | S | GTIDRFLADLDTV          | A | 0.3   | 3.6  |               |
| 209 | Cg1364    | 2 | 1901.9847 | -2.9 | 171   | 188 | 0  | 70.5  | 30 | S | GTIDRFLADLDTVAPNGK     | - | -0.2  | 4.18 |               |
| 210 | Cg0165    | 1 | 551.3683  | 2.2  | 332   | 336 | 0  | 25.9  | 18 | E | PIIPL                  | A | 1.9   | 6.02 |               |
| 210 | Cg0165    | 1 | 751.5207  | 0.9  | 333   | 339 | 0  | 20.0  | 17 | P | IIPLALI                | G | 3.0   | 6.02 |               |
| 210 | Cg0165    | 1 | 831.4776  | -2.9 | 244   | 250 | 0  | 23.5  | 23 | A | LVDMLLL                | V | 2.5   | 3.1  | Oxidation (M) |
| 212 | Cg3179    | 1 | 713.4323  | 2.0  | 329   | 335 | 0  | 34.3  | 27 | A | LDIIIIG                | S | 2.2   | 3.1  |               |
| 212 | Cg3179    | 2 | 800.4644  | 1.6  | 329   | 336 | 0  | 45.9  | 29 | A | LDIIIIGS               | E | 1.8   | 3.1  |               |
| 213 | Cg1016    | 1 | 709.4738  | 1.8  | 399   | 405 | 0  | 21.3  | 21 | I | LGVLLVP                | A | 2.5   | 6.02 |               |
| 213 | Cg1016    | 1 | 800.483   | -4.5 | 310   | 317 | 0  | 33.9  | 30 | N | MVLAALLA               | I | 2.9   | 6.02 |               |
| 214 | Cg2521    | 2 | 1429.8003 | 3.7  | 508   | 521 | 0  | 27.1  | 26 | A | MVVGDKPFVGLLV          | T | 1.4   | 6.76 |               |
| 215 | Cg1506    | 1 | 553.3839  | 1.3  | 134   | 138 | 0  | 24.5  | 24 | S | ILVPL                  | G | 2.9   | 6.02 |               |
| 215 | Cg1506    | 1 | 640.416   | 2.0  | 133   | 138 | 0  | 26.7  | 23 | V | SILVPL                 | G | 2.3   | 6.02 |               |
| 217 | Cg0561    | 1 | 789.4273  | 0.9  | 56    | 62  | 0  | 28.6  | 26 | I | SFLPEVV                | G | 1.3   | 3.3  |               |



| hit | accession | z | mass      | ppm  | start | end  | mc | score | id | - | sequence                      | + | gravy | pl   | modification |
|-----|-----------|---|-----------|------|-------|------|----|-------|----|---|-------------------------------|---|-------|------|--------------|
| 217 | Cg0561    | 2 | 1059.5197 | -1.7 | 44    | 55   | 0  | 58.9  | 28 | S | SGSDSKPGGGVI                  | S | -0.4  | 6.76 |              |
| 217 | Cg0561    | 1 | 1160.6441 | -2.3 | 98    | 108  | 0  | 53.8  | 27 | V | DFLAGLGVEKI                   | L | 0.8   | 4.08 |              |
| 217 | Cg0561    | 2 | 1403.766  | 0.9  | 95    | 108  | 0  | 35.8  | 27 | V | SGVDFLAGLGVEKI                | L | 0.9   | 4.08 |              |
| 217 | Cg0561    | 1 | 1830.9364 | -3.8 | 44    | 62   | 0  | 49.1  | 30 | S | SGSDSKPGGGVISFLPEVV           | G | 0.3   | 4.08 |              |
| 218 | Cg3046    | 2 | 754.4337  | 1.5  | 269   | 275  | 0  | 36.1  | 27 | Q | PDGVLRV                       | D | 0.3   | 6.78 |              |
| 219 | Cg1456    | 1 | 707.4582  | 2.0  | 48    | 54   | 0  | 20.9  | 16 | E | IPIGVP                        | N | 2.0   | 6.02 |              |
| 219 | Cg1456    | 1 | 726.3225  | -1.7 | 559   | 564  | 0  | 25.3  | 24 | L | DAFDL                         | A | 0.7   | 2.92 |              |
| 220 | Cg1247    | 1 | 824.3857  | 0.8  | 106   | 111  | 0  | 34.9  | 24 | A | QFFWPT                        | R | -0.2  | 6.02 |              |
| 220 | Cg1247    | 1 | 1109.5506 | -0.2 | 66    | 74   | 0  | 34.9  | 27 | V | NQPWVPQEI                     | K | -1.0  | 3.3  |              |
| 220 | Cg1247    | 1 | 1271.5994 | -1.1 | 184   | 196  | 0  | 52.2  | 27 | L | SNTGINPDGPSTI                 | S | -0.7  | 3.1  |              |
| 220 | Cg1247    | 2 | 2431.1326 | 0.0  | 82    | 105  | 0  | 102.8 | 28 | A | MGFITGDGSEGGDIEIPDNAPRIA      | Q | -0.2  | 3.42 |              |
| 221 | Cg0722    | 1 | 601.3873  | 0.8  | 565   | 569  | 0  | 22.9  | 16 | I | LMLLL                         | R | 3.4   | 6.02 |              |
| 221 | Cg0722    | 1 | 993.7202  | -4.4 | 556   | 564  | 0  | 14.0  | 13 | P | IVLLVILVI                     | L | 4.2   | 6.02 |              |
| 222 | Cg2939    | 1 | 601.3873  | 0.8  | 262   | 266  | 0  | 22.9  | 16 | G | LMILL                         | T | 3.6   | 6.02 |              |
| 222 | Cg2939    | 1 | 688.4523  | 0.1  | 36    | 41   | 0  | 24.4  | 21 | L | LIFLLA                        | I | 3.4   | 6.02 |              |
| 224 | Cg2971    | 1 | 527.3319  | 0.0  | 136   | 140  | 0  | 28.1  | 27 | T | LTVVP                         | A | 2.0   | 6.02 |              |
| 224 | Cg2971    | 1 | 876.5069  | 4.0  | 450   | 458  | 0  | 28.9  | 25 | A | AGTKVAFIA                     | G | 1.3   | 10.1 |              |
| 225 | Cg1883    | 1 | 752.4432  | -0.5 | 155   | 161  | 0  | 25.2  | 22 | V | KLDPIPA                       | R | -0.1  | 6.76 |              |
| 225 | Cg1883    | 2 | 2567.2854 | -3.4 | 137   | 161  | 0  | 64.0  | 31 | I | EAGDEVTVTLELADGSEVKLDPIPA     | R | 0.0   | 3.32 |              |
| 225 | Cg1883    | 2 | 2962.5023 | -4.9 | 133   | 161  | 0  | 66.9  | 31 | L | ANPIEAGDEVTVTLELADGSEVKLDPIPA | R | 0.0   | 3.32 |              |
| 227 | Cg0766    | 1 | 654.4064  | -0.5 | 88    | 93   | 0  | 24.2  | 23 | S | VPQLKA                        | A | 0.1   | 10.1 |              |
| 228 | Cg0489    | 2 | 1493.7249 | -0.1 | 74    | 87   | 0  | 31.7  | 29 | V | EAPKPEPAEEVEVA                | S | -0.9  | 3.68 |              |
| 228 | Cg0489    | 2 | 1939.9123 | -1.9 | 88    | 105  | 0  | 75.9  | 28 | A | SVEGDVDKQETPERPAPS            | N | -1.5  | 3.92 |              |
| 228 | Cg0489    | 2 | 2756.2811 | -2.0 | 88    | 112  | 0  | 41.1  | 27 | A | SVEGDVDKQETPERPAPSNEETMVL     | R | -1.1  | 3.74 |              |
| 229 | Cg2699    | 1 | 624.3272  | 1.6  | 559   | 563  | 0  | 24.4  | 22 | M | NFVFEV                        | I | 2.1   | 6.02 |              |
| 231 | Cg0864    | 1 | 685.4374  | 0.9  | 173   | 179  | 0  | 40.2  | 30 | L | SAALLIV                       | V | 2.7   | 6.02 |              |
| 231 | Cg0864    | 1 | 715.4302  | 1.0  | 13    | 19   | 0  | 34.6  | 27 | V | MILLGLG                       | M | 2.4   | 6.02 |              |
| 232 | Cg3418    | 1 | 551.3683  | 0.9  | 36    | 40   | 0  | 34.3  | 18 | A | LPIPL                         | D | 1.8   | 6.02 |              |
| 235 | Cg0047    | 2 | 943.5702  | 1.3  | 2     | 10   | 0  | 30.9  | 25 | M | STIGNLKLIV                    | V | 0.8   | 10.1 |              |
| 235 | Cg0047    | 1 | 1061.4149 | -1.8 | 237   | 246  | 0  | 27.0  | 19 | A | DAEQEAAEEA                    | E | -1.4  | 2.84 |              |
| 235 | Cg0047    | 2 | 1133.5353 | -2.1 | 40    | 50   | 0  | 47.8  | 28 | A | AGEYAPKAEQA                   | V | -1.0  | 4.26 |              |
| 235 | Cg0047    | 1 | 1285.7242 | -3.0 | 2     | 14   | 0  | 46.2  | 28 | M | STIGNLKLIVVDGA                | R | 0.7   | 6.76 |              |
| 235 | Cg0047    | 1 | 1306.5412 | -1.2 | 211   | 222  | 0  | 32.4  | 21 | A | TETPAETTEEEA                  | K | -1.5  | 2.9  |              |
| 235 | Cg0047    | 4 | 3159.4592 | -1.6 | 236   | 264  | 0  | 56.0  | 27 | E | ADAEQEAAEEAEAEAIQAEFDKKNAPQRT | Q | -1.3  | 3.86 |              |
| 236 | Cg1280    | 1 | 680.4836  | 2.2  | 1038  | 1043 | 0  | 23.9  | 15 | K | LILLLP                        | H | 3.0   | 6.02 |              |
| 236 | Cg1280    | 1 | 704.4109  | 1.4  | 771   | 776  | 0  | 23.5  | 23 | D | VFIDLIV                       | C | 2.7   | 3.1  |              |
| 237 | Cg1424    | 1 | 1305.7122 | -2.4 | 187   | 198  | 0  | 44.5  | 28 | A | SLIWFPLVGFGA                  | A | 1.6   | 6.02 |              |
| 237 | Cg1424    | 1 | 1376.7493 | -2.8 | 187   | 199  | 0  | 45.6  | 27 | A | SLIWFPLVGFGAA                 | A | 1.6   | 6.02 |              |
| 238 | Cg2201    | 1 | 676.3948  | 0.0  | 49    | 53   | 0  | 25.6  | 19 | A | WFLVL                         | S | 2.7   | 6.02 |              |
| 238 | Cg2201    | 1 | 775.4844  | 0.9  | 76    | 82   | 0  | 24.8  | 23 | F | FLAVLIT                       | T | 2.9   | 6.02 |              |

| hit | accession | z | mass      | ppm  | start | end | mc | score | id | - | sequence                    | + | gravy | pl    | modification  |
|-----|-----------|---|-----------|------|-------|-----|----|-------|----|---|-----------------------------|---|-------|-------|---------------|
| 240 | Cg2539    | 1 | 583.4309  | -0.2 | 247   | 251 | 0  | 24.1  | 18 | L | IILII                       | T | 4.4   | 6.02  |               |
| 240 | Cg2539    | 1 | 942.5538  | 2.4  | 404   | 412 | 0  | 25.1  | 24 | D | VPAALFNVL                   | Q | 1.9   | 6.02  |               |
| 240 | Cg2539    | 1 | 1485.6843 | -0.9 | 505   | 518 | 0  | 26.3  | 26 | M | MFSLKGMSEDAAA               | V | 0.5   | 4.08  | Oxidation (M) |
| 241 | Cg1864    | 1 | 624.3847  | 0.3  | 491   | 496 | 0  | 23.7  | 18 | E | VPSIPL                      | A | 1.4   | 6.02  |               |
| 241 | Cg1864    | 1 | 645.3122  | 0.2  | 485   | 489 | 0  | 25.4  | 25 | E | EQLWA                       | E | -0.5  | 3.3   |               |
| 241 | Cg1864    | 1 | 836.3916  | -0.2 | 159   | 165 | 0  | 40.8  | 30 | V | FKEDLGE                     | R | -1.2  | 3.82  |               |
| 242 | Cg0202    | 1 | 642.3701  | -2.6 | 330   | 335 | 0  | 37.8  | 29 | F | ININVA                      | S | 1.3   | 6.02  |               |
| 243 | Cg2183    | 1 | 851.5117  | 0.5  | 284   | 292 | 0  | 25.7  | 22 | L | GIGLPPSIV                   | S | 1.4   | 6.02  |               |
| 243 | Cg2183    | 1 | 1217.5776 | -0.9 | 44    | 56  | 0  | 31.6  | 28 | A | ATDETGLGAVDAV               | A | 0.4   | 2.88  |               |
| 243 | Cg2183    | 1 | 1412.8279 | -2.5 | 279   | 292 | 0  | 52.2  | 25 | A | TLSFLGIGLPPSIV              | S | 1.5   | 6.02  |               |
| 244 | Cg2212    | 1 | 573.3196  | 1.6  | 369   | 373 | 0  | 22.6  | 21 | R | TLLMP                       | R | 1.4   | 6.02  |               |
| 244 | Cg2212    | 1 | 632.3897  | -1.3 | 44    | 49  | 0  | 29.0  | 27 | I | FLALGL                      | G | 2.6   | 6.02  |               |
| 246 | Cg2173    | 1 | 601.3873  | 0.3  | 149   | 153 | 0  | 27.5  | 16 | P | LILMI                       | M | 3.7   | 6.02  |               |
| 246 | Cg2173    | 1 | 679.4268  | -1.2 | 179   | 185 | 0  | 25.0  | 21 | I | PGAILIP                     | I | 1.6   | 6.02  |               |
| 246 | Cg2173    | 1 | 715.4302  | 1.0  | 359   | 365 | 0  | 39.8  | 27 | A | MILGGI                      | V | 2.6   | 6.02  |               |
| 247 | Cg1498    | 1 | 599.3894  | 1.5  | 379   | 383 | 0  | 30.2  | 19 | A | LLEII                       | S | 2.6   | 3.3   |               |
| 248 | Cg2563    | 1 | 532.2645  | 1.1  | 182   | 186 | 0  | 30.8  | 29 | L | SAWGL                       | Y | 0.7   | 6.02  |               |
| 248 | Cg2563    | 1 | 617.4152  | -0.5 | 395   | 399 | 0  | 25.8  | 21 | S | FILIL                       | A | 3.9   | 6.02  |               |
| 248 | Cg2563    | 1 | 688.4523  | 0.1  | 395   | 400 | 0  | 28.6  | 21 | S | FILILA                      | F | 3.5   | 6.02  |               |
| 252 | Cg1867    | 2 | 1009.6535 | 0.6  | 465   | 475 | 0  | 23.7  | 21 | D | LAGIAGLIIGI                 | G | 2.5   | 6.02  |               |
| 252 | Cg1867    | 2 | 2454.9742 | -2.8 | 615   | 637 | 0  | 32.2  | 13 | A | STDNSSTDNSEAPGTDNTQEEEK     | - | -2.1  | 3.32  |               |
| 252 | Cg1867    | 2 | 2707.3453 | -0.9 | 359   | 383 | 0  | 54.2  | 30 | T | SITGDFTQTEAQDLANNLRYGALPL   | S | -0.3  | 3.7   |               |
| 252 | Cg1867    | 2 | 2879.4301 | -1.9 | 357   | 383 | 0  | 44.8  | 31 | S | ATSITGDFTQTEAQDLANNLRYGALPL | S | -0.2  | 3.7   |               |
| 256 | Cg0934    | 1 | 729.3909  | -1.1 | 64    | 70  | 0  | 33.1  | 31 | L | ELGVLEA                     | V | 0.9   | 3.12  |               |
| 257 | Cg3244    | 1 | 765.5     | -1.6 | 97    | 103 | 0  | 23.3  | 13 | L | TPLLLPI                     | I | 1.7   | 6.02  |               |
| 257 | Cg3244    | 1 | 878.5841  | -0.6 | 96    | 103 | 0  | 25.2  | 13 | V | LTPLLLPI                    | I | 2.0   | 6.02  |               |
| 257 | Cg3244    | 1 | 977.6525  | -1.4 | 95    | 103 | 0  | 15.4  | 13 | R | VLTPLLLPI                   | I | 2.2   | 6.02  |               |
| 257 | Cg3244    | 1 | 1133.7536 | -1.6 | 94    | 103 | 0  | 13.8  | 13 | A | RVLTPLLLPI                  | I | 1.6   | 11.04 |               |
| 257 | Cg3244    | 2 | 1485.7212 | 0.5  | 124   | 138 | 0  | 34.4  | 28 | A | GVTAEQLSQFAGHAA             | A | 0.1   | 5.12  |               |
| 257 | Cg3244    | 2 | 1845.9221 | -0.5 | 159   | 174 | 0  | 30.7  | 30 | A | GFVRDVEERLNELEAA            | A | -0.5  | 4     |               |
| 257 | Cg3244    | 3 | 2142.1029 | 0.4  | 194   | 211 | 0  | 52.9  | 30 | I | SRDLNQVSDQIQDRLLDK          | - | -1.2  | 4.34  |               |
| 259 | Cg2408    | 1 | 601.3873  | 0.8  | 122   | 126 | 0  | 22.9  | 16 | G | LMLLI                       | F | 3.6   | 6.02  |               |
| 259 | Cg2408    | 1 | 874.3345  | -2.1 | 71    | 77  | 0  | 29.2  | 18 | L | PEDWEEA                     | E | -2.1  | 2.88  |               |
| 259 | Cg2408    | 1 | 1456.6834 | -1.1 | 66    | 77  | 0  | 39.6  | 27 | V | RVDVLPEDWEEA                | E | -0.9  | 3.5   |               |
| 260 | Cg2735    | 1 | 645.297   | 0.2  | 34    | 39  | 0  | 35.7  | 31 | S | NLVDDA                      | K | -0.1  | 2.92  |               |
| 260 | Cg2735    | 2 | 1240.7139 | -1.5 | 79    | 88  | 0  | 30.0  | 26 | A | NDLKEIQRLL                  | S | -0.7  | 7.02  |               |
| 260 | Cg2735    | 1 | 1258.6153 | -0.8 | 34    | 45  | 0  | 63.7  | 29 | S | NLVDDAKNQATA                | K | -0.7  | 3.88  |               |
| 260 | Cg2735    | 2 | 1417.7049 | -0.9 | 21    | 33  | 0  | 73.2  | 29 | A | STLDELADRSKPS               | N | -1.1  | 4.3   |               |
| 260 | Cg2735    | 2 | 1612.8896 | -2.3 | 79    | 91  | 0  | 37.7  | 29 | A | NDLKEIQRLLSER               | - | -1.2  | 7.14  |               |
| 261 | Cg0752    | 1 | 757.397   | -0.8 | 308   | 314 | 0  | 32.3  | 29 | A | QAQVEIA                     | E | 0.3   | 3.3   |               |

| hit | accession | z | mass      | ppm  | start | end | mc | score | id | - | sequence      | + | gravy | pl    | modification  |
|-----|-----------|---|-----------|------|-------|-----|----|-------|----|---|---------------|---|-------|-------|---------------|
| 261 | Cg0752    | 1 | 797.4283  | -0.1 | 191   | 198 | 0  | 35.6  | 27 | S | LGAP EIQ A    | K | 0.4   | 3.3   |               |
| 261 | Cg0752    | 2 | 1485.7423 | -0.5 | 218   | 230 | 0  | 70.9  | 29 | S | RIANQEADLVEQT | Q | -0.8  | 3.82  |               |
| 262 | Cg0790    | 1 | 539.3683  | -0.2 | 379   | 383 | 0  | 26.2  | 23 | R | VIVLP         | L | 3.0   | 6.02  |               |
| 262 | Cg0790    | 1 | 553.3839  | 1.1  | 380   | 384 | 0  | 26.4  | 24 | V | IVLPL         | A | 2.9   | 6.02  |               |
| 263 | Cg2077    | 1 | 601.3873  | 0.3  | 161   | 165 | 0  | 27.5  | 16 | I | LLLML         | A | 3.4   | 6.02  |               |
| 263 | Cg2077    | 1 | 640.4523  | -0.9 | 210   | 215 | 0  | 28.6  | 25 | S | LILGIL        | T | 3.3   | 6.02  |               |
| 264 | Cg3371    | 1 | 680.4836  | 0.6  | 292   | 297 | 0  | 36.2  | 15 | G | LLILPL        | M | 3.0   | 6.02  |               |
| 264 | Cg3371    | 1 | 690.3952  | 0.7  | 167   | 172 | 0  | 26.1  | 26 | V | FLDIAI        | Q | 2.3   | 3.1   |               |
| 264 | Cg3371    | 1 | 1076.627  | -1.6 | 78    | 87  | 0  | 26.7  | 25 | I | TFGIFPLIGI    | G | 2.0   | 6.02  |               |
| 265 | Cg2406    | 1 | 645.2832  | -1.5 | 46    | 50  | 0  | 25.8  | 24 | A | MYFVS         | R | 1.4   | 5.92  |               |
| 265 | Cg2406    | 1 | 738.3701  | -1.5 | 87    | 93  | 0  | 28.6  | 27 | C | QFGVFAA       | E | 1.4   | 6.02  |               |
| 265 | Cg2406    | 2 | 842.4432  | -0.6 | 19    | 25  | 0  | 33.9  | 23 | A | LNRPNMV       | S | -0.5  | 11.04 |               |
| 265 | Cg2406    | 2 | 984.5175  | 0.4  | 17    | 25  | 0  | 35.0  | 23 | V | AALNRPNMV     | S | 0.0   | 11.04 |               |
| 265 | Cg2406    | 2 | 1100.5397 | -0.9 | 6     | 16  | 0  | 43.9  | 27 | V | GNTGMAAPQRV   | A | -0.4  | 11.04 |               |
| 265 | Cg2406    | 2 | 1116.5346 | -2.5 | 6     | 16  | 0  | 35.2  | 28 | V | GNTGMAAPQRV   | A | -0.4  | 11.04 | Oxidation (M) |
| 266 | Cg2884    | 1 | 553.3839  | 1.1  | 375   | 379 | 0  | 26.4  | 24 | L | LVLIP         | F | 2.9   | 6.02  |               |
| 266 | Cg2884    | 1 | 723.4895  | -0.3 | 373   | 379 | 0  | 35.3  | 21 | S | GLLVLIP       | F | 2.6   | 6.02  |               |
| 266 | Cg2884    | 1 | 725.4687  | -0.4 | 340   | 346 | 0  | 24.3  | 23 | I | LALSIPI       | S | 2.3   | 6.02  |               |
| 267 | Cg2840    | 1 | 1410.6667 | -2.9 | 241   | 253 | 0  | 46.3  | 27 | I | AGNFLDFLESEVA | A | 0.4   | 2.94  |               |
| 268 | Cg2642    | 1 | 1022.6124 | 3.2  | 387   | 398 | 0  | 22.2  | 21 | R | LGGIVGPAIGGL  | I | 1.6   | 6.02  |               |
| 269 | Cg1545    | 1 | 656.3931  | -4.7 | 16    | 21  | 0  | 31.0  | 20 | V | IPLMIA        | L | 2.5   | 6.02  |               |
| 269 | Cg1545    | 1 | 704.4473  | 0.6  | 105   | 110 | 0  | 22.7  | 22 | N | VTILFL        | G | 3.1   | 6.02  |               |
| 270 | Cg1212    | 1 | 617.4152  | -0.5 | 219   | 223 | 0  | 25.8  | 21 | I | FILLI         | C | 3.9   | 6.02  |               |
| 270 | Cg1212    | 1 | 730.4993  | 0.0  | 218   | 223 | 0  | 22.2  | 16 | G | IFILLI        | C | 4.0   | 6.02  |               |
| 272 | Cg1225    | 1 | 680.4836  | 0.6  | 182   | 187 | 0  | 36.2  | 15 | G | LILLPL        | L | 3.0   | 6.02  |               |
| 272 | Cg1225    | 2 | 726.4276  | 2.5  | 382   | 389 | 0  | 28.4  | 28 | R | LGAISGPL      | L | 1.3   | 6.02  |               |
| 272 | Cg1225    | 1 | 793.5677  | 0.0  | 182   | 188 | 0  | 16.1  | 13 | G | LILLPLL       | Y | 3.1   | 6.02  |               |
| 273 | Cg0831    | 1 | 785.4721  | 0.0  | 186   | 192 | 0  | 30.6  | 29 | R | MILLPLA       | A | 2.6   | 6.02  | Oxidation (M) |
| 273 | Cg0831    | 1 | 879.543   | -0.2 | 118   | 126 | 0  | 21.1  | 19 | F | PGIALVTPL     | F | 1.5   | 6.02  |               |
| 273 | Cg0831    | 1 | 1173.6468 | -3.2 | 116   | 126 | 0  | 31.8  | 27 | S | MFPGIALVTPL   | F | 1.7   | 6.02  | Oxidation (M) |
| 274 | Cg2339    | 1 | 836.5735  | -0.5 | 173   | 180 | 0  | 27.9  | 18 | T | LVLLPIAV      | I | 3.1   | 6.02  |               |
| 276 | Cg3165    | 1 | 585.3737  | 1.5  | 359   | 363 | 0  | 27.8  | 25 | R | DILII         | G | 2.8   | 3.1   |               |
| 276 | Cg3165    | 1 | 836.5735  | -0.5 | 128   | 135 | 0  | 28.0  | 18 | W | LLPLVVAL      | R | 3.0   | 6.02  |               |
| 277 | Cg1299    | 1 | 598.4418  | 1.7  | 319   | 323 | 0  | 28.1  | 17 | E | ILKLL         | S | 2.4   | 10.1  |               |
| 277 | Cg1299    | 1 | 878.5841  | -1.8 | 173   | 180 | 0  | 25.9  | 13 | A | IITLPLIP      | V | 2.2   | 6.02  |               |
| 280 | Cg2537    | 1 | 632.3897  | -1.3 | 223   | 228 | 0  | 28.1  | 27 | A | FIAGIL        | L | 2.8   | 6.02  |               |
| 281 | Cg1709    | 1 | 624.3483  | -0.2 | 7     | 12  | 0  | 24.2  | 24 | T | PEVPAL        | A | 0.5   | 3.3   |               |
| 282 | Cg3096    | 1 | 1138.6234 | -1.1 | 203   | 213 | 0  | 30.5  | 26 | I | NIIGDLIPEGV   | L | 0.8   | 3     |               |
| 283 | Cg3387    | 1 | 761.4072  | 0.3  | 340   | 347 | 0  | 34.1  | 27 | A | NIAFGAVA      | V | 1.6   | 6.02  |               |
| 284 | Cg1412    | 1 | 674.4367  | 1.5  | 110   | 115 | 0  | 25.0  | 24 | G | LFIGLL        | A | 3.1   | 6.02  |               |

| hit | accession | z | mass      | ppm  | start | end | mc | score | id | - | sequence               | + | gravy | pl   | modification |
|-----|-----------|---|-----------|------|-------|-----|----|-------|----|---|------------------------|---|-------|------|--------------|
| 284 | Cg1412    | 1 | 758.436   | -4.9 | 305   | 312 | 0  | 39.1  | 32 | V | IGCVIALA               | V | 2.8   | 5.32 |              |
| 286 | Cg2466    | 2 | 1197.5738 | -0.8 | 805   | 816 | 0  | 61.9  | 27 | A | QLRNPADAGEA            | F | -1.0  | 4.08 |              |
| 286 | Cg2466    | 2 | 2090.9579 | -4.4 | 251   | 269 | 0  | 46.2  | 26 | A | FLGDGEMDEPESRGLIQQA    | A | -0.7  | 3.5  |              |
| 287 | Cg2158    | 1 | 793.5677  | 0.0  | 280   | 286 | 0  | 15.0  | 13 | V | PILLLLL                | F | 3.1   | 6.02 |              |
| 287 | Cg2158    | 1 | 850.5892  | -0.1 | 278   | 285 | 0  | 18.8  | 16 | L | AVPILLLL               | L | 3.0   | 6.02 |              |
| 288 | Cg2192    | 1 | 820.4331  | 0.6  | 249   | 256 | 0  | 31.5  | 30 | A | GGYALDLL               | R | 1.0   | 3.1  |              |
| 288 | Cg2192    | 1 | 1034.4557 | -0.7 | 180   | 188 | 0  | 33.9  | 26 | I | SWIDEGTDI              | N | -0.5  | 2.88 |              |
| 290 | Cg2372    | 1 | 726.3225  | -1.7 | 99    | 104 | 0  | 25.3  | 24 | G | FADDFI                 | K | 0.8   | 2.92 |              |
| 290 | Cg2372    | 1 | 1863.9407 | -3.8 | 130   | 146 | 0  | 48.5  | 30 | I | FGFLVLQFPDENGLTPA      | S | 0.4   | 3    |              |
| 291 | Cg3132    | 1 | 617.4152  | -0.5 | 407   | 411 | 0  | 25.8  | 21 | V | FIILL                  | F | 3.9   | 6.02 |              |
| 291 | Cg3132    | 2 | 2580.2173 | -2.8 | 319   | 340 | 0  | 31.9  | 28 | T | EWLQDFVEKYPGKYDNPEGAPV | G | -1.1  | 3.92 |              |
| 292 | Cg1419    | 1 | 656.3931  | -4.4 | 89    | 94  | 0  | 25.4  | 20 | V | IMPLIA                 | L | 2.5   | 6.02 |              |
| 295 | Cg1787    | 1 | 526.3115  | 0.8  | 863   | 867 | 0  | 32.0  | 30 | D | NPLLA                  | R | 0.9   | 6.02 |              |
| 297 | Cg2125    | 1 | 577.3475  | 2.3  | 349   | 353 | 0  | 28.1  | 28 | V | LYGLI                  | G | 2.1   | 5.92 |              |
| 298 | Cg0061    | 1 | 532.2646  | 0.2  | 304   | 308 | 0  | 35.2  | 29 | S | WGGIT                  | G | 0.4   | 6.02 |              |
| 298 | Cg0061    | 1 | 571.3403  | 0.5  | 71    | 75  | 0  | 23.2  | 21 | Q | IMLPV                  | V | 2.6   | 6.02 |              |
| 298 | Cg0061    | 1 | 630.3741  | 0.6  | 251   | 255 | 0  | 27.2  | 27 | G | SWLLI                  | G | 2.1   | 6.02 |              |
| 298 | Cg0061    | 1 | 758.4327  | 1.3  | 251   | 257 | 0  | 36.4  | 27 | G | SWLLIGA                | V | 1.7   | 6.02 |              |
| 299 | Cg1234    | 1 | 695.4218  | 1.9  | 330   | 336 | 0  | 22.6  | 21 | A | PSVAPLL                | T | 1.4   | 6.02 |              |
| 301 | Cg2359    | 1 | 596.3534  | 0.0  | 849   | 854 | 0  | 26.6  | 22 | L | PLPGLT                 | V | 0.6   | 6.02 |              |
| 303 | Cg1219    | 1 | 553.3839  | 1.1  | 98    | 102 | 0  | 26.4  | 24 | T | VILPI                  | S | 3.1   | 6.02 |              |
| 304 | Cg0158    | 2 | 844.3095  | 4.6  | 334   | 341 | 0  | 18.5  | 17 | G | GMADMFS                | A | 0.4   | 3.1  |              |
| 305 | Cg3367    | 2 | 1762.889  | -1.6 | 282   | 296 | 0  | 40.0  | 29 | A | ASLEEIFLRHYGETV        | S | 0.0   | 4.54 |              |
| 305 | Cg3367    | 1 | 1971.9863 | -0.4 | 157   | 174 | 0  | 55.7  | 30 | L | IVDEPTAGLDPIEQVFV      | T | 0.6   | 2.84 |              |
| 305 | Cg3367    | 2 | 2222.1794 | -2.0 | 258   | 278 | 0  | 41.3  | 29 | C | DASEVPDILRIIIDAGGQDII  | S | 0.5   | 3.36 |              |
| 307 | Cg2258    | 1 | 585.3737  | 1.5  | 48    | 52  | 0  | 27.8  | 25 | L | DLILI                  | H | 2.6   | 3.1  |              |
| 307 | Cg2258    | 1 | 698.4578  | 1.0  | 47    | 52  | 0  | 28.2  | 22 | D | LDLILI                 | H | 2.8   | 3.1  |              |
| 308 | Cg1784    | 1 | 945.5171  | 0.6  | 205   | 212 | 0  | 36.1  | 30 | W | ALEKFPEI               | E | 0.0   | 4.26 |              |
| 309 | Cg3382    | 1 | 1009.6535 | -2.9 | 485   | 495 | 0  | 23.1  | 21 | V | AAIVLGAIVIA            | A | 3.0   | 6.02 |              |
| 310 | Cg0057    | 1 | 1009.5233 | 0.8  | 635   | 642 | 0  | 34.0  | 27 | V | RLFEDLA                | A | 0.4   | 4.08 |              |
| 310 | Cg0057    | 2 | 1100.59   | 3.6  | 136   | 145 | 0  | 32.5  | 29 | R | DVKPANIMIT             | N | 0.4   | 6.76 |              |
| 311 | Cg1435    | 1 | 656.3381  | -1.2 | 545   | 550 | 0  | 29.1  | 27 | A | EEVLPA                 | I | 0.2   | 3.12 |              |
| 312 | Cg2110    | 1 | 553.3839  | 1.3  | 336   | 340 | 0  | 24.5  | 24 | L | IIVLP                  | V | 3.1   | 6.02 |              |
| 312 | Cg2110    | 1 | 723.4895  | -0.3 | 334   | 340 | 0  | 21.2  | 21 | F | GLIIVLP                | V | 2.7   | 6.02 |              |
| 313 | Cg0980    | 1 | 684.3806  | 0.3  | 139   | 145 | 0  | 36.2  | 28 | A | NAIGTPI                | L | 0.7   | 6.02 |              |
| 313 | Cg0980    | 1 | 1109.5506 | -0.2 | 220   | 231 | 0  | 31.4  | 27 | A | GGGAVDPAPWLA           | E | 0.4   | 3.1  |              |
| 313 | Cg0980    | 2 | 1226.6255 | 1.2  | 102   | 113 | 0  | 51.6  | 28 | I | QADLDARGPSVV           | R | -0.2  | 3.88 |              |
| 313 | Cg0980    | 2 | 1778.9315 | -2.0 | 220   | 237 | 0  | 43.7  | 29 | A | GGGAVDPAPWLAERGITL     | - | 0.2   | 4.08 |              |
| 314 | Cg3334    | 1 | 577.3475  | 2.3  | 231   | 235 | 0  | 28.1  | 28 | T | YLGLI                  | I | 2.1   | 5.92 |              |
| 314 | Cg3334    | 1 | 688.4523  | 0.1  | 216   | 221 | 0  | 28.6  | 21 | V | IFLLLA                 | V | 3.4   | 6.02 |              |

| hit | accession | z | mass      | ppm  | start | end | mc | score | id | - | sequence                    | + | gravy | pl   | modification  |
|-----|-----------|---|-----------|------|-------|-----|----|-------|----|---|-----------------------------|---|-------|------|---------------|
| 317 | Cg2356    | 1 | 640.416   | 2.0  | 188   | 193 | 0  | 26.8  | 23 | S | VLSLPL                      | A | 2.2   | 6.02 |               |
| 319 | Cg1832    | 1 | 571.3403  | 0.5  | 305   | 309 | 0  | 23.2  | 21 | R | LMLPV                       | S | 2.4   | 6.02 |               |
| 320 | Cg1768    | 1 | 782.5266  | 1.3  | 60    | 67  | 0  | 31.6  | 25 | P | LVALIALA                    | N | 3.2   | 6.02 |               |
| 322 | Cg2643    | 1 | 539.3683  | -0.2 | 239   | 243 | 0  | 26.5  | 23 | E | LVVPL                       | A | 2.9   | 6.02 |               |
| 322 | Cg2643    | 1 | 981.5933  | -4.3 | 168   | 176 | 0  | 25.1  | 24 | D | PLIALPMVI                   | V | 2.4   | 6.02 | Oxidation (M) |
| 323 | Cg3101    | 1 | 1076.4848 | -0.4 | 180   | 188 | 0  | 35.7  | 26 | V | GIEDLMDWV                   | Q | 0.3   | 2.88 |               |
| 325 | Cg2552    | 1 | 598.4418  | 1.7  | 292   | 296 | 0  | 28.1  | 17 | T | LLKLI                       | A | 2.4   | 10.1 |               |
| 325 | Cg2552    | 1 | 642.3588  | 0.9  | 115   | 120 | 0  | 29.9  | 27 | L | IDVSLP                      | E | 1.1   | 3.1  |               |
| 326 | Cg1395    | 1 | 1334.6718 | -3.7 | 55    | 66  | 0  | 32.3  | 29 | M | GKTVLLNEFEDA                | A | -0.2  | 3.82 |               |
| 328 | Cg1195    | 1 | 1885.0237 | -3.7 | 232   | 248 | 0  | 36.0  | 28 | S | IPSIGDLEIWSLLPYAV           | G | 1.0   | 3    |               |
| 333 | Cg1142    | 1 | 704.4473  | 0.6  | 346   | 351 | 0  | 22.7  | 22 | W | VTIIFI                      | L | 3.3   | 6.02 |               |
| 333 | Cg1142    | 1 | 861.4596  | 4.1  | 55    | 63  | 0  | 30.4  | 30 | A | TSAIGPGFL                   | T | 1.0   | 6.02 |               |
| 334 | Cg2680    | 1 | 726.3225  | -1.7 | 9     | 14  | 0  | 25.3  | 24 | N | FDGEFI                      | E | 0.5   | 3    |               |
| 334 | Cg2680    | 1 | 729.3909  | -2.3 | 436   | 442 | 0  | 33.4  | 31 | A | LLDAVEA                     | A | 1.2   | 3    |               |
| 337 | Cg2571    | 2 | 1205.6656 | 1.5  | 250   | 260 | 0  | 27.2  | 27 | T | HELLEIGIVSP                 | T | 0.7   | 4.24 |               |
| 338 | Cg2419    | 1 | 1263.6711 | -2.2 | 503   | 513 | 0  | 37.7  | 28 | T | FVQVLKDLSES                 | - | 0.3   | 4.08 |               |
| 340 | Cg2799    | 1 | 804.3865  | -0.7 | 181   | 188 | 0  | 32.5  | 29 | A | DSSVVDI                     | R | 0.8   | 2.92 |               |
| 340 | Cg2799    | 2 | 1565.8665 | -0.4 | 104   | 117 | 0  | 35.4  | 26 | T | QIEDGNLVVEIKPL              | N | 0.1   | 3.82 |               |
| 340 | Cg2799    | 2 | 2359.1907 | -1.9 | 220   | 241 | 0  | 51.1  | 30 | R | VLQDGKDVVEGNISDWITTVLAS     | - | 0.1   | 3.5  |               |
| 340 | Cg2799    | 2 | 2772.393  | -1.0 | 213   | 238 | 0  | 34.3  | 31 | T | GSLSSPRVLQDGKDVVEGNISDWITTV | L | -0.3  | 3.96 |               |
| 341 | Cg0331    | 1 | 583.4309  | -0.2 | 184   | 188 | 0  | 24.1  | 18 | Q | ILILI                       | G | 4.2   | 6.02 |               |
| 341 | Cg0331    | 2 | 1009.6535 | 0.6  | 181   | 189 | 0  | 26.3  | 21 | G | QIQILILIG                   | T | 2.0   | 6.02 |               |
| 342 | Cg0886    | 1 | 882.5062  | -1.2 | 469   | 476 | 0  | 29.6  | 24 | D | IPEIADLI                    | S | 1.3   | 3    |               |
| 347 | Cg0568    | 1 | 509.3213  | 0.6  | 328   | 332 | 0  | 31.2  | 21 | V | LPPLA                       | I | 1.2   | 6.02 |               |
| 347 | Cg0568    | 1 | 666.468   | 0.3  | 359   | 364 | 0  | 19.9  | 19 | I | IPVLLL                      | R | 3.1   | 6.02 |               |
| 347 | Cg0568    | 1 | 955.6106  | -1.5 | 385   | 392 | 0  | 30.4  | 22 | H | PIFQILLI                    | V | 2.4   | 6.02 |               |
| 348 | Cg2424    | 1 | 657.3196  | 0.6  | 86    | 90  | 0  | 24.1  | 20 | A | MFIFT                       | R | 2.3   | 6.02 |               |
| 348 | Cg2424    | 1 | 674.4367  | 1.5  | 61    | 66  | 0  | 25.0  | 24 | L | FLIGLI                      | W | 3.2   | 6.02 |               |
| 348 | Cg2424    | 1 | 793.5677  | 0.0  | 45    | 51  | 0  | 25.6  | 13 | A | LIPLLLL                     | A | 3.1   | 6.02 |               |
| 348 | Cg2424    | 1 | 864.6048  | -0.9 | 47    | 54  | 0  | 20.8  | 13 | I | PLLLLAIL                    | G | 3.0   | 6.02 |               |
| 348 | Cg2424    | 2 | 1976.0149 | -1.3 | 221   | 241 | 0  | 34.4  | 30 | A | MDNVGNAPGGSLPKGPLPKGA       | S | -0.5  | 9.88 |               |
| 349 | Cg1289    | 1 | 571.3403  | 0.5  | 301   | 305 | 0  | 23.2  | 21 | G | LMLVP                       | M | 2.4   | 6.02 |               |
| 349 | Cg1289    | 1 | 793.5677  | 0.0  | 357   | 363 | 0  | 25.6  | 13 | W | LLIPIIL                     | F | 3.3   | 6.02 |               |
| 351 | Cg2916    | 1 | 726.3258  | -2.8 | 371   | 376 | 0  | 25.1  | 25 | D | YVDAML                      | K | 1.2   | 3.1  | Oxidation (M) |
| 353 | Cg0522    | 1 | 674.4367  | 1.5  | 23    | 28  | 0  | 25.0  | 24 | P | LFLGIL                      | A | 3.1   | 6.02 |               |
| 354 | Cg3169    | 1 | 598.4418  | 1.7  | 253   | 257 | 0  | 28.1  | 17 | L | ILKLI                       | N | 2.5   | 10.1 |               |
| 355 | Cg0470    | 1 | 642.3952  | 1.2  | 287   | 292 | 0  | 43.8  | 27 | G | DILGIL                      | G | 2.1   | 3.1  |               |
| 355 | Cg0470    | 1 | 699.4167  | 1.1  | 287   | 293 | 0  | 41.6  | 30 | G | DILGILG                     | I | 1.8   | 3.1  |               |
| 355 | Cg0470    | 1 | 782.5266  | 1.3  | 291   | 298 | 0  | 31.2  | 25 | G | ILGILAAL                    | G | 3.0   | 6.02 |               |
| 357 | Cg2370    | 1 | 632.3897  | -1.3 | 324   | 329 | 0  | 28.4  | 27 | A | LFAGLL                      | Y | 2.6   | 6.02 |               |

| hit | accession | z | mass      | ppm  | start | end | mc | score | id | - | sequence                        | + | gravy | pl    | modification |
|-----|-----------|---|-----------|------|-------|-----|----|-------|----|---|---------------------------------|---|-------|-------|--------------|
| 357 | Cg2370    | 1 | 973.5444  | 3.8  | 382   | 392 | 0  | 32.9  | 29 | S | AGGTSAITLA                      | S | 1.4   | 6.02  |              |
| 357 | Cg2370    | 1 | 1403.6866 | -2.0 | 490   | 503 | 0  | 30.0  | 29 | T | GSVKGRSSGQDNDR                  | S | -1.7  | 11.32 |              |
| 358 | Cg3068    | 1 | 1391.6973 | -2.4 | 238   | 250 | 0  | 47.8  | 29 | K | LGLADDALPFDFV                   | F | 0.9   | 2.82  |              |
| 358 | Cg3068    | 2 | 1717.8345 | 1.0  | 2     | 16  | 0  | 67.3  | 29 | M | PIATPEVYNEMLDRA                 | K | -0.4  | 3.82  |              |
| 358 | Cg3068    | 2 | 2622.2788 | -4.0 | 2     | 25  | 0  | 33.9  | 30 | M | PIATPEVYNEMLDRAKEGGFAFPA        | I | -0.3  | 4.16  |              |
| 359 | Cg1577    | 1 | 790.4225  | 1.3  | 141   | 147 | 0  | 34.6  | 31 | T | DIFVQLG                         | K | 1.1   | 3.1   |              |
| 359 | Cg1577    | 2 | 1252.4997 | 0.6  | 116   | 126 | 0  | 31.4  | 20 | I | NSDGFHFSDEV                     | R | -0.9  | 3.7   |              |
| 361 | Cg1365    | 1 | 1314.7031 | -3.7 | 79    | 90  | 0  | 55.1  | 30 | S | VLEVLKDAAEQT                    | W | 0.1   | 3.82  |              |
| 361 | Cg1365    | 2 | 2372.2336 | -2.3 | 31    | 52  | 0  | 30.9  | 30 | A | QAGTELFDVVDILDGDRALRVA          | V | 0.2   | 3.76  |              |
| 362 | Cg1121    | 2 | 3439.6181 | -1.9 | 24    | 54  | 0  | 48.9  | 28 | S | SLKETQRPQQQNPYGGYDNFGGVYQQNVAPQ | K | -1.4  | 6.84  |              |
| 363 | Cg2618    | 1 | 674.4367  | 1.5  | 21    | 26  | 0  | 24.6  | 24 | V | FIAVLL                          | N | 3.5   | 6.02  |              |
| 363 | Cg2618    | 1 | 984.4957  | -2.1 | 190   | 197 | 0  | 32.1  | 25 | T | FFFLPESV                        | D | 1.3   | 3.3   |              |
| 364 | Cg1479    | 1 | 598.4418  | 1.7  | 573   | 577 | 0  | 28.1  | 17 | A | IIKLI                           | N | 2.7   | 10.1  |              |
| 364 | Cg1479    | 1 | 656.3745  | 1.2  | 589   | 594 | 0  | 26.2  | 26 | P | EVSPLL                          | K | 1.0   | 3.3   |              |
| 364 | Cg1479    | 1 | 755.3701  | -0.4 | 587   | 593 | 0  | 30.6  | 22 | N | DPEVSPL                         | L | -0.4  | 3     |              |
| 369 | Cg2371    | 1 | 818.4386  | 0.4  | 84    | 91  | 0  | 30.7  | 27 | P | TSTLLVDA                        | H | 1.0   | 3.1   |              |
| 371 | Cg1483    | 1 | 640.4523  | 0.3  | 10    | 15  | 0  | 30.8  | 25 | L | IIGLLL                          | G | 3.3   | 6.02  |              |
| 371 | Cg1483    | 1 | 640.4523  | -0.9 | 9     | 14  | 0  | 28.6  | 25 | G | LIIGLL                          | L | 3.3   | 6.02  |              |
| 371 | Cg1483    | 2 | 915.4848  | -2.5 | 16    | 26  | 0  | 33.8  | 27 | L | GMLGGGGAILA                     | I | 1.4   | 6.02  |              |
| 374 | Cg3248    | 1 | 557.3247  | 0.2  | 146   | 150 | 0  | 23.0  | 19 | F | MVPIV                           | P | 2.6   | 6.02  |              |
| 375 | Cg1726    | 1 | 991.4287  | -1.8 | 385   | 393 | 0  | 28.6  | 25 | A | GGSYFVESF                       | T | 0.3   | 3.3   |              |
| 377 | Cg1673    | 1 | 684.4422  | 0.7  | 493   | 498 | 0  | 39.6  | 25 | Y | VELLLV                          | I | 2.7   | 3.3   |              |
| 377 | Cg1673    | 2 | 715.448   | 1.7  | 204   | 210 | 0  | 29.4  | 25 | A | IITASVI                         | A | 2.6   | 6.02  |              |
| 378 | Cg2147    | 1 | 621.356   | 0.8  | 132   | 136 | 0  | 26.1  | 19 | G | MFIVL                           | G | 3.4   | 6.02  |              |
| 380 | Cg3157    | 1 | 1430.7253 | -2.7 | 205   | 218 | 0  | 63.9  | 29 | A | AISQDTIDKLAEGA                  | G | -0.1  | 3.7   |              |
| 381 | Cg1654    | 2 | 1085.5465 | 1.0  | 723   | 732 | 0  | 38.9  | 27 | A | LENAGAEQRV                      | D | -0.7  | 4.26  |              |
| 382 | Cg1086    | 1 | 635.3716  | -4.9 | 171   | 175 | 0  | 24.1  | 19 | A | MLLFL                           | N | 3.2   | 6.02  |              |
| 382 | Cg1086    | 1 | 704.4473  | 0.6  | 81    | 86  | 0  | 22.7  | 22 | S | VITIFL                          | A | 3.2   | 6.02  |              |
| 386 | Cg1880    | 2 | 1135.5258 | -1.8 | 201   | 210 | 0  | 28.6  | 26 | T | AYDNVNPRTS                      | E | -1.3  | 6.7   |              |
| 386 | Cg1880    | 2 | 1270.671  | -0.2 | 565   | 575 | 0  | 38.7  | 29 | A | LFGSIERFFGV                     | L | 1.0   | 6.98  |              |
| 387 | Cg0915    | 2 | 2827.5232 | -0.7 | 129   | 153 | 0  | 46.9  | 30 | A | AFHVRLEDPLAVEILDVPRDLPQVS       | N | 0.2   | 4.2   |              |
| 388 | Cg1090    | 2 | 1354.5637 | -0.5 | 157   | 169 | 0  | 39.2  | 22 | A | NSAEDLSHDPEAA                   | A | -1.1  | 3.58  |              |
| 394 | Cg2267    | 1 | 699.4167  | 0.3  | 150   | 156 | 0  | 31.8  | 30 | E | GEIVLLG                         | H | 1.7   | 3.3   |              |
| 395 | Cg3413    | 1 | 617.4152  | -0.5 | 214   | 218 | 0  | 25.8  | 21 | Y | FLILL                           | L | 3.7   | 6.02  |              |
| 395 | Cg3413    | 1 | 667.3945  | -0.7 | 213   | 217 | 0  | 23.2  | 15 | T | YFLIL                           | L | 2.7   | 5.92  |              |
| 395 | Cg3413    | 1 | 730.4993  | 0.0  | 214   | 219 | 0  | 22.2  | 16 | Y | FLILLL                          | R | 3.8   | 6.02  |              |
| 396 | Cg1526    | 1 | 850.5892  | -0.1 | 346   | 353 | 0  | 26.3  | 16 | I | ALILPIVL                        | V | 3.1   | 6.02  |              |
| 398 | Cg1665    | 1 | 968.4815  | -0.2 | 165   | 174 | 0  | 43.4  | 25 | A | VGLPTGPEEA                      | T | -0.2  | 3.12  |              |
| 398 | Cg1665    | 1 | 1039.5186 | -0.6 | 164   | 174 | 0  | 36.5  | 25 | A | AVGLPTGPEEA                     | T | 0.0   | 3.12  |              |
| 398 | Cg1665    | 1 | 1833.8269 | -4.5 | 112   | 129 | 0  | 57.5  | 25 | A | GFSTPESVEEGPNGESLV              | T | -0.6  | 2.96  |              |

| hit | accession | z | mass      | ppm  | start | end | mc | score | id | - | sequence                  | + | gravy | pl   | modification  |
|-----|-----------|---|-----------|------|-------|-----|----|-------|----|---|---------------------------|---|-------|------|---------------|
| 399 | Cg1690    | 1 | 642.3952  | 1.2  | 348   | 353 | 0  | 43.8  | 27 | G | EVLGLL                    | E | 2.0   | 3.3  |               |
| 400 | Cg0437    | 1 | 690.3952  | 0.7  | 278   | 283 | 0  | 26.1  | 26 | E | FIDLAL                    | T | 2.2   | 3.1  |               |
| 403 | Cg0565    | 1 | 758.4174  | -0.9 | 150   | 157 | 0  | 34.2  | 32 | A | ISGGIEAL                  | C | 1.2   | 3.3  |               |
| 404 | Cg3242    | 1 | 782.5266  | 1.3  | 421   | 428 | 0  | 32.7  | 25 | S | VLALILAA                  | F | 3.2   | 6.02 |               |
| 406 | Cg1959    | 1 | 551.3683  | 0.9  | 557   | 561 | 0  | 34.3  | 18 | G | LPLPL                     | K | 1.6   | 6.02 |               |
| 407 | Cg2695    | 2 | 926.5185  | -1.0 | 352   | 361 | 0  | 26.4  | 26 | G | VIGPNGVGKS                | T | 0.2   | 10.1 |               |
| 407 | Cg2695    | 2 | 2240.9817 | -1.0 | 113   | 132 | 0  | 26.8  | 23 | T | NYTDELMEEMGVLQEALDAA      | D | -0.3  | 2.76 |               |
| 408 | Cg0552    | 1 | 686.4214  | 0.7  | 35    | 40  | 0  | 33.7  | 26 | P | LSLELL                    | A | 1.8   | 3.3  |               |
| 409 | Cg2008    | 1 | 579.338   | 2.6  | 72    | 76  | 0  | 22.2  | 21 | M | LLPTH                     | D | 0.4   | 7.84 |               |
| 410 | Cg1229    | 1 | 1241.6252 | -2.3 | 118   | 129 | 0  | 28.4  | 27 | A | RIDPTDLGDGLA              | Q | -0.4  | 3.6  |               |
| 410 | Cg1229    | 2 | 1595.8519 | 0.2  | 118   | 132 | 0  | 36.6  | 28 | A | RIDPTDLGDGLAQLL           | K | 0.0   | 3.6  |               |
| 410 | Cg1229    | 2 | 2124.1943 | -2.6 | 123   | 142 | 0  | 32.8  | 27 | T | DLGDGLAQLLKLPERFVIGA      | V | 0.4   | 4.3  |               |
| 410 | Cg1229    | 3 | 2706.5068 | -1.4 | 118   | 142 | 0  | 31.9  | 27 | A | RIDPTDLGDGLAQLLKLPERFVIGA | V | 0.1   | 4.46 |               |
| 413 | Cg2833    | 1 | 830.4538  | 1.2  | 227   | 233 | 0  | 31.5  | 27 | A | NFIPEVL                   | D | 1.0   | 3.3  |               |
| 416 | Cg0781    | 1 | 1524.6741 | -3.5 | 144   | 157 | 0  | 28.4  | 25 | A | SMYAQPFANTPAPM            | Y | -0.2  | 5.92 |               |
| 416 | Cg0781    | 2 | 2625.2558 | -3.7 | 2     | 25  | 0  | 41.1  | 29 | M | NTNLPNLYTAFDLDRSESSEALGV  | S | -0.4  | 3.58 |               |
| 418 | Cg2301    | 1 | 584.3897  | 1.5  | 369   | 374 | 0  | 31.7  | 31 | F | LLGIVA                    | A | 3.0   | 6.02 |               |
| 418 | Cg2301    | 1 | 678.3775  | -0.1 | 149   | 154 | 0  | 23.2  | 23 | G | MLGVFI                    | G | 2.8   | 6.02 |               |
| 419 | Cg1305    | 1 | 711.4894  | -1.3 | 253   | 259 | 0  | 30.7  | 25 | G | AILVILA                   | L | 3.5   | 6.02 |               |
| 419 | Cg1305    | 2 | 1009.6536 | 1.6  | 345   | 354 | 0  | 23.8  | 21 | V | LIVGVILNAV                | L | 2.7   | 6.02 |               |
| 420 | Cg1672    | 1 | 553.3839  | 1.1  | 11    | 15  | 0  | 26.4  | 24 | T | LVIIIP                    | T | 3.1   | 6.02 |               |
| 420 | Cg1672    | 2 | 1444.643  | -2.4 | 41    | 54  | 0  | 83.8  | 24 | L | IVDDNSPDGTGERA            | D | -1.1  | 3.5  |               |
| 421 | Cg2166    | 1 | 654.4064  | -0.5 | 506   | 512 | 0  | 23.1  | 23 | N | AGVPLKA                   | P | 0.8   | 10.1 |               |
| 421 | Cg2166    | 1 | 704.4109  | 1.4  | 196   | 201 | 0  | 24.8  | 23 | S | VFEIVV                    | A | 2.7   | 3.3  |               |
| 421 | Cg2166    | 2 | 715.448   | 1.5  | 403   | 409 | 0  | 28.5  | 25 | Q | ILGVTTL                   | D | 2.1   | 6.02 |               |
| 422 | Cg1546    | 1 | 553.3839  | 1.3  | 111   | 115 | 0  | 24.5  | 24 | T | IIVIP                     | G | 3.2   | 6.02 |               |
| 422 | Cg1546    | 1 | 686.4214  | 1.6  | 208   | 213 | 0  | 22.8  | 21 | S | LVTELL                    | E | 1.9   | 3.3  |               |
| 423 | Cg0396    | 1 | 640.416   | 2.0  | 237   | 242 | 0  | 31.4  | 23 | L | LSVLPL                    | P | 2.2   | 6.02 |               |
| 423 | Cg0396    | 1 | 1054.679  | -1.8 | 245   | 253 | 0  | 21.7  | 21 | L | LFVLIPQIL                 | G | 2.5   | 6.02 |               |
| 424 | Cg0808    | 1 | 758.4327  | 1.3  | 342   | 348 | 0  | 31.1  | 27 | P | SIWLGLIA                  | V | 1.8   | 6.02 |               |
| 425 | Cg0375    | 1 | 826.4953  | 0.0  | 422   | 429 | 0  | 35.9  | 27 | A | IFGAPLPL                  | S | 1.6   | 6.02 |               |
| 426 | Cg0887    | 2 | 715.448   | 1.5  | 111   | 117 | 0  | 28.5  | 25 | I | LLVGTTL                   | S | 2.0   | 6.02 |               |
| 427 | Cg2109    | 1 | 698.4578  | 1.0  | 196   | 201 | 0  | 28.2  | 22 | D | LDLLLL                    | D | 2.6   | 3.1  |               |
| 428 | Cg0318    | 1 | 639.3302  | -4.5 | 342   | 346 | 0  | 25.2  | 23 | L | VYVML                     | W | 2.6   | 5.92 | Oxidation (M) |
| 430 | Cg2470    | 1 | 843.361   | -3.4 | 286   | 293 | 0  | 25.9  | 23 | I | LQDGEDPA                  | T | -1.3  | 2.88 |               |
| 430 | Cg2470    | 2 | 2172.0698 | -1.0 | 305   | 323 | 0  | 57.5  | 30 | T | YVINEDAAERQGVEIPQEI       | L | -0.5  | 3.58 |               |
| 431 | Cg2891    | 1 | 585.3737  | 1.5  | 267   | 271 | 0  | 27.8  | 25 | A | DLLIL                     | L | 2.5   | 3.1  |               |
| 431 | Cg2891    | 1 | 698.4578  | 1.0  | 267   | 272 | 0  | 28.2  | 22 | A | DLLILL                    | G | 2.7   | 3.1  |               |
| 432 | Cg0469    | 1 | 642.3952  | 1.2  | 30    | 35  | 0  | 43.8  | 27 | G | EVLGLI                    | G | 2.1   | 3.3  |               |
| 432 | Cg0469    | 1 | 699.4167  | 1.1  | 30    | 36  | 0  | 41.6  | 30 | G | EVLGLIG                   | P | 1.7   | 3.3  |               |

| hit | accession | z | mass      | ppm  | start | end | mc | score | id | - | sequence         | + | gravy | pl   | modification |
|-----|-----------|---|-----------|------|-------|-----|----|-------|----|---|------------------|---|-------|------|--------------|
| 435 | Cg2557    | 1 | 836.5735  | -0.5 | 173   | 180 | 0  | 26.5  | 18 | V | LLPVIIGL         | V | 2.8   | 6.02 |              |
| 437 | Cg2777    | 1 | 545.3247  | 2.0  | 146   | 150 | 0  | 29.9  | 28 | L | MIVLA            | F | 3.2   | 6.02 |              |
| 437 | Cg2777    | 1 | 582.3741  | 0.7  | 207   | 212 | 0  | 28.1  | 27 | L | IPGIIA           | A | 2.2   | 6.02 |              |
| 437 | Cg2777    | 1 | 680.4836  | 2.2  | 203   | 208 | 0  | 23.9  | 15 | M | ILLIIP           | G | 3.1   | 6.02 |              |
| 438 | Cg0327    | 1 | 779.552   | -0.3 | 18    | 24  | 0  | 16.1  | 13 | A | LLLLVPL          | I | 3.1   | 6.02 |              |
| 438 | Cg0327    | 1 | 963.6732  | -1.1 | 18    | 26  | 0  | 16.8  | 13 | A | LLLLVPLIA        | G | 3.1   | 6.02 |              |
| 438 | Cg0327    | 2 | 1277.5735 | -3.1 | 292   | 303 | 0  | 45.5  | 25 | A | GTIEGTAEERT      | S | -1.3  | 3.68 |              |
| 439 | Cg0088    | 1 | 489.2587  | 0.2  | 262   | 266 | 0  | 31.3  | 29 | K | GFPGL            | G | 0.8   | 6.02 |              |
| 439 | Cg0088    | 1 | 850.5892  | -0.1 | 479   | 486 | 0  | 33.4  | 16 | P | LVPAILLL         | V | 3.0   | 6.02 |              |
| 441 | Cg1341    | 1 | 640.4523  | 0.3  | 106   | 111 | 0  | 30.8  | 25 | G | LIGLII           | R | 3.5   | 6.02 |              |
| 442 | Cg3322    | 1 | 527.3319  | 0.0  | 69    | 73  | 0  | 28.1  | 27 | S | LTVPV            | A | 2.0   | 6.02 |              |
| 445 | Cg1774    | 2 | 1626.8617 | -0.1 | 391   | 406 | 0  | 47.5  | 29 | A | LGKTLPELWGGSadLA | G | 0.2   | 4.08 |              |
| 447 | Cg0623    | 1 | 836.4102  | -3.7 | 326   | 332 | 0  | 27.4  | 27 | G | SMITTWV          | P | 1.1   | 6.02 |              |
| 449 | Cg1737    | 1 | 545.3247  | 2.0  | 597   | 601 | 0  | 29.9  | 28 | P | IMVIA            | Y | 3.4   | 6.02 |              |
| 451 | Cg3027    | 1 | 775.4844  | 0.0  | 13    | 19  | 0  | 25.1  | 23 | V | FIIGLTL          | M | 2.6   | 6.02 |              |
| 451 | Cg3027    | 1 | 981.6263  | -1.9 | 43    | 51  | 0  | 31.8  | 22 | A | IVLFLPLPA        | M | 2.4   | 6.02 |              |
| 452 | Cg3227    | 1 | 746.3884  | 1.9  | 11    | 16  | 0  | 35.8  | 28 | A | ELLELM           | K | 1.1   | 3.12 |              |
| 452 | Cg3227    | 1 | 1451.7079 | -2.6 | 109   | 121 | 0  | 29.9  | 28 | T | GFTRLMQTEGEIA    | G | -0.2  | 4.26 |              |
| 452 | Cg3227    | 2 | 1593.796  | 0.7  | 252   | 265 | 0  | 42.0  | 29 | S | AMDPTISYEDLKVI   | R | 0.1   | 3.7  |              |
| 456 | Cg1411    | 1 | 678.3775  | -0.1 | 203   | 208 | 0  | 23.2  | 23 | G | VAMVFI           | S | 3.2   | 6.02 |              |
| 457 | Cg2154    | 1 | 601.3873  | 0.3  | 71    | 75  | 0  | 27.5  | 16 | F | ILLMI            | T | 3.7   | 6.02 |              |
| 457 | Cg2154    | 1 | 675.3956  | 0.7  | 113   | 118 | 0  | 39.7  | 28 | C | FNIIGI           | L | 2.1   | 6.02 |              |
| 457 | Cg2154    | 1 | 1344.7289 | -2.1 | 88    | 100 | 0  | 44.7  | 28 | R | GLVTDGFKIADPI    | A | 0.6   | 3.88 |              |
| 457 | Cg2154    | 1 | 1500.83   | -2.6 | 87    | 100 | 0  | 29.9  | 28 | A | RGLVTDGFKIADPI   | A | 0.2   | 6.9  |              |
| 462 | Cg1451    | 1 | 990.5022  | -2.1 | 306   | 315 | 0  | 43.1  | 29 | A | LAGEFVADAV       | N | 1.3   | 3    |              |
| 463 | Cg1020    | 1 | 757.4222  | 0.4  | 25    | 31  | 0  | 31.4  | 29 | L | TPILDLSL         | P | 0.8   | 3.1  |              |
| 463 | Cg1020    | 1 | 870.5062  | 0.2  | 24    | 31  | 0  | 44.5  | 27 | S | LTPILDLSL        | P | 1.2   | 3.1  |              |
| 464 | Cg1245    | 1 | 577.3475  | 2.3  | 330   | 334 | 0  | 28.1  | 28 | G | YIGLL            | L | 2.1   | 5.92 |              |
| 464 | Cg1245    | 1 | 617.4152  | -0.5 | 229   | 233 | 0  | 25.8  | 21 | G | FLIII            | S | 4.0   | 6.02 |              |
| 465 | Cg3153    | 1 | 793.5677  | 0.0  | 350   | 356 | 0  | 15.2  | 13 | A | LPLLLLL          | S | 3.0   | 6.02 |              |
| 466 | Cg2673    | 1 | 751.5207  | 0.9  | 80    | 86  | 0  | 20.0  | 17 | T | LPLALLL          | L | 2.7   | 6.02 |              |
| 467 | Cg0755    | 2 | 1350.7871 | 3.0  | 198   | 210 | 0  | 22.6  | 22 | A | ALVRPLELGADVV    | V | 1.1   | 4.08 |              |
| 468 | Cg0997    | 1 | 583.4309  | -0.2 | 172   | 176 | 0  | 24.1  | 18 | V | ILLII            | G | 4.2   | 6.02 |              |
| 469 | Cg0018    | 1 | 640.4523  | 0.3  | 55    | 60  | 0  | 30.8  | 25 | I | ILGIIL           | T | 3.5   | 6.02 |              |
| 469 | Cg0018    | 1 | 850.5892  | -0.1 | 49    | 56  | 0  | 22.2  | 16 | S | PLIVAIL          | G | 3.2   | 6.02 |              |
| 469 | Cg0018    | 1 | 876.4779  | -0.3 | 98    | 105 | 0  | 29.5  | 28 | D | ILSLGFPM         | L | 1.8   | 6.02 |              |
| 470 | Cg2314    | 1 | 713.4323  | 2.0  | 119   | 125 | 0  | 34.3  | 27 | C | EAVILLG          | S | 2.0   | 3.3  |              |
| 471 | Cg2139    | 1 | 666.468   | 0.3  | 118   | 123 | 0  | 19.9  | 19 | A | IPVLIL           | M | 3.2   | 6.02 |              |
| 471 | Cg2139    | 2 | 1339.662  | 0.4  | 282   | 293 | 0  | 36.0  | 27 | A | KVPEQPDQGLLET    | K | -1.5  | 3.82 |              |
| 476 | Cg0926    | 1 | 553.3839  | 1.3  | 150   | 154 | 0  | 24.5  | 24 | S | LIVPI            | I | 3.1   | 6.02 |              |



| hit | accession | z | mass      | ppm  | start | end | mc | score | id | - | sequence           | + | gravy | pl    | modification |
|-----|-----------|---|-----------|------|-------|-----|----|-------|----|---|--------------------|---|-------|-------|--------------|
| 476 | Cg0926    | 1 | 836.5735  | -0.5 | 150   | 157 | 0  | 26.7  | 18 | S | LIVPIIGI           | M | 3.0   | 6.02  |              |
| 478 | Cg2610    | 1 | 622.4054  | -0.6 | 488   | 493 | 0  | 27.8  | 17 | D | LPAIPL             | W | 1.8   | 6.02  |              |
| 481 | Cg2206    | 1 | 869.5222  | -0.3 | 11    | 19  | 0  | 29.7  | 27 | N | LSTPIGLGL          | P | 1.3   | 6.02  |              |
| 482 | Cg0480    | 1 | 509.3213  | 0.4  | 168   | 172 | 0  | 21.3  | 21 | R | LPIPA              | L | 1.4   | 6.02  |              |
| 482 | Cg0480    | 2 | 1898.0109 | 0.4  | 134   | 150 | 0  | 29.1  | 29 | A | SPTVEQLRGQTQLETIV  | S | -0.4  | 4.26  |              |
| 483 | Cg0370    | 1 | 656.3931  | -4.4 | 695   | 700 | 0  | 25.4  | 20 | G | MLPLLA             | T | 2.3   | 6.02  |              |
| 487 | Cg2001    | 1 | 997.5808  | 0.5  | 326   | 334 | 0  | 33.1  | 26 | T | DVLIPSKNL          | A | 0.3   | 6.76  |              |
| 491 | Cg2151    | 1 | 1028.5866 | -2.0 | 153   | 161 | 0  | 28.5  | 28 | T | KLLSQLEQA          | K | -0.2  | 6.94  |              |
| 491 | Cg2151    | 2 | 1142.5567 | -1.1 | 245   | 255 | 0  | 28.6  | 27 | A | GNKQESIEAPA        | A | -1.1  | 4.26  |              |
| 491 | Cg2151    | 2 | 1213.5938 | -2.3 | 244   | 255 | 0  | 30.7  | 26 | T | AGNKQESIEAPA       | A | -0.9  | 4.26  |              |
| 491 | Cg2151    | 2 | 1505.678  | -1.6 | 207   | 220 | 0  | 50.0  | 26 | A | SNSVEGRMAEVEQA     | G | -0.7  | 3.96  |              |
| 491 | Cg2151    | 2 | 2066.9869 | -1.0 | 113   | 130 | 0  | 41.1  | 29 | A | EQSVEDTKQLHDQALQQA | D | -1.4  | 4.06  |              |
| 493 | Cg0195    | 2 | 1422.7467 | 0.6  | 302   | 314 | 0  | 41.5  | 28 | V | GAEVPESRIPQI       | E | -0.6  | 4.26  |              |
| 495 | Cg0893    | 1 | 656.3745  | 0.9  | 98    | 103 | 0  | 26.5  | 26 | D | DTIVPI             | E | 1.2   | 3.1   |              |
| 495 | Cg0893    | 1 | 936.4699  | 4.6  | 75    | 83  | 0  | 30.9  | 27 | N | MTTVSVRSG          | M | 0.3   | 11.04 |              |
| 497 | Cg2291    | 2 | 1425.6049 | 4.1  | 80    | 92  | 0  | 23.8  | 23 | R | FTDGATVWENGET      | I | -0.7  | 2.94  |              |
| 497 | Cg2291    | 1 | 1659.8138 | -3.1 | 19    | 34  | 0  | 42.4  | 29 | A | SADGILRLVEDGMDVA   | R | 0.4   | 3.5   |              |
| 500 | Cg0735    | 1 | 617.4152  | -0.5 | 76    | 80  | 0  | 25.8  | 21 | P | FIILI              | A | 4.0   | 6.02  |              |
| 500 | Cg0735    | 1 | 688.4523  | 0.1  | 76    | 81  | 0  | 28.6  | 21 | P | FIILIA             | A | 3.7   | 6.02  |              |
| 500 | Cg0735    | 1 | 1082.7103 | -1.8 | 74    | 83  | 0  | 22.1  | 18 | P | IPFIIILIAI         | K | 3.1   | 6.02  |              |
| 502 | Cg1064    | 1 | 553.3839  | 1.1  | 335   | 339 | 0  | 26.4  | 24 | V | IVLLP              | G | 2.9   | 6.02  |              |
| 502 | Cg1064    | 1 | 670.3149  | 1.5  | 186   | 191 | 0  | 39.8  | 23 | S | FMGFAV             | Y | 2.2   | 6.02  |              |
| 506 | Cg0688    | 1 | 699.4167  | 0.6  | 83    | 89  | 0  | 42.6  | 30 | H | VDALLLG            | N | 1.9   | 3.1   |              |
| 507 | Cg2412    | 1 | 705.352   | -1.1 | 173   | 178 | 0  | 40.3  | 30 | S | NFVMPV             | A | 1.3   | 6.02  |              |
| 507 | Cg2412    | 1 | 747.4167  | -0.8 | 209   | 215 | 0  | 35.4  | 28 | L | GFLIEGI            | T | 1.6   | 3.3   |              |
| 507 | Cg2412    | 1 | 794.5266  | -1.1 | 177   | 184 | 0  | 32.9  | 21 | M | PVAIALLV           | V | 2.8   | 6.02  |              |
| 508 | Cg0952    | 1 | 633.3486  | -0.6 | 68    | 73  | 0  | 28.9  | 28 | V | FGAINI             | G | 1.6   | 6.02  |              |
| 508 | Cg0952    | 1 | 698.3098  | -1.1 | 36    | 41  | 0  | 33.9  | 24 | R | SFAFPM             | T | 1.2   | 6.02  |              |
| 508 | Cg0952    | 2 | 1020.4876 | 0.7  | 24    | 32  | 0  | 43.7  | 29 | A | SPEFGELRS          | K | -0.9  | 4.26  |              |
| 508 | Cg0952    | 2 | 2093.9589 | -1.3 | 11    | 28  | 0  | 59.4  | 27 | R | RQPTAQEFRDQMASPEFG | E | -1.3  | 4.44  |              |
| 512 | Cg0340    | 1 | 601.3873  | 0.3  | 132   | 136 | 0  | 27.5  | 16 | V | ILIML              | R | 3.7   | 6.02  |              |
| 513 | Cg1350    | 1 | 698.4578  | 1.0  | 29    | 34  | 0  | 23.2  | 22 | T | LLDILL             | S | 2.7   | 3.1   |              |
| 513 | Cg1350    | 1 | 715.4302  | 1.0  | 1     | 6   | 0  | 39.8  | 27 | - | MNIIL              | A | 2.6   | 6.02  |              |
| 513 | Cg1350    | 1 | 924.4076  | 0.3  | 168   | 175 | 0  | 29.2  | 26 | K | DYDTVAEL           | E | -0.3  | 2.88  |              |
| 517 | Cg2558    | 1 | 675.3956  | 0.7  | 55    | 61  | 0  | 39.7  | 28 | W | FGLLGL             | D | 1.9   | 6.02  |              |
| 517 | Cg2558    | 1 | 1425.7656 | -2.4 | 51    | 64  | 0  | 34.1  | 28 | I | IAPWFGLLGLDPA      | H | 1.0   | 3.1   |              |
| 518 | Cg1115    | 1 | 642.3952  | 1.2  | 305   | 310 | 0  | 27.2  | 27 | D | ILDGLI             | L | 2.1   | 3.1   |              |
| 518 | Cg1115    | 1 | 699.4167  | 0.6  | 306   | 312 | 0  | 42.6  | 30 | I | LDGLILG            | L | 1.7   | 3.1   |              |
| 519 | Cg2598    | 1 | 898.5528  | -0.8 | 49    | 56  | 0  | 39.6  | 27 | A | SILIPFPI           | S | 2.0   | 6.02  |              |
| 522 | Cg0083    | 1 | 635.3716  | -4.9 | 80    | 84  | 0  | 19.7  | 19 | Q | IMFII              | V | 3.6   | 6.02  |              |

| hit | accession | z | mass      | ppm  | start | end | mc | score | id | - | sequence              | + | gravy | pl   | modification  |
|-----|-----------|---|-----------|------|-------|-----|----|-------|----|---|-----------------------|---|-------|------|---------------|
| 524 | Cg2292    | 1 | 957.5324  | 0.0  | 14    | 21  | 0  | 31.1  | 28 | V | WYLGPIPI              | R | 0.9   | 5.92 |               |
| 525 | Cg3017    | 2 | 1481.6787 | -0.5 | 252   | 264 | 0  | 37.2  | 27 | A | QYAENPDTFAQKA         | A | -1.3  | 4.08 |               |
| 531 | Cg1578    | 1 | 635.3683  | 0.5  | 170   | 174 | 0  | 24.1  | 19 | T | FPLFI                 | P | 2.5   | 6.02 |               |
| 532 | Cg1657    | 1 | 516.1816  | 2.5  | 53    | 57  | 0  | 16.8  | 16 | L | GNDPD                 | L | -2.5  | 2.92 |               |
| 532 | Cg1657    | 1 | 615.338   | 1.3  | 73    | 78  | 0  | 28.0  | 27 | S | GWLGLA                | E | 1.3   | 6.02 |               |
| 533 | Cg0769    | 1 | 553.3839  | 1.1  | 212   | 216 | 0  | 26.4  | 24 | V | VLIPL                 | L | 2.9   | 6.02 |               |
| 533 | Cg0769    | 1 | 640.416   | 1.6  | 210   | 215 | 0  | 29.5  | 23 | T | TVVLIP                | L | 2.4   | 6.02 |               |
| 533 | Cg0769    | 1 | 1137.7373 | 1.3  | 209   | 219 | 0  | 22.6  | 17 | V | TTVVLIPLLVA           | N | 2.5   | 6.02 |               |
| 535 | Cg2369    | 1 | 791.4582  | -1.4 | 120   | 126 | 0  | 25.9  | 25 | S | LGLPFFV               | H | 2.2   | 6.02 |               |
| 536 | Cg0249    | 1 | 738.3952  | 0.1  | 217   | 222 | 0  | 27.5  | 24 | L | FYVTPI                | V | 1.3   | 5.92 |               |
| 536 | Cg0249    | 1 | 1501.7816 | -3.3 | 244   | 255 | 0  | 39.9  | 29 | A | ELNPLYHYLEIV          | R | 0.2   | 4.24 |               |
| 537 | Cg1855    | 1 | 1028.4233 | -1.5 | 366   | 374 | 0  | 27.0  | 20 | T | DMSYGDRGL             | K | -1.0  | 3.88 | Oxidation (M) |
| 539 | Cg0262    | 1 | 656.3931  | -4.4 | 192   | 197 | 0  | 25.4  | 20 | K | MIPLA                 | M | 2.5   | 6.02 |               |
| 539 | Cg0262    | 1 | 1026.6477 | -0.2 | 35    | 43  | 0  | 23.6  | 23 | G | PIFALLLQI             | P | 2.2   | 6.02 |               |
| 541 | Cg0390    | 1 | 622.4054  | -0.6 | 89    | 94  | 0  | 17.6  | 17 | M | LPAPLI                | A | 1.8   | 6.02 |               |
| 541 | Cg0390    | 1 | 684.4422  | 0.7  | 57    | 62  | 0  | 39.6  | 25 | F | IDLLLV                | F | 2.8   | 3.1  |               |
| 542 | Cg2913    | 1 | 665.4112  | 0.3  | 244   | 250 | 0  | 22.8  | 20 | S | LAPGLPV               | S | 1.4   | 6.02 |               |
| 542 | Cg2913    | 1 | 937.4757  | -1.2 | 9     | 16  | 0  | 30.1  | 27 | S | DTQYLISV              | D | 0.3   | 3.1  |               |
| 542 | Cg2913    | 1 | 1475.9691 | -2.0 | 28    | 42  | 0  | 14.9  | 13 | A | LLGLLSGVIAPLIV        | R | 2.6   | 6.02 |               |
| 542 | Cg2913    | 1 | 1634.0382 | -1.7 | 26    | 42  | 0  | 38.1  | 15 | A | SALLGLLSGVIAPLIV      | R | 2.4   | 6.02 |               |
| 543 | Cg2559    | 1 | 882.5062  | 0.0  | 242   | 249 | 0  | 29.1  | 24 | F | LDPEAILL              | E | 1.1   | 3    |               |
| 544 | Cg2289    | 1 | 906.5651  | -1.3 | 20    | 27  | 0  | 19.2  | 18 | P | LVKLAHNL              | R | 0.9   | 10.1 |               |
| 552 | Cg2390    | 1 | 642.3952  | 1.2  | 33    | 38  | 0  | 43.8  | 27 | K | DLLGLL                | S | 1.9   | 3.1  |               |
| 553 | Cg1569    | 1 | 553.3839  | 1.3  | 144   | 148 | 0  | 24.5  | 24 | G | IIVPL                 | A | 3.1   | 6.02 |               |
| 557 | Cg1109    | 2 | 1476.7208 | 0.9  | 60    | 72  | 0  | 29.7  | 29 | A | GVLEEGQYNRELA         | E | -0.8  | 3.96 |               |
| 557 | Cg1109    | 2 | 1617.7059 | 0.4  | 86    | 99  | 0  | 24.8  | 24 | T | QFPQIGDWNEQAA         | A | -1.2  | 2.88 |               |
| 557 | Cg1109    | 1 | 1860.9217 | -3.5 | 59    | 75  | 0  | 34.5  | 30 | A | AGVLEEGQYNRELAELAEI   | A | -0.3  | 3.8  |               |
| 557 | Cg1109    | 2 | 2524.1295 | -1.3 | 78    | 99  | 0  | 37.2  | 24 | A | KGEGFWTTQFPQIGDWNEQAA | A | -1.1  | 3.58 |               |
| 560 | Cg2487    | 1 | 582.3741  | 0.7  | 569   | 574 | 0  | 28.1  | 27 | S | PLGLLA                | E | 1.9   | 6.02 |               |
| 560 | Cg2487    | 1 | 773.4171  | 0.3  | 127   | 133 | 0  | 30.4  | 29 | E | VDVESIL               | R | 1.3   | 3    |               |
| 561 | Cg1353    | 2 | 800.4643  | 1.6  | 128   | 134 | 0  | 31.8  | 29 | Q | LGEILKE               | T | 0.1   | 4.26 |               |
| 563 | Cg1474    | 1 | 553.3839  | 1.1  | 266   | 270 | 0  | 26.4  | 24 | D | VLLPL                 | A | 2.8   | 6.02 |               |
| 563 | Cg1474    | 1 | 713.4323  | 2.0  | 292   | 298 | 0  | 34.3  | 27 | N | LADILLG               | N | 2.0   | 3.1  |               |
| 565 | Cg0824    | 1 | 836.3916  | -1.1 | 189   | 195 | 0  | 33.2  | 29 | I | YQILDDA               | T | -0.2  | 2.92 |               |
| 569 | Cg0701    | 1 | 632.3897  | -1.3 | 43    | 48  | 0  | 28.1  | 27 | L | FIAGLI                | M | 2.8   | 6.02 |               |
| 570 | Cg1643    | 1 | 642.3741  | -0.8 | 434   | 439 | 0  | 29.5  | 17 | L | PIPVFA                | S | 1.7   | 6.02 |               |
| 570 | Cg1643    | 1 | 773.4171  | 0.3  | 399   | 405 | 0  | 30.4  | 29 | N | AELESLL               | L | 0.8   | 3.12 |               |
| 572 | Cg0025    | 1 | 690.3952  | 0.7  | 250   | 255 | 0  | 26.1  | 26 | P | LFDIAL                | I | 2.2   | 3.1  |               |
| 573 | Cg1101    | 1 | 666.468   | 0.3  | 165   | 170 | 0  | 19.9  | 19 | S | IPVLII                | V | 3.3   | 6.02 |               |
| 574 | Cg3135    | 1 | 689.4112  | 0.7  | 22    | 28  | 0  | 27.5  | 27 | V | AFGGLLI               | A | 2.3   | 6.02 |               |

| hit | accession | z | mass      | ppm  | start | end | mc | score | id | - | sequence             | + | gravy | pl    | modification  |
|-----|-----------|---|-----------|------|-------|-----|----|-------|----|---|----------------------|---|-------|-------|---------------|
| 574 | Cg3135    | 1 | 802.4986  | -3.6 | 230   | 236 | 0  | 32.1  | 24 | D | KAIVMLI              | V | 2.4   | 10.1  | Oxidation (M) |
| 575 | Cg3237    | 1 | 766.2922  | 0.0  | 186   | 191 | 0  | 29.3  | 20 | V | FNWDDA               | A | -1.1  | 2.92  |               |
| 575 | Cg3237    | 1 | 1264.5513 | -1.3 | 182   | 191 | 0  | 56.9  | 24 | A | VWNVFNWDDA           | A | -0.3  | 2.92  |               |
| 575 | Cg3237    | 1 | 1281.6129 | -1.3 | 2     | 12  | 0  | 31.3  | 27 | M | AVYELPELDYA          | Y | 0.1   | 2.94  |               |
| 575 | Cg3237    | 1 | 1406.6255 | -1.5 | 182   | 193 | 0  | 36.7  | 25 | A | VWNVFNWDDAAA         | R | 0.1   | 2.92  |               |
| 575 | Cg3237    | 2 | 2168.0709 | -2.7 | 41    | 60  | 0  | 41.1  | 29 | A | NAALEALEKAREEGTNPDQI | R | -1.0  | 4     |               |
| 577 | Cg2577    | 1 | 598.4418  | 1.7  | 404   | 408 | 0  | 28.1  | 17 | P | LLKII                | E | 2.5   | 10.1  |               |
| 577 | Cg2577    | 1 | 656.3745  | -0.5 | 351   | 356 | 0  | 27.6  | 27 | A | DLVTIP               | I | 1.1   | 3.1   |               |
| 578 | Cg1274    | 1 | 698.4578  | 1.0  | 220   | 225 | 0  | 28.2  | 22 | D | LDILLL               | D | 2.7   | 3.1   |               |
| 579 | Cg0444    | 1 | 1230.6819 | 1.1  | 19    | 31  | 0  | 31.5  | 27 | D | LSQASLAATLGLS        | A | 1.0   | 6.02  |               |
| 580 | Cg0948    | 1 | 735.3803  | 1.1  | 362   | 368 | 0  | 41.0  | 30 | L | TGAIDFI              | L | 1.3   | 3.1   |               |
| 581 | Cg1609    | 1 | 917.4858  | 0.7  | 473   | 480 | 0  | 29.1  | 28 | L | VSALTEWL             | D | 1.0   | 3.3   |               |
| 583 | Cg0776    | 1 | 640.416   | 2.0  | 77    | 82  | 0  | 31.4  | 23 | A | SLVLPI               | T | 2.3   | 6.02  |               |
| 584 | Cg0042    | 1 | 577.3475  | 2.3  | 241   | 245 | 0  | 28.1  | 28 | I | YLGLL                | I | 1.9   | 5.92  |               |
| 585 | Cg1203    | 1 | 1015.5073 | -4.1 | 250   | 258 | 0  | 29.4  | 27 | L | ELDDEVAIL            | R | 0.5   | 2.84  |               |
| 585 | Cg1203    | 2 | 1213.6554 | -0.2 | 331   | 342 | 0  | 47.9  | 28 | L | EAAVEVLGGKIE         | F | 0.4   | 3.96  |               |
| 586 | Cg2524    | 1 | 577.3475  | 2.3  | 18    | 22  | 0  | 28.1  | 28 | Y | YLGII                | V | 2.2   | 5.92  |               |
| 588 | Cg0935    | 2 | 849.3769  | 0.5  | 24    | 30  | 0  | 27.1  | 23 | A | WPEHNPA              | D | -1.8  | 5.12  |               |
| 588 | Cg0935    | 2 | 1362.6092 | 0.1  | 46    | 57  | 0  | 44.9  | 26 | A | SSPWGDDKEFPV         | S | -1.1  | 3.7   |               |
| 588 | Cg0935    | 2 | 1561.7049 | -0.2 | 43    | 57  | 0  | 52.3  | 26 | V | AGASSPWGDDKEFPV      | S | -0.7  | 3.7   |               |
| 588 | Cg0935    | 1 | 1879.8112 | -3.3 | 46    | 62  | 0  | 46.9  | 22 | A | SSPWGDDKEFPVSAEET    | G | -1.2  | 3.5   |               |
| 589 | Cg2878    | 1 | 509.3213  | 0.4  | 204   | 208 | 0  | 21.3  | 21 | V | PLLPA                | Q | 1.2   | 6.02  |               |
| 591 | Cg0397    | 1 | 645.3122  | 0.2  | 368   | 373 | 0  | 25.4  | 25 | A | EAGLWA               | V | 0.4   | 3.3   |               |
| 592 | Cg2362    | 1 | 535.337   | -0.4 | 64    | 68  | 0  | 23.4  | 22 | I | PPLPL                | G | 0.6   | 6.02  |               |
| 592 | Cg2362    | 1 | 648.421   | -0.3 | 63    | 68  | 0  | 23.2  | 14 | V | IPPLPL               | G | 1.2   | 6.02  |               |
| 592 | Cg2362    | 1 | 747.4895  | -1.1 | 62    | 68  | 0  | 33.1  | 13 | R | VIPPLPL              | G | 1.6   | 6.02  |               |
| 592 | Cg2362    | 2 | 1258.6995 | -1.3 | 49    | 59  | 0  | 37.2  | 29 | V | FMVTDPPVKLL          | R | 0.9   | 6.76  |               |
| 593 | Cg0648    | 1 | 1057.5655 | 0.5  | 94    | 103 | 0  | 32.0  | 29 | A | DILANLLSEA           | G | 0.8   | 3     |               |
| 595 | Cg3226    | 1 | 573.3196  | 1.6  | 180   | 184 | 0  | 22.6  | 21 | L | LTLMP                | E | 1.4   | 6.02  |               |
| 595 | Cg3226    | 1 | 728.3646  | 0.4  | 403   | 407 | 0  | 21.3  | 20 | G | QWWPI                | A | -0.5  | 6.02  |               |
| 596 | Cg1669    | 1 | 605.3061  | 1.2  | 225   | 229 | 0  | 29.0  | 27 | E | TPEFI                | A | 0.3   | 3.3   |               |
| 597 | Cg1505    | 1 | 730.4993  | 0.0  | 7     | 12  | 0  | 22.2  | 16 | T | IFIILL               | F | 4.0   | 6.02  |               |
| 597 | Cg1505    | 2 | 2333.1539 | -0.9 | 162   | 181 | 0  | 59.3  | 30 | V | VFQKQLQQADPNAEYDLVDL | A | -0.6  | 3.5   |               |
| 598 | Cg1292    | 1 | 585.3737  | 1.5  | 204   | 208 | 0  | 27.8  | 25 | K | DILLI                | G | 2.6   | 3.1   |               |
| 599 | Cg2447    | 1 | 699.4167  | 0.0  | 407   | 413 | 0  | 42.8  | 30 | E | LVADILG              | E | 2.0   | 3.1   |               |
| 600 | Cg0334    | 1 | 927.5277  | -1.4 | 37    | 44  | 0  | 37.8  | 27 | F | ELKTVELP             | I | -0.2  | 4.26  |               |
| 600 | Cg0334    | 2 | 1798.8949 | -4.0 | 90    | 106 | 0  | 41.6  | 29 | V | INTGDNLSDEKAVPDVL    | R | -0.4  | 3.5   |               |
| 604 | Cg2731    | 2 | 668.3969  | -0.1 | 510   | 515 | 0  | 25.1  | 24 | V | RIIPNG               | K | -0.2  | 11.04 |               |
| 608 | Cg1802    | 2 | 1170.5921 | -4.1 | 200   | 208 | 0  | 28.8  | 28 | K | EPEQWLKEL            | E | -1.4  | 3.96  |               |
| 611 | Cg0363    | 1 | 701.3596  | -0.7 | 273   | 279 | 0  | 39.8  | 32 | R | GAEVVDL              | L | 0.9   | 3     |               |

| hit | accession | z | mass      | ppm  | start | end | mc | score | id | - | sequence               | + | gravy | pl    | modification  |
|-----|-----------|---|-----------|------|-------|-----|----|-------|----|---|------------------------|---|-------|-------|---------------|
| 613 | Cg2511    | 1 | 861.463   | 0.1  | 403   | 410 | 0  | 33.9  | 30 | T | VETCGLKL               | T | 0.7   | 6.28  |               |
| 614 | Cg2421    | 1 | 686.4214  | 1.6  | 174   | 179 | 0  | 22.8  | 21 | G | TIVEIL                 | A | 2.1   | 3.3   |               |
| 615 | Cg1164    | 2 | 902.5113  | 1.0  | 160   | 167 | 0  | 25.3  | 25 | G | IATLPEFL               | N | 1.4   | 3.3   |               |
| 617 | Cg1307    | 2 | 1243.5932 | -1.0 | 270   | 280 | 0  | 36.2  | 27 | I | LEDTPDEKQVA            | L | -1.3  | 3.58  |               |
| 619 | Cg2657    | 1 | 698.4578  | 1.0  | 18    | 23  | 0  | 28.2  | 22 | V | EVLLLI                 | A | 2.8   | 3.3   |               |
| 619 | Cg2657    | 2 | 2145.0127 | -2.5 | 165   | 185 | 0  | 49.2  | 28 | V | ATDETPNYYPGGNVAGRVPVA  | G | -0.8  | 4.08  |               |
| 620 | Cg0982    | 1 | 535.337   | -0.4 | 255   | 259 | 0  | 23.4  | 22 | L | PPLPI                  | L | 0.7   | 6.02  |               |
| 620 | Cg0982    | 1 | 648.421   | -0.3 | 254   | 259 | 0  | 23.2  | 14 | P | LPPLPI                 | L | 1.2   | 6.02  |               |
| 620 | Cg0982    | 1 | 723.4895  | -0.3 | 272   | 278 | 0  | 21.2  | 21 | A | VALLVIP                | A | 3.0   | 6.02  |               |
| 620 | Cg0982    | 1 | 900.4051  | 0.7  | 111   | 118 | 0  | 27.9  | 24 | A | AFMLFDAS               | S | 1.3   | 3.1   |               |
| 623 | Cg2611    | 1 | 527.3319  | 0.0  | 271   | 275 | 0  | 28.1  | 27 | D | ITVPV                  | N | 2.1   | 6.02  |               |
| 626 | Cg0554    | 1 | 656.3745  | 1.2  | 74    | 79  | 0  | 33.6  | 26 | L | IDSLPI                 | G | 1.2   | 3.1   |               |
| 627 | Cg1650    | 1 | 599.3894  | 1.5  | 246   | 250 | 0  | 30.2  | 19 | I | ILEIL                  | I | 2.6   | 3.3   |               |
| 627 | Cg1650    | 1 | 712.4734  | -0.6 | 246   | 251 | 0  | 22.9  | 22 | I | ILEILI                 | V | 2.9   | 3.3   |               |
| 628 | Cg1904    | 2 | 715.448   | 1.7  | 51    | 57  | 0  | 29.2  | 25 | F | IIGLSTL                | V | 2.1   | 6.02  |               |
| 629 | Cg3042    | 2 | 2380.205  | -1.6 | 142   | 163 | 0  | 39.4  | 30 | A | LLGDPEYLILDEPVNGLDPEGI | H | 0.0   | 2.72  |               |
| 631 | Cg2970    | 1 | 751.3938  | 0.1  | 129   | 135 | 0  | 27.5  | 26 | E | FGMILTA                | E | 2.0   | 6.02  |               |
| 635 | Cg3362    | 1 | 601.3873  | 0.3  | 140   | 144 | 0  | 27.5  | 16 | A | ILLML                  | S | 3.6   | 6.02  |               |
| 637 | Cg1798    | 1 | 656.3745  | -0.5 | 219   | 224 | 0  | 27.6  | 27 | Q | VETVLP                 | T | 1.1   | 3.3   |               |
| 639 | Cg2397    | 1 | 645.2832  | -1.5 | 68    | 72  | 0  | 25.8  | 24 | L | FFMVS                  | G | 2.2   | 6.02  | Oxidation (M) |
| 641 | Cg2796    | 1 | 853.5749  | 0.0  | 47    | 54  | 0  | 18.5  | 18 | P | IVAIRGLL               | E | 2.2   | 11.04 |               |
| 644 | Cg0308    | 1 | 635.3716  | -4.9 | 71    | 75  | 0  | 24.1  | 19 | V | LMLFL                  | K | 3.2   | 6.02  |               |
| 646 | Cg3114    | 1 | 686.4214  | 0.7  | 215   | 220 | 0  | 33.7  | 26 | P | TVLEIL                 | E | 2.0   | 3.3   |               |
| 647 | Cg0004    | 1 | 551.3683  | 2.2  | 112   | 116 | 0  | 25.9  | 18 | L | PLIPL                  | D | 1.8   | 6.02  |               |
| 647 | Cg0004    | 3 | 1474.7263 | -3.0 | 209   | 222 | 0  | 29.6  | 29 | A | RSLDSGLNDSIDIA         | V | -0.2  | 3.6   |               |
| 648 | Cg0794    | 2 | 694.3208  | 3.2  | 129   | 134 | 0  | 29.2  | 22 | P | IDTMVT                 | L | 1.0   | 3.1   | Oxidation (M) |
| 658 | Cg2304    | 1 | 656.3745  | 1.2  | 6     | 11  | 0  | 27.1  | 26 | T | LSDLPL                 | R | 0.9   | 3.1   |               |
| 660 | Cg1868    | 1 | 730.4993  | 0.0  | 5     | 10  | 0  | 22.2  | 16 | V | FLIILL                 | A | 3.9   | 6.02  |               |
| 660 | Cg1868    | 2 | 2064.8661 | -0.5 | 97    | 114 | 0  | 82.1  | 20 | T | LFDQPEDDQPNDGFGDGR     | D | -1.7  | 3.26  |               |
| 661 | Cg2719    | 1 | 557.3425  | 2.0  | 281   | 285 | 0  | 28.2  | 28 | Q | VDVLI                  | D | 2.6   | 3.1   |               |
| 661 | Cg2719    | 1 | 624.3847  | 1.3  | 253   | 258 | 0  | 17.3  | 17 | G | LLPPVS                 | L | 1.3   | 6.02  |               |
| 663 | Cg0559    | 1 | 664.3618  | -3.0 | 78    | 83  | 0  | 25.1  | 24 | P | MFALLA                 | S | 2.7   | 6.02  |               |
| 664 | Cg1527    | 1 | 730.4047  | -1.9 | 279   | 284 | 0  | 30.8  | 28 | A | MNLQLL                 | A | 1.1   | 6.02  |               |
| 665 | Cg1354    | 1 | 700.3829  | -0.6 | 493   | 498 | 0  | 31.2  | 19 | I | DLIMPI                 | G | 1.6   | 3.1   |               |
| 665 | Cg1354    | 2 | 1253.6364 | -0.8 | 71    | 82  | 0  | 30.9  | 28 | T | RATQPSAPVEQA           | Q | -0.8  | 6.98  |               |
| 671 | Cg2776    | 1 | 532.2645  | 1.1  | 397   | 401 | 0  | 30.8  | 29 | A | ASWGL                  | P | 0.7   | 6.02  |               |
| 676 | Cg1163    | 1 | 557.3425  | 2.0  | 206   | 210 | 0  | 28.2  | 28 | R | VDVII                  | I | 2.8   | 3.1   |               |
| 677 | Cg2194    | 1 | 585.3737  | 1.5  | 12    | 16  | 0  | 27.8  | 25 | Y | DLIII                  | G | 2.8   | 3.1   |               |
| 681 | Cg0400    | 1 | 726.3225  | -1.7 | 237   | 242 | 0  | 25.3  | 24 | A | GEFDFI                 | L | 0.5   | 3     |               |
| 682 | Cg1697    | 2 | 1212.6462 | 3.5  | 352   | 363 | 0  | 32.8  | 28 | L | LSSGPRAGLNEI           | N | -0.1  | 6.98  |               |

| hit | accession | z | mass      | ppm  | start | end | mc | score | id | - | sequence            | + | gravy | pl   | modification  |
|-----|-----------|---|-----------|------|-------|-----|----|-------|----|---|---------------------|---|-------|------|---------------|
| 685 | Cg1089    | 2 | 728.4068  | 1.0  | 387   | 394 | 0  | 30.3  | 30 | I | AAGLLSPT            | S | 1.0   | 6.02 |               |
| 686 | Cg1466    | 1 | 938.4022  | 0.1  | 46    | 52  | 0  | 26.6  | 26 | V | WDFIEET             | N | -0.7  | 2.94 |               |
| 688 | Cg1434    | 1 | 941.507   | 0.5  | 235   | 243 | 0  | 28.9  | 27 | A | TEVTPPTVV           | G | 0.4   | 3.3  |               |
| 696 | Cg0783    | 2 | 1004.5291 | -0.1 | 97    | 105 | 0  | 42.4  | 29 | A | LLADRPSYA           | N | -0.1  | 6.7  |               |
| 697 | Cg0041    | 2 | 1799.7791 | 1.3  | 136   | 151 | 0  | 23.7  | 23 | I | DYSPGVDPHPFWTDP     | R | -1.0  | 3.6  |               |
| 700 | Cg1647    | 1 | 630.3775  | -4.8 | 178   | 183 | 0  | 27.2  | 27 | L | LCGLLI              | P | 3.0   | 5.32 |               |
| 700 | Cg1647    | 1 | 878.5841  | -1.8 | 167   | 174 | 0  | 23.7  | 13 | Q | TLPLLIIP            | Q | 2.0   | 6.02 |               |
| 703 | Cg1282    | 1 | 545.3213  | -0.2 | 204   | 208 | 0  | 29.7  | 26 | I | LPFGI               | G | 1.8   | 6.02 |               |
| 703 | Cg1282    | 1 | 1069.6899 | -3.4 | 199   | 208 | 0  | 27.5  | 18 | A | LIGKILPFGI          | G | 1.8   | 10.1 |               |
| 704 | Cg2856    | 1 | 787.3963  | 1.3  | 168   | 174 | 0  | 32.4  | 29 | V | VEADELL             | G | 0.4   | 2.94 |               |
| 707 | Cg1582    | 1 | 599.3894  | 1.5  | 279   | 283 | 0  | 30.2  | 19 | V | LLELL               | T | 2.3   | 3.3  |               |
| 709 | Cg2550    | 1 | 632.3897  | -1.3 | 141   | 146 | 0  | 28.1  | 27 | S | FLAGIL              | L | 2.7   | 6.02 |               |
| 713 | Cg2208    | 2 | 728.4068  | 1.0  | 20    | 26  | 0  | 30.6  | 30 | T | QALDVIA             | D | 1.3   | 3.1  |               |
| 716 | Cg2325    | 2 | 981.4742  | 1.2  | 24    | 31  | 0  | 28.2  | 26 | A | DFFRPMGI            | N | 0.3   | 6.78 |               |
| 716 | Cg2325    | 1 | 1086.5499 | -0.9 | 13    | 21  | 0  | 41.7  | 28 | A | DFLHVWGLT           | V | 0.7   | 4.94 |               |
| 716 | Cg2325    | 1 | 1132.5189 | 1.2  | 32    | 41  | 0  | 29.2  | 28 | I | NFPPADWSLS          | S | -0.4  | 3.1  |               |
| 716 | Cg2325    | 1 | 1256.6554 | -1.0 | 13    | 23  | 0  | 49.6  | 28 | A | DFLHVWGLTVA         | D | 1.1   | 4.94 |               |
| 717 | Cg2504    | 1 | 795.449   | -0.9 | 42    | 48  | 0  | 29.3  | 24 | L | IALEHTI             | N | 1.0   | 5.12 |               |
| 719 | Cg2809    | 1 | 674.4367  | 1.5  | 147   | 152 | 0  | 25.0  | 24 | G | FIIGLI              | G | 3.3   | 6.02 |               |
| 719 | Cg2809    | 1 | 675.3956  | 0.7  | 145   | 151 | 0  | 39.7  | 28 | P | GGFIIGL             | I | 2.1   | 6.02 |               |
| 721 | Cg2535    | 1 | 1395.6882 | -1.0 | 123   | 136 | 0  | 60.1  | 29 | L | SGDDNIPLDLPLGA      | G | -0.1  | 2.82 |               |
| 721 | Cg2535    | 1 | 1965.9895 | -2.3 | 118   | 136 | 0  | 60.7  | 30 | T | NIETLSGDDNIPLDLPLGA | G | 0.0   | 2.78 |               |
| 723 | Cg0221    | 1 | 539.3683  | -0.2 | 275   | 279 | 0  | 26.5  | 23 | Q | IVVPL               | S | 3.0   | 6.02 |               |
| 726 | Cg2659    | 1 | 715.4302  | 1.0  | 150   | 156 | 0  | 39.8  | 27 | L | MLIGGLI             | V | 2.5   | 6.02 |               |
| 727 | Cg0362    | 1 | 539.3683  | -0.2 | 273   | 277 | 0  | 26.2  | 23 | L | VLVIP               | A | 3.0   | 6.02 |               |
| 727 | Cg0362    | 1 | 699.4167  | 0.6  | 174   | 180 | 0  | 42.6  | 30 | G | GIDLLLG             | I | 1.7   | 3.1  |               |
| 728 | Cg1753    | 1 | 598.4418  | 1.7  | 377   | 381 | 0  | 28.1  | 17 | T | LLKLL               | A | 2.3   | 10.1 |               |
| 729 | Cg0524    | 1 | 545.3213  | -0.2 | 251   | 255 | 0  | 29.7  | 26 | V | PIFGL               | G | 1.8   | 6.02 |               |
| 730 | Cg2485    | 1 | 635.3716  | -4.9 | 176   | 180 | 0  | 24.1  | 19 | E | MLIFL               | G | 3.4   | 6.02 |               |
| 733 | Cg0873    | 1 | 862.4913  | 3.6  | 227   | 234 | 0  | 33.6  | 27 | W | VVHPGEIL            | G | 1.0   | 5.12 |               |
| 734 | Cg1794    | 1 | 599.3894  | 1.5  | 61    | 65  | 0  | 30.2  | 19 | I | ILELI               | D | 2.6   | 3.3  |               |
| 735 | Cg0062    | 2 | 1826.8421 | -0.5 | 290   | 306 | 0  | 37.3  | 27 | S | DAGTEDIPTIEEPPEKS   | S | -1.3  | 3.44 |               |
| 737 | Cg0123    | 1 | 551.3683  | 0.9  | 194   | 198 | 0  | 34.3  | 18 | Y | LPIPI               | V | 1.9   | 6.02 |               |
| 740 | Cg1503    | 1 | 1463.7694 | -2.4 | 143   | 155 | 0  | 34.7  | 29 | I | DLQSLLSNMFLLA       | V | 1.0   | 3.1  |               |
| 741 | Cg1623    | 1 | 577.3475  | 2.3  | 250   | 254 | 0  | 28.1  | 28 | A | IYGLI               | A | 2.2   | 5.92 |               |
| 741 | Cg1623    | 1 | 704.4473  | 0.6  | 263   | 268 | 0  | 22.7  | 22 | I | SLLLFI              | - | 3.0   | 6.02 |               |
| 743 | Cg0475    | 1 | 930.5426  | 1.0  | 55    | 62  | 0  | 22.6  | 22 | A | TLFEVLPL            | E | 1.6   | 3.3  |               |
| 743 | Cg0475    | 1 | 1566.8909 | -2.8 | 56    | 69  | 0  | 37.1  | 25 | T | LFEVLPLEVLPEAV      | R | 1.3   | 3.02 |               |
| 746 | Cg3197    | 1 | 656.3745  | -1.4 | 577   | 582 | 0  | 27.3  | 27 | I | TDVIPI              | V | 1.2   | 3.1  |               |
| 750 | Cg1776    | 1 | 698.3309  | -3.7 | 76    | 81  | 0  | 28.1  | 26 | A | VYAMSI              | D | 1.7   | 5.92 | Oxidation (M) |

| hit | accession | z | mass      | ppm  | start | end | mc | score | id | - | sequence                       | + | gravy | pl   | modification |
|-----|-----------|---|-----------|------|-------|-----|----|-------|----|---|--------------------------------|---|-------|------|--------------|
| 752 | Cg0914    | 1 | 601.3873  | 0.8  | 177   | 181 | 0  | 22.9  | 16 | E | IMILL                          | N | 3.7   | 6.02 |              |
| 752 | Cg0914    | 1 | 715.4302  | 1.0  | 177   | 182 | 0  | 29.5  | 27 | E | IMILLN                         | R | 2.5   | 6.02 |              |
| 752 | Cg0914    | 3 | 3310.6715 | -0.8 | 163   | 192 | 0  | 36.4  | 31 | A | DEPTGNLDPDTSDEIMILLNRINRLGTTVV | M | -0.3  | 3.68 |              |
| 754 | Cg1685    | 2 | 1898.8547 | -1.2 | 68    | 83  | 0  | 47.3  | 25 | I | EAPQPNFEQHYQQGQV               | Q | -1.7  | 4.24 |              |
| 754 | Cg1685    | 2 | 2263.0465 | -2.5 | 46    | 65  | 0  | 36.1  | 27 | M | NKDGDTPEQQQQPQQIAPN            | Q | -2.3  | 3.7  |              |
| 754 | Cg1685    | 3 | 2484.1187 | -3.3 | 41    | 61  | 0  | 36.3  | 25 | S | EVKEMNKDGDTPPEQQQQPQQQ         | I | -2.5  | 3.92 |              |
| 755 | Cg0007    | 1 | 1075.4669 | -1.2 | 44    | 53  | 0  | 26.3  | 25 | W | EVVDNSVDEA                     | M | -0.4  | 2.84 |              |
| 756 | Cg1452    | 1 | 557.3425  | 2.0  | 195   | 199 | 0  | 28.2  | 28 | P | VDVIL                          | D | 2.6   | 3.1  |              |
| 760 | Cg1836    | 2 | 2375.1969 | -0.7 | 215   | 236 | 0  | 58.2  | 31 | G | QYVVDPNSDAQGILTDLITRSA         | N | -0.1  | 3.6  |              |
| 761 | Cg0064    | 1 | 829.4334  | 0.6  | 273   | 279 | 0  | 34.6  | 27 | P | VDNWLLA                        | D | 0.8   | 3.1  |              |
| 761 | Cg0064    | 2 | 1368.6746 | -1.9 | 184   | 196 | 0  | 38.9  | 29 | Q | GVPQSQVDANRQA                  | A | -1.0  | 6.78 |              |
| 762 | Cg0198    | 1 | 884.4756  | -2.1 | 44    | 51  | 0  | 32.9  | 27 | K | LFIVAADH                       | P | 1.5   | 4.94 |              |
| 763 | Cg3312    | 1 | 630.3775  | -4.8 | 342   | 347 | 0  | 27.2  | 27 | S | CVAILI                         | L | 3.6   | 5.32 |              |
| 763 | Cg3312    | 1 | 739.4632  | 1.6  | 382   | 387 | 0  | 21.8  | 15 | S | LWLVPL                         | A | 2.2   | 6.02 |              |
| 765 | Cg2334    | 1 | 787.36    | -3.0 | 376   | 382 | 0  | 25.3  | 25 | G | PDDDITL                        | F | -0.6  | 2.82 |              |
| 765 | Cg2334    | 1 | 1093.6496 | -1.6 | 200   | 212 | 0  | 21.9  | 21 | M | VPVGGGGLLAGVV                  | S | 1.7   | 6.02 |              |
| 767 | Cg1648    | 1 | 712.4734  | -0.6 | 264   | 269 | 0  | 22.9  | 22 | Q | LIELLI                         | T | 2.8   | 3.3  |              |
| 769 | Cg1806    | 1 | 509.3213  | 0.6  | 150   | 154 | 0  | 31.2  | 21 | M | PLPIA                          | L | 1.4   | 6.02 |              |
| 769 | Cg1806    | 2 | 800.4643  | 1.6  | 32    | 38  | 0  | 45.9  | 29 | I | LDALLEK                        | D | 0.3   | 4.08 |              |
| 774 | Cg2418    | 1 | 641.2809  | -0.2 | 215   | 220 | 0  | 20.9  | 19 | K | FAGNYA                         | A | 0.2   | 5.92 |              |
| 777 | Cg2215    | 1 | 1054.4931 | -1.0 | 4     | 13  | 0  | 30.5  | 26 | A | NTPAVQEEPA                     | Y | -1.0  | 3.12 |              |
| 777 | Cg2215    | 1 | 1125.5302 | -1.3 | 3     | 13  | 0  | 28.9  | 27 | T | ANTPAVQEEPA                    | Y | -0.8  | 3.12 |              |
| 781 | Cg1727    | 1 | 667.3945  | -0.7 | 95    | 99  | 0  | 23.2  | 15 | A | FYILI                          | T | 2.9   | 5.92 |              |
| 782 | Cg0510    | 1 | 770.4538  | 0.9  | 151   | 157 | 0  | 41.4  | 29 | P | AQIVELV                        | Q | 1.6   | 3.3  |              |
| 784 | Cg1713    | 1 | 1276.6915 | -1.6 | 177   | 188 | 0  | 35.4  | 27 | A | SLLGLDLADYLVV                  | N | 1.3   | 2.92 |              |
| 791 | Cg3134    | 1 | 930.5208  | 0.9  | 115   | 123 | 0  | 34.0  | 29 | Y | IVGSALQMI                      | P | 1.8   | 6.02 |              |
| 792 | Cg2767    | 1 | 834.3759  | -1.3 | 222   | 229 | 0  | 54.2  | 27 | A | FIASDDPA                       | A | 0.2   | 2.92 |              |
| 798 | Cg2313    | 1 | 678.3741  | 4.9  | 167   | 171 | 0  | 23.3  | 23 | Q | WTIFL                          | E | 1.9   | 6.02 |              |
| 802 | Cg0531    | 1 | 640.4523  | -0.9 | 125   | 130 | 0  | 28.6  | 25 | L | ILIGIL                         | C | 3.5   | 6.02 |              |
| 804 | Cg1761    | 2 | 1055.536  | -0.2 | 336   | 346 | 0  | 33.1  | 27 | I | AGPLTAEQRGG                    | A | -0.7  | 6.98 |              |
| 805 | Cg2896    | 1 | 751.3752  | -0.7 | 144   | 150 | 0  | 29.1  | 29 | E | FDLSVTA                        | T | 1.1   | 3.1  |              |
| 806 | Cg2701    | 1 | 794.5266  | 0.0  | 156   | 163 | 0  | 21.5  | 21 | L | LAILPGIV                       | L | 2.6   | 6.02 |              |
| 806 | Cg2701    | 1 | 1008.6583 | -1.8 | 154   | 163 | 0  | 31.0  | 20 | R | TLAILPGIV                      | L | 2.4   | 6.02 |              |
| 816 | Cg3190    | 1 | 624.3847  | 1.8  | 121   | 126 | 0  | 26.4  | 17 | K | SPVPLL                         | G | 1.3   | 6.02 |              |
| 817 | Cg0045    | 1 | 763.3864  | -1.0 | 302   | 308 | 0  | 33.5  | 27 | T | NQGIVYA                        | G | 0.3   | 5.92 |              |
| 822 | Cg1540    | 1 | 704.4473  | 0.6  | 10    | 15  | 0  | 22.7  | 22 | L | LSLIFL                         | F | 3.0   | 6.02 |              |
| 822 | Cg1540    | 1 | 800.4644  | -0.7 | 194   | 201 | 0  | 36.7  | 29 | N | DLAIIISLG                      | G | 1.7   | 3.1  |              |
| 825 | Cg3047    | 1 | 622.4054  | -0.6 | 118   | 123 | 0  | 27.8  | 17 | L | IPLAPL                         | H | 1.8   | 6.02 |              |
| 830 | Cg0412    | 1 | 712.4734  | -0.6 | 143   | 148 | 0  | 22.9  | 22 | R | ILEILL                         | G | 2.8   | 3.3  |              |
| 831 | Cg0193    | 1 | 834.3971  | -0.5 | 504   | 511 | 0  | 28.5  | 26 | V | LTSEGIDT                       | D | -0.2  | 3    |              |

| hit | accession | z | mass      | ppm  | start | end | mc | score | id | - | sequence                 | + | gravy | pl    | modification  |
|-----|-----------|---|-----------|------|-------|-----|----|-------|----|---|--------------------------|---|-------|-------|---------------|
| 832 | Cg0265    | 2 | 974.4168  | 3.8  | 153   | 160 | 0  | 25.3  | 25 | Y | LFDEPMAH                 | L | -0.2  | 4.06  | Oxidation (M) |
| 834 | Cg0759    | 1 | 509.3213  | 0.4  | 266   | 270 | 0  | 21.3  | 21 | T | IPLPA                    | E | 1.4   | 6.02  |               |
| 834 | Cg0759    | 1 | 580.3584  | 1.0  | 125   | 130 | 0  | 28.6  | 18 | I | PPILAA                   | A | 1.5   | 6.02  |               |
| 840 | Cg2836    | 1 | 767.3813  | -0.9 | 87    | 93  | 0  | 36.4  | 26 | I | IEAIDAH                  | I | 0.3   | 4.06  |               |
| 841 | Cg0296    | 1 | 599.3894  | 1.5  | 352   | 356 | 0  | 30.2  | 19 | L | LLEIL                    | C | 2.5   | 3.3   |               |
| 846 | Cg2498    | 1 | 815.5157  | 0.2  | 179   | 185 | 0  | 18.8  | 17 | T | PIIIFLT                  | F | 2.5   | 6.02  |               |
| 847 | Cg2255    | 1 | 509.3213  | 0.6  | 198   | 202 | 0  | 31.2  | 21 | Y | IPPIA                    | L | 1.5   | 6.02  |               |
| 848 | Cg3106    | 1 | 686.4214  | 0.6  | 18    | 23  | 0  | 39.8  | 26 | S | LELSLL                   | R | 1.8   | 3.3   |               |
| 854 | Cg0778    | 1 | 836.5735  | -0.5 | 201   | 208 | 0  | 25.0  | 18 | A | IIPIVGL                  | I | 3.0   | 6.02  |               |
| 856 | Cg1343    | 1 | 676.416   | 1.2  | 269   | 274 | 0  | 40.4  | 25 | R | YLGVLL                   | Y | 2.3   | 5.92  |               |
| 856 | Cg1343    | 1 | 832.5171  | -3.2 | 267   | 273 | 0  | 28.9  | 20 | R | LRYLGVL                  | L | 1.3   | 9.84  |               |
| 857 | Cg0124    | 1 | 509.3213  | -0.2 | 335   | 339 | 0  | 30.4  | 21 | N | PIPAI                    | P | 1.5   | 6.02  |               |
| 857 | Cg0124    | 1 | 699.4167  | 0.6  | 310   | 316 | 0  | 42.6  | 30 | R | IGDLILG                  | N | 1.8   | 3.1   |               |
| 859 | Cg1696    | 1 | 667.333   | 1.5  | 245   | 250 | 0  | 23.2  | 22 | T | FLNGFA                   | Q | 1.2   | 6.02  |               |
| 864 | Cg0928    | 2 | 1929.0605 | 0.0  | 42    | 59  | 0  | 51.1  | 28 | S | TLLTMIGRLLGIDEGNIT       | V | 0.7   | 4.08  |               |
| 865 | Cg3403    | 1 | 651.3665  | 0.6  | 231   | 235 | 0  | 24.1  | 17 | V | YMIII                    | A | 2.8   | 5.92  |               |
| 866 | Cg0368    | 1 | 758.436   | -4.9 | 33    | 40  | 0  | 32.4  | 32 | I | VCGLIIAA                 | M | 2.8   | 5.32  |               |
| 867 | Cg1528    | 1 | 585.3737  | 1.5  | 100   | 104 | 0  | 27.8  | 25 | L | DILIL                    | H | 2.6   | 3.1   |               |
| 867 | Cg1528    | 1 | 698.4578  | 1.0  | 99    | 104 | 0  | 28.2  | 22 | T | LDILIL                   | H | 2.8   | 3.1   |               |
| 868 | Cg0143    | 1 | 567.3057  | 0.4  | 214   | 218 | 0  | 25.6  | 19 | F | FLAFA                    | H | 2.6   | 6.02  |               |
| 869 | Cg2135    | 1 | 680.3381  | 0.1  | 457   | 462 | 0  | 34.7  | 28 | G | DFVTVT                   | V | 1.1   | 3.1   |               |
| 872 | Cg2784    | 1 | 802.4225  | -2.2 | 205   | 211 | 0  | 32.0  | 31 | M | FQDIPLA                  | V | 0.6   | 3.1   |               |
| 876 | Cg0514    | 1 | 657.3196  | 2.0  | 47    | 51  | 0  | 24.6  | 23 | A | FMIFT                    | G | 2.3   | 6.02  |               |
| 876 | Cg0514    | 1 | 711.4894  | -1.3 | 136   | 142 | 0  | 30.7  | 25 | A | IIAVLLA                  | L | 3.5   | 6.02  |               |
| 876 | Cg0514    | 1 | 832.3789  | 0.0  | 2     | 9   | 0  | 34.9  | 29 | M | PSMFPSPA                 | T | 0.0   | 6.02  |               |
| 881 | Cg3119    | 1 | 599.3894  | 1.5  | 402   | 406 | 0  | 30.2  | 19 | A | IIELL                    | D | 2.6   | 3.3   |               |
| 881 | Cg3119    | 1 | 823.5392  | 4.6  | 71    | 77  | 0  | 16.4  | 16 | K | PRLRLLG                  | N | 0.1   | 12.4  |               |
| 883 | Cg3396    | 1 | 526.3115  | 0.8  | 221   | 225 | 0  | 32.0  | 30 | Q | NPILA                    | K | 1.0   | 6.02  |               |
| 884 | Cg0448    | 1 | 751.3938  | 0.1  | 43    | 49  | 0  | 27.5  | 26 | G | MGFLLTA                  | L | 1.9   | 6.02  |               |
| 884 | Cg0448    | 2 | 1390.6477 | -1.2 | 26    | 38  | 0  | 49.1  | 28 | V | AYSSPHSSLERSA            | T | -0.8  | 7.76  |               |
| 885 | Cg0167    | 1 | 711.4894  | -1.3 | 6     | 12  | 0  | 30.7  | 25 | T | IAIVLLA                  | S | 3.5   | 6.02  |               |
| 887 | Cg0216    | 1 | 730.4993  | 0.0  | 97    | 102 | 0  | 22.2  | 16 | V | FIILII                   | L | 4.1   | 6.02  |               |
| 887 | Cg0216    | 1 | 802.4953  | 0.6  | 93    | 99  | 0  | 32.1  | 24 | L | AQIVFII                  | L | 2.7   | 6.02  |               |
| 889 | Cg0945    | 1 | 866.4022  | 0.9  | 68    | 75  | 0  | 31.0  | 28 | S | FLDSIDAS                 | L | 0.5   | 2.92  |               |
| 892 | Cg0727    | 1 | 630.3489  | -0.3 | 381   | 386 | 0  | 25.6  | 22 | E | WAGKAV                   | Y | 0.4   | 10.1  |               |
| 892 | Cg0727    | 2 | 668.397   | -0.1 | 430   | 436 | 0  | 25.1  | 24 | D | RLIGGPG                  | L | 0.1   | 11.04 |               |
| 893 | Cg1166    | 1 | 802.4953  | 0.6  | 73    | 80  | 0  | 32.1  | 24 | F | VAAAVFIL                 | W | 3.1   | 6.02  |               |
| 901 | Cg2096    | 1 | 885.3505  | -1.1 | 48    | 55  | 0  | 35.0  | 22 | S | GYQDPYGS                 | G | -1.6  | 3.1   |               |
| 901 | Cg2096    | 2 | 1765.8271 | -0.3 | 56    | 72  | 0  | 36.4  | 28 | S | GYTGGFENSPLNAPKNT        | A | -1.0  | 6.86  |               |
| 901 | Cg2096    | 2 | 2313.9774 | -0.9 | 25    | 47  | 0  | 31.0  | 19 | A | NQGEPTYGAPYGESFGPSSGAQQS | G | -1.2  | 3.12  |               |

| hit | accession | z | mass      | ppm  | start | end | mc | score | id | - | sequence               | + | gravy | pl   | modification |
|-----|-----------|---|-----------|------|-------|-----|----|-------|----|---|------------------------|---|-------|------|--------------|
| 903 | Cg2762    | 1 | 545.3247  | 2.0  | 86    | 90  | 0  | 29.9  | 28 | K | MIVIA                  | C | 3.4   | 6.02 |              |
| 903 | Cg2762    | 1 | 840.4957  | -0.8 | 107   | 114 | 0  | 34.2  | 24 | Y | SVPVVEVI               | L | 1.9   | 3.3  |              |
| 907 | Cg2374    | 1 | 642.3952  | 1.2  | 11    | 16  | 0  | 27.2  | 27 | K | LIDGIL                 | K | 2.1   | 3.1  |              |
| 910 | Cg1387    | 1 | 656.3745  | -1.1 | 215   | 220 | 0  | 27.4  | 27 | R | SIVEPL                 | A | 1.1   | 3.3  |              |
| 910 | Cg1387    | 1 | 686.4214  | 0.7  | 18    | 23  | 0  | 33.7  | 26 | P | VTLELI                 | T | 2.0   | 3.3  |              |
| 910 | Cg1387    | 1 | 1400.7188 | -2.8 | 295   | 308 | 0  | 41.7  | 29 | A | DLGVVGDLDIAPA          | L | 1.0   | 2.82 |              |
| 914 | Cg0016    | 1 | 584.3897  | 1.5  | 25    | 30  | 0  | 31.7  | 31 | S | IIGLVA                 | W | 3.1   | 6.02 |              |
| 914 | Cg0016    | 1 | 861.4596  | 4.1  | 100   | 107 | 0  | 33.9  | 30 | V | DLFGGLQI               | Q | 0.9   | 3.1  |              |
| 914 | Cg0016    | 1 | 1403.6834 | 0.3  | 46    | 58  | 0  | 42.5  | 29 | A | GVWQNFNDVIGGV          | G | 0.3   | 3.1  |              |
| 916 | Cg1128    | 1 | 829.397   | -0.4 | 29    | 37  | 0  | 33.2  | 28 | Q | GGPLGPEFG              | K | -0.2  | 3.3  |              |
| 916 | Cg1128    | 1 | 1174.5506 | -1.7 | 78    | 88  | 0  | 28.1  | 28 | R | NGLDPFDIEGV            | R | -0.1  | 2.88 |              |
| 919 | Cg1298    | 1 | 580.3584  | 1.0  | 166   | 171 | 0  | 28.6  | 18 | I | PPLLAA                 | R | 1.3   | 6.02 |              |
| 929 | Cg0422    | 1 | 1548.8035 | -3.6 | 189   | 202 | 0  | 31.2  | 29 | D | TKIANAYITPEITD         | L | -0.2  | 4.08 |              |
| 932 | Cg1458    | 1 | 654.4064  | -0.5 | 187   | 192 | 0  | 24.2  | 23 | D | NLPIKA                 | R | 0.2   | 10.1 |              |
| 934 | Cg0263    | 2 | 2422.1805 | 0.8  | 247   | 268 | 0  | 67.5  | 30 | A | FAEFLSSDRAKEILASYGFGTN | - | -0.1  | 4.44 |              |
| 935 | Cg0405    | 1 | 1956.9892 | -4.1 | 297   | 315 | 0  | 69.5  | 30 | V | GIGVLGANEILDDLEETLS    | - | 0.3   | 2.8  |              |
| 940 | Cg3177    | 1 | 829.4949  | 0.0  | 240   | 246 | 0  | 30.2  | 29 | D | LLDFLPL                | T | 1.8   | 3.1  |              |
| 942 | Cg0624    | 1 | 716.3705  | -0.1 | 157   | 163 | 0  | 32.1  | 32 | K | SQAELGL                | D | 0.2   | 3.3  |              |
| 947 | Cg3426    | 1 | 752.3705  | -2.3 | 90    | 97  | 0  | 38.7  | 26 | P | EPAAPAPT               | Q | -0.5  | 3.3  |              |
| 949 | Cg3133    | 1 | 757.3858  | -0.8 | 155   | 161 | 0  | 29.6  | 26 | L | EELSPLA                | R | 0.0   | 3.12 |              |
| 953 | Cg1277    | 1 | 957.5383  | -2.4 | 48    | 56  | 0  | 30.8  | 28 | T | ELTIVGVDL              | I | 1.4   | 3    |              |
| 953 | Cg1277    | 1 | 1531.777  | -3.3 | 36    | 49  | 0  | 39.1  | 30 | A | VDLLSDNAFPVTEL         | T | 0.5   | 2.88 |              |
| 957 | Cg3336    | 1 | 624.3847  | 1.3  | 286   | 291 | 0  | 17.3  | 17 | V | ILPSVP                 | E | 1.4   | 6.02 |              |
| 958 | Cg2908    | 1 | 850.5892  | -0.1 | 11    | 18  | 0  | 34.9  | 16 | G | VLPLALLL               | A | 2.9   | 6.02 |              |
| 962 | Cg1890    | 2 | 754.4337  | 1.5  | 187   | 193 | 0  | 36.1  | 27 | G | DPGVLRV                | H | 0.3   | 6.78 |              |
| 964 | Cg1165    | 1 | 688.4523  | 0.1  | 55    | 60  | 0  | 24.4  | 21 | Q | LIFIIA                 | T | 3.7   | 6.02 |              |
| 964 | Cg1165    | 1 | 752.3705  | -2.3 | 247   | 254 | 0  | 29.7  | 26 | S | APEAPAPT               | D | -0.5  | 3.3  |              |
| 965 | Cg2549    | 1 | 686.4214  | 0.6  | 489   | 494 | 0  | 39.8  | 26 | A | LELSLI                 | G | 1.9   | 3.3  |              |
| 968 | Cg1369    | 2 | 1733.8472 | -1.8 | 26    | 41  | 0  | 38.8  | 30 | A | QTTEGEIGVLPDHEPL       | L | -0.6  | 3.68 |              |
| 969 | Cg1482    | 1 | 749.3959  | 1.1  | 72    | 78  | 0  | 40.3  | 29 | A | TGAEIFL                | S | 1.2   | 3.3  |              |
| 970 | Cg1865    | 1 | 704.4473  | 0.6  | 52    | 57  | 0  | 22.7  | 22 | V | ISILFI                 | A | 3.2   | 6.02 |              |
| 970 | Cg1865    | 1 | 725.4687  | -0.4 | 276   | 282 | 0  | 24.3  | 23 | T | IISALPI                | I | 2.4   | 6.02 |              |
| 971 | Cg2294    | 1 | 1417.7089 | -3.1 | 119   | 131 | 0  | 34.3  | 29 | A | NSGTLSDWAEII           | N | 0.3   | 3    |              |
| 971 | Cg2294    | 2 | 1827.7873 | 2.2  | 195   | 209 | 0  | 46.9  | 23 | V | MWDALDEDIDFTEKT        | Q | -0.8  | 3.32 |              |
| 981 | Cg3389    | 1 | 770.4538  | 1.7  | 139   | 146 | 0  | 33.6  | 28 | E | LLDAGLIG               | E | 1.7   | 3.1  |              |
| 985 | Cg0534    | 1 | 583.4309  | -0.2 | 66    | 70  | 0  | 24.1  | 18 | G | ILIIL                  | G | 4.2   | 6.02 |              |
| 985 | Cg0534    | 2 | 1009.6535 | 0.6  | 111   | 121 | 0  | 36.9  | 21 | A | IGAGALLLIIV            | G | 2.7   | 6.02 |              |
| 994 | Cg1035    | 1 | 984.5426  | -3.4 | 157   | 165 | 0  | 32.6  | 28 | D | LMRVLADAP              | P | 0.9   | 6.78 |              |
| 997 | Cg0862    | 1 | 585.3737  | 1.5  | 48    | 52  | 0  | 27.8  | 25 | P | DLILL                  | D | 2.5   | 3.1  |              |
| 997 | Cg0862    | 1 | 700.3829  | -0.6 | 52    | 57  | 0  | 21.5  | 19 | L | LDLMLP                 | G | 1.4   | 3.1  |              |



| hit  | accession | z | mass      | ppm  | start | end | mc | score | id | - | sequence                            | + | gravy | pl    | modification |
|------|-----------|---|-----------|------|-------|-----|----|-------|----|---|-------------------------------------|---|-------|-------|--------------|
| 1001 | Cg3407    | 1 | 715.4302  | 1.0  | 1     | 7   | 0  | 34.6  | 27 | - | MIIGAV                              | F | 3.0   | 6.02  |              |
| 1005 | Cg1649    | 1 | 711.4894  | -1.3 | 33    | 39  | 0  | 30.7  | 25 | A | ALIVLIA                             | T | 3.5   | 6.02  |              |
| 1010 | Cg0091    | 1 | 630.3774  | -4.6 | 91    | 96  | 0  | 27.2  | 27 | A | AMALLL                              | G | 2.8   | 6.02  |              |
| 1011 | Cg0932    | 1 | 630.3775  | -4.8 | 32    | 37  | 0  | 27.2  | 27 | L | CLGLIL                              | G | 3.0   | 5.32  |              |
| 1018 | Cg1104    | 1 | 863.4753  | -3.0 | 21    | 29  | 0  | 31.0  | 28 | S | VAVFTSAVA                           | L | 2.1   | 6.02  |              |
| 1019 | Cg2900    | 2 | 668.397   | 0.4  | 158   | 163 | 0  | 34.5  | 24 | R | RIPGVQ                              | K | -0.2  | 11.04 |              |
| 1021 | Cg0244    | 2 | 1009.6536 | 0.3  | 81    | 90  | 0  | 30.0  | 21 | L | LVGNLVLLAV                          | D | 2.6   | 6.02  |              |
| 1025 | Cg3170    | 1 | 577.3475  | 2.3  | 240   | 244 | 0  | 28.1  | 28 | I | IYGII                               | M | 2.4   | 5.92  |              |
| 1028 | Cg0010    | 2 | 800.4644  | 1.6  | 97    | 104 | 0  | 45.9  | 29 | A | LDAILSVA                            | D | 2.0   | 3.1   |              |
| 1029 | Cg2938    | 1 | 599.3894  | 1.5  | 263   | 267 | 0  | 30.2  | 19 | V | IIEII                               | F | 2.9   | 3.3   |              |
| 1033 | Cg1122    | 1 | 887.46    | -0.6 | 30    | 37  | 0  | 31.8  | 30 | I | DSELKVPT                            | A | -0.8  | 4.08  |              |
| 1038 | Cg2160    | 1 | 585.3737  | 1.5  | 471   | 475 | 0  | 27.8  | 25 | G | DLIIL                               | S | 2.6   | 3.1   |              |
| 1039 | Cg0742    | 1 | 816.4382  | 0.0  | 146   | 152 | 0  | 34.4  | 32 | N | ADWLLVT                             | G | 1.2   | 3.1   |              |
| 1040 | Cg0291    | 1 | 642.3588  | 0.9  | 283   | 288 | 0  | 36.2  | 27 | A | SIDVPI                              | D | 1.2   | 3.1   |              |
| 1042 | Cg0389    | 1 | 669.4425  | -0.4 | 11    | 16  | 0  | 31.6  | 28 | G | QVILVV                              | G | 2.9   | 6.02  |              |
| 1042 | Cg0389    | 1 | 844.429   | 1.8  | 76    | 84  | 0  | 40.1  | 30 | V | SSAPAAQTL                           | S | 0.2   | 6.02  |              |
| 1047 | Cg0092    | 2 | 1118.5026 | -1.3 | 99    | 108 | 0  | 48.1  | 25 | A | MTQDDGIRPS                          | Q | -1.2  | 3.88  |              |
| 1047 | Cg0092    | 2 | 1363.6983 | 0.4  | 109   | 121 | 0  | 30.0  | 29 | S | QDGTGLSKDLFLA                       | A | -0.1  | 3.88  |              |
| 1051 | Cg0472    | 2 | 3576.7795 | -2.9 | 132   | 165 | 0  | 38.9  | 31 | T | GGNSTSQGF AEQLIQELIKVTDITSDAANQTIEV | E | -0.2  | 3.5   |              |
| 1055 | Cg2955    | 1 | 532.2645  | 1.1  | 29    | 33  | 0  | 30.8  | 29 | T | SAWGI                               | L | 0.8   | 6.02  |              |
| 1060 | Cg2994    | 1 | 825.3141  | -0.1 | 45    | 52  | 0  | 21.3  | 21 | A | DGSDFNA                             | R | -1.0  | 2.92  |              |
| 1061 | Cg2894    | 1 | 712.4734  | -0.6 | 96    | 101 | 0  | 39.9  | 22 | P | ELLLLI                              | D | 2.7   | 3.3   |              |
| 1062 | Cg2342    | 1 | 787.3824  | 4.8  | 71    | 78  | 0  | 33.9  | 30 | Y | AREGADVA                            | I | -0.3  | 4.08  |              |
| 1064 | Cg1522    | 2 | 1224.6714 | 1.1  | 113   | 123 | 0  | 31.8  | 26 | S | IEKVDSHTALL                         | T | 0.2   | 5.22  |              |
| 1065 | Cg3163    | 1 | 796.4555  | -3.9 | 72    | 79  | 0  | 27.0  | 22 | R | RAGQPVGL                            | Y | -0.1  | 11.04 |              |
| 1068 | Cg0923    | 1 | 640.4523  | 0.3  | 25    | 30  | 0  | 30.8  | 25 | G | IIGLIL                              | S | 3.5   | 6.02  |              |
| 1068 | Cg0923    | 1 | 715.4302  | 1.0  | 20    | 26  | 0  | 29.5  | 27 | V | LMIGGII                             | G | 2.6   | 6.02  |              |
| 1068 | Cg0923    | 1 | 1295.7238 | -1.9 | 69    | 81  | 0  | 30.1  | 26 | A | NAFGIPNPLIGIA                       | G | 1.0   | 6.02  |              |
| 1076 | Cg0879    | 1 | 715.4302  | 1.0  | 92    | 97  | 0  | 39.8  | 27 | V | MLNIIL                              | L | 2.5   | 6.02  |              |
| 1077 | Cg3116    | 1 | 725.4687  | -0.4 | 121   | 127 | 0  | 24.3  | 23 | K | LVTALPI                             | L | 2.3   | 6.02  |              |
| 1080 | Cg3316    | 1 | 713.4323  | 2.0  | 120   | 126 | 0  | 34.3  | 27 | E | ADLILG                              | S | 2.0   | 3.1   |              |
| 1087 | Cg0230    | 1 | 869.5222  | -0.3 | 411   | 419 | 0  | 34.2  | 27 | E | ADLVLVALG                           | F | 2.2   | 3.1   |              |
| 1090 | Cg3264    | 3 | 1759.7748 | -1.6 | 275   | 291 | 0  | 40.7  | 24 | A | SPEADAPEASADESEKK                   | - | -1.6  | 3.82  |              |
| 1101 | Cg1226    | 1 | 787.4076  | 4.7  | 76    | 82  | 0  | 38.5  | 31 | A | IDISINN                             | E | 0.3   | 3.1   |              |
| 1104 | Cg0001    | 2 | 1503.7827 | -0.4 | 493   | 504 | 0  | 29.7  | 29 | Y | ADRKIRQEMTEK                        | R | -1.9  | 9.88  |              |
| 1107 | Cg1002    | 1 | 624.3847  | 0.3  | 136   | 141 | 0  | 23.7  | 18 | E | PSVIPL                              | L | 1.4   | 6.02  |              |
| 1112 | Cg2127    | 2 | 1099.6125 | 0.7  | 88    | 97  | 0  | 33.5  | 28 | I | NDVLSLVDII                          | D | 1.4   | 2.92  |              |
| 1117 | Cg2049    | 1 | 532.2646  | 0.8  | 11    | 15  | 0  | 32.2  | 29 | H | GWGIT                               | Q | 0.4   | 6.02  |              |
| 1122 | Cg1741    | 1 | 1100.539  | -1.1 | 18    | 26  | 0  | 38.6  | 28 | A | DWLDLPTL                            | R | -0.3  | 2.88  |              |
| 1122 | Cg1741    | 2 | 1421.7191 | 0.8  | 15    | 26  | 0  | 34.5  | 29 | S | LHADWLDLPTL                         | R | 0.0   | 3.7   |              |

| hit  | accession | z | mass      | ppm  | start | end | mc | score | id | - | sequence                             | + | gravy | pl    | modification  |
|------|-----------|---|-----------|------|-------|-----|----|-------|----|---|--------------------------------------|---|-------|-------|---------------|
| 1122 | Cg1741    | 1 | 1783.9509 | -1.7 | 18    | 32  | 0  | 45.3  | 29 | A | DWLDLPTELRFPVIA                      | V | 0.3   | 3.7   |               |
| 1123 | Cg3399    | 1 | 933.4596  | 0.9  | 3     | 10  | 0  | 38.4  | 27 | A | VDFPNPV                              | N | 0.5   | 3.1   |               |
| 1123 | Cg3399    | 1 | 1004.4968 | 0.6  | 2     | 10  | 0  | 37.9  | 29 | M | AVDFPNPV                             | N | 0.6   | 3.1   |               |
| 1129 | Cg3025    | 1 | 688.4523  | 0.1  | 5     | 10  | 0  | 28.6  | 21 | N | LFLLA                                | A | 3.3   | 6.02  |               |
| 1134 | Cg0970    | 1 | 678.3775  | -0.1 | 27    | 32  | 0  | 23.3  | 23 | I | IACIFI                               | V | 3.4   | 5.32  |               |
| 1137 | Cg0432    | 1 | 553.3839  | 1.3  | 104   | 108 | 0  | 24.5  | 24 | T | ILVLP                                | D | 2.9   | 6.02  |               |
| 1141 | Cg0523    | 1 | 837.5324  | 0.7  | 31    | 39  | 0  | 22.6  | 22 | A | IAAIPGALL                            | P | 2.2   | 6.02  |               |
| 1145 | Cg2510    | 1 | 598.4418  | 1.7  | 300   | 304 | 0  | 28.1  | 17 | D | IIKIL                                | G | 2.7   | 10.1  |               |
| 1147 | Cg1799    | 1 | 656.3745  | 1.2  | 156   | 161 | 0  | 27.1  | 26 | F | EVSLIP                               | T | 1.1   | 3.3   |               |
| 1151 | Cg2114    | 1 | 956.4927  | 2.8  | 54    | 62  | 0  | 34.2  | 29 | P | PSIREIGDA                            | A | -0.4  | 4.08  |               |
| 1156 | Cg2410    | 1 | 624.3847  | 1.8  | 349   | 354 | 0  | 18.6  | 17 | D | PSLVPL                               | Y | 1.3   | 6.02  |               |
| 1159 | Cg2650    | 1 | 785.4687  | 4.3  | 94    | 99  | 0  | 35.7  | 29 | A | WILLEI                               | I | 2.0   | 3.3   |               |
| 1166 | Cg1051    | 1 | 799.415   | -0.1 | 1     | 7   | 0  | 28.8  | 27 | - | MEIPLPT                              | S | 0.4   | 3.3   |               |
| 1167 | Cg0401    | 1 | 689.4146  | -3.5 | 1     | 6   | 0  | 34.7  | 27 | - | MKGIL                                | A | 1.7   | 10.1  | Oxidation (M) |
| 1172 | Cg2936    | 1 | 672.4058  | 2.8  | 112   | 117 | 0  | 28.8  | 24 | E | ILDLSL                               | G | 1.9   | 3.1   |               |
| 1176 | Cg1129    | 1 | 700.3756  | 0.4  | 202   | 208 | 0  | 32.9  | 31 | I | QVAVDAV                              | Q | 1.3   | 3.1   |               |
| 1180 | Cg2402    | 1 | 1150.5506 | -0.7 | 155   | 165 | 0  | 47.6  | 29 | V | AYS DLQAGDIV                         | A | 0.3   | 2.92  |               |
| 1185 | Cg2554    | 1 | 539.3683  | -0.2 | 107   | 111 | 0  | 26.5  | 23 | N | IVVIP                                | G | 3.2   | 6.02  |               |
| 1186 | Cg2286    | 1 | 1082.7103 | -1.8 | 3     | 12  | 0  | 22.1  | 18 | N | ILFIPILAAL                           | I | 3.0   | 6.02  |               |
| 1187 | Cg2482    | 1 | 846.4884  | 0.5  | 108   | 114 | 0  | 34.8  | 27 | R | MKITLIE                              | P | 0.9   | 6.94  |               |
| 1194 | Cg2973    | 1 | 650.3024  | 0.0  | 274   | 279 | 0  | 29.3  | 25 | L | NQGYAV                               | L | -0.5  | 5.92  |               |
| 1194 | Cg2973    | 1 | 690.3952  | 0.7  | 138   | 143 | 0  | 26.1  | 26 | T | FLDIAL                               | D | 2.2   | 3.1   |               |
| 1199 | Cg2664    | 1 | 717.4095  | -2.9 | 189   | 194 | 0  | 29.6  | 29 | D | VEIVKM                               | L | 1.2   | 6.94  |               |
| 1202 | Cg2457    | 2 | 882.5287  | 1.5  | 120   | 128 | 0  | 26.1  | 25 | L | VGITAGRPI                            | A | 0.8   | 11.04 |               |
| 1202 | Cg2457    | 2 | 1066.6499 | 0.8  | 119   | 129 | 0  | 25.2  | 22 | E | LVGITAGRPIA                          | T | 1.2   | 11.04 |               |
| 1203 | Cg2429    | 2 | 723.3803  | 2.4  | 118   | 124 | 0  | 26.9  | 26 | Q | YLASTGI                              | A | 1.0   | 5.92  |               |
| 1205 | Cg1355    | 1 | 718.3571  | -1.1 | 106   | 111 | 0  | 27.8  | 25 | E | DIVMEI                               | K | 1.4   | 3     |               |
| 1211 | Cg2022    | 1 | 829.4294  | 4.9  | 303   | 310 | 0  | 33.4  | 31 | R | GDRIEGLA                             | S | -0.3  | 4.08  |               |
| 1215 | Cg2318    | 1 | 1979.9364 | -1.5 | 111   | 128 | 0  | 61.5  | 28 | L | SGFTPNVESILDYDPDLV                   | V | -0.1  | 2.78  |               |
| 1219 | Cg2271    | 1 | 688.4523  | 0.1  | 173   | 178 | 0  | 28.6  | 21 | C | FIILLA                               | L | 3.5   | 6.02  |               |
| 1221 | Cg0352    | 1 | 567.3057  | 0.4  | 18    | 22  | 0  | 25.6  | 19 | M | LFAFA                                | M | 2.6   | 6.02  |               |
| 1223 | Cg0310    | 2 | 1556.8311 | 0.5  | 40    | 54  | 0  | 43.8  | 29 | T | AGPQQPNVLDIHLI                       | E | 0.1   | 4.94  |               |
| 1225 | Cg1881    | 1 | 642.3701  | -1.9 | 59    | 64  | 0  | 35.1  | 29 | A | NLNLVA                               | F | 1.1   | 6.02  |               |
| 1234 | Cg2348    | 2 | 1268.6725 | 0.1  | 60    | 71  | 0  | 28.5  | 27 | V | VVDPGTGDLQRL                         | Q | -0.2  | 3.88  |               |
| 1236 | Cg1568    | 1 | 730.4993  | 0.0  | 289   | 294 | 0  | 22.2  | 16 | L | FLLLLI                               | I | 3.8   | 6.02  |               |
| 1247 | Cg1494    | 2 | 3952.9194 | -1.6 | 101   | 136 | 0  | 46.3  | 31 | A | NTVDVDGTTWLPVSDMTPGSSLETWYSVNRFPVVAI | T | 0.1   | 3.5   |               |
| 1251 | Cg1733    | 1 | 955.5338  | 2.4  | 73    | 82  | 0  | 29.4  | 27 | I | LTLALSGPGQ                           | V | 0.6   | 6.02  |               |
| 1259 | Cg0649    | 2 | 2055.067  | -1.9 | 15    | 35  | 0  | 29.9  | 29 | T | AAELDAMQAAGEIVGKALQAV                | R | 0.6   | 3.82  |               |
| 1260 | Cg1190    | 1 | 680.4836  | 2.2  | 94    | 99  | 0  | 23.9  | 15 | D | LIILLP                               | D | 3.1   | 6.02  |               |
| 1260 | Cg1190    | 1 | 698.4578  | 1.0  | 93    | 98  | 0  | 28.2  | 22 | G | DLIILL                               | P | 2.8   | 3.1   |               |

| hit  | accession | z | mass      | ppm  | start | end | mc | score | id | - | sequence              | + | gravy | pl   | modification |
|------|-----------|---|-----------|------|-------|-----|----|-------|----|---|-----------------------|---|-------|------|--------------|
| 1262 | Cg2000    | 1 | 794.5266  | 0.0  | 121   | 128 | 0  | 21.5  | 21 | Y | ALLIPGLV              | Y | 2.5   | 6.02 |              |
| 1263 | Cg1158    | 2 | 2301.1124 | -2.8 | 169   | 189 | 0  | 29.9  | 29 | A | ATDEEFNDLLRAVANSEPLPT | N | -0.5  | 3.5  |              |
| 1267 | Cg2128    | 1 | 601.3873  | 0.8  | 26    | 30  | 0  | 22.9  | 16 | C | IMLIL                 | W | 3.7   | 6.02 |              |
| 1267 | Cg2128    | 1 | 836.5735  | -0.5 | 16    | 23  | 0  | 34.5  | 18 | K | LPLIVIGL              | C | 2.8   | 6.02 |              |
| 1269 | Cg1859    | 2 | 1763.8577 | -1.3 | 79    | 95  | 0  | 47.1  | 29 | V | KVIAGEAESFTSDNLPS     | G | -0.2  | 3.82 |              |
| 1270 | Cg3099    | 2 | 1246.5425 | -1.5 | 23    | 34  | 0  | 27.5  | 25 | T | SADRAEQAAEEA          | A | -1.2  | 3.68 |              |
| 1275 | Cg3366    | 2 | 771.449   | 0.0  | 141   | 147 | 0  | 35.4  | 30 | I | QAILEKA               | A | 0.1   | 6.94 |              |
| 1275 | Cg3366    | 1 | 1025.587  | -0.4 | 239   | 248 | 0  | 37.0  | 26 | A | RTLGDVGIPV            | H | 0.6   | 6.78 |              |
| 1275 | Cg3366    | 1 | 1119.5812 | -1.8 | 50    | 59  | 0  | 29.4  | 29 | A | SVEEKGPYIV            | V | -0.2  | 4.26 |              |
| 1280 | Cg2186    | 1 | 553.3839  | 1.3  | 2     | 6   | 0  | 24.5  | 24 | M | LIVLP                 | P | 2.9   | 6.02 |              |
| 1280 | Cg2186    | 1 | 684.4244  | -4.4 | 1     | 6   | 0  | 24.8  | 18 | - | MLIVLP                | P | 2.8   | 6.02 |              |
| 1288 | Cg2226    | 1 | 688.4523  | 0.1  | 368   | 373 | 0  | 28.6  | 21 | T | IFLLIA                | L | 3.5   | 6.02 |              |
| 1290 | Cg0786    | 1 | 553.3839  | 1.3  | 71    | 75  | 0  | 24.5  | 24 | P | IIVPI                 | I | 3.2   | 6.02 |              |
| 1301 | Cg0353    | 1 | 671.3854  | 0.6  | 115   | 121 | 0  | 39.2  | 31 | L | IGLGEAL               | I | 1.4   | 3.3  |              |
| 1303 | Cg1300    | 1 | 782.5266  | 1.3  | 228   | 235 | 0  | 32.7  | 25 | I | LAVLIIAA              | V | 3.3   | 6.02 |              |
| 1313 | Cg0899    | 1 | 867.5065  | 0.0  | 61    | 68  | 0  | 27.8  | 24 | V | VEPLANLI              | R | 1.2   | 3.3  |              |
| 1317 | Cg0237    | 2 | 1585.726  | -0.2 | 63    | 77  | 0  | 86.4  | 27 | V | AVVDFDALDTESHPA       | A | 0.0   | 3.5  |              |
| 1318 | Cg3172    | 2 | 726.4276  | 2.5  | 170   | 176 | 0  | 29.3  | 28 | R | IIQSGPL               | N | 0.9   | 6.02 |              |
| 1322 | Cg2517    | 1 | 980.6019  | 4.1  | 323   | 331 | 0  | 25.6  | 22 | R | LKQGVPLNL             | F | 0.3   | 10.1 |              |
| 1327 | Cg1738    | 1 | 773.4171  | -2.1 | 174   | 180 | 0  | 40.5  | 29 | L | SEVLDLV               | E | 1.2   | 3    |              |
| 1332 | Cg0596    | 2 | 1101.603  | 0.5  | 2     | 11  | 0  | 31.6  | 28 | M | TNLKLDVQTA            | D | -0.2  | 6.76 |              |
| 1337 | Cg2428    | 2 | 1813.8271 | -2.2 | 17    | 32  | 0  | 28.4  | 26 | A | DFDDPDAPGRWPGEKL      | G | -1.5  | 3.76 |              |
| 1340 | Cg0721    | 1 | 642.3952  | 1.2  | 151   | 156 | 0  | 43.8  | 27 | A | EVIGLL                | C | 2.1   | 3.3  |              |
| 1341 | Cg0355    | 1 | 820.3351  | -1.1 | 236   | 241 | 0  | 31.3  | 19 | T | EWDTDR                | I | -2.8  | 3.7  |              |
| 1341 | Cg0355    | 1 | 858.4083  | 4.7  | 25    | 32  | 0  | 33.2  | 28 | P | GQNTLTP               | A | -1.3  | 3.3  |              |
| 1343 | Cg2977    | 1 | 1097.4877 | -1.2 | 199   | 209 | 0  | 29.9  | 26 | V | AVEAEEEPAPG           | R | -0.7  | 2.96 |              |
| 1345 | Cg0046    | 1 | 598.4418  | 1.7  | 46    | 50  | 0  | 28.1  | 17 | T | LIKIL                 | S | 2.5   | 10.1 |              |
| 1346 | Cg1811    | 1 | 1009.6172 | -1.0 | 59    | 68  | 0  | 24.3  | 23 | S | ALLEALPKVG            | K | 1.0   | 6.94 |              |
| 1350 | Cg0548    | 1 | 642.3701  | -1.9 | 233   | 239 | 0  | 33.4  | 29 | M | GAVNIVA               | D | 1.8   | 6.02 |              |
| 1354 | Cg1180    | 1 | 715.4302  | 1.0  | 21    | 27  | 0  | 39.8  | 27 | A | GMGILL                | W | 2.4   | 6.02 |              |
| 1370 | Cg0330    | 1 | 767.5157  | 0.9  | 74    | 80  | 0  | 20.2  | 19 | T | LPIIVLT               | A | 2.6   | 6.02 |              |
| 1371 | Cg3338    | 1 | 667.333   | 1.5  | 81    | 86  | 0  | 23.2  | 22 | E | LFNGFA                | D | 1.2   | 6.02 |              |
| 1371 | Cg3338    | 1 | 1938.9575 | 0.1  | 149   | 167 | 0  | 45.8  | 29 | I | GYSVDVDDLFFNTIGGLIGA  | S | 0.6   | 2.82 |              |
| 1372 | Cg3317    | 2 | 1706.7384 | -0.6 | 10    | 24  | 0  | 32.6  | 24 | M | NTQPEHPENDLVDEA       | D | -1.7  | 3.5  |              |
| 1375 | Cg0562    | 1 | 704.4109  | 2.1  | 154   | 159 | 0  | 40.5  | 23 | D | IFEVVV                | P | 2.7   | 3.3  |              |
| 1378 | Cg0128    | 1 | 943.4862  | -0.8 | 97    | 104 | 0  | 28.3  | 28 | G | QEVLELDV              | T | 0.3   | 2.94 |              |
| 1381 | Cg0696    | 1 | 1627.8053 | -3.9 | 2     | 16  | 0  | 54.8  | 29 | M | ADTERELADLVPQAT       | A | -0.5  | 3.58 |              |
| 1397 | Cg1056    | 1 | 725.4687  | -0.4 | 161   | 167 | 0  | 24.3  | 23 | T | LALSPLI               | I | 2.2   | 6.02 |              |
| 1398 | Cg2099    | 1 | 704.4473  | 0.6  | 80    | 85  | 0  | 22.7  | 22 | L | SIIFI                 | I | 3.3   | 6.02 |              |
| 1402 | Cg3214    | 1 | 648.3483  | 1.2  | 96    | 101 | 0  | 42.8  | 31 | K | DLAFAL                | N | 1.8   | 3.1  |              |

| hit  | accession | z | mass      | ppm  | start | end | mc | score | id | - | sequence          | + | gravy | pl    | modification  |
|------|-----------|---|-----------|------|-------|-----|----|-------|----|---|-------------------|---|-------|-------|---------------|
| 1407 | Cg0684    | 1 | 885.5324  | -1.1 | 390   | 397 | 0  | 31.2  | 29 | H | LPGVQLFI          | T | 1.7   | 6.02  |               |
| 1414 | Cg1405    | 1 | 855.4015  | -1.5 | 97    | 103 | 0  | 28.6  | 25 | G | TFDIDFV           | A | 0.9   | 2.92  |               |
| 1418 | Cg1242    | 1 | 617.4152  | -0.5 | 109   | 113 | 0  | 25.8  | 21 | F | FLILI             | G | 3.9   | 6.02  |               |
| 1419 | Cg2010    | 1 | 630.3775  | -4.8 | 103   | 108 | 0  | 27.2  | 27 | I | GLCILI            | V | 3.1   | 5.32  |               |
| 1419 | Cg2010    | 1 | 678.3775  | -1.5 | 97    | 102 | 0  | 27.0  | 23 | L | MVGLFI            | G | 2.8   | 6.02  |               |
| 1421 | Cg1260    | 1 | 656.3745  | -0.5 | 78    | 83  | 0  | 27.8  | 27 | H | IDTVPI            | A | 1.2   | 3.1   |               |
| 1429 | Cg0602    | 2 | 1693.9515 | -1.1 | 67    | 81  | 0  | 40.4  | 25 | I | NIFPDRPLTQKPLGV   | R | -0.4  | 10.08 |               |
| 1430 | Cg3299    | 1 | 657.3697  | 0.5  | 69    | 74  | 0  | 38.0  | 32 | Q | IQSIPT            | L | 0.4   | 6.02  |               |
| 1431 | Cg2578    | 1 | 656.3745  | -0.5 | 166   | 171 | 0  | 27.6  | 27 | A | DLVTLP            | G | 1.0   | 3.1   |               |
| 1433 | Cg1236    | 2 | 1731.8679 | 0.9  | 114   | 130 | 0  | 56.8  | 29 | S | TFGEDNGIVLEGSPLKG | L | -0.2  | 3.82  |               |
| 1437 | Cg1291    | 2 | 915.4847  | -2.5 | 51    | 60  | 0  | 27.2  | 27 | G | AMLANAAAAL        | F | 1.7   | 6.02  |               |
| 1442 | Cg2625    | 1 | 1566.8869 | -0.2 | 26    | 40  | 0  | 25.3  | 25 | G | VPVEELATTVINAIV   | E | 1.3   | 3.12  |               |
| 1447 | Cg3211    | 1 | 532.2646  | 1.1  | 129   | 133 | 0  | 30.8  | 29 | D | GTWGI             | S | 0.4   | 6.02  |               |
| 1456 | Cg1490    | 1 | 902.4605  | 0.2  | 208   | 215 | 0  | 33.8  | 29 | Q | AEMLVPML          | L | 1.5   | 3.3   |               |
| 1459 | Cg2935    | 1 | 971.4811  | -1.3 | 304   | 312 | 0  | 27.3  | 26 | R | IDEPISDAI         | S | 0.3   | 2.88  |               |
| 1462 | Cg2620    | 1 | 553.3839  | 1.3  | 384   | 388 | 0  | 24.5  | 24 | E | ILVPI             | M | 3.1   | 6.02  |               |
| 1462 | Cg2620    | 1 | 598.4418  | 1.7  | 217   | 221 | 0  | 28.1  | 17 | A | LLKIL             | E | 2.4   | 10.1  |               |
| 1464 | Cg3308    | 1 | 601.3873  | 0.8  | 6     | 10  | 0  | 22.9  | 16 | E | LMIIL             | D | 3.7   | 6.02  |               |
| 1464 | Cg3308    | 1 | 924.4626  | 0.4  | 3     | 9   | 0  | 32.1  | 27 | R | QYELMII           | L | 0.9   | 3.3   | Oxidation (M) |
| 1467 | Cg0153    | 1 | 755.3701  | 0.3  | 235   | 241 | 0  | 27.3  | 22 | S | DLSDLPP           | T | -0.5  | 2.92  |               |
| 1468 | Cg1176    | 2 | 1109.6332 | 1.5  | 77    | 87  | 0  | 26.8  | 24 | G | IDVVVIEPGGI       | A | 1.5   | 3     |               |
| 1476 | Cg0154    | 1 | 676.416   | 1.2  | 11    | 16  | 0  | 40.4  | 25 | D | LYGVLI            | K | 2.4   | 5.92  |               |
| 1479 | Cg0650    | 1 | 1057.5516 | -1.4 | 61    | 69  | 0  | 30.9  | 27 | T | RNTIQDQLA         | S | -1.0  | 6.78  |               |
| 1488 | Cg1675    | 1 | 599.3894  | 1.5  | 11    | 15  | 0  | 30.2  | 19 | F | IIEIL             | A | 2.8   | 3.3   |               |
| 1498 | Cg0156    | 1 | 579.338   | 2.6  | 352   | 356 | 0  | 22.2  | 21 | R | LIPTH             | R | 0.6   | 7.84  |               |
| 1505 | Cg1206    | 1 | 1306.634  | 3.4  | 176   | 187 | 0  | 35.6  | 29 | L | MEQAGARSVYPV      | G | -0.1  | 6.88  |               |
| 1506 | Cg1842    | 2 | 1201.5687 | -1.2 | 219   | 229 | 0  | 33.9  | 28 | A | SAVGDDNIQQR       | S | -1.2  | 3.88  |               |
| 1508 | Cg1962    | 1 | 601.3873  | 0.8  | 94    | 98  | 0  | 22.9  | 16 | S | LMILI             | I | 3.7   | 6.02  |               |
| 1509 | Cg2952    | 2 | 931.3441  | 1.4  | 59    | 67  | 0  | 20.2  | 15 | S | SMESSTSS          | S | -0.8  | 3.3   | Oxidation (M) |
| 1523 | Cg0946    | 1 | 489.2587  | 0.2  | 75    | 79  | 0  | 31.3  | 29 | A | GFPPI             | T | 1.0   | 6.02  |               |
| 1532 | Cg2567    | 1 | 640.416   | 2.0  | 72    | 77  | 0  | 31.4  | 23 | P | LSVIPI            | E | 2.4   | 6.02  |               |
| 1534 | Cg2806    | 1 | 786.4851  | -0.6 | 42    | 49  | 0  | 29.7  | 27 | F | AVSLITAL          | V | 2.3   | 6.02  |               |
| 1534 | Cg2806    | 1 | 995.4811  | -0.6 | 26    | 34  | 0  | 31.9  | 26 | W | SPITSESYL         | E | -0.1  | 3.3   |               |
| 1539 | Cg0109    | 1 | 641.3748  | 1.2  | 196   | 202 | 0  | 45.0  | 29 | M | GGIVSPL           | I | 1.3   | 6.02  |               |
| 1542 | Cg3209    | 1 | 666.468   | 0.3  | 137   | 142 | 0  | 19.9  | 19 | E | IPVLLI            | W | 3.2   | 6.02  |               |
| 1547 | Cg0620    | 2 | 1366.5524 | -2.9 | 53    | 65  | 0  | 54.6  | 18 | V | DYGADSEKEPEGA     | C | -1.7  | 3.5   |               |
| 1549 | Cg2134    | 1 | 664.3584  | 2.1  | 33    | 37  | 0  | 25.1  | 24 | K | WYLIA             | G | 1.6   | 5.92  |               |
| 1550 | Cg2350    | 1 | 1000.4349 | -0.4 | 119   | 128 | 0  | 30.1  | 23 | A | GIEEAPAEEG        | A | -0.8  | 2.96  |               |
| 1550 | Cg2350    | 2 | 1297.6401 | -0.2 | 4     | 15  | 0  | 40.7  | 28 | V | ATDPEAPIEEKV      | K | -0.8  | 3.68  |               |
| 1565 | Cg3155    | 1 | 686.3275  | 1.2  | 122   | 127 | 0  | 25.4  | 22 | G | FSGYIT            | L | 0.7   | 5.92  |               |

| hit  | accession | z | mass      | ppm  | start | end | mc | score | id | - | sequence                 | + | gravy | pl    | modification  |
|------|-----------|---|-----------|------|-------|-----|----|-------|----|---|--------------------------|---|-------|-------|---------------|
| 1568 | Cg0680    | 1 | 532.2645  | 1.1  | 67    | 71  | 0  | 30.8  | 29 | L | ASWGI                    | A | 0.8   | 6.02  |               |
| 1571 | Cg1514    | 1 | 924.4626  | 0.4  | 122   | 129 | 0  | 27.9  | 27 | I | YISGLEML                 | S | 1.0   | 3.3   |               |
| 1572 | Cg3277    | 1 | 786.4851  | -0.6 | 100   | 107 | 0  | 52.4  | 27 | D | SAVLITIA                 | K | 2.4   | 6.02  |               |
| 1579 | Cg1370    | 1 | 767.3813  | -0.9 | 112   | 118 | 0  | 36.4  | 26 | I | ELALDAH                  | G | 0.1   | 4.06  |               |
| 1584 | Cg3249    | 1 | 1438.8031 | -2.2 | 171   | 183 | 0  | 39.4  | 26 | A | QLIAEEVIQNLGL            | - | 0.7   | 3.12  |               |
| 1585 | Cg2720    | 2 | 761.3344  | -4.9 | 224   | 231 | 0  | 26.1  | 26 | L | GGGVWGET                 | D | -0.3  | 3.3   |               |
| 1590 | Cg3280    | 2 | 2745.2724 | -1.6 | 197   | 220 | 0  | 85.0  | 27 | I | ALAEQVIEDQEAEIAEMEQMLNEL | - | -0.3  | 2.74  |               |
| 1605 | Cg0179    | 1 | 800.483   | -4.5 | 37    | 44  | 0  | 33.9  | 30 | G | CIVVAILA                 | L | 3.4   | 5.32  |               |
| 1617 | Cg3293    | 1 | 959.5175  | 0.2  | 84    | 92  | 0  | 31.8  | 29 | R | LDLSTLEAV                | D | 1.0   | 3     |               |
| 1634 | Cg0325    | 2 | 1303.5892 | -1.6 | 116   | 127 | 0  | 39.7  | 26 | R | SVTNPTDQEDKA             | - | -1.6  | 3.7   |               |
| 1643 | Cg0415    | 1 | 1169.604  | 3.3  | 151   | 160 | 0  | 33.4  | 28 | S | RSELNPLDNL               | A | -1.0  | 4.08  |               |
| 1645 | Cg1597    | 1 | 526.3115  | 0.8  | 103   | 108 | 0  | 30.6  | 30 | G | GPGLIA                   | V | 1.3   | 6.02  |               |
| 1649 | Cg1033    | 1 | 1031.6055 | -1.0 | 71    | 79  | 0  | 27.3  | 25 | A | IPYFGLIPL                | A | 1.6   | 5.92  |               |
| 1650 | Cg2623    | 2 | 1565.8638 | 1.3  | 104   | 119 | 0  | 29.6  | 26 | P | QGTLAERLRAGGAGIP         | A | -0.2  | 10.88 |               |
| 1662 | Cg0530    | 1 | 1201.7144 | -0.4 | 40    | 50  | 0  | 27.0  | 22 | A | LIVAFPLSMLV              | F | 2.6   | 6.02  |               |
| 1662 | Cg0530    | 1 | 1217.7094 | 1.3  | 40    | 50  | 0  | 25.8  | 24 | A | LIVAFPLSMLV              | F | 2.6   | 6.02  | Oxidation (M) |
| 1670 | Cg0795    | 2 | 953.4277  | 1.6  | 276   | 285 | 0  | 25.3  | 25 | M | AMVYGSAAQG               | V | 0.5   | 5.92  |               |
| 1675 | Cg0292    | 1 | 654.4064  | -0.5 | 56    | 61  | 0  | 24.2  | 23 | P | KPVLQA                   | V | 0.1   | 10.1  |               |
| 1681 | Cg1893    | 1 | 887.46    | -0.6 | 84    | 91  | 0  | 31.8  | 30 | S | ESVQLEIA                 | E | 0.4   | 3.12  |               |
| 1696 | Cg2113    | 1 | 632.3897  | -1.3 | 110   | 115 | 0  | 28.4  | 27 | V | IFAGIL                   | L | 2.8   | 6.02  |               |
| 1699 | Cg2315    | 1 | 844.4542  | -2.5 | 223   | 230 | 0  | 33.0  | 30 | Y | DATVIVEV                 | I | 1.4   | 3     |               |
| 1704 | Cg1130    | 1 | 690.3952  | -1.3 | 94    | 99  | 0  | 31.0  | 26 | L | LFDIIA                   | D | 2.3   | 3.1   |               |
| 1709 | Cg2207    | 1 | 747.4895  | -1.1 | 333   | 339 | 0  | 19.0  | 13 | N | LVPLPPL                  | D | 1.5   | 6.02  |               |
| 1710 | Cg0465    | 1 | 945.5688  | -3.5 | 103   | 110 | 0  | 27.0  | 23 | L | IWFLIAAI                 | S | 2.9   | 6.02  |               |
| 1712 | Cg2861    | 1 | 739.4632  | 1.6  | 180   | 185 | 0  | 21.8  | 15 | G | WLIVPL                   | V | 2.3   | 6.02  |               |
| 1720 | Cg1682    | 1 | 656.3897  | 0.0  | 93    | 98  | 0  | 20.1  | 15 | M | PLPLFA                   | D | 1.5   | 6.02  |               |
| 1728 | Cg3412    | 1 | 751.5207  | 0.9  | 19    | 25  | 0  | 20.0  | 17 | V | LIPAI                    | T | 3.1   | 6.02  |               |
| 1741 | Cg3223    | 1 | 672.4058  | 1.5  | 171   | 176 | 0  | 31.8  | 24 | R | LLDSL                    | T | 1.8   | 3.1   |               |
| 1748 | Cg2942    | 1 | 858.4269  | -0.2 | 31    | 38  | 0  | 29.7  | 28 | T | MPNKDIAA                 | K | -0.3  | 6.76  |               |
| 1750 | Cg1652    | 2 | 800.4643  | 1.1  | 189   | 195 | 0  | 29.4  | 29 | A | LDALEKI                  | E | 0.4   | 4.08  |               |
| 1751 | Cg1630    | 1 | 1002.4618 | -1.0 | 36    | 46  | 0  | 39.5  | 27 | A | STGAENLPAGS              | A | -0.4  | 3.3   |               |
| 1770 | Cg1884    | 2 | 2397.0972 | -2.0 | 35    | 56  | 0  | 47.6  | 26 | A | HDVVVDSNPENGSVDFEPETI    | E | -0.4  | 3.38  |               |
| 1771 | Cg2765    | 1 | 640.4523  | 0.3  | 12    | 17  | 0  | 30.8  | 25 | S | LIGLIL                   | I | 3.3   | 6.02  |               |
| 1783 | Cg2344    | 2 | 1417.7096 | -4.2 | 90    | 102 | 0  | 40.3  | 29 | H | CVVDSRANRNTIA            | H | -0.2  | 9     |               |
| 1801 | Cg3357    | 2 | 723.4279  | 2.2  | 30    | 36  | 0  | 26.2  | 23 | A | KLPGNPV                  | V | -0.4  | 10.1  |               |
| 1801 | Cg3357    | 1 | 891.3796  | 0.7  | 48    | 54  | 0  | 30.2  | 25 | S | QELWDMA                  | H | -0.6  | 3     |               |
| 1803 | Cg0852    | 1 | 509.3213  | -0.2 | 90    | 94  | 0  | 30.4  | 21 | V | IPPAI                    | D | 1.5   | 6.02  |               |
| 1823 | Cg2547    | 1 | 688.4523  | 0.1  | 92    | 97  | 0  | 24.4  | 21 | L | ILFIIA                   | G | 3.7   | 6.02  |               |
| 1823 | Cg2547    | 1 | 704.4473  | 0.6  | 90    | 95  | 0  | 22.7  | 22 | V | SLILFI                   | I | 3.1   | 6.02  |               |
| 1824 | Cg0240    | 2 | 2067.012  | -0.9 | 78    | 97  | 0  | 53.3  | 29 | I | RQEIGDLGVTPGPESDVDAI     | T | -0.4  | 3.42  |               |

| hit  | accession | z | mass      | ppm  | start | end | mc | score | id | - | sequence                        | + | gravy | pl    | modification  |
|------|-----------|---|-----------|------|-------|-----|----|-------|----|---|---------------------------------|---|-------|-------|---------------|
| 1827 | Cg1167    | 2 | 1170.588  | -0.7 | 49    | 58  | 0  | 73.2  | 28 | V | LIEQESERPA                      | T | -1.1  | 3.96  |               |
| 1832 | Cg1612    | 1 | 746.3884  | 1.9  | 178   | 183 | 0  | 40.8  | 28 | D | EILEML                          | K | 1.2   | 3.12  |               |
| 1833 | Cg3129    | 1 | 1198.6346 | 0.8  | 30    | 39  | 0  | 32.2  | 28 | H | EQPLEFRAPI                      | T | -0.5  | 4.26  |               |
| 1837 | Cg1834    | 1 | 699.4167  | 0.3  | 93    | 99  | 0  | 31.8  | 30 | V | ADLVLLG                         | R | 1.9   | 3.1   |               |
| 1840 | Cg1783    | 1 | 695.4218  | 1.9  | 206   | 212 | 0  | 22.4  | 21 | L | VPSIAPL                         | L | 1.5   | 6.02  |               |
| 1846 | Cg2053    | 1 | 676.3948  | 0.0  | 68    | 72  | 0  | 25.6  | 19 | L | FWIVI                           | S | 3.0   | 6.02  |               |
| 1847 | Cg3139    | 2 | 1973.9847 | -2.6 | 9     | 26  | 0  | 47.7  | 30 | L | RLDPAVYDAIKWAADEA               | R | -0.2  | 3.96  |               |
| 1866 | Cg1348    | 1 | 704.4473  | 0.6  | 106   | 111 | 0  | 22.7  | 22 | F | ILSLFI                          | V | 3.1   | 6.02  |               |
| 1871 | Cg3345    | 1 | 747.3262  | 1.5  | 157   | 162 | 0  | 29.0  | 27 | I | PWDMIA                          | N | 0.4   | 3.1   | Oxidation (M) |
| 1875 | Cg0374    | 1 | 656.3931  | -4.4 | 58    | 63  | 0  | 25.4  | 20 | T | LMPLLA                          | G | 2.3   | 6.02  |               |
| 1879 | Cg3127    | 1 | 803.4429  | 0.5  | 141   | 147 | 0  | 26.7  | 25 | E | FDIITVP                         | A | 1.5   | 3.1   |               |
| 1886 | Cg0599    | 2 | 1832.8767 | -1.0 | 61    | 77  | 0  | 56.6  | 29 | V | FVDDAMVGHKLGEFAPT               | K | 0.2   | 4.3   |               |
| 1892 | Cg3324    | 1 | 1548.7824 | -2.0 | 89    | 102 | 0  | 32.3  | 29 | V | NIADPAPWEVVEPI                  | N | 0.1   | 2.94  |               |
| 1900 | Cg3331    | 1 | 656.3897  | 0.0  | 122   | 127 | 0  | 20.1  | 15 | N | PLPIFA                          | P | 1.6   | 6.02  |               |
| 1901 | Cg0337    | 1 | 532.2646  | 0.2  | 82    | 86  | 0  | 35.2  | 29 | V | WGGLT                           | E | 0.3   | 6.02  |               |
| 1902 | Cg2607    | 1 | 688.4523  | 0.1  | 111   | 116 | 0  | 24.4  | 21 | A | IIFIIA                          | W | 3.8   | 6.02  |               |
| 1904 | Cg1796    | 2 | 1150.5255 | -0.6 | 167   | 176 | 0  | 31.0  | 27 | A | FQSRDGEDVV                      | R | -0.9  | 3.7   |               |
| 1907 | Cg1706    | 1 | 642.3701  | -1.9 | 129   | 134 | 0  | 35.1  | 29 | R | VQNLVA                          | E | 1.2   | 6.02  |               |
| 1911 | Cg3052    | 2 | 1035.5237 | 1.5  | 306   | 315 | 0  | 37.1  | 29 | S | YLLANGVSAE                      | F | 0.6   | 3.3   |               |
| 1925 | Cg1326    | 1 | 557.3247  | -0.7 | 69    | 73  | 0  | 27.7  | 19 | Q | VMIPV                           | I | 2.6   | 6.02  |               |
| 1930 | Cg1874    | 1 | 583.4309  | -0.2 | 127   | 131 | 0  | 24.1  | 18 | S | ILILL                           | V | 4.1   | 6.02  |               |
| 1937 | Cg2824    | 2 | 668.3969  | -0.1 | 88    | 93  | 0  | 25.1  | 24 | V | RILNPG                          | G | -0.3  | 11.04 |               |
| 1949 | Cg2981    | 1 | 834.4487  | -1.0 | 53    | 60  | 0  | 33.1  | 28 | V | DYGALALL                        | V | 1.2   | 3.1   |               |
| 1954 | Cg2121    | 2 | 1351.5263 | -0.7 | 37    | 49  | 0  | 27.2  | 17 | T | LVGSDDDEETDAS                   | S | -1.1  | 2.7   |               |
| 1959 | Cg2785    | 2 | 1009.6535 | 1.6  | 60    | 70  | 0  | 25.0  | 21 | S | GALAVALLALV                     | A | 2.8   | 6.02  |               |
| 1991 | Cg3105    | 1 | 583.4309  | -0.2 | 106   | 110 | 0  | 24.1  | 18 | L | IILIL                           | R | 4.2   | 6.02  |               |
| 1993 | Cg1181    | 1 | 775.4844  | 0.9  | 183   | 189 | 0  | 24.6  | 23 | Y | FAVIIIIT                        | F | 3.1   | 6.02  |               |
| 1998 | Cg2572    | 1 | 640.4523  | 0.3  | 130   | 135 | 0  | 30.8  | 25 | A | ILGLLI                          | S | 3.3   | 6.02  |               |
| 2001 | Cg0983    | 2 | 882.4923  | 0.9  | 164   | 171 | 0  | 26.4  | 26 | Q | RAVPVEVN                        | D | 0.2   | 6.98  |               |
| 2036 | Cg1804    | 1 | 767.3814  | 4.0  | 138   | 144 | 0  | 28.2  | 27 | T | DHLDGVL                         | F | 0.2   | 3.88  |               |
| 2048 | Cg2582    | 1 | 1064.539  | 0.6  | 115   | 123 | 0  | 28.3  | 28 | I | EIEGLETFK                       | R | -0.5  | 3.96  |               |
| 2049 | Cg3257    | 1 | 950.5113  | -0.8 | 29    | 36  | 0  | 33.3  | 27 | T | LFDLLFPS                        | N | 1.4   | 3.1   |               |
| 2051 | Cg2839    | 1 | 870.5062  | 0.2  | 223   | 230 | 0  | 33.0  | 27 | L | LTPVELSL                        | R | 1.1   | 3.3   |               |
| 2078 | Cg1469    | 1 | 632.3897  | -1.3 | 11    | 16  | 0  | 29.0  | 27 | L | FIALGL                          | V | 2.7   | 6.02  |               |
| 2110 | Cg2033    | 2 | 715.448   | 1.7  | 9     | 15  | 0  | 29.2  | 25 | A | LLAVSTL                         | M | 2.3   | 6.02  |               |
| 2119 | Cg2850    | 1 | 577.3475  | 2.3  | 195   | 199 | 0  | 28.1  | 28 | R | LYGLL                           | P | 1.9   | 5.92  |               |
| 2120 | Cg0246    | 1 | 710.3792  | -1.3 | 283   | 287 | 0  | 24.2  | 21 | A | WFFLV                           | Q | 2.5   | 6.02  |               |
| 2123 | Cg0500    | 1 | 1122.6649 | -0.3 | 88    | 98  | 0  | 22.2  | 22 | H | LITSINIGVPP                     | G | 1.2   | 6.02  |               |
| 2137 | Cg0297    | 1 | 770.4538  | -0.3 | 69    | 75  | 0  | 30.0  | 29 | T | LQDLLLG                         | A | 1.1   | 3.1   |               |
| 2138 | Cg0107    | 3 | 3416.8748 | -0.4 | 156   | 186 | 0  | 30.6  | 28 | T | FTIEVPGVGGVQLPDLYQIVQQFLAQFGIKI | - | 0.7   | 4.08  |               |

| hit  | accession | z | mass      | ppm  | start | end | mc | score | id | - | sequence            | + | gravy | pl    | modification  |
|------|-----------|---|-----------|------|-------|-----|----|-------|----|---|---------------------|---|-------|-------|---------------|
| 2148 | Cg3110    | 1 | 598.4418  | 1.7  | 39    | 43  | 0  | 28.1  | 17 | H | IIKLL               | V | 2.5   | 10.1  |               |
| 2162 | Cg0582    | 1 | 1625.8373 | -1.2 | 117   | 132 | 0  | 31.0  | 29 | I | ERLANELLDAANGLGA    | S | 0.0   | 3.82  |               |
| 2163 | Cg1635    | 2 | 1615.7002 | 1.2  | 27    | 40  | 0  | 26.1  | 24 | A | DGYLDIDEFDTRTG      | A | -1.0  | 3.36  |               |
| 2191 | Cg3423    | 2 | 990.4618  | -0.5 | 57    | 65  | 0  | 34.5  | 28 | A | SVDVDAERT           | L | -0.7  | 3.7   |               |
| 2202 | Cg1085    | 1 | 763.3323  | -0.3 | 17    | 22  | 0  | 36.3  | 25 | N | NWVNMT              | G | -0.4  | 6.02  |               |
| 2223 | Cg1894    | 1 | 726.3225  | -1.7 | 151   | 156 | 0  | 25.3  | 24 | K | AFDDFL              | H | 0.7   | 2.92  |               |
| 2225 | Cg0588    | 1 | 1093.7111 | -2.1 | 232   | 241 | 0  | 19.3  | 19 | E | LGVLEKIIPL          | E | 1.5   | 6.94  |               |
| 2232 | Cg1072    | 1 | 957.5019  | -0.8 | 62    | 70  | 0  | 35.8  | 28 | N | AVLELDIEG           | Q | 0.8   | 2.94  |               |
| 2239 | Cg0155    | 1 | 679.4268  | -1.2 | 4     | 9   | 0  | 25.0  | 21 | P | QPLILP              | F | 0.9   | 6.02  |               |
| 2249 | Cg0612    | 1 | 585.3737  | 1.5  | 94    | 98  | 0  | 27.8  | 25 | I | DLLLI               | H | 2.5   | 3.1   |               |
| 2249 | Cg0612    | 1 | 698.4578  | 1.0  | 93    | 98  | 0  | 28.2  | 22 | Y | IDLLLI              | H | 2.8   | 3.1   |               |
| 2271 | Cg2443    | 1 | 630.3775  | -4.8 | 120   | 125 | 0  | 27.2  | 27 | L | AVCLLL              | Q | 3.3   | 5.32  |               |
| 2281 | Cg2996    | 1 | 674.4367  | 1.5  | 2     | 7   | 0  | 24.6  | 24 | M | FLAVIL              | A | 3.5   | 6.02  |               |
| 2292 | Cg1241    | 1 | 639.3268  | 0.6  | 42    | 46  | 0  | 25.2  | 23 | T | FDVFL               | N | 2.0   | 3.1   |               |
| 2295 | Cg1708    | 2 | 2116.9841 | -2.0 | 6     | 24  | 0  | 38.8  | 27 | A | TFQPSVDEFISTLEEFATG | S | 0.0   | 2.88  |               |
| 2301 | Cg2340    | 1 | 667.3945  | -0.7 | 10    | 14  | 0  | 23.2  | 15 | A | FYIII               | C | 3.0   | 5.92  |               |
| 2331 | Cg2071    | 1 | 635.3716  | -4.9 | 221   | 225 | 0  | 20.5  | 19 | S | MFILI               | A | 3.5   | 6.02  |               |
| 2331 | Cg2071    | 1 | 651.3666  | 0.6  | 221   | 225 | 0  | 24.1  | 17 | S | MFILI               | A | 3.5   | 6.02  | Oxidation (M) |
| 2336 | Cg0358    | 1 | 666.468   | 0.3  | 72    | 77  | 0  | 19.9  | 19 | K | PLVLLI              | H | 3.1   | 6.02  |               |
| 2346 | Cg3267    | 1 | 676.3948  | 0.0  | 23    | 27  | 0  | 25.6  | 19 | L | FWIVL               | S | 2.9   | 6.02  |               |
| 2435 | Cg0321    | 1 | 864.6048  | -0.9 | 48    | 55  | 0  | 20.8  | 13 | I | PLLIALL             | I | 3.1   | 6.02  |               |
| 2443 | Cg1201    | 1 | 545.3247  | 2.0  | 36    | 40  | 0  | 29.9  | 28 | S | LMVLA               | G | 3.1   | 6.02  |               |
| 2447 | Cg0366    | 1 | 949.5307  | -3.1 | 36    | 44  | 0  | 29.0  | 28 | A | ALAAVLYMV           | V | 2.4   | 5.92  |               |
| 2457 | Cg0087    | 1 | 1355.8249 | -4.2 | 64    | 76  | 0  | 29.4  | 23 | K | RVITRVSAGLTLA       | I | 1.0   | 12.4  |               |
| 2468 | Cg3433    | 1 | 678.3775  | -0.1 | 2     | 7   | 0  | 23.3  | 23 | M | LCAIFI              | V | 3.3   | 5.32  |               |
| 2497 | Cg2710    | 1 | 888.3614  | -0.7 | 166   | 173 | 0  | 21.1  | 21 | R | PWDATNAD            | D | -1.3  | 2.92  |               |
| 2632 | Cg0380    | 2 | 668.397   | -0.1 | 46    | 51  | 0  | 30.6  | 24 | G | RLPQVG              | I | -0.3  | 11.04 |               |
| 2635 | Cg2988    | 1 | 553.3839  | 1.1  | 59    | 63  | 0  | 26.4  | 24 | A | LVILP               | E | 2.9   | 6.02  |               |
| 2716 | Cg0606    | 1 | 739.4632  | 1.6  | 27    | 32  | 0  | 21.8  | 15 | V | LWLVPI              | S | 2.3   | 6.02  |               |

END OF LIST I

| hit                                                                               | accession   | z | mass     | ppm  | start | end | mc | score | id | - | sequence | + | gravy | pI    | modification             |
|-----------------------------------------------------------------------------------|-------------|---|----------|------|-------|-----|----|-------|----|---|----------|---|-------|-------|--------------------------|
| <b>II. Purple membrane; elastase digest, nLC-ESI MS/MS, no search specificity</b> |             |   |          |      |       |     |    |       |    |   |          |   |       |       |                          |
| 1                                                                                 | P02945 BACR | 1 | 499.2278 | -0.6 | 248   | 252 | 0  | 27.3  | 26 | E | APEPS    | A | -1.1  | 3.3   |                          |
| 1                                                                                 | P02945 BACR | 1 | 505.29   | -1.8 | 231   | 235 | 0  | 32.2  | 30 | V | GFGLI    | L | 2.1   | 6.02  |                          |
| 1                                                                                 | P02945 BACR | 1 | 542.27   | -0.6 | 14    | 18  | 0  | 29.1  | 29 | S | QAQIT    | G | -0.3  | 6.02  | Gln->pyro-Glu (N-term Q) |
| 1                                                                                 | P02945 BACR | 1 | 543.3268 | -0.7 | 109   | 113 | 0  | 32.6  | 30 | L | DLALL    | V | 1.9   | 3.1   |                          |
| 1                                                                                 | P02945 BACR | 1 | 555.3632 | 0.4  | 103   | 107 | 0  | 27.1  | 18 | T | TPLLL    | L | 1.8   | 6.02  |                          |
| 1                                                                                 | P02945 BACR | 1 | 568.3584 | 0.5  | 209   | 214 | 0  | 27.8  | 27 | G | AGIVPL   | N | 2.1   | 6.02  |                          |
| 1                                                                                 | P02945 BACR | 1 | 585.3737 | 1.0  | 106   | 110 | 0  | 29.2  | 20 | L | LLLDL    | A | 2.3   | 3.1   |                          |
| 1                                                                                 | P02945 BACR | 1 | 586.3479 | 0.2  | 201   | 205 | 0  | 27.1  | 21 | V | VWLIG    | S | 2.2   | 6.02  |                          |
| 1                                                                                 | P02945 BACR | 1 | 587.3643 | 0.3  | 138   | 143 | 0  | 33.0  | 25 | V | GALTKV   | Y | 0.8   | 10.1  |                          |
| 1                                                                                 | P02945 BACR | 1 | 609.3196 | -0.8 | 157   | 161 | 0  | 25.4  | 22 | A | AMLYI    | L | 2.1   | 5.92  |                          |
| 1                                                                                 | P02945 BACR | 1 | 612.3847 | -0.8 | 60    | 65  | 0  | 27.3  | 24 | T | TLVPAI   | A | 2.0   | 6.02  |                          |
| 1                                                                                 | P02945 BACR | 1 | 613.3112 | 0.3  | 55    | 59  | 0  | 29.0  | 21 | K | FYAIT    | T | 1.4   | 5.92  |                          |
| 1                                                                                 | P02945 BACR | 1 | 621.356  | -0.3 | 220   | 224 | 0  | 27.2  | 13 | L | LFMVL    | D | 3.3   | 6.02  |                          |
| 1                                                                                 | P02945 BACR | 1 | 626.4479 | 0.3  | 234   | 238 | 0  | 14.5  | 13 | G | LILLR    | S | 2.3   | 11.04 |                          |
| 1                                                                                 | P02945 BACR | 1 | 628.2704 | 1.9  | 247   | 252 | 0  | 26.0  | 22 | A | EAPEPS   | A | -1.5  | 3.12  |                          |
| 1                                                                                 | P02945 BACR | 1 | 628.416  | 0.0  | 120   | 125 | 0  | 42.4  | 25 | G | TILALV   | G | 2.9   | 6.02  |                          |
| 1                                                                                 | P02945 BACR | 1 | 642.3952 | -0.5 | 109   | 114 | 0  | 44.7  | 27 | L | DLALLV   | D | 2.3   | 3.1   |                          |
| 1                                                                                 | P02945 BACR | 1 | 643.2709 | 0.5  | 69    | 73  | 0  | 26.6  | 15 | T | MYLSM    | L | 1.1   | 5.92  |                          |
| 1                                                                                 | P02945 BACR | 1 | 643.3541 | 0.3  | 124   | 130 | 0  | 46.5  | 31 | A | LVGADGI  | M | 1.4   | 3.1   |                          |
| 1                                                                                 | P02945 BACR | 1 | 653.3788 | -1.8 | 38    | 42  | 0  | 26.5  | 23 | T | LYFLV    | K | 2.7   | 5.92  |                          |
| 1                                                                                 | P02945 BACR | 1 | 656.4109 | 1.1  | 106   | 111 | 0  | 43.1  | 21 | L | LLLDLA   | L | 2.3   | 3.1   |                          |
| 1                                                                                 | P02945 BACR | 1 | 659.3643 | 0.6  | 25    | 30  | 0  | 43.6  | 26 | I | WLALGT   | A | 1.2   | 6.02  |                          |
| 1                                                                                 | P02945 BACR | 1 | 661.3224 | 0.2  | 150   | 154 | 0  | 26.0  | 25 | V | WWAIS    | T | 0.7   | 6.02  |                          |
| 1                                                                                 | P02945 BACR | 1 | 668.4473 | 1.3  | 103   | 108 | 0  | 27.3  | 13 | T | TPLLLL   | D | 2.2   | 6.02  |                          |
| 1                                                                                 | P02945 BACR | 1 | 669.3737 | 1.5  | 160   | 164 | 0  | 24.4  | 13 | L | YILYV    | L | 2.0   | 5.86  |                          |
| 1                                                                                 | P02945 BACR | 1 | 673.3799 | 1.0  | 201   | 206 | 0  | 42.4  | 26 | V | VWLIGS   | E | 1.7   | 6.02  |                          |
| 1                                                                                 | P02945 BACR | 1 | 674.4367 | -1.0 | 232   | 237 | 0  | 24.6  | 21 | G | FGLILL   | R | 3.1   | 6.02  |                          |
| 1                                                                                 | P02945 BACR | 1 | 680.317  | -0.3 | 98    | 102 | 0  | 30.6  | 21 | A | DWLFT    | T | 0.3   | 3.1   |                          |
| 1                                                                                 | P02945 BACR | 1 | 683.4218 | 0.4  | 60    | 66  | 0  | 32.9  | 24 | T | TLVPAIA  | F | 2.0   | 6.02  |                          |
| 1                                                                                 | P02945 BACR | 1 | 689.3782 | 0.6  | 131   | 137 | 0  | 33.0  | 25 | I | MIGTGLV  | G | 1.8   | 6.02  |                          |
| 1                                                                                 | P02945 BACR | 2 | 693.4061 | 1.2  | 182   | 187 | 0  | 19.1  | 18 | A | STFKVL   | R | 0.9   | 10.1  |                          |
| 1                                                                                 | P02945 BACR | 1 | 701.3959 | -1.0 | 215   | 220 | 0  | 38.2  | 29 | L | NIETLL   | F | 0.7   | 3.3   |                          |
| 1                                                                                 | P02945 BACR | 1 | 703.3905 | 0.1  | 191   | 196 | 0  | 28.0  | 27 | V | TVVLWS   | A | 1.6   | 6.02  |                          |
| 1                                                                                 | P02945 BACR | 1 | 703.3938 | -0.1 | 32    | 38  | 0  | 41.1  | 27 | A | LMGLGTL  | Y | 1.7   | 6.02  |                          |
| 1                                                                                 | P02945 BACR | 1 | 704.317  | 0.9  | 166   | 171 | 0  | 31.6  | 24 | L | FFGFTS   | K | 1.1   | 6.02  |                          |
| 1                                                                                 | P02945 BACR | 1 | 705.3731 | -1.7 | 131   | 137 | 0  | 29.5  | 29 | I | MIGTGLV  | G | 1.8   | 6.02  | Oxidation (M)            |
| 1                                                                                 | P02945 BACR | 1 | 714.3588 | -0.4 | 55    | 60  | 0  | 39.2  | 20 | K | FYAITT   | L | 1.1   | 5.92  |                          |



| hit | accession   | z | mass     | ppm  | start | end | mc | score | id | - | sequence   | + | gravy | pl    | modification  |
|-----|-------------|---|----------|------|-------|-----|----|-------|----|---|------------|---|-------|-------|---------------|
| 1   | P02945 BACR | 1 | 714.3912 | 0.0  | 123   | 130 | 0  | 29.3  | 29 | L | ALVGADGI   | M | 1.5   | 3.1   |               |
| 1   | P02945 BACR | 1 | 721.3435 | -0.6 | 195   | 200 | 0  | 25.9  | 24 | L | WSAYPV     | V | 0.2   | 5.92  |               |
| 1   | P02945 BACR | 1 | 722.3673 | -1.1 | 221   | 226 | 0  | 41.7  | 20 | L | FMVLDV     | S | 2.2   | 3.1   |               |
| 1   | P02945 BACR | 1 | 725.4476 | -0.7 | 199   | 204 | 0  | 24.7  | 21 | Y | PVVWLI     | G | 2.4   | 6.02  |               |
| 1   | P02945 BACR | 1 | 730.4225 | -1.2 | 134   | 141 | 0  | 34.0  | 28 | G | TGLVGALT   | K | 1.4   | 6.02  |               |
| 1   | P02945 BACR | 1 | 731.4582 | -0.8 | 231   | 237 | 0  | 36.5  | 23 | V | GFGILL     | R | 2.6   | 6.02  |               |
| 1   | P02945 BACR | 2 | 732.4534 | 0.4  | 229   | 235 | 0  | 35.7  | 16 | A | KVGFGLI    | L | 1.5   | 10.1  |               |
| 1   | P02945 BACR | 1 | 734.4401 | 0.1  | 219   | 224 | 0  | 22.5  | 13 | T | LLFMVL     | D | 3.4   | 6.02  |               |
| 1   | P02945 BACR | 1 | 738.3622 | -2.8 | 221   | 226 | 0  | 41.1  | 21 | L | FMVLDV     | S | 2.2   | 3.1   | Oxidation (M) |
| 1   | P02945 BACR | 1 | 739.3575 | -0.7 | 76    | 82  | 0  | 30.6  | 25 | L | GYGLTMV    | P | 1.0   | 5.92  |               |
| 1   | P02945 BACR | 2 | 741.4061 | 1.8  | 54    | 59  | 0  | 17.0  | 17 | K | KFYAIT     | T | 0.5   | 9.72  |               |
| 1   | P02945 BACR | 1 | 754.4265 | -0.3 | 37    | 42  | 0  | 23.9  | 15 | G | TLYFLV     | K | 2.1   | 5.92  |               |
| 1   | P02945 BACR | 1 | 755.4793 | -0.8 | 108   | 114 | 0  | 30.0  | 23 | L | LDLALLV    | D | 2.5   | 3.1   |               |
| 1   | P02945 BACR | 1 | 756.355  | -0.3 | 69    | 74  | 0  | 41.7  | 23 | T | MYLSML     | L | 1.6   | 5.92  |               |
| 1   | P02945 BACR | 1 | 759.3763 | -0.7 | 8     | 15  | 0  | 33.4  | 30 | T | AVEGVSQA   | Q | 0.5   | 3.3   |               |
| 1   | P02945 BACR | 2 | 762.4024 | 1.8  | 240   | 246 | 0  | 40.2  | 27 | S | RAIFGEA    | E | 0.4   | 6.98  |               |
| 1   | P02945 BACR | 1 | 769.4949 | -1.4 | 107   | 113 | 0  | 32.3  | 21 | L | LLDLALL    | V | 2.5   | 3.1   |               |
| 1   | P02945 BACR | 1 | 769.4949 | 0.3  | 105   | 111 | 0  | 44.4  | 21 | P | LLLLDLA    | L | 2.5   | 3.1   |               |
| 1   | P02945 BACR | 1 | 769.4949 | -1.0 | 102   | 108 | 0  | 29.5  | 21 | F | TTPLLLL    | D | 1.7   | 6.02  |               |
| 1   | P02945 BACR | 1 | 774.431  | -1.2 | 31    | 38  | 0  | 37.6  | 26 | T | ALMGLGTL   | Y | 1.7   | 6.02  |               |
| 1   | P02945 BACR | 1 | 781.3647 | 0.3  | 98    | 103 | 0  | 38.8  | 24 | A | DWLFTT     | P | 0.1   | 3.1   |               |
| 1   | P02945 BACR | 1 | 784.4695 | -1.7 | 59    | 66  | 0  | 34.2  | 25 | I | TTLVPAIA   | F | 1.6   | 6.02  |               |
| 1   | P02945 BACR | 2 | 803.4905 | 2.9  | 228   | 235 | 0  | 34.3  | 13 | S | AKVGFGLI   | L | 1.6   | 10.1  |               |
| 1   | P02945 BACR | 2 | 820.4272 | 1.6  | 148   | 153 | 0  | 22.2  | 19 | R | FVWWAI     | S | 1.9   | 6.02  |               |
| 1   | P02945 BACR | 1 | 827.4753 | 1.2  | 122   | 130 | 0  | 26.9  | 26 | I | LALVGADGI  | M | 1.7   | 3.1   |               |
| 1   | P02945 BACR | 2 | 828.3918 | -0.2 | 92    | 97  | 0  | 23.2  | 21 | I | YWARYA     | D | -0.7  | 9.58  |               |
| 1   | P02945 BACR | 1 | 831.4127 | 0.1  | 202   | 209 | 0  | 44.2  | 31 | V | WLIGSEGA   | G | 0.5   | 3.3   |               |
| 1   | P02945 BACR | 2 | 834.4276 | 1.3  | 194   | 200 | 0  | 34.0  | 24 | V | LWSAYPV    | V | 0.7   | 5.92  |               |
| 1   | P02945 BACR | 1 | 835.4514 | -1.0 | 220   | 226 | 0  | 53.1  | 17 | L | LFMVLDV    | S | 2.5   | 3.1   |               |
| 1   | P02945 BACR | 2 | 849.4783 | 1.8  | 40    | 47  | 0  | 20.4  | 20 | Y | FLVKMGV    | S | 1.5   | 10.1  |               |
| 1   | P02945 BACR | 1 | 851.4463 | -0.6 | 220   | 226 | 0  | 31.7  | 19 | L | LFMVLDV    | S | 2.5   | 3.1   | Oxidation (M) |
| 1   | P02945 BACR | 2 | 856.5382 | 0.9  | 135   | 143 | 0  | 49.5  | 21 | T | GLVGALTKV  | Y | 1.4   | 10.1  |               |
| 1   | P02945 BACR | 1 | 859.444  | 1.4  | 201   | 208 | 0  | 47.7  | 26 | V | VWLIGSEG   | A | 0.8   | 3.3   |               |
| 1   | P02945 BACR | 1 | 866.5477 | -0.1 | 104   | 111 | 0  | 52.2  | 16 | T | PLLLDLA    | L | 2.0   | 3.1   |               |
| 1   | P02945 BACR | 2 | 869.4391 | 1.3  | 69    | 75  | 0  | 39.8  | 22 | T | MYLSMLL    | G | 1.9   | 5.92  |               |
| 1   | P02945 BACR | 1 | 882.579  | -0.8 | 106   | 113 | 0  | 17.5  | 16 | L | LLLDLALL   | V | 2.6   | 3.1   |               |
| 1   | P02945 BACR | 2 | 887.5593 | -0.2 | 231   | 238 | 0  | 56.6  | 16 | V | GFGILLR    | S | 1.7   | 11.04 |               |
| 1   | P02945 BACR | 1 | 896.5583 | -0.3 | 103   | 110 | 0  | 44.4  | 17 | T | TPLLLLDL   | A | 1.7   | 3.1   |               |
| 1   | P02945 BACR | 2 | 898.476  | 1.4  | 205   | 214 | 0  | 30.0  | 27 | I | GSEGAGIVPL | N | 0.7   | 3.3   |               |
| 1   | P02945 BACR | 1 | 914.4174 | 0.1  | 96    | 102 | 0  | 30.2  | 25 | R | YADWLFT    | T | 0.3   | 3.1   |               |

| hit | accession   | z | mass      | ppm  | start | end | mc | score | id | - | sequence    | + | gravy | pl    | modification  |
|-----|-------------|---|-----------|------|-------|-----|----|-------|----|---|-------------|---|-------|-------|---------------|
| 1   | P02945 BACR | 1 | 916.5634  | -0.8 | 100   | 107 | 0  | 18.3  | 16 | W | LFTTPLL     | L | 1.9   | 6.02  |               |
| 1   | P02945 BACR | 2 | 917.4276  | 0.4  | 174   | 181 | 0  | 41.5  | 26 | A | ESMRPEVA    | S | -0.8  | 4.26  |               |
| 1   | P02945 BACR | 1 | 922.4834  | -1.6 | 220   | 227 | 0  | 33.8  | 21 | L | LFMVLVDS    | A | 2.1   | 3.1   |               |
| 1   | P02945 BACR | 2 | 926.6025  | 0.9  | 233   | 240 | 0  | 34.1  | 14 | F | GLILLRSR    | A | 0.7   | 12.4  |               |
| 1   | P02945 BACR | 2 | 930.4811  | 0.9  | 201   | 209 | 0  | 71.6  | 26 | V | VWLVIGSEGA  | G | 0.9   | 3.3   |               |
| 1   | P02945 BACR | 1 | 932.5001  | -0.3 | 28    | 37  | 0  | 28.7  | 26 | A | LGTALMGLGT  | L | 1.3   | 6.02  |               |
| 1   | P02945 BACR | 1 | 948.5354  | 0.1  | 219   | 226 | 0  | 29.5  | 23 | T | LLFMVLVDV   | S | 2.6   | 3.1   |               |
| 1   | P02945 BACR | 1 | 953.4892  | -1.3 | 72    | 80  | 0  | 38.9  | 23 | L | SMLLGYGLT   | M | 1.1   | 5.92  |               |
| 1   | P02945 BACR | 1 | 957.4556  | 0.1  | 83    | 91  | 0  | 56.8  | 27 | V | PFGGEQNPI   | Y | -0.8  | 3.3   |               |
| 1   | P02945 BACR | 2 | 957.5859  | 0.7  | 134   | 143 | 0  | 59.7  | 20 | G | TGLVGLTKV   | Y | 1.2   | 10.1  |               |
| 1   | P02945 BACR | 1 | 958.5157  | 0.7  | 123   | 132 | 0  | 35.3  | 28 | L | ALVGADGIMI  | G | 1.8   | 3.1   |               |
| 1   | P02945 BACR | 2 | 958.6215  | 0.7  | 229   | 237 | 0  | 29.1  | 13 | A | KVGFGLILL   | R | 2.0   | 10.1  |               |
| 1   | P02945 BACR | 2 | 959.548   | 1.4  | 197   | 204 | 0  | 31.3  | 20 | S | AYPVVWLI    | G | 1.8   | 5.92  |               |
| 1   | P02945 BACR | 1 | 964.5303  | -0.1 | 217   | 224 | 0  | 40.9  | 23 | I | ETLLFMVL    | D | 2.0   | 3.3   |               |
| 1   | P02945 BACR | 1 | 967.5954  | -0.5 | 103   | 111 | 0  | 57.2  | 18 | T | TPLLLLDLA   | L | 1.7   | 3.1   |               |
| 1   | P02945 BACR | 1 | 969.4841  | -1.7 | 72    | 80  | 0  | 34.4  | 23 | L | SMLLGYGLT   | M | 1.1   | 5.92  | Oxidation (M) |
| 1   | P02945 BACR | 2 | 969.5358  | 1.4  | 38    | 45  | 0  | 42.4  | 23 | T | LYFLVKGM    | G | 1.4   | 9.72  |               |
| 1   | P02945 BACR | 1 | 974.5107  | -0.6 | 128   | 137 | 0  | 50.5  | 27 | A | DGIMIGTGLV  | G | 1.4   | 3.1   |               |
| 1   | P02945 BACR | 2 | 974.5913  | 0.1  | 231   | 239 | 0  | 44.6  | 19 | V | GFGILLRS    | R | 1.4   | 11.04 |               |
| 1   | P02945 BACR | 1 | 979.5048  | 0.1  | 215   | 222 | 0  | 32.8  | 25 | L | NIETLLFM    | V | 1.1   | 3.3   |               |
| 1   | P02945 BACR | 2 | 981.6474  | 1.2  | 106   | 114 | 0  | 45.7  | 13 | L | LLLDLALLV   | D | 2.8   | 3.1   |               |
| 1   | P02945 BACR | 1 | 984.5354  | 0.8  | 157   | 164 | 0  | 30.1  | 25 | A | AMLYILYV    | L | 2.2   | 5.86  |               |
| 1   | P02945 BACR | 2 | 986.6277  | 0.6  | 230   | 238 | 0  | 81.9  | 13 | K | VGFGILLR    | S | 2.0   | 11.04 |               |
| 1   | P02945 BACR | 2 | 991.5015  | 0.9  | 98    | 105 | 0  | 67.2  | 27 | A | DWLFTTPL    | L | 0.4   | 3.1   |               |
| 1   | P02945 BACR | 2 | 1001.5029 | 2.4  | 114   | 123 | 0  | 32.7  | 28 | L | VDADQGTILA  | L | 0.5   | 2.92  |               |
| 1   | P02945 BACR | 2 | 1012.5416 | -0.5 | 39    | 47  | 0  | 47.1  | 26 | L | YFLVKGMGV   | S | 1.2   | 9.72  |               |
| 1   | P02945 BACR | 2 | 1014.6074 | 0.8  | 133   | 143 | 0  | 54.3  | 21 | I | GTGLVGLTKV  | Y | 1.0   | 10.1  |               |
| 1   | P02945 BACR | 2 | 1029.6586 | 0.6  | 228   | 237 | 0  | 43.9  | 13 | S | AKVGFGLILL  | R | 2.0   | 10.1  |               |
| 1   | P02945 BACR | 2 | 1031.5685 | 0.2  | 131   | 141 | 0  | 82.5  | 25 | I | MIGTGLVGLT  | K | 1.6   | 6.02  |               |
| 1   | P02945 BACR | 1 | 1032.44   | -0.5 | 243   | 252 | 0  | 35.9  | 24 | I | FGAEAEPEPS  | A | -0.9  | 3.02  |               |
| 1   | P02945 BACR | 1 | 1032.5856 | -0.5 | 59    | 68  | 0  | 34.2  | 23 | I | TTLVPAIAFT  | M | 1.5   | 6.02  |               |
| 1   | P02945 BACR | 2 | 1043.5499 | 0.7  | 112   | 121 | 0  | 81.0  | 28 | A | LLVDADQGTI  | L | 0.7   | 2.92  |               |
| 1   | P02945 BACR | 1 | 1045.5478 | 0.5  | 124   | 134 | 0  | 33.3  | 27 | A | LVGADGIMIGT | G | 1.4   | 3.1   |               |
| 1   | P02945 BACR | 1 | 1045.5842 | -1.9 | 28    | 38  | 0  | 28.8  | 24 | A | LGTALMGLGLT | Y | 1.5   | 6.02  |               |
| 1   | P02945 BACR | 2 | 1055.5552 | 0.6  | 19    | 26  | 0  | 33.4  | 26 | T | GRPEWIWL    | A | -0.4  | 6.98  |               |
| 1   | P02945 BACR | 2 | 1062.5386 | 1.2  | 97    | 105 | 0  | 33.7  | 26 | Y | ADWLFTTPL   | L | 0.5   | 3.1   |               |
| 1   | P02945 BACR | 1 | 1067.6227 | -2.4 | 210   | 219 | 0  | 27.7  | 21 | A | GIVPLNIETL  | L | 1.1   | 3.3   |               |
| 1   | P02945 BACR | 1 | 1070.5185 | 0.1  | 95    | 102 | 0  | 43.5  | 24 | A | RYADWLFT    | T | -0.3  | 6.7   |               |
| 1   | P02945 BACR | 2 | 1078.5733 | 0.1  | 215   | 223 | 0  | 32.0  | 25 | L | NIETLLFMV   | L | 1.5   | 3.3   |               |
| 1   | P02945 BACR | 1 | 1094.5682 | -0.5 | 215   | 223 | 0  | 47.8  | 26 | L | NIETLLFMV   | L | 1.5   | 3.3   | Oxidation (M) |

| hit | accession   | z | mass      | ppm  | start | end | mc | score | id | - | sequence      | + | gravy | pI    | modification  |
|-----|-------------|---|-----------|------|-------|-----|----|-------|----|---|---------------|---|-------|-------|---------------|
| 1   | P02945 BACR | 2 | 1096.5661 | -1.3 | 73    | 82  | 0  | 48.8  | 25 | S | MLLGYGLTMV    | P | 1.7   | 5.92  |               |
| 1   | P02945 BACR | 1 | 1097.5216 | -0.2 | 76    | 86  | 0  | 27.3  | 26 | L | GYGLTMVPPFGG  | E | 0.7   | 5.92  |               |
| 1   | P02945 BACR | 1 | 1102.5693 | -0.4 | 126   | 137 | 0  | 32.8  | 27 | V | GADGIMIGTGLV  | G | 1.2   | 3.1   |               |
| 1   | P02945 BACR | 1 | 1103.6015 | -0.3 | 197   | 206 | 0  | 26.5  | 26 | S | AYPVVWLIGS    | E | 1.4   | 5.92  |               |
| 1   | P02945 BACR | 2 | 1109.6485 | -0.1 | 34    | 43  | 0  | 31.1  | 21 | M | GLGTLYFLVK    | G | 1.2   | 9.72  |               |
| 1   | P02945 BACR | 2 | 1112.561  | -1.5 | 73    | 82  | 0  | 26.5  | 26 | S | MLLGYGLTMV    | P | 1.7   | 5.92  | Oxidation (M) |
| 1   | P02945 BACR | 2 | 1114.587  | -1.1 | 115   | 125 | 0  | 56.5  | 28 | V | DADQGTILALV   | G | 0.8   | 2.92  |               |
| 1   | P02945 BACR | 1 | 1114.587  | 1.3  | 113   | 123 | 0  | 34.2  | 27 | L | LVDADQGTILA   | L | 0.8   | 2.92  |               |
| 1   | P02945 BACR | 1 | 1116.5849 | -1.3 | 123   | 134 | 0  | 32.8  | 27 | L | ALVGADGIMIGT  | G | 1.4   | 3.1   |               |
| 1   | P02945 BACR | 2 | 1116.6907 | 0.7  | 227   | 237 | 0  | 48.0  | 16 | V | SAKVGFGILL    | R | 1.7   | 10.1  |               |
| 1   | P02945 BACR | 2 | 1117.5552 | 1.5  | 67    | 75  | 0  | 48.8  | 28 | A | FTMYLSMLL     | G | 1.7   | 5.92  |               |
| 1   | P02945 BACR | 2 | 1125.6256 | -0.4 | 38    | 47  | 0  | 43.9  | 24 | T | LYFLVKGMGV    | S | 1.5   | 9.72  |               |
| 1   | P02945 BACR | 2 | 1126.5923 | 2.4  | 19    | 27  | 0  | 40.8  | 25 | T | GRPEWIWLA     | L | -0.2  | 6.98  |               |
| 1   | P02945 BACR | 1 | 1126.6023 | 0.4  | 199   | 209 | 0  | 45.3  | 26 | Y | PVVWLIGSEGA   | G | 1.0   | 3.3   |               |
| 1   | P02945 BACR | 3 | 1130.6924 | 0.7  | 231   | 240 | 0  | 15.7  | 14 | V | GFGILLRSLR    | A | 0.8   | 12.4  |               |
| 1   | P02945 BACR | 2 | 1133.5501 | -1.1 | 67    | 75  | 0  | 33.9  | 27 | A | FTMYLSMLL     | G | 1.7   | 5.92  | Oxidation (M) |
| 1   | P02945 BACR | 2 | 1133.6121 | 1.3  | 191   | 200 | 0  | 67.2  | 27 | V | TVVLSAYPV     | V | 1.3   | 5.92  |               |
| 1   | P02945 BACR | 2 | 1145.524  | -0.7 | 242   | 252 | 0  | 85.9  | 26 | A | IFGEAEPEPS    | A | -0.4  | 3.02  |               |
| 1   | P02945 BACR | 2 | 1152.6179 | 2.3  | 50    | 59  | 0  | 36.7  | 24 | D | PDAKKFYAIT    | T | -0.4  | 9.62  |               |
| 1   | P02945 BACR | 2 | 1156.634  | 1.0  | 112   | 122 | 0  | 105.9 | 26 | A | LLVDADQGTIL   | A | 0.9   | 2.92  |               |
| 1   | P02945 BACR | 2 | 1159.6635 | 0.5  | 131   | 142 | 0  | 89.8  | 23 | I | MIGTGLVGLTK   | V | 1.1   | 10.1  |               |
| 1   | P02945 BACR | 2 | 1166.67   | 0.3  | 34    | 44  | 0  | 81.2  | 22 | M | GLGTLYFLVKG   | M | 1.0   | 9.72  |               |
| 1   | P02945 BACR | 2 | 1171.5662 | -0.6 | 95    | 103 | 0  | 29.1  | 25 | A | RYADWLFTT     | P | -0.4  | 6.7   |               |
| 1   | P02945 BACR | 2 | 1173.7234 | 0.7  | 184   | 193 | 0  | 19.9  | 14 | T | FKVLRNVTVV    | L | 1.1   | 11.48 |               |
| 1   | P02945 BACR | 2 | 1180.7067 | -0.2 | 210   | 220 | 0  | 38.5  | 19 | A | GIVPLNIETLL   | F | 1.4   | 3.3   |               |
| 1   | P02945 BACR | 2 | 1183.5981 | 0.3  | 72    | 82  | 0  | 68.8  | 26 | L | SMLLGYGLTMV   | P | 1.4   | 5.92  |               |
| 1   | P02945 BACR | 2 | 1185.687  | 0.8  | 187   | 196 | 0  | 23.3  | 23 | V | LRNVTVVLWS    | A | 1.0   | 11.04 |               |
| 1   | P02945 BACR | 2 | 1187.5645 | 0.3  | 81    | 91  | 0  | 76.5  | 27 | T | MVPFGGEQNPI   | Y | -0.1  | 3.3   |               |
| 1   | P02945 BACR | 2 | 1191.6573 | 0.8  | 215   | 224 | 0  | 56.6  | 23 | L | NIETLLFMVL    | D | 1.7   | 3.3   |               |
| 1   | P02945 BACR | 2 | 1199.593  | -0.8 | 72    | 82  | 0  | 36.2  | 26 | L | SMLLGYGLTMV   | P | 1.4   | 5.92  | Oxidation (M) |
| 1   | P02945 BACR | 2 | 1199.655  | 2.1  | 201   | 212 | 0  | 61.8  | 26 | V | VWLIGSEGAGIV  | P | 1.4   | 3.3   |               |
| 1   | P02945 BACR | 2 | 1215.6533 | 1.3  | 128   | 140 | 0  | 76.5  | 26 | A | DGIMIGTGLVGAL | T | 1.4   | 3.1   |               |
| 1   | P02945 BACR | 2 | 1215.7115 | 1.0  | 101   | 111 | 0  | 45.0  | 20 | L | FTPLLLDLA     | L | 1.6   | 3.1   |               |
| 1   | P02945 BACR | 2 | 1216.5612 | 0.9  | 241   | 252 | 0  | 78.8  | 26 | R | AIFGEAEPEPS   | A | -0.2  | 3.02  |               |
| 1   | P02945 BACR | 2 | 1217.6696 | 0.8  | 98    | 107 | 0  | 38.7  | 24 | A | DWLFTTPLLL    | L | 1.1   | 3.1   |               |
| 1   | P02945 BACR | 2 | 1225.6019 | 0.4  | 96    | 105 | 0  | 62.8  | 26 | R | YADWLFTTPL    | L | 0.4   | 3.1   |               |
| 1   | P02945 BACR | 2 | 1225.6781 | 0.8  | 32    | 42  | 0  | 36.5  | 25 | A | LMGLGTLYFLV   | K | 1.9   | 5.92  |               |
| 1   | P02945 BACR | 2 | 1227.64   | 0.5  | 18    | 27  | 0  | 29.7  | 28 | I | TGRPEWIWLA    | L | -0.2  | 6.98  |               |
| 1   | P02945 BACR | 2 | 1227.6711 | 0.9  | 112   | 123 | 0  | 101.3 | 25 | A | LLVDADQGTILA  | L | 1.0   | 2.92  |               |
| 1   | P02945 BACR | 2 | 1241.673  | 0.5  | 32    | 42  | 0  | 28.0  | 26 | A | LMGLGTLYFLV   | K | 1.9   | 5.92  | Oxidation (M) |

| hit | accession   | z | mass      | ppm  | start | end | mc | score | id | - | sequence        | + | gravy | pl    | modification             |
|-----|-------------|---|-----------|------|-------|-----|----|-------|----|---|-----------------|---|-------|-------|--------------------------|
| 1   | P02945 BACR | 2 | 1242.6456 | 1.1  | 115   | 127 | 0  | 60.0  | 27 | V | DADQGTILALVGA   | D | 0.7   | 2.92  |                          |
| 1   | P02945 BACR | 2 | 1253.6292 | 0.7  | 48    | 58  | 0  | 27.5  | 26 | V | SDPDAKKFYAI     | T | -0.7  | 6.8   |                          |
| 1   | P02945 BACR | 2 | 1258.7319 | -1.0 | 131   | 143 | 0  | 106.6 | 23 | I | MIGTGLVGALTKV   | Y | 1.4   | 10.1  |                          |
| 1   | P02945 BACR | 2 | 1274.7268 | -1.6 | 131   | 143 | 0  | 92.6  | 23 | I | MIGTGLVGALTKV   | Y | 1.4   | 10.1  | Oxidation (M)            |
| 1   | P02945 BACR | 2 | 1274.7711 | 0.8  | 183   | 193 | 0  | 60.7  | 17 | S | TFKVLNRNVTVV    | L | 0.9   | 11.48 |                          |
| 1   | P02945 BACR | 2 | 1280.6513 | 1.0  | 14    | 24  | 0  | 34.8  | 26 | S | QAQITGRPEWI     | W | -0.7  | 6.98  | Gln->pyro-Glu (N-term Q) |
| 1   | P02945 BACR | 2 | 1285.7316 | 0.5  | 120   | 132 | 0  | 56.2  | 23 | G | TILALVGADGIMI   | G | 2.0   | 3.1   |                          |
| 1   | P02945 BACR | 1 | 1288.6122 | -1.5 | 80    | 91  | 0  | 39.0  | 28 | L | TMVFPFGGEQNPI   | Y | -0.2  | 3.3   |                          |
| 1   | P02945 BACR | 2 | 1296.7152 | -0.2 | 31    | 42  | 0  | 55.9  | 24 | T | ALMGLGTLYFLV    | K | 1.9   | 5.92  |                          |
| 1   | P02945 BACR | 2 | 1297.7104 | -2.1 | 34    | 45  | 0  | 31.0  | 25 | M | GLGTLYFLVKGM    | G | 1.1   | 9.72  |                          |
| 1   | P02945 BACR | 2 | 1301.7265 | 1.8  | 120   | 132 | 0  | 51.7  | 25 | G | TILALVGADGIMI   | G | 2.0   | 3.1   | Oxidation (M)            |
| 1   | P02945 BACR | 2 | 1310.7234 | 0.7  | 202   | 214 | 0  | 61.4  | 26 | V | WLIGSEGAGIVPL   | N | 1.1   | 3.3   |                          |
| 1   | P02945 BACR | 1 | 1312.7101 | -1.2 | 31    | 42  | 0  | 32.1  | 27 | T | ALMGLGTLYFLV    | K | 1.9   | 5.92  | Oxidation (M)            |
| 1   | P02945 BACR | 2 | 1314.7217 | 0.8  | 124   | 137 | 0  | 79.1  | 25 | A | LVGADGIMIGTGLV  | G | 1.6   | 3.1   |                          |
| 1   | P02945 BACR | 2 | 1316.701  | 0.5  | 128   | 141 | 0  | 72.3  | 25 | A | DGIMIGTGLVGALT  | K | 1.3   | 3.1   |                          |
| 1   | P02945 BACR | 2 | 1326.7395 | 1.3  | 113   | 125 | 0  | 40.7  | 24 | L | LVDADQGTILALV   | G | 1.3   | 2.92  |                          |
| 1   | P02945 BACR | 1 | 1330.7167 | -0.5 | 124   | 137 | 0  | 34.1  | 26 | A | LVGADGIMIGTGLV  | G | 1.6   | 3.1   | Oxidation (M)            |
| 1   | P02945 BACR | 2 | 1330.7537 | 2.0  | 98    | 108 | 0  | 46.6  | 23 | A | DWLFTTPLL       | D | 1.3   | 3.1   |                          |
| 1   | P02945 BACR | 2 | 1338.7257 | -1.1 | 60    | 71  | 0  | 31.0  | 25 | T | TLVPAIAFTMYL    | S | 1.7   | 5.92  |                          |
| 1   | P02945 BACR | 2 | 1341.714  | 2.1  | 117   | 130 | 0  | 81.6  | 26 | A | DQGTILALVGADGI  | M | 0.9   | 2.92  |                          |
| 1   | P02945 BACR | 1 | 1343.7119 | 0.7  | 126   | 140 | 0  | 26.8  | 26 | V | GADGIMIGTGLVGAL | T | 1.3   | 3.1   |                          |
| 1   | P02945 BACR | 2 | 1345.7434 | 1.0  | 194   | 204 | 0  | 55.7  | 24 | V | LWSAYPVVWLI     | G | 1.5   | 5.92  |                          |
| 1   | P02945 BACR | 2 | 1353.773  | -0.1 | 32    | 43  | 0  | 40.1  | 22 | A | LMGLGTLYFLVK    | G | 1.5   | 9.72  |                          |
| 1   | P02945 BACR | 2 | 1354.6769 | 0.1  | 48    | 59  | 0  | 44.3  | 26 | V | SDPDAKKFYAIT    | T | -0.7  | 6.8   |                          |
| 1   | P02945 BACR | 2 | 1360.6771 | 0.2  | 69    | 80  | 0  | 67.0  | 28 | T | MYLSMLLGYGLT    | M | 1.2   | 5.86  |                          |
| 1   | P02945 BACR | 1 | 1360.7027 | -1.2 | 197   | 209 | 0  | 37.0  | 27 | S | AYPVVWLIGSEGA   | G | 0.9   | 3.3   |                          |
| 1   | P02945 BACR | 2 | 1361.8031 | -0.7 | 182   | 193 | 0  | 35.2  | 19 | A | STFKVLNRNVTVV   | L | 0.8   | 11.48 |                          |
| 1   | P02945 BACR | 2 | 1371.7432 | -0.2 | 124   | 138 | 0  | 40.4  | 26 | A | LVGADGIMIGTGLVG | A | 1.5   | 3.1   |                          |
| 1   | P02945 BACR | 2 | 1372.6623 | -1.0 | 240   | 252 | 0  | 87.2  | 27 | S | RAIFGEAEPEPS    | A | -0.5  | 3.96  |                          |
| 1   | P02945 BACR | 1 | 1377.6353 | -1.2 | 83    | 94  | 0  | 48.6  | 26 | V | PFGGEQNPIYWA    | R | -0.6  | 3.3   |                          |
| 1   | P02945 BACR | 2 | 1381.703  | 0.5  | 95    | 105 | 0  | 43.5  | 26 | A | RYADWLFTTPL     | L | -0.1  | 6.7   |                          |
| 1   | P02945 BACR | 2 | 1397.7456 | -1.1 | 16    | 26  | 0  | 43.4  | 26 | A | QITGRPEWIWL     | A | -0.3  | 6.98  |                          |
| 1   | P02945 BACR | 2 | 1397.7629 | 0.1  | 30    | 42  | 0  | 37.9  | 25 | G | TALMGLGTLYFLV   | K | 1.7   | 5.92  |                          |
| 1   | P02945 BACR | 2 | 1401.6962 | -0.9 | 79    | 91  | 0  | 45.1  | 28 | G | LTMVFPFGGEQNPI  | Y | 0.2   | 3.3   |                          |
| 1   | P02945 BACR | 2 | 1405.7527 | 1.0  | 215   | 226 | 0  | 30.5  | 25 | L | NIETLLFMVLDV    | S | 1.5   | 3     |                          |
| 1   | P02945 BACR | 2 | 1409.7191 | -0.7 | 46    | 58  | 0  | 32.6  | 26 | M | GVSDPDAKKFYAI   | T | -0.3  | 6.8   |                          |
| 1   | P02945 BACR | 2 | 1409.7919 | 0.8  | 201   | 214 | 0  | 57.6  | 24 | V | VWLIGSEGAGIVPL  | N | 1.3   | 3.3   |                          |
| 1   | P02945 BACR | 2 | 1421.7476 | -0.6 | 215   | 226 | 0  | 35.4  | 26 | L | NIETLLFMVLDV    | S | 1.5   | 3     | Oxidation (M)            |
| 1   | P02945 BACR | 2 | 1424.8101 | 0.4  | 31    | 43  | 0  | 70.5  | 22 | T | ALMGLGTLYFLVK   | G | 1.5   | 9.72  |                          |
| 1   | P02945 BACR | 3 | 1427.6755 | 1.3  | 45    | 57  | 0  | 42.7  | 27 | G | MGVSDPDAKKFYA   | I | -0.5  | 6.8   |                          |

| hit | accession   | z | mass      | ppm  | start | end | mc | score | id | - | sequence           | + | gravy | pl   | modification  |
|-----|-------------|---|-----------|------|-------|-----|----|-------|----|---|--------------------|---|-------|------|---------------|
| 1   | P02945 BACR | 2 | 1439.8235 | 0.7  | 112   | 125 | 0  | 106.6 | 22 | A | LLVDADQGTLALV      | G | 1.4   | 2.92 |               |
| 1   | P02945 BACR | 2 | 1440.8051 | 0.5  | 31    | 43  | 0  | 77.3  | 25 | T | ALMGLGTLVFLVK      | G | 1.5   | 9.72 | Oxidation (M) |
| 1   | P02945 BACR | 2 | 1442.7803 | 2.9  | 124   | 139 | 0  | 26.7  | 26 | A | LVGADGIMIGTGLVGA   | L | 1.5   | 3.1  |               |
| 1   | P02945 BACR | 2 | 1444.7596 | 1.0  | 126   | 141 | 0  | 83.2  | 27 | V | GADGIMIGTGLVGALT   | K | 1.2   | 3.1  |               |
| 1   | P02945 BACR | 2 | 1453.8003 | -2.1 | 34    | 47  | 0  | 51.1  | 25 | M | GLGTLVFLVKGGMV     | S | 1.2   | 9.72 |               |
| 1   | P02945 BACR | 2 | 1455.7245 | 0.2  | 48    | 60  | 0  | 31.5  | 28 | V | SDPDAKKFYAITT      | L | -0.7  | 6.8  |               |
| 1   | P02945 BACR | 2 | 1455.7821 | 0.7  | 109   | 122 | 0  | 35.4  | 26 | L | DLALLVDADQGTIL     | A | 0.9   | 2.82 |               |
| 1   | P02945 BACR | 2 | 1458.7752 | 1.0  | 124   | 139 | 0  | 36.3  | 27 | A | LVGADGIMIGTGLVGA   | L | 1.5   | 3.1  | Oxidation (M) |
| 1   | P02945 BACR | 2 | 1459.6943 | 0.4  | 239   | 252 | 0  | 106.9 | 27 | R | SRAIFGEAEPEPS      | A | -0.5  | 3.96 |               |
| 1   | P02945 BACR | 2 | 1467.8185 | 0.7  | 106   | 119 | 0  | 37.7  | 22 | L | LLLDLALLVDADQGG    | T | 1.2   | 2.82 |               |
| 1   | P02945 BACR | 2 | 1468.7773 | -1.3 | 205   | 219 | 0  | 42.6  | 26 | I | GSEGAGIVPLNIETL    | L | 0.5   | 3.12 |               |
| 1   | P02945 BACR | 2 | 1468.7827 | 0.1  | 16    | 27  | 0  | 44.6  | 27 | A | QITGRPEWIWLA       | L | -0.1  | 6.98 |               |
| 1   | P02945 BACR | 2 | 1481.8316 | -0.1 | 31    | 44  | 0  | 60.1  | 23 | T | ALMGLGTLVFLVKG     | M | 1.3   | 9.72 |               |
| 1   | P02945 BACR | 2 | 1489.7969 | 0.3  | 194   | 206 | 0  | 57.7  | 26 | V | LWSAYPVVWLIGS      | E | 1.2   | 5.92 |               |
| 1   | P02945 BACR | 2 | 1492.7847 | 0.8  | 215   | 227 | 0  | 34.4  | 26 | L | NIETLLFMVLDVS      | A | 1.3   | 3    |               |
| 1   | P02945 BACR | 2 | 1498.7932 | -0.1 | 18    | 30  | 0  | 54.0  | 27 | I | TGRPEWIWLALGT      | A | 0.0   | 6.98 |               |
| 1   | P02945 BACR | 2 | 1508.7796 | 0.4  | 215   | 227 | 0  | 28.5  | 26 | L | NIETLLFMVLDVS      | A | 1.3   | 3    | Oxidation (M) |
| 1   | P02945 BACR | 2 | 1510.7668 | -1.7 | 46    | 59  | 0  | 41.1  | 26 | M | GVSDPDAKKFYAIT     | T | -0.3  | 6.8  |               |
| 1   | P02945 BACR | 2 | 1513.8174 | -0.2 | 123   | 139 | 0  | 43.9  | 27 | L | ALVGADGIMIGTGLVGA  | L | 1.5   | 3.1  |               |
| 1   | P02945 BACR | 2 | 1533.7365 | 0.5  | 83    | 95  | 0  | 58.9  | 28 | V | PFGGEQNPIYWAR      | Y | -0.9  | 6.88 |               |
| 1   | P02945 BACR | 3 | 1540.7596 | 0.8  | 45    | 58  | 0  | 43.2  | 27 | G | MGVSDPDAKKFYAI     | T | -0.1  | 6.8  |               |
| 1   | P02945 BACR | 2 | 1543.8644 | 0.1  | 128   | 143 | 0  | 64.5  | 23 | A | DGIMIGTGLVGALTKV   | Y | 1.1   | 6.76 |               |
| 1   | P02945 BACR | 2 | 1559.8593 | 0.3  | 128   | 143 | 0  | 42.2  | 25 | A | DGIMIGTGLVGALTKV   | Y | 1.1   | 6.76 | Oxidation (M) |
| 1   | P02945 BACR | 2 | 1567.8684 | 0.4  | 28    | 42  | 0  | 37.1  | 24 | A | LGTALMGLGTLVFLV    | K | 1.7   | 5.92 |               |
| 1   | P02945 BACR | 2 | 1567.8821 | 0.4  | 112   | 127 | 0  | 38.0  | 23 | A | LLVDADQGTLALVGA    | D | 1.3   | 2.92 |               |
| 1   | P02945 BACR | 2 | 1571.8593 | -1.1 | 124   | 140 | 0  | 30.3  | 26 | A | LVGADGIMIGTGLVGA   | T | 1.7   | 3.1  | Oxidation (M) |
| 1   | P02945 BACR | 2 | 1583.8633 | -0.2 | 28    | 42  | 0  | 35.7  | 26 | A | LGTALMGLGTLVFLV    | K | 1.7   | 5.92 | Oxidation (M) |
| 1   | P02945 BACR | 2 | 1607.7442 | -1.7 | 81    | 94  | 0  | 71.8  | 27 | T | MVPFGGEQNPIYWA     | R | -0.1  | 3.3  |               |
| 1   | P02945 BACR | 2 | 1615.9086 | -0.4 | 187   | 200 | 0  | 40.8  | 24 | V | LRNVTVVLWSAYPV     | V | 0.9   | 9.84 |               |
| 1   | P02945 BACR | 2 | 1623.7392 | -1.4 | 81    | 94  | 0  | 40.6  | 26 | T | MVPFGGEQNPIYWA     | R | -0.1  | 3.3  | Oxidation (M) |
| 1   | P02945 BACR | 2 | 1629.9018 | -0.1 | 98    | 111 | 0  | 33.1  | 25 | A | DWLFTTPLLDDLA      | L | 1.2   | 2.92 |               |
| 1   | P02945 BACR | 2 | 1636.9188 | 0.8  | 201   | 216 | 0  | 27.9  | 23 | V | VWLIGSEGAGIVPLNI   | E | 1.2   | 3.3  |               |
| 1   | P02945 BACR | 2 | 1638.8882 | 0.8  | 16    | 29  | 0  | 29.4  | 25 | A | QITGRPEWIWLAG      | T | 0.1   | 6.98 |               |
| 1   | P02945 BACR | 2 | 1641.8072 | -1.3 | 45    | 59  | 0  | 32.7  | 27 | G | MGVSDPDAKKFYAIT    | T | -0.2  | 6.8  |               |
| 1   | P02945 BACR | 2 | 1644.928  | 0.8  | 191   | 204 | 0  | 48.6  | 23 | V | TVVLWSAYPVVWLI     | G | 1.8   | 5.92 |               |
| 1   | P02945 BACR | 2 | 1656.9121 | 0.5  | 124   | 141 | 0  | 73.1  | 26 | A | LVGADGIMIGTGLVGALT | K | 1.5   | 3.1  |               |
| 1   | P02945 BACR | 2 | 1671.923  | 0.4  | 126   | 143 | 0  | 72.2  | 25 | V | GADGIMIGTGLVGALTKV | Y | 1.1   | 6.76 |               |
| 1   | P02945 BACR | 2 | 1675.861  | 0.1  | 194   | 208 | 0  | 52.8  | 28 | V | LWSAYPVVWLIGSEG    | A | 0.8   | 3.3  |               |
| 1   | P02945 BACR | 2 | 1678.8025 | -0.2 | 76    | 91  | 0  | 62.4  | 28 | L | GYGLTMVFPFGGEQNPI  | Y | 0.0   | 3.3  |               |
| 1   | P02945 BACR | 2 | 1681.9502 | -0.5 | 106   | 121 | 0  | 23.9  | 22 | L | LLLDLALLVDADQGTI   | L | 1.3   | 2.82 |               |

| hit | accession   | z | mass      | ppm  | start | end | mc | score | id | - | sequence              | + | gravy | pl   | modification             |
|-----|-------------|---|-----------|------|-------|-----|----|-------|----|---|-----------------------|---|-------|------|--------------------------|
| 1   | P02945 BACR | 2 | 1687.9179 | -0.4 | 126   | 143 | 0  | 59.7  | 25 | V | GADGIMIGTGLVGALTKV    | Y | 1.1   | 6.76 | Oxidation (M)            |
| 1   | P02945 BACR | 2 | 1698.8287 | 0.0  | 44    | 59  | 0  | 45.5  | 28 | K | GMGVSDPDAKKFYAIT      | T | -0.2  | 6.8  |                          |
| 1   | P02945 BACR | 2 | 1720.9552 | -1.5 | 95    | 108 | 0  | 39.3  | 24 | A | RYADWLFTTPLLLL        | D | 0.7   | 6.7  |                          |
| 1   | P02945 BACR | 2 | 1722.9093 | -0.4 | 16    | 30  | 0  | 28.0  | 26 | A | QITGRPEWIWLALGT       | A | 0.1   | 6.98 | Gln->pyro-Glu (N-term Q) |
| 1   | P02945 BACR | 2 | 1727.9492 | 0.1  | 123   | 141 | 0  | 27.3  | 25 | L | ALVGADGIMIGTGLVGALT   | K | 1.5   | 3.1  |                          |
| 1   | P02945 BACR | 2 | 1738.9717 | 0.0  | 109   | 125 | 0  | 48.9  | 23 | L | DLALLVDADQGTILALV     | G | 1.3   | 2.82 |                          |
| 1   | P02945 BACR | 2 | 1739.9359 | -0.7 | 16    | 30  | 0  | 55.4  | 26 | A | QITGRPEWIWLALGT       | A | 0.1   | 6.98 |                          |
| 1   | P02945 BACR | 2 | 1742.8549 | 0.5  | 45    | 60  | 0  | 46.9  | 28 | G | MGVSDPDAKKFYAITT      | L | -0.2  | 6.8  |                          |
| 1   | P02945 BACR | 2 | 1746.8981 | 0.5  | 194   | 209 | 0  | 100.4 | 27 | V | LWSAYPVVWLIGSEGA      | G | 0.8   | 3.3  |                          |
| 1   | P02945 BACR | 3 | 1768.962  | 0.7  | 31    | 47  | 0  | 45.0  | 25 | T | ALMGLGTLYFLVKGMGV     | S | 1.4   | 9.72 |                          |
| 1   | P02945 BACR | 2 | 1771.9026 | 0.5  | 115   | 132 | 0  | 68.6  | 28 | V | DADQGTILALVGADGIMI    | G | 0.9   | 2.82 |                          |
| 1   | P02945 BACR | 3 | 1784.9569 | 0.3  | 31    | 47  | 0  | 40.7  | 26 | T | ALMGLGTLYFLVKGMGV     | S | 1.4   | 9.72 | Oxidation (M)            |
| 1   | P02945 BACR | 2 | 1785.007  | 0.4  | 124   | 142 | 0  | 54.0  | 23 | A | LVGADGIMIGTGLVGALTK   | V | 1.2   | 6.76 |                          |
| 1   | P02945 BACR | 2 | 1791.8866 | 0.9  | 75    | 91  | 0  | 41.1  | 27 | L | LGYLTMVFPFGGEQNPI     | Y | 0.2   | 3.3  |                          |
| 1   | P02945 BACR | 2 | 1801.8828 | -0.7 | 92    | 105 | 0  | 35.2  | 28 | I | YWARYADWLFTTPL        | L | -0.1  | 6.64 |                          |
| 1   | P02945 BACR | 2 | 1826.9237 | -1.5 | 43    | 59  | 0  | 51.7  | 28 | V | KGMGVSDPDAKKFYAIT     | T | -0.4  | 9.56 |                          |
| 1   | P02945 BACR | 2 | 1835.9669 | 1.8  | 48    | 64  | 0  | 32.0  | 27 | V | SDPDAKKFYAITTLVPA     | I | 0.0   | 6.8  |                          |
| 1   | P02945 BACR | 2 | 1840.0135 | 0.1  | 197   | 214 | 0  | 47.9  | 26 | S | AYPVWLIGSEGAGIVPL     | N | 1.2   | 3.3  |                          |
| 1   | P02945 BACR | 2 | 1845.9665 | -0.2 | 193   | 209 | 0  | 38.6  | 27 | V | VLWSAYPVVWLIGSEGA     | G | 1.0   | 3.3  |                          |
| 1   | P02945 BACR | 2 | 1853.0146 | 0.5  | 112   | 130 | 0  | 123.6 | 24 | A | LLVDADQGTILALVGADGI   | M | 1.2   | 2.82 |                          |
| 1   | P02945 BACR | 2 | 1856.0441 | -0.3 | 123   | 142 | 0  | 77.4  | 23 | L | ALVGADGIMIGTGLVGALTK  | V | 1.3   | 6.76 |                          |
| 1   | P02945 BACR | 2 | 1858.0393 | 0.1  | 189   | 204 | 0  | 50.3  | 24 | R | NVTVWLWSAYPVVWLI      | G | 1.6   | 5.92 |                          |
| 1   | P02945 BACR | 2 | 1864.0022 | 0.8  | 96    | 111 | 0  | 62.1  | 25 | R | YADWLFTTPLLLDLA       | L | 1.1   | 2.92 |                          |
| 1   | P02945 BACR | 2 | 1866.0714 | 0.0  | 106   | 123 | 0  | 75.8  | 22 | L | LLLDLALLVDADQGTILA    | L | 1.4   | 2.82 |                          |
| 1   | P02945 BACR | 2 | 1867.0091 | 1.0  | 201   | 218 | 0  | 47.0  | 26 | V | VWLIGSEGAGIVPLNIET    | L | 0.9   | 3.12 |                          |
| 1   | P02945 BACR | 2 | 1884.0754 | -0.5 | 124   | 143 | 0  | 130.4 | 22 | A | LVGADGIMIGTGLVGALTKV  | Y | 1.4   | 6.76 |                          |
| 1   | P02945 BACR | 2 | 1885.0635 | 1.3  | 210   | 226 | 0  | 83.1  | 22 | A | GIVPLNIETLLFMVLDV     | S | 1.7   | 3    |                          |
| 1   | P02945 BACR | 2 | 1900.0704 | -1.4 | 124   | 143 | 0  | 79.2  | 22 | A | LVGADGIMIGTGLVGALTKV  | Y | 1.4   | 6.76 | Oxidation (M)            |
| 1   | P02945 BACR | 2 | 1911.0003 | -0.9 | 11    | 27  | 0  | 34.7  | 27 | E | GVSQAQITGRPEWIWLA     | L | 0.0   | 6.98 |                          |
| 1   | P02945 BACR | 2 | 1955.1125 | -1.1 | 123   | 143 | 0  | 105.1 | 21 | L | ALVGADGIMIGTGLVGALTKV | Y | 1.4   | 6.76 |                          |
| 1   | P02945 BACR | 2 | 1955.1383 | -1.5 | 98    | 114 | 0  | 29.8  | 19 | A | DWLFTTPLLLDLALLV      | D | 1.7   | 2.92 |                          |
| 1   | P02945 BACR | 2 | 1971.1075 | -0.1 | 123   | 143 | 0  | 83.1  | 23 | L | ALVGADGIMIGTGLVGALTKV | Y | 1.4   | 6.76 | Oxidation (M)            |
| 1   | P02945 BACR | 2 | 1972.0955 | 0.2  | 210   | 227 | 0  | 52.6  | 23 | A | GIVPLNIETLLFMVLDVS    | A | 1.5   | 3    |                          |
| 1   | P02945 BACR | 2 | 1980.0932 | 0.1  | 201   | 219 | 0  | 47.0  | 23 | V | VWLIGSEGAGIVPLNIETL   | L | 1.0   | 3.12 |                          |
| 1   | P02945 BACR | 2 | 2020.1033 | -0.5 | 95    | 111 | 0  | 85.3  | 25 | A | RYADWLFTTPLLLDLA      | L | 0.7   | 3.88 |                          |
| 1   | P02945 BACR | 2 | 2036.0111 | -0.4 | 73    | 91  | 0  | 66.7  | 28 | S | MLLGYGLTMVFPFGGEQNPI  | Y | 0.5   | 3.3  |                          |
| 1   | P02945 BACR | 2 | 2046.0826 | 0.6  | 191   | 209 | 0  | 43.8  | 27 | V | TVVLWSAYPVVWLIGSEGA   | G | 1.1   | 3.3  |                          |
| 1   | P02945 BACR | 2 | 2052.006  | -1.6 | 73    | 91  | 0  | 42.7  | 28 | S | MLLGYGLTMVFPFGGEQNPI  | Y | 0.5   | 3.3  | Oxidation (M)            |
| 1   | P02945 BACR | 2 | 2072.1228 | 0.0  | 205   | 224 | 0  | 30.7  | 26 | I | GSEGAGIVPLNIETLLFMVL  | D | 1.2   | 3.12 |                          |
| 1   | P02945 BACR | 3 | 2097.1391 | 1.0  | 112   | 132 | 0  | 59.8  | 25 | A | LLVDADQGTILALVGADGIMI | G | 1.4   | 2.82 |                          |

| hit | accession   | z | mass      | ppm  | start | end | mc | score | id | - | sequence                | + | gravy | pl    | modification  |
|-----|-------------|---|-----------|------|-------|-----|----|-------|----|---|-------------------------|---|-------|-------|---------------|
| 1   | P02945 BACR | 2 | 2098.9823 | -0.3 | 76    | 94  | 0  | 49.7  | 27 | L | GYGLTMVFPFGGEQNPIYWA    | R | 0.0   | 3.3   |               |
| 1   | P02945 BACR | 2 | 2113.1341 | -1.0 | 112   | 132 | 0  | 66.2  | 26 | A | LLVDADQGTILALVGADGIMI   | G | 1.4   | 2.82  | Oxidation (M) |
| 1   | P02945 BACR | 2 | 2114.9772 | -0.6 | 76    | 94  | 0  | 54.0  | 26 | L | GYGLTMVFPFGGEQNPIYWA    | R | 0.0   | 3.3   | Oxidation (M) |
| 1   | P02945 BACR | 2 | 2123.0431 | -0.9 | 72    | 91  | 0  | 63.9  | 29 | L | SMLLGYGLTMVFPFGGEQNPI   | Y | 0.4   | 3.3   |               |
| 1   | P02945 BACR | 2 | 2123.0973 | 0.8  | 45    | 64  | 0  | 35.4  | 28 | G | MGVSDPDAAKIFYAITTLVPA   | I | 0.2   | 6.8   |               |
| 1   | P02945 BACR | 2 | 2127.2245 | -0.5 | 187   | 204 | 0  | 70.4  | 21 | V | LRNVTVVLWSAYPVVWLI      | G | 1.4   | 9.84  |               |
| 1   | P02945 BACR | 2 | 2139.0381 | -1.2 | 72    | 91  | 0  | 49.3  | 28 | L | SMLLGYGLTMVFPFGGEQNPI   | Y | 0.4   | 3.3   | Oxidation (M) |
| 1   | P02945 BACR | 2 | 2141.135  | 0.3  | 92    | 108 | 0  | 42.7  | 27 | I | YWARYADWLFTTPLL         | D | 0.6   | 6.64  |               |
| 1   | P02945 BACR | 2 | 2189.2388 | -0.3 | 96    | 114 | 0  | 65.1  | 22 | R | YADWLFTTPLL             | D | 1.5   | 2.92  |               |
| 1   | P02945 BACR | 3 | 2226.2089 | 0.3  | 194   | 214 | 0  | 39.0  | 25 | V | LWSAYPVVWLIGSEGAGIVPL   | N | 1.1   | 3.3   |               |
| 1   | P02945 BACR | 2 | 2274.2044 | 0.1  | 60    | 80  | 0  | 54.1  | 27 | T | TLVPAIAFTMYLSMLLGYGLT   | M | 1.4   | 5.86  |               |
| 1   | P02945 BACR | 3 | 2329.243  | -1.0 | 231   | 252 | 0  | 28.8  | 27 | V | GFGILLRSRAIFGEAEAPEPS   | A | 0.3   | 4.56  |               |
| 1   | P02945 BACR | 2 | 2440.2831 | -0.3 | 92    | 111 | 0  | 52.3  | 27 | I | YWARYADWLFTTPLL         | L | 0.6   | 3.88  |               |
| 1   | P02945 BACR | 2 | 2528.3791 | -0.7 | 187   | 209 | 0  | 59.3  | 25 | V | LRNVTVVLWSAYPVVWLIGSEGA | G | 0.9   | 6.88  |               |
| 1   | P02945 BACR | 3 | 2839.5623 | 0.3  | 98    | 123 | 0  | 26.8  | 24 | A | DWLFTTPLL               | L | 1.1   | 2.74  |               |
| 1   | P02945 BACR | 3 | 3051.7148 | -1.9 | 98    | 125 | 0  | 25.8  | 23 | A | DWLFTTPLL               | G | 1.3   | 2.74  |               |
| 1   | P02945 BACR | 3 | 3158.7267 | -0.2 | 95    | 122 | 0  | 37.6  | 24 | A | RYADWLFTTPLL            | A | 0.8   | 3.42  |               |
| 1   | P02945 BACR | 2 | 3229.7638 | -2.1 | 95    | 123 | 0  | 39.0  | 25 | A | RYADWLFTTPLL            | L | 0.8   | 3.42  |               |
| 2   | P00772 ELA1 | 1 | 529.286   | -0.2 | 260   | 264 | 0  | 33.1  | 27 | I | NNVIA                   | S | 0.7   | 6.02  |               |
| 2   | P00772 ELA1 | 1 | 532.2646  | 0.8  | 157   | 161 | 0  | 32.6  | 26 | T | GWGLT                   | R | 0.3   | 6.02  |               |
| 2   | P00772 ELA1 | 1 | 540.3384  | 0.4  | 138   | 142 | 0  | 24.8  | 24 | L | GVLPR                   | A | 0.3   | 11.04 |               |
| 2   | P00772 ELA1 | 1 | 543.3268  | -0.7 | 119   | 123 | 0  | 32.6  | 30 | Y | DIAL                    | R | 2.1   | 3.1   |               |
| 2   | P00772 ELA1 | 1 | 633.3122  | 0.2  | 156   | 161 | 0  | 25.5  | 25 | I | TGWGLT                  | R | 0.1   | 6.02  |               |
| 2   | P00772 ELA1 | 1 | 642.3701  | -2.6 | 259   | 264 | 0  | 33.2  | 26 | W | INNVIA                  | S | 1.3   | 6.02  |               |
| 2   | P00772 ELA1 | 1 | 649.2894  | 0.5  | 64    | 68  | 0  | 31.2  | 26 | Q | NWVMT                   | A | 0.2   | 6.02  |               |
| 2   | P00772 ELA1 | 1 | 653.4224  | 0.9  | 137   | 142 | 0  | 34.5  | 21 | Q | LGVLPR                  | A | 0.9   | 11.04 |               |
| 2   | P00772 ELA1 | 1 | 665.2843  | -0.2 | 64    | 68  | 0  | 23.3  | 22 | Q | NWVMT                   | A | 0.2   | 6.02  | Oxidation (M) |
| 2   | P00772 ELA1 | 2 | 668.397   | 1.0  | 138   | 144 | 0  | 34.8  | 22 | L | GVLPRAG                 | T | 0.4   | 11.04 |               |
| 2   | P00772 ELA1 | 2 | 672.3919  | 0.1  | 124   | 129 | 0  | 33.3  | 29 | L | RLAQSV                  | T | 0.2   | 11.04 |               |
| 2   | P00772 ELA1 | 1 | 680.3533  | -0.7 | 255   | 259 | 0  | 22.8  | 18 | A | YISWI                   | N | 1.2   | 5.92  |               |
| 2   | P00772 ELA1 | 1 | 706.3901  | -1.0 | 118   | 123 | 0  | 25.9  | 25 | G | YDIAL                   | R | 1.5   | 3.1   |               |
| 2   | P00772 ELA1 | 1 | 716.3493  | 0.3  | 37    | 42  | 0  | 28.5  | 26 | N | SWPSQI                  | S | -0.5  | 6.02  |               |
| 2   | P00772 ELA1 | 1 | 720.3265  | -0.3 | 64    | 69  | 0  | 32.3  | 26 | Q | NWVMTA                  | A | 0.5   | 6.02  |               |
| 2   | P00772 ELA1 | 1 | 722.3599  | -0.1 | 132   | 137 | 0  | 26.5  | 26 | L | NSYVQL                  | G | -0.2  | 5.92  |               |
| 2   | P00772 ELA1 | 1 | 730.3609  | 0.4  | 260   | 266 | 0  | 43.2  | 30 | I | NNVIASN                 | - | -0.1  | 6.02  |               |
| 2   | P00772 ELA1 | 1 | 731.3602  | 0.0  | 257   | 262 | 0  | 37.8  | 26 | I | SWINNV                  | I | 0.0   | 6.02  |               |
| 2   | P00772 ELA1 | 1 | 736.3214  | -0.1 | 64    | 69  | 0  | 28.3  | 23 | Q | NWVMTA                  | A | 0.5   | 6.02  | Oxidation (M) |
| 2   | P00772 ELA1 | 2 | 751.3905  | 0.8  | 254   | 259 | 0  | 34.7  | 23 | S | AYISWI                  | N | 1.3   | 5.92  |               |
| 2   | P00772 ELA1 | 1 | 763.4116  | 0.1  | 117   | 123 | 0  | 41.6  | 26 | A | GYDIAL                  | R | 1.2   | 3.1   |               |
| 2   | P00772 ELA1 | 1 | 777.348   | 0.1  | 63    | 68  | 0  | 31.1  | 25 | R | QNWVMT                  | A | -0.4  | 6.02  |               |

| hit | accession   | z | mass      | ppm  | start | end | mc | score | id | - | sequence   | + | gravy | pl    | modification             |
|-----|-------------|---|-----------|------|-------|-----|----|-------|----|---|------------|---|-------|-------|--------------------------|
| 2   | P00772 ELA1 | 1 | 781.481   | 0.5  | 137   | 144 | 0  | 29.5  | 21 | Q | LGVLPRAG   | T | 0.8   | 11.04 |                          |
| 2   | P00772 ELA1 | 1 | 781.481   | -0.4 | 136   | 142 | 0  | 25.3  | 21 | V | QLGVLPR    | A | 0.3   | 11.04 |                          |
| 2   | P00772 ELA1 | 2 | 789.4133  | 1.6  | 156   | 162 | 0  | 40.0  | 26 | I | TGWGLTR    | T | -0.5  | 11.04 |                          |
| 2   | P00772 ELA1 | 1 | 793.3429  | -0.3 | 63    | 68  | 0  | 40.4  | 23 | R | QNWVMT     | A | -0.4  | 6.02  | Oxidation (M)            |
| 2   | P00772 ELA1 | 1 | 797.4759  | -1.3 | 141   | 148 | 0  | 23.2  | 23 | L | PRAGTILA   | N | 0.6   | 11.04 |                          |
| 2   | P00772 ELA1 | 2 | 808.4443  | -0.1 | 232   | 238 | 0  | 30.2  | 24 | V | TSFVSRL    | G | 0.6   | 11.04 |                          |
| 2   | P00772 ELA1 | 1 | 819.4127  | -0.1 | 172   | 178 | 0  | 29.4  | 28 | L | QQAYLPT    | V | -0.7  | 5.92  |                          |
| 2   | P00772 ELA1 | 1 | 828.4494  | 0.6  | 258   | 264 | 0  | 36.8  | 22 | S | WINNVIA    | S | 1.0   | 6.02  |                          |
| 2   | P00772 ELA1 | 1 | 830.3923  | 0.5  | 36    | 42  | 0  | 34.3  | 25 | R | NSWPSQI    | S | -0.9  | 6.02  |                          |
| 2   | P00772 ELA1 | 1 | 834.4487  | 0.8  | 116   | 123 | 0  | 52.2  | 26 | A | AGYDIALL   | R | 1.3   | 3.1   |                          |
| 2   | P00772 ELA1 | 2 | 838.4225  | 1.0  | 253   | 259 | 0  | 41.0  | 24 | V | SAYISWI    | N | 1.0   | 5.92  |                          |
| 2   | P00772 ELA1 | 2 | 843.445   | 2.0  | 164   | 171 | 0  | 51.9  | 30 | T | NGQLAQLT   | Q | -0.3  | 6.02  |                          |
| 2   | P00772 ELA1 | 2 | 844.4443  | 1.4  | 257   | 263 | 0  | 37.0  | 24 | I | SWINNVIA   | A | 0.6   | 6.02  |                          |
| 2   | P00772 ELA1 | 1 | 848.3851  | 0.1  | 63    | 69  | 0  | 26.8  | 26 | R | QNWVMTA    | A | -0.1  | 6.02  |                          |
| 2   | P00772 ELA1 | 2 | 862.4913  | 0.8  | 76    | 82  | 0  | 26.8  | 23 | R | ELTFRVV    | V | 0.9   | 6.98  |                          |
| 2   | P00772 ELA1 | 2 | 880.5494  | 0.2  | 135   | 142 | 0  | 29.1  | 17 | Y | VQLGVLPR   | A | 0.8   | 11.04 |                          |
| 2   | P00772 ELA1 | 2 | 882.5287  | 0.7  | 138   | 146 | 0  | 35.3  | 23 | L | GVLPRAGTI  | L | 0.7   | 11.04 |                          |
| 2   | P00772 ELA1 | 1 | 885.3869  | 0.2  | 187   | 194 | 0  | 28.1  | 24 | S | SSYWGSTV   | K | -0.2  | 5.92  |                          |
| 2   | P00772 ELA1 | 2 | 890.461   | -0.1 | 156   | 163 | 0  | 44.4  | 26 | I | TGWGLTRT   | N | -0.6  | 11.04 |                          |
| 2   | P00772 ELA1 | 1 | 892.4654  | 0.1  | 131   | 138 | 0  | 29.5  | 27 | T | LNSYVQLG   | V | 0.3   | 5.92  |                          |
| 2   | P00772 ELA1 | 1 | 892.5131  | -1.3 | 136   | 144 | 0  | 28.5  | 21 | V | RLGVLPRAG  | T | 0.4   | 11.04 | Gln->pyro-Glu (N-term Q) |
| 2   | P00772 ELA1 | 2 | 898.56    | 1.0  | 122   | 129 | 0  | 57.5  | 21 | A | LLRLAQSV   | T | 1.1   | 11.04 |                          |
| 2   | P00772 ELA1 | 1 | 909.5396  | 0.3  | 136   | 144 | 0  | 46.4  | 19 | V | QLGVLPRAG  | T | 0.4   | 11.04 |                          |
| 2   | P00772 ELA1 | 2 | 915.4814  | 1.4  | 257   | 264 | 0  | 52.6  | 24 | I | SWINNVIA   | S | 0.8   | 6.02  |                          |
| 2   | P00772 ELA1 | 2 | 936.4916  | 0.2  | 130   | 137 | 0  | 50.1  | 25 | V | TLNSYVQL   | G | 0.3   | 5.92  |                          |
| 2   | P00772 ELA1 | 2 | 940.4542  | 0.7  | 175   | 182 | 0  | 36.2  | 22 | A | YLPTVDYA   | I | 0.2   | 3.1   |                          |
| 2   | P00772 ELA1 | 2 | 943.4512  | -1.0 | 223   | 231 | 0  | 52.6  | 26 | V | NGQYAVHGV  | T | -0.2  | 7.76  |                          |
| 2   | P00772 ELA1 | 2 | 949.444   | -0.5 | 62    | 68  | 0  | 29.5  | 28 | I | RQNWVMT    | A | -1.0  | 11.04 | Oxidation (M)            |
| 2   | P00772 ELA1 | 2 | 972.4189  | -0.6 | 186   | 194 | 0  | 31.2  | 24 | S | SSSYWGSTV  | K | -0.3  | 5.92  |                          |
| 2   | P00772 ELA1 | 2 | 993.5131  | 3.2  | 130   | 138 | 0  | 54.2  | 25 | V | TLNSYVQLG  | V | 0.2   | 5.92  |                          |
| 2   | P00772 ELA1 | 2 | 995.6128  | -0.1 | 138   | 147 | 0  | 39.1  | 19 | L | GVLPRAGTIL | A | 1.1   | 11.04 |                          |
| 2   | P00772 ELA1 | 2 | 1000.5665 | -0.3 | 124   | 132 | 0  | 39.2  | 26 | L | RLAQSRTL   | S | 0.1   | 11.04 |                          |
| 2   | P00772 ELA1 | 2 | 1002.5134 | 0.9  | 257   | 265 | 0  | 50.7  | 28 | I | SWINNVIA   | N | 0.6   | 6.02  |                          |
| 2   | P00772 ELA1 | 1 | 1008.44   | -0.8 | 112   | 121 | 0  | 30.1  | 27 | T | DDVAAGYDIA | L | 0.2   | 2.82  |                          |
| 2   | P00772 ELA1 | 1 | 1008.608  | -2.0 | 135   | 144 | 0  | 41.8  | 15 | Y | VQLGVLPRAG | T | 0.7   | 11.04 |                          |
| 2   | P00772 ELA1 | 2 | 1009.6284 | 0.9  | 139   | 148 | 0  | 41.5  | 18 | G | VLPRAGTILA | N | 1.3   | 11.04 |                          |
| 2   | P00772 ELA1 | 2 | 1013.4818 | -0.1 | 187   | 195 | 0  | 49.0  | 26 | S | SSYWGSTVK  | N | -0.6  | 9.72  |                          |
| 2   | P00772 ELA1 | 2 | 1020.4811 | -1.1 | 62    | 69  | 0  | 35.7  | 27 | I | RQNWVMTA   | A | -0.7  | 11.04 | Oxidation (M)            |
| 2   | P00772 ELA1 | 2 | 1029.5203 | 1.0  | 27    | 36  | 0  | 84.2  | 28 | R | VVGGTEAQRN | S | -0.6  | 6.98  |                          |
| 2   | P00772 ELA1 | 1 | 1029.5243 | 1.7  | 258   | 266 | 0  | 38.6  | 25 | S | WINNVIASN  | - | 0.3   | 6.02  |                          |



| hit | accession   | z | mass      | ppm  | start | end | mc | score | id | - | sequence      | + | gravy | pl    | modification |
|-----|-------------|---|-----------|------|-------|-----|----|-------|----|---|---------------|---|-------|-------|--------------|
| 2   | P00772 ELA1 | 2 | 1043.6128 | 1.5  | 134   | 142 | 0  | 69.5  | 19 | S | YVQLGVLPR     | A | 0.5   | 9.84  |              |
| 2   | P00772 ELA1 | 2 | 1056.5564 | 1.2  | 165   | 174 | 0  | 36.7  | 27 | N | GQLAQLTQQA    | Y | -0.4  | 6.02  |              |
| 2   | P00772 ELA1 | 2 | 1066.6499 | 0.5  | 138   | 148 | 0  | 53.2  | 19 | L | GVLPRAGTILA   | N | 1.1   | 11.04 |              |
| 2   | P00772 ELA1 | 2 | 1078.5447 | 0.5  | 254   | 262 | 0  | 39.8  | 27 | S | AYISWINNV     | I | 0.6   | 5.92  |              |
| 2   | P00772 ELA1 | 2 | 1093.592  | 0.5  | 251   | 259 | 0  | 45.1  | 25 | T | RVSAYISWI     | N | 0.7   | 9.84  |              |
| 2   | P00772 ELA1 | 2 | 1100.5938 | -0.8 | 162   | 171 | 0  | 27.7  | 27 | T | RTNGQLAQT     | Q | -0.7  | 11.04 |              |
| 2   | P00772 ELA1 | 2 | 1103.6339 | 1.8  | 117   | 126 | 0  | 36.5  | 23 | A | GYDIALRLA     | Q | 1.0   | 6.7   |              |
| 2   | P00772 ELA1 | 1 | 1109.4877 | -0.2 | 111   | 121 | 0  | 27.1  | 26 | N | TDDVAAGYDIA   | L | 0.1   | 2.82  |              |
| 2   | P00772 ELA1 | 2 | 1116.5564 | 1.0  | 257   | 266 | 0  | 82.2  | 28 | I | SWINNVIASN    | - | 0.2   | 6.02  |              |
| 2   | P00772 ELA1 | 2 | 1123.6713 | 0.4  | 136   | 146 | 0  | 34.9  | 20 | V | QLGVLPRAGTI   | L | 0.6   | 11.04 |              |
| 2   | P00772 ELA1 | 2 | 1127.5247 | -1.2 | 187   | 196 | 0  | 33.8  | 26 | S | SSYWGSTVKN    | S | -0.9  | 9.72  |              |
| 2   | P00772 ELA1 | 2 | 1130.6448 | 0.6  | 133   | 142 | 0  | 68.1  | 23 | N | SYVQLGVLPR    | A | 0.4   | 9.84  |              |
| 2   | P00772 ELA1 | 2 | 1142.6196 | 1.1  | 57    | 66  | 0  | 41.7  | 27 | C | GGTLIRQNWV    | M | -0.1  | 11.04 |              |
| 2   | P00772 ELA1 | 2 | 1145.4778 | 2.2  | 106   | 114 | 0  | 53.2  | 22 | V | HPYWNTDDV     | A | -1.6  | 3.88  |              |
| 2   | P00772 ELA1 | 2 | 1170.5993 | 1.4  | 164   | 174 | 0  | 81.7  | 27 | T | NGQLAQLTQQA   | Y | -0.7  | 6.02  |              |
| 2   | P00772 ELA1 | 2 | 1171.6713 | 1.2  | 134   | 144 | 0  | 64.3  | 24 | S | YVQLGVLPRAG   | T | 0.6   | 9.84  |              |
| 2   | P00772 ELA1 | 2 | 1191.6288 | 1.1  | 254   | 263 | 0  | 80.9  | 27 | S | AYISWINNVI    | A | 1.0   | 5.92  |              |
| 2   | P00772 ELA1 | 2 | 1191.6288 | 0.7  | 255   | 264 | 0  | 61.0  | 26 | A | YISWINNVIA    | S | 1.0   | 5.92  |              |
| 2   | P00772 ELA1 | 2 | 1201.6819 | -0.6 | 133   | 143 | 0  | 48.3  | 23 | N | SYVQLGVLPR    | G | 0.5   | 9.84  |              |
| 2   | P00772 ELA1 | 2 | 1206.6033 | 0.5  | 225   | 235 | 0  | 42.8  | 27 | G | QYAVHGVTSFV   | S | 0.7   | 7.76  |              |
| 2   | P00772 ELA1 | 2 | 1214.5568 | 0.9  | 187   | 197 | 0  | 34.0  | 25 | S | SSYWGSTVKNS   | M | -0.9  | 9.72  |              |
| 2   | P00772 ELA1 | 2 | 1222.7398 | 0.9  | 135   | 146 | 0  | 25.3  | 18 | Y | VQLGVLPRAGTI  | L | 0.9   | 11.04 |              |
| 2   | P00772 ELA1 | 2 | 1226.7347 | 1.0  | 122   | 132 | 0  | 46.2  | 20 | A | LLRLAQSRTL    | S | 0.7   | 11.04 |              |
| 2   | P00772 ELA1 | 2 | 1230.6543 | -0.2 | 60    | 69  | 0  | 41.4  | 25 | T | LIRQNWVMTA    | A | 0.3   | 11.04 |              |
| 2   | P00772 ELA1 | 2 | 1240.5836 | 1.0  | 43    | 53  | 0  | 51.9  | 26 | I | SLQYRSGSSWA   | H | -0.7  | 9.84  |              |
| 2   | P00772 ELA1 | 2 | 1244.5462 | 1.0  | 105   | 114 | 0  | 52.7  | 25 | V | VHPYWNTDDV    | A | -1.0  | 3.88  |              |
| 2   | P00772 ELA1 | 2 | 1244.6877 | 0.6  | 132   | 142 | 0  | 108.4 | 25 | L | NSYVQLGVLPR   | A | 0.0   | 9.84  |              |
| 2   | P00772 ELA1 | 2 | 1245.7081 | 0.5  | 115   | 126 | 0  | 52.1  | 22 | V | AAGYDIALRLA   | Q | 1.1   | 6.7   |              |
| 2   | P00772 ELA1 | 2 | 1250.6507 | 0.3  | 127   | 137 | 0  | 67.0  | 26 | A | QSVTLNSYVQL   | G | 0.2   | 5.92  |              |
| 2   | P00772 ELA1 | 2 | 1258.7034 | 1.8  | 133   | 144 | 0  | 73.6  | 23 | N | SYVQLGVLPRAG  | T | 0.4   | 9.84  |              |
| 2   | P00772 ELA1 | 2 | 1260.6649 | -0.2 | 59    | 68  | 0  | 29.9  | 24 | G | TLIRQNWVMT    | A | 0.1   | 11.04 |              |
| 2   | P00772 ELA1 | 2 | 1262.6659 | 1.0  | 254   | 264 | 0  | 92.5  | 27 | S | AYISWINNVIA   | S | 1.0   | 5.92  |              |
| 2   | P00772 ELA1 | 2 | 1267.6085 | 0.6  | 172   | 182 | 0  | 56.2  | 26 | L | QQAYLPTVDYA   | I | -0.3  | 3.1   |              |
| 2   | P00772 ELA1 | 2 | 1271.647  | 0.2  | 163   | 174 | 0  | 63.2  | 27 | R | TNGQLAQLTQQA  | Y | -0.7  | 6.02  |              |
| 2   | P00772 ELA1 | 2 | 1278.6608 | 0.4  | 253   | 263 | 0  | 43.6  | 26 | V | SAYISWINNVI   | A | 0.8   | 5.92  |              |
| 2   | P00772 ELA1 | 2 | 1307.6721 | -0.6 | 127   | 138 | 0  | 41.4  | 26 | A | QSVTLNSYVQLG  | V | 0.1   | 5.92  |              |
| 2   | P00772 ELA1 | 2 | 1307.7925 | -1.5 | 136   | 148 | 0  | 64.9  | 18 | V | QLGVLPRAGTILA | N | 1.0   | 11.04 |              |
| 2   | P00772 ELA1 | 2 | 1314.6316 | 0.3  | 32    | 42  | 0  | 45.0  | 26 | T | EAQRNSWPSQI   | S | -1.5  | 6.98  |              |
| 2   | P00772 ELA1 | 2 | 1315.5833 | 0.2  | 105   | 115 | 0  | 29.1  | 25 | V | VHPYWNTDDVA   | A | -0.7  | 3.88  |              |
| 2   | P00772 ELA1 | 2 | 1331.702  | -0.2 | 59    | 69  | 0  | 40.7  | 25 | G | TLIRQNWVMTA   | A | 0.2   | 11.04 |              |

| hit | accession   | z | mass      | ppm  | start | end | mc | score | id | - | sequence        | + | gravy | pl    | modification  |
|-----|-------------|---|-----------|------|-------|-----|----|-------|----|---|-----------------|---|-------|-------|---------------|
| 2   | P00772 ELA1 | 2 | 1343.6146 | 1.1  | 104   | 114 | 0  | 66.0  | 26 | I | VVHPYWNTDDV     | A | -0.5  | 3.88  |               |
| 2   | P00772 ELA1 | 2 | 1347.6969 | 0.1  | 59    | 69  | 0  | 48.8  | 27 | G | TLIRQNVVMTA     | A | 0.2   | 11.04 | Oxidation (M) |
| 2   | P00772 ELA1 | 2 | 1349.6979 | -0.1 | 254   | 265 | 0  | 62.3  | 26 | S | AYISWINNVIAS    | N | 0.9   | 5.92  |               |
| 2   | P00772 ELA1 | 2 | 1349.6979 | -0.7 | 253   | 264 | 0  | 68.4  | 26 | V | SAYISWINNVIA    | S | 0.9   | 5.92  |               |
| 2   | P00772 ELA1 | 2 | 1349.7303 | -1.0 | 124   | 135 | 0  | 52.7  | 25 | L | RLAQSVTLNSYV    | Q | 0.2   | 9.84  |               |
| 2   | P00772 ELA1 | 2 | 1357.7718 | 0.1  | 131   | 142 | 0  | 83.7  | 22 | T | LNSYVQLGVLPR    | A | 0.4   | 9.84  |               |
| 2   | P00772 ELA1 | 2 | 1360.7714 | 0.4  | 118   | 129 | 0  | 52.6  | 22 | G | YDIALLRLAQSV    | T | 0.8   | 6.7   |               |
| 2   | P00772 ELA1 | 2 | 1372.7463 | 0.8  | 132   | 144 | 0  | 90.2  | 25 | L | NSYVQLGVLPRAG   | T | 0.1   | 9.84  |               |
| 2   | P00772 ELA1 | 2 | 1373.7052 | 0.7  | 156   | 168 | 0  | 68.0  | 27 | I | TGWGLTRTNGQLA   | Q | -0.5  | 11.04 |               |
| 2   | P00772 ELA1 | 2 | 1377.6677 | 1.5  | 223   | 235 | 0  | 58.1  | 28 | V | NGQYAVHGVTSFV   | S | 0.3   | 7.76  |               |
| 2   | P00772 ELA1 | 2 | 1385.8031 | 0.9  | 134   | 146 | 0  | 58.7  | 21 | S | YVQLGVLPRAGTI   | L | 0.8   | 9.84  |               |
| 2   | P00772 ELA1 | 2 | 1386.6204 | -0.5 | 105   | 116 | 0  | 50.9  | 24 | V | VHPYWNTDDVAA    | G | -0.5  | 3.88  |               |
| 2   | P00772 ELA1 | 2 | 1392.7037 | 0.6  | 255   | 266 | 0  | 47.9  | 28 | A | YISWINNVIASN    | - | 0.4   | 5.92  |               |
| 2   | P00772 ELA1 | 2 | 1406.8609 | 0.3  | 135   | 148 | 0  | 40.2  | 16 | Y | VQLGVLPRAGTILA  | N | 1.2   | 11.04 |               |
| 2   | P00772 ELA1 | 2 | 1414.6517 | -2.1 | 104   | 115 | 0  | 62.1  | 25 | I | VVHPYWNTDDVA    | A | -0.3  | 3.88  |               |
| 2   | P00772 ELA1 | 2 | 1417.7929 | 0.6  | 117   | 129 | 0  | 52.0  | 23 | A | GYDIALLRLAQSV   | T | 0.7   | 6.7   |               |
| 2   | P00772 ELA1 | 2 | 1434.7653 | 1.0  | 238   | 250 | 0  | 26.5  | 25 | R | LGCNVTRKPTVFT   | R | 0.1   | 10.1  |               |
| 2   | P00772 ELA1 | 2 | 1436.7299 | 1.2  | 253   | 265 | 0  | 31.2  | 27 | V | SAYISWINNVIAS   | N | 0.7   | 5.92  |               |
| 2   | P00772 ELA1 | 2 | 1444.6657 | 0.3  | 187   | 199 | 0  | 48.3  | 26 | S | SSYWGSTVKNSMV   | C | -0.3  | 9.72  |               |
| 2   | P00772 ELA1 | 2 | 1456.6987 | 0.3  | 103   | 114 | 0  | 63.9  | 27 | K | IVVHPYWNTDDV    | A | -0.1  | 3.88  |               |
| 2   | P00772 ELA1 | 2 | 1458.8195 | 0.4  | 130   | 142 | 0  | 84.8  | 23 | V | TLNSYVQLGVLPR   | A | 0.3   | 9.84  |               |
| 2   | P00772 ELA1 | 2 | 1463.7408 | -0.3 | 254   | 266 | 0  | 81.0  | 27 | S | AYISWINNVIASN   | - | 0.5   | 5.92  |               |
| 2   | P00772 ELA1 | 2 | 1472.8351 | 2.6  | 133   | 146 | 0  | 95.8  | 22 | N | SYVQLGVLPRAGTI  | L | 0.7   | 9.84  |               |
| 2   | P00772 ELA1 | 2 | 1481.7263 | -0.1 | 41    | 53  | 0  | 63.6  | 26 | S | QISLQYRSGSSWA   | H | -0.6  | 9.84  |               |
| 2   | P00772 ELA1 | 2 | 1485.6889 | -1.1 | 104   | 116 | 0  | 55.0  | 25 | I | VVHPYWNTDDVAA   | G | -0.2  | 3.88  |               |
| 2   | P00772 ELA1 | 2 | 1485.8304 | -0.3 | 131   | 144 | 0  | 76.9  | 23 | T | LNSYVQLGVLPRAG  | T | 0.4   | 9.84  |               |
| 2   | P00772 ELA1 | 2 | 1486.7165 | -0.9 | 27    | 40  | 0  | 29.5  | 28 | R | VVGTEAQRNSWPS   | Q | -0.7  | 6.98  |               |
| 2   | P00772 ELA1 | 2 | 1488.83   | -0.2 | 116   | 129 | 0  | 27.7  | 23 | A | AGYDIALLRLAQSV  | T | 0.8   | 6.7   |               |
| 2   | P00772 ELA1 | 2 | 1527.7358 | 0.3  | 103   | 115 | 0  | 27.9  | 27 | K | IVVHPYWNTDDVA   | A | 0.1   | 3.88  |               |
| 2   | P00772 ELA1 | 2 | 1529.7223 | -0.4 | 29    | 42  | 0  | 51.8  | 27 | V | GGTEAQRNSWPSQI  | S | -1.3  | 6.98  |               |
| 2   | P00772 ELA1 | 2 | 1529.8566 | 2.5  | 130   | 143 | 0  | 70.3  | 24 | V | TLNSYVQLGVLPR   | G | 0.4   | 9.84  |               |
| 2   | P00772 ELA1 | 1 | 1542.7103 | -1.9 | 104   | 117 | 0  | 34.5  | 26 | I | VVHPYWNTDDVAAG  | Y | -0.2  | 3.88  |               |
| 2   | P00772 ELA1 | 2 | 1550.7729 | 0.5  | 253   | 266 | 0  | 87.7  | 27 | V | SAYISWINNVIASN  | - | 0.4   | 5.92  |               |
| 2   | P00772 ELA1 | 2 | 1553.6706 | -1.0 | 83    | 96  | 0  | 65.0  | 24 | V | VGEHNLNQNDGTEQ  | Y | -1.8  | 3.82  |               |
| 2   | P00772 ELA1 | 2 | 1559.8671 | 1.0  | 115   | 129 | 0  | 49.2  | 23 | V | AAGYDIALLRLAQSV | T | 0.9   | 6.7   |               |
| 2   | P00772 ELA1 | 2 | 1569.9243 | -0.1 | 134   | 148 | 0  | 86.4  | 20 | S | YVQLGVLPRAGTILA | N | 1.0   | 9.84  |               |
| 2   | P00772 ELA1 | 2 | 1586.878  | 0.6  | 132   | 146 | 0  | 31.6  | 24 | L | NSYVQLGVLPRAGTI | L | 0.4   | 9.84  |               |
| 2   | P00772 ELA1 | 2 | 1586.878  | 0.4  | 130   | 144 | 0  | 109.8 | 24 | V | TLNSYVQLGVLPRAG | T | 0.3   | 9.84  |               |
| 2   | P00772 ELA1 | 2 | 1590.8729 | 0.4  | 124   | 137 | 0  | 85.0  | 25 | L | RLAQSVTLNSYVQL  | G | 0.2   | 9.84  |               |
| 2   | P00772 ELA1 | 2 | 1598.7729 | 0.3  | 103   | 116 | 0  | 36.2  | 27 | K | IVVHPYWNTDDVAA  | G | 0.2   | 3.88  |               |

| hit | accession   | z | mass      | ppm  | start | end | mc | score | id | - | sequence            | + | gravy | pl    | modification             |
|-----|-------------|---|-----------|------|-------|-----|----|-------|----|---|---------------------|---|-------|-------|--------------------------|
| 2   | P00772 ELA1 | 2 | 1602.8114 | -0.2 | 156   | 170 | 0  | 74.8  | 28 | I | TGWGLTRTNGQLAQT     | L | -0.7  | 11.04 |                          |
| 2   | P00772 ELA1 | 2 | 1604.8674 | -0.2 | 251   | 264 | 0  | 57.3  | 25 | T | RVSAYISWINNVIA      | S | 0.7   | 9.84  |                          |
| 2   | P00772 ELA1 | 2 | 1609.7988 | 0.4  | 169   | 182 | 0  | 45.5  | 28 | A | QTLQQAYLPTVDYA      | I | -0.3  | 3.1   |                          |
| 2   | P00772 ELA1 | 2 | 1628.7907 | -1.9 | 28    | 42  | 0  | 56.5  | 28 | V | VGGTEAQRNSWPSQI     | S | -0.9  | 6.98  |                          |
| 2   | P00772 ELA1 | 2 | 1644.8471 | 0.2  | 164   | 178 | 0  | 34.8  | 28 | T | NGQLAQLTQQAYLPT     | V | -0.5  | 5.92  |                          |
| 2   | P00772 ELA1 | 2 | 1647.8944 | -0.5 | 124   | 138 | 0  | 72.4  | 25 | L | RLAQSVTLNSYVQLG     | V | 0.2   | 9.84  |                          |
| 2   | P00772 ELA1 | 2 | 1649.8413 | 0.4  | 252   | 266 | 0  | 74.1  | 27 | R | VSAYISWINNVIASN     | - | 0.7   | 5.92  |                          |
| 2   | P00772 ELA1 | 2 | 1656.9563 | 1.7  | 133   | 148 | 0  | 89.5  | 21 | N | SYVQLGVLPRAGTILA    | N | 0.9   | 9.84  |                          |
| 2   | P00772 ELA1 | 2 | 1659.7125 | -1.1 | 85    | 98  | 0  | 45.8  | 22 | G | EHNLNQNDGTEQYV      | G | -1.8  | 3.82  |                          |
| 2   | P00772 ELA1 | 2 | 1685.9465 | -1.4 | 129   | 144 | 0  | 39.2  | 23 | S | VTLSYVQLGVLPRAG     | T | 0.6   | 9.84  |                          |
| 2   | P00772 ELA1 | 2 | 1691.8115 | -1.1 | 89    | 103 | 0  | 27.3  | 27 | L | NQNDGTEQYVGVQKI     | V | -1.2  | 4.08  |                          |
| 2   | P00772 ELA1 | 2 | 1695.8257 | -2.1 | 101   | 114 | 0  | 58.0  | 27 | V | QKIVVHPYWNTDDV      | A | -0.6  | 5.1   | Gln->pyro-Glu (N-term Q) |
| 2   | P00772 ELA1 | 2 | 1712.8522 | 0.2  | 101   | 114 | 0  | 48.2  | 28 | V | QKIVVHPYWNTDDV      | A | -0.6  | 5.1   |                          |
| 2   | P00772 ELA1 | 2 | 1715.8955 | 1.5  | 156   | 171 | 0  | 58.2  | 27 | I | TGWGLTRTNGQLAQLT    | Q | -0.4  | 11.04 |                          |
| 2   | P00772 ELA1 | 2 | 1727.8591 | 0.1  | 27    | 42  | 0  | 99.7  | 28 | R | VVGGTEAQRNSWPSQI    | S | -0.6  | 6.98  |                          |
| 2   | P00772 ELA1 | 2 | 1770.9992 | -0.3 | 132   | 148 | 0  | 110.7 | 23 | L | NSYVQLGVLPRAGTILA   | N | 0.7   | 9.84  |                          |
| 2   | P00772 ELA1 | 2 | 1772.9785 | -0.2 | 127   | 142 | 0  | 110.8 | 24 | A | QSVTLNSYVQLGVLPR    | A | 0.2   | 9.84  |                          |
| 2   | P00772 ELA1 | 2 | 1801.0098 | 0.3  | 130   | 146 | 0  | 95.5  | 22 | V | TLNSYVQLGVLPRAGTI   | L | 0.5   | 9.84  |                          |
| 2   | P00772 ELA1 | 2 | 1805.9424 | -1.4 | 251   | 266 | 0  | 92.1  | 27 | T | RVSAYISWINNVIASN    | - | 0.4   | 9.84  |                          |
| 2   | P00772 ELA1 | 2 | 1806.7849 | -0.3 | 106   | 121 | 0  | 26.0  | 24 | V | HPYWNTDDVAAGYDIA    | L | -0.6  | 3.6   |                          |
| 2   | P00772 ELA1 | 2 | 1814.8911 | -0.3 | 27    | 43  | 0  | 48.4  | 28 | R | VVGGTEAQRNSWPSQIS   | L | -0.6  | 6.98  |                          |
| 2   | P00772 ELA1 | 2 | 1815.8024 | 0.4  | 85    | 100 | 0  | 77.1  | 25 | G | EHNLNQNDGTEQYVGV    | Q | -1.4  | 3.82  |                          |
| 2   | P00772 ELA1 | 2 | 1815.8024 | 0.2  | 83    | 98  | 0  | 63.2  | 25 | V | VGEHNLNQNDGTEQYV    | G | -1.4  | 3.82  |                          |
| 2   | P00772 ELA1 | 2 | 1837.8999 | -2.0 | 101   | 116 | 0  | 43.2  | 27 | V | QKIVVHPYWNTDDVAA    | G | -0.3  | 5.1   | Gln->pyro-Glu (N-term Q) |
| 2   | P00772 ELA1 | 2 | 1844.0156 | 0.0  | 126   | 142 | 0  | 93.2  | 24 | L | AQSVTLNSYVQLGVLPR   | A | 0.3   | 9.84  |                          |
| 2   | P00772 ELA1 | 2 | 1854.9265 | -2.4 | 101   | 116 | 0  | 40.5  | 28 | V | QKIVVHPYWNTDDVAA    | G | -0.3  | 5.1   |                          |
| 2   | P00772 ELA1 | 2 | 1868.9421 | -0.1 | 99    | 114 | 0  | 42.7  | 28 | V | GVQKIVVHPYWNTDDV    | A | -0.3  | 5.1   |                          |
| 2   | P00772 ELA1 | 2 | 1872.8238 | 1.6  | 84    | 100 | 0  | 71.1  | 25 | V | GEHNLNQNDGTEQYVGV   | Q | -1.3  | 3.82  |                          |
| 2   | P00772 ELA1 | 2 | 1884.0833 | -0.4 | 131   | 148 | 0  | 62.4  | 21 | T | LNSYVQLGVLPRAGTILA  | N | 0.8   | 9.84  |                          |
| 2   | P00772 ELA1 | 2 | 1901.0371 | -2.1 | 127   | 144 | 0  | 111.1 | 25 | A | QSVTLNSYVQLGVLPRAG  | T | 0.3   | 9.84  |                          |
| 2   | P00772 ELA1 | 2 | 1905.8533 | -1.0 | 105   | 121 | 0  | 54.9  | 26 | V | VHPYWNTDDVAAGYDIA   | L | -0.3  | 3.6   |                          |
| 2   | P00772 ELA1 | 2 | 1911.9479 | -2.2 | 101   | 117 | 0  | 32.0  | 27 | V | QKIVVHPYWNTDDVAAG   | Y | -0.3  | 5.1   |                          |
| 2   | P00772 ELA1 | 2 | 1914.0938 | -1.4 | 130   | 147 | 0  | 57.8  | 21 | V | TLNSYVQLGVLPRAGTIL  | A | 0.7   | 9.84  |                          |
| 2   | P00772 ELA1 | 2 | 1914.8708 | -0.6 | 82    | 98  | 0  | 77.6  | 26 | V | VVGEHNLNQNDGTEQYV   | G | -1.0  | 3.82  |                          |
| 2   | P00772 ELA1 | 2 | 1914.8708 | -0.9 | 81    | 97  | 0  | 27.6  | 26 | R | VVGEHNLNQNDGTEQY    | V | -1.0  | 3.82  |                          |
| 2   | P00772 ELA1 | 2 | 1918.9385 | -1.5 | 87    | 103 | 0  | 76.7  | 29 | H | NLNQNDGTEQYVGVQKI   | V | -1.1  | 4.08  |                          |
| 2   | P00772 ELA1 | 2 | 1933.8847 | -1.9 | 104   | 120 | 0  | 51.7  | 27 | I | VVHPYWNTDDVAAGYDI   | A | -0.2  | 3.6   |                          |
| 2   | P00772 ELA1 | 1 | 1971.8923 | -2.8 | 83    | 100 | 0  | 83.1  | 26 | V | VGEHNLNQNDGTEQYVGV  | Q | -1.0  | 3.82  |                          |
| 2   | P00772 ELA1 | 2 | 1971.8923 | 0.2  | 82    | 99  | 0  | 34.4  | 26 | V | VVGEHNLNQNDGTEQYVG  | V | -1.0  | 3.82  |                          |
| 2   | P00772 ELA1 | 2 | 1972.0742 | -0.6 | 126   | 144 | 0  | 69.7  | 25 | L | AQSVTLNSYVQLGVLPRAG | T | 0.3   | 9.84  |                          |

| hit | accession   | z | mass      | ppm  | start | end | mc | score | id | - | sequence                 | + | gravy | pl    | modification             |
|-----|-------------|---|-----------|------|-------|-----|----|-------|----|---|--------------------------|---|-------|-------|--------------------------|
| 2   | P00772 ELA1 | 2 | 1985.131  | 2.2  | 130   | 148 | 0  | 78.2  | 22 | V | TLNSYVQLGVLPRAGTILA      | N | 0.8   | 9.84  |                          |
| 2   | P00772 ELA1 | 2 | 2004.9218 | 2.5  | 104   | 121 | 0  | 71.7  | 28 | I | VVHPYWNTDDVAAGYDIA       | L | -0.1  | 3.6   |                          |
| 2   | P00772 ELA1 | 2 | 2013.9392 | -0.4 | 81    | 98  | 0  | 54.9  | 27 | R | VVGEHNLNQNNDGTEQYV       | G | -0.7  | 3.82  |                          |
| 2   | P00772 ELA1 | 2 | 2043.0498 | -1.4 | 156   | 174 | 0  | 82.5  | 29 | I | TGWGLTRTNGQLAQLTQQA      | Y | -0.6  | 11.04 |                          |
| 2   | P00772 ELA1 | 3 | 2054.977  | 0.6  | 79    | 96  | 0  | 41.7  | 28 | T | FRVVVGEHNLNQNNDGTEQ      | Y | -1.0  | 4.42  |                          |
| 2   | P00772 ELA1 | 2 | 2070.9607 | -0.5 | 82    | 100 | 0  | 63.2  | 27 | V | VGEHNLNQNNDGTEQYVGV      | Q | -0.7  | 3.82  |                          |
| 2   | P00772 ELA1 | 2 | 2093.0429 | -1.0 | 164   | 182 | 0  | 93.2  | 28 | T | NGQLAQLTQQAYLPTVDYA      | I | -0.3  | 3.1   |                          |
| 2   | P00772 ELA1 | 2 | 2098.1423 | -1.7 | 127   | 146 | 0  | 57.1  | 25 | A | QSVTLNSYVQLGVLPRAGTI     | L | 0.4   | 9.84  | Gln->pyro-Glu (N-term Q) |
| 2   | P00772 ELA1 | 2 | 2099.9508 | -1.0 | 83    | 101 | 0  | 76.2  | 26 | V | VGEHNLNQNNDGTEQYVGVQ     | K | -1.1  | 3.82  |                          |
| 2   | P00772 ELA1 | 2 | 2115.1688 | 0.0  | 127   | 146 | 0  | 86.6  | 23 | A | QSVTLNSYVQLGVLPRAGTI     | L | 0.4   | 9.84  |                          |
| 2   | P00772 ELA1 | 2 | 2118.0058 | -0.3 | 103   | 121 | 0  | 73.7  | 28 | K | IVVHPYWNTDDVAAGYDIA      | L | 0.2   | 3.6   |                          |
| 2   | P00772 ELA1 | 2 | 2118.0058 | -1.9 | 104   | 122 | 0  | 57.8  | 28 | I | VVHPYWNTDDVAAGYDIAL      | L | 0.2   | 3.6   |                          |
| 2   | P00772 ELA1 | 2 | 2132.0215 | 0.4  | 105   | 123 | 0  | 51.4  | 29 | V | VHPYWNTDDVAAGYDIALL      | R | 0.1   | 3.6   |                          |
| 2   | P00772 ELA1 | 3 | 2156.0247 | -0.7 | 78    | 96  | 0  | 32.4  | 28 | L | TFRVVVGEHNLNQNNDGTEQ     | Y | -1.0  | 4.42  |                          |
| 2   | P00772 ELA1 | 2 | 2170.0291 | -0.2 | 81    | 100 | 0  | 45.6  | 28 | R | VVGEHNLNQNNDGTEQYVGV     | Q | -0.5  | 3.82  |                          |
| 2   | P00772 ELA1 | 3 | 2170.0403 | -1.0 | 80    | 98  | 0  | 30.3  | 28 | F | RVVVGEHNLNQNNDGTEQYV     | G | -0.9  | 4.42  |                          |
| 2   | P00772 ELA1 | 3 | 2185.04   | -1.0 | 85    | 103 | 0  | 61.2  | 28 | G | EHNLNQNNDGTEQYVGVQKI     | V | -1.3  | 4.42  |                          |
| 2   | P00772 ELA1 | 2 | 2199.0193 | -0.3 | 82    | 101 | 0  | 74.7  | 27 | V | VVGEHNLNQNNDGTEQYVGVQ    | K | -0.9  | 3.82  |                          |
| 2   | P00772 ELA1 | 2 | 2231.0899 | -1.3 | 104   | 123 | 0  | 50.0  | 29 | I | VVHPYWNTDDVAAGYDIALL     | R | 0.3   | 3.6   |                          |
| 2   | P00772 ELA1 | 3 | 2241.2593 | 0.0  | 124   | 144 | 0  | 47.5  | 23 | L | RLAQSVTLNSYVQLGVLPRAG    | T | 0.3   | 11.14 |                          |
| 2   | P00772 ELA1 | 3 | 2242.0614 | -1.2 | 84    | 103 | 0  | 45.4  | 28 | V | GEHNLNQNNDGTEQYVGVQKI    | V | -1.3  | 4.42  |                          |
| 2   | P00772 ELA1 | 2 | 2299.29   | -0.7 | 127   | 148 | 0  | 92.9  | 23 | A | QSVTLNSYVQLGVLPRAGTILA   | N | 0.6   | 9.84  |                          |
| 2   | P00772 ELA1 | 2 | 2317.1087 | -2.1 | 79    | 98  | 0  | 84.0  | 29 | T | FRVVVGEHNLNQNNDGTEQYV    | G | -0.8  | 4.42  |                          |
| 2   | P00772 ELA1 | 3 | 2327.1142 | -0.1 | 82    | 102 | 0  | 31.1  | 28 | V | VVGEHNLNQNNDGTEQYVGVQK   | I | -1.0  | 4.42  |                          |
| 2   | P00772 ELA1 | 2 | 2341.1299 | -1.4 | 83    | 103 | 0  | 83.2  | 29 | V | VGEHNLNQNNDGTEQYVGVQKI   | V | -1.0  | 4.42  |                          |
| 2   | P00772 ELA1 | 2 | 2344.1739 | -0.3 | 103   | 123 | 0  | 34.8  | 29 | K | IVVHPYWNTDDVAAGYDIALL    | R | 0.5   | 3.6   |                          |
| 2   | P00772 ELA1 | 2 | 2357.1328 | -1.6 | 101   | 121 | 0  | 52.4  | 29 | V | QKIVVHPYWNTDDVAAGYDIA    | L | -0.2  | 4.16  | Gln->pyro-Glu (N-term Q) |
| 2   | P00772 ELA1 | 2 | 2374.1594 | 0.5  | 101   | 121 | 0  | 41.4  | 29 | V | QKIVVHPYWNTDDVAAGYDIA    | L | -0.2  | 4.16  |                          |
| 2   | P00772 ELA1 | 2 | 2440.1983 | -1.5 | 82    | 103 | 0  | 94.6  | 28 | V | VVGEHNLNQNNDGTEQYVGVQKI  | V | -0.8  | 4.42  |                          |
| 2   | P00772 ELA1 | 3 | 2473.1986 | -0.2 | 79    | 100 | 0  | 71.3  | 29 | T | FRVVVGEHNLNQNNDGTEQYVGV  | Q | -0.5  | 4.42  |                          |
| 2   | P00772 ELA1 | 3 | 2539.2667 | 0.2  | 81    | 103 | 0  | 56.4  | 28 | R | VVGEHNLNQNNDGTEQYVGVQKI  | V | -0.5  | 4.42  |                          |
| 2   | P00772 ELA1 | 3 | 2574.2463 | 2.3  | 78    | 100 | 0  | 41.2  | 29 | L | TFRVVVGEHNLNQNNDGTEQYVGV | Q | -0.5  | 4.42  |                          |
| 3   | Q9HM69 CSG  | 1 | 541.3112  | 0.7  | 740   | 744 | 0  | 26.5  | 26 | S | VDVPL                    | S | 1.4   | 3.1   |                          |
| 3   | Q9HM69 CSG  | 1 | 636.3119  | 0.2  | 132   | 137 | 0  | 43.8  | 30 | A | DFGVTV                   | Q | 1.1   | 3.1   |                          |
| 3   | Q9HM69 CSG  | 1 | 706.3901  | -0.3 | 349   | 354 | 0  | 40.7  | 25 | A | YAIVEI                   | D | 1.7   | 3.3   |                          |
| 3   | Q9HM69 CSG  | 1 | 830.4749  | -1.3 | 679   | 686 | 0  | 26.9  | 24 | R | LVDGLTTI                 | E | 1.4   | 3.1   |                          |
| 3   | Q9HM69 CSG  | 1 | 832.4178  | -1.7 | 667   | 674 | 0  | 42.8  | 28 | T | ASDDLIVT                 | Q | 0.7   | 2.92  |                          |
| 3   | Q9HM69 CSG  | 2 | 905.5334  | -0.7 | 500   | 507 | 0  | 39.7  | 21 | G | TYRLGIIA                 | K | 1.0   | 9.84  |                          |
| 3   | Q9HM69 CSG  | 1 | 943.4862  | 0.6  | 766   | 773 | 0  | 50.8  | 28 | Q | NVEIVEEL                 | E | 0.3   | 3.02  |                          |
| 3   | Q9HM69 CSG  | 2 | 986.5761  | 0.8  | 678   | 686 | 0  | 53.3  | 24 | F | RLVDGLTTI                | E | 0.7   | 6.78  |                          |

| hit | accession  | z | mass      | ppm  | start | end | mc | score | id | - | sequence          | + | gravy | pl   | modification |
|-----|------------|---|-----------|------|-------|-----|----|-------|----|---|-------------------|---|-------|------|--------------|
| 3   | Q9HM69 CSG | 2 | 1025.5029 | 0.2  | 741   | 750 | 0  | 43.2  | 25 | V | DVPLSNVEPG        | N | -0.3  | 3    |              |
| 3   | Q9HM69 CSG | 2 | 1074.5822 | 1.9  | 675   | 683 | 0  | 49.7  | 25 | T | QQFRLVDGL         | T | -0.1  | 6.78 |              |
| 3   | Q9HM69 CSG | 2 | 1119.4931 | 0.4  | 632   | 641 | 0  | 67.0  | 25 | A | NSISDLEDEV        | G | -0.7  | 2.84 |              |
| 3   | Q9HM69 CSG | 2 | 1120.5149 | 0.7  | 453   | 461 | 0  | 26.6  | 26 | A | RDNNDFFELV        | T | -1.2  | 3.7  |              |
| 3   | Q9HM69 CSG | 2 | 1124.5714 | 0.3  | 740   | 750 | 0  | 56.0  | 25 | S | VDVPLSNVEPG       | N | 0.1   | 3    |              |
| 3   | Q9HM69 CSG | 2 | 1175.6299 | 0.5  | 675   | 684 | 0  | 36.6  | 25 | T | QQFRLVDGLT        | T | -0.2  | 6.78 |              |
| 3   | Q9HM69 CSG | 2 | 1186.6081 | 0.5  | 716   | 726 | 0  | 70.5  | 28 | V | ELLQGDASIEI       | N | 0.3   | 2.94 |              |
| 3   | Q9HM69 CSG | 2 | 1186.6557 | -0.4 | 678   | 688 | 0  | 40.1  | 25 | F | RLVDGLTTIEA       | T | 0.4   | 4.08 |              |
| 3   | Q9HM69 CSG | 2 | 1191.552  | -0.3 | 452   | 461 | 0  | 31.9  | 26 | Y | ARDNNDFFELV       | T | -0.9  | 3.7  |              |
| 3   | Q9HM69 CSG | 2 | 1200.5623 | 0.5  | 417   | 428 | 0  | 48.9  | 26 | T | QGDITLDNPTGA      | Y | -0.6  | 2.92 |              |
| 3   | Q9HM69 CSG | 2 | 1204.6299 | 0.2  | 536   | 546 | 0  | 58.4  | 26 | S | SIRVTDELTA        | S | 0.0   | 4.08 |              |
| 3   | Q9HM69 CSG | 2 | 1211.6034 | -1.2 | 739   | 750 | 0  | 43.5  | 26 | W | SVDVPLSNVEPG      | N | 0.1   | 3    |              |
| 3   | Q9HM69 CSG | 1 | 1229.4572 | 0.8  | 406   | 416 | 0  | 17.7  | 13 | V | STDDTDFDVT        | Q | -1.2  | 2.68 |              |
| 3   | Q9HM69 CSG | 2 | 1261.703  | -0.5 | 676   | 686 | 0  | 41.7  | 24 | Q | QFRLVDGLTTI       | E | 0.5   | 6.78 |              |
| 3   | Q9HM69 CSG | 1 | 1266.5252 | 0.9  | 238   | 249 | 0  | 37.7  | 23 | V | EGVEDLDFGDAT      | E | -0.5  | 2.76 |              |
| 3   | Q9HM69 CSG | 2 | 1276.5783 | 0.8  | 687   | 700 | 0  | 54.8  | 26 | I | EATEGGEAGGSLTV    | M | -0.2  | 3.02 |              |
| 3   | Q9HM69 CSG | 2 | 1287.7034 | 0.8  | 678   | 689 | 0  | 50.5  | 25 | F | RLVDGLTTIEAT      | E | 0.3   | 4.08 |              |
| 3   | Q9HM69 CSG | 2 | 1291.662  | 0.3  | 535   | 546 | 0  | 38.2  | 27 | T | SSIRVTDELTA       | S | -0.1  | 4.08 |              |
| 3   | Q9HM69 CSG | 2 | 1299.4627 | 0.6  | 593   | 603 | 0  | 33.1  | 13 | V | DSDDTFDEEDI       | D | -1.7  | 2.64 |              |
| 3   | Q9HM69 CSG | 1 | 1313.4783 | -2.6 | 472   | 482 | 0  | 31.6  | 14 | V | DSDDTFEEDI        | T | -1.7  | 2.66 |              |
| 3   | Q9HM69 CSG | 2 | 1320.631  | -0.6 | 453   | 463 | 0  | 32.0  | 27 | A | RDNNDFFELTV       | D | -0.7  | 3.7  |              |
| 3   | Q9HM69 CSG | 2 | 1327.6256 | -0.5 | 486   | 499 | 0  | 42.8  | 26 | S | DGDKGGDDILGLPG    | T | -0.7  | 3.42 |              |
| 3   | Q9HM69 CSG | 2 | 1342.6728 | 0.9  | 763   | 773 | 0  | 37.0  | 27 | T | DRQNVEIVEEL       | E | -0.8  | 3.68 |              |
| 3   | Q9HM69 CSG | 2 | 1389.7616 | -0.5 | 675   | 686 | 0  | 60.6  | 25 | T | QQFRLVDGLTTI      | E | 0.2   | 6.78 |              |
| 3   | Q9HM69 CSG | 2 | 1447.7341 | 1.3  | 312   | 325 | 0  | 32.0  | 28 | V | MRSVGDTVDTGLVV    | D | 0.6   | 3.88 |              |
| 3   | Q9HM69 CSG | 2 | 1467.6994 | -2.5 | 450   | 461 | 0  | 38.6  | 27 | V | LYARDNNDFFELV     | T | -0.6  | 3.7  |              |
| 3   | Q9HM69 CSG | 1 | 1485.5631 | 0.9  | 591   | 603 | 0  | 38.4  | 16 | I | SVSDDTFDEEDI      | D | -1.2  | 2.64 |              |
| 3   | Q9HM69 CSG | 2 | 1527.659  | 0.1  | 39    | 50  | 0  | 35.6  | 24 | S | DLNDYQRFNENT      | N | -2.0  | 3.7  |              |
| 3   | Q9HM69 CSG | 2 | 1527.7417 | -0.5 | 484   | 499 | 0  | 35.6  | 27 | T | LSDGDKGGDDILGLPG  | T | -0.4  | 3.42 |              |
| 3   | Q9HM69 CSG | 1 | 1565.6879 | -0.9 | 687   | 703 | 0  | 41.2  | 25 | I | EATEGGEAGGSLTVMGT | T | -0.1  | 3.02 |              |
| 3   | Q9HM69 CSG | 2 | 1588.6965 | -1.4 | 757   | 770 | 0  | 41.3  | 24 | A | DDGDNTDRQNVEIV    | E | -1.5  | 3.36 |              |
| 3   | Q9HM69 CSG | 2 | 1603.857  | -2.0 | 667   | 680 | 0  | 35.3  | 26 | T | ASDDLIVTQQFRLV    | D | 0.4   | 3.88 |              |
| 3   | Q9HM69 CSG | 2 | 1628.7894 | 0.1  | 483   | 499 | 0  | 29.9  | 27 | I | TLSDGDKGGDDILGLPG | T | -0.4  | 3.42 |              |
| 3   | Q9HM69 CSG | 2 | 1642.637  | 0.1  | 470   | 483 | 0  | 16.1  | 16 | I | EVSDDTFEEEDIT     | L | -1.3  | 2.64 |              |
| 3   | Q9HM69 CSG | 2 | 1710.7486 | -0.9 | 220   | 234 | 0  | 75.4  | 24 | L | RFDIDPNNVDAGDYT   | V | -1.1  | 3.42 |              |
| 3   | Q9HM69 CSG | 2 | 1750.8261 | 1.8  | 349   | 365 | 0  | 40.2  | 28 | A | YAIVEIDGNGVGSJET  | Q | 0.1   | 2.84 |              |
| 3   | Q9HM69 CSG | 2 | 1751.7962 | -1.6 | 516   | 532 | 0  | 42.1  | 26 | S | GGVKDNIDTSDFNQGVS | S | -0.7  | 3.6  |              |
| 3   | Q9HM69 CSG | 2 | 1751.7962 | 0.0  | 515   | 531 | 0  | 50.2  | 26 | S | SGGVKDNIDTSDFNQGV | S | -0.7  | 3.6  |              |
| 3   | Q9HM69 CSG | 2 | 1814.7595 | 0.3  | 547   | 562 | 0  | 71.4  | 21 | A | SFETYNGQVADDDNQI  | D | -1.1  | 2.78 |              |
| 3   | Q9HM69 CSG | 3 | 1816.8915 | -0.9 | 651   | 666 | 0  | 35.9  | 28 | T | GDQIRDRILSNTVDDT  | A | -1.0  | 3.88 |              |

| hit | accession     | z | mass      | ppm  | start | end | mc | score | id | - | sequence                        | + | gravy | pl   | modification  |
|-----|---------------|---|-----------|------|-------|-----|----|-------|----|---|---------------------------------|---|-------|------|---------------|
| 3   | Q9HM69 CSG    | 2 | 1838.8283 | -1.3 | 515   | 532 | 0  | 68.1  | 26 | S | SGGVKDNIDTSDFNQGV               | S | -0.8  | 3.6  |               |
| 3   | Q9HM69 CSG    | 2 | 1865.7664 | -1.6 | 201   | 219 | 0  | 63.2  | 20 | A | DQSGGAYEDGTGNNGPNTL             | R | -1.4  | 2.88 |               |
| 3   | Q9HM69 CSG    | 2 | 1885.7966 | -0.6 | 546   | 562 | 0  | 70.4  | 22 | T | ASFETYNGQVADDDNQI               | D | -0.9  | 2.78 |               |
| 3   | Q9HM69 CSG    | 2 | 1887.8446 | 2.4  | 754   | 770 | 0  | 29.8  | 25 | T | VEADDGDNTDRQNVEIV               | E | -1.1  | 3.32 |               |
| 3   | Q9HM69 CSG    | 2 | 1925.8603 | -1.8 | 515   | 533 | 0  | 70.8  | 25 | S | SGGVKDNIDTSDFNQGVSS             | T | -0.8  | 3.6  |               |
| 3   | Q9HM69 CSG    | 2 | 1936.8035 | 0.2  | 200   | 219 | 0  | 87.4  | 21 | A | ADQSGGAYEDGTGNNGPNTL            | R | -1.2  | 2.88 |               |
| 3   | Q9HM69 CSG    | 2 | 1936.8796 | -0.2 | 687   | 706 | 0  | 100.2 | 27 | I | EATEGGEAGGSLTVMGTTNR            | K | -0.5  | 3.96 |               |
| 3   | Q9HM69 CSG    | 2 | 1939.876  | -1.2 | 516   | 534 | 0  | 59.5  | 26 | S | GGVKDNIDTSDFNQGVSS              | S | -0.7  | 3.6  |               |
| 3   | Q9HM69 CSG    | 2 | 1947.9326 | -0.5 | 276   | 292 | 0  | 73.1  | 28 | A | NLKYTIENSPEGNYHAV               | T | -1.0  | 5.3  |               |
| 3   | Q9HM69 CSG    | 2 | 1959.8658 | 1.4  | 757   | 773 | 0  | 52.2  | 24 | A | DDGDNTDRQNVEIVEEL               | E | -1.4  | 3.28 |               |
| 3   | Q9HM69 CSG    | 2 | 1971.8658 | -1.9 | 557   | 575 | 0  | 57.2  | 24 | A | DDDNQIDVEGTAPGKDNVA             | A | -1.2  | 3.26 |               |
| 3   | Q9HM69 CSG    | 2 | 1988.8923 | -1.3 | 753   | 770 | 0  | 47.7  | 25 | Y | TVEADDGDNTDRQNVEIV              | E | -1.1  | 3.32 |               |
| 3   | Q9HM69 CSG    | 2 | 2026.908  | -0.6 | 515   | 534 | 0  | 93.9  | 26 | S | SGGVKDNIDTSDFNQGVSS             | S | -0.8  | 3.6  |               |
| 3   | Q9HM69 CSG    | 2 | 2036.0208 | -1.9 | 697   | 715 | 0  | 34.0  | 28 | G | SLTVMGTTNRKADDNTITV             | E | -0.4  | 6.9  |               |
| 3   | Q9HM69 CSG    | 2 | 2042.8328 | -0.9 | 591   | 608 | 0  | 82.0  | 18 | I | SVDSDDTFDEEDIDISEL              | R | -0.8  | 2.58 |               |
| 3   | Q9HM69 CSG    | 2 | 2042.9029 | -1.2 | 557   | 576 | 0  | 48.0  | 25 | A | DDDNQIDVEGTAPGKDNVAA            | I | -1.0  | 3.26 |               |
| 3   | Q9HM69 CSG    | 2 | 2113.94   | -2.1 | 515   | 535 | 0  | 82.4  | 25 | S | SGGVKDNIDTSDFNQGVSS             | S | -0.8  | 3.6  |               |
| 3   | Q9HM69 CSG    | 2 | 2120.9247 | 0.1  | 198   | 219 | 0  | 73.7  | 24 | I | LAADQSGGAYEDGTGNNGPNTL          | R | -0.8  | 2.88 |               |
| 3   | Q9HM69 CSG    | 2 | 2204.1689 | 0.1  | 667   | 686 | 0  | 59.9  | 26 | T | ASDDLIVTQQFRLVDGLTTI            | E | 0.4   | 3.6  |               |
| 3   | Q9HM69 CSG    | 3 | 2246.0775 | -1.6 | 646   | 666 | 0  | 37.5  | 28 | T | SGSPTGDQIRDRILSNTVDDT           | A | -0.9  | 3.88 |               |
| 3   | Q9HM69 CSG    | 2 | 2315.9666 | -0.2 | 547   | 567 | 0  | 97.1  | 20 | A | SFETYNGQVADDDNQIDVEGT           | A | -1.0  | 2.7  |               |
| 3   | Q9HM69 CSG    | 2 | 2384.0139 | 0.8  | 591   | 611 | 0  | 150.0 | 22 | I | SVDSDDTFDEEDIDISELRQG           | S | -1.1  | 3.12 |               |
| 3   | Q9HM69 CSG    | 2 | 2441.0943 | -1.3 | 552   | 575 | 0  | 71.0  | 25 | Y | NGQVADDDNQIDVEGTAPGKDNVA        | A | -1.0  | 3.26 |               |
| 3   | Q9HM69 CSG    | 2 | 2471.046  | -0.5 | 591   | 612 | 0  | 91.3  | 20 | I | SVDSDDTFDEEDIDISELRQGS          | A | -1.1  | 3.12 |               |
| 3   | Q9HM69 CSG    | 2 | 2512.1314 | -0.4 | 552   | 576 | 0  | 55.0  | 26 | Y | NGQVADDDNQIDVEGTAPGKDNVAA       | I | -0.9  | 3.26 |               |
| 3   | Q9HM69 CSG    | 2 | 2542.0831 | 2.4  | 591   | 613 | 0  | 115.8 | 22 | I | SVDSDDTFDEEDIDISELRQGS          | S | -1.0  | 3.12 |               |
| 3   | Q9HM69 CSG    | 3 | 2631.2988 | -0.5 | 651   | 674 | 0  | 61.7  | 29 | T | GDQIRDRILSNTVDDTASDDLIVT        | Q | -0.4  | 3.58 |               |
| 3   | Q9HM69 CSG    | 3 | 2894.3564 | -0.7 | 687   | 715 | 0  | 60.7  | 28 | I | EATEGGEAGGSLTVMGTTNRKADDNTITV   | E | -0.5  | 3.92 |               |
| 3   | Q9HM69 CSG    | 3 | 2910.3513 | -0.6 | 687   | 715 | 0  | 66.1  | 28 | I | EATEGGEAGGSLTVMGTTNRKADDNTITV   | E | -0.5  | 3.92 | Oxidation (M) |
| 3   | Q9HM69 CSG    | 3 | 2997.3112 | -0.5 | 547   | 574 | 0  | 56.4  | 24 | A | SFETYNGQVADDDNQIDVEGTAPGKDNV    | A | -1.0  | 3.22 |               |
| 3   | Q9HM69 CSG    | 3 | 3060.4848 | 0.2  | 646   | 674 | 0  | 51.5  | 29 | T | SGSPTGDQIRDRILSNTVDDTASDDLIVT   | Q | -0.5  | 3.58 |               |
| 3   | Q9HM69 CSG    | 3 | 3068.3483 | 0.2  | 546   | 574 | 0  | 59.3  | 24 | T | ASFETYNGQVADDDNQIDVEGTAPGKDNV   | A | -0.9  | 3.22 |               |
| 3   | Q9HM69 CSG    | 3 | 3068.3483 | -0.6 | 547   | 575 | 0  | 45.2  | 23 | A | SFETYNGQVADDDNQIDVEGTAPGKDNVA   | A | -0.9  | 3.22 |               |
| 3   | Q9HM69 CSG    | 3 | 3139.3854 | -0.2 | 546   | 575 | 0  | 54.5  | 24 | T | ASFETYNGQVADDDNQIDVEGTAPGKDNVA  | A | -0.8  | 3.22 |               |
| 3   | Q9HM69 CSG    | 3 | 3210.4225 | -0.4 | 546   | 576 | 0  | 59.7  | 24 | T | ASFETYNGQVADDDNQIDVEGTAPGKDNVAA | I | -0.8  | 3.22 |               |
| 4   | Q9HMI3 Q9HMI3 | 1 | 923.4025  | -0.5 | 160   | 167 | 0  | 38.0  | 26 | T | FGDWVDSV                        | E | 0.3   | 2.92 |               |
| 4   | Q9HMI3 Q9HMI3 | 1 | 1024.4502 | -0.7 | 159   | 167 | 0  | 32.6  | 26 | I | TFGDWVDSV                       | E | 0.2   | 2.92 |               |
| 4   | Q9HMI3 Q9HMI3 | 2 | 1045.5557 | 0.7  | 554   | 563 | 0  | 40.2  | 27 | T | SVGGPFLDRV                      | E | 0.4   | 6.78 |               |
| 4   | Q9HMI3 Q9HMI3 | 1 | 1140.5299 | 0.4  | 209   | 219 | 0  | 39.8  | 25 | A | DAQPELGTDPV                     | G | -0.8  | 2.88 |               |
| 4   | Q9HMI3 Q9HMI3 | 1 | 1162.5143 | 0.1  | 99    | 109 | 0  | 30.7  | 26 | S | GLADDWTLDTG                     | T | -0.4  | 2.82 |               |

| hit | accession     | z | mass      | ppm  | start | end | mc | score | id | - | sequence                   | + | gravy | pl   | modification |
|-----|---------------|---|-----------|------|-------|-----|----|-------|----|---|----------------------------|---|-------|------|--------------|
| 4   | Q9HMI3 Q9HMI3 | 2 | 1172.6037 | 0.3  | 330   | 339 | 0  | 33.5  | 28 | A | INRDEIVDSI                 | Y | -0.2  | 3.7  |              |
| 4   | Q9HMI3 Q9HMI3 | 2 | 1172.619  | -0.9 | 556   | 566 | 0  | 36.4  | 28 | V | GGPFLDRVELA                | - | 0.2   | 4.08 |              |
| 4   | Q9HMI3 Q9HMI3 | 2 | 1172.6401 | -0.8 | 197   | 206 | 0  | 31.2  | 27 | A | ILSRDQIESL                 | G | 0.0   | 4.08 |              |
| 4   | Q9HMI3 Q9HMI3 | 2 | 1187.6146 | -1.9 | 198   | 208 | 0  | 45.5  | 27 | I | LSRDQIESLGA                | D | -0.3  | 4.08 |              |
| 4   | Q9HMI3 Q9HMI3 | 2 | 1193.5928 | -0.8 | 460   | 470 | 0  | 43.3  | 27 | V | LLHPGTDIDDV                | P | 0.0   | 3.6  |              |
| 4   | Q9HMI3 Q9HMI3 | 2 | 1224.5663 | 0.5  | 157   | 167 | 0  | 41.0  | 26 | A | SITFGDWVDSV                | E | 0.5   | 2.92 |              |
| 4   | Q9HMI3 Q9HMI3 | 2 | 1236.5874 | -1.5 | 378   | 389 | 0  | 49.2  | 27 | A | DAGVTDLSFELA               | T | 0.5   | 2.88 |              |
| 4   | Q9HMI3 Q9HMI3 | 2 | 1243.6772 | 0.2  | 196   | 206 | 0  | 43.3  | 26 | A | AILSRDQIESL                | G | 0.2   | 4.08 |              |
| 4   | Q9HMI3 Q9HMI3 | 2 | 1268.5885 | -1.2 | 207   | 219 | 0  | 45.5  | 26 | L | GADAQPELGTDPV              | G | -0.5  | 2.88 |              |
| 4   | Q9HMI3 Q9HMI3 | 2 | 1314.7143 | 0.3  | 195   | 206 | 0  | 62.3  | 26 | A | AAILSRDQIESL               | G | 0.3   | 4.08 |              |
| 4   | Q9HMI3 Q9HMI3 | 2 | 1350.6932 | 1.9  | 178   | 188 | 0  | 33.3  | 27 | I | DLTQQYAPFLR                | N | -0.6  | 6.7  |              |
| 4   | Q9HMI3 Q9HMI3 | 2 | 1358.7194 | -0.9 | 554   | 566 | 0  | 63.1  | 27 | T | SVGGPFLDRVELA              | - | 0.5   | 4.08 |              |
| 4   | Q9HMI3 Q9HMI3 | 2 | 1370.5779 | -0.1 | 240   | 252 | 0  | 44.5  | 23 | T | AFDDYWGGAPSVS              | A | -0.2  | 2.92 |              |
| 4   | Q9HMI3 Q9HMI3 | 2 | 1442.7729 | 0.6  | 195   | 208 | 0  | 32.6  | 26 | A | AAILSRDQIESLGA             | D | 0.4   | 4.08 |              |
| 4   | Q9HMI3 Q9HMI3 | 2 | 1475.7157 | -1.0 | 390   | 402 | 0  | 48.6  | 28 | A | TFSNPRGYNPNPI              | Q | -1.2  | 9.84 |              |
| 4   | Q9HMI3 Q9HMI3 | 2 | 1582.7223 | -0.4 | 271   | 285 | 0  | 72.9  | 26 | I | NGDAHITDNLDAQSI            | Q | -0.6  | 3.6  |              |
| 4   | Q9HMI3 Q9HMI3 | 2 | 1632.7744 | 1.0  | 114   | 128 | 0  | 30.6  | 27 | L | TLREDATFHSGADLT            | A | -0.5  | 4.3  |              |
| 4   | Q9HMI3 Q9HMI3 | 2 | 1696.8056 | -0.4 | 331   | 345 | 0  | 67.5  | 27 | I | NRDEIVDSIYQGFAA            | S | -0.3  | 3.7  |              |
| 4   | Q9HMI3 Q9HMI3 | 2 | 1718.8112 | -1.9 | 460   | 475 | 0  | 36.7  | 28 | V | LLHPGTDIDDVDPADQN          | Y | -0.7  | 3.42 |              |
| 4   | Q9HMI3 Q9HMI3 | 2 | 1740.8108 | -0.1 | 237   | 252 | 0  | 58.2  | 27 | V | RLTAFDDYWGGAPSVS           | A | -0.3  | 3.88 |              |
| 4   | Q9HMI3 Q9HMI3 | 2 | 1761.7556 | 1.1  | 489   | 503 | 0  | 77.8  | 23 | V | SAWVDTDYMEFVDKGG           | Q | -0.5  | 3.5  |              |
| 4   | Q9HMI3 Q9HMI3 | 2 | 1775.8591 | -1.9 | 390   | 405 | 0  | 61.3  | 28 | A | TFSNPRGYNPNPIQTA           | T | -1.1  | 9.84 |              |
| 4   | Q9HMI3 Q9HMI3 | 2 | 1793.8221 | 2.3  | 222   | 236 | 0  | 99.2  | 27 | T | GPFFEDQLDNETQRV            | R | -1.2  | 3.58 |              |
| 4   | Q9HMI3 Q9HMI3 | 2 | 1806.7196 | 0.3  | 445   | 459 | 0  | 26.0  | 18 | S | GWYTDNADPDNFMVY            | L | -0.9  | 2.82 |              |
| 4   | Q9HMI3 Q9HMI3 | 2 | 1808.9309 | -0.7 | 78    | 93  | 0  | 57.2  | 27 | V | TNQIFDTLIQFKPGTS           | G | -0.3  | 6.76 |              |
| 4   | Q9HMI3 Q9HMI3 | 2 | 1809.8897 | -0.3 | 330   | 345 | 0  | 64.1  | 28 | A | INRDEIVDSIYQGFAA           | S | 0.0   | 3.7  |              |
| 4   | Q9HMI3 Q9HMI3 | 2 | 1856.7741 | 0.1  | 139   | 153 | 0  | 83.7  | 20 | R | FIDDEYDYLLGSDRS            | G | -1.1  | 3.36 |              |
| 4   | Q9HMI3 Q9HMI3 | 2 | 1951.8912 | -0.7 | 220   | 236 | 0  | 121.6 | 26 | V | GTGPFEDQLDNETQRV           | R | -1.1  | 3.58 |              |
| 4   | Q9HMI3 Q9HMI3 | 3 | 1955.8762 | -0.8 | 507   | 522 | 0  | 46.7  | 26 | T | YDDAARQQYYHQASQI           | A | -1.5  | 5.1  |              |
| 4   | Q9HMI3 Q9HMI3 | 2 | 1994.9585 | 0.4  | 460   | 477 | 0  | 44.3  | 28 | V | LLHPGTDIDDVDPADQNYI        | A | -0.4  | 3.42 |              |
| 4   | Q9HMI3 Q9HMI3 | 2 | 2051.084  | 0.3  | 178   | 195 | 0  | 34.6  | 27 | I | DLTQQYAPFLRNLAIFAA         | A | 0.4   | 6.7  |              |
| 4   | Q9HMI3 Q9HMI3 | 2 | 2065.0076 | 0.3  | 266   | 285 | 0  | 54.7  | 28 | R | AQGLINGDAHITDNLDAQSI       | Q | -0.2  | 3.6  |              |
| 4   | Q9HMI3 Q9HMI3 | 3 | 2146.963  | 1.9  | 489   | 506 | 0  | 53.0  | 26 | V | SAWVDTDYMEFVDKGGRT         | Y | -0.9  | 3.96 |              |
| 4   | Q9HMI3 Q9HMI3 | 2 | 2147.896  | -0.4 | 139   | 156 | 0  | 71.5  | 20 | R | FIDDEYDYLLGSDRSGYA         | S | -0.9  | 3.36 |              |
| 4   | Q9HMI3 Q9HMI3 | 2 | 2209.1267 | -1.2 | 78    | 97  | 0  | 80.9  | 28 | V | TNQIFDTLIQFKPGTSGELT       | S | -0.3  | 4.08 |              |
| 4   | Q9HMI3 Q9HMI3 | 2 | 2296.1587 | -0.3 | 78    | 98  | 0  | 86.3  | 28 | V | TNQIFDTLIQFKPGTSGELTS      | G | -0.3  | 4.08 |              |
| 4   | Q9HMI3 Q9HMI3 | 2 | 2310.1339 | 0.2  | 198   | 219 | 0  | 79.5  | 28 | I | LSRDQIESLGADAQPELGTDPV     | G | -0.5  | 3.42 |              |
| 4   | Q9HMI3 Q9HMI3 | 2 | 2494.2551 | -1.9 | 196   | 219 | 0  | 67.1  | 29 | A | AILSRDQIESLGADAQPELGTDPV   | G | -0.2  | 3.42 |              |
| 4   | Q9HMI3 Q9HMI3 | 2 | 2565.2922 | 0.0  | 195   | 219 | 0  | 94.1  | 29 | A | AAILSRDQIESLGADAQPELGTDPV  | G | -0.1  | 3.42 |              |
| 4   | Q9HMI3 Q9HMI3 | 3 | 2939.3322 | 0.2  | 346   | 372 | 0  | 59.9  | 26 | A | SANQPLPPDVLGHNDIDSYPHDPQQA | E | -1.2  | 3.7  |              |

| hit | accession       | z | mass      | ppm  | start | end | mc | score | id | - | sequence                   | + | gravy | pl   | modification  |
|-----|-----------------|---|-----------|------|-------|-----|----|-------|----|---|----------------------------|---|-------|------|---------------|
| 5   | Q9HQA6 Q9HQA6   | 1 | 795.3651  | -1.8 | 287   | 293 | 0  | 53.8  | 26 | A | YDLIDGT                    | R | -0.2  | 2.92 |               |
| 5   | Q9HQA6 Q9HQA6   | 2 | 956.4451  | 1.0  | 80    | 89  | 0  | 65.6  | 26 | V | DLGPSAPSDV                 | S | -0.2  | 2.92 |               |
| 5   | Q9HQA6 Q9HQA6   | 1 | 1027.4862 | -1.1 | 52    | 60  | 0  | 30.0  | 26 | A | EYVAYVDVA                  | G | 0.7   | 3    |               |
| 5   | Q9HQA6 Q9HQA6   | 1 | 1041.3961 | -1.5 | 91    | 99  | 0  | 25.1  | 19 | S | SMLDDFEDA                  | T | -0.5  | 2.78 |               |
| 5   | Q9HQA6 Q9HQA6   | 1 | 1055.4117 | 1.1  | 92    | 100 | 0  | 46.4  | 20 | S | MLDDFEDAT                  | D | -0.5  | 2.78 |               |
| 5   | Q9HQA6 Q9HQA6   | 1 | 1098.4982 | -2.1 | 212   | 222 | 0  | 24.5  | 24 | S | AFEGVNGGSYV                | Q | 0.2   | 3.3  |               |
| 5   | Q9HQA6 Q9HQA6   | 1 | 1124.4622 | -0.1 | 164   | 174 | 0  | 37.5  | 23 | Y | SDDSLGGFDNV                | L | -0.5  | 2.82 |               |
| 5   | Q9HQA6 Q9HQA6   | 1 | 1142.4438 | -2.8 | 91    | 100 | 0  | 32.4  | 20 | S | SMLDDFEDAT                 | D | -0.5  | 2.78 |               |
| 5   | Q9HQA6 Q9HQA6   | 2 | 1151.5822 | 0.4  | 287   | 296 | 0  | 66.4  | 26 | A | YDLIDGTRSL                 | Y | -0.3  | 3.88 |               |
| 5   | Q9HQA6 Q9HQA6   | 2 | 1184.5561 | 0.5  | 78    | 89  | 0  | 40.8  | 25 | A | EVDLGPSAPSDV               | S | -0.1  | 2.88 |               |
| 5   | Q9HQA6 Q9HQA6   | 1 | 1198.5176 | -0.1 | 134   | 144 | 0  | 27.8  | 24 | T | TYDESGMVNAI                | E | -0.1  | 3    |               |
| 5   | Q9HQA6 Q9HQA6   | 2 | 1287.5255 | 0.1  | 163   | 174 | 0  | 76.5  | 21 | V | YSDDSLGGFDNV               | L | -0.6  | 2.82 |               |
| 5   | Q9HQA6 Q9HQA6   | 2 | 1308.5834 | 0.8  | 164   | 176 | 0  | 74.9  | 25 | Y | SDDSLGGFDNVLA              | A | 0.0   | 2.82 |               |
| 5   | Q9HQA6 Q9HQA6   | 2 | 1314.6456 | 0.5  | 287   | 297 | 0  | 41.4  | 28 | A | YDLIDGTRSLY                | A | -0.4  | 3.88 |               |
| 5   | Q9HQA6 Q9HQA6   | 2 | 1368.6773 | 0.4  | 76    | 89  | 0  | 45.6  | 26 | T | LAEVDLGPSAPSDV             | S | 0.3   | 2.88 |               |
| 5   | Q9HQA6 Q9HQA6   | 2 | 1385.6827 | 0.4  | 287   | 298 | 0  | 32.7  | 28 | A | YDLIDGTRSLYA               | S | -0.2  | 3.88 |               |
| 5   | Q9HQA6 Q9HQA6   | 2 | 1386.5973 | 0.2  | 132   | 144 | 0  | 30.9  | 23 | L | STTYDESGMVNAI              | E | -0.2  | 3    |               |
| 5   | Q9HQA6 Q9HQA6   | 2 | 1414.5922 | -0.5 | 134   | 146 | 0  | 29.1  | 22 | T | TYDESGMVNAIES              | S | -0.4  | 2.94 |               |
| 5   | Q9HQA6 Q9HQA6   | 2 | 1460.6572 | 0.1  | 212   | 225 | 0  | 44.0  | 27 | S | AFEGVNGGSYVQYA             | L | 0.0   | 3.3  |               |
| 5   | Q9HQA6 Q9HQA6   | 2 | 1463.6893 | 0.4  | 178   | 191 | 0  | 96.0  | 28 | A | LGDGEFVVGDRDSV             | E | -0.1  | 3.5  |               |
| 5   | Q9HQA6 Q9HQA6   | 2 | 1503.7205 | 0.3  | 299   | 312 | 0  | 38.7  | 28 | A | SVSPEELRPSFEAG             | S | -0.6  | 3.96 |               |
| 5   | Q9HQA6 Q9HQA6   | 2 | 1519.6791 | -0.3 | 93    | 105 | 0  | 98.3  | 25 | M | LDDFEDATDINPR              | K | -1.1  | 3.36 |               |
| 5   | Q9HQA6 Q9HQA6   | 2 | 1566.6798 | -1.5 | 179   | 193 | 0  | 61.0  | 24 | L | GDGEFVVGDRDSVES            | M | -0.6  | 3.42 |               |
| 5   | Q9HQA6 Q9HQA6   | 2 | 1676.8369 | -0.4 | 226   | 241 | 0  | 103.1 | 28 | A | LSAPNGSDSLGYERV            | A | -0.2  | 4.08 |               |
| 5   | Q9HQA6 Q9HQA6   | 2 | 1679.7639 | -1.4 | 178   | 193 | 0  | 72.9  | 27 | A | LGDGEFVVGDRDSVES           | M | -0.4  | 3.42 |               |
| 5   | Q9HQA6 Q9HQA6   | 2 | 1737.7516 | 0.5  | 91    | 105 | 0  | 93.0  | 24 | S | SMLDDFEDATDINPR            | K | -0.9  | 3.36 |               |
| 5   | Q9HQA6 Q9HQA6   | 2 | 1750.801  | -1.0 | 177   | 193 | 0  | 78.0  | 27 | A | ALGDGEFVVGDRDSVES          | M | -0.2  | 3.42 |               |
| 5   | Q9HQA6 Q9HQA6   | 2 | 1760.8581 | 1.0  | 93    | 107 | 0  | 74.0  | 28 | M | LDDFEDATDINPRKI            | Q | -1.0  | 3.76 |               |
| 5   | Q9HQA6 Q9HQA6   | 2 | 1824.7836 | 1.3  | 90    | 105 | 0  | 90.6  | 23 | V | SSMLDDFEDATDINPR           | K | -0.9  | 3.36 |               |
| 5   | Q9HQA6 Q9HQA6   | 2 | 1840.7785 | -0.8 | 90    | 105 | 0  | 90.9  | 22 | V | SSMLDDFEDATDINPR           | K | -0.9  | 3.36 | Oxidation (M) |
| 5   | Q9HQA6 Q9HQA6   | 2 | 1978.9306 | 0.8  | 91    | 107 | 0  | 77.7  | 28 | S | SMLDDFEDATDINPRKI          | Q | -0.8  | 3.76 |               |
| 5   | Q9HQA6 Q9HQA6   | 3 | 1984.9272 | -1.2 | 194   | 211 | 0  | 29.2  | 27 | S | MLDVRSGDADHLEGDLRS         | A | -0.7  | 4.12 |               |
| 5   | Q9HQA6 Q9HQA6   | 2 | 2038.879  | -0.9 | 88    | 105 | 0  | 83.2  | 23 | S | DVSSMLDDFEDATDINPR         | K | -0.8  | 3.26 |               |
| 5   | Q9HQA6 Q9HQA6   | 2 | 2065.9626 | -0.9 | 90    | 107 | 0  | 114.2 | 27 | V | SSMLDDFEDATDINPRKI         | Q | -0.8  | 3.76 |               |
| 5   | Q9HQA6 Q9HQA6   | 3 | 2081.9575 | -0.1 | 90    | 107 | 0  | 57.9  | 27 | V | SSMLDDFEDATDINPRKI         | Q | -0.8  | 3.76 | Oxidation (M) |
| 5   | Q9HQA6 Q9HQA6   | 3 | 2659.2977 | 0.2  | 299   | 323 | 0  | 36.7  | 29 | A | SVSPEELRPSFEAGSIEQDNTVIV   | T | -0.3  | 3.58 |               |
| 5   | Q9HQA6 Q9HQA6   | 3 | 2666.158  | -2.1 | 261   | 286 | 0  | 65.2  | 22 | V | SFGTDDGDITSTEHVIADESGSAERA | Y | -0.7  | 3.62 |               |
| 5   | Q9HQA6 Q9HQA6   | 2 | 2760.3454 | -1.7 | 299   | 324 | 0  | 31.9  | 29 | A | SVSPEELRPSFEAGSIEQDNTVIVT  | Y | -0.3  | 3.58 |               |
| 6   | Q9HMMW9 Q9HMMW9 | 1 | 666.3377  | -0.3 | 494   | 499 | 0  | 21.4  | 19 | T | GPFTFV                     | E | 1.2   | 6.02 |               |
| 6   | Q9HMMW9 Q9HMMW9 | 1 | 701.3959  | 0.0  | 353   | 358 | 0  | 34.9  | 29 | T | EITNLL                     | I | 0.7   | 3.3  |               |



| hit | accession       | z | mass      | ppm  | start | end | mc | score | id | - | sequence                      | + | gravy | pl    | modification  |
|-----|-----------------|---|-----------|------|-------|-----|----|-------|----|---|-------------------------------|---|-------|-------|---------------|
| 6   | Q9HMMW9 Q9HMMW9 | 1 | 1093.4386 | -1.0 | 258   | 266 | 0  | 25.6  | 23 | T | NMEEGIWES                     | A | -1.1  | 3.02  |               |
| 6   | Q9HMMW9 Q9HMMW9 | 2 | 1135.5584 | 0.2  | 336   | 345 | 0  | 50.0  | 26 | A | KVMDLFDAPT                    | N | 0.1   | 3.88  |               |
| 6   | Q9HMMW9 Q9HMMW9 | 1 | 1164.4757 | -2.1 | 258   | 267 | 0  | 24.7  | 23 | T | NMEEGIWESA                    | A | -0.8  | 3.02  |               |
| 6   | Q9HMMW9 Q9HMMW9 | 2 | 1179.5772 | -1.1 | 435   | 444 | 0  | 34.3  | 27 | V | EAVDDYTVRL                    | T | -0.3  | 3.7   |               |
| 6   | Q9HMMW9 Q9HMMW9 | 2 | 1212.6292 | -1.3 | 636   | 645 | 0  | 36.0  | 26 | A | FHLQPPQLFS                    | D | -0.1  | 7.84  |               |
| 6   | Q9HMMW9 Q9HMMW9 | 2 | 1235.6034 | -1.7 | 315   | 326 | 0  | 29.3  | 28 | S | GISSTFNSLDPV                  | A | 0.3   | 3.1   |               |
| 6   | Q9HMMW9 Q9HMMW9 | 3 | 1241.7092 | 2.3  | 304   | 316 | 0  | 30.0  | 24 | A | VAGIDGKGRLSGI                 | S | 0.3   | 10.08 |               |
| 6   | Q9HMMW9 Q9HMMW9 | 2 | 1253.6768 | 0.8  | 269   | 279 | 0  | 28.9  | 25 | A | LIPVYHNLQAS                   | F | 0.4   | 7.76  |               |
| 6   | Q9HMMW9 Q9HMMW9 | 2 | 1268.5673 | 0.2  | 120   | 130 | 0  | 43.4  | 25 | A | GYGPDNKYELN                   | W | -1.7  | 4.08  |               |
| 6   | Q9HMMW9 Q9HMMW9 | 2 | 1306.5102 | 0.4  | 512   | 523 | 0  | 36.0  | 18 | A | DAFEDYHDGAPA                  | I | -1.0  | 3.5   |               |
| 6   | Q9HMMW9 Q9HMMW9 | 2 | 1324.7139 | 0.7  | 268   | 279 | 0  | 36.7  | 26 | A | ALIPVYHNLQAS                  | F | 0.5   | 7.76  |               |
| 6   | Q9HMMW9 Q9HMMW9 | 2 | 1362.7071 | 1.5  | 446   | 457 | 0  | 66.0  | 27 | T | LESPFPYALDVL                  | T | 0.7   | 3     |               |
| 6   | Q9HMMW9 Q9HMMW9 | 2 | 1406.6136 | 1.2  | 154   | 165 | 0  | 37.2  | 25 | A | HIEMTINDANFS                  | S | -0.3  | 4.06  | Oxidation (M) |
| 6   | Q9HMMW9 Q9HMMW9 | 2 | 1436.7147 | 0.5  | 432   | 444 | 0  | 114.8 | 26 | A | TGVEAVDDYTVRL                 | T | 0.0   | 3.7   |               |
| 6   | Q9HMMW9 Q9HMMW9 | 2 | 1457.6998 | 0.9  | 238   | 251 | 0  | 49.0  | 27 | R | LVSNPQSEDAIQT                 | R | -0.5  | 3     |               |
| 6   | Q9HMMW9 Q9HMMW9 | 2 | 1463.7548 | 0.1  | 445   | 457 | 0  | 36.7  | 27 | L | TLESPFPYALDVL                 | T | 0.6   | 3     |               |
| 6   | Q9HMMW9 Q9HMMW9 | 2 | 1568.7318 | 0.2  | 414   | 428 | 0  | 38.9  | 27 | I | STLGIEHEVDENGAV               | K | -0.3  | 3.68  |               |
| 6   | Q9HMMW9 Q9HMMW9 | 2 | 1601.7474 | -0.4 | 538   | 550 | 0  | 77.7  | 27 | A | RYNYFLNENADLA                 | G | -0.8  | 4.08  |               |
| 6   | Q9HMMW9 Q9HMMW9 | 2 | 1619.7144 | 0.2  | 92    | 104 | 0  | 61.1  | 25 | T | DYQPDFDKYPYGI                 | D | -1.4  | 3.6   |               |
| 6   | Q9HMMW9 Q9HMMW9 | 3 | 1696.8268 | 0.2  | 414   | 429 | 0  | 43.6  | 27 | I | STLGIEHEVDENGAVK              | R | -0.5  | 4.16  |               |
| 6   | Q9HMMW9 Q9HMMW9 | 2 | 1714.6747 | -1.5 | 508   | 523 | 0  | 62.0  | 16 | G | SYSADAFEDYHDGAPA              | I | -0.8  | 3.5   |               |
| 6   | Q9HMMW9 Q9HMMW9 | 2 | 1728.7301 | 0.2  | 116   | 130 | 0  | 73.4  | 22 | V | MEEAGYGPDNKYELN               | W | -1.5  | 3.68  |               |
| 6   | Q9HMMW9 Q9HMMW9 | 2 | 1735.7835 | -1.6 | 252   | 266 | 0  | 52.6  | 26 | T | RKDAATNMEEGIWES               | A | -1.2  | 4.16  |               |
| 6   | Q9HMMW9 Q9HMMW9 | 2 | 1744.725  | -2.8 | 116   | 130 | 0  | 37.6  | 20 | V | MEEAGYGPDNKYELN               | W | -1.5  | 3.68  | Oxidation (M) |
| 6   | Q9HMMW9 Q9HMMW9 | 2 | 1802.905  | 1.3  | 166   | 181 | 0  | 48.3  | 29 | S | SLLETTKQGEHEAFTL              | G | -0.5  | 4.54  |               |
| 6   | Q9HMMW9 Q9HMMW9 | 2 | 1945.8305 | 1.3  | 280   | 295 | 0  | 60.1  | 23 | S | FWYDRLDYNPPGAMDS              | S | -1.0  | 3.6   |               |
| 6   | Q9HMMW9 Q9HMMW9 | 2 | 1964.8316 | 0.0  | 92    | 107 | 0  | 49.5  | 22 | T | DYQPDFDKYPYGIDET              | K | -1.6  | 3.36  |               |
| 6   | Q9HMMW9 Q9HMMW9 | 2 | 1996.92   | -0.2 | 192   | 209 | 0  | 41.3  | 27 | R | NFMQLVQPDNTIYGGETA            | A | -0.4  | 3     |               |
| 6   | Q9HMMW9 Q9HMMW9 | 2 | 2017.9004 | -1.9 | 356   | 372 | 0  | 90.9  | 25 | T | NLLITDYETNDDLSEYT             | L | -0.8  | 2.76  |               |
| 6   | Q9HMMW9 Q9HMMW9 | 2 | 2094.9283 | -0.2 | 487   | 507 | 0  | 52.4  | 25 | S | ASNPVGTGPFVFEWDSGNGG          | S | -0.3  | 3     |               |
| 6   | Q9HMMW9 Q9HMMW9 | 2 | 2338.9754 | -0.8 | 88    | 107 | 0  | 52.1  | 18 | T | GESTDYQPDFDKYPYGIDET          | K | -1.6  | 3.32  |               |
| 6   | Q9HMMW9 Q9HMMW9 | 3 | 2637.1759 | -0.1 | 88    | 110 | 0  | 59.6  | 25 | T | GESTDYQPDFDKYPYGIDETKVA       | E | -1.3  | 3.68  |               |
| 6   | Q9HMMW9 Q9HMMW9 | 3 | 2704.1942 | -0.4 | 636   | 658 | 0  | 62.2  | 24 | A | FHLQPPQLFSDGQEGYNNHYQGE       | - | -1.4  | 4.4   |               |
| 6   | Q9HMMW9 Q9HMMW9 | 3 | 2837.2556 | 0.6  | 88    | 112 | 0  | 54.5  | 25 | T | GESTDYQPDFDKYPYGIDETKVAEA     | R | -1.2  | 3.62  |               |
| 6   | Q9HMMW9 Q9HMMW9 | 3 | 3223.4357 | -0.5 | 82    | 110 | 0  | 42.7  | 25 | T | DAPTTTGESTDYQPDFDKYPYGIDETKVA | E | -1.2  | 3.58  |               |
| 6   | Q9HMMW9 Q9HMMW9 | 3 | 3245.5128 | -1.0 | 120   | 146 | 0  | 58.5  | 28 | A | GYGPDNKYELNWLQYSPTWKEMANTI    | R | -1.2  | 4.44  |               |
| 7   | Q9HRU5 Q9HRU5   | 2 | 859.4593  | -0.1 | 198   | 205 | 0  | 29.8  | 26 | A | FVVGWPV                       | G | 1.5   | 6.02  |               |
| 7   | Q9HRU5 Q9HRU5   | 1 | 870.481   | -0.3 | 162   | 169 | 0  | 44.9  | 26 | V | NALQILEA                      | A | 0.7   | 3.3   |               |
| 7   | Q9HRU5 Q9HRU5   | 1 | 941.5182  | -1.1 | 162   | 170 | 0  | 63.2  | 25 | V | NALQILEAA                     | G | 0.8   | 3.3   |               |
| 7   | Q9HRU5 Q9HRU5   | 1 | 963.4661  | 2.2  | 181   | 189 | 0  | 28.4  | 27 | A | SFAQAAEQI                     | R | 0.1   | 3.3   |               |

| hit | accession     | z | mass      | ppm  | start | end | mc | score | id | - | sequence                         | + | gravy | pl   | modification |
|-----|---------------|---|-----------|------|-------|-----|----|-------|----|---|----------------------------------|---|-------|------|--------------|
| 7   | Q9HRU5 Q9HRU5 | 1 | 987.5178  | -0.2 | 198   | 207 | 0  | 25.9  | 25 | A | FVVGWVPVGA                       | I | 1.4   | 6.02 |              |
| 7   | Q9HRU5 Q9HRU5 | 1 | 1050.4658 | 2.4  | 236   | 244 | 0  | 39.8  | 26 | S | WFADDTIPS                        | G | -0.2  | 2.92 |              |
| 7   | Q9HRU5 Q9HRU5 | 2 | 1162.6485 | -1.6 | 123   | 132 | 0  | 33.0  | 24 | A | TLYPETITLI                       | T | 0.8   | 3.3  |              |
| 7   | Q9HRU5 Q9HRU5 | 2 | 1208.535  | -0.5 | 234   | 244 | 0  | 31.2  | 26 | A | ASWFADDTIPS                      | G | -0.1  | 2.92 |              |
| 7   | Q9HRU5 Q9HRU5 | 2 | 1238.6143 | 1.0  | 247   | 257 | 0  | 55.5  | 26 | T | YSGIDRSIETV                      | S | -0.2  | 4.08 |              |
| 7   | Q9HRU5 Q9HRU5 | 2 | 1261.615  | 0.0  | 149   | 161 | 0  | 35.0  | 28 | A | TINTGDLGSGTQV                    | N | -0.2  | 3.1  |              |
| 7   | Q9HRU5 Q9HRU5 | 2 | 1263.6962 | 0.6  | 123   | 133 | 0  | 36.4  | 24 | A | TLYPETITLIT                      | R | 0.7   | 3.3  |              |
| 7   | Q9HRU5 Q9HRU5 | 2 | 1294.6921 | 0.3  | 92    | 102 | 0  | 42.8  | 25 | A | LIQNDIAYFAK                      | N | 0.3   | 6.68 |              |
| 7   | Q9HRU5 Q9HRU5 | 2 | 1326.5874 | 1.0  | 299   | 311 | 0  | 53.5  | 25 | A | SAQDGMSIDLHPG                    | A | -0.4  | 3.88 |              |
| 7   | Q9HRU5 Q9HRU5 | 2 | 1396.6834 | 0.1  | 245   | 257 | 0  | 56.8  | 27 | S | GTYSGIDRSIETV                    | S | -0.3  | 4.08 |              |
| 7   | Q9HRU5 Q9HRU5 | 2 | 1468.6616 | 0.4  | 299   | 313 | 0  | 78.2  | 26 | A | SAQDGMSIDLHPGAA                  | A | -0.1  | 3.88 |              |
| 7   | Q9HRU5 Q9HRU5 | 2 | 1471.7711 | 0.9  | 198   | 211 | 0  | 51.3  | 27 | A | FVVGWVPVGAIEEL                   | A | 1.1   | 3.12 |              |
| 7   | Q9HRU5 Q9HRU5 | 2 | 1539.6987 | 0.8  | 299   | 314 | 0  | 79.3  | 26 | A | SAQDGMSIDLHPGAAA                 | Y | 0.0   | 3.88 |              |
| 7   | Q9HRU5 Q9HRU5 | 2 | 1542.8082 | 0.1  | 198   | 212 | 0  | 72.7  | 27 | A | FVVGWVPVGAIEELA                  | N | 1.1   | 3.12 |              |
| 7   | Q9HRU5 Q9HRU5 | 2 | 1560.7532 | -1.5 | 108   | 122 | 0  | 46.8  | 28 | I | DAFQDRAVDNLAGVA                  | T | 0.0   | 3.6  |              |
| 7   | Q9HRU5 Q9HRU5 | 2 | 1688.8118 | -1.7 | 182   | 197 | 0  | 43.2  | 28 | S | FAQAAEQLRNGDIDAA                 | F | -0.4  | 3.7  |              |
| 7   | Q9HRU5 Q9HRU5 | 2 | 1736.9097 | 0.1  | 92    | 107 | 0  | 60.9  | 27 | A | LIQNDIAYFAKNGTGI                 | D | 0.2   | 6.68 |              |
| 7   | Q9HRU5 Q9HRU5 | 2 | 1775.8438 | -1.1 | 181   | 197 | 0  | 69.2  | 27 | A | SFAQAAEQLRNGDIDAA                | F | -0.4  | 3.7  |              |
| 7   | Q9HRU5 Q9HRU5 | 2 | 1854.8959 | -1.1 | 213   | 229 | 0  | 91.7  | 28 | A | NTNDIEIVPIEGEARDA                | A | -0.6  | 3.5  |              |
| 7   | Q9HRU5 Q9HRU5 | 2 | 1869.9261 | -0.7 | 85    | 101 | 0  | 58.9  | 28 | A | KGNADFALIQNDIAYFA                | K | 0.1   | 3.88 |              |
| 7   | Q9HRU5 Q9HRU5 | 2 | 1899.9538 | 0.1  | 151   | 169 | 0  | 70.2  | 28 | I | NTGDLGSGTQVNALQILEA              | A | 0.0   | 3    |              |
| 7   | Q9HRU5 Q9HRU5 | 2 | 1970.9909 | -1.2 | 151   | 170 | 0  | 38.0  | 29 | I | NTGDLGSGTQVNALQILEAA             | G | 0.1   | 3    |              |
| 7   | Q9HRU5 Q9HRU5 | 2 | 2032.0153 | -0.5 | 281   | 298 | 0  | 30.0  | 29 | A | IFEHTGDLTIKPDFIDTA               | S | 0.0   | 3.96 |              |
| 7   | Q9HRU5 Q9HRU5 | 3 | 2034.9745 | -0.9 | 162   | 180 | 0  | 64.4  | 28 | V | NALQILEAAGVTDYEEQTA              | S | -0.2  | 2.88 |              |
| 7   | Q9HRU5 Q9HRU5 | 2 | 2206.1733 | -0.7 | 123   | 142 | 0  | 97.3  | 26 | A | TLYPETITLITRADTGIETV             | A | 0.2   | 3.82 |              |
| 7   | Q9HRU5 Q9HRU5 | 3 | 2262.1015 | -0.3 | 160   | 180 | 0  | 54.0  | 28 | T | QVNALQILEAAGVTDYEEQTA            | S | -0.2  | 2.88 |              |
| 7   | Q9HRU5 Q9HRU5 | 2 | 2538.2449 | -2.1 | 206   | 229 | 0  | 77.8  | 29 | V | GAIEELANTNDIEIVPIEGEARDA         | A | -0.2  | 3.38 |              |
| 7   | Q9HRU5 Q9HRU5 | 2 | 2587.2078 | -1.0 | 234   | 257 | 0  | 49.7  | 27 | A | ASWFADDTIPSGTYSGIDRSIETV         | S | -0.2  | 3.5  |              |
| 7   | Q9HRU5 Q9HRU5 | 3 | 3379.6936 | -1.1 | 198   | 229 | 0  | 47.4  | 30 | A | FVVGWVPVGAIEELANTNDIEIVPIEGEARDA | A | 0.2   | 3.38 |              |
| 8   | Q9HH34 Q9HH34 | 1 | 727.448   | -0.1 | 108   | 114 | 0  | 27.4  | 25 | L | LDLALLA                          | K | 2.2   | 3.1  |              |
| 8   | Q9HH34 Q9HH34 | 2 | 1191.6573 | 0.8  | 214   | 224 | 0  | 32.9  | 23 | G | LGVETLAFMVL                      | D | 2.0   | 3.3  |              |
| 9   | Q9HR20 Q9HR20 | 1 | 664.3068  | 1.2  | 267   | 272 | 0  | 44.1  | 29 | S | DFADV                            | L | 1.0   | 2.92 |              |
| 9   | Q9HR20 Q9HR20 | 1 | 848.428   | 2.5  | 267   | 274 | 0  | 53.9  | 27 | S | DFADVLA                          | S | 1.5   | 2.92 |              |
| 9   | Q9HR20 Q9HR20 | 2 | 1012.4713 | 0.6  | 340   | 349 | 0  | 34.8  | 25 | I | AGDIDVPTEP                       | - | -0.4  | 2.88 |              |
| 9   | Q9HR20 Q9HR20 | 2 | 1074.5822 | -0.3 | 248   | 257 | 0  | 37.9  | 25 | A | QDIGRFAIGV                       | D | 0.6   | 6.78 |              |
| 9   | Q9HR20 Q9HR20 | 2 | 1145.6193 | 0.9  | 247   | 257 | 0  | 67.1  | 25 | A | AQDIGRFAIGV                      | D | 0.7   | 6.78 |              |
| 9   | Q9HR20 Q9HR20 | 2 | 1241.6616 | 0.0  | 303   | 314 | 0  | 37.2  | 26 | T | RLGLEDDGVVAV                     | Y | 0.5   | 3.7  |              |
| 9   | Q9HR20 Q9HR20 | 2 | 1289.5789 | -1.5 | 111   | 121 | 0  | 37.0  | 26 | T | NAADFPDQRWA                      | L | -1.2  | 3.88 |              |
| 9   | Q9HR20 Q9HR20 | 2 | 1316.6096 | -0.1 | 122   | 133 | 0  | 67.6  | 27 | A | LVDETVDDQDNVA                    | S | -0.3  | 2.78 |              |
| 9   | Q9HR20 Q9HR20 | 1 | 1474.7304 | -0.4 | 314   | 327 | 0  | 50.7  | 28 | A | VYGDQLGAEIPQSV                   | K | 0.0   | 3    |              |

| hit | accession     | z | mass      | ppm  | start | end | mc | score | id | - | sequence                      | + | gravy | pl   | modification |
|-----|---------------|---|-----------|------|-------|-----|----|-------|----|---|-------------------------------|---|-------|------|--------------|
| 9   | Q9HR20 Q9HR20 | 2 | 1526.6638 | -0.9 | 207   | 221 | 0  | 46.1  | 24 | S | YVGSFNDPSAGQSQA               | R | -0.6  | 3.1  |              |
| 9   | Q9HR20 Q9HR20 | 2 | 1624.8308 | -1.3 | 335   | 349 | 0  | 75.7  | 27 | S | RTELIAGDIDVPTPEP              | - | -0.3  | 3.58 |              |
| 9   | Q9HR20 Q9HR20 | 2 | 1700.7278 | -1.8 | 205   | 221 | 0  | 37.3  | 24 | L | SSYVGSFNDPSAGQSQA             | R | -0.7  | 3.1  |              |
| 9   | Q9HR20 Q9HR20 | 2 | 1842.8385 | -0.1 | 38    | 56  | 0  | 96.5  | 26 | V | GTVYGTGGLGDGSFNDQAK           | Q | -0.6  | 3.88 |              |
| 9   | Q9HR20 Q9HR20 | 3 | 1918.9133 | -0.4 | 44    | 62  | 0  | 44.3  | 28 | T | GGLGDGSFNDQAKQGLERA           | K | -1.0  | 4.3  |              |
| 9   | Q9HR20 Q9HR20 | 2 | 1919.9225 | -0.1 | 295   | 313 | 0  | 60.2  | 28 | G | NFAGGETTRLGLEDDGVVA           | V | -0.1  | 3.58 |              |
| 9   | Q9HR20 Q9HR20 | 2 | 1961.9443 | 0.8  | 151   | 170 | 0  | 77.1  | 29 | A | GLLTQREFSAGSGATNPDA           | T | -0.3  | 4.08 |              |
| 9   | Q9HR20 Q9HR20 | 3 | 2190.1168 | -0.3 | 314   | 334 | 0  | 55.0  | 28 | A | VYGDQLGAEIPQSVKDAVSKS         | R | -0.3  | 4.3  |              |
| 9   | Q9HR20 Q9HR20 | 3 | 2240.0458 | 0.2  | 41    | 62  | 0  | 70.1  | 28 | V | YGTGGLGDGSFNDQAKQGLERA        | K | -0.9  | 4.3  |              |
| 9   | Q9HR20 Q9HR20 | 3 | 2426.1463 | 0.0  | 38    | 61  | 0  | 61.8  | 28 | V | GTVYGTGGLGDGSFNDQAKQGLER      | A | -0.8  | 4.3  |              |
| 9   | Q9HR20 Q9HR20 | 3 | 2497.1834 | 0.0  | 38    | 62  | 0  | 100.1 | 28 | V | GTVYGTGGLGDGSFNDQAKQGLERA     | K | -0.7  | 4.3  |              |
| 9   | Q9HR20 Q9HR20 | 2 | 2588.1779 | -0.7 | 111   | 133 | 0  | 38.9  | 26 | T | NAADFPDQRWALVDETVDQDNVA       | S | -0.7  | 3.26 |              |
| 9   | Q9HR20 Q9HR20 | 3 | 2707.3453 | -0.3 | 144   | 170 | 0  | 56.8  | 29 | S | YLVGELAGLLTQREFSAGSGATNPDA    | T | 0.1   | 3.82 |              |
| 9   | Q9HR20 Q9HR20 | 3 | 3339.3964 | -2.0 | 69    | 97  | 0  | 20.0  | 18 | I | TYEESQPENNSEFATDQQQYAQDGSFDLV | N | -1.4  | 2.7  |              |
| 10  | Q9HNI7 Q9HNI7 | 2 | 1016.5655 | -0.8 | 36    | 44  | 0  | 26.7  | 25 | A | DVRFVLTPA                     | E | 0.7   | 6.78 |              |
| 10  | Q9HNI7 Q9HNI7 | 1 | 1064.451  | -1.8 | 135   | 144 | 0  | 24.1  | 24 | I | DSLSDLADET                    | V | -0.7  | 2.78 |              |
| 10  | Q9HNI7 Q9HNI7 | 2 | 1075.5736 | 0.4  | 155   | 164 | 0  | 32.0  | 26 | S | GSLFPLQMLA                    | D | 1.2   | 6.02 |              |
| 10  | Q9HNI7 Q9HNI7 | 2 | 1113.5554 | -0.8 | 236   | 245 | 0  | 36.6  | 26 | A | GTEDPELQLL                    | A | -0.5  | 2.94 |              |
| 10  | Q9HNI7 Q9HNI7 | 2 | 1148.6553 | 0.0  | 248   | 258 | 0  | 53.5  | 21 | A | SDPIRAPLLA                    | R | 0.2   | 6.78 |              |
| 10  | Q9HNI7 Q9HNI7 | 1 | 1158.5081 | -0.3 | 56    | 65  | 0  | 27.4  | 23 | A | GVPFDYLESET                   | G | -0.3  | 2.94 |              |
| 10  | Q9HNI7 Q9HNI7 | 2 | 1261.6376 | 0.7  | 155   | 166 | 0  | 35.5  | 27 | S | GSLFPLQMLADA                  | G | 0.8   | 3.1  |              |
| 10  | Q9HNI7 Q9HNI7 | 2 | 1290.7296 | 0.4  | 246   | 258 | 0  | 46.1  | 22 | L | AASDPIRAPLLA                  | R | 0.4   | 6.78 |              |
| 10  | Q9HNI7 Q9HNI7 | 2 | 1299.6306 | 1.0  | 81    | 92  | 0  | 41.3  | 26 | V | LQALENDQADIA                  | D | -0.3  | 2.88 |              |
| 10  | Q9HNI7 Q9HNI7 | 2 | 1527.8145 | 0.1  | 98    | 113 | 0  | 50.0  | 26 | T | LAVVGDNASVTDVVGI              | R | 1.3   | 2.92 |              |
| 10  | Q9HNI7 Q9HNI7 | 2 | 1529.6845 | -0.7 | 83    | 97  | 0  | 75.2  | 25 | Q | ALENDQADIADASPT               | L | -0.6  | 2.78 |              |
| 10  | Q9HNI7 Q9HNI7 | 2 | 1557.8151 | 0.3  | 212   | 225 | 0  | 50.7  | 28 | V | SLPHVPQSQLPEQV                | M | -0.5  | 5.12 |              |
| 10  | Q9HNI7 Q9HNI7 | 2 | 1903.8535 | 0.6  | 127   | 144 | 0  | 28.7  | 26 | I | TTQPDSPIDSLSDLADET            | V | -0.8  | 2.72 |              |
| 10  | Q9HNI7 Q9HNI7 | 2 | 1920.9177 | 0.4  | 75    | 92  | 0  | 97.0  | 28 | A | ADHQAVLQALENDQADIA            | D | -0.3  | 3.5  |              |
| 10  | Q9HNI7 Q9HNI7 | 2 | 1932.0105 | -0.2 | 208   | 225 | 0  | 61.4  | 27 | T | GAFVSLPHVPQSQLPEQV            | M | 0.0   | 5.12 |              |
| 10  | Q9HNI7 Q9HNI7 | 2 | 1974.9211 | -0.9 | 47    | 63  | 0  | 39.5  | 28 | S | DVNVKEQYAGVFDYLES             | E | -0.5  | 3.58 |              |
| 10  | Q9HNI7 Q9HNI7 | 2 | 2090.0797 | 0.5  | 206   | 225 | 0  | 32.4  | 28 | A | GTGAFVSLPHVPQSQLPEQV          | M | 0.0   | 5.12 |              |
| 10  | Q9HNI7 Q9HNI7 | 2 | 2205.0114 | -0.5 | 47    | 65  | 0  | 93.2  | 27 | S | DVNVKEQYAGVFDYLESET           | G | -0.6  | 3.5  |              |
| 10  | Q9HNI7 Q9HNI7 | 2 | 2333.0699 | -0.7 | 47    | 67  | 0  | 85.8  | 27 | S | DVNVKEQYAGVFDYLESETGA         | S | -0.5  | 3.5  |              |
| 10  | Q9HNI7 Q9HNI7 | 2 | 2386.2744 | -0.3 | 236   | 258 | 0  | 54.2  | 26 | A | GTEDPELQLLAASDPIRAPLLA        | R | 0.0   | 3.58 |              |
| 10  | Q9HNI7 Q9HNI7 | 2 | 2392.1142 | 2.5  | 75    | 97  | 0  | 97.3  | 28 | A | ADHQAVLQALENDQADIADASPT       | L | -0.5  | 3.36 |              |
| 10  | Q9HNI7 Q9HNI7 | 2 | 2421.086  | 0.1  | 45    | 65  | 0  | 45.0  | 26 | A | ESDVNVKEQYAGVFDYLESET         | G | -0.8  | 3.44 |              |
| 10  | Q9HNI7 Q9HNI7 | 2 | 2549.1445 | -0.9 | 45    | 67  | 0  | 44.3  | 25 | A | ESDVNVKEQYAGVFDYLESETGA       | S | -0.6  | 3.44 |              |
| 10  | Q9HNI7 Q9HNI7 | 2 | 2758.2821 | 0.0  | 120   | 144 | 0  | 44.0  | 28 | A | SRYFSTITTPDPSIDSLSDLADET      | V | -0.6  | 3.36 |              |
| 11  | Q9HR99 Q9HR99 | 1 | 926.3658  | -1.6 | 79    | 85  | 0  | 44.2  | 19 | V | TWEFEES                       | S | -1.4  | 3.02 |              |
| 11  | Q9HR99 Q9HR99 | 1 | 1032.5162 | -0.5 | 148   | 157 | 0  | 27.5  | 27 | S | GMIGTVVVEE                    | - | 1.1   | 3.12 |              |

| hit | accession     | z | mass      | ppm  | start | end | mc | score | id | - | sequence                           | + | gravy | pl   | modification  |
|-----|---------------|---|-----------|------|-------|-----|----|-------|----|---|------------------------------------|---|-------|------|---------------|
| 11  | Q9HR99 Q9HR99 | 2 | 1119.5482 | 0.5  | 147   | 157 | 0  | 58.1  | 27 | A | SGMIGTVVVEE                        | - | 0.9   | 3.12 |               |
| 11  | Q9HR99 Q9HR99 | 2 | 1150.5295 | 0.3  | 58    | 68  | 0  | 46.1  | 27 | V | APDGGFKFEPES                       | E | -0.8  | 4.08 |               |
| 11  | Q9HR99 Q9HR99 | 3 | 1198.5441 | -0.3 | 90    | 99  | 0  | 34.0  | 24 | V | SAWPDMDHDKI                        | S | -0.9  | 5.1  |               |
| 11  | Q9HR99 Q9HR99 | 2 | 1320.635  | -0.2 | 56    | 68  | 0  | 59.9  | 27 | I | AVAPDGGFKFEPES                     | E | -0.2  | 4.08 |               |
| 11  | Q9HR99 Q9HR99 | 2 | 1348.5783 | 0.5  | 122   | 133 | 0  | 58.3  | 24 | V | DAGETLEHTFET                       | A | -0.9  | 3.68 |               |
| 11  | Q9HR99 Q9HR99 | 2 | 1392.6561 | -0.2 | 58    | 70  | 0  | 57.7  | 27 | V | APDGGFKFEPSEL                      | T | -0.6  | 3.82 |               |
| 11  | Q9HR99 Q9HR99 | 2 | 1419.6154 | -1.8 | 122   | 134 | 0  | 53.4  | 24 | V | DAGETLEHTFETA                      | G | -0.7  | 3.68 |               |
| 11  | Q9HR99 Q9HR99 | 2 | 1473.6195 | -1.5 | 106   | 119 | 0  | 54.2  | 22 | A | SGFGTMDKDGNDQFA                    | V | -0.8  | 3.88 |               |
| 11  | Q9HR99 Q9HR99 | 2 | 1484.6307 | 0.8  | 73    | 85  | 0  | 35.8  | 23 | V | SVGDTVTFEFEES                      | S | -0.5  | 2.88 |               |
| 11  | Q9HR99 Q9HR99 | 2 | 1491.7246 | 2.1  | 57    | 70  | 0  | 58.1  | 28 | A | VAPDGGFKFEPSEL                     | T | -0.3  | 3.82 |               |
| 11  | Q9HR99 Q9HR99 | 2 | 1562.7617 | 2.2  | 56    | 70  | 0  | 65.9  | 29 | I | AVAPDGGFKFEPSEL                    | T | -0.1  | 3.82 |               |
| 11  | Q9HR99 Q9HR99 | 2 | 1592.7722 | -1.0 | 58    | 72  | 0  | 32.0  | 27 | V | APDGGFKFEPSELTV                    | S | -0.3  | 3.82 |               |
| 11  | Q9HR99 Q9HR99 | 2 | 1671.7563 | 0.2  | 106   | 121 | 0  | 44.1  | 26 | A | SGFGTMDKDGNDQFAVV                  | D | -0.2  | 3.88 |               |
| 11  | Q9HR99 Q9HR99 | 2 | 1691.8407 | 0.0  | 57    | 72  | 0  | 40.8  | 28 | A | VAPDGGFKFEPSELTV                   | S | 0.0   | 3.82 |               |
| 11  | Q9HR99 Q9HR99 | 2 | 1738.7985 | -0.5 | 90    | 105 | 0  | 37.8  | 27 | V | SAWPDMDHDKISIPDGA                  | S | -0.6  | 4.16 |               |
| 11  | Q9HR99 Q9HR99 | 2 | 1762.8778 | -1.2 | 56    | 72  | 0  | 53.4  | 28 | I | AVAPDGGFKFEPSELTV                  | S | 0.1   | 3.82 |               |
| 11  | Q9HR99 Q9HR99 | 2 | 1869.7905 | -0.2 | 122   | 138 | 0  | 64.7  | 22 | V | DAGETLEHTFETAGEYT                  | Y | -0.9  | 3.58 |               |
| 11  | Q9HR99 Q9HR99 | 2 | 2004.9793 | 0.7  | 51    | 70  | 0  | 36.4  | 29 | S | GGNTIAVAPDGGFKFEPSEL               | T | -0.1  | 3.82 |               |
| 11  | Q9HR99 Q9HR99 | 2 | 2131.9222 | -0.5 | 122   | 140 | 0  | 53.7  | 23 | V | DAGETLEHTFETAGEITYV                | C | -0.7  | 3.58 |               |
| 11  | Q9HR99 Q9HR99 | 3 | 2176.0007 | -2.3 | 86    | 105 | 0  | 39.2  | 27 | S | SHNVSAPDMDHDKISIPDGA               | S | -0.6  | 5.02 |               |
| 11  | Q9HR99 Q9HR99 | 2 | 2205.0954 | -1.4 | 51    | 72  | 0  | 51.6  | 29 | S | GGNTIAVAPDGGFKFEPSELTV             | S | 0.0   | 3.82 |               |
| 11  | Q9HR99 Q9HR99 | 2 | 2307.1019 | -1.8 | 48    | 70  | 0  | 61.1  | 29 | A | SQSGGNTIAVAPDGGFKFEPSEL            | T | -0.3  | 3.82 |               |
| 11  | Q9HR99 Q9HR99 | 2 | 2507.218  | -2.2 | 48    | 72  | 0  | 56.6  | 28 | A | SQSGGNTIAVAPDGGFKFEPSELTV          | S | -0.2  | 3.82 |               |
| 11  | Q9HR99 Q9HR99 | 3 | 3523.5362 | -1.5 | 106   | 138 | 0  | 37.4  | 22 | A | SGFGTMDKDGNDQFAVVDAGETLEHTFETAGEYT | Y | -0.6  | 3.68 |               |
| 12  | P16102 BACH   | 1 | 558.3166  | 0.5  | 61    | 65  | 0  | 25.7  | 23 | R | LIWGA                              | T | 1.8   | 6.02 |               |
| 12  | P16102 BACH   | 1 | 609.3527  | -1.6 | 171   | 175 | 0  | 26.1  | 23 | A | FFVVV                              | L | 3.6   | 6.02 |               |
| 12  | P16102 BACH   | 1 | 664.3796  | -2.0 | 76    | 81  | 0  | 39.4  | 24 | S | SYLGLL                             | S | 1.5   | 5.92 |               |
| 12  | P16102 BACH   | 1 | 678.3952  | -0.9 | 133   | 138 | 0  | 23.1  | 22 | G | SLFTVI                             | A | 2.3   | 6.02 |               |
| 12  | P16102 BACH   | 1 | 700.3908  | -0.1 | 33    | 38  | 0  | 23.6  | 22 | S | LWVNVA                             | L | 1.6   | 6.02 |               |
| 12  | P16102 BACH   | 1 | 722.4367  | 0.7  | 171   | 176 | 0  | 37.5  | 13 | A | FFVVVL                             | S | 3.7   | 6.02 |               |
| 12  | P16102 BACH   | 1 | 872.5041  | -1.0 | 66    | 73  | 0  | 28.9  | 20 | A | TLMIPLVS                           | I | 1.9   | 6.02 |               |
| 12  | P16102 BACH   | 1 | 883.5379  | -1.0 | 121   | 129 | 0  | 32.5  | 23 | L | LALGLLADV                          | D | 2.1   | 3.1  |               |
| 12  | P16102 BACH   | 1 | 921.5171  | -0.1 | 76    | 84  | 0  | 32.3  | 22 | S | SYLGLLSGL                          | T | 1.3   | 5.92 |               |
| 12  | P16102 BACH   | 1 | 939.5753  | 1.0  | 35    | 44  | 0  | 24.7  | 22 | W | VNVALAGIAI                         | L | 2.3   | 6.02 |               |
| 12  | P16102 BACH   | 1 | 963.5277  | -0.5 | 130   | 138 | 0  | 25.8  | 23 | V | DLGSLFTVI                          | A | 1.5   | 3.1  |               |
| 12  | P16102 BACH   | 2 | 985.5882  | 0.8  | 66    | 74  | 0  | 45.9  | 22 | A | TLMIPLVSI                          | S | 2.2   | 6.02 |               |
| 12  | P16102 BACH   | 1 | 1001.5831 | -2.0 | 66    | 74  | 0  | 28.2  | 20 | A | TLMIPLVSI                          | S | 2.2   | 6.02 | Oxidation (M) |
| 12  | P16102 BACH   | 2 | 1022.5648 | 0.7  | 76    | 85  | 0  | 39.6  | 22 | S | SYLGLLSGLT                         | V | 1.1   | 5.92 |               |
| 12  | P16102 BACH   | 2 | 1072.6202 | 0.6  | 66    | 75  | 0  | 53.7  | 22 | A | TLMIPLVSI                          | S | 1.9   | 6.02 |               |
| 12  | P16102 BACH   | 1 | 1088.6151 | 0.4  | 66    | 75  | 0  | 34.5  | 21 | A | TLMIPLVSI                          | S | 1.9   | 6.02 | Oxidation (M) |

| hit | accession     | z | mass      | ppm  | start | end | mc | score | id | - | sequence                | + | gravy | pl   | modification  |
|-----|---------------|---|-----------|------|-------|-----|----|-------|----|---|-------------------------|---|-------|------|---------------|
| 12  | P16102 BACH   | 2 | 1121.6332 | 1.1  | 76    | 86  | 0  | 48.3  | 21 | S | SYLGLLSGLTV             | G | 1.4   | 5.92 |               |
| 12  | P16102 BACH   | 2 | 1177.6231 | 0.8  | 128   | 138 | 0  | 49.6  | 25 | A | DVDLGSLFTVI             | A | 1.3   | 2.92 |               |
| 12  | P16102 BACH   | 2 | 1178.6547 | -0.1 | 76    | 87  | 0  | 71.3  | 23 | S | SYLGLLSGLTVG            | M | 1.2   | 5.92 |               |
| 12  | P16102 BACH   | 2 | 1208.6653 | -0.2 | 75    | 86  | 0  | 36.8  | 23 | I | SSYLGLLSGLTV            | G | 1.2   | 5.92 |               |
| 12  | P16102 BACH   | 2 | 1403.8024 | 0.4  | 194   | 205 | 0  | 28.5  | 21 | A | EIFDTRLRVLTVV           | L | 1.2   | 4.08 |               |
| 12  | P16102 BACH   | 2 | 1628.9211 | -0.2 | 61    | 75  | 0  | 26.7  | 23 | R | LIWGATLMIPLVIS          | S | 1.8   | 6.02 | Oxidation (M) |
| 12  | P16102 BACH   | 2 | 1866.9471 | -0.1 | 76    | 93  | 0  | 49.4  | 27 | S | SYLGLLSGLTVGMIEMPA      | G | 1.1   | 3.3  | Oxidation (M) |
| 12  | P16102 BACH   | 2 | 1937.9842 | -0.1 | 75    | 93  | 0  | 36.2  | 27 | I | SSYLGLLSGLTVGMIEMPA     | G | 1.0   | 3.3  |               |
| 13  | Q9HS51 Q9HS51 | 1 | 545.3213  | 0.4  | 169   | 173 | 0  | 25.1  | 24 | A | LVAPF                   | T | 2.2   | 6.02 |               |
| 13  | Q9HS51 Q9HS51 | 2 | 1204.5459 | 1.2  | 158   | 168 | 0  | 63.7  | 26 | S | TIVDVDDEQTA             | L | -0.4  | 2.78 |               |
| 13  | Q9HS51 Q9HS51 | 2 | 1237.6455 | 0.5  | 105   | 114 | 0  | 31.9  | 25 | T | VREDPVIQPW              | T | -0.6  | 4.08 |               |
| 13  | Q9HS51 Q9HS51 | 2 | 1294.5929 | -1.2 | 138   | 149 | 0  | 33.1  | 27 | S | DDTVYGDVLDLA            | S | 0.1   | 2.74 |               |
| 13  | Q9HS51 Q9HS51 | 2 | 1340.6725 | 0.1  | 106   | 116 | 0  | 43.8  | 26 | V | REDPVIQPWTT             | L | -1.1  | 4.08 |               |
| 13  | Q9HS51 Q9HS51 | 2 | 1439.7409 | 0.6  | 105   | 116 | 0  | 53.9  | 27 | T | VREDPVIQPWTT            | L | -0.6  | 4.08 |               |
| 13  | Q9HS51 Q9HS51 | 2 | 1453.7565 | 1.9  | 106   | 117 | 0  | 55.9  | 27 | V | REDPVIQPWTTL            | S | -0.7  | 4.08 |               |
| 13  | Q9HS51 Q9HS51 | 2 | 1552.825  | -0.3 | 105   | 117 | 0  | 84.0  | 26 | T | VREDPVIQPWTTL           | S | -0.3  | 4.08 |               |
| 13  | Q9HS51 Q9HS51 | 2 | 1790.9163 | -0.9 | 59    | 75  | 0  | 47.3  | 28 | I | TFTQDQTTVSRGGVVPV       | T | -0.1  | 6.78 |               |
| 13  | Q9HS51 Q9HS51 | 2 | 1860.849  | -1.1 | 51    | 68  | 0  | 50.5  | 26 | A | GASDGHPIFTQDQTTVS       | R | -0.6  | 3.88 |               |
| 13  | Q9HS51 Q9HS51 | 2 | 1981.8654 | 3.7  | 76    | 93  | 0  | 81.7  | 24 | V | TLGNDDADEIGLNPHDWT      | V | -1.0  | 3.36 |               |
| 13  | Q9HS51 Q9HS51 | 3 | 2152.1277 | 0.0  | 105   | 123 | 0  | 54.2  | 27 | T | VREDPVIQPWTTLSAGDRI     | H | -0.4  | 4.3  |               |
| 13  | Q9HS51 Q9HS51 | 2 | 2243.9971 | -0.4 | 76    | 95  | 0  | 61.4  | 25 | V | TLGNDDADEIGLNPHDWTVY    | R | -0.8  | 3.36 |               |
| 13  | Q9HS51 Q9HS51 | 2 | 2295.1159 | -0.1 | 156   | 176 | 0  | 42.2  | 28 | A | FSTIVDVDEQTAALVAPFTVE   | - | 0.4   | 2.76 |               |
| 13  | Q9HS51 Q9HS51 | 2 | 2308.0231 | 0.0  | 127   | 149 | 0  | 51.7  | 25 | R | VGVGADPDTSDTVYGDVLDLA   | S | -0.1  | 2.6  |               |
| 14  | Q9HHN1 Q9HHN1 | 1 | 653.4112  | 1.2  | 22    | 27  | 0  | 29.2  | 24 | G | QALLPI                  | A | 1.5   | 6.02 |               |
| 14  | Q9HHN1 Q9HHN1 | 1 | 782.4902  | 0.6  | 370   | 377 | 0  | 22.4  | 22 | V | TALGPLVI                | N | 1.9   | 6.02 |               |
| 14  | Q9HHN1 Q9HHN1 | 1 | 926.4538  | -0.3 | 110   | 116 | 0  | 29.4  | 25 | M | YWGLEFL                 | T | 0.6   | 3.3  |               |
| 14  | Q9HHN1 Q9HHN1 | 2 | 941.595   | 1.2  | 120   | 128 | 0  | 48.7  | 16 | A | VFVPLAALL               | S | 2.7   | 6.02 |               |
| 14  | Q9HHN1 Q9HHN1 | 1 | 1050.6073 | -1.1 | 152   | 163 | 0  | 27.1  | 21 | V | GIGSGLGIPAPL            | T | 1.1   | 6.02 |               |
| 14  | Q9HHN1 Q9HHN1 | 2 | 1084.4826 | 1.7  | 192   | 200 | 0  | 27.8  | 24 | V | SDVDLWDHV               | R | -0.4  | 3.6  |               |
| 14  | Q9HHN1 Q9HHN1 | 1 | 1195.5914 | -1.9 | 110   | 119 | 0  | 28.2  | 28 | M | YWGLEFLTPA              | V | 0.4   | 3.3  |               |
| 14  | Q9HHN1 Q9HHN1 | 2 | 1333.7969 | 0.6  | 149   | 163 | 0  | 40.8  | 18 | I | ALVGIGSGLGIPAPL         | T | 1.5   | 6.02 |               |
| 14  | Q9HHN1 Q9HHN1 | 2 | 1333.7969 | 0.6  | 148   | 162 | 0  | 41.7  | 18 | G | IALVGIGSGLGIPAP         | L | 1.6   | 6.02 |               |
| 14  | Q9HHN1 Q9HHN1 | 2 | 1405.7453 | 0.1  | 301   | 314 | 0  | 52.1  | 25 | I | IYSGTGPKTGVDLV          | N | 0.2   | 6.68 |               |
| 14  | Q9HHN1 Q9HHN1 | 2 | 1545.9171 | 0.6  | 120   | 134 | 0  | 48.3  | 19 | A | VFVPLAALLSFVVAT         | A | 2.4   | 6.02 |               |
| 14  | Q9HHN1 Q9HHN1 | 2 | 1571.674  | 0.4  | 395   | 407 | 0  | 61.1  | 23 | T | FRDLNDEYDLDT            | S | -1.3  | 3.36 |               |
| 14  | Q9HHN1 Q9HHN1 | 2 | 1581.8978 | -1.6 | 361   | 377 | 0  | 22.8  | 22 | V | DSVGGATLV TALGPLVI      | N | 1.4   | 3.1  |               |
| 14  | Q9HHN1 Q9HHN1 | 3 | 1672.7369 | 0.0  | 8     | 21  | 0  | 34.8  | 25 | R | SYEDFDPEKRPSFG          | Q | -1.7  | 4.06 |               |
| 14  | Q9HHN1 Q9HHN1 | 2 | 1803.7621 | -2.7 | 393   | 407 | 0  | 53.3  | 22 | G | MTFRDLNDEYDLDT          | S | -1.1  | 3.36 |               |
| 14  | Q9HHN1 Q9HHN1 | 2 | 2038.9881 | -1.6 | 166   | 185 | 0  | 58.3  | 28 | A | GAILSGVYMGDKQSPLSDTT    | L | -0.1  | 3.88 |               |
| 14  | Q9HHN1 Q9HHN1 | 2 | 2336.1934 | -0.5 | 166   | 188 | 0  | 45.4  | 28 | A | GAILSGVYMGDKQSPLSDTTLLA | S | 0.3   | 3.88 |               |

| hit | accession       | z | mass      | ppm  | start | end | mc | score | id | - | sequence                     | + | gravy | pl   | modification |
|-----|-----------------|---|-----------|------|-------|-----|----|-------|----|---|------------------------------|---|-------|------|--------------|
| 14  | Q9HHN1 Q9HHN1   | 3 | 2430.1128 | -0.2 | 2     | 21  | 0  | 38.6  | 27 | M | VEFEPRSYEDFDPEKRPSFG         | Q | -1.5  | 4.12 |              |
| 14  | Q9HHN1 Q9HHN1   | 3 | 2608.2302 | 0.3  | 411   | 434 | 0  | 47.2  | 28 | S | RTLEETGTVSEPMIPWNSGGVFMA     | S | -0.1  | 3.96 |              |
| 15  | Q9HMMW4 Q9HMMW4 | 1 | 1130.5033 | 1.5  | 406   | 415 | 0  | 54.4  | 26 | T | WGPYAPENPT                   | T | -1.3  | 3.3  |              |
| 15  | Q9HMMW4 Q9HMMW4 | 2 | 1296.6463 | -1.4 | 181   | 192 | 0  | 51.8  | 27 | S | HLFNVGADNTPI                 | T | 0.1   | 4.94 |              |
| 15  | Q9HMMW4 Q9HMMW4 | 2 | 1578.7467 | -0.4 | 402   | 415 | 0  | 36.8  | 28 | T | LHPTWGPYAPENPT               | T | -1.1  | 5.12 |              |
| 15  | Q9HMMW4 Q9HMMW4 | 2 | 1682.8111 | -0.4 | 62    | 76  | 0  | 84.0  | 27 | T | SSPDTELQPENIPR               | G | -1.4  | 3.82 |              |
| 15  | Q9HMMW4 Q9HMMW4 | 2 | 1709.822  | -1.9 | 63    | 78  | 0  | 64.8  | 28 | S | SPDTETLQPENIPRGG             | T | -1.3  | 3.82 |              |
| 15  | Q9HMMW4 Q9HMMW4 | 2 | 1796.8541 | -1.2 | 62    | 78  | 0  | 71.2  | 27 | T | SSPDTELQPENIPRGG             | T | -1.3  | 3.82 |              |
| 15  | Q9HMMW4 Q9HMMW4 | 2 | 1808.8653 | -0.4 | 86    | 103 | 0  | 51.3  | 28 | T | STTNGLNAFRIGDQQTSA           | R | -0.5  | 6.78 |              |
| 15  | Q9HMMW4 Q9HMMW4 | 2 | 1828.9148 | 0.8  | 206   | 221 | 0  | 34.9  | 28 | T | IPEPRPFFPYNEPLGG             | M | -0.7  | 4.26 |              |
| 15  | Q9HMMW4 Q9HMMW4 | 2 | 1865.8948 | 0.1  | 176   | 192 | 0  | 56.7  | 28 | T | AFTYSHLFNVGADNTPI            | T | 0.1   | 4.94 |              |
| 15  | Q9HMMW4 Q9HMMW4 | 2 | 1921.8959 | -0.9 | 399   | 415 | 0  | 33.4  | 27 | V | QNTLHPTWGPYAPENPT            | T | -1.3  | 5.12 |              |
| 15  | Q9HMMW4 Q9HMMW4 | 2 | 2230.0237 | -0.6 | 57    | 76  | 0  | 94.8  | 27 | A | TSEETSSPDTELQPENIPR          | G | -1.5  | 3.58 |              |
| 15  | Q9HMMW4 Q9HMMW4 | 3 | 2784.1648 | -1.3 | 505   | 529 | 0  | 21.8  | 20 | G | FSGEPGYGDENRQPSDYNRGPQDEA    | V | -2.0  | 3.76 |              |
| 15  | Q9HMMW4 Q9HMMW4 | 3 | 2883.2332 | -1.1 | 505   | 530 | 0  | 74.7  | 21 | G | FSGEPGYGDENRQPSDYNRGPQDEAV   | S | -1.8  | 3.76 |              |
| 15  | Q9HMMW4 Q9HMMW4 | 3 | 3041.3023 | -1.5 | 505   | 532 | 0  | 32.3  | 21 | G | FSGEPGYGDENRQPSDYNRGPQDEAVSA | Q | -1.6  | 3.76 |              |
| 16  | Q48302 Q48302   | 1 | 613.3799  | -0.2 | 28    | 34  | 0  | 41.8  | 29 | A | AALAVGL                      | A | 2.4   | 6.02 |              |
| 16  | Q48302 Q48302   | 1 | 684.417   | 0.4  | 28    | 35  | 0  | 40.0  | 27 | A | AALAVGLA                     | A | 2.3   | 6.02 |              |
| 16  | Q48302 Q48302   | 1 | 755.4541  | 1.3  | 28    | 36  | 0  | 25.5  | 25 | A | AALAVGLAA                    | L | 2.3   | 6.02 |              |
| 16  | Q48302 Q48302   | 1 | 805.4375  | 0.5  | 83    | 89  | 0  | 31.9  | 20 | V | FVVPTPF                      | - | 1.4   | 6.02 |              |
| 16  | Q48302 Q48302   | 1 | 882.5426  | -1.1 | 69    | 76  | 0  | 27.5  | 17 | T | VLPETLVI                     | L | 1.8   | 3.3  |              |
| 16  | Q48302 Q48302   | 1 | 904.5059  | -0.7 | 82    | 89  | 0  | 39.3  | 25 | V | VFVVPTPF                     | - | 1.8   | 6.02 |              |
| 16  | Q48302 Q48302   | 1 | 983.5903  | -0.5 | 68    | 76  | 0  | 24.6  | 23 | L | TVLPETLVI                    | L | 1.6   | 3.3  |              |
| 16  | Q48302 Q48302   | 1 | 1003.5743 | 0.3  | 81    | 89  | 0  | 38.0  | 24 | V | VFVVPTPF                     | - | 2.1   | 6.02 |              |
| 16  | Q48302 Q48302   | 1 | 1010.6124 | 0.4  | 28    | 39  | 0  | 38.4  | 22 | A | AALAVGLAALAA                 | G | 2.3   | 6.02 |              |
| 16  | Q48302 Q48302   | 1 | 1076.5026 | -1.0 | 54    | 63  | 0  | 32.7  | 27 | A | IAEDPDLFGT                   | G | 0.0   | 2.88 |              |
| 16  | Q48302 Q48302   | 2 | 1348.6735 | -0.7 | 39    | 53  | 0  | 36.4  | 27 | A | AGYAERGIGSAAVGA              | I | 0.4   | 6.88 |              |
| 16  | Q48302 Q48302   | 2 | 1359.6922 | 1.0  | 54    | 66  | 0  | 43.2  | 28 | A | IAEDPDLFGTGLI                | L | 0.6   | 2.88 |              |
| 16  | Q48302 Q48302   | 2 | 1871.9662 | -0.3 | 9     | 27  | 0  | 55.5  | 28 | L | STILAETGSNMPAITPKAA          | A | 0.2   | 6.94 |              |
| 16  | Q48302 Q48302   | 2 | 1901.037  | -0.4 | 28    | 48  | 0  | 46.5  | 25 | A | AALAVGLAALAAGYAERGIGS        | A | 1.1   | 6.88 |              |
| 16  | Q48302 Q48302   | 3 | 1972.0741 | 1.0  | 28    | 49  | 0  | 66.8  | 26 | A | AALAVGLAALAAGYAERGIGSA       | A | 1.1   | 6.88 |              |
| 16  | Q48302 Q48302   | 3 | 2270.2382 | -0.1 | 28    | 53  | 0  | 47.9  | 25 | A | AALAVGLAALAAGYAERGIGSAAVGA   | I | 1.2   | 6.88 |              |
| 17  | Q9HSA8 Q9HSA8   | 1 | 569.4152  | 0.2  | 33    | 37  | 0  | 28.5  | 17 | G | LLLLV                        | L | 3.9   | 6.02 |              |
| 17  | Q9HSA8 Q9HSA8   | 1 | 830.4538  | 1.3  | 289   | 295 | 0  | 30.9  | 24 | T | FVLPQEV                      | T | 0.9   | 3.3  |              |
| 17  | Q9HSA8 Q9HSA8   | 2 | 1128.5339 | -1.3 | 124   | 132 | 0  | 59.8  | 26 | A | FLEVDDYKT                    | A | -0.6  | 3.7  |              |
| 17  | Q9HSA8 Q9HSA8   | 2 | 1199.571  | 0.3  | 124   | 133 | 0  | 62.4  | 26 | A | FLEVDDYKTA                   | V | -0.4  | 3.7  |              |
| 17  | Q9HSA8 Q9HSA8   | 2 | 1200.551  | -1.1 | 348   | 358 | 0  | 28.9  | 25 | A | DVDPADLEEKA                  | E | -1.0  | 3.42 |              |
| 17  | Q9HSA8 Q9HSA8   | 2 | 1274.5965 | -0.1 | 83    | 92  | 0  | 46.2  | 27 | T | YTFDMRTQTI                   | D | -0.6  | 6.7  |              |
| 17  | Q9HSA8 Q9HSA8   | 2 | 1324.5089 | 0.2  | 308   | 321 | 0  | 21.9  | 17 | A | GSDVGDGGSDLESM               | A | -0.6  | 2.78 |              |
| 17  | Q9HSA8 Q9HSA8   | 2 | 1559.7104 | 0.8  | 166   | 178 | 0  | 39.6  | 26 | I | RTELDEPTDEWGI                | R | -1.4  | 3.5  |              |

| hit | accession     | z | mass      | ppm  | start | end | mc | score | id | - | sequence              | + | gravy | pl   | modification |
|-----|---------------|---|-----------|------|-------|-----|----|-------|----|---|-----------------------|---|-------|------|--------------|
| 17  | Q9HSA8 Q9HSA8 | 2 | 1785.8632 | -0.2 | 332   | 347 | 0  | 29.6  | 27 | I | GLDNIDEILNQITEEA      | D | -0.4  | 2.8  |              |
| 17  | Q9HSA8 Q9HSA8 | 2 | 1855.8912 | 0.0  | 359   | 376 | 0  | 67.8  | 28 | A | EAVQRGEDAGLQDAGEVI    | E | -0.5  | 3.5  |              |
| 17  | Q9HSA8 Q9HSA8 | 2 | 1898.9473 | -0.5 | 331   | 347 | 0  | 55.1  | 28 | L | IGLDNIDEILNQITEEA     | D | -0.1  | 2.8  |              |
| 17  | Q9HSA8 Q9HSA8 | 2 | 1926.9283 | -1.1 | 181   | 197 | 0  | 56.3  | 28 | V | ESVEVREVNPSQEVQQA     | M | -1.0  | 3.8  |              |
| 17  | Q9HSA8 Q9HSA8 | 3 | 1987.9884 | 1.1  | 145   | 161 | 0  | 44.1  | 29 | A | VLGDMELDDTLNKRQEI     | N | -0.7  | 3.84 |              |
| 17  | Q9HSA8 Q9HSA8 | 2 | 2091.0008 | -0.7 | 322   | 339 | 0  | 52.0  | 28 | M | AFDEETRELIGLDNIDEI    | L | -0.4  | 3.32 |              |
| 17  | Q9HSA8 Q9HSA8 | 3 | 2182.0978 | -0.7 | 179   | 197 | 0  | 36.5  | 28 | I | RVESVEVREVNPSQEVQQA   | M | -0.9  | 4.26 |              |
| 17  | Q9HSA8 Q9HSA8 | 2 | 2203.1677 | -0.6 | 61    | 80  | 0  | 39.5  | 27 | V | FGEYRGLLEPGINVIPIFVS  | R | 0.4   | 4.26 |              |
| 18  | Q9HRL3 Q9HRL3 | 1 | 685.4374  | -0.9 | 252   | 258 | 0  | 26.3  | 26 | F | SVVGLLV               | L | 2.7   | 6.02 |              |
| 18  | Q9HRL3 Q9HRL3 | 1 | 887.4752  | 1.7  | 2     | 10  | 0  | 26.1  | 25 | M | AGALEFIPA             | I | 1.2   | 3.3  |              |
| 18  | Q9HRL3 Q9HRL3 | 1 | 991.4143  | 1.0  | 350   | 357 | 0  | 26.5  | 22 | I | SQYGYMML              | G | 0.0   | 5.86 |              |
| 18  | Q9HRL3 Q9HRL3 | 2 | 1012.5375 | -3.0 | 286   | 295 | 0  | 35.9  | 25 | V | SALIHAATMV            | A | 1.5   | 7.84 |              |
| 18  | Q9HRL3 Q9HRL3 | 1 | 1103.5651 | 0.0  | 586   | 595 | 0  | 39.3  | 27 | A | WLLYSGPAPT            | K | 0.2   | 5.92 |              |
| 18  | Q9HRL3 Q9HRL3 | 1 | 1221.5918 | -0.2 | 411   | 421 | 0  | 32.5  | 27 | V | TYYTFLSGSLA           | L | 0.6   | 5.86 |              |
| 18  | Q9HRL3 Q9HRL3 | 1 | 1301.7231 | 0.2  | 442   | 454 | 0  | 31.7  | 24 | A | LIYGAGDSPILLA         | A | 1.2   | 3.1  |              |
| 18  | Q9HRL3 Q9HRL3 | 1 | 1311.6169 | -1.1 | 274   | 285 | 0  | 31.9  | 27 | T | WLPDAMEGPTPV          | S | -0.2  | 3    |              |
| 18  | Q9HRL3 Q9HRL3 | 2 | 1561.7624 | 0.3  | 634   | 648 | 0  | 67.1  | 28 | A | DTFDQGVIGVNAV         | S | 0.5   | 2.82 |              |
| 18  | Q9HRL3 Q9HRL3 | 2 | 1642.8719 | -0.9 | 579   | 595 | 0  | 49.6  | 27 | A | LGGAGLAWLLYSGPAPT     | K | 0.7   | 5.92 |              |
| 18  | Q9HRL3 Q9HRL3 | 2 | 1826.9931 | -0.3 | 577   | 595 | 0  | 61.1  | 26 | A | LALGGAGLAWLLYSGPAPT   | K | 0.9   | 5.92 |              |
| 18  | Q9HRL3 Q9HRL3 | 2 | 1916.9592 | 0.5  | 630   | 648 | 0  | 81.9  | 28 | L | ARGADTFDQGVIGVNAV     | S | 0.3   | 3.6  |              |
| 18  | Q9HRL3 Q9HRL3 | 2 | 2093.9734 | -0.7 | 607   | 622 | 0  | 56.1  | 27 | T | LLYNNYYQDEYQVWLA      | K | -0.6  | 3    |              |
| 18  | Q9HRL3 Q9HRL3 | 2 | 2106.0245 | 0.4  | 267   | 285 | 0  | 55.7  | 29 | S | AQFPLHTWLPDAMEGPTPV   | S | -0.1  | 4.06 |              |
| 19  | Q9HPQ5 Q9HPQ5 | 1 | 567.3996  | -1.9 | 54    | 58  | 0  | 30.4  | 17 | H | IPLLL                 | A | 2.9   | 6.02 |              |
| 19  | Q9HPQ5 Q9HPQ5 | 1 | 617.3206  | -3.9 | 306   | 312 | 0  | 34.7  | 27 | D | AMAAIAA               | S | 2.2   | 6.02 |              |
| 19  | Q9HPQ5 Q9HPQ5 | 1 | 674.4367  | -1.0 | 193   | 198 | 0  | 24.6  | 21 | G | AFVLLL                | A | 3.4   | 6.02 |              |
| 19  | Q9HPQ5 Q9HPQ5 | 1 | 731.4582  | 0.7  | 192   | 198 | 0  | 24.3  | 23 | H | GAFVLLL               | A | 2.8   | 6.02 |              |
| 19  | Q9HPQ5 Q9HPQ5 | 1 | 745.3792  | 0.3  | 462   | 468 | 0  | 43.3  | 27 | T | NMLALNA               | N | 0.9   | 6.02 |              |
| 19  | Q9HPQ5 Q9HPQ5 | 1 | 1103.4982 | -0.4 | 339   | 349 | 0  | 26.9  | 26 | A | SEDADAGVVEI           | E | 0.1   | 2.84 |              |
| 19  | Q9HPQ5 Q9HPQ5 | 2 | 1181.702  | -0.9 | 85    | 97  | 0  | 42.0  | 21 | A | AELGIVGALVGLA         | S | 1.9   | 3.3  |              |
| 19  | Q9HPQ5 Q9HPQ5 | 2 | 1317.63   | 0.7  | 485   | 496 | 0  | 51.6  | 27 | V | VADEVKDLAEEET         | R | -0.5  | 3.5  |              |
| 19  | Q9HPQ5 Q9HPQ5 | 2 | 1415.6351 | -0.1 | 297   | 309 | 0  | 39.1  | 25 | V | RLDPDVENDAMAA         | I | -0.6  | 3.5  |              |
| 19  | Q9HPQ5 Q9HPQ5 | 2 | 1460.7107 | -1.6 | 522   | 535 | 0  | 31.4  | 28 | A | RTADESVQDAISAV        | D | -0.2  | 3.7  |              |
| 19  | Q9HPQ5 Q9HPQ5 | 2 | 1517.7461 | 0.7  | 448   | 461 | 0  | 51.4  | 28 | I | SEIVDLISDVAEQT        | N | 0.2   | 2.84 |              |
| 19  | Q9HPQ5 Q9HPQ5 | 2 | 1993.9117 | 0.5  | 533   | 552 | 0  | 75.6  | 26 | I | SAVDAVVDAFGTVAENAEEET | D | 0.3   | 2.8  |              |
| 19  | Q9HPQ5 Q9HPQ5 | 3 | 2056.0072 | -0.7 | 228   | 245 | 0  | 39.2  | 28 | A | QQVEDLEARQAEIEAEKA    | E | -1.1  | 3.88 |              |
| 20  | P33741 HTR1   | 2 | 1547.67   | -0.1 | 244   | 257 | 0  | 76.7  | 24 | A | NDQRTELSAADDV         | Q | -1.4  | 3.36 |              |
| 20  | P33741 HTR1   | 2 | 1734.7809 | 1.2  | 350   | 367 | 0  | 52.9  | 26 | A | RAGGNADGDGFSVVADEV    | K | -0.2  | 3.5  |              |
| 20  | P33741 HTR1   | 2 | 1902.8555 | -1.8 | 244   | 260 | 0  | 104.4 | 26 | A | NDQRTELSAADDVQQV      | S | -1.3  | 3.36 |              |
| 20  | P33741 HTR1   | 3 | 2096.0031 | 0.5  | 186   | 204 | 0  | 50.0  | 28 | T | VGTAFNQMMDDLQATVRTV   | T | 0.1   | 3.88 |              |
| 20  | P33741 HTR1   | 2 | 2318.0258 | -2.0 | 240   | 260 | 0  | 71.6  | 24 | I | ESQANDQRTELSAADDVQQV  | S | -1.3  | 3.32 |              |

| hit | accession     | z | mass      | ppm  | start | end | mc | score | id | - | sequence                 | + | gravy | pl   | modification  |
|-----|---------------|---|-----------|------|-------|-----|----|-------|----|---|--------------------------|---|-------|------|---------------|
| 20  | P33741 HTR1   | 3 | 2646.2369 | -0.5 | 237   | 260 | 0  | 49.9  | 28 | V | SKIESQANDQRTELDSAADDVQQV | S | -1.2  | 3.68 |               |
| 21  | Q9HN95 Q9HN95 | 1 | 657.301   | 0.5  | 58    | 62  | 0  | 25.3  | 22 | A | DYFLT                    | Y | 0.2   | 3.1  |               |
| 21  | Q9HN95 Q9HN95 | 2 | 940.5018  | 1.1  | 454   | 463 | 0  | 35.0  | 21 | V | LAPGSPGFPV               | - | 0.6   | 6.02 |               |
| 21  | Q9HN95 Q9HN95 | 1 | 1034.547  | -0.5 | 197   | 205 | 0  | 33.2  | 26 | T | NTFMLLLPS                | L | 1.1   | 6.02 |               |
| 21  | Q9HN95 Q9HN95 | 1 | 1089.5859 | -1.3 | 297   | 305 | 0  | 31.7  | 26 | V | AYWLVQPIT                | G | 0.7   | 5.92 |               |
| 21  | Q9HN95 Q9HN95 | 2 | 1103.6379 | 0.5  | 143   | 151 | 0  | 44.6  | 22 | A | WYTILPKLA                | G | 0.6   | 9.72 |               |
| 21  | Q9HN95 Q9HN95 | 2 | 1450.8224 | -0.8 | 140   | 151 | 0  | 32.6  | 23 | A | YLAWYTIKPKLA             | G | 0.8   | 9.52 |               |
| 21  | Q9HN95 Q9HN95 | 2 | 1645.8716 | 0.8  | 9     | 24  | 0  | 39.7  | 27 | A | AITILNGFAPELPFGS         | A | 0.8   | 3.3  |               |
| 21  | Q9HN95 Q9HN95 | 2 | 1716.9087 | -0.3 | 9     | 25  | 0  | 48.9  | 27 | A | AITILNGFAPELPFGSA        | N | 0.9   | 3.3  |               |
| 21  | Q9HN95 Q9HN95 | 2 | 1931.0404 | -0.1 | 6     | 24  | 0  | 53.5  | 26 | T | TLAAITILNGFAPELPFGS      | A | 1.0   | 3.3  |               |
| 21  | Q9HN95 Q9HN95 | 2 | 2002.0775 | -0.7 | 6     | 25  | 0  | 34.9  | 26 | T | TLAAITILNGFAPELPFGSA     | N | 1.0   | 3.3  |               |
| 22  | Q9HRL1 Q9HRL1 | 1 | 613.3112  | 0.3  | 16    | 20  | 0  | 29.0  | 21 | E | FYALT                    | L | 1.3   | 5.92 |               |
| 22  | Q9HRL1 Q9HRL1 | 1 | 628.416   | 0.0  | 379   | 384 | 0  | 29.5  | 25 | G | TIALLV                   | A | 2.9   | 6.02 |               |
| 22  | Q9HRL1 Q9HRL1 | 1 | 654.3377  | 0.9  | 259   | 264 | 0  | 30.0  | 22 | N | TGAFLF                   | V | 1.7   | 6.02 |               |
| 22  | Q9HRL1 Q9HRL1 | 1 | 685.4374  | -0.9 | 378   | 384 | 0  | 26.4  | 26 | V | GTIALLV                  | A | 2.4   | 6.02 |               |
| 22  | Q9HRL1 Q9HRL1 | 1 | 850.4225  | -1.1 | 184   | 190 | 0  | 45.8  | 28 | I | DWSLLFA                  | A | 1.0   | 3.1  |               |
| 22  | Q9HRL1 Q9HRL1 | 1 | 962.5107  | -3.2 | 73    | 82  | 0  | 30.6  | 27 | L | IGALSSGVML               | Y | 1.8   | 6.02 | Oxidation (M) |
| 22  | Q9HRL1 Q9HRL1 | 2 | 1143.6328 | 0.8  | 309   | 318 | 0  | 31.2  | 26 | A | GFLSKYVLFA               | G | 1.3   | 9.72 |               |
| 22  | Q9HRL1 Q9HRL1 | 2 | 1179.6362 | 1.8  | 296   | 306 | 0  | 37.3  | 24 | T | VFMFSLAGLPV              | G | 2.0   | 6.02 |               |
| 22  | Q9HRL1 Q9HRL1 | 2 | 1235.4942 | 0.0  | 3     | 13  | 0  | 36.5  | 20 | A | SHDYLDADSV               | A | -0.9  | 3.42 |               |
| 22  | Q9HRL1 Q9HRL1 | 2 | 1940.948  | -1.4 | 350   | 366 | 0  | 66.2  | 28 | A | LWIEDPRDDL SLSGQPT       | G | -0.8  | 3.5  |               |
| 22  | Q9HRL1 Q9HRL1 | 2 | 2142.0211 | 0.0  | 130   | 149 | 0  | 65.4  | 28 | T | ASVPFHWAPEAYEGAPAPV      | S | 0.2   | 4.24 |               |
| 23  | Q9HPB1 SECY   | 1 | 870.5249  | -0.7 | 291   | 298 | 0  | 32.2  | 16 | A | SVLPMILV                 | R | 2.5   | 6.02 |               |
| 23  | Q9HPB1 SECY   | 1 | 910.5852  | 0.3  | 430   | 439 | 0  | 44.0  | 21 | T | VIGGALVGLL               | A | 2.5   | 6.02 |               |
| 23  | Q9HPB1 SECY   | 2 | 1086.4883 | 0.1  | 55    | 63  | 0  | 44.6  | 24 | A | GNDFFGQFR                | S | -0.8  | 6.78 |               |
| 23  | Q9HPB1 SECY   | 2 | 1112.5906 | 1.2  | 334   | 343 | 0  | 50.5  | 25 | T | GGLFYLLAPI               | Y | 1.2   | 5.86 |               |
| 23  | Q9HPB1 SECY   | 2 | 1282.7683 | 0.5  | 430   | 443 | 0  | 27.3  | 20 | T | VIGGALVGLLAVMA           | N | 2.5   | 6.02 |               |
| 23  | Q9HPB1 SECY   | 2 | 1309.7969 | 1.2  | 85    | 97  | 0  | 74.5  | 19 | A | SIVLQLLGGANLL            | G | 1.6   | 6.02 |               |
| 23  | Q9HPB1 SECY   | 2 | 1870.8962 | -0.3 | 55    | 72  | 0  | 71.4  | 27 | A | GNDFFGQFRSLLAGGQGT       | V | -0.2  | 6.78 |               |
| 24  | Q9HMH4 Q9HMH4 | 1 | 1172.5561 | -0.6 | 154   | 164 | 0  | 29.5  | 27 | M | VGEDENAIIDL              | A | 0.1   | 2.84 |               |
| 24  | Q9HMH4 Q9HMH4 | 1 | 1257.5037 | 1.4  | 57    | 67  | 0  | 39.0  | 20 | S | FSYDDPDADTL              | G | -0.9  | 2.74 |               |
| 24  | Q9HMH4 Q9HMH4 | 2 | 1278.6092 | 0.3  | 229   | 240 | 0  | 43.7  | 27 | A | KDGIIEGDGNYV             | D | -0.6  | 3.7  |               |
| 24  | Q9HMH4 Q9HMH4 | 1 | 1344.5358 | -0.5 | 56    | 67  | 0  | 41.2  | 20 | A | SFSYDDPDADTL             | G | -0.9  | 2.74 |               |
| 24  | Q9HMH4 Q9HMH4 | 2 | 1376.7089 | -0.6 | 276   | 287 | 0  | 38.6  | 27 | T | RLQPYSDGPFV              | E | -0.2  | 6.7  |               |
| 24  | Q9HMH4 Q9HMH4 | 2 | 1541.7362 | 0.1  | 170   | 183 | 0  | 44.5  | 27 | A | GSVLGYSPSEDRI            | A | -0.5  | 4.08 |               |
| 24  | Q9HMH4 Q9HMH4 | 2 | 1567.7114 | -1.6 | 495   | 509 | 0  | 44.1  | 26 | V | NAPTVDQLDAVHDSS          | - | -0.6  | 3.6  |               |
| 24  | Q9HMH4 Q9HMH4 | 2 | 1612.7733 | -0.2 | 169   | 183 | 0  | 81.9  | 27 | R | AGSVLGYSPSEDRI           | A | -0.3  | 4.08 |               |
| 24  | Q9HMH4 Q9HMH4 | 3 | 1882.9173 | -0.9 | 167   | 183 | 0  | 31.3  | 27 | S | NRAGSVLGYSPSEDRI         | A | -0.7  | 6.9  |               |
| 25  | O54610 O54610 | 1 | 555.3996  | 1.1  | 243   | 247 | 0  | 28.5  | 20 | V | VLLL                     | S | 4.0   | 6.02 |               |
| 25  | O54610 O54610 | 1 | 741.4272  | 0.5  | 17    | 23  | 0  | 41.1  | 24 | A | LLSPEIA                  | S | 1.1   | 3.3  |               |



| hit | accession     | z | mass      | ppm  | start | end | mc | score | id | - | sequence                        | + | gravy | pl    | modification |
|-----|---------------|---|-----------|------|-------|-----|----|-------|----|---|---------------------------------|---|-------|-------|--------------|
| 25  | O54610 O54610 | 1 | 1008.44   | -0.6 | 319   | 328 | 0  | 35.3  | 27 | A | SGGDFDAEVI                      | G | 0.1   | 2.88  |              |
| 25  | O54610 O54610 | 2 | 1243.6448 | 1.5  | 104   | 116 | 0  | 31.8  | 29 | I | AGELIGGPLAFEA                   | K | 0.8   | 3.12  |              |
| 25  | O54610 O54610 | 2 | 1389.6354 | -1.2 | 90    | 101 | 0  | 33.9  | 26 | M | SFQFGTNFPQFA                    | T | -0.1  | 6.02  |              |
| 25  | O54610 O54610 | 2 | 1457.7766 | -0.4 | 102   | 116 | 0  | 61.2  | 26 | A | TIAGELIGGPLAFEA                 | K | 1.0   | 3.12  |              |
| 25  | O54610 O54610 | 2 | 1590.789  | 0.5  | 295   | 308 | 0  | 58.6  | 28 | L | DALDPRTENLFTV                   | S | -0.4  | 3.7   |              |
| 25  | O54610 O54610 | 2 | 1790.905  | 0.1  | 293   | 308 | 0  | 37.9  | 27 | K | SLDALDPRTENLFTV                 | S | -0.2  | 3.7   |              |
| 25  | O54610 O54610 | 2 | 1950.9575 | 0.9  | 309   | 328 | 0  | 73.3  | 28 | V | SLPGIGSFLASGGDFDAEVI            | G | 0.7   | 2.88  |              |
| 26  | Q9HNV1 Q9HNV1 | 1 | 1013.4342 | 1.3  | 95    | 103 | 0  | 25.4  | 23 | Q | AIEYDFDAA                       | T | 0.1   | 2.88  |              |
| 26  | Q9HNV1 Q9HNV1 | 2 | 1268.5673 | 0.6  | 56    | 65  | 0  | 38.1  | 25 | F | SDYEEWTLRA                      | E | -1.3  | 3.82  |              |
| 26  | Q9HNV1 Q9HNV1 | 2 | 1965.8552 | -0.5 | 77    | 94  | 0  | 105.4 | 24 | I | QTFDNAGNQVDEETLTGQ              | A | -1.2  | 2.84  |              |
| 26  | Q9HNV1 Q9HNV1 | 2 | 2116.9662 | 0.2  | 137   | 156 | 0  | 82.0  | 26 | A | SFEQTQRRGGSTSQIGSAFET           | R | -0.8  | 4.26  |              |
| 26  | Q9HNV1 Q9HNV1 | 2 | 2149.9764 | -1.3 | 77    | 96  | 0  | 61.5  | 26 | I | QTFDNAGNQVDEETLTGQAI            | E | -0.8  | 2.84  |              |
| 26  | Q9HNV1 Q9HNV1 | 3 | 2735.2787 | -1.4 | 137   | 161 | 0  | 29.9  | 28 | A | SFEQTQRRGGSTSQIGSAFETRPYTT      | D | -1.0  | 7.04  |              |
| 26  | Q9HNV1 Q9HNV1 | 3 | 2855.2886 | 0.9  | 108   | 132 | 0  | 30.4  | 26 | T | RADVQIEGTTPGTETFQWSYDPEQT       | V | -1.2  | 3.5   |              |
| 26  | Q9HNV1 Q9HNV1 | 3 | 3259.5018 | -0.2 | 181   | 211 | 0  | 78.2  | 27 | A | TDAGGSVTGAERDVRDAIEFYNAGEFNQAVT | N | -0.5  | 3.76  |              |
| 27  | Q9HRL2 Q9HRL2 | 1 | 600.3635  | 0.3  | 152   | 156 | 0  | 26.7  | 21 | F | LIGIW                           | G | 2.3   | 6.02  |              |
| 27  | Q9HRL2 Q9HRL2 | 2 | 909.5072  | -0.2 | 272   | 278 | 0  | 26.5  | 23 | A | LLRFNFT                         | M | 0.6   | 11.04 |              |
| 27  | Q9HRL2 Q9HRL2 | 2 | 1051.5736 | 0.6  | 262   | 271 | 0  | 30.4  | 24 | A | GVLLKMGTYA                      | L | 0.9   | 9.72  |              |
| 27  | Q9HRL2 Q9HRL2 | 2 | 1401.7041 | 0.4  | 244   | 256 | 0  | 46.1  | 29 | T | WLPDAHVQAPTPA                   | S | -0.2  | 4.94  |              |
| 28  | Q9HS10 Q9HS10 | 1 | 1004.4662 | -0.5 | 140   | 148 | 0  | 48.3  | 27 | V | NTDLDIDS                        | T | -0.3  | 2.82  |              |
| 28  | Q9HS10 Q9HS10 | 2 | 1293.5765 | 0.5  | 187   | 197 | 0  | 43.9  | 25 | A | SGTYDYFIESI                     | L | 0.0   | 3     |              |
| 28  | Q9HS10 Q9HS10 | 2 | 1321.703  | 2.4  | 271   | 282 | 0  | 42.2  | 24 | S | GAYTPLSRPLFT                    | Y | 0.0   | 9.84  |              |
| 28  | Q9HS10 Q9HS10 | 2 | 1385.715  | 0.7  | 325   | 336 | 0  | 32.8  | 27 | A | QREQLDALTEAI                    | D | -0.6  | 3.82  |              |
| 28  | Q9HS10 Q9HS10 | 2 | 1698.7948 | 0.1  | 252   | 268 | 0  | 50.4  | 26 | L | AVDDGDGEPVKPSLETA               | R | -0.7  | 3.42  |              |
| 28  | Q9HS10 Q9HS10 | 2 | 1811.8789 | -1.4 | 251   | 268 | 0  | 78.6  | 28 | A | LAVDDGDGEPVKPSLETA              | R | -0.4  | 3.42  |              |
| 28  | Q9HS10 Q9HS10 | 2 | 2330.1754 | -0.4 | 316   | 336 | 0  | 41.5  | 28 | V | GYVPLSQEAQREQLDALTEAI           | D | -0.4  | 3.68  |              |
| 29  | Q9HHR4 Q9HHR4 | 1 | 567.3996  | -1.9 | 262   | 266 | 0  | 30.4  | 17 | L | IPLLI                           | T | 3.0   | 6.02  |              |
| 29  | Q9HHR4 Q9HHR4 | 1 | 628.416   | 0.0  | 356   | 361 | 0  | 42.4  | 25 | A | ITIALV                          | A | 3.0   | 6.02  |              |
| 29  | Q9HHR4 Q9HHR4 | 1 | 684.417   | -1.6 | 369   | 376 | 0  | 39.7  | 27 | L | GVLGGVIA                        | V | 2.2   | 6.02  |              |
| 29  | Q9HHR4 Q9HHR4 | 1 | 731.4582  | -0.3 | 553   | 559 | 0  | 36.4  | 23 | P | IFLGGLL                         | R | 2.6   | 6.02  |              |
| 29  | Q9HHR4 Q9HHR4 | 1 | 755.4541  | 1.3  | 372   | 380 | 0  | 34.1  | 25 | L | GGVIAVVAA                       | F | 2.4   | 6.02  |              |
| 29  | Q9HHR4 Q9HHR4 | 2 | 845.5123  | 1.2  | 554   | 561 | 0  | 26.2  | 19 | I | FLGGLLRA                        | G | 1.3   | 11.04 |              |
| 29  | Q9HHR4 Q9HHR4 | 2 | 887.5593  | 1.2  | 553   | 560 | 0  | 18.9  | 15 | P | IFLGGLLR                        | A | 1.7   | 11.04 |              |
| 29  | Q9HHR4 Q9HHR4 | 1 | 910.5852  | -0.1 | 632   | 641 | 0  | 23.3  | 21 | L | LGGVALVALV                      | A | 2.7   | 6.02  |              |
| 30  | Q9HMU9 Q9HMU9 | 1 | 617.3173  | 1.5  | 2     | 7   | 0  | 42.5  | 27 | M | SWAAIA                          | R | 1.4   | 6.02  |              |
| 30  | Q9HMU9 Q9HMU9 | 1 | 674.4367  | -1.0 | 140   | 145 | 0  | 24.6  | 21 | A | VFALLL                          | A | 3.4   | 6.02  |              |
| 30  | Q9HMU9 Q9HMU9 | 1 | 700.4007  | 0.3  | 49    | 54  | 0  | 41.5  | 29 | V | DLLDLL                          | S | 1.4   | 2.92  |              |
| 30  | Q9HMU9 Q9HMU9 | 2 | 716.3527  | -3.4 | 228   | 234 | 0  | 43.4  | 26 | V | MNTPAAL                         | A | 0.5   | 6.02  |              |
| 30  | Q9HMU9 Q9HMU9 | 1 | 971.5539  | 0.9  | 46    | 54  | 0  | 27.6  | 26 | T | TAVDLLDLL                       | S | 1.5   | 2.92  |              |
| 30  | Q9HMU9 Q9HMU9 | 1 | 1040.5754 | -0.5 | 49    | 58  | 0  | 60.7  | 24 | V | DLLDLLSGPV                      | N | 1.0   | 2.92  |              |

| hit | accession     | z | mass      | ppm  | start | end  | mc | score | id | - | sequence                      | + | gravy | pl   | modification  |
|-----|---------------|---|-----------|------|-------|------|----|-------|----|---|-------------------------------|---|-------|------|---------------|
| 30  | Q9HMU9 Q9HMU9 | 1 | 1069.4393 | -0.4 | 37    | 45   | 0  | 25.0  | 21 | A | GYGYFFDIT                     | T | -0.3  | 3.1  |               |
| 30  | Q9HMU9 Q9HMU9 | 2 | 1311.7286 | 0.4  | 46    | 58   | 0  | 43.9  | 24 | T | TAVDLLDLLSGPV                 | N | 1.1   | 2.92 |               |
| 31  | Q9HR04 Q9HR04 | 2 | 1239.6248 | 0.2  | 76    | 87   | 0  | 53.6  | 25 | S | IYLGEGEGGRYV                  | A | 0.0   | 6.82 |               |
| 31  | Q9HR04 Q9HR04 | 2 | 1279.6085 | -0.1 | 128   | 139  | 0  | 49.0  | 27 | A | DVFWSIDAGSLA                  | Y | 0.8   | 2.92 |               |
| 31  | Q9HR04 Q9HR04 | 2 | 1299.6459 | 0.3  | 277   | 288  | 0  | 52.0  | 27 | V | FADRPDAPLDLA                  | F | -0.2  | 3.6  |               |
| 31  | Q9HR04 Q9HR04 | 2 | 1306.638  | 0.8  | 266   | 276  | 0  | 33.9  | 28 | A | GLTNHYYPMLV                   | F | 0.2   | 7.7  |               |
| 31  | Q9HR04 Q9HR04 | 2 | 1640.6988 | 0.6  | 114   | 127  | 0  | 28.1  | 23 | A | NNIVTEYENDTMQA                | D | -1.1  | 2.94 |               |
| 31  | Q9HR04 Q9HR04 | 2 | 1950.8344 | -0.6 | 94    | 109  | 0  | 97.7  | 23 | I | NQYYDDFSATQQTQRS              | S | -1.9  | 3.88 |               |
| 32  | Q9HRT0 Q9HRT0 | 1 | 545.3247  | -4.8 | 71    | 75   | 0  | 31.7  | 26 | T | LMGLI                         | F | 2.7   | 6.02 |               |
| 32  | Q9HRT0 Q9HRT0 | 1 | 858.5215  | 0.5  | 16    | 23   | 0  | 20.7  | 20 | A | ALLVPFLS                      | R | 2.2   | 6.02 |               |
| 32  | Q9HRT0 Q9HRT0 | 2 | 1071.556  | 0.6  | 558   | 567  | 0  | 55.7  | 28 | G | RLLGDTDSPV                    | S | -0.3  | 3.88 |               |
| 33  | Q9HML5 Q9HML5 | 1 | 918.4083  | -1.2 | 248   | 256  | 0  | 29.4  | 27 | A | NVFGDPEAA                     | I | -0.2  | 3    |               |
| 33  | Q9HML5 Q9HML5 | 2 | 1240.5394 | -0.1 | 104   | 113  | 0  | 33.7  | 23 | A | NEYDTEMRLA                    | D | -1.3  | 3.82 |               |
| 33  | Q9HML5 Q9HML5 | 2 | 1303.662  | 0.3  | 193   | 204  | 0  | 67.7  | 27 | A | SREIVDSGVETI                  | T | 0.0   | 3.82 |               |
| 33  | Q9HML5 Q9HML5 | 2 | 1922.9473 | 0.1  | 60    | 78   | 0  | 35.4  | 28 | S | SQLDTSVLTDGGSSTVFPI           | T | 0.3   | 2.92 |               |
| 33  | Q9HML5 Q9HML5 | 2 | 1927.9051 | 0.4  | 287   | 304  | 0  | 33.2  | 27 | A | FVQPDGDTPLDLLEIDGT            | T | -0.5  | 2.72 |               |
| 33  | Q9HML5 Q9HML5 | 2 | 2356.0707 | 0.3  | 163   | 185  | 0  | 47.6  | 26 | S | AADELDPADSDTLDFVDHVVGV        | D | 0.0   | 3.18 |               |
| 33  | Q9HML5 Q9HML5 | 3 | 3243.6272 | -0.2 | 257   | 286  | 0  | 56.4  | 29 | A | ISPDQRYGQNQLQQAIGQADNAIGYIALA | F | -0.5  | 3.88 |               |
| 34  | Q9HN94 Q9HN94 | 2 | 1159.551  | -0.6 | 66    | 76   | 0  | 44.0  | 27 | T | SGDVTHGFELV                   | G | 0.2   | 4.06 |               |
| 34  | Q9HN94 Q9HN94 | 2 | 1280.5786 | 0.6  | 18    | 28   | 0  | 42.5  | 26 | A | DNFRDPGVYQA                   | D | -1.2  | 3.88 |               |
| 34  | Q9HN94 Q9HN94 | 1 | 1289.4936 | -0.5 | 29    | 39   | 0  | 22.7  | 17 | A | DDDSYDVYVEA                   | R | -1.0  | 2.72 |               |
| 34  | Q9HN94 Q9HN94 | 1 | 1360.5307 | -0.4 | 28    | 39   | 0  | 30.9  | 18 | Q | ADDDSYDVYVEA                  | R | -0.7  | 2.72 |               |
| 34  | Q9HN94 Q9HN94 | 2 | 1435.7096 | -0.1 | 40    | 52   | 0  | 67.2  | 27 | A | RQFAFSPGTSEPI                 | R | -0.4  | 6.98 |               |
| 34  | Q9HN94 Q9HN94 | 2 | 1755.8679 | 0.7  | 120   | 135  | 0  | 33.3  | 28 | G | SIEVVPQSEFTPPQQA              | A | -0.4  | 3.12 |               |
| 34  | Q9HN94 Q9HN94 | 2 | 2252.9135 | -0.4 | 18    | 36   | 0  | 69.8  | 18 | A | DNFRDPGVYQADDDSYDVY           | V | -1.4  | 3.22 |               |
| 34  | Q9HN94 Q9HN94 | 2 | 2541.2534 | -1.1 | 66    | 90   | 0  | 40.7  | 29 | T | SGDVTHGFELVGTNVNTMVIPGQVA     | Q | 0.4   | 4.06 |               |
| 35  | Q9HRR2 Q9HRR2 | 2 | 1107.5699 | 0.1  | 42    | 50   | 0  | 37.0  | 26 | V | DYLELLETL                     | Y | 0.3   | 2.94 |               |
| 35  | Q9HRR2 Q9HRR2 | 2 | 1127.5764 | -0.4 | 130   | 138  | 0  | 38.4  | 25 | T | DLNFGFFLR                     | S | 0.5   | 6.78 |               |
| 35  | Q9HRR2 Q9HRR2 | 2 | 1296.7078 | 1.2  | 212   | 223  | 0  | 48.0  | 26 | L | SIPLVGDWVAQL                  | M | 1.0   | 3.1  |               |
| 35  | Q9HRR2 Q9HRR2 | 2 | 1319.7224 | -0.3 | 40    | 50   | 0  | 45.9  | 25 | R | IVDYLELLETL                   | Y | 1.0   | 2.94 |               |
| 35  | Q9HRR2 Q9HRR2 | 2 | 1496.8239 | 0.6  | 210   | 223  | 0  | 56.2  | 25 | M | SLSIPLVGDWVAQL                | M | 1.0   | 3.1  |               |
| 36  | Q9HND8 VATI   | 1 | 555.3996  | 1.1  | 668   | 672  | 0  | 28.5  | 20 | V | LVLLV                         | G | 4.0   | 6.02 |               |
| 36  | Q9HND8 VATI   | 1 | 620.284   | 0.6  | 388   | 393  | 0  | 30.3  | 28 | F | MIGDLG                        | Y | 1.0   | 3.1  | Oxidation (M) |
| 36  | Q9HND8 VATI   | 1 | 700.4007  | 0.3  | 131   | 136  | 0  | 41.5  | 29 | G | IDLDLL                        | S | 1.5   | 2.92 |               |
| 36  | Q9HND8 VATI   | 2 | 1912.8691 | 0.8  | 336   | 353  | 0  | 87.2  | 26 | A | SFDETDSPPIQDNPGPV             | S | -0.8  | 2.78 |               |
| 38  | Q9HMY1 Q9HMY1 | 1 | 555.3632  | 0.4  | 306   | 310  | 0  | 19.4  | 18 | H | LPTII                         | E | 2.1   | 6.02 |               |
| 38  | Q9HMY1 Q9HMY1 | 1 | 572.3322  | 0.7  | 1281  | 1285 | 0  | 32.9  | 21 | G | WAVVV                         | T | 2.7   | 6.02 |               |
| 38  | Q9HMY1 Q9HMY1 | 1 | 656.4109  | -0.3 | 536   | 541  | 0  | 26.2  | 26 | T | LVELLA                        | E | 2.3   | 3.3  |               |
| 39  | Q9HHI2 Q9HHI2 | 1 | 569.4152  | 0.2  | 37    | 41   | 0  | 28.5  | 17 | D | IILIV                         | F | 4.3   | 6.02 |               |
| 39  | Q9HHI2 Q9HHI2 | 1 | 731.4582  | 0.7  | 41    | 47   | 0  | 24.3  | 23 | I | VFGAILL                       | M | 2.9   | 6.02 |               |

| hit | accession     | z | mass      | ppm  | start | end | mc | score | id | - | sequence             | + | gravy | pl   | modification |
|-----|---------------|---|-----------|------|-------|-----|----|-------|----|---|----------------------|---|-------|------|--------------|
| 39  | Q9HHI2 Q9HHI2 | 1 | 743.4581  | -0.1 | 206   | 212 | 0  | 22.5  | 21 | I | APFALLL              | G | 2.3   | 6.02 |              |
| 40  | Q9HQF4 Q9HQF4 | 2 | 1031.4634 | -1.9 | 208   | 215 | 0  | 26.8  | 24 | A | DKEYFMTV             | K | -0.5  | 4.08 |              |
| 40  | Q9HQF4 Q9HQF4 | 2 | 1047.5349 | 0.6  | 237   | 245 | 0  | 31.6  | 28 | R | TRNPDVFTV            | N | -0.4  | 6.78 |              |
| 40  | Q9HQF4 Q9HQF4 | 2 | 1155.5634 | 0.5  | 366   | 375 | 0  | 41.6  | 26 | S | DIFGKLM DFA          | G | 0.6   | 3.88 |              |
| 40  | Q9HQF4 Q9HQF4 | 1 | 1182.5405 | -0.5 | 102   | 113 | 0  | 27.5  | 25 | A | TEDGDPSVPGPI         | V | -0.7  | 2.88 |              |
| 40  | Q9HQF4 Q9HQF4 | 2 | 1276.6663 | 0.2  | 253   | 264 | 0  | 28.6  | 26 | R | TLHPEDGSP IIV        | E | 0.1   | 4.06 |              |
| 40  | Q9HQF4 Q9HQF4 | 2 | 1665.8111 | -0.3 | 232   | 245 | 0  | 34.2  | 27 | V | DYSPRTRNPDVFTV       | N | -1.1  | 6.84 |              |
| 40  | Q9HQF4 Q9HQF4 | 3 | 2268.0481 | -0.8 | 226   | 245 | 0  | 39.4  | 27 | S | MAGEDVDYSPRTRNPDVFTV | N | -0.7  | 3.96 |              |
| 41  | Q9HRU7 Q9HRU7 | 1 | 679.3363  | -4.7 | 400   | 406 | 0  | 28.3  | 24 | V | MGAA AFL             | I | 1.9   | 6.02 |              |
| 41  | Q9HRU7 Q9HRU7 | 1 | 684.417   | -1.6 | 33    | 40  | 0  | 28.8  | 27 | L | AVAAIGIA             | F | 2.5   | 6.02 |              |
| 42  | Q9HS86 Q9HS86 | 2 | 1488.7195 | -0.2 | 369   | 382 | 0  | 55.4  | 28 | I | DGITALIEDIAEET       | N | 0.1   | 2.8  |              |
| 42  | Q9HS86 Q9HS86 | 2 | 1589.7937 | 1.0  | 457   | 470 | 0  | 30.2  | 28 | A | EGVLRDFEAI VDEV      | A | 0.2   | 3.5  |              |
| 43  | Q9HS47 Q9HS47 | 1 | 613.3799  | -0.2 | 153   | 159 | 0  | 41.8  | 29 | I | LAAAVGI              | A | 2.5   | 6.02 |              |
| 43  | Q9HS47 Q9HS47 | 1 | 684.417   | 0.4  | 153   | 160 | 0  | 40.0  | 27 | I | LAAAVGIA             | A | 2.4   | 6.02 |              |
| 43  | Q9HS47 Q9HS47 | 1 | 755.4541  | 1.3  | 153   | 161 | 0  | 25.5  | 25 | I | LAAAVGIAA            | V | 2.3   | 6.02 |              |
| 43  | Q9HS47 Q9HS47 | 1 | 868.5382  | -0.5 | 152   | 161 | 0  | 26.5  | 23 | A | ILAAAVGIAA           | V | 2.6   | 6.02 |              |
| 44  | P33518 COX1   | 1 | 714.468   | -0.6 | 137   | 142 | 0  | 17.5  | 13 | Y | FIPLLI               | D | 3.0   | 6.02 |              |
| 44  | P33518 COX1   | 1 | 714.4713  | -3.6 | 261   | 266 | 0  | 32.7  | 13 | A | LIMLLL               | D | 3.6   | 6.02 |              |
| 44  | P33518 COX1   | 1 | 991.5742  | -0.8 | 135   | 142 | 0  | 28.4  | 21 | G | NYFIPLLI             | D | 1.6   | 5.92 |              |
| 44  | P33518 COX1   | 1 | 1003.4135 | -0.3 | 539   | 546 | 0  | 46.0  | 23 | T | DPWDLEET             | D | -1.7  | 2.84 |              |
| 44  | P33518 COX1   | 2 | 1266.7012 | 1.7  | 132   | 142 | 0  | 30.6  | 24 | A | AFGN YFIPLLI         | D | 1.6   | 5.92 |              |
| 45  | Q9HP84 HTR4   | 1 | 555.3996  | 1.1  | 44    | 48  | 0  | 28.5  | 20 | L | LVILV                | I | 4.1   | 6.02 |              |
| 46  | Q9HHP3 Q9HHP3 | 1 | 1185.519  | 0.7  | 100   | 110 | 0  | 39.8  | 24 | A | LTPDEF GGSYT         | S | -0.6  | 3    |              |
| 46  | Q9HHP3 Q9HHP3 | 2 | 1281.5514 | 0.4  | 339   | 349 | 0  | 63.3  | 24 | A | DGTQFWLGEET          | L | -1.0  | 2.94 |              |
| 46  | Q9HHP3 Q9HHP3 | 2 | 1330.7503 | 4.5  | 2     | 12  | 0  | 25.8  | 23 | M | VDSICTRRRL           | A | 0.0   | 10.8 |              |
| 46  | Q9HHP3 Q9HHP3 | 2 | 1610.8304 | -0.7 | 76    | 89  | 0  | 41.0  | 26 | S | TVLELFNLHPDSQV       | M | 0.2   | 4.06 |              |
| 47  | Q9HRL8 Q9HRL8 | 1 | 703.3938  | 0.0  | 103   | 109 | 0  | 28.0  | 27 | I | ASLGLIM              | G | 2.1   | 6.02 |              |
| 47  | Q9HRL8 Q9HRL8 | 2 | 1319.7337 | 0.7  | 146   | 157 | 0  | 34.5  | 22 | V | LFTGTLQLSEIV         | A | 1.1   | 3.3  |              |
| 47  | Q9HRL8 Q9HRL8 | 2 | 1854      | 0.3  | 25    | 42  | 0  | 110.7 | 26 | I | SVNRVGPWGLGTIVVDSV   | R | 0.7   | 6.78 |              |
| 48  | P57684 ATKA   | 1 | 515.3319  | 1.4  | 15    | 19  | 0  | 30.5  | 29 | F | TILAV                | L | 2.7   | 6.02 |              |
| 48  | P57684 ATKA   | 1 | 555.3996  | 1.1  | 556   | 560 | 0  | 28.5  | 20 | G | VIIIV                | S | 4.4   | 6.02 |              |
| 48  | P57684 ATKA   | 1 | 621.356   | -0.3 | 406   | 410 | 0  | 13.3  | 13 | I | LMFVI                | L | 3.4   | 6.02 |              |
| 48  | P57684 ATKA   | 1 | 628.416   | 1.1  | 15    | 20  | 0  | 23.4  | 23 | F | TILAVL               | V | 2.9   | 6.02 |              |
| 48  | P57684 ATKA   | 1 | 642.4105  | 0.9  | 91    | 95  | 0  | 26.1  | 13 | C | IWVLL                | F | 3.1   | 6.02 |              |
| 48  | P57684 ATKA   | 1 | 731.4582  | 0.7  | 548   | 554 | 0  | 24.3  | 23 | P | AFVGLLI              | G | 2.9   | 6.02 |              |
| 49  | Q9HR41 Q9HR41 | 1 | 755.4541  | 1.3  | 191   | 199 | 0  | 25.4  | 25 | L | AGVVGVI AA           | I | 2.4   | 6.02 |              |
| 50  | Q9HN37 Q9HN37 | 1 | 657.301   | 0.5  | 512   | 516 | 0  | 25.3  | 22 | R | YDFIT                | R | 0.4   | 3.1  |              |
| 50  | Q9HN37 Q9HN37 | 1 | 939.5753  | 1.0  | 123   | 132 | 0  | 28.4  | 22 | W | QLGGVLVIAA           | G | 2.0   | 6.02 |              |
| 50  | Q9HN37 Q9HN37 | 1 | 1010.6124 | -1.4 | 125   | 136 | 0  | 23.5  | 22 | L | GGVLVIAAGLAA         | L | 2.2   | 6.02 |              |
| 51  | O54596 O54596 | 1 | 555.3632  | 0.4  | 261   | 265 | 0  | 19.4  | 18 | A | LPTLL                | T | 1.8   | 6.02 |              |

| hit | accession     | z | mass      | ppm  | start | end | mc | score | id | - | sequence                 | + | gravy | pl    | modification |
|-----|---------------|---|-----------|------|-------|-----|----|-------|----|---|--------------------------|---|-------|-------|--------------|
| 51  | O54596 O54596 | 1 | 626.4003  | 1.0  | 223   | 228 | 0  | 28.3  | 21 | A | VLSLPV                   | A | 2.3   | 6.02  |              |
| 51  | O54596 O54596 | 1 | 757.4738  | -1.2 | 302   | 308 | 0  | 23.0  | 22 | L | GFPVLLL                  | V | 2.3   | 6.02  |              |
| 51  | O54596 O54596 | 1 | 771.4895  | -1.0 | 136   | 142 | 0  | 22.1  | 20 | S | VFAPLLL                  | G | 2.7   | 6.02  |              |
| 51  | O54596 O54596 | 2 | 981.6474  | 1.2  | 261   | 269 | 0  | 23.2  | 13 | A | LPTLLTLLV                | A | 2.2   | 6.02  |              |
| 51  | O54596 O54596 | 2 | 1218.7013 | 0.7  | 131   | 142 | 0  | 22.3  | 22 | A | FVGGSVFAPLLL             | G | 2.0   | 6.02  |              |
| 52  | Q9HN25 Q9HN25 | 1 | 610.3326  | 0.3  | 96    | 101 | 0  | 28.7  | 23 | V | LGPDPV                   | S | 0.1   | 3.1   |              |
| 52  | Q9HN25 Q9HN25 | 1 | 1085.5241 | -0.1 | 96    | 106 | 0  | 39.1  | 26 | V | LGPDPVLSADTT             | V | -0.3  | 2.92  |              |
| 52  | Q9HN25 Q9HN25 | 1 | 1125.5342 | -1.2 | 132   | 141 | 0  | 35.9  | 26 | A | NFIEPGSLSY               | V | -0.1  | 3.3   |              |
| 52  | Q9HN25 Q9HN25 | 1 | 1283.6609 | 0.3  | 96    | 108 | 0  | 46.4  | 26 | V | LGPDPVLSADTTVV           | V | 0.4   | 2.92  |              |
| 52  | Q9HN25 Q9HN25 | 2 | 1657.81   | 0.5  | 132   | 145 | 0  | 66.5  | 28 | A | NFIEPGSLSYVYRN           | M | -0.4  | 6.82  |              |
| 53  | P25964 BACS1  | 1 | 788.4221  | 0.0  | 177   | 183 | 0  | 43.6  | 24 | L | VWLFPGA                  | G | 1.4   | 6.02  |              |
| 53  | P25964 BACS1  | 1 | 905.595   | -0.9 | 38    | 46  | 0  | 47.0  | 13 | A | LAPLAIIPV                | F | 2.4   | 6.02  |              |
| 53  | P25964 BACS1  | 1 | 976.6321  | 0.7  | 37    | 46  | 0  | 21.9  | 13 | S | ALAPLAIIPV               | F | 2.3   | 6.02  |              |
| 53  | P25964 BACS1  | 1 | 1123.7005 | -1.0 | 38    | 48  | 0  | 28.4  | 20 | A | LAPLAIIPVFA              | G | 2.3   | 6.02  |              |
| 53  | P25964 BACS1  | 2 | 1316.6765 | -0.1 | 177   | 189 | 0  | 42.8  | 27 | L | VWLFPGPAGIGEAT           | A | 0.8   | 3.3   |              |
| 55  | O52005 O52005 | 1 | 555.3996  | 1.1  | 162   | 166 | 0  | 28.5  | 20 | G | VLIIV                    | M | 4.2   | 6.02  |              |
| 55  | O52005 O52005 | 2 | 1005.5648 | 0.6  | 35    | 44  | 0  | 29.0  | 23 | I | KFGVAGPLFA               | G | 1.1   | 10.1  |              |
| 56  | Q9HS26 Q9HS26 | 1 | 555.3996  | 1.1  | 357   | 361 | 0  | 28.5  | 20 | L | VLLIV                    | A | 4.1   | 6.02  |              |
| 56  | Q9HS26 Q9HS26 | 1 | 973.5484  | -1.0 | 320   | 328 | 0  | 34.5  | 25 | L | SVLPFVEAI                | N | 1.7   | 3.3   |              |
| 57  | Q9HRR1 Q9HRR1 | 1 | 567.3996  | -1.9 | 187   | 191 | 0  | 30.4  | 17 | T | IPILI                    | I | 3.1   | 6.02  |              |
| 57  | Q9HRR1 Q9HRR1 | 1 | 626.4479  | 0.3  | 189   | 193 | 0  | 14.5  | 13 | P | ILIIR                    | S | 2.6   | 11.04 |              |
| 57  | Q9HRR1 Q9HRR1 | 1 | 668.4473  | -1.6 | 186   | 191 | 0  | 27.5  | 14 | N | TIPILI                   | I | 2.5   | 6.02  |              |
| 57  | Q9HRR1 Q9HRR1 | 3 | 1745.8472 | -0.2 | 73    | 88  | 0  | 29.2  | 28 | I | DDNGDIKGVFPDVKEV         | E | -0.7  | 3.76  |              |
| 57  | Q9HRR1 Q9HRR1 | 2 | 2719.1198 | -1.4 | 151   | 174 | 0  | 100.2 | 18 | V | NIDEFDDYDTWENDYGDAGIGKPA | K | -1.3  | 3.16  |              |
| 58  | Q9HN17 Q9HN17 | 1 | 643.3541  | 0.6  | 295   | 300 | 0  | 41.3  | 31 | E | VIQDGL                   | L | 0.9   | 3.1   |              |
| 58  | Q9HN17 Q9HN17 | 1 | 656.4109  | -0.3 | 300   | 305 | 0  | 43.9  | 26 | G | LLDLLA                   | D | 2.3   | 3.1   |              |
| 60  | Q9HR23 Q9HR23 | 1 | 600.3635  | -0.3 | 138   | 142 | 0  | 22.8  | 21 | V | WLVAL                    | G | 2.5   | 6.02  |              |
| 60  | Q9HR23 Q9HR23 | 1 | 634.369   | 1.6  | 281   | 286 | 0  | 27.2  | 27 | G | FIAIAT                   | Y | 2.5   | 6.02  |              |
| 60  | Q9HR23 Q9HR23 | 1 | 769.4949  | -0.9 | 75    | 81  | 0  | 28.9  | 21 | G | LEGLLI                   | S | 2.4   | 3.3   |              |
| 61  | Q9HNG4 Q9HNG4 | 1 | 690.4316  | 1.2  | 368   | 373 | 0  | 21.2  | 21 | F | FLSLLV                   | V | 2.9   | 6.02  |              |
| 62  | O54523 O54523 | 1 | 681.4425  | 0.9  | 81    | 87  | 0  | 26.0  | 22 | L | PIAGVIL                  | V | 2.4   | 6.02  |              |
| 62  | O54523 O54523 | 1 | 726.464   | -1.5 | 326   | 332 | 0  | 27.7  | 25 | L | IAQLAVL                  | L | 2.3   | 6.02  |              |
| 62  | O54523 O54523 | 2 | 763.4116  | 0.4  | 100   | 106 | 0  | 29.3  | 26 | G | ITTGYP                   | A | 0.6   | 5.92  |              |
| 62  | O54523 O54523 | 1 | 774.431   | -1.2 | 94    | 101 | 0  | 27.5  | 26 | A | GLMAIGIT                 | T | 1.9   | 6.02  |              |
| 63  | Q9HS95 Q9HS95 | 1 | 543.3268  | -0.7 | 41    | 45  | 0  | 32.6  | 30 | I | IDAIL                    | F | 2.2   | 3.1   |              |
| 64  | Q9HML7 Q9HML7 | 1 | 582.3741  | 0.5  | 49    | 54  | 0  | 25.3  | 25 | A | VVGIPV                   | A | 2.5   | 6.02  |              |
| 64  | Q9HML7 Q9HML7 | 1 | 782.4902  | 0.6  | 51    | 58  | 0  | 23.3  | 22 | V | GIPVATLL                 | G | 1.9   | 6.02  |              |
| 65  | Q9HRR3 Q9HRR3 | 1 | 641.3207  | 0.0  | 221   | 227 | 0  | 21.8  | 16 | I | PPMAGAV                  | A | 0.9   | 6.02  |              |
| 65  | Q9HRR3 Q9HRR3 | 1 | 690.3952  | 1.2  | 215   | 220 | 0  | 23.5  | 23 | F | DLAFLI                   | P | 2.2   | 3.1   |              |
| 65  | Q9HRR3 Q9HRR3 | 1 | 844.4517  | 0.8  | 218   | 225 | 0  | 31.2  | 29 | A | FLIPPMAG                 | A | 1.4   | 6.02  |              |

| hit | accession     | z | mass      | ppm  | start | end | mc | score | id | - | sequence                    | + | gravy | pl   | modification  |
|-----|---------------|---|-----------|------|-------|-----|----|-------|----|---|-----------------------------|---|-------|------|---------------|
| 65  | Q9HRR3 Q9HRR3 | 1 | 1014.5572 | -0.1 | 218   | 227 | 0  | 33.2  | 27 | A | FLIPPMAGAV                  | A | 1.7   | 6.02 |               |
| 65  | Q9HRR3 Q9HRR3 | 2 | 1274.7387 | -1.3 | 161   | 172 | 0  | 53.9  | 21 | V | GFIAIVPFLNKG                | S | 1.2   | 10.1 |               |
| 67  | Q9HQY4 Q9HQY4 | 1 | 545.3247  | -4.8 | 76    | 80  | 0  | 33.3  | 26 | P | MLGLL                       | A | 2.6   | 6.02 |               |
| 67  | Q9HQY4 Q9HQY4 | 1 | 555.3632  | 0.4  | 336   | 340 | 0  | 27.1  | 18 | T | TPLLI                       | P | 2.0   | 6.02 |               |
| 67  | Q9HQY4 Q9HQY4 | 2 | 1062.542  | -2.0 | 329   | 338 | 0  | 36.6  | 26 | P | MYAAVPTTPL                  | L | 0.8   | 5.92 |               |
| 68  | P57699 ATKB   | 1 | 755.4793  | -0.8 | 265   | 271 | 0  | 30.0  | 23 | A | ELVALLV                     | A | 2.6   | 3.3  |               |
| 69  | Q9HP66 Q9HP66 | 1 | 515.3319  | 1.4  | 254   | 258 | 0  | 30.5  | 29 | A | TIIAV                       | L | 2.9   | 6.02 |               |
| 69  | Q9HP66 Q9HP66 | 1 | 628.416   | 1.1  | 254   | 259 | 0  | 23.4  | 23 | A | TIIAVL                      | S | 3.0   | 6.02 |               |
| 70  | Q9HNT5 Q9HNT5 | 1 | 543.3268  | 0.2  | 814   | 818 | 0  | 31.8  | 29 | N | EAVLL                       | L | 2.0   | 3.3  |               |
| 71  | P71414 P71414 | 2 | 803.4905  | 2.9  | 12    | 18  | 0  | 13.5  | 13 | A | AKFNVLL                     | L | 1.3   | 10.1 |               |
| 72  | Q9HSL5 Q9HSL5 | 2 | 1229.6445 | 1.2  | 257   | 267 | 0  | 33.5  | 28 | V | SWLPFVSVQPA                 | T | 0.7   | 6.02 |               |
| 73  | Q9HNR0 Q9HNR0 | 2 | 1959.9385 | -0.2 | 152   | 172 | 0  | 63.7  | 29 | I | DATGLGGAEVKDIETSAGAQA       | H | -0.2  | 3.58 |               |
| 74  | Q9HPQ1 Q9HPQ1 | 1 | 685.4374  | -0.9 | 147   | 153 | 0  | 26.3  | 26 | L | AITGLIV                     | V | 2.5   | 6.02 |               |
| 75  | Q9HPT7 Q9HPT7 | 1 | 569.4152  | 0.2  | 28    | 32  | 0  | 28.5  | 17 | G | LLILV                       | A | 4.0   | 6.02 |               |
| 75  | Q9HPT7 Q9HPT7 | 1 | 771.4895  | -1.0 | 245   | 251 | 0  | 22.1  | 20 | S | AVFPILI                     | G | 2.9   | 6.02 |               |
| 76  | Q9HRS9 Q9HRS9 | 1 | 676.416   | 1.3  | 469   | 474 | 0  | 23.0  | 22 | A | VFLSLV                      | R | 3.0   | 6.02 |               |
| 76  | Q9HRS9 Q9HRS9 | 1 | 924.5321  | -1.3 | 360   | 367 | 0  | 32.3  | 23 | K | YFLLIGTV                    | T | 2.1   | 5.92 |               |
| 76  | Q9HRS9 Q9HRS9 | 1 | 976.523   | -0.4 | 16    | 25  | 0  | 26.6  | 26 | L | STFVPGVSLA                  | L | 1.3   | 6.02 |               |
| 76  | Q9HRS9 Q9HRS9 | 1 | 1118.6223 | 0.0  | 216   | 225 | 0  | 38.0  | 23 | V | LLDVYGIDLV                  | A | 1.6   | 2.92 |               |
| 77  | Q9HNB9 Q9HNB9 | 1 | 730.3749  | 0.1  | 209   | 214 | 0  | 40.2  | 27 | G | IEDLEL                      | S | 0.3   | 2.94 |               |
| 77  | Q9HNB9 Q9HNB9 | 1 | 1003.4975 | 0.0  | 108   | 117 | 0  | 64.3  | 29 | A | AFDVQVPAGT                  | A | 0.5   | 3.1  |               |
| 77  | Q9HNB9 Q9HNB9 | 2 | 1254.6456 | -1.7 | 110   | 122 | 0  | 28.1  | 26 | F | DVQVPAGTAVGEL               | E | 0.5   | 3    |               |
| 77  | Q9HNB9 Q9HNB9 | 3 | 2627.2787 | -2.4 | 71    | 97  | 0  | 53.4  | 29 | A | RLSGPSEERVDGAEVAGQTGADGLSVA | L | -0.3  | 3.92 |               |
| 79  | Q9HSJ6 Q9HSJ6 | 2 | 1199.6622 | -3.9 | 224   | 234 | 0  | 27.5  | 26 | V | ERLAADRTGVL                 | K | -0.2  | 7.04 |               |
| 80  | Q9HSM2 MUTS1  | 1 | 643.3541  | 0.6  | 574   | 580 | 0  | 39.6  | 31 | E | LVAGDGL                     | D | 1.3   | 3.1  |               |
| 81  | Q9HP01 Q9HP01 | 1 | 668.4473  | 0.9  | 214   | 219 | 0  | 22.3  | 14 | V | LLPLTL                      | P | 2.2   | 6.02 |               |
| 82  | P82857 P82857 | 1 | 543.3268  | 0.2  | 389   | 393 | 0  | 31.8  | 29 | T | EAVIL                       | E | 2.2   | 3.3  |               |
| 82  | P82857 P82857 | 1 | 613.3799  | -0.2 | 14    | 20  | 0  | 41.8  | 29 | A | ALAAVGL                     | A | 2.4   | 6.02 |               |
| 82  | P82857 P82857 | 1 | 684.417   | 0.4  | 14    | 21  | 0  | 40.0  | 27 | A | ALAAVGLA                    | G | 2.3   | 6.02 |               |
| 83  | Q9HME2 Q9HME2 | 1 | 1124.6077 | -1.0 | 49    | 60  | 0  | 25.9  | 25 | V | GGLISPLVPDSA                | T | 0.8   | 3.1  |               |
| 83  | Q9HME2 Q9HME2 | 2 | 1301.7054 | 1.3  | 2     | 12  | 0  | 70.0  | 26 | M | VWIIDNLVTMV                 | E | 1.7   | 3.1  |               |
| 83  | Q9HME2 Q9HME2 | 2 | 1317.7003 | 0.6  | 2     | 12  | 0  | 48.5  | 26 | M | VWIIDNLVTMV                 | E | 1.7   | 3.1  | Oxidation (M) |
| 83  | Q9HME2 Q9HME2 | 2 | 1810.9829 | 0.6  | 41    | 60  | 0  | 35.8  | 25 | A | GAFGALAVGGLISPLVPDSA        | T | 1.2   | 3.1  |               |
| 83  | Q9HME2 Q9HME2 | 2 | 1953.0571 | 0.9  | 39    | 60  | 0  | 35.2  | 26 | A | AAGAFGALAVGGLISPLVPDSA      | T | 1.3   | 3.1  |               |
| 84  | Q9HNY2 Q9HNY2 | 1 | 543.3268  | -0.7 | 227   | 231 | 0  | 32.6  | 30 | T | DLALI                       | T | 2.1   | 3.1  |               |
| 84  | Q9HNY2 Q9HNY2 | 1 | 678.3952  | -0.9 | 85    | 90  | 0  | 23.1  | 22 | T | AYLTVL                      | Q | 1.9   | 5.92 |               |
| 84  | Q9HNY2 Q9HNY2 | 1 | 683.4218  | 0.6  | 147   | 153 | 0  | 24.5  | 24 | A | LLSAPIA                     | V | 1.9   | 6.02 |               |
| 85  | Q9HNR2 Q9HNR2 | 1 | 612.3847  | 1.0  | 408   | 413 | 0  | 30.2  | 24 | S | IVTPIA                      | V | 2.1   | 6.02 |               |
| 85  | Q9HNR2 Q9HNR2 | 2 | 763.4116  | 0.4  | 303   | 309 | 0  | 35.7  | 26 | A | DYAVALI                     | V | 1.6   | 3.1  |               |
| 87  | Q9HNF6 Q9HNF6 | 1 | 626.4003  | -0.2 | 556   | 561 | 0  | 35.0  | 22 | Y | LSLVPV                      | A | 2.3   | 6.02 |               |

| hit | accession       | z | mass      | ppm  | start | end | mc | score | id | - | sequence             | + | gravy | pl   | modification |
|-----|-----------------|---|-----------|------|-------|-----|----|-------|----|---|----------------------|---|-------|------|--------------|
| 87  | Q9HNF6 Q9HNF6   | 1 | 681.4425  | 0.9  | 268   | 274 | 0  | 26.0  | 22 | F | GPIAVLL              | A | 2.3   | 6.02 |              |
| 88  | Q9HRQ9 Q9HRQ9   | 2 | 1017.4767 | 0.5  | 123   | 131 | 0  | 54.0  | 28 | A | GWDAQTEIV            | S | -0.2  | 3    |              |
| 88  | Q9HRQ9 Q9HRQ9   | 2 | 1615.7366 | 1.1  | 117   | 131 | 0  | 48.2  | 26 | T | SVPDEAGWDAQTEIV      | S | -0.4  | 2.84 |              |
| 88  | Q9HRQ9 Q9HRQ9   | 2 | 1626.8002 | -1.5 | 79    | 93  | 0  | 42.3  | 27 | V | KVGPNNQNVFDPAEV      | Y | -0.8  | 4.08 |              |
| 88  | Q9HRQ9 Q9HRQ9   | 2 | 1674.8148 | -0.3 | 175   | 191 | 0  | 45.5  | 29 | S | GGGGPVERSPHEMGVPI    | Q | -0.4  | 5.3  |              |
| 88  | Q9HRQ9 Q9HRQ9   | 2 | 1725.8686 | -0.7 | 78    | 93  | 0  | 38.2  | 27 | T | VKVGPNQNVFDPAEV      | Y | -0.4  | 4.08 |              |
| 89  | Q9HNN6 Q9HNN6   | 1 | 666.3588  | 1.2  | 455   | 460 | 0  | 22.4  | 21 | S | AYLSTL               | F | 1.1   | 5.92 |              |
| 89  | Q9HNN6 Q9HNN6   | 1 | 703.3938  | -0.1 | 579   | 585 | 0  | 28.0  | 27 | T | TGIGLLM              | L | 1.8   | 6.02 |              |
| 89  | Q9HNN6 Q9HNN6   | 2 | 1508.8603 | 0.6  | 103   | 116 | 0  | 41.4  | 23 | S | NVLVIPGVNDFLPL       | S | 1.2   | 3.1  |              |
| 91  | Q9HMS7 Q9HMS7   | 1 | 545.3247  | -4.8 | 135   | 139 | 0  | 33.3  | 26 | S | MIGLL                | N | 2.7   | 6.02 |              |
| 91  | Q9HMS7 Q9HMS7   | 1 | 617.3173  | 1.5  | 217   | 222 | 0  | 32.9  | 27 | A | WGTAIA               | N | 1.0   | 6.02 |              |
| 91  | Q9HMS7 Q9HMS7   | 1 | 734.4367  | 3.7  | 278   | 283 | 0  | 17.5  | 14 | F | PFLFVL               | G | 2.6   | 6.02 |              |
| 92  | Q9HMK5 Q9HMK5   | 1 | 543.3268  | 1.5  | 135   | 139 | 0  | 30.1  | 29 | N | DLLLA                | G | 1.9   | 3.1  |              |
| 93  | Q9HN93 Q9HN93   | 1 | 766.4629  | -4.4 | 263   | 268 | 0  | 20.0  | 20 | V | YFLILV               | G | 3.0   | 5.92 |              |
| 93  | Q9HN93 Q9HN93   | 2 | 1239.5156 | -0.4 | 118   | 128 | 0  | 26.0  | 21 | A | DWGGHDPIENT          | G | -1.5  | 3.7  |              |
| 93  | Q9HN93 Q9HN93   | 2 | 1832.7741 | -1.1 | 239   | 254 | 0  | 27.1  | 21 | D | AFEPDTELGHDEYDPV     | G | -1.1  | 3.38 |              |
| 93  | Q9HN93 Q9HN93   | 2 | 1947.801  | 0.4  | 238   | 254 | 0  | 50.3  | 19 | A | DAFEPDTELGHDEYDPV    | G | -1.2  | 3.28 |              |
| 93  | Q9HN93 Q9HN93   | 2 | 2213.0389 | -0.5 | 98    | 117 | 0  | 63.1  | 28 | V | SFEWVSNTHNILIDAQPDGA | D | -0.3  | 3.7  |              |
| 94  | Q9HR54 Q9HR54   | 1 | 678.3952  | -0.9 | 543   | 548 | 0  | 23.1  | 22 | Q | FSLTVL               | R | 2.2   | 6.02 |              |
| 95  | Q9HMMW2 Q9HMMW2 | 1 | 628.416   | 0.0  | 71    | 76  | 0  | 42.4  | 25 | G | TLIAIV               | F | 3.0   | 6.02 |              |
| 95  | Q9HMMW2 Q9HMMW2 | 1 | 664.3796  | -2.0 | 36    | 41  | 0  | 39.4  | 24 | L | SYLGLI               | V | 1.6   | 5.92 |              |
| 95  | Q9HMMW2 Q9HMMW2 | 1 | 714.4713  | -3.9 | 229   | 234 | 0  | 26.4  | 13 | F | MLLLLL               | T | 3.5   | 6.02 |              |
| 96  | Q9HRS0 Q9HRS0   | 2 | 1475.6067 | -0.9 | 219   | 230 | 0  | 68.6  | 21 | A | YFFMKYGGDYGE         | - | -0.7  | 4.08 |              |
| 97  | Q9HNB6 Q9HNB6   | 1 | 690.4316  | 1.2  | 18    | 23  | 0  | 21.2  | 21 | D | VTFLLV               | L | 3.0   | 6.02 |              |
| 97  | Q9HNB6 Q9HNB6   | 2 | 1162.5652 | -0.2 | 295   | 305 | 0  | 61.7  | 28 | V | GMVTLDDARSV          | R | 0.2   | 3.88 |              |
| 98  | Q9HN36 Q9HN36   | 1 | 731.4581  | -0.8 | 259   | 264 | 0  | 36.5  | 23 | T | FNLLLL               | V | 2.4   | 6.02 |              |
| 98  | Q9HN36 Q9HN36   | 1 | 830.5266  | -0.4 | 259   | 265 | 0  | 23.3  | 21 | T | FNLLLLV              | M | 2.7   | 6.02 |              |
| 99  | Q9HMI2 Q9HMI2   | 1 | 883.5379  | -0.8 | 329   | 336 | 0  | 27.2  | 23 | T | LVNLLVDV             | T | 2.1   | 3.1  |              |
| 100 | Q9HT01 Q9HT01   | 2 | 834.4276  | 0.5  | 192   | 198 | 0  | 27.6  | 24 | H | VTAWYPV              | V | 0.8   | 5.92 |              |
| 101 | Q9HQ54 Q9HQ54   | 1 | 600.3483  | 1.8  | 68    | 73  | 0  | 38.0  | 30 | A | TLTVAP               | G | 1.1   | 6.02 |              |
| 102 | O51965 O51965   | 2 | 1216.5611 | 0.9  | 322   | 331 | 0  | 48.0  | 26 | A | EQLEEAWAEI           | Q | -0.7  | 2.96 |              |
| 103 | Q9HNQ2 IF2P     | 1 | 543.3268  | -0.7 | 103   | 107 | 0  | 32.6  | 30 | A | DIAIL                | V | 2.2   | 3.1  |              |
| 103 | Q9HNQ2 IF2P     | 1 | 642.3952  | -0.5 | 103   | 108 | 0  | 44.7  | 27 | A | DIAILV               | V | 2.6   | 3.1  |              |
| 104 | Q9HNQ5 Q9HNQ5   | 1 | 684.417   | -1.6 | 17    | 24  | 0  | 39.7  | 27 | F | VVAGVGLA             | A | 2.4   | 6.02 |              |
| 104 | Q9HNQ5 Q9HNQ5   | 1 | 755.4541  | 1.3  | 17    | 25  | 0  | 25.5  | 25 | F | VVAGVGLAA            | T | 2.3   | 6.02 |              |
| 105 | Q9HSW6 CDC61    | 1 | 515.3319  | 1.4  | 305   | 309 | 0  | 30.5  | 29 | L | TLLAV                | V | 2.6   | 6.02 |              |
| 105 | Q9HSW6 CDC61    | 1 | 545.3247  | -4.8 | 357   | 361 | 0  | 33.3  | 26 | H | MLGIL                | S | 2.7   | 6.02 |              |
| 106 | Q9HP81 HTR2     | 1 | 628.416   | 0.0  | 17    | 22  | 0  | 42.4  | 25 | K | LTLALV               | V | 2.8   | 6.02 |              |
| 107 | Q9HNV6 HELS     | 2 | 763.4116  | 0.1  | 399   | 405 | 0  | 31.7  | 26 | P | YGEAVLL              | A | 1.2   | 3.3  |              |
| 108 | Q9HR16 Q9HR16   | 2 | 1089.5495 | 0.8  | 179   | 188 | 0  | 41.5  | 29 | A | TWGLPFADLA           | A | 0.7   | 3.1  |              |

| hit | accession     | z | mass      | ppm  | start | end | mc | score | id | - | sequence                    | + | gravy | pl    | modification  |
|-----|---------------|---|-----------|------|-------|-----|----|-------|----|---|-----------------------------|---|-------|-------|---------------|
| 110 | Q9HS12 Q9HS12 | 1 | 567.3996  | -1.9 | 430   | 434 | 0  | 30.4  | 17 | I | LPIII                       | I | 3.1   | 6.02  |               |
| 111 | Q9HQT5 Q9HQT5 | 1 | 727.448   | -0.1 | 73    | 79  | 0  | 27.4  | 25 | G | DLLALLA                     | A | 2.2   | 3.1   |               |
| 111 | Q9HQT5 Q9HQT5 | 1 | 834.4487  | 0.8  | 70    | 77  | 0  | 33.1  | 26 | A | AYGDLLAL                    | L | 1.2   | 3.1   |               |
| 113 | Q9HPN8 Q9HPN8 | 1 | 684.417   | 0.7  | 30    | 37  | 0  | 28.5  | 27 | N | AALGLAVA                    | I | 2.3   | 6.02  |               |
| 114 | Q9HHP2 Q9HHP2 | 2 | 762.4024  | 1.8  | 502   | 508 | 0  | 27.7  | 27 | P | ARLFADA                     | P | 0.6   | 6.78  |               |
| 115 | Q9HR05 Q9HR05 | 1 | 681.4425  | 0.7  | 512   | 518 | 0  | 28.6  | 22 | A | AVPALVL                     | V | 2.6   | 6.02  |               |
| 118 | Q9HHE7 Q9HHE7 | 2 | 1291.5528 | 1.3  | 73    | 86  | 0  | 62.2  | 24 | A | GADVSENGDGTATV              | T | -0.4  | 2.88  |               |
| 118 | Q9HHE7 Q9HHE7 | 2 | 1420.6722 | 0.7  | 87    | 99  | 0  | 35.8  | 27 | V | TWISEGTASELEV               | S | 0.0   | 3.02  |               |
| 118 | Q9HHE7 Q9HHE7 | 2 | 1490.6485 | 0.7  | 71    | 86  | 0  | 28.4  | 24 | V | QAGADVSENGDGTATV            | T | -0.4  | 2.88  |               |
| 118 | Q9HHE7 Q9HHE7 | 2 | 2358.9572 | 0.2  | 120   | 140 | 0  | 39.3  | 18 | I | QYNSDTDSNKKIDDDNTITA        | T | -1.7  | 3.14  |               |
| 119 | Q9HR13 Q9HR13 | 1 | 637.3475  | 4.2  | 455   | 459 | 0  | 25.2  | 18 | Q | YPFVL                       | V | 1.6   | 5.92  |               |
| 121 | O54662 O54662 | 1 | 505.29    | -1.8 | 11    | 15  | 0  | 32.2  | 30 | A | GFGLL                       | I | 1.9   | 6.02  |               |
| 121 | O54662 O54662 | 1 | 612.3847  | 1.0  | 30    | 35  | 0  | 32.9  | 24 | F | LVTPAL                      | L | 1.9   | 6.02  |               |
| 121 | O54662 O54662 | 1 | 782.4902  | -0.4 | 225   | 232 | 0  | 25.8  | 22 | V | AIPVVATL                    | L | 2.3   | 6.02  |               |
| 122 | Q9HRN3 Q9HRN3 | 2 | 1649.8009 | 0.1  | 84    | 100 | 0  | 81.1  | 28 | V | SSPGGAVSGSEVQYRAV           | K | -0.2  | 6.88  |               |
| 122 | Q9HRN3 Q9HRN3 | 2 | 1744.8843 | -0.2 | 50    | 67  | 0  | 34.4  | 28 | V | NIESAITGGTDAVAKEL           | R | 0.1   | 3.82  |               |
| 123 | Q9HS59 Q9HS59 | 1 | 555.3996  | 1.1  | 163   | 167 | 0  | 28.5  | 20 | G | IVLLV                       | F | 4.1   | 6.02  |               |
| 123 | Q9HS59 Q9HS59 | 1 | 626.4003  | -0.2 | 156   | 161 | 0  | 35.0  | 22 | Q | TVLVVPV                     | G | 2.4   | 6.02  |               |
| 123 | Q9HS59 Q9HS59 | 2 | 1372.6544 | 4.4  | 42    | 54  | 0  | 35.4  | 27 | D | PEDASVNCLLEAL               | R | 0.4   | 2.94  |               |
| 124 | Q9HMG7 Q9HMG7 | 1 | 626.4479  | 0.3  | 361   | 365 | 0  | 14.5  | 13 | F | LLLLR                       | R | 2.1   | 11.04 |               |
| 124 | Q9HMG7 Q9HMG7 | 1 | 684.417   | 0.7  | 18    | 25  | 0  | 28.5  | 27 | G | ALAGIAVA                    | S | 2.4   | 6.02  |               |
| 125 | Q9HNH6 Q9HNH6 | 1 | 612.3847  | -0.8 | 382   | 387 | 0  | 27.3  | 24 | E | TIVPAL                      | C | 2.0   | 6.02  |               |
| 126 | Q9HSV6 Q9HSV6 | 1 | 668.4473  | -1.6 | 91    | 96  | 0  | 27.5  | 14 | F | ITPLLI                      | F | 2.4   | 6.02  |               |
| 127 | Q9HP49 Q9HP49 | 2 | 1029.607  | 1.4  | 200   | 208 | 0  | 36.7  | 22 | A | NTKLLVETL                   | A | 0.4   | 6.94  |               |
| 127 | Q9HP49 Q9HP49 | 3 | 2466.2153 | -0.3 | 119   | 139 | 0  | 58.1  | 28 | R | TPSTWQAQQSQPRQPFRQPA        | Q | -1.8  | 12.4  |               |
| 127 | Q9HP49 Q9HP49 | 3 | 2986.5155 | -1.2 | 28    | 54  | 0  | 44.4  | 29 | A | QSGTVRQQQPAQQSIAQQQPMARPQPV | A | -1.2  | 12.4  |               |
| 128 | Q9HRF2 Q9HRF2 | 1 | 621.356   | 0.8  | 70    | 74  | 0  | 18.0  | 13 | P | MVFLI                       | I | 3.3   | 6.02  |               |
| 128 | Q9HRF2 Q9HRF2 | 2 | 734.4401  | 1.9  | 70    | 75  | 0  | 26.4  | 18 | P | MVFLLI                      | S | 3.5   | 6.02  |               |
| 128 | Q9HRF2 Q9HRF2 | 1 | 750.435   | -2.3 | 70    | 75  | 0  | 20.2  | 14 | P | MVFLLI                      | S | 3.5   | 6.02  | Oxidation (M) |
| 128 | Q9HRF2 Q9HRF2 | 2 | 941.595   | 1.2  | 309   | 317 | 0  | 19.2  | 16 | S | VVFLPAIAI                   | A | 2.9   | 6.02  |               |
| 129 | Q9HR62 Q9HR62 | 1 | 642.4105  | 0.9  | 222   | 226 | 0  | 26.1  | 13 | V | WLVL                        | A | 2.9   | 6.02  |               |
| 130 | Q9HRT4 Q9HRT4 | 1 | 797.5011  | -0.6 | 389   | 397 | 0  | 32.6  | 24 | G | VAALAVALA                   | D | 2.8   | 6.02  |               |
| 131 | Q9HQ23 Q9HQ23 | 1 | 755.4541  | 1.3  | 20    | 27  | 0  | 27.8  | 25 | V | VVQVGALA                    | L | 2.0   | 6.02  |               |
| 133 | Q9HNS6 Q9HNS6 | 2 | 1122.5094 | 0.8  | 209   | 218 | 0  | 27.2  | 25 | S | GGFWESVDRA                  | M | -0.5  | 4.08  |               |
| 135 | Q9HP32 PYRG   | 1 | 765.4636  | -1.0 | 421   | 427 | 0  | 23.6  | 16 | Y | PVIDLLP                     | E | 1.4   | 3.1   |               |
| 135 | Q9HP32 PYRG   | 1 | 1035.5601 | 2.4  | 117   | 125 | 0  | 24.1  | 24 | G | DYLGKTVQI                   | I | -0.1  | 6.68  |               |
| 136 | Q9HS71 Q9HS71 | 1 | 628.416   | 0.0  | 167   | 172 | 0  | 42.4  | 25 | A | LTIAIV                      | T | 3.0   | 6.02  |               |
| 137 | Q9HNS6 Q9HNS6 | 1 | 674.4367  | -1.0 | 19    | 24  | 0  | 24.6  | 21 | P | FAVLLL                      | T | 3.4   | 6.02  |               |
| 137 | Q9HNS6 Q9HNS6 | 1 | 771.4895  | -1.0 | 18    | 24  | 0  | 23.2  | 20 | E | PFAVLLL                     | T | 2.7   | 6.02  |               |
| 139 | Q9HSQ7 Q9HSQ7 | 2 | 1329.7333 | 0.2  | 75    | 86  | 0  | 38.0  | 24 | A | FLPFLPQSVVPS                | S | 1.0   | 6.02  |               |

| hit | accession     | z | mass      | ppm  | start | end | mc | score | id | - | sequence          | + | gravy | pl   | modification             |
|-----|---------------|---|-----------|------|-------|-----|----|-------|----|---|-------------------|---|-------|------|--------------------------|
| 139 | Q9HSQ7 Q9HSQ7 | 2 | 1747.8013 | -0.4 | 499   | 514 | 0  | 48.8  | 27 | I | QNLDPGYDTEVGERGV  | K | -1.1  | 3.58 |                          |
| 141 | Q9HSN5 Q9HSN5 | 1 | 600.3635  | 0.5  | 731   | 735 | 0  | 23.0  | 21 | I | WLAVL             | A | 2.5   | 6.02 |                          |
| 142 | Q9HS03 Q9HS03 | 1 | 515.3319  | 1.4  | 266   | 270 | 0  | 30.5  | 29 | G | LTLAV             | A | 2.6   | 6.02 |                          |
| 143 | Q9HQJ9 Q9HQJ9 | 1 | 584.3533  | 0.5  | 105   | 109 | 0  | 26.0  | 26 | E | EVKPL             | T | -0.2  | 6.94 |                          |
| 144 | Q9HQZ0 Q9HQZ0 | 1 | 545.3213  | -1.7 | 438   | 442 | 0  | 28.1  | 24 | Q | FGPLL             | L | 1.7   | 6.02 |                          |
| 145 | Q9HQA7 Q9HQA7 | 1 | 621.356   | 0.8  | 248   | 252 | 0  | 15.9  | 13 | V | VMFLL             | L | 3.3   | 6.02 |                          |
| 145 | Q9HQA7 Q9HQA7 | 1 | 734.4401  | -1.0 | 248   | 253 | 0  | 23.0  | 14 | V | VMFLLL            | G | 3.4   | 6.02 |                          |
| 145 | Q9HQA7 Q9HQA7 | 1 | 750.435   | -2.3 | 248   | 253 | 0  | 20.2  | 14 | V | VMFLLL            | G | 3.4   | 6.02 | Oxidation (M)            |
| 147 | Q9HS33 Q9HS33 | 1 | 545.3213  | -1.7 | 168   | 172 | 0  | 28.1  | 24 | G | FGPII             | A | 2.0   | 6.02 |                          |
| 147 | Q9HS33 Q9HS33 | 1 | 674.4367  | -1.0 | 301   | 306 | 0  | 24.6  | 21 | A | GFILI             | P | 3.3   | 6.02 |                          |
| 152 | Q9HSB1 Q9HSB1 | 1 | 685.4374  | -0.9 | 496   | 502 | 0  | 26.4  | 26 | D | VATALLV           | F | 2.7   | 6.02 |                          |
| 152 | Q9HSB1 Q9HSB1 | 1 | 910.5852  | 0.4  | 375   | 384 | 0  | 28.1  | 21 | T | VLAGGVLVAL        | S | 2.7   | 6.02 |                          |
| 153 | Q9HMT5 Q9HMT5 | 1 | 791.4582  | -1.0 | 186   | 191 | 0  | 34.6  | 22 | A | FLLWTI            | H | 2.2   | 6.02 |                          |
| 153 | Q9HMT5 Q9HMT5 | 1 | 1178.5132 | 0.8  | 316   | 325 | 0  | 30.5  | 25 | A | EYGYEPPEPV        | R | -1.4  | 3.02 |                          |
| 153 | Q9HMT5 Q9HMT5 | 2 | 1234.6016 | -0.7 | 223   | 233 | 0  | 27.3  | 26 | T | AFTEGERPMVV       | S | 0.1   | 4.26 |                          |
| 155 | Q9HI34 Q9HI34 | 1 | 585.3737  | 1.0  | 177   | 181 | 0  | 29.2  | 20 | L | ILLDL             | A | 2.5   | 3.1  |                          |
| 155 | Q9HI34 Q9HI34 | 1 | 656.4109  | 1.1  | 177   | 182 | 0  | 43.1  | 21 | L | ILLDLA            | Y | 2.4   | 3.1  |                          |
| 155 | Q9HI34 Q9HI34 | 1 | 769.4949  | 0.3  | 176   | 182 | 0  | 44.4  | 21 | R | LILLDLA           | Y | 2.6   | 3.1  |                          |
| 157 | Q9HSC3 LONH   | 2 | 1145.5274 | -3.6 | 529   | 538 | 0  | 26.2  | 26 | G | QLKEMAEAEAV       | E | -0.4  | 3.96 | Gln->pyro-Glu (N-term Q) |
| 157 | Q9HSC3 LONH   | 2 | 1146.6285 | 0.4  | 288   | 297 | 0  | 56.9  | 24 | A | NKGVLFIDEI        | N | 0.5   | 4.08 |                          |
| 157 | Q9HSC3 LONH   | 2 | 1812.7286 | -0.1 | 22    | 38  | 0  | 53.4  | 18 | S | VDHDDTDGLQDDPADSV | D | -1.2  | 3.14 |                          |
| 160 | Q9HI06 Q9HI06 | 1 | 555.3632  | 0.4  | 147   | 151 | 0  | 19.4  | 18 | D | LPTIL             | E | 2.0   | 6.02 |                          |
| 163 | Q9HRD0 Q9HRD0 | 1 | 684.417   | 0.7  | 112   | 119 | 0  | 38.1  | 27 | G | AIAGLGLA          | R | 2.1   | 6.02 |                          |
| 165 | Q9HPV6 Q9HPV6 | 1 | 674.4367  | -1.0 | 116   | 121 | 0  | 24.6  | 21 | T | IGFLLL            | F | 3.1   | 6.02 |                          |
| 167 | Q9HSM6 MUTL   | 2 | 1041.5818 | -1.2 | 321   | 330 | 0  | 29.6  | 27 | A | VEAGVRDALL        | D | 0.8   | 4.08 |                          |
| 168 | Q9HN16 Q9HN16 | 1 | 684.417   | -1.6 | 112   | 119 | 0  | 28.8  | 27 | N | VAAALGLA          | A | 2.3   | 6.02 |                          |
| 171 | Q9HP43 CARB   | 2 | 1010.6124 | -1.7 | 866   | 876 | 0  | 28.9  | 22 | K | ATGVPIAKLAA       | K | 1.2   | 10.1 |                          |
| 172 | Q9HPX5 Q9HPX5 | 1 | 545.3213  | -1.7 | 317   | 321 | 0  | 28.1  | 24 | V | FGPLI             | W | 1.8   | 6.02 |                          |
| 172 | Q9HPX5 Q9HPX5 | 1 | 545.3247  | -4.8 | 237   | 241 | 0  | 31.7  | 26 | T | LMGLL             | T | 2.6   | 6.02 |                          |
| 174 | Q9HNT7 Q9HNT7 | 1 | 584.3533  | 0.5  | 503   | 507 | 0  | 26.0  | 26 | A | VEKPI             | P | -0.1  | 6.94 |                          |
| 174 | Q9HNT7 Q9HNT7 | 1 | 741.3334  | -0.5 | 75    | 81  | 0  | 35.9  | 27 | T | GYGLDFA           | P | 0.4   | 3.1  |                          |
| 176 | Q9HRM4 Q9HRM4 | 1 | 897.5535  | -1.4 | 134   | 142 | 0  | 34.2  | 22 | T | EVIALAGLL         | A | 2.2   | 3.3  |                          |
| 177 | Q9HM71 Q9HM71 | 2 | 1306.5864 | 0.2  | 548   | 559 | 0  | 78.3  | 26 | T | MFVADDTVAHTT      | A | 0.4   | 3.88 |                          |
| 178 | O54630 O54630 | 1 | 567.3996  | -1.9 | 96    | 100 | 0  | 30.4  | 17 | P | LPIL              | I | 3.0   | 6.02 |                          |
| 185 | Q9HN44 Q9HN44 | 1 | 642.3952  | -1.4 | 204   | 209 | 0  | 27.0  | 27 | V | AVELLV            | G | 2.4   | 3.3  |                          |
| 186 | Q9HHU7 Q9HHU7 | 1 | 690.4316  | 1.2  | 385   | 390 | 0  | 21.2  | 21 | L | LSFIIV            | N | 3.2   | 6.02 |                          |
| 187 | Q9HPF9 Q9HPF9 | 1 | 1137.519  | -0.8 | 280   | 289 | 0  | 35.0  | 27 | T | GLQVEDFETT        | D | -0.5  | 2.94 |                          |
| 187 | Q9HPF9 Q9HPF9 | 2 | 1300.6987 | 0.8  | 82    | 94  | 0  | 39.5  | 27 | V | RAVGLESGLVEAT     | R | 0.4   | 4.26 |                          |
| 192 | Q9HRT3 Q9HRT3 | 1 | 642.3952  | -0.5 | 259   | 264 | 0  | 27.1  | 27 | R | ADILLV            | G | 2.4   | 3.1  |                          |
| 193 | Q9HQ81 Q9HQ81 | 1 | 690.3952  | 1.2  | 263   | 268 | 0  | 23.5  | 23 | A | IDFALI            | P | 2.3   | 3.1  |                          |



| hit | accession     | z | mass      | ppm  | start | end | mc | score | id | - | sequence     | + | gravy | pl    | modification  |
|-----|---------------|---|-----------|------|-------|-----|----|-------|----|---|--------------|---|-------|-------|---------------|
| 197 | Q9HMK9 IF2G   | 1 | 756.4381  | -0.4 | 137   | 143 | 0  | 39.9  | 27 | I | IGIENIV      | I | 1.5   | 3.3   |               |
| 199 | O73955 CATA   | 1 | 642.3952  | -1.4 | 519   | 524 | 0  | 27.0  | 27 | S | LADLIV       | L | 2.4   | 3.1   |               |
| 199 | O73955 CATA   | 1 | 656.4109  | -1.5 | 138   | 143 | 0  | 33.7  | 26 | G | DLIILA       | G | 2.5   | 3.1   |               |
| 200 | Q9HMX2 Q9HMX2 | 1 | 543.3268  | -0.7 | 220   | 224 | 0  | 32.6  | 30 | R | DLAIL        | F | 2.1   | 3.1   |               |
| 201 | Q9HN70 THSA   | 1 | 681.4425  | 0.7  | 8     | 13  | 0  | 25.7  | 22 | N | QPLIVL       | S | 1.9   | 6.02  |               |
| 205 | P71411 BACS2  | 1 | 643.3541  | -0.2 | 210   | 216 | 0  | 35.8  | 31 | A | VLGADAV      | S | 1.7   | 3.1   |               |
| 205 | P71411 BACS2  | 1 | 725.4476  | -0.7 | 172   | 177 | 0  | 24.7  | 21 | Y | PVVWLL       | S | 2.3   | 6.02  |               |
| 206 | Q9HQD6 HUTI   | 1 | 636.3119  | 1.7  | 192   | 197 | 0  | 33.6  | 30 | D | AYVDAV       | I | 1.2   | 3.1   |               |
| 207 | O52009 O52009 | 1 | 544.3221  | 0.6  | 59    | 63  | 0  | 32.8  | 32 | R | TQILA        | S | 1.2   | 6.02  |               |
| 209 | Q9HRJ3 Q9HRJ3 | 1 | 690.3952  | 0.3  | 50    | 55  | 0  | 24.0  | 23 | L | LFADLI       | A | 2.2   | 3.1   |               |
| 209 | Q9HRJ3 Q9HRJ3 | 1 | 959.5692  | -2.3 | 50    | 58  | 0  | 28.6  | 21 | L | LFADLIAVV    | N | 2.6   | 3.1   |               |
| 211 | Q9HMU6 Q9HMU6 | 2 | 1221.6394 | 2.0  | 134   | 145 | 0  | 53.3  | 26 | I | SFIPFSQLVGGA | V | 1.0   | 6.02  |               |
| 212 | Q9HP06 Q9HP06 | 1 | 561.3163  | 0.5  | 78    | 82  | 0  | 25.0  | 25 | E | PFVSL        | V | 1.7   | 6.02  |               |
| 212 | Q9HP06 Q9HP06 | 1 | 585.3737  | 1.0  | 266   | 270 | 0  | 29.2  | 20 | D | LILDL        | E | 2.5   | 3.1   |               |
| 212 | Q9HP06 Q9HP06 | 2 | 981.6447  | 4.0  | 7     | 15  | 0  | 21.8  | 13 | A | VRRVGLVL     | A | 1.4   | 12.4  |               |
| 214 | Q9HQ03 Q9HQ03 | 1 | 642.3952  | -0.5 | 15    | 20  | 0  | 44.7  | 27 | G | IDALLV       | F | 2.4   | 3.1   |               |
| 215 | Q9HPA2 Q9HPA2 | 1 | 666.3588  | 1.2  | 69    | 74  | 0  | 21.0  | 21 | A | FSTSL        | A | 1.4   | 6.02  |               |
| 216 | Q9HNG6 Q9HNG6 | 1 | 889.5273  | -0.9 | 89    | 97  | 0  | 25.9  | 24 | G | FLGIVIGTA    | A | 2.2   | 6.02  |               |
| 218 | Q9HRE4 Q9HRE4 | 2 | 869.4429  | -3.1 | 155   | 162 | 0  | 23.3  | 22 | L | HSIAAQMI     | G | 0.9   | 7.84  |               |
| 219 | Q9HRH7 Q9HRH7 | 2 | 995.6127  | 0.7  | 521   | 530 | 0  | 22.0  | 19 | A | LRGASPGLLL   | V | 0.9   | 11.04 |               |
| 224 | Q9HRR0 Q9HRR0 | 1 | 706.3901  | -0.4 | 69    | 74  | 0  | 27.0  | 25 | I | DLSFIL       | M | 1.8   | 3.1   |               |
| 224 | Q9HRR0 Q9HRR0 | 2 | 1459.6653 | 0.3  | 109   | 120 | 0  | 63.8  | 26 | T | SMFENTVEQFKT | A | -0.7  | 4.26  |               |
| 224 | Q9HRR0 Q9HRR0 | 2 | 1475.6602 | -1.6 | 109   | 120 | 0  | 29.0  | 26 | T | SMFENTVEQFKT | A | -0.7  | 4.26  | Oxidation (M) |
| 225 | Q9HQ63 DHSD   | 1 | 654.3377  | 0.9  | 125   | 130 | 0  | 23.3  | 22 | T | FLTGAF       | - | 1.7   | 6.02  |               |
| 225 | Q9HQ63 DHSD   | 2 | 1109.5757 | 0.3  | 120   | 130 | 0  | 39.8  | 26 | V | ASVPTFLTGAF  | - | 1.2   | 6.02  |               |
| 226 | Q9HQN5 Q9HQN5 | 1 | 600.3635  | 0.5  | 455   | 459 | 0  | 26.7  | 21 | C | WGLL         | A | 2.0   | 6.02  |               |
| 226 | Q9HQN5 Q9HQN5 | 1 | 621.356   | 0.8  | 356   | 360 | 0  | 14.7  | 13 | E | MFIVL        | V | 3.4   | 6.02  |               |
| 232 | Q9HQQ5 Q9HQQ5 | 1 | 681.4425  | -0.1 | 432   | 438 | 0  | 26.1  | 22 | S | LPAGIVL      | V | 2.3   | 6.02  |               |
| 232 | Q9HQQ5 Q9HQQ5 | 1 | 848.4314  | -1.4 | 219   | 226 | 0  | 35.8  | 27 | Q | SMDTLVLA     | V | 1.3   | 3.1   |               |
| 236 | Q9HRN5 Q9HRN5 | 1 | 664.3796  | -2.0 | 11    | 16  | 0  | 39.4  | 24 | A | YSLGLL       | G | 1.5   | 5.92  |               |
| 239 | Q9HRT5 Q9HRT5 | 1 | 634.369   | 1.6  | 310   | 315 | 0  | 31.0  | 27 | A | LFAALT       | A | 2.2   | 6.02  |               |
| 239 | Q9HRT5 Q9HRT5 | 1 | 685.4374  | -0.9 | 369   | 375 | 0  | 26.3  | 26 | A | VVSGLLV      | A | 2.7   | 6.02  |               |
| 244 | Q9HP89 Q9HP89 | 2 | 956.4451  | 0.6  | 157   | 166 | 0  | 31.5  | 26 | P | APDADALADV   | H | 0.3   | 2.82  |               |
| 245 | Q9HPD9 Q9HPD9 | 1 | 674.4367  | -1.0 | 225   | 230 | 0  | 24.6  | 21 | R | FGLLLL       | A | 2.9   | 6.02  |               |
| 246 | Q9HM75 Q9HM75 | 1 | 572.3322  | 0.7  | 9     | 13  | 0  | 30.8  | 21 | L | AWVVV        | A | 2.7   | 6.02  |               |
| 246 | Q9HM75 Q9HM75 | 1 | 600.3635  | 0.5  | 48    | 52  | 0  | 26.7  | 21 | F | WGLLI        | E | 2.2   | 6.02  |               |
| 247 | Q9HNC9 Q9HNC9 | 1 | 587.3716  | 1.4  | 1     | 5   | 0  | 14.7  | 13 | - | MLLVL        | C | 3.5   | 6.02  |               |
| 248 | Q9HQ64 Q9HQ64 | 1 | 591.3017  | -0.2 | 115   | 120 | 0  | 32.7  | 24 | A | NALAGF       | - | 1.1   | 6.02  |               |
| 248 | Q9HQ64 Q9HQ64 | 1 | 621.356   | 0.8  | 63    | 67  | 0  | 14.7  | 13 | T | MVLFL        | V | 3.3   | 6.02  |               |
| 248 | Q9HQ64 Q9HQ64 | 1 | 741.3333  | -0.5 | 43    | 48  | 0  | 35.9  | 27 | A | YNIDFA       | G | 0.1   | 3.1   |               |

| hit | accession     | z | mass      | ppm  | start | end | mc | score | id | - | sequence                 | + | gravy | pl    | modification |
|-----|---------------|---|-----------|------|-------|-----|----|-------|----|---|--------------------------|---|-------|-------|--------------|
| 248 | Q9HQ64 Q9HQ64 | 1 | 754.4953  | -0.4 | 105   | 111 | 0  | 26.8  | 24 | V | LLIVQGI                  | R | 2.4   | 6.02  |              |
| 249 | Q9HHR2 Q9HHR2 | 2 | 1156.6339 | 0.7  | 230   | 240 | 0  | 29.1  | 26 | S | VDAVIEANTLL              | S | 1.2   | 3     |              |
| 251 | Q9HRW7 Q9HRW7 | 1 | 933.4994  | -4.3 | 30    | 38  | 0  | 30.1  | 27 | V | MTAVLFGVP                | Y | 1.8   | 6.02  |              |
| 251 | Q9HRW7 Q9HRW7 | 2 | 1618.7012 | -0.1 | 2     | 15  | 0  | 54.0  | 24 | M | SDALDAFDHDAWRT           | A | -0.9  | 3.86  |              |
| 252 | Q9HN22 Q9HN22 | 2 | 1719.8104 | 0.6  | 149   | 165 | 0  | 27.4  | 27 | A | AAFLADIDHSAYGTTPA        | Q | 0.3   | 3.88  |              |
| 254 | Q9HN92 Q9HN92 | 2 | 1066.646  | 0.9  | 11    | 20  | 0  | 19.9  | 19 | T | VMPLLSLVPV               | A | 2.2   | 6.02  |              |
| 254 | Q9HN92 Q9HN92 | 2 | 1238.7308 | 0.6  | 9     | 20  | 0  | 44.3  | 20 | I | ATVMPLLSLVPV             | A | 1.9   | 6.02  |              |
| 258 | Q9HPR5 Q9HPR5 | 1 | 700.4007  | 1.0  | 290   | 295 | 0  | 29.3  | 29 | A | VEDLLI                   | L | 1.6   | 3     |              |
| 263 | Q9HM70 Q9HM70 | 1 | 569.4152  | 0.2  | 600   | 604 | 0  | 28.5  | 17 | V | ILLLV                    | V | 4.0   | 6.02  |              |
| 263 | Q9HM70 Q9HM70 | 1 | 612.3847  | 1.0  | 432   | 437 | 0  | 32.9  | 24 | E | LVTPI                    | Q | 2.0   | 6.02  |              |
| 266 | Q9HR01 Q9HR01 | 1 | 572.3322  | 0.7  | 134   | 138 | 0  | 25.2  | 21 | E | WVAVV                    | F | 2.7   | 6.02  |              |
| 267 | Q9HSL4 Q9HSL4 | 1 | 643.3541  | -0.2 | 5     | 11  | 0  | 34.0  | 31 | I | IVGAGDI                  | G | 1.5   | 3.1   |              |
| 268 | O51984 O51984 | 1 | 643.3541  | 0.6  | 288   | 293 | 0  | 41.3  | 31 | T | IVQDGL                   | A | 0.9   | 3.1   |              |
| 270 | Q9HSF1 Q9HSF1 | 2 | 1009.6284 | 0.6  | 8     | 17  | 0  | 19.4  | 18 | L | LAPRSLAVLA               | G | 1.4   | 11.04 |              |
| 270 | Q9HSF1 Q9HSF1 | 2 | 1501.6321 | 0.9  | 318   | 332 | 0  | 38.0  | 22 | S | AFDHPEGLGGDTDTA          | T | -0.7  | 3.5   |              |
| 271 | Q9HMM6 CSD    | 1 | 617.3425  | -0.2 | 18    | 22  | 0  | 27.2  | 21 | D | FPILE                    | R | 1.2   | 3.3   |              |
| 271 | Q9HMM6 CSD    | 2 | 1468.7773 | 2.3  | 183   | 197 | 0  | 27.6  | 25 | N | TLGTVNPVGEADIA           | H | 0.7   | 3     |              |
| 272 | Q9HRJ8 Q9HRJ8 | 1 | 751.3938  | -3.3 | 426   | 432 | 0  | 23.5  | 23 | N | AYLGCLL                  | V | 2.0   | 5.32  |              |
| 272 | Q9HRJ8 Q9HRJ8 | 1 | 939.5753  | -4.5 | 54    | 64  | 0  | 25.7  | 22 | T | GLAVVGA AVLA             | W | 2.4   | 6.02  |              |
| 273 | Q9HPQ4 Q9HPQ4 | 1 | 706.3901  | -0.3 | 233   | 238 | 0  | 26.6  | 25 | E | EVAYLI                   | M | 1.6   | 3.3   |              |
| 276 | Q9HPL9 Q9HPL9 | 1 | 685.4374  | 2.5  | 120   | 126 | 0  | 40.9  | 26 | S | AIGLVTL                  | G | 2.4   | 6.02  |              |
| 277 | Q9HRM6 Q9HRM6 | 1 | 543.3268  | -0.7 | 115   | 119 | 0  | 32.6  | 30 | D | EVALL                    | D | 2.0   | 3.3   |              |
| 278 | Q9HNI3 Q9HNI3 | 1 | 684.417   | -1.6 | 97    | 104 | 0  | 39.7  | 27 | V | AVVGGVLA                 | V | 2.4   | 6.02  |              |
| 283 | Q9HN79 Q9HN79 | 1 | 612.3847  | 1.0  | 20    | 25  | 0  | 27.8  | 24 | L | VLTAPL                   | V | 1.9   | 6.02  |              |
| 286 | Q9HSA1 Q9HSA1 | 1 | 832.4178  | 0.0  | 271   | 278 | 0  | 31.2  | 28 | D | GEISDLVT                 | I | 0.5   | 3     |              |
| 287 | Q9HQI5 Q9HQI5 | 1 | 832.4178  | 0.1  | 148   | 155 | 0  | 34.1  | 28 | I | LSGDEIVT                 | H | 0.5   | 3     |              |
| 289 | Q9HNP8 Q9HNP8 | 1 | 700.4007  | 0.7  | 569   | 574 | 0  | 40.6  | 29 | A | LVEDIL                   | D | 1.6   | 3     |              |
| 291 | Q9HPD4 RL3    | 3 | 2508.1558 | 1.0  | 178   | 201 | 0  | 33.2  | 27 | A | DLIEDGGVHAFGDVFRAGEFTDAA | G | 0.1   | 3.68  |              |
| 293 | Q9HQP1 Q9HQP1 | 1 | 628.416   | 0.0  | 14    | 19  | 0  | 29.5  | 25 | G | TIALIV                   | G | 3.0   | 6.02  |              |
| 293 | Q9HQP1 Q9HQP1 | 1 | 685.4374  | -0.9 | 13    | 19  | 0  | 26.4  | 26 | G | GTIALIV                  | G | 2.5   | 6.02  |              |
| 297 | Q9HSR4 Q9HSR4 | 1 | 887.4786  | -1.0 | 126   | 133 | 0  | 29.3  | 25 | V | EVNLLGLM                 | N | 1.3   | 3.3   |              |
| 298 | Q9HRJ7 Q9HRJ7 | 1 | 714.3588  | -0.4 | 35    | 40  | 0  | 39.2  | 20 | L | YFALTT                   | A | 1.0   | 5.92  |              |
| 301 | Q9HMK3 SYFB   | 2 | 1187.571  | -4.0 | 166   | 176 | 0  | 30.3  | 27 | G | IDPDGDFTVPL              | D | 0.0   | 2.82  |              |
| 303 | O51978 O51978 | 1 | 587.3716  | 1.4  | 78    | 82  | 0  | 25.6  | 13 | T | IMLLV                    | V | 3.6   | 6.02  |              |
| 303 | O51978 O51978 | 1 | 668.4473  | 0.9  | 73    | 78  | 0  | 22.3  | 14 | Y | ILPLTI                   | M | 2.4   | 6.02  |              |
| 303 | O51978 O51978 | 1 | 757.4772  | -4.6 | 79    | 85  | 0  | 19.6  | 19 | I | MLLVVAL                  | A | 3.4   | 6.02  |              |
| 304 | Q9HSG5 TRUD   | 1 | 617.3173  | 1.5  | 230   | 235 | 0  | 32.9  | 27 | D | WTGALA                   | E | 0.9   | 6.02  |              |
| 304 | Q9HSG5 TRUD   | 1 | 653.4112  | 1.1  | 427   | 432 | 0  | 25.6  | 24 | F | LKPSPL                   | A | -0.1  | 10.1  |              |
| 306 | Q9HP92 Q9HP92 | 1 | 617.3425  | -0.2 | 343   | 347 | 0  | 27.2  | 21 | V | FLLEP                    | D | 1.1   | 3.3   |              |
| 306 | Q9HP92 Q9HP92 | 1 | 727.448   | -0.1 | 187   | 193 | 0  | 37.2  | 25 | V | LLALDLA                  | F | 2.2   | 3.1   |              |

| hit | accession     | z | mass      | ppm  | start | end | mc | score | id | - | sequence                | + | gravy | pl    | modification |
|-----|---------------|---|-----------|------|-------|-----|----|-------|----|---|-------------------------|---|-------|-------|--------------|
| 308 | Q9HP12 Q9HP12 | 1 | 684.417   | 0.3  | 165   | 172 | 0  | 40.0  | 27 | A | VG VAGVLA               | V | 2.4   | 6.02  |              |
| 309 | Q9HRC9 Q9HRC9 | 2 | 1970.7138 | 1.0  | 249   | 267 | 0  | 16.1  | 13 | A | DVQPGDDDEPGDDEDGAEP     | - | -2.0  | 2.54  |              |
| 309 | Q9HRC9 Q9HRC9 | 2 | 2112.788  | 0.7  | 247   | 267 | 0  | 67.7  | 13 | A | AADVQPGDDDEPGDDEDGAEP   | - | -1.7  | 2.54  |              |
| 311 | Q9HPU7 Q9HPU7 | 1 | 600.3635  | 0.5  | 302   | 306 | 0  | 26.7  | 21 | S | WAVLI                   | V | 2.7   | 6.02  |              |
| 311 | Q9HPU7 Q9HPU7 | 1 | 642.4105  | 0.9  | 318   | 322 | 0  | 15.8  | 13 | A | VLWLL                   | S | 2.9   | 6.02  |              |
| 312 | Q9HRL4 Q9HRL4 | 1 | 706.4088  | 0.3  | 28    | 33  | 0  | 14.7  | 13 | S | ALLFLM                  | S | 3.0   | 6.02  |              |
| 312 | Q9HRL4 Q9HRL4 | 2 | 1054.5083 | -0.7 | 83    | 90  | 0  | 37.1  | 27 | T | LYRNFDDI                | D | -0.7  | 3.88  |              |
| 312 | Q9HRL4 Q9HRL4 | 2 | 1369.6514 | 1.5  | 83    | 93  | 0  | 31.5  | 27 | T | LYRNFDDIDVT             | N | -0.5  | 3.6   |              |
| 314 | Q9HN02 Q9HN02 | 2 | 1096.5917 | -0.9 | 163   | 171 | 0  | 30.9  | 25 | V | LF DYLTRAV              | N | 0.7   | 6.7   |              |
| 316 | Q9HSC1 TRPC   | 1 | 735.4167  | 1.8  | 114   | 119 | 0  | 24.6  | 24 | R | KDFLLT                  | E | 0.4   | 6.76  |              |
| 317 | Q9HMK5 Q9HMK5 | 2 | 1299.6493 | -2.2 | 250   | 261 | 0  | 38.7  | 27 | T | DADLLAVLRDCP            | A | 0.4   | 3.6   |              |
| 318 | O51963 O51963 | 1 | 585.3737  | 1.0  | 192   | 196 | 0  | 29.2  | 20 | E | LLIDL                   | R | 2.5   | 3.1   |              |
| 319 | Q9HRN6 Q9HRN6 | 1 | 586.3479  | 0.3  | 130   | 134 | 0  | 31.6  | 21 | I | WVLLG                   | L | 2.1   | 6.02  |              |
| 320 | Q9HQT0 Q9HQT0 | 1 | 681.4425  | -0.1 | 234   | 240 | 0  | 26.1  | 22 | T | PIAGIVL                 | V | 2.4   | 6.02  |              |
| 322 | Q9HMG3 Q9HMG3 | 2 | 2335.0717 | -1.7 | 44    | 67  | 0  | 70.0  | 27 | A | STVPETDFPEPYNRSIGGGGAGA | V | -0.6  | 3.82  |              |
| 323 | Q9HMB7 Q9HMB7 | 1 | 700.4007  | 0.7  | 134   | 139 | 0  | 40.6  | 29 | P | VLEDLI                  | D | 1.6   | 3     |              |
| 327 | Q9HQV9 Q9HQV9 | 1 | 656.4109  | -0.3 | 495   | 500 | 0  | 43.9  | 26 | N | ILDLLA                  | L | 2.4   | 3.1   |              |
| 327 | Q9HQV9 Q9HQV9 | 1 | 769.4949  | -1.4 | 495   | 501 | 0  | 30.1  | 21 | N | ILDLLAL                 | G | 2.6   | 3.1   |              |
| 328 | Q9HR50 Q9HR50 | 1 | 745.4374  | 0.5  | 39    | 45  | 0  | 27.6  | 24 | A | YAVPVVV                 | - | 2.2   | 5.92  |              |
| 328 | Q9HR50 Q9HR50 | 2 | 1306.6227 | 3.7  | 14    | 25  | 0  | 32.4  | 28 | T | APMQEFSIGQVT            | N | 0.1   | 3.3   |              |
| 329 | Q9HMZ1 Q9HMZ1 | 1 | 642.3952  | -0.5 | 71    | 76  | 0  | 27.1  | 27 | G | VEAIVL                  | F | 2.5   | 3.3   |              |
| 329 | Q9HMZ1 Q9HMZ1 | 1 | 1027.4862 | -0.8 | 315   | 323 | 0  | 26.7  | 26 | I | ITYFAEDVA               | E | 0.7   | 3     |              |
| 335 | Q9HPQ2 Q9HPQ2 | 1 | 870.5249  | -0.7 | 167   | 174 | 0  | 19.8  | 16 | K | LMVPSILV                | M | 2.5   | 6.02  |              |
| 337 | Q9HMD8 Q9HMD8 | 1 | 755.4541  | 1.3  | 32    | 39  | 0  | 27.7  | 25 | L | QVVGVALA                | V | 2.0   | 6.02  |              |
| 337 | Q9HMD8 Q9HMD8 | 1 | 868.5382  | -1.6 | 31    | 39  | 0  | 32.2  | 23 | R | LQVVGVALA               | V | 2.2   | 6.02  |              |
| 339 | Q9HHQ6 Q9HHQ6 | 2 | 1316.6976 | 3.0  | 148   | 159 | 0  | 42.1  | 25 | A | DLGWTNTLLAIT            | G | 0.6   | 3.1   |              |
| 343 | Q9HQI9 ENO    | 1 | 962.5073  | 0.3  | 255   | 263 | 0  | 28.8  | 27 | A | AQIEYVAGL               | V | 0.8   | 3.3   |              |
| 349 | Q9HRZ5 Q9HRZ5 | 1 | 543.3268  | 1.5  | 69    | 73  | 0  | 30.1  | 29 | L | DILIA                   | L | 2.2   | 3.1   |              |
| 349 | Q9HRZ5 Q9HRZ5 | 1 | 656.4109  | -1.5 | 68    | 73  | 0  | 33.7  | 26 | R | LDILIA                  | L | 2.5   | 3.1   |              |
| 350 | Q9HR72 Q9HR72 | 1 | 621.356   | 0.8  | 62    | 66  | 0  | 18.0  | 13 | I | MLFVL                   | F | 3.3   | 6.02  |              |
| 353 | Q9HNE5 Q9HNE5 | 2 | 995.5804  | 0.6  | 17    | 25  | 0  | 33.7  | 22 | T | GLWVQALPL               | R | 1.2   | 6.02  |              |
| 355 | Q9HMC6 Q9HMC6 | 2 | 887.5593  | 1.2  | 336   | 343 | 0  | 22.3  | 15 | H | IARFLLGV                | R | 2.0   | 11.04 |              |
| 357 | Q9HRF8 Q9HRF8 | 1 | 610.4054  | -1.5 | 221   | 226 | 0  | 23.4  | 22 | D | LLGVPL                  | A | 2.3   | 6.02  |              |
| 360 | Q9HQS6 Q9HQS6 | 1 | 636.3119  | 0.2  | 163   | 168 | 0  | 43.8  | 30 | T | FDGVTV                  | L | 1.1   | 3.1   |              |
| 362 | P13077 FLAB2  | 1 | 1100.5502 | -0.5 | 102   | 111 | 0  | 48.9  | 28 | S | TIQWIGPDTA              | T | -0.1  | 3.1   |              |
| 364 | Q9HM89 EF1A   | 1 | 755.4541  | 1.3  | 110   | 117 | 0  | 35.2  | 25 | D | NAVLVVAA                | D | 2.3   | 6.02  |              |
| 365 | Q9HSG1 Q9HSG1 | 1 | 681.4425  | 0.9  | 214   | 220 | 0  | 26.1  | 22 | L | PVAVALL                 | A | 2.6   | 6.02  |              |
| 367 | Q9HHR9 Q9HHR9 | 1 | 567.3996  | -1.9 | 223   | 227 | 0  | 30.4  | 17 | V | LPLLI                   | S | 2.9   | 6.02  |              |
| 370 | O52039 O52039 | 1 | 681.4425  | 0.3  | 177   | 183 | 0  | 30.1  | 22 | A | IPGIGII                 | A | 2.2   | 6.02  |              |
| 371 | Q9HP02 Q9HP02 | 1 | 683.4218  | 0.4  | 186   | 192 | 0  | 24.5  | 24 | D | VTLPAIA                 | P | 2.0   | 6.02  |              |

| hit | accession     | z | mass      | ppm  | start | end | mc | score | id | - | sequence              | + | gravy | pI    | modification  |
|-----|---------------|---|-----------|------|-------|-----|----|-------|----|---|-----------------------|---|-------|-------|---------------|
| 372 | Q9HMP2 Q9HMP2 | 2 | 851.4501  | -3.3 | 7     | 14  | 0  | 26.0  | 25 | R | QHAAVIVD              | R | 0.8   | 4.94  |               |
| 373 | P50562 RL18   | 2 | 1331.7561 | 1.0  | 82    | 94  | 0  | 38.8  | 22 | A | AYLTGLLAGQRAV         | D | 0.8   | 9.84  |               |
| 378 | Q9HP11 Q9HP11 | 2 | 1100.59   | 2.3  | 221   | 231 | 0  | 29.2  | 27 | R | GVPVMVAAQTL           | K | 1.4   | 6.02  | Oxidation (M) |
| 384 | Q9HRE2 Q9HRE2 | 1 | 714.468   | -0.6 | 22    | 27  | 0  | 22.5  | 13 | I | LPFLLL                | G | 2.7   | 6.02  |               |
| 385 | Q9HQ25 Q9HQ25 | 1 | 714.468   | -0.6 | 45    | 50  | 0  | 21.0  | 13 | V | LLPFLI                | G | 2.9   | 6.02  |               |
| 385 | Q9HQ25 Q9HQ25 | 1 | 870.5579  | -1.1 | 43    | 50  | 0  | 18.1  | 18 | A | GVLLPFLI              | G | 2.6   | 6.02  |               |
| 387 | Q9HR91 Q9HR91 | 1 | 643.3541  | -0.2 | 183   | 189 | 0  | 39.8  | 31 | L | LVGADAV               | E | 1.7   | 3.1   |               |
| 388 | Q9HQF0 Q9HQF0 | 1 | 543.3268  | -0.7 | 27    | 31  | 0  | 32.6  | 30 | V | EVAII                 | V | 2.3   | 3.3   |               |
| 388 | Q9HQF0 Q9HQF0 | 1 | 642.3952  | -0.5 | 27    | 32  | 0  | 44.7  | 27 | V | EVAIIV                | E | 2.6   | 3.3   |               |
| 390 | Q9HSA2 Q9HSA2 | 1 | 968.5906  | -1.3 | 98    | 107 | 0  | 26.7  | 21 | S | DVLGAVALLV            | G | 2.4   | 3.1   |               |
| 393 | Q9HRB8 Q9HRB8 | 1 | 889.5273  | -0.9 | 14    | 22  | 0  | 29.8  | 24 | V | GIVFGLLTA             | A | 2.2   | 6.02  |               |
| 393 | Q9HRB8 Q9HRB8 | 1 | 960.5644  | -0.5 | 14    | 23  | 0  | 32.6  | 23 | V | GIVFGLLTAA            | A | 2.1   | 6.02  |               |
| 394 | Q9HRL5 Q9HRL5 | 1 | 904.4906  | -0.1 | 49    | 56  | 0  | 33.5  | 25 | A | AFEIIDVV              | L | 1.9   | 3     |               |
| 398 | Q9HNG3 Q9HNG3 | 1 | 585.3737  | 1.0  | 193   | 197 | 0  | 29.2  | 20 | E | LLLDI                 | A | 2.5   | 3.1   |               |
| 398 | Q9HNG3 Q9HNG3 | 1 | 656.4109  | 1.1  | 193   | 198 | 0  | 43.1  | 21 | E | LLLDIA                | D | 2.4   | 3.1   |               |
| 399 | Q9HS00 Q9HS00 | 1 | 684.417   | 0.0  | 535   | 542 | 0  | 28.6  | 27 | V | ALAAVAVA              | L | 2.7   | 6.02  |               |
| 399 | Q9HS00 Q9HS00 | 1 | 868.5382  | -0.6 | 264   | 273 | 0  | 26.6  | 23 | V | VVAGAGVLLA            | V | 2.5   | 6.02  |               |
| 401 | P13078 FLAB3  | 2 | 1127.5975 | 1.5  | 98    | 107 | 0  | 48.0  | 26 | S | TIQWIGPDKA            | T | -0.4  | 6.76  |               |
| 403 | Q9HMW6 Q9HMW6 | 1 | 600.3635  | 0.7  | 44    | 48  | 0  | 26.6  | 21 | G | WVLLA                 | T | 2.5   | 6.02  |               |
| 403 | Q9HMW6 Q9HMW6 | 1 | 1114.5845 | 0.7  | 96    | 106 | 0  | 34.0  | 27 | I | PLGSAAMWLV            | A | 1.4   | 6.02  |               |
| 404 | Q9HRD4 Q9HRD4 | 1 | 765.4636  | -1.0 | 172   | 178 | 0  | 23.6  | 16 | Q | DPLVLLP               | E | 1.3   | 3.1   |               |
| 411 | Q9HRV6 Q9HRV6 | 2 | 1043.5723 | 3.6  | 312   | 321 | 0  | 28.7  | 27 | T | ILKGRGATDN            | H | -0.7  | 10.08 |               |
| 415 | Q9HSY7 Q9HSY7 | 1 | 699.4167  | -1.0 | 176   | 182 | 0  | 39.5  | 28 | A | LLGALDV               | S | 1.9   | 3.1   |               |
| 415 | Q9HSY7 Q9HSY7 | 2 | 1468.7773 | 3.7  | 131   | 144 | 0  | 29.4  | 27 | L | DSGIEQEIGKVVVP        | A | 0.0   | 3.82  |               |
| 417 | Q9HQU0 Q9HQU0 | 1 | 731.4582  | 0.7  | 108   | 114 | 0  | 24.3  | 23 | S | AGVFLLI               | S | 2.9   | 6.02  |               |
| 417 | Q9HQU0 Q9HQU0 | 1 | 818.4902  | 0.4  | 108   | 115 | 0  | 34.6  | 24 | S | AGVFLLIS              | S | 2.5   | 6.02  |               |
| 423 | Q9HMK2 PYRD   | 2 | 672.3919  | 0.1  | 301   | 307 | 0  | 33.3  | 29 | K | IRAGASV               | V | 0.9   | 11.04 |               |
| 424 | Q9HQP8 Q9HQP8 | 1 | 745.4375  | 0.4  | 5     | 11  | 0  | 25.1  | 24 | S | PFVSVVV               | P | 2.5   | 6.02  |               |
| 425 | P05971 RL15   | 2 | 1332.5582 | 0.9  | 93    | 104 | 0  | 43.3  | 22 | V | DARDVVDDGWDA          | D | -0.9  | 3.3   |               |
| 425 | P05971 RL15   | 3 | 1863.8374 | 0.9  | 124   | 142 | 0  | 39.4  | 26 | A | DAFSDAAVELIEGEGGDAV   | V | 0.2   | 2.72  |               |
| 426 | Q9HMH9 PYRC   | 1 | 567.3996  | -1.9 | 318   | 322 | 0  | 30.4  | 17 | A | LPLLL                 | G | 2.7   | 6.02  |               |
| 427 | Q9HPR3 Q9HPR3 | 1 | 861.4596  | -1.7 | 446   | 452 | 0  | 31.3  | 27 | D | FQQDLLV               | G | 0.6   | 3.1   |               |
| 428 | Q9HR79 Q9HR79 | 1 | 543.3268  | 0.2  | 131   | 135 | 0  | 31.8  | 29 | R | EAVLI                 | A | 2.2   | 3.3   |               |
| 432 | Q9HR30 Q9HR30 | 1 | 653.4112  | 1.2  | 418   | 423 | 0  | 29.2  | 24 | F | QAILPL                | G | 1.5   | 6.02  |               |
| 433 | Q9HRF4 Q9HRF4 | 3 | 2108.9134 | -2.9 | 12    | 33  | 0  | 23.1  | 23 | D | TPQSASSATQDDDGAAADAFA | L | -0.3  | 2.74  |               |
| 436 | Q9HNA5 Q9HNA5 | 1 | 664.3068  | 1.2  | 753   | 758 | 0  | 44.1  | 29 | E | FDADV                 | E | 1.0   | 2.92  |               |
| 439 | Q9HHY0 Q9HHY0 | 1 | 626.4003  | -0.2 | 144   | 149 | 0  | 35.0  | 22 | D | SILVPV                | V | 2.4   | 6.02  |               |
| 440 | Q9HRW2 Q9HRW2 | 1 | 910.5852  | 0.4  | 32    | 41  | 0  | 23.1  | 21 | L | GGVLAVLAIV            | L | 2.8   | 6.02  |               |
| 440 | Q9HRW2 Q9HRW2 | 1 | 939.5753  | 1.0  | 30    | 39  | 0  | 29.7  | 22 | L | QLGGVLAVLA            | I | 1.9   | 6.02  |               |
| 442 | Q9HHR8 Q9HHR8 | 1 | 585.3737  | 1.0  | 116   | 120 | 0  | 21.0  | 20 | A | LLIEV                 | I | 2.6   | 3.3   |               |

| hit | accession       | z | mass      | ppm  | start | end | mc | score | id | - | sequence         | + | gravy | pl    | modification  |
|-----|-----------------|---|-----------|------|-------|-----|----|-------|----|---|------------------|---|-------|-------|---------------|
| 445 | Q9HML1 Q9HML1   | 1 | 543.3268  | 1.5  | 35    | 39  | 0  | 30.1  | 29 | L | EVLLA            | D | 2.0   | 3.3   |               |
| 445 | Q9HML1 Q9HML1   | 1 | 656.4109  | -0.3 | 34    | 39  | 0  | 26.2  | 26 | L | LEVLLA           | D | 2.3   | 3.3   |               |
| 445 | Q9HML1 Q9HML1   | 1 | 769.4949  | 0.3  | 33    | 39  | 0  | 29.9  | 21 | A | LLEVLLA          | D | 2.5   | 3.3   |               |
| 446 | Q9HMR2 Q9HMR2   | 1 | 567.3996  | -1.9 | 425   | 429 | 0  | 30.4  | 17 | G | LPILL            | S | 2.9   | 6.02  |               |
| 451 | Q9HQV6 Q9HQV6   | 1 | 505.29    | -1.8 | 27    | 31  | 0  | 32.2  | 30 | L | FGLL             | L | 1.9   | 6.02  |               |
| 451 | Q9HQV6 Q9HQV6   | 1 | 731.4582  | -0.8 | 27    | 33  | 0  | 36.5  | 23 | L | FGLLLI           | P | 2.6   | 6.02  |               |
| 455 | Q9HMB8 Q9HMB8   | 1 | 543.3268  | -0.7 | 91    | 95  | 0  | 32.6  | 30 | A | IDAII            | R | 2.4   | 3.1   |               |
| 459 | Q9HNB5 Q9HNB5   | 2 | 1409.7878 | 2.3  | 339   | 352 | 0  | 23.3  | 23 | V | IDAVTAVRDALGLP   | A | 0.8   | 3.88  |               |
| 461 | Q9HNS35 Q9HNS35 | 2 | 1020.4764 | 3.4  | 193   | 202 | 0  | 29.9  | 27 | E | AFVGVVEGED       | V | 0.6   | 2.94  |               |
| 462 | Q9HNT1 ATGT     | 2 | 936.4916  | 0.6  | 59    | 66  | 0  | 28.9  | 25 | L | ITNSYIIN         | S | 0.5   | 5.92  |               |
| 465 | Q9HQB9 Q9HQB9   | 1 | 868.5382  | -0.6 | 77    | 86  | 0  | 31.9  | 23 | A | VGGAGLVLAL       | D | 2.2   | 6.02  |               |
| 468 | Q9HS08 Q9HS08   | 2 | 1471.6579 | 0.3  | 108   | 120 | 0  | 27.3  | 25 | V | YARNEDVGDYVTA    | N | -0.8  | 3.7   |               |
| 474 | Q9HPD1 RL2      | 2 | 1390.6729 | 0.1  | 60    | 71  | 0  | 41.4  | 27 | V | AFEDDDQRLVLA     | S | -0.3  | 3.5   |               |
| 480 | Q9HSI4 Q9HSI4   | 1 | 654.3377  | 0.9  | 186   | 190 | 0  | 30.0  | 22 | P | TQFLF            | E | 1.0   | 6.02  |               |
| 487 | Q9HQ91 Q9HQ91   | 1 | 584.3533  | 0.5  | 128   | 132 | 0  | 26.0  | 26 | Y | DIKPL            | Y | -0.1  | 6.76  |               |
| 487 | Q9HQ91 Q9HQ91   | 1 | 674.4367  | -1.0 | 16    | 21  | 0  | 24.6  | 21 | L | LFGLLL           | V | 2.9   | 6.02  |               |
| 490 | Q9HQZ1 Q9HQZ1   | 1 | 689.3782  | -0.3 | 45    | 51  | 0  | 31.7  | 28 | G | LASGIMV          | S | 2.1   | 6.02  |               |
| 494 | Q9HQ12 Q9HQ12   | 1 | 983.5876  | 2.2  | 49    | 56  | 0  | 23.7  | 23 | A | QRRVVDVI         | D | 0.1   | 10.88 |               |
| 497 | Q9HHQ7 Q9HHQ7   | 1 | 726.464   | -1.5 | 12    | 18  | 0  | 32.0  | 25 | T | LQALGLL          | L | 1.9   | 6.02  |               |
| 500 | Q9HRK1 Q9HRK1   | 1 | 935.4541  | 0.1  | 29    | 35  | 0  | 29.7  | 24 | A | SWWPFIT          | A | 0.3   | 6.02  |               |
| 506 | Q9HRA7 Q9HRA7   | 1 | 591.3017  | 0.5  | 19    | 24  | 0  | 25.7  | 24 | A | NAALGF           | L | 1.1   | 6.02  |               |
| 512 | Q9HNS3 Q9HNS3   | 2 | 1409.7878 | 3.1  | 95    | 107 | 0  | 24.8  | 24 | G | DIAKVVREDVGLP    | D | 0.1   | 4.3   |               |
| 517 | Q9HS50 Q9HS50   | 1 | 543.3268  | 1.5  | 235   | 239 | 0  | 30.1  | 29 | M | LDLIA            | D | 2.1   | 3.1   |               |
| 518 | Q9HMMW1 Q9HMMW1 | 1 | 543.3268  | 1.5  | 102   | 106 | 0  | 30.1  | 29 | P | DLLIA            | D | 2.1   | 3.1   |               |
| 518 | Q9HMMW1 Q9HMMW1 | 2 | 1062.5445 | -4.3 | 2     | 11  | 0  | 33.7  | 26 | M | DLTTLSETAL       | Q | 0.3   | 3     |               |
| 522 | Q9HP58 Q9HP58   | 2 | 1684.8349 | 0.5  | 21    | 35  | 0  | 36.1  | 28 | T | TPDDTLPWYVAPLPT  | R | -0.3  | 2.92  |               |
| 524 | Q9HMS0 Q9HMS0   | 1 | 703.3938  | 0.0  | 83    | 89  | 0  | 37.7  | 27 | A | MLGSALL          | F | 2.0   | 6.02  |               |
| 525 | Q9HQV1 Q9HQV1   | 1 | 684.417   | -1.6 | 44    | 50  | 0  | 30.7  | 27 | F | LQAIGIA          | S | 1.8   | 6.02  |               |
| 526 | Q9HS82 Q9HS82   | 1 | 955.4803  | -0.6 | 124   | 130 | 0  | 37.5  | 26 | T | WYNLFTL          | N | 0.6   | 5.92  |               |
| 528 | Q9HN50 SAHH     | 1 | 730.3749  | 0.1  | 392   | 397 | 0  | 40.2  | 27 | D | ELDIEI           | A | 0.4   | 2.94  |               |
| 530 | Q9HQQ6 Q9HQQ6   | 1 | 642.3952  | 1.1  | 263   | 268 | 0  | 34.1  | 24 | H | EVIALV           | A | 2.5   | 3.3   |               |
| 533 | Q9HN47 PRIL     | 3 | 1645.6898 | 1.5  | 305   | 320 | 0  | 24.2  | 22 | Y | TAPSCATMKAYGNCVN | P | 0.0   | 8.28  | Oxidation (M) |
| 537 | Q9HRJ0 Q9HRJ0   | 3 | 1525.7525 | 0.5  | 280   | 294 | 0  | 30.3  | 27 | T | VLDDAGAVPHVEHPA  | S | 0.1   | 4.28  |               |
| 541 | Q9HPS5 Q9HPS5   | 2 | 750.435   | 2.3  | 183   | 188 | 0  | 27.2  | 21 | Y | LMLYVL           | Y | 2.7   | 5.92  |               |
| 545 | Q9HPN1 Q9HPN1   | 2 | 1209.6605 | 0.1  | 171   | 182 | 0  | 24.2  | 24 | N | LAVLDENLGPVA     | R | 0.9   | 3     |               |
| 546 | O51994 O51994   | 2 | 763.4116  | 0.4  | 137   | 143 | 0  | 27.2  | 26 | D | VYADALL          | V | 1.5   | 3.1   |               |
| 551 | Q9HQ85 Q9HQ85   | 1 | 684.417   | -1.6 | 54    | 61  | 0  | 28.8  | 27 | T | GAIALGLA         | A | 2.1   | 6.02  |               |
| 553 | Q9HNS4 Q9HNS4   | 2 | 1261.6112 | 0.0  | 291   | 301 | 0  | 28.1  | 27 | E | VDMVIDELAEI      | I | 0.9   | 2.84  | Oxidation (M) |
| 556 | Q9HPP8 Q9HPP8   | 1 | 555.3632  | 0.4  | 429   | 433 | 0  | 19.4  | 18 | G | IPTII            | P | 2.2   | 6.02  |               |
| 558 | Q9HRR5 Q9HRR5   | 1 | 600.3635  | 0.5  | 60    | 64  | 0  | 26.7  | 21 | F | WVAII            | G | 2.8   | 6.02  |               |

| hit | accession     | z | mass      | ppm  | start | end | mc | score | id | - | sequence             | + | gravy | pl    | modification |
|-----|---------------|---|-----------|------|-------|-----|----|-------|----|---|----------------------|---|-------|-------|--------------|
| 558 | Q9HRR5 Q9HRR5 | 2 | 1293.6639 | -3.1 | 2     | 13  | 0  | 43.1  | 27 | M | ADEFIKGLGMLT         | G | 0.5   | 4.08  |              |
| 560 | Q9HMZ4 Y2317  | 2 | 799.4916  | 1.4  | 2     | 8   | 0  | 27.1  | 25 | M | LSVRNLV              | H | 1.0   | 11.04 |              |
| 563 | Q9HMW3 Q9HMW3 | 1 | 584.3533  | 0.5  | 62    | 66  | 0  | 26.0  | 26 | N | LDKPI                | T | -0.1  | 6.76  |              |
| 565 | Q9HRC1 Q9HRC1 | 1 | 1037.4666 | -2.7 | 111   | 121 | 0  | 26.8  | 26 | L | FVGGDGTATDV          | A | 0.3   | 2.92  |              |
| 566 | Q9HQW6 CHEB   | 1 | 555.3632  | 0.4  | 157   | 161 | 0  | 27.1  | 18 | N | PTLLI                | G | 2.0   | 6.02  |              |
| 584 | Q9HSV2 Q9HSV2 | 1 | 711.4167  | -1.5 | 241   | 247 | 0  | 27.3  | 24 | A | GDVLVLP              | S | 1.5   | 3.1   |              |
| 585 | Q9HRB9 Q9HRB9 | 1 | 626.4479  | 0.3  | 180   | 184 | 0  | 20.9  | 13 | V | LLLRL                | I | 2.1   | 11.04 |              |
| 585 | Q9HRB9 Q9HRB9 | 2 | 958.6215  | 0.8  | 175   | 182 | 0  | 16.1  | 13 | A | NKIFVLLL             | R | 1.9   | 10.1  |              |
| 586 | Q9HP54 Q9HP54 | 1 | 642.3952  | -0.5 | 208   | 213 | 0  | 27.6  | 27 | R | LLDALV               | E | 2.3   | 3.1   |              |
| 589 | Q9HRL0 Q9HRL0 | 1 | 613.3799  | -0.2 | 167   | 173 | 0  | 41.8  | 29 | A | IAAAVGL              | Q | 2.5   | 6.02  |              |
| 593 | Q9HPA3 Q9HPA3 | 1 | 685.4374  | -0.9 | 493   | 499 | 0  | 26.4  | 26 | L | ATVALIV              | L | 2.8   | 6.02  |              |
| 594 | Q9HQX0 Q9HQX0 | 1 | 609.3196  | -0.8 | 176   | 180 | 0  | 25.4  | 22 | N | VCIYI                | D | 2.9   | 5.32  |              |
| 597 | Q9HRZ2 Q9HRZ2 | 1 | 757.4698  | 4.2  | 182   | 188 | 0  | 23.0  | 22 | Q | SKLANLL              | F | 0.7   | 10.1  |              |
| 598 | Q9HMH3 Q9HMH3 | 2 | 991.5047  | -2.1 | 148   | 156 | 0  | 25.3  | 24 | R | LDTTSSRRG            | D | -1.3  | 10.88 |              |
| 599 | Q9HHG1 Q9HHG1 | 1 | 545.3213  | 0.6  | 27    | 31  | 0  | 32.2  | 24 | I | PFGLL                | V | 1.7   | 6.02  |              |
| 604 | Q9HHP9 Q9HHP9 | 1 | 515.3319  | 1.4  | 62    | 66  | 0  | 30.5  | 29 | Y | ITLAV                | V | 2.7   | 6.02  |              |
| 604 | Q9HHP9 Q9HHP9 | 1 | 555.3632  | 0.4  | 71    | 75  | 0  | 27.1  | 18 | D | TPLIL                | V | 2.0   | 6.02  |              |
| 606 | P08959 GVPA2  | 2 | 1051.4975 | -0.2 | 47    | 55  | 0  | 46.9  | 27 | A | SVDTFLHYA            | E | 0.3   | 4.94  |              |
| 616 | Q9HSG4 Q9HSG4 | 1 | 600.3635  | 0.7  | 81    | 85  | 0  | 26.6  | 21 | G | WVLIA                | G | 2.7   | 6.02  |              |
| 617 | Q9HNV3 Q9HNV3 | 1 | 726.464   | -1.7 | 74    | 80  | 0  | 28.0  | 25 | A | VVNLVAL              | S | 2.6   | 6.02  |              |
| 618 | Q9HSG2 Q9HSG2 | 1 | 753.4385  | 0.7  | 158   | 165 | 0  | 25.0  | 23 | Q | IPAVGANL             | V | 1.3   | 6.02  |              |
| 619 | O54654 O54654 | 2 | 763.4116  | 0.4  | 186   | 191 | 0  | 32.4  | 26 | Y | DLYQLL               | E | 0.5   | 3.1   |              |
| 620 | Q9HSW4 Q9HSW4 | 1 | 1012.4713 | -0.2 | 130   | 138 | 0  | 26.2  | 25 | T | DVVEKPDDP            | P | -1.4  | 3.5   |              |
| 623 | Q9HSR9 Q9HSR9 | 2 | 1035.5601 | -1.4 | 220   | 228 | 0  | 25.7  | 24 | S | KLTFTGQEI            | N | -0.2  | 6.94  |              |
| 628 | Q9HHJ7 CDC66  | 1 | 585.3737  | 1.0  | 156   | 160 | 0  | 21.0  | 20 | V | IIILD                | E | 2.8   | 3.1   |              |
| 628 | Q9HHJ7 CDC66  | 1 | 656.4221  | 2.1  | 310   | 316 | 0  | 24.6  | 19 | Q | AKAALLA              | L | 1.6   | 10.1  |              |
| 632 | Q9HPZ7 Q9HPZ7 | 1 | 532.2646  | 0.8  | 136   | 140 | 0  | 32.6  | 26 | S | GWGIT                | L | 0.4   | 6.02  |              |
| 633 | Q9HRJ5 Q9HRJ5 | 2 | 2016.0932 | -0.4 | 172   | 190 | 0  | 57.2  | 25 | A | SNGIALPLLLFLSETFVQPA | L | 0.9   | 3.3   |              |
| 635 | Q9HN45 PCNA   | 1 | 730.3749  | 0.1  | 212   | 217 | 0  | 31.6  | 27 | A | EVELEL               | G | 0.2   | 3.02  |              |
| 640 | P15756 RS12   | 2 | 1089.4615 | 0.2  | 90    | 98  | 0  | 30.1  | 25 | I | SFIDEHDEV            | T | -0.7  | 3.58  |              |
| 642 | Q9HSR5 Q9HSR5 | 1 | 727.448   | -0.4 | 4     | 10  | 0  | 27.4  | 25 | I | VAEILLA              | D | 2.3   | 3.3   |              |
| 647 | Q9HSQ2 HTPX   | 1 | 544.3221  | 0.6  | 27    | 31  | 0  | 32.8  | 32 | N | QTLA                 | I | 1.2   | 6.02  |              |
| 655 | Q9HQE5 Q9HQE5 | 1 | 765.4636  | -1.0 | 177   | 183 | 0  | 23.6  | 16 | R | VLDPLLP              | A | 1.3   | 3.1   |              |
| 660 | Q9HPQ7 Q9HPQ7 | 3 | 1157.4958 | 0.1  | 52    | 62  | 0  | 30.0  | 22 | A | SGAMNTCGVYR          | V | -0.1  | 8.9   |              |
| 664 | Q9HSK1 Q9HSK1 | 1 | 673.3799  | 0.1  | 56    | 61  | 0  | 29.0  | 26 | T | WVIGLS               | G | 1.7   | 6.02  |              |
| 665 | Q9HHX5 Q9HHX5 | 1 | 765.4636  | -1.0 | 33    | 39  | 0  | 23.6  | 16 | Y | DLLVPLP              | D | 1.3   | 3.1   |              |
| 669 | Q9HMT1 Q9HMT1 | 1 | 600.3635  | 0.7  | 31    | 35  | 0  | 26.6  | 21 | E | VWLLA                | S | 2.5   | 6.02  |              |
| 670 | Q9HQV2 Q9HQV2 | 1 | 757.4772  | -3.8 | 12    | 18  | 0  | 20.5  | 19 | V | ILALCLL              | T | 3.4   | 5.32  |              |
| 670 | Q9HQV2 Q9HQV2 | 3 | 2011.9923 | 0.6  | 40    | 56  | 0  | 35.1  | 28 | T | QLTVEDDRVQVQQDSPR    | L | -1.4  | 3.96  |              |
| 677 | Q9HQH4 Q9HQH4 | 1 | 741.4272  | 0.5  | 166   | 172 | 0  | 26.4  | 24 | V | LEPSLIA              | A | 1.1   | 3.3   |              |

| hit | accession       | z | mass      | ppm  | start | end | mc | score | id | - | sequence           | + | gravy | pl    | modification |
|-----|-----------------|---|-----------|------|-------|-----|----|-------|----|---|--------------------|---|-------|-------|--------------|
| 679 | Q9HSW8 Q9HSW8   | 1 | 714.3588  | -0.4 | 110   | 115 | 0  | 21.0  | 20 | G | YFLATT             | G | 1.0   | 5.92  |              |
| 683 | Q9HNN6 SYW2     | 1 | 612.3847  | -1.0 | 204   | 209 | 0  | 27.1  | 24 | E | TLVPIA             | V | 2.0   | 6.02  |              |
| 689 | Q9HR96 Q9HR96   | 1 | 628.416   | 1.1  | 52    | 57  | 0  | 23.4  | 23 | S | TLLAVL             | G | 2.8   | 6.02  |              |
| 707 | Q9HPT8 Q9HPT8   | 1 | 683.4218  | 0.0  | 513   | 519 | 0  | 24.9  | 24 | G | LTVGVV             | S | 2.0   | 6.02  |              |
| 712 | Q9HQ62 Q9HQ62   | 1 | 664.3068  | 4.4  | 58    | 63  | 0  | 31.0  | 29 | V | FDAVDV             | T | 1.0   | 2.92  |              |
| 719 | Q9HR47 Q9HR47   | 1 | 653.4112  | 1.2  | 193   | 198 | 0  | 36.8  | 24 | V | QIALPL             | F | 1.5   | 6.02  |              |
| 720 | Q9HSE6 Q9HSE6   | 2 | 1401.7113 | -4.7 | 310   | 322 | 0  | 29.0  | 29 | A | GETPAQRGVNFAR      | S | -0.9  | 10.88 |              |
| 730 | Q9HNG1 Y2119    | 1 | 612.3847  | 1.0  | 158   | 163 | 0  | 32.9  | 24 | A | VLTPAL             | H | 1.9   | 6.02  |              |
| 731 | Q9HS84 Q9HS84   | 2 | 1161.6798 | 0.6  | 71    | 81  | 0  | 42.4  | 21 | A | VFVGIFTVLPA        | N | 2.3   | 6.02  |              |
| 739 | Q9HPZ6 Y1401    | 1 | 555.3632  | 0.4  | 2     | 6   | 0  | 19.4  | 18 | M | PITLL              | G | 2.0   | 6.02  |              |
| 739 | Q9HPZ6 Y1401    | 1 | 686.4037  | 0.6  | 1     | 6   | 0  | 23.8  | 13 | - | MPITLL             | G | 2.0   | 6.02  |              |
| 742 | Q9HMQ2 ASSY     | 1 | 682.4238  | 2.9  | 341   | 346 | 0  | 23.2  | 20 | G | RARPIA             | R | -0.4  | 12.4  |              |
| 745 | Q9HQ19 Q9HQ19   | 1 | 782.4902  | 0.6  | 344   | 351 | 0  | 23.6  | 22 | P | PVGIITL            | I | 2.0   | 6.02  |              |
| 748 | Q9HNNW9 Q9HNNW9 | 1 | 686.4003  | 5.0  | 3     | 8   | 0  | 21.0  | 15 | V | FTPLPL             | V | 1.1   | 6.02  |              |
| 750 | Q9HS91 Q9HS91   | 1 | 727.448   | -0.4 | 69    | 75  | 0  | 27.4  | 25 | A | EAVLLIA            | A | 2.3   | 3.3   |              |
| 752 | P57697 PSMA     | 1 | 731.4582  | 0.7  | 134   | 140 | 0  | 24.3  | 23 | P | FGVALLI            | A | 2.9   | 6.02  |              |
| 753 | Q9HPR9 Q9HPR9   | 2 | 1135.5622 | -3.2 | 146   | 156 | 0  | 40.9  | 26 | E | QVVQAHADAPT        | T | -0.2  | 4.94  |              |
| 754 | Q9HQF7 Q9HQF7   | 3 | 1936.8551 | -0.4 | 51    | 67  | 0  | 26.9  | 25 | D | GLPERNDEFRRGEEGAFD | A | -1.5  | 3.82  |              |
| 762 | Q9HRL6 Q9HRL6   | 1 | 733.4374  | -1.8 | 10    | 16  | 0  | 26.7  | 25 | A | LFAALTV            | A | 2.5   | 6.02  |              |
| 769 | Q9HNN6 Y1901    | 1 | 543.3268  | 1.5  | 130   | 134 | 0  | 30.1  | 29 | T | IDIIA              | S | 2.4   | 3.1   |              |
| 773 | Q9HPR7 Q9HPR7   | 2 | 1041.5818 | -1.3 | 238   | 247 | 0  | 31.0  | 26 | H | IARDGLGVEL         | - | 0.6   | 4.08  |              |
| 774 | Q9HSQ5 Q9HSQ5   | 2 | 1187.567  | -0.7 | 42    | 53  | 0  | 28.0  | 27 | W | EVDDGGNTLGVL       | N | 0.0   | 2.88  |              |
| 776 | Q9HS66 TRPE2    | 1 | 741.4272  | -0.7 | 276   | 282 | 0  | 27.8  | 24 | A | SPELLLA            | R | 1.0   | 3.3   |              |
| 778 | Q9HHV9 Q9HHV9   | 2 | 910.5851  | 0.3  | 56    | 64  | 0  | 46.7  | 21 | L | VANLVLGLL          | L | 2.4   | 6.02  |              |
| 795 | Q9HQP0 Q9HQP0   | 3 | 943.4359  | -2.4 | 178   | 187 | 0  | 24.9  | 22 | D | AASPADADAR         | - | -0.5  | 3.88  |              |
| 805 | Q9HQJ4 RPOD     | 1 | 610.4054  | -1.5 | 67    | 72  | 0  | 25.3  | 22 | R | LGLVPL             | T | 2.3   | 6.02  |              |
| 811 | Q9HS73 Q9HS73   | 1 | 656.4109  | -0.3 | 92    | 97  | 0  | 26.2  | 26 | D | IVELIA             | G | 2.6   | 3.3   |              |
| 814 | Q9HMC5 Q9HMC5   | 1 | 668.4473  | -1.6 | 200   | 205 | 0  | 27.5  | 14 | S | LTPLLI             | N | 2.3   | 6.02  |              |
| 817 | Q9HME6 Q9HME6   | 1 | 727.448   | -0.4 | 180   | 186 | 0  | 27.4  | 25 | T | IEGLLLA            | D | 2.0   | 3.3   |              |
| 818 | Q9HSV1 Q9HSV1   | 1 | 757.4585  | 1.5  | 252   | 258 | 0  | 30.4  | 23 | N | IDILTLA            | E | 2.0   | 3.1   |              |
| 820 | Q9HSF8 PCRB     | 1 | 745.4374  | 0.5  | 98    | 104 | 0  | 27.6  | 24 | D | GYLVPVV            | L | 1.9   | 5.92  |              |
| 824 | Q9HQF5 Q9HQF5   | 1 | 724.4483  | 0.0  | 150   | 156 | 0  | 26.3  | 23 | E | LGVPLQV            | N | 1.5   | 6.02  |              |
| 828 | Q9HPN5 Q9HPN5   | 1 | 656.4109  | 1.1  | 24    | 29  | 0  | 25.3  | 21 | Q | ILVEIA             | E | 2.6   | 3.3   |              |
| 831 | Q9HQT2 Q9HQT2   | 2 | 668.3969  | 0.6  | 145   | 151 | 0  | 24.6  | 22 | S | RLAAPAA            | D | 0.7   | 11.04 |              |
| 832 | Q9HSZ9 Q9HSZ9   | 2 | 1187.567  | -1.6 | 329   | 340 | 0  | 34.3  | 27 | T | VEGGQTDVVLGD       | T | 0.0   | 2.88  |              |
| 834 | Q9HP41 Q9HP41   | 1 | 555.3996  | 1.1  | 98    | 102 | 0  | 28.5  | 20 | D | IVLIV              | D | 4.2   | 6.02  |              |
| 837 | Q9HNN1 Q9HNN1   | 2 | 672.3919  | 0.1  | 59    | 64  | 0  | 33.3  | 29 | S | RLQASV             | A | 0.2   | 11.04 |              |
| 846 | Q9HRM1 Q9HRM1   | 2 | 874.4953  | 2.7  | 75    | 81  | 0  | 22.8  | 21 | V | LIFPWTV            | I | 1.7   | 6.02  |              |
| 859 | Q9HPK2 Y1595    | 1 | 666.3588  | 1.2  | 257   | 262 | 0  | 21.0  | 21 | T | YATTVL             | N | 1.2   | 5.92  |              |
| 859 | Q9HPK2 Y1595    | 2 | 991.5049  | -2.3 | 116   | 124 | 0  | 30.5  | 24 | G | ICYVPSTPL          | G | 1.0   | 5.32  |              |

| hit  | accession     | z | mass      | ppm  | start | end | mc | score | id | - | sequence         | + | gravy | pl    | modification |
|------|---------------|---|-----------|------|-------|-----|----|-------|----|---|------------------|---|-------|-------|--------------|
| 876  | Q9HQ46 PHR    | 1 | 779.3887  | -4.4 | 57    | 63  | 0  | 25.4  | 23 | V | AFMLDAL          | A | 1.8   | 3.1   |              |
| 879  | Q9HT00 GLMS   | 1 | 906.5175  | -0.8 | 122   | 129 | 0  | 20.6  | 19 | D | TEVVPHLI         | E | 1.0   | 5.12  |              |
| 885  | Q9HMH2 Y2543  | 1 | 730.3749  | 0.1  | 129   | 134 | 0  | 40.2  | 27 | P | IEDIEL           | G | 0.4   | 2.94  |              |
| 886  | Q9HMK7 Q9HMK7 | 1 | 626.4003  | -0.2 | 145   | 150 | 0  | 35.0  | 22 | D | VTLPVPV          | D | 2.4   | 6.02  |              |
| 894  | Q9HR70 Q9HR70 | 2 | 1009.6324 | -3.5 | 141   | 149 | 0  | 23.5  | 18 | P | FHIVLVLA         | V | 2.9   | 7.84  |              |
| 906  | Q9HMH8 Q9HMH8 | 1 | 617.3207  | -3.9 | 13    | 19  | 0  | 40.8  | 27 | W | GCIAALA          | F | 2.3   | 5.32  |              |
| 919  | Q9HHU8 Q9HHU8 | 1 | 543.3268  | 1.5  | 6     | 10  | 0  | 30.1  | 29 | R | DLIIA            | G | 2.2   | 3.1   |              |
| 924  | O54605 O54605 | 1 | 600.3635  | 0.3  | 112   | 116 | 0  | 26.7  | 21 | D | LLGLW            | A | 2.0   | 6.02  |              |
| 953  | Q9HQS8 Q9HQS8 | 1 | 544.3221  | 0.6  | 163   | 167 | 0  | 32.8  | 32 | T | TQLLA            | S | 1.0   | 6.02  |              |
| 954  | Q9HHK7 Q9HHK7 | 1 | 585.3737  | 1.0  | 76    | 80  | 0  | 29.2  | 20 | S | IILD             | H | 2.6   | 3.1   |              |
| 958  | Q9HN71 Q9HN71 | 1 | 543.3268  | 1.5  | 198   | 202 | 0  | 30.1  | 29 | D | DILLA            | G | 2.1   | 3.1   |              |
| 959  | Q9HHL5 Q9HHL5 | 1 | 626.4003  | -0.2 | 171   | 176 | 0  | 23.7  | 22 | R | SLVIPV           | E | 2.4   | 6.02  |              |
| 965  | Q9HPH2 Q9HPH2 | 1 | 653.4112  | 1.1  | 369   | 374 | 0  | 26.3  | 24 | D | LQALIP           | D | 1.5   | 6.02  |              |
| 977  | Q9HQY9 Q9HQY9 | 1 | 905.595   | -0.9 | 197   | 205 | 0  | 18.3  | 13 | G | IPVLGVLPV        | E | 2.3   | 6.02  |              |
| 978  | Q9HHF3 Q9HHF3 | 1 | 745.4375  | 0.4  | 10    | 16  | 0  | 25.1  | 24 | V | PVFSVVV          | G | 2.5   | 6.02  |              |
| 985  | Q9HMH1 Q9HMH1 | 1 | 642.3952  | -1.4 | 77    | 82  | 0  | 27.0  | 27 | A | GEILIV           | G | 2.2   | 3.3   |              |
| 986  | P33963 GVPK2  | 1 | 983.5903  | -2.1 | 24    | 32  | 0  | 24.0  | 23 | T | VVELLVEAL        | E | 2.1   | 3.12  |              |
| 1009 | Q9HHZ7 Q9HHZ7 | 1 | 543.3268  | 1.5  | 246   | 250 | 0  | 30.1  | 29 | D | LDILA            | V | 2.1   | 3.1   |              |
| 1010 | Q9HSV9 Q9HSV9 | 1 | 681.4425  | -0.1 | 20    | 26  | 0  | 24.7  | 22 | A | LGPIAVI          | S | 2.4   | 6.02  |              |
| 1024 | Q9HSB5 Q9HSB5 | 1 | 706.3901  | -0.3 | 48    | 53  | 0  | 26.6  | 25 | T | LDAYIL           | A | 1.5   | 3.1   |              |
| 1027 | Q9HSG7 Q9HSG7 | 1 | 681.4425  | 0.3  | 41    | 47  | 0  | 30.4  | 22 | G | LPGLAVL          | T | 2.2   | 6.02  |              |
| 1040 | Q9HSA9 Q9HSA9 | 1 | 882.5426  | -1.1 | 170   | 177 | 0  | 31.7  | 17 | E | PETLVVLL         | V | 1.8   | 3.3   |              |
| 1041 | Q9HPH8 Q9HPH8 | 1 | 567.3996  | -1.9 | 41    | 45  | 0  | 30.4  | 17 | Y | LPLII            | M | 3.0   | 6.02  |              |
| 1060 | Q9HMD5 Q9HMD5 | 1 | 1010.6124 | 0.4  | 84    | 95  | 0  | 38.4  | 22 | P | IGVLGVGAALAA     | L | 2.2   | 6.02  |              |
| 1062 | Q9HR40 Q9HR40 | 1 | 591.3017  | -0.2 | 7     | 13  | 0  | 27.7  | 24 | V | AGGLAGF          | L | 1.3   | 6.02  |              |
| 1070 | Q9HQR3 Q9HQR3 | 1 | 690.3952  | 1.2  | 91    | 96  | 0  | 23.5  | 23 | V | VEAFLL           | A | 2.2   | 3.3   |              |
| 1076 | O54608 Y3061  | 1 | 656.4109  | 1.1  | 37    | 42  | 0  | 25.3  | 21 | E | ILEVLA           | T | 2.4   | 3.3   |              |
| 1085 | Q9HS14 Q9HS14 | 1 | 543.3268  | 1.5  | 46    | 50  | 0  | 30.1  | 29 | C | IDLLA            | L | 2.1   | 3.1   |              |
| 1090 | Q9HML3 Q9HML3 | 1 | 685.4374  | -0.7 | 157   | 163 | 0  | 26.4  | 26 | P | SALALLV          | L | 2.6   | 6.02  |              |
| 1094 | Q9HMI5 Q9HMI5 | 1 | 642.3952  | -1.4 | 66    | 71  | 0  | 27.0  | 27 | G | GIELLV           | P | 2.1   | 3.3   |              |
| 1096 | Q9HPB8 RL6    | 2 | 1211.6034 | -1.2 | 13    | 23  | 0  | 36.6  | 26 | V | TAEVDHLDLTV      | E | 0.2   | 3.7   |              |
| 1100 | Q9HR94 Q9HR94 | 1 | 757.4772  | -4.6 | 18    | 24  | 0  | 22.6  | 19 | E | MAVVLLI          | A | 3.5   | 6.02  |              |
| 1105 | Q9HPD8 Q9HPD8 | 1 | 529.286   | -0.2 | 505   | 509 | 0  | 33.1  | 27 | A | NNVLA            | D | 0.6   | 6.02  |              |
| 1107 | Q9HMF0 Q9HMF0 | 1 | 642.3952  | 1.1  | 35    | 40  | 0  | 34.1  | 24 | A | DLLAIV           | R | 2.4   | 3.1   |              |
| 1109 | Q9HMI7 Q9HMI7 | 1 | 1114.587  | -1.6 | 12    | 23  | 0  | 41.2  | 27 | V | LVGIGGADDSLV     | A | 1.1   | 2.92  |              |
| 1113 | Q9HMI1 Q9HMI1 | 1 | 771.4854  | 4.1  | 340   | 346 | 0  | 21.4  | 20 | T | TAKQVIL          | D | 0.9   | 10.1  |              |
| 1120 | P15008 RL22   | 2 | 1066.6498 | 0.0  | 24    | 33  | 0  | 21.2  | 19 | S | ISLKHSKAIA       | R | 0.4   | 10.6  |              |
| 1128 | Q9HRY0 GRPE   | 2 | 1529.6845 | -0.7 | 44    | 59  | 0  | 28.1  | 25 | R | ALDADNADALADDVAA | L | 0.2   | 2.68  |              |
| 1149 | Q9HHN6 Q9HHN6 | 1 | 789.412   | 0.3  | 51    | 57  | 0  | 31.9  | 26 | Y | EISVEIT          | G | 0.7   | 3.12  |              |
| 1153 | Q9HS42 Q9HS42 | 2 | 859.4698  | 2.6  | 71    | 77  | 0  | 22.8  | 19 | L | MRARVEV          | E | -0.1  | 10.88 |              |



| hit  | accession     | z | mass      | ppm  | start | end | mc | score | id | - | sequence         | + | gravy | pl    | modification |
|------|---------------|---|-----------|------|-------|-----|----|-------|----|---|------------------|---|-------|-------|--------------|
| 1154 | Q9HRU9 Q9HRU9 | 1 | 644.3567  | 0.3  | 37    | 42  | 0  | 24.2  | 20 | I | IPVSMV           | N | 2.1   | 6.02  |              |
| 1159 | O54646 O54646 | 1 | 656.4109  | 1.1  | 119   | 124 | 0  | 25.3  | 21 | K | IIEVIA           | Q | 2.7   | 3.3   |              |
| 1163 | Q9HMJ9 Q9HMJ9 | 1 | 973.5597  | -1.6 | 15    | 25  | 0  | 26.4  | 24 | S | VGAFVALVGAA      | T | 2.3   | 6.02  |              |
| 1167 | P15763 RS7    | 2 | 1117.6132 | 1.3  | 135   | 145 | 0  | 29.9  | 25 | L | KYGGISVPQAV      | D | 0.3   | 9.72  |              |
| 1170 | Q9HRZ7 Q9HRZ7 | 1 | 939.5753  | -0.3 | 85    | 94  | 0  | 28.0  | 22 | L | QIAGVVGLLA       | M | 2.0   | 6.02  |              |
| 1191 | P13044 GVPE1  | 1 | 690.4316  | 1.2  | 164   | 169 | 0  | 21.1  | 21 | L | LLFSLV           | L | 2.9   | 6.02  |              |
| 1193 | O52020 O52020 | 2 | 1025.5393 | 0.7  | 156   | 164 | 0  | 33.8  | 26 | R | LLVDEQVNP        | R | 0.0   | 3     |              |
| 1204 | Q9HPT5 Q9HPT5 | 1 | 676.416   | 1.3  | 5     | 10  | 0  | 23.0  | 22 | T | FVVTIV           | V | 3.2   | 6.02  |              |
| 1210 | Q9HHL1 Q9HHL1 | 1 | 674.4367  | -1.0 | 65    | 70  | 0  | 24.6  | 21 | T | GLFIIL           | G | 3.2   | 6.02  |              |
| 1216 | Q9HRK5 Q9HRK5 | 1 | 1010.6124 | -0.9 | 60    | 71  | 0  | 41.5  | 22 | C | AVGALLGVGLAA     | I | 2.2   | 6.02  |              |
| 1225 | Q9HQC2 AROC   | 1 | 851.4463  | -1.8 | 359   | 365 | 0  | 22.1  | 19 | C | TILDFML          | L | 1.8   | 3.1   |              |
| 1227 | Q9HN85 Q9HN85 | 2 | 1186.6081 | 0.4  | 256   | 267 | 0  | 29.4  | 28 | G | DATLAALAEAEI     | D | 0.8   | 2.94  |              |
| 1233 | Q9HQ04 Q9HQ04 | 1 | 726.464   | 1.1  | 154   | 161 | 0  | 26.1  | 25 | V | LAAGLVAL         | S | 2.6   | 6.02  |              |
| 1246 | Q9HPE9 RS8E   | 2 | 1592.6954 | -0.3 | 73    | 87  | 0  | 42.9  | 24 | A | TIEDVSANDANPNYA  | R | -0.8  | 2.88  |              |
| 1254 | Q9HQV5 Q9HQV5 | 1 | 584.3533  | 0.5  | 4     | 8   | 0  | 26.0  | 26 | T | DLKPI            | D | -0.1  | 6.76  |              |
| 1256 | Q9HQB8 Q9HQB8 | 2 | 1861.8694 | 0.3  | 209   | 224 | 0  | 43.8  | 27 | A | DSLQDDWATLLERETA | D | -0.9  | 3.42  |              |
| 1264 | Q9HR06 Q9HR06 | 1 | 585.3737  | 1.0  | 179   | 183 | 0  | 21.0  | 20 | D | ILLLD            | E | 2.5   | 3.1   |              |
| 1267 | Q9HMD3 Q9HMD3 | 2 | 1185.683  | 4.2  | 74    | 84  | 0  | 27.7  | 23 | G | GRVDRVVISSV      | E | 0.6   | 10.88 |              |
| 1280 | Q9HQ35 Q9HQ35 | 2 | 763.4084  | 4.6  | 1     | 6   | 0  | 27.3  | 26 | - | MTMRLI           | V | 1.0   | 11.04 |              |
| 1294 | Q9HQC3 Q9HQC3 | 1 | 681.4425  | 0.7  | 8     | 14  | 0  | 28.6  | 22 | I | GLPALVL          | G | 2.2   | 6.02  |              |
| 1298 | Q9HN39 Q9HN39 | 1 | 620.3534  | -0.3 | 111   | 116 | 0  | 28.6  | 28 | D | AFATVL           | L | 2.3   | 6.02  |              |
| 1345 | O52038 O52038 | 1 | 745.4408  | -4.0 | 1     | 7   | 0  | 25.1  | 24 | - | MVLSVVV          | V | 3.1   | 6.02  |              |
| 1363 | Q9HN99 Q9HN99 | 1 | 674.4367  | -1.0 | 63    | 68  | 0  | 24.6  | 21 | F | LFGILL           | P | 3.1   | 6.02  |              |
| 1384 | Q9HRS3 Q9HRS3 | 1 | 642.3952  | 1.1  | 32    | 37  | 0  | 34.1  | 24 | A | LDIAIV           | Y | 2.6   | 3.1   |              |
| 1402 | Q9HHH6 Q9HHH6 | 1 | 722.4367  | 0.7  | 104   | 109 | 0  | 13.5  | 13 | A | FVFVLV           | Q | 3.7   | 6.02  |              |
| 1419 | Q9HQV0 Q9HQV0 | 1 | 543.3268  | -0.7 | 52    | 56  | 0  | 32.6  | 30 | H | IDALI            | A | 2.2   | 3.1   |              |
| 1425 | Q9HSN8 Q9HSN8 | 1 | 668.4473  | -0.3 | 49    | 54  | 0  | 35.0  | 14 | L | PLLTLL           | R | 2.2   | 6.02  |              |
| 1466 | Q9HPI3 Q9HPI3 | 1 | 681.4425  | 0.9  | 100   | 105 | 0  | 26.0  | 22 | L | PLQVIL           | G | 1.9   | 6.02  |              |
| 1490 | Q9HPQ9 KITH   | 1 | 555.3632  | 0.4  | 78    | 82  | 0  | 19.4  | 18 | S | IPTLL            | N | 2.0   | 6.02  |              |
| 1548 | Q9HHS4 Q9HHS4 | 1 | 642.3952  | 1.1  | 21    | 26  | 0  | 27.5  | 24 | E | LIADLV           | E | 2.4   | 3.1   |              |
| 1588 | Q9HSE3 Q9HSE3 | 1 | 726.464   | 1.1  | 5     | 12  | 0  | 25.6  | 25 | D | ALAGIVAL         | F | 2.7   | 6.02  |              |
| 1633 | Q9HNR9 Q9HNR9 | 1 | 755.4541  | 1.3  | 19    | 26  | 0  | 26.4  | 25 | Q | ASPKIVAA         | N | 1.0   | 10.1  |              |
| 1647 | Q9HHL8 Q9HHL8 | 1 | 584.3533  | 0.5  | 23    | 27  | 0  | 26.0  | 26 | S | LDKPL            | L | -0.3  | 6.76  |              |
| 1665 | Q9V2W4 RS13   | 2 | 822.4024  | 1.8  | 80    | 86  | 0  | 22.8  | 21 | T | EHAPAWL          | A | -0.3  | 5.12  |              |
| 1668 | Q9HHG7 Q9HHG7 | 1 | 683.4694  | -0.1 | 32    | 37  | 0  | 22.7  | 19 | V | LIGLLR           | D | 1.8   | 11.04 |              |
| 1677 | Q9HM72 Q9HM72 | 1 | 666.3588  | 1.2  | 135   | 140 | 0  | 22.4  | 21 | A | SFISTL           | L | 1.5   | 6.02  |              |
| 1680 | Q9HPG0 Q9HPG0 | 1 | 830.5266  | -0.4 | 88    | 94  | 0  | 22.2  | 21 | A | FNLVILL          | A | 2.8   | 6.02  |              |
| 1707 | Q9HR95 Q9HR95 | 1 | 745.4408  | 0.9  | 91    | 97  | 0  | 21.3  | 21 | A | ITAVMLV          | A | 2.8   | 6.02  |              |

END OF LIST II

| hit                                                                                                      | accession   | z | mass      | ppm   | start | end | mc | score | id | - | sequence   | + | gravy | pI    | modification |
|----------------------------------------------------------------------------------------------------------|-------------|---|-----------|-------|-------|-----|----|-------|----|---|------------|---|-------|-------|--------------|
| <b>III. Corynebacterium glutamicum membrane; elastase digest; nLC-MALDI MS/MS; no search specificity</b> |             |   |           |       |       |     |    |       |    |   |            |   |       |       |              |
| 1                                                                                                        | P00772 ELA1 | 1 | 711.3228  | 6.2   | 189   | 194 | 0  | 36.8  | 32 | S | YWGSTV     | K | 0.0   | 5.92  |              |
| 1                                                                                                        | P00772 ELA1 | 1 | 747.3698  | 5.9   | 236   | 242 | 0  | 37.6  | 36 | V | SRLGCNV    | T | 0.2   | 9     |              |
| 1                                                                                                        | P00772 ELA1 | 1 | 752.3817  | 5.6   | 43    | 48  | 0  | 36.6  | 33 | I | SLQYRS     | G | -1.2  | 9.84  |              |
| 1                                                                                                        | P00772 ELA1 | 1 | 761.3854  | 6.0   | 237   | 243 | 0  | 45.6  | 35 | S | RLGCNVT    | R | 0.2   | 9     |              |
| 1                                                                                                        | P00772 ELA1 | 1 | 772.3868  | 8.5   | 225   | 231 | 0  | 48.4  | 36 | G | QYAVHGV    | T | 0.3   | 7.76  |              |
| 1                                                                                                        | P00772 ELA1 | 1 | 798.3548  | -7.3  | 188   | 194 | 0  | 35.3  | 31 | S | SYWGSTV    | K | -0.1  | 5.92  |              |
| 1                                                                                                        | P00772 ELA1 | 1 | 800.3851  | 6.9   | 54    | 61  | 0  | 56.0  | 34 | A | HTCGGTLI   | R | 0.7   | 7.16  |              |
| 1                                                                                                        | P00772 ELA1 | 1 | 809.3378  | 1.6   | 149   | 155 | 0  | 40.6  | 32 | A | NNSPCYI    | T | -0.5  | 5.32  |              |
| 1                                                                                                        | P00772 ELA1 | 1 | 809.4032  | 6.1   | 43    | 49  | 0  | 38.7  | 33 | I | SLQYRSG    | S | -1.1  | 9.84  |              |
| 1                                                                                                        | P00772 ELA1 | 1 | 816.3555  | 5.6   | 106   | 111 | 0  | 32.6  | 32 | V | HPYWNT     | D | -1.9  | 7.76  |              |
| 1                                                                                                        | P00772 ELA1 | 1 | 825.5072  | 6.7   | 139   | 146 | 0  | 35.0  | 30 | G | VLPRAGTI   | L | 0.9   | 11.04 |              |
| 1                                                                                                        | P00772 ELA1 | 1 | 828.4494  | -5.7  | 258   | 264 | 0  | 39.8  | 35 | S | WINNVIA    | S | 1.0   | 6.02  |              |
| 1                                                                                                        | P00772 ELA1 | 1 | 848.4174  | 11.4  | 236   | 243 | 0  | 45.0  | 36 | V | SRLGCNVT   | R | 0.1   | 9     |              |
| 1                                                                                                        | P00772 ELA1 | 1 | 873.4093  | 18.0  | 34    | 40  | 0  | 41.9  | 36 | A | QRNSWPS    | Q | -2.2  | 11.04 |              |
| 1                                                                                                        | P00772 ELA1 | 1 | 882.5287  | 9.2   | 138   | 146 | 0  | 39.7  | 30 | L | GVLPRAGTI  | L | 0.7   | 11.04 |              |
| 1                                                                                                        | P00772 ELA1 | 1 | 885.3869  | 1.7   | 187   | 194 | 0  | 63.5  | 31 | S | SSYWGSTV   | K | -0.2  | 5.92  |              |
| 1                                                                                                        | P00772 ELA1 | 1 | 890.461   | 5.1   | 156   | 163 | 0  | 51.2  | 36 | I | TGWGLTRT   | N | -0.6  | 11.04 |              |
| 1                                                                                                        | P00772 ELA1 | 1 | 896.4352  | 5.4   | 43    | 50  | 0  | 40.5  | 34 | I | SLQYRSGS   | S | -1.0  | 9.84  |              |
| 1                                                                                                        | P00772 ELA1 | 1 | 898.56    | 6.6   | 122   | 129 | 0  | 36.3  | 31 | A | LLRLAQSV   | T | 1.1   | 11.04 |              |
| 1                                                                                                        | P00772 ELA1 | 1 | 909.5396  | 12.9  | 136   | 144 | 0  | 64.3  | 29 | V | QLGVLPRAG  | T | 0.4   | 11.04 |              |
| 1                                                                                                        | P00772 ELA1 | 1 | 915.4239  | 0.1   | 105   | 111 | 0  | 43.6  | 33 | V | VHPYWNT    | D | -1.0  | 7.76  |              |
| 1                                                                                                        | P00772 ELA1 | 1 | 915.4814  | -4.2  | 257   | 264 | 0  | 54.0  | 37 | I | SWINNVIA   | S | 0.8   | 6.02  |              |
| 1                                                                                                        | P00772 ELA1 | 1 | 933.4491  | 10.1  | 62    | 68  | 0  | 52.3  | 36 | I | RQNWVMT    | A | -1.0  | 11.04 |              |
| 1                                                                                                        | P00772 ELA1 | 1 | 936.4916  | -9.9  | 130   | 137 | 0  | 49.7  | 35 | V | TLNSYVQL   | G | 0.3   | 5.92  |              |
| 1                                                                                                        | P00772 ELA1 | 1 | 940.4542  | -6.8  | 175   | 182 | 0  | 51.3  | 33 | A | YLPTVDYA   | I | 0.2   | 3.1   |              |
| 1                                                                                                        | P00772 ELA1 | 1 | 943.4512  | 5.5   | 223   | 231 | 0  | 60.3  | 35 | V | NGQYAVHGV  | T | -0.2  | 7.76  |              |
| 1                                                                                                        | P00772 ELA1 | 1 | 948.5393  | 7.8   | 243   | 250 | 0  | 34.6  | 31 | V | TRKPTVFT   | R | -0.6  | 11.48 |              |
| 1                                                                                                        | P00772 ELA1 | 1 | 972.4189  | -7.7  | 186   | 194 | 0  | 31.7  | 30 | S | SSSYWGSTV  | K | -0.3  | 5.92  |              |
| 1                                                                                                        | P00772 ELA1 | 1 | 974.4968  | 0.7   | 239   | 247 | 0  | 45.2  | 36 | L | GCVNTRKPT  | V | -1.0  | 10.1  |              |
| 1                                                                                                        | P00772 ELA1 | 1 | 993.5131  | -13.2 | 130   | 138 | 0  | 43.6  | 35 | V | TLNSYVQLG  | V | 0.2   | 5.92  |              |
| 1                                                                                                        | P00772 ELA1 | 1 | 996.4699  | 6.9   | 213   | 222 | 0  | 68.1  | 34 | G | DSGGPLHCLV | N | 0.4   | 4.94  |              |
| 1                                                                                                        | P00772 ELA1 | 1 | 1000.5665 | 8.8   | 124   | 132 | 0  | 55.3  | 35 | L | RLAQSVTLN  | S | 0.1   | 11.04 |              |
| 1                                                                                                        | P00772 ELA1 | 1 | 1004.4862 | 10.0  | 62    | 69  | 0  | 61.9  | 36 | I | RQNWVMTA   | A | -0.7  | 11.04 |              |
| 1                                                                                                        | P00772 ELA1 | 1 | 1014.4923 | 10.5  | 104   | 111 | 0  | 50.0  | 35 | I | VVHPYWNT   | D | -0.4  | 7.76  |              |
| 1                                                                                                        | P00772 ELA1 | 1 | 1029.5203 | 4.2   | 27    | 36  | 0  | 56.9  | 36 | R | VVGGTEAQRN | S | -0.6  | 6.98  |              |
| 1                                                                                                        | P00772 ELA1 | 1 | 1040.4675 | 4.0   | 45    | 53  | 0  | 44.4  | 33 | L | QYRSGSSWA  | H | -1.2  | 9.84  |              |
| 1                                                                                                        | P00772 ELA1 | 1 | 1042.4866 | 2.7   | 70    | 78  | 0  | 54.5  | 34 | A | AHCVDRELT  | F | -0.3  | 5.22  |              |

| hit | accession   | z | mass      | ppm   | start | end | mc | score | id | - | sequence      | + | gravy | pl    | modification |
|-----|-------------|---|-----------|-------|-------|-----|----|-------|----|---|---------------|---|-------|-------|--------------|
| 1   | P00772 ELA1 | 1 | 1050.5458 | 3.1   | 41    | 49  | 0  | 45.4  | 35 | S | QISLQYRSG     | S | -0.7  | 9.84  |              |
| 1   | P00772 ELA1 | 1 | 1066.6499 | 7.7   | 138   | 148 | 0  | 55.2  | 28 | L | GVLPRAGTILA   | N | 1.1   | 11.04 |              |
| 1   | P00772 ELA1 | 1 | 1087.5986 | -1.2  | 124   | 133 | 0  | 61.0  | 36 | L | RLAQSVTLNS    | Y | 0.0   | 11.04 |              |
| 1   | P00772 ELA1 | 1 | 1093.592  | 2.7   | 251   | 259 | 0  | 50.5  | 34 | T | RVSAYISWI     | N | 0.7   | 9.84  |              |
| 1   | P00772 ELA1 | 1 | 1114.5519 | 9.6   | 34    | 42  | 0  | 50.8  | 36 | A | QRNSWPSQI     | S | -1.6  | 11.04 |              |
| 1   | P00772 ELA1 | 1 | 1123.6713 | 1.7   | 136   | 146 | 0  | 49.6  | 30 | V | QLGVLPRAGTI   | L | 0.6   | 11.04 |              |
| 1   | P00772 ELA1 | 1 | 1127.5247 | 1.4   | 187   | 196 | 0  | 72.8  | 34 | S | SSYWGSTVKN    | S | -0.9  | 9.72  |              |
| 1   | P00772 ELA1 | 1 | 1133.6193 | 3.4   | 74    | 82  | 0  | 46.2  | 35 | V | DRELTFRVV     | V | -0.2  | 7.04  |              |
| 1   | P00772 ELA1 | 1 | 1145.4778 | 1.4   | 106   | 114 | 0  | 63.7  | 30 | V | HPYWNTDDV     | A | -1.6  | 3.88  |              |
| 1   | P00772 ELA1 | 1 | 1153.5516 | 2.0   | 44    | 53  | 0  | 45.3  | 35 | S | LQYRSGSSWA    | H | -0.7  | 9.84  |              |
| 1   | P00772 ELA1 | 1 | 1155.6037 | -1.0  | 221   | 231 | 0  | 75.5  | 35 | C | LVNGQYAVHGV   | T | 0.5   | 7.76  |              |
| 1   | P00772 ELA1 | 1 | 1170.5993 | -5.0  | 164   | 174 | 0  | 87.7  | 36 | T | NGQLAQLQQA    | Y | -0.7  | 6.02  |              |
| 1   | P00772 ELA1 | 1 | 1171.6713 | 3.8   | 134   | 144 | 0  | 85.0  | 34 | S | YVQLGVLPRAG   | T | 0.6   | 9.84  |              |
| 1   | P00772 ELA1 | 1 | 1206.6033 | 3.3   | 225   | 235 | 0  | 72.4  | 36 | G | QYAVHGVTSFV   | S | 0.7   | 7.76  |              |
| 1   | P00772 ELA1 | 1 | 1214.5568 | -1.2  | 187   | 197 | 0  | 84.1  | 34 | S | SSYWGSTVKNS   | M | -0.9  | 9.72  |              |
| 1   | P00772 ELA1 | 1 | 1226.7347 | 1.1   | 122   | 132 | 0  | 59.0  | 32 | A | LLRLAQSVTLN   | S | 0.7   | 11.04 |              |
| 1   | P00772 ELA1 | 1 | 1240.5836 | 15.1  | 43    | 53  | 0  | 74.4  | 35 | I | SLQYRSGSSWA   | H | -0.7  | 9.84  |              |
| 1   | P00772 ELA1 | 1 | 1244.5462 | -0.4  | 105   | 114 | 0  | 79.8  | 32 | V | VHPYWNTDDV    | A | -1.0  | 3.88  |              |
| 1   | P00772 ELA1 | 1 | 1250.6507 | -6.7  | 127   | 137 | 0  | 42.6  | 36 | A | QSVTLNSYVQL   | G | 0.2   | 5.92  |              |
| 1   | P00772 ELA1 | 1 | 1258.7034 | 12.9  | 133   | 144 | 0  | 104.9 | 34 | N | SYVQLGVLPRAG  | T | 0.4   | 9.84  |              |
| 1   | P00772 ELA1 | 1 | 1262.6659 | -9.2  | 254   | 264 | 0  | 73.2  | 36 | S | AYISWINNVIA   | S | 1.0   | 5.92  |              |
| 1   | P00772 ELA1 | 1 | 1267.6085 | -11.6 | 172   | 182 | 0  | 86.0  | 35 | L | QQAYLPTVDYA   | I | -0.3  | 3.1   |              |
| 1   | P00772 ELA1 | 1 | 1271.647  | -3.4  | 163   | 174 | 0  | 67.7  | 36 | R | TNGQLAQLQQA   | Y | -0.7  | 6.02  |              |
| 1   | P00772 ELA1 | 1 | 1287.552  | 6.2   | 106   | 116 | 0  | 75.4  | 32 | V | HPYWNTDDVAA   | G | -0.9  | 3.88  |              |
| 1   | P00772 ELA1 | 1 | 1307.7925 | -15.5 | 136   | 148 | 0  | 56.2  | 30 | V | QLGVLPRAGTILA | N | 1.0   | 11.04 |              |
| 1   | P00772 ELA1 | 1 | 1315.5833 | 0.4   | 105   | 115 | 0  | 83.5  | 33 | V | VHPYWNTDDVA   | A | -0.7  | 3.88  |              |
| 1   | P00772 ELA1 | 1 | 1321.6813 | -0.8  | 239   | 250 | 0  | 52.2  | 36 | L | GCVTRKPTVFT   | R | -0.2  | 10.1  |              |
| 1   | P00772 ELA1 | 1 | 1343.6146 | 4.3   | 104   | 114 | 0  | 75.7  | 34 | I | VVHPYWNTDDV   | A | -0.5  | 3.88  |              |
| 1   | P00772 ELA1 | 1 | 1372.7463 | 0.9   | 132   | 144 | 0  | 83.4  | 36 | L | NSYVQLGVLPRAG | T | 0.1   | 9.84  |              |
| 1   | P00772 ELA1 | 1 | 1373.7052 | -2.2  | 156   | 168 | 0  | 57.0  | 37 | I | TGWGLTRTNGQLA | Q | -0.5  | 11.04 |              |
| 1   | P00772 ELA1 | 1 | 1374.7078 | -0.5  | 57    | 68  | 0  | 44.3  | 37 | C | GGTLIRQNWVMT  | A | 0.0   | 11.04 |              |
| 1   | P00772 ELA1 | 1 | 1385.8031 | -16.5 | 134   | 146 | 0  | 81.3  | 35 | S | YVQLGVLPRAGTI | L | 0.8   | 9.84  |              |
| 1   | P00772 ELA1 | 1 | 1386.6204 | -1.4  | 105   | 116 | 0  | 101.4 | 33 | V | VHPYWNTDDVAA  | G | -0.5  | 3.88  |              |
| 1   | P00772 ELA1 | 1 | 1393.611  | 9.0   | 87    | 98  | 0  | 57.6  | 34 | H | NLNQNDGTEQYV  | G | -1.6  | 3     |              |
| 1   | P00772 ELA1 | 1 | 1414.6517 | -0.5  | 104   | 115 | 0  | 84.5  | 34 | I | VVHPYWNTDDVA  | A | -0.3  | 3.88  |              |
| 1   | P00772 ELA1 | 1 | 1417.7929 | -0.6  | 117   | 129 | 0  | 55.5  | 34 | A | GYDIALLRLAQSV | T | 0.7   | 6.7   |              |
| 1   | P00772 ELA1 | 1 | 1427.7481 | 2.3   | 162   | 174 | 0  | 109.5 | 36 | T | RTNGQLAQLQQA  | Y | -1.0  | 11.04 |              |
| 1   | P00772 ELA1 | 1 | 1443.6419 | 1.2   | 105   | 117 | 0  | 88.4  | 33 | V | VHPYWNTDDVAA  | Y | -0.5  | 3.88  |              |
| 1   | P00772 ELA1 | 1 | 1444.6657 | 2.0   | 187   | 199 | 0  | 45.1  | 35 | S | SSYWGSTVKNSMV | C | -0.3  | 9.72  |              |
| 1   | P00772 ELA1 | 1 | 1445.7449 | -0.1  | 57    | 69  | 0  | 56.5  | 37 | C | GGTLIRQNWVMTA | A | 0.1   | 11.04 |              |

| hit | accession   | z | mass      | ppm  | start | end | mc | score | id | - | sequence          | + | gravy | pl    | modification |
|-----|-------------|---|-----------|------|-------|-----|----|-------|----|---|-------------------|---|-------|-------|--------------|
| 1   | P00772 ELA1 | 1 | 1458.8195 | -0.5 | 130   | 142 | 0  | 96.8  | 35 | V | TLNSYVQLGVLPR     | A | 0.3   | 9.84  |              |
| 1   | P00772 ELA1 | 1 | 1463.7408 | 8.9  | 254   | 266 | 0  | 40.8  | 36 | S | AYISWINNVIASN     | - | 0.5   | 5.92  |              |
| 1   | P00772 ELA1 | 1 | 1472.8351 | -0.4 | 133   | 146 | 0  | 100.9 | 34 | N | SYVQLGVLPRAGTI    | L | 0.7   | 9.84  |              |
| 1   | P00772 ELA1 | 1 | 1478.6902 | 0.2  | 43    | 55  | 0  | 42.8  | 35 | I | SLQYRSGSSWAHT     | C | -0.9  | 9.84  |              |
| 1   | P00772 ELA1 | 1 | 1481.7263 | -5.1 | 41    | 53  | 0  | 45.3  | 36 | S | QISLQYRSGSSWA     | H | -0.6  | 9.84  |              |
| 1   | P00772 ELA1 | 1 | 1485.6889 | 4.2  | 104   | 116 | 0  | 89.7  | 35 | I | VVHPYWNTDDVAA     | Q | -0.2  | 3.88  |              |
| 1   | P00772 ELA1 | 1 | 1486.7165 | 1.8  | 27    | 40  | 0  | 83.0  | 36 | R | VGGTEAQRNSWPS     | Q | -0.7  | 6.98  |              |
| 1   | P00772 ELA1 | 1 | 1507.7419 | -0.3 | 37    | 49  | 0  | 43.0  | 36 | N | SWPSQISLQYRSG     | S | -0.8  | 9.84  |              |
| 1   | P00772 ELA1 | 1 | 1529.7223 | 5.0  | 29    | 42  | 0  | 69.9  | 36 | V | GGTEAQRNSWPSQI    | S | -1.3  | 6.98  |              |
| 1   | P00772 ELA1 | 1 | 1542.7103 | 5.4  | 104   | 117 | 0  | 106.1 | 35 | I | VVHPYWNTDDVAAG    | Y | -0.2  | 3.88  |              |
| 1   | P00772 ELA1 | 1 | 1543.7929 | 0.3  | 70    | 82  | 0  | 58.1  | 37 | A | AHCVDRELTFRVV     | V | 0.3   | 7.16  |              |
| 1   | P00772 ELA1 | 1 | 1549.7009 | -3.4 | 87    | 100 | 0  | 102.4 | 34 | H | NLNQNDGTEQYVGV    | Q | -1.1  | 3     |              |
| 1   | P00772 ELA1 | 1 | 1553.6706 | 1.0  | 83    | 96  | 0  | 92.2  | 32 | V | VEHNLNQNDGTEQ     | Y | -1.8  | 3.82  |              |
| 1   | P00772 ELA1 | 1 | 1559.8671 | -4.3 | 115   | 129 | 0  | 69.4  | 35 | V | AAGYDIALLRLAQSV   | T | 0.9   | 6.7   |              |
| 1   | P00772 ELA1 | 1 | 1560.6441 | 3.8  | 85    | 97  | 0  | 59.8  | 29 | G | EHNLNQNDGTEQY     | V | -2.3  | 3.82  |              |
| 1   | P00772 ELA1 | 1 | 1586.878  | 3.8  | 130   | 144 | 0  | 125.5 | 35 | V | TLNSYVQLGVLPRAG   | T | 0.3   | 9.84  |              |
| 1   | P00772 ELA1 | 1 | 1590.8729 | -2.7 | 124   | 137 | 0  | 116.6 | 35 | L | RLAQSVTLNSYVQL    | G | 0.2   | 9.84  |              |
| 1   | P00772 ELA1 | 1 | 1602.8114 | -3.2 | 156   | 170 | 0  | 46.9  | 37 | I | TGWGLTRTNGQLAQT   | L | -0.7  | 11.04 |              |
| 1   | P00772 ELA1 | 1 | 1604.8674 | 2.6  | 251   | 264 | 0  | 77.9  | 36 | T | RVSAYISWINNVIA    | S | 0.7   | 9.84  |              |
| 1   | P00772 ELA1 | 1 | 1614.83   | -2.0 | 69    | 82  | 0  | 44.7  | 37 | T | AAHCVDRELTFRVV    | V | 0.4   | 7.16  |              |
| 1   | P00772 ELA1 | 1 | 1628.7907 | -2.3 | 28    | 42  | 0  | 47.6  | 36 | V | VGGTEAQRNSWPSQI   | S | -0.9  | 6.98  |              |
| 1   | P00772 ELA1 | 1 | 1647.8944 | -4.9 | 124   | 138 | 0  | 111.4 | 36 | L | RLAQSVTLNSYVQLG   | V | 0.2   | 9.84  |              |
| 1   | P00772 ELA1 | 1 | 1652.739  | -0.2 | 82    | 96  | 0  | 118.3 | 33 | V | VVEHNLNQNDGTEQ    | Y | -1.4  | 3.82  |              |
| 1   | P00772 ELA1 | 1 | 1656.9563 | -2.5 | 133   | 148 | 0  | 80.6  | 34 | N | SYVQLGVLPRAGTILA  | N | 0.9   | 9.84  |              |
| 1   | P00772 ELA1 | 1 | 1659.7125 | -2.9 | 85    | 98  | 0  | 132.7 | 30 | G | EHNLNQNDGTEQYV    | G | -1.8  | 3.82  |              |
| 1   | P00772 ELA1 | 1 | 1677.8985 | -1.0 | 236   | 250 | 0  | 41.7  | 36 | V | SRLGCNVTRKPTVFT   | R | -0.3  | 11.32 |              |
| 1   | P00772 ELA1 | 1 | 1698.9013 | -0.5 | 159   | 174 | 0  | 107.9 | 36 | W | GLTRTNGQLAQTLLQQA | Y | -0.6  | 11.04 |              |
| 1   | P00772 ELA1 | 1 | 1705.7737 | 0.1  | 104   | 118 | 0  | 102.0 | 34 | I | VVHPYWNTDDVAAGY   | D | -0.2  | 3.88  |              |
| 1   | P00772 ELA1 | 1 | 1712.8522 | -4.1 | 101   | 114 | 0  | 105.9 | 36 | V | QKIVVHPYWNTDDV    | A | -0.6  | 5.1   |              |
| 1   | P00772 ELA1 | 1 | 1715.8955 | 8.7  | 156   | 171 | 0  | 124.3 | 37 | I | TGWGLTRTNGQLAQT   | Q | -0.4  | 11.04 |              |
| 1   | P00772 ELA1 | 1 | 1716.7339 | 0.8  | 83    | 97  | 0  | 113.1 | 31 | V | VEHNLNQNDGTEQY    | V | -1.7  | 3.82  |              |
| 1   | P00772 ELA1 | 1 | 1727.8591 | 0.8  | 27    | 42  | 0  | 104.6 | 37 | R | VGGTEAQRNSWPSQI   | S | -0.6  | 6.98  |              |
| 1   | P00772 ELA1 | 1 | 1770.9992 | -5.5 | 132   | 148 | 0  | 102.7 | 35 | L | NSYVQLGVLPRAGTILA | N | 0.7   | 9.84  |              |
| 1   | P00772 ELA1 | 1 | 1783.8893 | -0.7 | 101   | 115 | 0  | 88.5  | 37 | V | QKIVVHPYWNTDDVAA  | A | -0.4  | 5.1   |              |
| 1   | P00772 ELA1 | 1 | 1786.8607 | -3.6 | 54    | 69  | 0  | 58.4  | 36 | A | HTCGGTLIRQNWVMTA  | A | 0.0   | 9.02  |              |
| 1   | P00772 ELA1 | 1 | 1801.0098 | -0.6 | 130   | 146 | 0  | 134.4 | 35 | V | TLNSYVQLGVLPRAGTI | L | 0.5   | 9.84  |              |
| 1   | P00772 ELA1 | 1 | 1805.9424 | -4.1 | 251   | 266 | 0  | 72.9  | 37 | T | RVSAYISWINNVIASN  | - | 0.4   | 9.84  |              |
| 1   | P00772 ELA1 | 1 | 1806.7849 | 0.9  | 106   | 121 | 0  | 115.8 | 32 | V | HPYWNTDDVAAGYDIA  | L | -0.6  | 3.6   |              |
| 1   | P00772 ELA1 | 1 | 1815.8024 | 4.0  | 83    | 98  | 0  | 120.8 | 33 | V | VEHNLNQNDGTEQYV   | G | -1.4  | 3.82  |              |
| 1   | P00772 ELA1 | 1 | 1854.9265 | -2.5 | 101   | 116 | 0  | 92.7  | 37 | V | QKIVVHPYWNTDDVAA  | G | -0.3  | 5.1   |              |

| hit | accession   | z | mass      | ppm  | start | end | mc | score | id | - | sequence                  | + | gravy | pl    | modification |
|-----|-------------|---|-----------|------|-------|-----|----|-------|----|---|---------------------------|---|-------|-------|--------------|
| 1   | P00772 ELA1 | 1 | 1872.8238 | 3.3  | 84    | 100 | 0  | 115.9 | 33 | V | GEHNLNQNDGTEQYVGV         | Q | -1.3  | 3.82  |              |
| 1   | P00772 ELA1 | 1 | 1872.8238 | 0.7  | 83    | 99  | 0  | 67.2  | 32 | V | VGEHNLNQNDGTEQYVG         | V | -1.3  | 3.82  |              |
| 1   | P00772 ELA1 | 1 | 1901.0371 | -3.3 | 127   | 144 | 0  | 118.8 | 36 | A | QSVTLNSYVQLGVLPRAG        | T | 0.3   | 9.84  |              |
| 1   | P00772 ELA1 | 1 | 1905.8533 | 0.1  | 105   | 121 | 0  | 132.8 | 34 | V | VHPYWNTDDVAAGYDIA         | L | -0.3  | 3.6   |              |
| 1   | P00772 ELA1 | 1 | 1914.0938 | -5.6 | 130   | 147 | 0  | 67.6  | 34 | V | TLNSYVQLGVLPRAGTIL        | A | 0.7   | 9.84  |              |
| 1   | P00772 ELA1 | 1 | 1914.8708 | 0.1  | 82    | 98  | 0  | 156.7 | 34 | V | VGGEHNLNQNDGTEQYV         | G | -1.0  | 3.82  |              |
| 1   | P00772 ELA1 | 1 | 1927.9752 | -1.7 | 27    | 44  | 0  | 62.4  | 37 | R | VVGGTEAQRNSWPSQISL        | Q | -0.4  | 6.98  |              |
| 1   | P00772 ELA1 | 1 | 1933.8847 | -2.1 | 104   | 120 | 0  | 56.0  | 34 | I | VVHPYWNTDDVAAGYDI         | A | -0.2  | 3.6   |              |
| 1   | P00772 ELA1 | 1 | 1938.9224 | -3.1 | 37    | 53  | 0  | 86.4  | 36 | N | SWPSQISLQYRSGSSWA         | H | -0.7  | 9.84  |              |
| 1   | P00772 ELA1 | 1 | 1971.8923 | 4.1  | 83    | 100 | 0  | 147.5 | 34 | V | VGEHNLNQNDGTEQYVGV        | Q | -1.0  | 3.82  |              |
| 1   | P00772 ELA1 | 1 | 1971.8923 | -5.9 | 82    | 99  | 0  | 50.7  | 33 | V | VGGEHNLNQNDGTEQYVG        | V | -1.0  | 3.82  |              |
| 1   | P00772 ELA1 | 1 | 1985.131  | -0.8 | 130   | 148 | 0  | 118.0 | 33 | V | TLNSYVQLGVLPRAGTILA       | N | 0.8   | 9.84  |              |
| 1   | P00772 ELA1 | 1 | 2004.9218 | 24.9 | 104   | 121 | 0  | 140.4 | 37 | I | VVHPYWNTDDVAAGYDIA        | L | -0.1  | 3.6   |              |
| 1   | P00772 ELA1 | 1 | 2013.9392 | -9.5 | 81    | 98  | 0  | 35.7  | 35 | R | VVGEHNLNQNDGTEQYV         | G | -0.7  | 3.82  |              |
| 1   | P00772 ELA1 | 1 | 2022.9582 | -2.5 | 43    | 61  | 0  | 50.2  | 36 | I | SLQYRSGSSWAHTCGGTLI       | R | -0.1  | 8.9   |              |
| 1   | P00772 ELA1 | 1 | 2043.0498 | -0.6 | 156   | 174 | 0  | 159.4 | 37 | I | TGWGLTRTNGQLAQLTQQA       | Y | -0.6  | 11.04 |              |
| 1   | P00772 ELA1 | 1 | 2070.9607 | 12.8 | 82    | 100 | 0  | 174.0 | 36 | V | VGGEHNLNQNDGTEQYVGV       | Q | -0.7  | 3.82  |              |
| 1   | P00772 ELA1 | 1 | 2099.9508 | -1.6 | 83    | 101 | 0  | 145.8 | 34 | V | VGEHNLNQNDGTEQYVGVQ       | K | -1.1  | 3.82  |              |
| 1   | P00772 ELA1 | 1 | 2115.1688 | -8.6 | 127   | 146 | 0  | 126.1 | 36 | A | QSVTLNSYVQLGVLPRAGTI      | L | 0.4   | 9.84  |              |
| 1   | P00772 ELA1 | 1 | 2170.0291 | 1.8  | 81    | 100 | 0  | 121.4 | 36 | R | VVGEHNLNQNDGTEQYVGV       | Q | -0.5  | 3.82  |              |
| 1   | P00772 ELA1 | 1 | 2185.04   | 1.9  | 85    | 103 | 0  | 154.7 | 37 | G | EHNLNQNDGTEQYVGVQKI       | V | -1.3  | 4.42  |              |
| 1   | P00772 ELA1 | 1 | 2186.2059 | -4.6 | 126   | 146 | 0  | 80.9  | 36 | L | AQSVTLNSYVQLGVLPRAGTI     | L | 0.5   | 9.84  |              |
| 1   | P00772 ELA1 | 1 | 2199.0193 | -3.2 | 82    | 101 | 0  | 150.9 | 35 | V | VGGEHNLNQNDGTEQYVGVQ      | K | -0.9  | 3.82  |              |
| 1   | P00772 ELA1 | 1 | 2231.0899 | 3.8  | 104   | 123 | 0  | 104.0 | 37 | I | VVHPYWNTDDVAAGYDIALL      | R | 0.3   | 3.6   |              |
| 1   | P00772 ELA1 | 1 | 2241.2593 | -9.6 | 124   | 144 | 0  | 151.2 | 35 | L | RLAQSVTLNSYVQLGVLPRAG     | T | 0.3   | 11.14 |              |
| 1   | P00772 ELA1 | 1 | 2299.29   | -4.0 | 127   | 148 | 0  | 116.1 | 35 | A | QSVTLNSYVQLGVLPRAGTILA    | N | 0.6   | 9.84  |              |
| 1   | P00772 ELA1 | 1 | 2317.1087 | 6.6  | 79    | 98  | 0  | 119.2 | 37 | T | FRVVGEHNLNQNDGTEQYV       | G | -0.8  | 4.42  |              |
| 1   | P00772 ELA1 | 1 | 2341.1299 | 8.1  | 83    | 103 | 0  | 187.3 | 37 | V | VGEHNLNQNDGTEQYVGVQKI     | V | -1.0  | 4.42  |              |
| 1   | P00772 ELA1 | 1 | 2370.3271 | -4.4 | 126   | 148 | 0  | 98.1  | 35 | L | AQSVTLNSYVQLGVLPRAGTILA   | N | 0.7   | 9.84  |              |
| 1   | P00772 ELA1 | 1 | 2374.1594 | 3.5  | 101   | 121 | 0  | 156.0 | 37 | V | QKIVVHPYWNTDDVAAGYDIA     | L | -0.2  | 4.16  |              |
| 1   | P00772 ELA1 | 1 | 2440.1983 | -1.2 | 82    | 103 | 0  | 198.5 | 37 | V | VGGEHNLNQNDGTEQYVGVQKI    | V | -0.8  | 4.42  |              |
| 1   | P00772 ELA1 | 1 | 2455.3911 | -7.0 | 124   | 146 | 0  | 124.0 | 35 | L | RLAQSVTLNSYVQLGVLPRAGTI   | L | 0.4   | 11.14 |              |
| 1   | P00772 ELA1 | 1 | 2467.4275 | -3.1 | 122   | 144 | 0  | 95.3  | 32 | A | LLRLAQSVTLNSYVQLGVLPRAG   | T | 0.6   | 11.14 |              |
| 1   | P00772 ELA1 | 1 | 2473.1986 | -4.6 | 79    | 100 | 0  | 142.6 | 37 | T | FRVVGEHNLNQNDGTEQYVGV     | Q | -0.5  | 4.42  |              |
| 1   | P00772 ELA1 | 1 | 2519.2517 | -3.0 | 27    | 49  | 0  | 91.7  | 38 | R | VVGGTEAQRNSWPSQISLQYRSG   | S | -0.7  | 9.84  |              |
| 1   | P00772 ELA1 | 1 | 2574.2463 | -5.3 | 78    | 100 | 0  | 88.0  | 37 | L | TFRVVGEHNLNQNDGTEQYVGV    | Q | -0.5  | 4.42  |              |
| 1   | P00772 ELA1 | 1 | 2606.2837 | -0.2 | 27    | 50  | 0  | 106.0 | 38 | R | VVGGTEAQRNSWPSQISLQYRSGS  | S | -0.7  | 9.84  |              |
| 1   | P00772 ELA1 | 1 | 2639.5123 | -6.0 | 124   | 148 | 0  | 139.9 | 34 | L | RLAQSVTLNSYVQLGVLPRAGTILA | N | 0.6   | 11.14 |              |
| 1   | P00772 ELA1 | 1 | 2681.5592 | -4.7 | 122   | 146 | 0  | 93.6  | 32 | A | LLRLAQSVTLNSYVQLGVLPRAGTI | L | 0.7   | 11.14 |              |
| 1   | P00772 ELA1 | 1 | 2842.4362 | -3.1 | 79    | 103 | 0  | 52.5  | 38 | T | FRVVGEHNLNQNDGTEQYVGVQKI  | V | -0.6  | 5.34  |              |

| hit | accession   | z | mass      | ppm   | start | end | mc | score | id | - | sequence                         | + | gravy | pl    | modification |
|-----|-------------|---|-----------|-------|-------|-----|----|-------|----|---|----------------------------------|---|-------|-------|--------------|
| 1   | P00772 ELA1 | 1 | 2865.6804 | -8.2  | 122   | 148 | 0  | 83.9  | 32 | A | LLRLAQSVTLNSYVQLGVLPRAGTILA      | N | 0.8   | 11.14 |              |
| 1   | P00772 ELA1 | 1 | 2885.4712 | -3.3  | 104   | 129 | 0  | 139.0 | 38 | I | VVHPYWNTDDVAAGYDIALLRQAQSV       | T | 0.3   | 4.16  |              |
| 1   | P00772 ELA1 | 1 | 2950.4322 | -7.1  | 27    | 53  | 0  | 47.8  | 37 | R | VVGGTEAQRNSWPSQISLQYRSGSSWA      | H | -0.7  | 9.84  |              |
| 1   | P00772 ELA1 | 1 | 3128.7346 | -12.4 | 115   | 144 | 0  | 71.8  | 37 | V | AAGYDIALLRQAQSVTLNSYVQLGVLPRAG   | T | 0.6   | 9.58  |              |
| 1   | P00772 ELA1 | 1 | 3200.7921 | -3.5  | 117   | 146 | 0  | 76.3  | 35 | A | GYDIALLRQAQSVTLNSYVQLGVLPRAGTI   | L | 0.6   | 9.58  |              |
| 1   | P00772 ELA1 | 1 | 3254.7088 | -1.1  | 101   | 129 | 0  | 59.6  | 38 | V | QKIVVHPYWNTDDVAAGYDIALLRQAQSV    | T | 0.2   | 5.2   |              |
| 1   | P00772 ELA1 | 1 | 3342.8663 | -8.6  | 115   | 146 | 0  | 67.1  | 36 | V | AAGYDIALLRQAQSVTLNSYVQLGVLPRAGTI | L | 0.7   | 9.58  |              |
| 1   | P00772 ELA1 | 1 | 3384.9133 | 1.6   | 117   | 148 | 0  | 43.2  | 33 | A | GYDIALLRQAQSVTLNSYVQLGVLPRAGTILA | N | 0.8   | 9.58  |              |
| 1   | P00772 ELA1 | 1 | 3666.7339 | -10.1 | 83    | 114 | 0  | 62.8  | 36 | V | VGEHNLNQNDGTEQYVGVQKIVVHPYWNTDDV | A | -0.8  | 4.2   |              |
| 2   | Cg0446      | 1 | 772.4119  | 8.7   | 487   | 493 | 0  | 52.5  | 37 | I | PNYLGPL                          | L | -0.1  | 5.92  |              |
| 2   | Cg0446      | 1 | 819.3763  | 9.8   | 647   | 654 | 0  | 52.8  | 35 | E | PGENGTFFV                        | R | -0.4  | 3.3   |              |
| 2   | Cg0446      | 1 | 820.3504  | 8.9   | 457   | 463 | 0  | 39.2  | 34 | A | SWTYHGA                          | N | -0.8  | 7.76  |              |
| 2   | Cg0446      | 1 | 888.4494  | 3.6   | 292   | 298 | 0  | 51.3  | 37 | S | FIQFHPT                          | G | 0.2   | 7.84  |              |
| 2   | Cg0446      | 1 | 935.4825  | 3.3   | 171   | 179 | 0  | 73.6  | 35 | T | RSFGGVQVS                        | R | 0.1   | 11.04 |              |
| 2   | Cg0446      | 1 | 942.5175  | 7.5   | 487   | 495 | 0  | 56.7  | 36 | I | PNYLGPLL                         | S | 0.3   | 5.92  |              |
| 2   | Cg0446      | 1 | 944.4352  | 3.0   | 182   | 189 | 0  | 35.3  | 34 | T | YYTRGQTG                         | Q | -1.6  | 9.58  |              |
| 2   | Cg0446      | 1 | 966.4559  | 3.3   | 159   | 167 | 0  | 40.2  | 35 | A | PFAREYGGA                        | L | -0.6  | 6.88  |              |
| 2   | Cg0446      | 1 | 987.4596  | 7.4   | 521   | 528 | 0  | 41.4  | 35 | L | MGNRPEWV                         | G | -1.0  | 6.98  |              |
| 2   | Cg0446      | 1 | 993.5396  | -7.0  | 9     | 16  | 0  | 41.8  | 34 | T | RPEFIHPV                         | S | -0.4  | 7.84  |              |
| 2   | Cg0446      | 1 | 994.5236  | -2.7  | 294   | 302 | 0  | 37.1  | 34 | I | QFHPTGLPV                        | N | 0.0   | 7.84  |              |
| 2   | Cg0446      | 1 | 1036.5302 | 3.2   | 170   | 179 | 0  | 49.3  | 35 | A | TRSGGVQVS                        | R | 0.0   | 11.04 |              |
| 2   | Cg0446      | 1 | 1045.4577 | 3.2   | 115   | 123 | 0  | 45.5  | 32 | V | DNDGAYRHV                        | K | -1.5  | 5.1   |              |
| 2   | Cg0446      | 1 | 1066.5335 | -7.1  | 661   | 669 | 0  | 53.4  | 35 | L | FFESVPLQT                        | R | 0.4   | 3.3   |              |
| 2   | Cg0446      | 1 | 1094.5145 | 7.4   | 157   | 167 | 0  | 61.1  | 35 | I | GAPFAREYGGA                      | L | -0.4  | 6.88  |              |
| 2   | Cg0446      | 1 | 1094.5873 | 0.1   | 8     | 16  | 0  | 46.4  | 34 | T | TRPEFIHPV                        | S | -0.4  | 7.84  |              |
| 2   | Cg0446      | 1 | 1095.5673 | -4.9  | 372   | 383 | 0  | 83.0  | 35 | I | NAGLGVGPLNNA                     | A | 0.2   | 6.02  |              |
| 2   | Cg0446      | 1 | 1110.5418 | 2.1   | 98    | 109 | 0  | 111.9 | 35 | A | HSIAAQGGVNSA                     | R | 0.1   | 7.84  |              |
| 2   | Cg0446      | 1 | 1134.5921 | -1.8  | 77    | 87  | 0  | 49.7  | 36 | A | ALGELGYDVKA                      | F | 0.2   | 4.08  |              |
| 2   | Cg0446      | 1 | 1184.4921 | 4.3   | 256   | 266 | 0  | 64.1  | 30 | A | TGGYGNVYHMS                      | T | -0.5  | 7.7   |              |
| 2   | Cg0446      | 1 | 1205.5353 | -6.3  | 644   | 654 | 0  | 61.1  | 33 | S | AWEPGENGTFFV                     | R | -0.5  | 3.12  |              |
| 2   | Cg0446      | 1 | 1207.5986 | 2.0   | 156   | 167 | 0  | 83.6  | 36 | A | IGAPFAREYGGA                     | L | 0.0   | 6.88  |              |
| 2   | Cg0446      | 1 | 1216.6815 | -2.3  | 489   | 499 | 0  | 69.3  | 35 | N | YLGPLLGSERL                      | S | 0.2   | 6.88  |              |
| 2   | Cg0446      | 1 | 1223.5757 | 3.7   | 569   | 577 | 0  | 39.6  | 35 | A | LRDDFWKNM                        | R | -1.3  | 6.9   |              |
| 2   | Cg0446      | 1 | 1232.605  | 1.8   | 88    | 97  | 0  | 50.4  | 37 | A | FTYHDAPRRA                       | H | -1.3  | 9.84  |              |
| 2   | Cg0446      | 1 | 1254.6761 | -1.3  | 292   | 302 | 0  | 84.2  | 35 | S | FIQFHPTGLPV                      | N | 0.6   | 7.84  |              |
| 2   | Cg0446      | 1 | 1285.5397 | 2.0   | 256   | 267 | 0  | 76.7  | 30 | A | TGGYGNVYHMST                     | L | -0.6  | 7.7   |              |
| 2   | Cg0446      | 1 | 1292.5673 | -3.9  | 643   | 654 | 0  | 94.8  | 33 | V | SAWEPGENGTFFV                    | R | -0.5  | 3.12  |              |
| 2   | Cg0446      | 1 | 1298.6156 | -8.2  | 533   | 542 | 0  | 53.3  | 34 | V | HGPEYYHRQL                       | G | -1.9  | 7.84  |              |
| 2   | Cg0446      | 1 | 1313.6364 | 1.6   | 182   | 192 | 0  | 82.7  | 35 | T | YYTRGQTGQQL                      | Q | -1.5  | 9.58  |              |
| 2   | Cg0446      | 1 | 1355.6371 | 5.8   | 533   | 543 | 0  | 42.7  | 35 | V | HGPEYYHRQLG                      | D | -1.7  | 7.84  |              |

| hit | accession | z | mass      | ppm   | start | end | mc | score | id | - | sequence                  | + | gravy | pl    | modification  |
|-----|-----------|---|-----------|-------|-------|-----|----|-------|----|---|---------------------------|---|-------|-------|---------------|
| 2   | Cg0446    | 1 | 1368.6132 | -3.5  | 254   | 266 | 0  | 52.4  | 33 | I | LATGGYGNVYHMS             | T | 0.0   | 7.7   |               |
| 2   | Cg0446    | 1 | 1372.6194 | 1.7   | 521   | 532 | 0  | 63.6  | 34 | L | MGNRPEWVGDNV              | H | -1.0  | 4.08  |               |
| 2   | Cg0446    | 1 | 1381.6918 | -1.9  | 475   | 486 | 0  | 76.8  | 36 | A | SVDGWFTLPFTI              | P | 0.8   | 3.1   |               |
| 2   | Cg0446    | 1 | 1397.6939 | -9.3  | 385   | 395 | 0  | 44.3  | 36 | A | YLDFRDATERL               | G | -0.8  | 4.3   |               |
| 2   | Cg0446    | 1 | 1400.6896 | -0.1  | 551   | 563 | 0  | 57.3  | 36 | C | GVS RNVEDLQDGI            | N | -0.5  | 3.7   |               |
| 2   | Cg0446    | 1 | 1427.7772 | -8.3  | 487   | 499 | 0  | 50.3  | 36 | I | PNYLGPLLGSERL             | S | -0.2  | 6.88  |               |
| 2   | Cg0446    | 1 | 1450.7139 | 4.7   | 567   | 577 | 0  | 44.4  | 36 | I | RALRDDFWKNM               | R | -1.3  | 10.08 |               |
| 2   | Cg0446    | 1 | 1455.6188 | -6.1  | 581   | 593 | 0  | 48.4  | 30 | T | GSTDEMNVQVLEYA            | A | -0.7  | 2.94  |               |
| 2   | Cg0446    | 1 | 1468.731  | -1.8  | 384   | 395 | 0  | 55.8  | 36 | A | AYLDFRDATERL              | G | -0.6  | 4.3   |               |
| 2   | Cg0446    | 1 | 1469.6609 | 13.4  | 254   | 267 | 0  | 64.3  | 34 | I | LATGGYGNVYHMST            | L | -0.1  | 7.7   |               |
| 2   | Cg0446    | 1 | 1469.6609 | -23.1 | 256   | 269 | 0  | 39.4  | 31 | A | TGGYGNVYHMSTLA            | K | -0.1  | 7.7   |               |
| 2   | Cg0446    | 1 | 1492.7609 | 2.2   | 569   | 579 | 0  | 65.0  | 36 | A | LRDDFWKNMRI               | T | -1.0  | 10.08 |               |
| 2   | Cg0446    | 1 | 1509.638  | -5.2  | 39    | 49  | 0  | 80.8  | 29 | T | KDMWEYQKDHM               | N | -2.1  | 5.28  |               |
| 2   | Cg0446    | 1 | 1526.6386 | -1.4  | 620   | 632 | 0  | 41.5  | 30 | A | HFRDDHLSDEGEA             | E | -1.6  | 4.2   |               |
| 2   | Cg0446    | 1 | 1540.8038 | -0.1  | 655   | 667 | 0  | 85.3  | 36 | V | RHAEP LFFESVPL            | Q | 0.0   | 5.3   |               |
| 2   | Cg0446    | 1 | 1593.8086 | -1.1  | 569   | 580 | 0  | 54.8  | 36 | A | LRDDFWKNMRIT              | G | -1.0  | 10.08 |               |
| 2   | Cg0446    | 1 | 1641.8111 | 0.7   | 182   | 195 | 0  | 106.8 | 36 | T | YYTRGQTGQQQLQS            | T | -1.2  | 9.58  |               |
| 2   | Cg0446    | 1 | 1653.7821 | -0.4  | 254   | 269 | 0  | 72.4  | 35 | I | LATGGYGNVYHMSTLA          | K | 0.3   | 7.7   |               |
| 2   | Cg0446    | 1 | 1673.8121 | -1.1  | 115   | 129 | 0  | 89.3  | 36 | V | DNDGAYRHVKD TVKG          | G | -1.5  | 7.72  |               |
| 2   | Cg0446    | 1 | 1696.8321 | 0.1   | 533   | 546 | 0  | 78.2  | 36 | V | HGPEYYHRQLGDIL            | Y | -1.0  | 6.02  |               |
| 2   | Cg0446    | 1 | 1724.8832 | -18.3 | 17    | 34  | 0  | 52.9  | 37 | V | SVLPEVSAGTVLDAAEPA        | G | 0.6   | 2.94  |               |
| 2   | Cg0446    | 1 | 1730.8336 | -2.1  | 115   | 130 | 0  | 91.7  | 36 | V | DNDGAYRHVKD TVKGG         | D | -1.4  | 7.72  |               |
| 2   | Cg0446    | 1 | 1736.8482 | -4.0  | 2     | 16  | 0  | 61.8  | 36 | M | STHSETTRPEFIHPV           | S | -0.9  | 6.02  |               |
| 2   | Cg0446    | 1 | 1756.8315 | 3.5   | 518   | 532 | 0  | 46.0  | 36 | I | DRLMGNRPEWVGDNV           | H | -1.0  | 4.3   |               |
| 2   | Cg0446    | 1 | 1767.8639 | 0.6   | 491   | 507 | 0  | 49.5  | 37 | L | GPLLGSERLSEDAPEAQ         | A | -0.7  | 3.68  |               |
| 2   | Cg0446    | 1 | 1769.9101 | 0.2   | 655   | 669 | 0  | 79.5  | 37 | V | RHAEP LFFESVPLQT          | R | -0.2  | 5.3   |               |
| 2   | Cg0446    | 1 | 1835.8335 | 1.9   | 39    | 52  | 0  | 37.1  | 35 | T | KDMWEYQKDHMNLV            | S | -1.4  | 5.28  |               |
| 2   | Cg0446    | 1 | 1938.951  | -20.2 | 205   | 221 | 0  | 66.4  | 36 | I | HLGSVEIFTHNEMVDVI         | V | 0.5   | 4.4   |               |
| 2   | Cg0446    | 1 | 1954.9173 | -2.8  | 339   | 353 | 0  | 38.8  | 35 | I | PEDERDYFLERRYPA           | F | -1.9  | 4.28  |               |
| 2   | Cg0446    | 1 | 1968.9078 | -3.3  | 529   | 545 | 0  | 41.5  | 35 | V | GDNVHGPEYYHRQLGDI         | L | -1.3  | 5.12  |               |
| 2   | Cg0446    | 1 | 2044.0113 | 14.7  | 489   | 507 | 0  | 87.2  | 38 | N | YLGPLLGSERLSEDAPEAQ       | A | -0.5  | 3.68  |               |
| 2   | Cg0446    | 1 | 2081.9919 | -6.2  | 529   | 546 | 0  | 77.7  | 36 | V | GDNVHGPEYYHRQLGDIL        | Y | -1.0  | 5.12  |               |
| 2   | Cg0446    | 1 | 2133.0023 | 1.5   | 39    | 55  | 0  | 77.6  | 36 | T | KDMWEYQKDHMNLVSP          | N | -1.0  | 5.28  |               |
| 2   | Cg0446    | 1 | 2144.0585 | -0.5  | 148   | 167 | 0  | 50.4  | 37 | V | RVIDHMNAIGAPFAREYGGA      | L | -0.1  | 7.76  |               |
| 2   | Cg0446    | 1 | 2255.1069 | -5.9  | 487   | 507 | 0  | 82.1  | 37 | I | PNYLGPLLGSERLSEDAPEAQ     | A | -0.7  | 3.68  |               |
| 2   | Cg0446    | 1 | 2349.1866 | -0.6  | 77    | 97  | 0  | 113.9 | 38 | A | ALGELGYDVKAFTYHDAPRRA     | H | -0.5  | 7.68  |               |
| 2   | Cg0446    | 1 | 2418.0025 | 0.1   | 598   | 619 | 0  | 29.3  | 27 | A | DYIDLGELMCVDALDRDESCGA    | H | -0.1  | 3.22  | Oxidation (M) |
| 2   | Cg0446    | 1 | 2420.2237 | -1.5  | 76    | 97  | 0  | 60.0  | 38 | A | AALGELGYDVKAFTYHDAPRRA    | H | -0.4  | 7.68  |               |
| 2   | Cg0446    | 1 | 2605.3581 | -4.9  | 477   | 499 | 0  | 58.3  | 38 | V | DGWFTLPFTIPNYLGPLLGSERL   | S | 0.2   | 4.08  |               |
| 2   | Cg0446    | 1 | 2791.4585 | 0.3   | 475   | 499 | 0  | 111.3 | 38 | A | SVDGWFTLPFTIPNYLGPLLGSERL | S | 0.3   | 4.08  |               |

| hit | accession | z | mass      | ppm   | start | end | mc | score | id | - | sequence                          | + | gravy | pl    | modification  |
|-----|-----------|---|-----------|-------|-------|-----|----|-------|----|---|-----------------------------------|---|-------|-------|---------------|
| 2   | Cg0446    | 1 | 3618.7882 | -1.6  | 475   | 507 | 0  | 40.9  | 39 | A | SVDGWFTLPFTIPNYLGPLLGSERLSEDAPEAQ | A | -0.2  | 3.5   |               |
| 3   | Cg1537    | 1 | 721.3911  | -1.1  | 320   | 325 | 0  | 33.9  | 33 | L | GLHWPL                            | N | 0.3   | 7.84  |               |
| 3   | Cg1537    | 1 | 775.4302  | -3.0  | 220   | 226 | 0  | 43.3  | 34 | V | FGLPMVL                           | N | 2.1   | 6.02  |               |
| 3   | Cg1537    | 1 | 798.4316  | -9.0  | 173   | 178 | 0  | 38.4  | 33 | V | FYFLPI                            | M | 1.8   | 5.92  |               |
| 3   | Cg1537    | 1 | 832.4331  | 22.9  | 205   | 212 | 0  | 41.7  | 35 | T | PEFLALGS                          | A | 0.7   | 3.3   |               |
| 3   | Cg1537    | 1 | 862.4953  | 7.8   | 277   | 284 | 0  | 60.6  | 32 | A | FLLGPFPG                          | G | 1.9   | 6.02  |               |
| 3   | Cg1537    | 1 | 864.4858  | 3.0   | 403   | 409 | 0  | 45.7  | 31 | T | YFRLLPG                           | C | 0.4   | 9.84  |               |
| 3   | Cg1537    | 1 | 902.5113  | -5.4  | 201   | 208 | 0  | 58.6  | 35 | A | ALLTPEFL                          | A | 1.3   | 3.3   |               |
| 3   | Cg1537    | 1 | 941.4494  | -7.4  | 334   | 341 | 0  | 45.7  | 34 | I | NTLGYDFI                          | Q | 0.2   | 3.1   |               |
| 3   | Cg1537    | 1 | 950.4862  | 2.9   | 242   | 249 | 0  | 53.3  | 35 | I | GLYWVEKG                          | L | -0.3  | 6.86  |               |
| 3   | Cg1537    | 1 | 950.4862  | 0.0   | 298   | 305 | 0  | 63.2  | 35 | I | NNFSPFIL                          | S | 0.6   | 6.02  |               |
| 3   | Cg1537    | 1 | 960.5684  | -5.0  | 312   | 319 | 0  | 47.5  | 32 | L | LYPFLVPL                          | G | 1.7   | 5.92  |               |
| 3   | Cg1537    | 1 | 975.5463  | -7.9  | 218   | 226 | 0  | 47.5  | 34 | V | TVFGLPMVL                         | N | 2.0   | 6.02  |               |
| 3   | Cg1537    | 1 | 991.5413  | -2.3  | 218   | 226 | 0  | 54.5  | 34 | V | TVFGLPMVL                         | N | 2.0   | 6.02  | Oxidation (M) |
| 3   | Cg1537    | 1 | 1018.5852 | -4.0  | 277   | 286 | 0  | 60.0  | 33 | A | FLLGPFGIGV                        | G | 1.9   | 6.02  |               |
| 3   | Cg1537    | 1 | 1019.5552 | 7.0   | 320   | 328 | 0  | 53.7  | 34 | L | GLHWPLNAI                         | M | 0.5   | 7.84  |               |
| 3   | Cg1537    | 1 | 1100.5365 | -2.7  | 259   | 267 | 0  | 55.3  | 35 | V | QMVFPFFS                          | L | 1.4   | 6.02  |               |
| 3   | Cg1537    | 1 | 1113.6394 | 1.4   | 591   | 600 | 0  | 43.4  | 34 | A | LRLDSGVEIL                        | V | 0.7   | 4.08  |               |
| 3   | Cg1537    | 1 | 1134.6073 | 1.9   | 240   | 249 | 0  | 71.1  | 35 | A | AIGLYWVEKG                        | L | 0.4   | 6.86  |               |
| 3   | Cg1537    | 1 | 1143.6539 | -11.4 | 201   | 211 | 0  | 47.9  | 35 | A | ALLTPEFLALG                       | S | 1.4   | 3.3   |               |
| 3   | Cg1537    | 1 | 1154.5067 | -4.0  | 337   | 347 | 0  | 88.8  | 32 | L | GYDFIQGPMGA                       | W | 0.0   | 3.1   |               |
| 3   | Cg1537    | 1 | 1182.6284 | -1.7  | 74    | 82  | 0  | 55.2  | 35 | A | NYYQEILKL                         | D | -0.5  | 6.8   |               |
| 3   | Cg1537    | 1 | 1213.6567 | -3.8  | 186   | 196 | 0  | 87.4  | 36 | A | RKLGANEWIGA                       | A | -0.5  | 10.08 |               |
| 3   | Cg1537    | 1 | 1230.686  | -7.9  | 201   | 212 | 0  | 76.6  | 35 | A | ALLTPEFLALGS                      | A | 1.2   | 3.3   |               |
| 3   | Cg1537    | 1 | 1237.7394 | -0.5  | 640   | 650 | 0  | 61.9  | 31 | I | RSKDLPLITPV                       | V | 0.0   | 10.08 |               |
| 3   | Cg1537    | 1 | 1322.6394 | -4.3  | 628   | 639 | 0  | 63.8  | 36 | A | GDPLITFDADFI                      | R | 0.6   | 2.82  |               |
| 3   | Cg1537    | 1 | 1336.8231 | 1.1   | 392   | 402 | 0  | 31.1  | 27 | S | LYGVLLRFKKT                       | Y | 0.3   | 10.7  |               |
| 3   | Cg1537    | 1 | 1359.7551 | -1.5  | 277   | 290 | 0  | 63.7  | 35 | A | FLLGPFGIGVGNGI                    | S | 1.4   | 6.02  |               |
| 3   | Cg1537    | 1 | 1370.6871 | -2.6  | 116   | 126 | 0  | 76.8  | 36 | A | FEFLSDTFRPI                       | L | 0.2   | 4.08  |               |
| 3   | Cg1537    | 1 | 1373.6827 | -10.6 | 657   | 669 | 0  | 50.1  | 36 | A | KFGEIEGIPADQA                     | N | -0.4  | 3.82  |               |
| 3   | Cg1537    | 1 | 1382.5698 | 1.8   | 463   | 473 | 0  | 73.5  | 30 | L | DYRSNEERDEA                       | R | -2.8  | 3.92  |               |
| 3   | Cg1537    | 1 | 1396.6445 | -0.1  | 144   | 155 | 0  | 42.4  | 34 | A | DTFGLQDFRAPM                      | D | -0.4  | 3.88  |               |
| 3   | Cg1537    | 1 | 1418.7154 | -4.1  | 10    | 22  | 0  | 88.1  | 37 | S | QHILENLGGPDNI                     | T | -0.5  | 4.06  |               |
| 3   | Cg1537    | 1 | 1419.7034 | -3.4  | 227   | 239 | 0  | 70.8  | 37 | L | NDYSGQVFPPLIA                     | A | 0.1   | 3.1   |               |
| 3   | Cg1537    | 1 | 1439.8136 | -2.8  | 553   | 567 | 0  | 114.0 | 34 | I | FAAGKLGPGIAIQPT                   | G | 0.6   | 10.1  |               |
| 3   | Cg1537    | 1 | 1482.6813 | -8.0  | 334   | 347 | 0  | 42.9  | 34 | I | NTLGYDFIQGPMGA                    | W | 0.0   | 3.1   |               |
| 3   | Cg1537    | 1 | 1495.6539 | -0.6  | 462   | 473 | 0  | 65.1  | 33 | A | LDYRSNEERDEA                      | R | -2.2  | 3.92  |               |
| 3   | Cg1537    | 1 | 1505.7474 | -1.7  | 9     | 22  | 0  | 95.2  | 37 | T | SQHILENLGGPDNI                    | T | -0.5  | 4.06  |               |
| 3   | Cg1537    | 1 | 1673.8876 | 1.6   | 201   | 217 | 0  | 139.5 | 37 | A | ALLTPEFLALGSAGDTV                 | T | 0.9   | 3     |               |
| 3   | Cg1537    | 1 | 1693.8271 | -4.0  | 9     | 24  | 0  | 84.7  | 36 | T | SQHILENLGGPDNITS                  | M | -0.6  | 4.06  |               |



| hit | accession | z | mass      | ppm   | start | end | mc | score | id | - | sequence                  | + | gravy | pl   | modification  |
|-----|-----------|---|-----------|-------|-------|-----|----|-------|----|---|---------------------------|---|-------|------|---------------|
| 3   | Cg1537    | 1 | 1719.8144 | 3.3   | 113   | 126 | 0  | 60.9  | 36 | I | DYAFEFLSDTFRPI            | L | -0.1  | 3.7  |               |
| 3   | Cg1537    | 1 | 1772.0236 | 1.2   | 244   | 258 | 0  | 103.8 | 32 | L | YWVEKGLKKIPEAV            | Q | 0.0   | 9.56 |               |
| 3   | Cg1537    | 1 | 1793.8777 | -4.4  | 106   | 119 | 0  | 38.2  | 36 | V | RGKYSWIDYAFEF             | S | -0.3  | 6.88 |               |
| 3   | Cg1537    | 1 | 1806.0139 | 0.8   | 528   | 545 | 0  | 129.0 | 34 | A | AGEVVDIVSPLEGKAIPL        | S | 0.8   | 3.82 |               |
| 3   | Cg1537    | 1 | 1810.7832 | -1.0  | 149   | 163 | 0  | 57.6  | 31 | L | QDFRAPMDEQPDTYV           | F | -1.3  | 3.5  |               |
| 3   | Cg1537    | 1 | 1810.9941 | -8.1  | 553   | 571 | 0  | 54.8  | 36 | I | FAAGKLGPGIAIQPTGNTV       | V | 0.4   | 10.1 |               |
| 3   | Cg1537    | 1 | 1831.9428 | -4.1  | 33    | 47  | 0  | 104.5 | 37 | L | RFQVKDQSIVDQQEI           | D | -0.9  | 4.3  |               |
| 3   | Cg1537    | 1 | 1939.0024 | -7.3  | 609   | 625 | 0  | 46.2  | 37 | V | QLGGEGFTVHVRRQQV          | K | -0.7  | 7.86 |               |
| 3   | Cg1537    | 1 | 1942.1291 | -6.9  | 242   | 258 | 0  | 89.6  | 33 | I | GLYWVEKGLKKIPEAV          | Q | 0.2   | 9.56 |               |
| 3   | Cg1537    | 1 | 1980.8524 | 1.1   | 144   | 160 | 0  | 84.8  | 31 | A | DTFGLQDFRAPMDEQPD         | T | -1.2  | 3.36 |               |
| 3   | Cg1537    | 1 | 2076.0375 | -1.6  | 657   | 676 | 0  | 141.1 | 37 | A | KFGEIEGIPADQANSSTTVI      | K | -0.1  | 3.82 |               |
| 3   | Cg1537    | 1 | 2126.2503 | 2.4   | 240   | 258 | 0  | 90.6  | 30 | A | AIGLYWVEKGLKKIPEAV        | Q | 0.5   | 9.56 |               |
| 3   | Cg1537    | 1 | 2149.1895 | -4.2  | 553   | 575 | 0  | 79.5  | 35 | I | FAAGKLGPGIAIQPTGNTVVAPA   | D | 0.6   | 10.1 |               |
| 3   | Cg1537    | 1 | 2244.9634 | 3.2   | 144   | 162 | 0  | 44.5  | 31 | A | DTFGLQDFRAPMDEQPDTY       | V | -1.2  | 3.36 |               |
| 3   | Cg1537    | 1 | 2333.1135 | -0.1  | 33    | 52  | 0  | 88.9  | 37 | L | RFQVKDQSIVDQQEIDSDPS      | V | -1.2  | 3.76 |               |
| 3   | Cg1537    | 1 | 2344.0318 | 6.5   | 144   | 163 | 0  | 124.8 | 33 | A | DTFGLQDFRAPMDEQPDTYV      | F | -0.9  | 3.36 |               |
| 3   | Cg1537    | 1 | 2360.0267 | -9.4  | 144   | 163 | 0  | 51.7  | 29 | A | DTFGLQDFRAPMDEQPDTYV      | F | -0.9  | 3.36 | Oxidation (M) |
| 3   | Cg1537    | 1 | 2528.153  | -5.1  | 142   | 163 | 0  | 60.1  | 34 | V | LADTFGLQDFRAPMDEQPDTYV    | F | -0.6  | 3.36 |               |
| 3   | Cg1537    | 1 | 2543.3734 | 2.8   | 528   | 552 | 0  | 82.2  | 36 | A | AGEVVDIVSPLEGKAIPLSEVPDPI | F | 0.5   | 3.5  |               |
| 3   | Cg1537    | 1 | 2604.1843 | -4.3  | 144   | 165 | 0  | 91.8  | 34 | A | DTFGLQDFRAPMDEQPDTYVFL    | H | -0.5  | 3.36 |               |
| 3   | Cg1537    | 1 | 2658.2271 | 6.3   | 74    | 96  | 0  | 78.7  | 36 | A | NYYQEILKLDGMKHFADGEATES   | S | -0.9  | 4.28 |               |
| 3   | Cg1537    | 1 | 2828.2752 | -11.5 | 144   | 167 | 0  | 35.3  | 32 | A | DTFGLQDFRAPMDEQPDTYVFLHS  | M | -0.6  | 3.76 |               |
| 4   | Cg2705    | 1 | 921.4596  | -0.8  | 338   | 344 | 0  | 35.9  | 35 | T | KDFVDWL                   | F | -0.1  | 3.88 |               |
| 4   | Cg2705    | 1 | 975.4662  | -0.6  | 38    | 45  | 0  | 49.2  | 36 | L | NFKPEQDV                  | A | -1.6  | 4.08 |               |
| 4   | Cg2705    | 1 | 1159.6237 | -1.3  | 418   | 427 | 0  | 49.9  | 36 | A | SGKWKWEDVV                | K | -0.5  | 6.98 |               |
| 4   | Cg2705    | 1 | 1163.4996 | 1.7   | 199   | 207 | 0  | 35.6  | 33 | T | SGEDWRWQT                 | H | -2.1  | 4.08 |               |
| 4   | Cg2705    | 1 | 1222.6234 | -3.6  | 356   | 366 | 0  | 62.5  | 35 | V | KDLGFIAPFES               | Y | 0.2   | 4.08 |               |
| 4   | Cg2705    | 1 | 1318.6081 | 3.5   | 143   | 152 | 0  | 69.8  | 35 | I | IYNDEIFDKY                | I | -0.9  | 3.7  |               |
| 4   | Cg2705    | 1 | 1339.6078 | -1.3  | 260   | 272 | 0  | 78.7  | 34 | T | VSDSMAEFAQGKA             | A | -0.2  | 4.08 |               |
| 4   | Cg2705    | 1 | 1389.6452 | -2.2  | 144   | 154 | 0  | 86.8  | 35 | I | YNDEIFDKYIA               | T | -0.6  | 3.7  |               |
| 4   | Cg2705    | 1 | 1426.6365 | 2.7   | 403   | 414 | 0  | 111.2 | 33 | S | QQFKDDFGQDLS              | Q | -1.4  | 3.6  |               |
| 4   | Cg2705    | 1 | 1464.6634 | -0.5  | 196   | 207 | 0  | 65.2  | 34 | T | SLTSGEDWRWQT              | H | -1.4  | 4.08 |               |
| 4   | Cg2705    | 1 | 1464.6885 | 1.9   | 333   | 344 | 0  | 58.6  | 36 | V | DQQATKDFVDWL              | F | -0.9  | 3.6  |               |
| 4   | Cg2705    | 1 | 1484.6797 | 0.8   | 199   | 210 | 0  | 69.2  | 34 | T | SGEDWRWQTHLA              | N | -1.4  | 5.22 |               |
| 4   | Cg2705    | 1 | 1490.6929 | -1.2  | 144   | 155 | 0  | 88.5  | 35 | I | YNDEIFDKYIAT              | S | -0.6  | 3.7  |               |
| 4   | Cg2705    | 1 | 1496.642  | 3.4   | 215   | 226 | 0  | 65.4  | 32 | I | WQEYQDKGVEDT              | N | -2.0  | 3.58 |               |
| 4   | Cg2705    | 1 | 1502.7293 | 1.5   | 143   | 154 | 0  | 86.2  | 37 | I | IYNDEIFDKYIA              | T | -0.2  | 3.7  |               |
| 4   | Cg2705    | 1 | 1574.7113 | 1.0   | 428   | 440 | 0  | 110.0 | 34 | V | KHFNDNWAAEKES             | N | -1.8  | 5.34 |               |
| 4   | Cg2705    | 1 | 1603.777  | -14.5 | 143   | 155 | 0  | 103.3 | 36 | I | IYNDEIFDKYIAT             | S | -0.2  | 3.7  |               |
| 4   | Cg2705    | 1 | 1747.7901 | 0.1   | 367   | 382 | 0  | 104.7 | 34 | S | YTAENTPNDPLSEQVA          | E | -1.0  | 2.94 |               |

| hit | accession | z | mass      | ppm   | start | end | mc | score | id | - | sequence                        | + | gravy | pl   | modification |
|-----|-----------|---|-----------|-------|-------|-----|----|-------|----|---|---------------------------------|---|-------|------|--------------|
| 4   | Cg2705    | 1 | 1785.8434 | -8.3  | 196   | 210 | 0  | 51.1  | 35 | T | SLTSGEDWRWQTHLA                 | N | -0.9  | 5.22 |              |
| 4   | Cg2705    | 1 | 1852.8115 | 4.3   | 215   | 229 | 0  | 123.5 | 33 | I | WQEYQDKGVEDTNEI                 | E | -1.8  | 3.5  |              |
| 4   | Cg2705    | 1 | 1871.9781 | -3.2  | 350   | 366 | 0  | 71.3  | 37 | A | GKEHVVKDLGFIAPFES               | Y | 0.0   | 5.34 |              |
| 4   | Cg2705    | 1 | 1891.8588 | 1.4   | 211   | 226 | 0  | 110.2 | 35 | A | NAPIWQEYQDKGVEDT                | N | -1.4  | 3.58 |              |
| 4   | Cg2705    | 1 | 1964.9519 | 7.8   | 233   | 247 | 0  | 96.7  | 37 | S | YNKEYKNLFDLYLEN                 | S | -1.2  | 4.44 |              |
| 4   | Cg2705    | 1 | 1973.9232 | 0.3   | 194   | 210 | 0  | 96.3  | 36 | A | STSLTSGEDWRWQTHLA               | N | -0.9  | 5.22 |              |
| 4   | Cg2705    | 1 | 2003.9849 | -3.2  | 299   | 315 | 0  | 38.4  | 37 | I | KFLPMYMGLPDEEKHGI               | N | -0.5  | 5.34 |              |
| 4   | Cg2705    | 1 | 2051.984  | -0.1  | 233   | 248 | 0  | 137.3 | 37 | S | YNKEYKNLFDLYLENS                | T | -1.2  | 4.44 |              |
| 4   | Cg2705    | 1 | 2056.9953 | -13.6 | 117   | 135 | 0  | 46.4  | 36 | L | TDDIPPLTTEDGEVRGVFP             | A | -0.5  | 3.42 |              |
| 4   | Cg2705    | 1 | 2090.9738 | 0.3   | 386   | 402 | 0  | 89.6  | 36 | I | ANKDLTTYPWNFQYFPS               | Q | -0.9  | 6.62 |              |
| 4   | Cg2705    | 1 | 2107.015  | -2.6  | 138   | 155 | 0  | 84.8  | 36 | V | EGFGIYNDEIFDKYIAT               | S | 0.0   | 3.58 |              |
| 4   | Cg2705    | 1 | 2140.0437 | 5.5   | 306   | 325 | 0  | 83.9  | 37 | M | GLPDEEKHGINVGTENYLG             | N | -0.6  | 4.16 |              |
| 4   | Cg2705    | 1 | 2153.0316 | 8.5   | 233   | 249 | 0  | 77.8  | 37 | S | YNKEYKNLFDLYLENST               | V | -1.2  | 4.44 |              |
| 4   | Cg2705    | 1 | 2182.1118 | -14.5 | 114   | 133 | 0  | 116.6 | 37 | A | KQLTDDIPPLTTEDGEVRGV            | P | -0.8  | 3.84 |              |
| 4   | Cg2705    | 1 | 2194.047  | 1.3   | 138   | 156 | 0  | 99.7  | 37 | V | EGFGIYNDEIFDKYIATS              | G | 0.0   | 3.58 |              |
| 4   | Cg2705    | 1 | 2215.9546 | 12.2  | 215   | 232 | 0  | 85.8  | 33 | I | WQEYQDKGVEDTNEIEFS              | Y | -1.6  | 3.44 |              |
| 4   | Cg2705    | 1 | 2227.1009 | 0.6   | 117   | 137 | 0  | 98.0  | 37 | L | TDDIPPLTTEDGEVRGVFPF            | E | -0.2  | 3.42 |              |
| 4   | Cg2705    | 1 | 2248.0284 | 0.9   | 211   | 229 | 0  | 94.1  | 35 | A | NAPIWQEYQDKGVEDTNEI             | E | -1.3  | 3.5  |              |
| 4   | Cg2705    | 1 | 2252.1001 | -5.2  | 233   | 250 | 0  | 155.5 | 37 | S | YNKEYKNLFDLYLENSTV              | E | -0.9  | 4.44 |              |
| 4   | Cg2705    | 1 | 2426.2329 | -4.0  | 114   | 135 | 0  | 148.5 | 38 | A | KQLTDDIPPLTTEDGEVRGVFP          | A | -0.6  | 3.84 |              |
| 4   | Cg2705    | 1 | 2596.2696 | 4.4   | 233   | 253 | 0  | 120.1 | 38 | S | YNKEYKNLFDLYLENSTVEKS           | L | -1.1  | 4.64 |              |
| 4   | Cg2705    | 1 | 2596.3385 | 2.1   | 114   | 137 | 0  | 136.9 | 38 | A | KQLTDDIPPLTTEDGEVRGVFPF         | E | -0.3  | 3.84 |              |
| 4   | Cg2705    | 1 | 2611.1714 | 7.2   | 211   | 232 | 0  | 138.7 | 35 | A | NAPIWQEYQDKGVEDTNEIEFS          | Y | -1.2  | 3.44 |              |
| 4   | Cg2705    | 1 | 2615.2431 | 6.4   | 230   | 250 | 0  | 75.6  | 37 | I | EFYNKEYKNLFDLYLENSTV            | E | -0.8  | 4.16 |              |
| 4   | Cg2705    | 1 | 2679.3425 | -9.0  | 168   | 191 | 0  | 95.9  | 38 | T | SYQKLKEVAEDMQAKKDELGIEGA        | F | -1.0  | 4.44 |              |
| 4   | Cg2705    | 1 | 2780.3902 | 2.8   | 167   | 191 | 0  | 104.7 | 38 | I | TSYQKLKEVAEDMQAKKDELGIEGA       | F | -0.9  | 4.44 |              |
| 4   | Cg2705    | 1 | 3050.4881 | 0.7   | 299   | 325 | 0  | 64.5  | 38 | I | KFLPMYMGLPDEEKHGINVGTENYLG      | N | -0.3  | 4.62 |              |
| 4   | Cg2705    | 1 | 3453.7184 | -18.5 | 161   | 191 | 0  | 45.1  | 37 | I | KSTDEITSYQKLKEVAEDMQAKKDELGIEGA | F | -1.0  | 4.34 |              |
| 5   | Cg2409    | 1 | 802.4225  | 4.2   | 232   | 238 | 0  | 63.3  | 37 | T | PIEFNLA                         | S | 0.6   | 3.3  |              |
| 5   | Cg2409    | 1 | 930.4382  | 7.8   | 43    | 50  | 0  | 39.4  | 35 | L | RMGWPDGI                        | T | -0.6  | 6.78 |              |
| 5   | Cg2409    | 1 | 936.4745  | 0.1   | 246   | 252 | 0  | 41.4  | 35 | S | FWVPEFL                         | F | 1.1   | 3.3  |              |
| 5   | Cg2409    | 1 | 1017.5131 | -10.3 | 230   | 238 | 0  | 62.7  | 36 | V | NTPIEFNLA                       | S | 0.0   | 3.3  |              |
| 5   | Cg2409    | 1 | 1114.4931 | -1.4  | 304   | 312 | 0  | 41.2  | 32 | V | DRDSFAEYI                       | S | -0.9  | 3.7  |              |
| 5   | Cg2409    | 1 | 1135.5121 | 8.6   | 40    | 48  | 0  | 37.5  | 35 | G | DFLRMGWPD                       | G | -0.7  | 3.88 |              |
| 5   | Cg2409    | 1 | 1137.5675 | 5.7   | 295   | 303 | 0  | 57.2  | 35 | A | MMNFELRVV                       | D | 0.8   | 6.98 |              |
| 5   | Cg2409    | 1 | 1160.5655 | 6.3   | 244   | 252 | 0  | 67.8  | 36 | A | HSFWVPEFL                       | F | 0.4   | 5.12 |              |
| 5   | Cg2409    | 1 | 1198.556  | -1.2  | 150   | 158 | 0  | 61.4  | 34 | T | AYQWNWKFG                       | Y | -1.1  | 9.72 |              |
| 5   | Cg2409    | 1 | 1257.5812 | 2.5   | 43    | 53  | 0  | 36.0  | 34 | L | RMGWPDGITPE                     | A | -1.0  | 4.08 |              |
| 5   | Cg2409    | 1 | 1296.6714 | 1.2   | 207   | 216 | 0  | 52.7  | 35 | S | YLEFNRIETL                      | G | -0.2  | 4.26 |              |
| 5   | Cg2409    | 1 | 1303.6309 | 2.1   | 253   | 263 | 0  | 53.3  | 36 | L | FKRDAYAHP                       | N | -1.2  | 7.74 |              |

| hit | accession | z | mass      | ppm  | start | end | mc | score | id | - | sequence                         | + | gravy | pl   | modification |
|-----|-----------|---|-----------|------|-------|-----|----|-------|----|---|----------------------------------|---|-------|------|--------------|
| 5   | Cg2409    | 1 | 1305.6176 | -2.4 | 40    | 50  | 0  | 60.6  | 36 | G | DFLRMGWPDGI                      | T | -0.2  | 3.88 |              |
| 5   | Cg2409    | 1 | 1305.6176 | 2.5  | 38    | 48  | 0  | 74.1  | 36 | V | LGDFLRMGWPD                      | G | -0.2  | 3.88 |              |
| 5   | Cg2409    | 1 | 1383.7034 | -0.2 | 206   | 216 | 0  | 60.2  | 36 | V | SYLEFNRIETL                      | G | -0.3  | 4.26 |              |
| 5   | Cg2409    | 1 | 1397.6939 | -1.9 | 325   | 337 | 0  | 125.5 | 36 | A | QALEHIGQAPYAT                    | S | -0.3  | 5.12 |              |
| 5   | Cg2409    | 1 | 1416.7361 | 4.3  | 92    | 103 | 0  | 73.1  | 37 | A | EKRGEFEFPKQL                     | Q | -1.8  | 7.16 |              |
| 5   | Cg2409    | 1 | 1417.6738 | 0.3  | 253   | 264 | 0  | 82.0  | 36 | L | FKRDAYAHPEAN                     | K | -1.4  | 7.74 |              |
| 5   | Cg2409    | 1 | 1427.6867 | -3.8 | 43    | 55  | 0  | 95.0  | 35 | L | RMGWPDGITPEAV                    | A | -0.4  | 4.08 |              |
| 5   | Cg2409    | 1 | 1449.612  | 5.9  | 170   | 182 | 0  | 45.3  | 31 | G | GQDYQGSDPERQA                    | A | -2.2  | 3.7  |              |
| 5   | Cg2409    | 1 | 1553.8031 | -6.2 | 246   | 257 | 0  | 45.5  | 36 | S | FWVPEFLFKRDA                     | Y | 0.0   | 7.02 |              |
| 5   | Cg2409    | 1 | 1576.7733 | -1.6 | 267   | 279 | 0  | 94.0  | 37 | S | QRFVQIEEITEEG                    | A | -0.8  | 3.8  |              |
| 5   | Cg2409    | 1 | 1582.7739 | -1.8 | 323   | 337 | 0  | 131.8 | 36 | T | NAQALEHIGQAPYAT                  | S | -0.4  | 5.12 |              |
| 5   | Cg2409    | 1 | 1597.7988 | -7.0 | 204   | 216 | 0  | 84.6  | 36 | S | DVSYLEFNRIETL                    | G | -0.2  | 3.82 |              |
| 5   | Cg2409    | 1 | 1632.8008 | -2.7 | 253   | 266 | 0  | 74.9  | 37 | L | FKRDAYAHPEANKS                   | Q | -1.5  | 9.62 |              |
| 5   | Cg2409    | 1 | 1647.8104 | 0.1  | 267   | 280 | 0  | 94.2  | 37 | S | QRFVQIEEITEEGA                   | F | -0.6  | 3.8  |              |
| 5   | Cg2409    | 1 | 1690.778  | 0.7  | 150   | 162 | 0  | 95.0  | 35 | T | AYQWNWKFYSEI                     | D | -0.8  | 6.8  |              |
| 5   | Cg2409    | 1 | 1716.7703 | -2.3 | 166   | 181 | 0  | 47.5  | 33 | S | LAPGGQDYQGSDPERQ                 | A | -1.7  | 3.7  |              |
| 5   | Cg2409    | 1 | 1766.8547 | -4.6 | 187   | 203 | 0  | 71.3  | 36 | A | SKKDPGSDNPIHGNSKS                | D | -1.9  | 9.76 |              |
| 5   | Cg2409    | 1 | 1787.8074 | -0.7 | 166   | 182 | 0  | 106.0 | 34 | S | LAPGGQDYQGSDPERQA                | A | -1.4  | 3.7  |              |
| 5   | Cg2409    | 1 | 1802.8662 | -5.4 | 40    | 55  | 0  | 105.1 | 36 | G | DFLRMGWPDGITPEAV                 | A | -0.1  | 3.7  |              |
| 5   | Cg2409    | 1 | 1832.9156 | -8.0 | 209   | 224 | 0  | 42.7  | 37 | L | EFNRIETLGTDEIPV                  | M | -0.4  | 3.68 |              |
| 5   | Cg2409    | 1 | 1859.8876 | -2.6 | 39    | 55  | 0  | 45.9  | 36 | L | GDFLRMGWPDGITPEAV                | A | -0.1  | 3.7  |              |
| 5   | Cg2409    | 1 | 1874.8395 | -6.6 | 165   | 182 | 0  | 70.9  | 32 | G | SLAPGGQDYQGSDPERQA               | A | -1.4  | 3.7  |              |
| 5   | Cg2409    | 1 | 1949.8584 | 5.0  | 150   | 165 | 0  | 98.2  | 33 | T | AYQWNWKFYSEIDGS                  | L | -1.0  | 4.08 |              |
| 5   | Cg2409    | 1 | 1972.9717 | -2.5 | 38    | 55  | 0  | 69.4  | 37 | V | LGDFLRMGWPDGITPEAV               | A | 0.1   | 3.7  |              |
| 5   | Cg2409    | 1 | 1975.8508 | -0.4 | 163   | 181 | 0  | 76.2  | 31 | I | DGSLAPGGQDYQGSDPERQ              | A | -1.6  | 3.5  |              |
| 5   | Cg2409    | 1 | 2046.8879 | -1.5 | 163   | 182 | 0  | 141.0 | 31 | I | DGSLAPGGQDYQGSDPERQA             | A | -1.5  | 3.5  |              |
| 5   | Cg2409    | 1 | 2109.063  | -1.3 | 207   | 224 | 0  | 92.7  | 37 | S | YLEFNRIETLGTDEIPV                | M | -0.2  | 3.68 |              |
| 5   | Cg2409    | 1 | 2129.9614 | -0.1 | 166   | 186 | 0  | 66.4  | 34 | S | LAPGGQDYQGSDPERQAAAEA            | S | -1.1  | 3.58 |              |
| 5   | Cg2409    | 1 | 2196.095  | 1.2  | 206   | 224 | 0  | 78.8  | 37 | V | SYLEFNRIETLGTDEIPV               | M | -0.2  | 3.68 |              |
| 5   | Cg2409    | 1 | 2336.1378 | -4.1 | 246   | 264 | 0  | 63.9  | 37 | S | FWVPEFLFKRDAYAHPEAN              | K | -0.5  | 5.34 |              |
| 5   | Cg2409    | 1 | 2340.0578 | -1.4 | 338   | 359 | 0  | 41.8  | 34 | T | STSPFVSDRTATRDGENTQSNA           | - | -1.2  | 4.3  |              |
| 5   | Cg2409    | 1 | 2389.0418 | 1.5  | 163   | 186 | 0  | 74.8  | 32 | I | DGSLAPGGQDYQGSDPERQAAAEA         | S | -1.1  | 3.42 |              |
| 5   | Cg2409    | 1 | 2410.1904 | -0.3 | 204   | 224 | 0  | 92.6  | 37 | S | DVSYLEFNRIETLGTDEIPV             | M | -0.2  | 3.5  |              |
| 5   | Cg2409    | 1 | 2539.1099 | 0.5  | 159   | 182 | 0  | 153.5 | 32 | G | YSEIDGSLAPGGQDYQGSDPERQA         | A | -1.3  | 3.42 |              |
| 5   | Cg2409    | 1 | 3719.6553 | -7.6 | 150   | 182 | 0  | 71.7  | 31 | T | AYQWNWKFYSEIDGSLAPGGQDYQGSDPERQA | A | -1.2  | 3.84 |              |
| 6   | Cg0587    | 1 | 739.4592  | -5.4 | 293   | 299 | 0  | 32.5  | 29 | G | QVIVKPG                          | A | 0.5   | 10.1 |              |
| 6   | Cg0587    | 1 | 817.4446  | 9.3  | 126   | 132 | 0  | 41.3  | 35 | A | RQVGVPY                          | I | -0.4  | 9.84 |              |
| 6   | Cg0587    | 1 | 833.4072  | 6.8  | 333   | 338 | 0  | 46.1  | 36 | Q | FYFRTT                           | D | -0.3  | 9.84 |              |
| 6   | Cg0587    | 1 | 938.4246  | 1.1  | 326   | 332 | 0  | 40.3  | 34 | F | FDNYRPQ                          | F | -2.2  | 6.7  |              |
| 6   | Cg0587    | 1 | 1008.4698 | 1.3  | 370   | 378 | 0  | 43.1  | 35 | V | AMDEGLRFA                        | I | 0.0   | 4.08 |              |

| hit | accession | z | mass      | ppm   | start | end | mc | score | id | - | sequence                 | + | gravy | pl    | modification  |
|-----|-----------|---|-----------|-------|-------|-----|----|-------|----|---|--------------------------|---|-------|-------|---------------|
| 6   | Cg0587    | 1 | 1043.6128 | 1.0   | 126   | 134 | 0  | 47.3  | 34 | A | RQVGVPYIL                | V | 0.6   | 9.84  |               |
| 6   | Cg0587    | 1 | 1142.6812 | 11.7  | 126   | 135 | 0  | 84.8  | 31 | A | RQVGVPYILV               | A | 1.0   | 9.84  |               |
| 6   | Cg0587    | 1 | 1166.488  | 5.0   | 301   | 310 | 0  | 45.2  | 32 | A | YTPHTEFEFGS              | V | -1.3  | 4.24  |               |
| 6   | Cg0587    | 1 | 1182.5458 | -4.7  | 324   | 332 | 0  | 53.6  | 34 | T | PPFDNYRPQ                | F | -1.5  | 6.7   |               |
| 6   | Cg0587    | 1 | 1237.5251 | -0.9  | 300   | 310 | 0  | 58.9  | 31 | G | AYTPHTEFEFGS             | V | -1.0  | 4.24  |               |
| 6   | Cg0587    | 1 | 1323.6207 | 2.3   | 71    | 80  | 0  | 50.1  | 35 | V | EYQTEKRHYA               | H | -2.4  | 7.68  |               |
| 6   | Cg0587    | 1 | 1345.7064 | 1.3   | 206   | 216 | 0  | 57.7  | 36 | V | RETDKPFLMPI              | E | -0.6  | 7.02  |               |
| 6   | Cg0587    | 1 | 1361.7013 | 0.1   | 206   | 216 | 0  | 48.1  | 37 | V | RETDKPFLMPI              | E | -0.6  | 7.02  | Oxidation (M) |
| 6   | Cg0587    | 1 | 1367.7673 | -1.9  | 5     | 15  | 0  | 51.6  | 34 | A | KFERTKPHVNI              | G | -1.2  | 10.58 |               |
| 6   | Cg0587    | 1 | 1378.7278 | 1.7   | 260   | 271 | 0  | 82.3  | 35 | T | GIEMFRKLLDSA             | E | 0.2   | 7.02  |               |
| 6   | Cg0587    | 1 | 1479.7755 | 0.9   | 259   | 271 | 0  | 66.3  | 36 | V | TGIEMFRKLLDSA            | E | 0.1   | 7.02  |               |
| 6   | Cg0587    | 1 | 1598.7253 | -0.6  | 300   | 313 | 0  | 73.6  | 34 | G | AYTPHTEFEFGSVYV          | L | -0.3  | 4.24  |               |
| 6   | Cg0587    | 1 | 1646.7801 | 1.2   | 68    | 80  | 0  | 80.3  | 36 | I | SHVEYQTEKRHYA            | H | -1.8  | 7.84  |               |
| 6   | Cg0587    | 1 | 1677.8688 | 0.7   | 209   | 222 | 0  | 90.8  | 37 | T | DKPFLMPIEDIFTI           | T | 0.5   | 3.7   |               |
| 6   | Cg0587    | 1 | 1693.8637 | 0.0   | 209   | 222 | 0  | 38.9  | 37 | T | DKPFLMPIEDIFTI           | T | 0.5   | 3.7   | Oxidation (M) |
| 6   | Cg0587    | 1 | 1732.8631 | -0.6  | 49    | 63  | 0  | 74.8  | 37 | A | FDSIDKAPEEKERGI          | T | -1.3  | 4.28  |               |
| 6   | Cg0587    | 1 | 1734.8723 | -0.8  | 110   | 125 | 0  | 55.0  | 37 | A | ATDGPMPQTRHEVLLA         | R | -0.4  | 5.22  |               |
| 6   | Cg0587    | 1 | 1778.9165 | -0.1  | 209   | 223 | 0  | 86.3  | 37 | T | DKPFLMPIEDIFTIT          | G | 0.4   | 3.7   |               |
| 6   | Cg0587    | 1 | 1787.9127 | -2.3  | 180   | 194 | 0  | 103.3 | 37 | A | LEGDEKWGKQILELM          | Q | -0.6  | 4.16  |               |
| 6   | Cg0587    | 1 | 1789.837  | -1.7  | 157   | 171 | 0  | 117.4 | 35 | V | RELLAEQDYDEEAPI          | V | -1.1  | 3.44  |               |
| 6   | Cg0587    | 1 | 1803.9077 | 2.9   | 180   | 194 | 0  | 55.4  | 37 | A | LEGDEKWGKQILELM          | Q | -0.6  | 4.16  | Oxidation (M) |
| 6   | Cg0587    | 1 | 1867.9713 | -5.5  | 255   | 271 | 0  | 53.2  | 37 | T | STTVTGIEMFRKLLDSA        | E | 0.2   | 7.02  |               |
| 6   | Cg0587    | 1 | 1882.9074 | 3.0   | 68    | 82  | 0  | 84.3  | 37 | I | SHVEYQTEKRHYAHV          | D | -1.5  | 7.92  |               |
| 6   | Cg0587    | 1 | 1883.9701 | -18.9 | 231   | 247 | 0  | 82.6  | 37 | T | GRVERGTLNVNDDVDII        | G | -0.4  | 3.96  |               |
| 6   | Cg0587    | 1 | 1946.9949 | -4.6  | 49    | 65  | 0  | 65.9  | 37 | A | FDSIDKAPEEKERGITI        | N | -0.9  | 4.28  |               |
| 6   | Cg0587    | 1 | 1950.9687 | 1.0   | 47    | 63  | 0  | 95.1  | 37 | A | FAFDSIDKAPEEKERGI        | T | -0.8  | 4.28  |               |
| 6   | Cg0587    | 1 | 1950.9761 | -9.9  | 206   | 221 | 0  | 37.1  | 37 | V | RETDKPFLMPIEDIFT         | I | -0.4  | 4.06  |               |
| 6   | Cg0587    | 1 | 1987.0084 | 5.2   | 180   | 196 | 0  | 50.0  | 37 | A | LEGDEKWGKQILEMQA         | C | -0.6  | 4.16  |               |
| 6   | Cg0587    | 1 | 2062.9609 | -1.6  | 316   | 332 | 0  | 103.0 | 35 | S | KDEGGRHTPPFDNYRPQ        | F | -2.0  | 7.74  |               |
| 6   | Cg0587    | 1 | 2064.0601 | 1.9   | 206   | 222 | 0  | 105.4 | 37 | V | RETDKPFLMPIEDIFTI        | T | -0.1  | 4.06  |               |
| 6   | Cg0587    | 1 | 2149.993  | 2.5   | 315   | 332 | 0  | 50.7  | 35 | L | SKDEGGRHTPPFDNYRPQ       | F | -1.9  | 7.74  |               |
| 6   | Cg0587    | 1 | 2165.1004 | -1.2  | 47    | 65  | 0  | 102.2 | 37 | A | FAFDSIDKAPEEKERGITI      | N | -0.6  | 4.28  |               |
| 6   | Cg0587    | 1 | 2165.1078 | 1.1   | 206   | 223 | 0  | 94.2  | 37 | V | RETDKPFLMPIEDIFTIT       | G | -0.2  | 4.06  |               |
| 6   | Cg0587    | 1 | 2248.0426 | 22.8  | 344   | 364 | 0  | 37.7  | 37 | V | VKLPEGTEMVMPGDNDMSVT     | L | -0.1  | 3.58  |               |
| 6   | Cg0587    | 1 | 2263.077  | -5.0  | 314   | 332 | 0  | 48.6  | 36 | V | LSKDEGGRHTPPFDNYRPQ      | F | -1.6  | 7.74  |               |
| 6   | Cg0587    | 1 | 2278.0311 | 1.7   | 153   | 171 | 0  | 51.8  | 34 | V | EMEVRELLAEQDYDEEAPI      | V | -0.9  | 3.32  |               |
| 6   | Cg0587    | 1 | 2319.0861 | 3.8   | 141   | 159 | 0  | 111.2 | 36 | C | DMVEDEEIIELVEMEVREL      | L | -0.2  | 3.28  |               |
| 6   | Cg0587    | 1 | 2348.245  | -4.8  | 209   | 229 | 0  | 50.2  | 37 | T | DKPFLMPIEDIFTITGRGTVV    | T | 0.4   | 4.3   |               |
| 6   | Cg0587    | 1 | 2449.2927 | -5.5  | 209   | 230 | 0  | 89.6  | 38 | T | DKPFLMPIEDIFTITGRGTVVT   | G | 0.3   | 4.3   |               |
| 6   | Cg0587    | 1 | 2734.4364 | -3.7  | 206   | 229 | 0  | 42.3  | 38 | V | RETDKPFLMPIEDIFTITGRGTVV | T | 0.0   | 4.56  |               |

| hit | accession | z | mass      | ppm   | start | end | mc | score | id | - | sequence                   | + | gravy | pl    | modification  |
|-----|-----------|---|-----------|-------|-------|-----|----|-------|----|---|----------------------------|---|-------|-------|---------------|
| 6   | Cg0587    | 1 | 2835.4841 | -3.2  | 206   | 230 | 0  | 59.6  | 38 | V | RETDKPFLLMPIEDIFTITGRGTVVT | G | 0.0   | 4.56  |               |
| 7   | Cg3138    | 1 | 1132.5513 | -0.4  | 146   | 155 | 0  | 57.4  | 36 | A | KVNDYNGNPI                 | N | -1.3  | 6.68  |               |
| 7   | Cg3138    | 1 | 1158.5881 | -1.3  | 2     | 12  | 0  | 37.2  | 36 | M | STIEERTPGAV                | A | -0.5  | 4.26  |               |
| 7   | Cg3138    | 1 | 1200.6292 | 1.0   | 107   | 116 | 0  | 41.8  | 36 | V | QFFGRYIGTL                 | R | 0.3   | 9.84  |               |
| 7   | Cg3138    | 1 | 1285.5575 | 1.5   | 194   | 205 | 0  | 75.4  | 32 | V | ATQHPYDSPVDG               | R | -1.2  | 3.88  |               |
| 7   | Cg3138    | 1 | 1312.6987 | -11.4 | 280   | 290 | 0  | 44.5  | 36 | T | ALDQLEQREIV                | D | -0.4  | 3.82  |               |
| 7   | Cg3138    | 1 | 1341.6677 | -3.8  | 27    | 39  | 0  | 52.5  | 36 | I | NEKNVWVSLGAGPA             | A | -0.5  | 6.94  |               |
| 7   | Cg3138    | 1 | 1368.6422 | -1.9  | 196   | 207 | 0  | 40.0  | 35 | T | QHPYDSPVDGRV               | S | -1.3  | 5.1   |               |
| 7   | Cg3138    | 1 | 1442.7664 | -0.8  | 251   | 263 | 0  | 69.1  | 36 | A | QAMLQRQQASAI               | D | 0.0   | 11.04 |               |
| 7   | Cg3138    | 1 | 1484.646  | 4.8   | 172   | 183 | 0  | 90.8  | 33 | A | SFSVEDFEEFLH               | Q | -0.2  | 3.68  |               |
| 7   | Cg3138    | 1 | 1540.727  | -0.6  | 194   | 207 | 0  | 83.1  | 35 | V | ATQHPYDSPVDGRV             | S | -1.0  | 5.1   |               |
| 7   | Cg3138    | 1 | 1541.7838 | -5.4  | 25    | 39  | 0  | 82.6  | 36 | V | SINEKNVWVSLGAGPA           | A | -0.2  | 6.94  |               |
| 7   | Cg3138    | 1 | 1542.7889 | -4.1  | 278   | 290 | 0  | 56.4  | 37 | V | ETALDQLEQREIV              | D | -0.6  | 3.68  |               |
| 7   | Cg3138    | 1 | 1612.7046 | 4.5   | 172   | 184 | 0  | 85.1  | 33 | A | SFSVEDFEEFLHQ              | Q | -0.5  | 3.68  |               |
| 7   | Cg3138    | 1 | 1676.8006 | 0.4   | 310   | 325 | 0  | 83.0  | 36 | C | SDTNAQPIVNAGSLYQ           | - | -0.4  | 3.1   |               |
| 7   | Cg3138    | 1 | 1724.7682 | -7.8  | 173   | 186 | 0  | 69.4  | 32 | S | FVSVDFEEFLHQQA             | E | -0.5  | 3.68  |               |
| 7   | Cg3138    | 1 | 1740.7631 | 0.2   | 172   | 185 | 0  | 100.6 | 32 | A | SFSVEDFEEFLHQQA            | A | -0.7  | 3.68  |               |
| 7   | Cg3138    | 1 | 1811.8002 | 2.8   | 172   | 186 | 0  | 127.1 | 33 | A | SFSVEDFEEFLHQQA            | E | -0.5  | 3.68  |               |
| 7   | Cg3138    | 1 | 1818.8483 | -3.4  | 208   | 224 | 0  | 113.9 | 35 | V | SLRGATDEVSEELADEV          | A | -0.5  | 3.44  |               |
| 7   | Cg3138    | 1 | 2010.8959 | -1.3  | 170   | 186 | 0  | 50.7  | 33 | A | QASFVDFEEFLHQQA            | E | -0.5  | 3.68  |               |
| 7   | Cg3138    | 1 | 2027.8749 | 0.1   | 172   | 188 | 0  | 103.8 | 31 | A | SFSVEDFEEFLHQQAES          | A | -0.7  | 3.58  |               |
| 7   | Cg3138    | 1 | 2098.912  | 0.0   | 172   | 189 | 0  | 109.4 | 32 | A | SFSVEDFEEFLHQQAESA         | L | -0.6  | 3.58  |               |
| 7   | Cg3138    | 1 | 2117.0766 | -3.9  | 189   | 207 | 0  | 53.3  | 38 | S | ALRHVATQHPYDSPVDGRV        | S | -0.6  | 7.92  |               |
| 7   | Cg3138    | 1 | 2194.1342 | 0.1   | 281   | 298 | 0  | 91.8  | 37 | A | LDQLEQREIVDLPERRA          | A | -1.2  | 4.06  |               |
| 7   | Cg3138    | 1 | 2265.1713 | -3.1  | 280   | 298 | 0  | 107.4 | 37 | T | ALDQLEQREIVDLPERRA         | A | -1.0  | 4.06  |               |
| 7   | Cg3138    | 1 | 2336.2084 | -3.5  | 280   | 299 | 0  | 58.2  | 37 | T | ALDQLEQREIVDLPERRAA        | M | -0.9  | 4.06  |               |
| 7   | Cg3138    | 1 | 2495.2616 | -4.3  | 278   | 298 | 0  | 48.3  | 38 | V | ETALDQLEQREIVDLPERRA       | A | -1.1  | 3.96  |               |
| 8   | Cg2911    | 1 | 1256.531  | 19.2  | 65    | 76  | 0  | 57.1  | 33 | T | GGDIDPHSFEPS               | A | -1.0  | 3.7   |               |
| 8   | Cg2911    | 1 | 1541.6668 | -0.4  | 218   | 231 | 0  | 53.3  | 32 | H | SDMVESTPEGYRAT             | T | -1.0  | 3.82  |               |
| 8   | Cg2911    | 1 | 1839.8891 | 1.0   | 294   | 310 | 0  | 134.2 | 36 | T | ENFLDAFTKAVDDLTAAT         | T | 0.1   | 3.5   |               |
| 8   | Cg2911    | 1 | 1940.9367 | -0.8  | 294   | 311 | 0  | 169.3 | 36 | T | ENFLDAFTKAVDDLTAAT         | N | 0.1   | 3.5   |               |
| 8   | Cg2911    | 1 | 1945.9633 | -1.0  | 53    | 71  | 0  | 111.0 | 37 | A | VAPVDVIEAIIITGGDIDPH       | S | 0.2   | 3.36  |               |
| 8   | Cg2911    | 1 | 2028.0574 | -6.2  | 188   | 204 | 0  | 44.1  | 37 | T | KMDELHNQIHDLPAVRI          | A | -0.6  | 6.02  |               |
| 8   | Cg2911    | 1 | 2099.0946 | -5.8  | 188   | 205 | 0  | 72.6  | 37 | T | KMDELHNQIHDLPAVRIA         | Q | -0.4  | 6.02  |               |
| 8   | Cg2911    | 1 | 2115.0895 | 4.4   | 188   | 205 | 0  | 43.6  | 37 | T | KMDELHNQIHDLPAVRIA         | Q | -0.4  | 6.02  | Oxidation (M) |
| 8   | Cg2911    | 1 | 2156.0273 | 11.6  | 292   | 311 | 0  | 64.2  | 37 | Q | NTENFLDAFTKAVDDLTAAT       | N | -0.2  | 3.5   |               |
| 8   | Cg2911    | 1 | 2200.9913 | 1.6   | 92    | 111 | 0  | 160.6 | 34 | V | GGGGYDSWLYGTLEDDRII        | H | -0.6  | 3.36  |               |
| 8   | Cg2911    | 1 | 2300.8704 | -8.3  | 135   | 153 | 0  | 89.7  | 15 | A | HEHDHDEEGHDHDVDNEHV        | W | -2.4  | 4.32  |               |
| 8   | Cg2911    | 1 | 2413.1438 | -5.8  | 90    | 111 | 0  | 101.5 | 36 | I | IVGGGGYDSWLYGTLEDDRII      | H | -0.2  | 3.36  |               |
| 8   | Cg2911    | 1 | 2493.1911 | 0.0   | 53    | 76  | 0  | 119.2 | 37 | A | VAPVDVIEAIIITGGDIDPHSFEPS  | A | 0.0   | 3.32  |               |

| hit | accession | z | mass      | ppm  | start | end | mc | score | id | - | sequence                                  | + | gravy | pl    | modification |
|-----|-----------|---|-----------|------|-------|-----|----|-------|----|---|-------------------------------------------|---|-------|-------|--------------|
| 8   | Cg2911    | 1 | 2522.1714 | -9.9 | 92    | 114 | 0  | 139.9 | 34 | V | GGGGYDSWLYGTLEDDRIIHAL                    | D | -0.4  | 3.76  |              |
| 8   | Cg2911    | 1 | 2673.2446 | -0.4 | 287   | 310 | 0  | 92.9  | 36 | I | YETPQNTENFLDAFTKAVDDLTA                   | T | -0.5  | 3.42  |              |
| 8   | Cg2911    | 1 | 2774.2923 | 11.1 | 287   | 311 | 0  | 71.2  | 37 | I | YETPQNTENFLDAFTKAVDDLTAAT                 | N | -0.5  | 3.42  |              |
| 8   | Cg2911    | 1 | 2837.3144 | 7.1  | 92    | 117 | 0  | 85.0  | 36 | V | GGGGYDSWLYGTLEDDRIIHALDLS                 | E | -0.4  | 3.62  |              |
| 8   | Cg2911    | 1 | 2954.3716 | 1.0  | 205   | 231 | 0  | 124.3 | 36 | I | AQTEPIADHILSHSDMVESTPEGYRAT               | T | -0.6  | 4.28  |              |
| 8   | Cg2911    | 1 | 3014.4397 | 3.5  | 284   | 310 | 0  | 87.4  | 37 | V | VEIYETPQNTENFLDAFTKAVDDLTA                | T | -0.3  | 3.38  |              |
| 8   | Cg2911    | 1 | 3049.4669 | 9.6  | 90    | 117 | 0  | 43.6  | 38 | I | IVGGGGYDSWLYGTLEDDRIIHALDLS               | E | -0.1  | 3.62  |              |
| 8   | Cg2911    | 1 | 3115.4873 | 6.0  | 284   | 311 | 0  | 42.8  | 38 | V | VEIYETPQNTENFLDAFTKAVDDLTAAT              | N | -0.3  | 3.38  |              |
| 8   | Cg2911    | 1 | 4495.2534 | 15.2 | 271   | 311 | 0  | 46.8  | 39 | T | SLKDLAEEKGIPVVEIYETPQNTENFLDAFTKAVDDLTAAT | N | -0.3  | 3.76  |              |
| 9   | Cg3009    | 1 | 838.3709  | 17.4 | 41    | 48  | 0  | 54.0  | 34 | N | FGDLADTT                                  | G | -0.1  | 2.92  |              |
| 9   | Cg3009    | 1 | 915.4127  | 1.0  | 35    | 41  | 0  | 43.6  | 33 | I | LNFFDNF                                   | G | 0.2   | 3.1   |              |
| 9   | Cg3009    | 1 | 952.4138  | 4.4  | 40    | 48  | 0  | 59.0  | 33 | D | NFGDLADTT                                 | G | -0.4  | 2.92  |              |
| 9   | Cg3009    | 1 | 956.424   | -4.3 | 10    | 18  | 0  | 75.8  | 31 | T | LGNYETFGG                                 | N | -0.4  | 3.3   |              |
| 9   | Cg3009    | 1 | 1044.4553 | 5.6  | 37    | 45  | 0  | 79.0  | 32 | N | FFDNFGDLA                                 | D | 0.3   | 2.92  |              |
| 9   | Cg3009    | 1 | 1087.4611 | 8.0  | 36    | 44  | 0  | 45.1  | 31 | L | NFFDNFGDL                                 | A | -0.2  | 2.92  |              |
| 9   | Cg3009    | 1 | 1158.4982 | 4.7  | 36    | 45  | 0  | 86.1  | 32 | L | NFFDNFGDLA                                | D | 0.0   | 2.92  |              |
| 9   | Cg3009    | 1 | 1200.5452 | -2.3 | 35    | 44  | 0  | 71.4  | 33 | I | LNFFDNFGDL                                | A | 0.2   | 2.92  |              |
| 9   | Cg3009    | 1 | 1271.5823 | 3.9  | 35    | 45  | 0  | 104.0 | 34 | I | LNFFDNFGDLA                               | D | 0.3   | 2.92  |              |
| 9   | Cg3009    | 1 | 1314.6092 | -0.2 | 7     | 18  | 0  | 56.4  | 34 | L | KETLGNYETFGG                              | N | -1.0  | 4.26  |              |
| 9   | Cg3009    | 1 | 1412.6572 | 5.5  | 10    | 23  | 0  | 91.6  | 35 | T | LGNYETFGGNIGTA                            | L | -0.1  | 3.3   |              |
| 9   | Cg3009    | 1 | 1475.6205 | 15.5 | 36    | 48  | 0  | 68.8  | 32 | L | NFFDNFGDLADTT                             | G | -0.4  | 2.82  |              |
| 9   | Cg3009    | 1 | 1540.7773 | 1.6  | 5     | 18  | 0  | 71.2  | 36 | S | LLKETLGNYETFGG                            | N | -0.3  | 4.26  |              |
| 9   | Cg3009    | 1 | 1588.7046 | -0.7 | 35    | 48  | 0  | 96.7  | 33 | I | LNFFDNFGDLADTT                            | G | -0.1  | 2.82  |              |
| 9   | Cg3009    | 1 | 1770.8424 | 5.3  | 7     | 23  | 0  | 90.1  | 36 | L | KETLGNYETFGGNIGTA                         | L | -0.6  | 4.26  |              |
| 9   | Cg3009    | 1 | 1812.8934 | 20.2 | 30    | 45  | 0  | 149.5 | 37 | T | LLDSILNFFDNFGDLA                          | D | 0.7   | 2.82  |              |
| 9   | Cg3009    | 1 | 1925.9735 | -0.6 | 5     | 22  | 0  | 135.2 | 37 | S | LLKETLGNYETFGGNIGT                        | A | -0.2  | 4.26  |              |
| 9   | Cg3009    | 1 | 1997.0106 | 3.1  | 5     | 23  | 0  | 153.7 | 37 | S | LLKETLGNYETFGGNIGTA                       | L | -0.1  | 4.26  |              |
| 9   | Cg3009    | 1 | 2130.0157 | 16.8 | 30    | 48  | 0  | 134.1 | 37 | T | LLDSILNFFDNFGDLADTT                       | G | 0.3   | 2.74  |              |
| 9   | Cg3009    | 1 | 2410.2016 | -0.2 | 7     | 29  | 0  | 78.9  | 38 | L | KETLGNYETFGGNIGTALQSIPT                   | L | -0.4  | 4.26  |              |
| 9   | Cg3009    | 1 | 2636.3697 | 10.4 | 5     | 29  | 0  | 135.8 | 37 | S | LLKETLGNYETFGGNIGTALQSIPT                 | L | 0.0   | 4.26  |              |
| 9   | Cg3009    | 1 | 3177.6809 | 3.6  | 5     | 34  | 0  | 57.7  | 38 | S | LLKETLGNYETFGGNIGTALQSIPTLLDSI            | L | 0.2   | 3.82  |              |
| 10  | Cg0447    | 1 | 791.4905  | -1.0 | 184   | 190 | 0  | 48.5  | 23 | V | HLSLLPL                                   | G | 1.4   | 7.84  |              |
| 10  | Cg0447    | 1 | 1037.5757 | 3.2  | 32    | 40  | 0  | 69.1  | 32 | M | SILELLDHV                                 | N | 1.0   | 4.06  |              |
| 10  | Cg0447    | 1 | 1270.667  | -3.4 | 4     | 14  | 0  | 48.5  | 36 | L | TLEIWRQAGPT                               | A | -0.5  | 6.98  |              |
| 10  | Cg0447    | 1 | 1280.5997 | 2.3  | 133   | 145 | 0  | 78.2  | 35 | I | NAGTAPDADTLHV                             | N | -0.3  | 3.88  |              |
| 10  | Cg0447    | 1 | 1310.7558 | 1.9  | 186   | 197 | 0  | 73.0  | 33 | L | SLLPLGKEERGL                              | R | -0.3  | 7.1   |              |
| 10  | Cg0447    | 1 | 1360.6596 | 1.0  | 71    | 83  | 0  | 88.9  | 36 | V | NGRPHGADQNKPA                             | C | -2.0  | 10.08 |              |
| 10  | Cg0447    | 1 | 1450.862  | -2.9 | 187   | 199 | 0  | 42.4  | 31 | S | LLPLGKEERGLRA                             | R | -0.4  | 10.08 |              |
| 10  | Cg0447    | 1 | 1491.7755 | -1.6 | 106   | 118 | 0  | 80.9  | 36 | A | AYPVIKDMVVDRS                             | A | 0.1   | 6.82  |              |
| 10  | Cg0447    | 1 | 1521.7463 | -4.1 | 41    | 53  | 0  | 95.2  | 36 | V | NNKFIEEGKEPFA                             | F | -1.2  | 4.56  |              |

| hit | accession | z | mass      | ppm   | start | end | mc | score | id | - | sequence                    | + | gravy | pl    | modification  |
|-----|-----------|---|-----------|-------|-------|-----|----|-------|----|---|-----------------------------|---|-------|-------|---------------|
| 10  | Cg0447    | 1 | 1537.894  | -7.1  | 186   | 199 | 0  | 48.6  | 33 | L | SLLPLGKEERGLRA              | R | -0.4  | 10.08 |               |
| 10  | Cg0447    | 1 | 1550.7763 | -2.0  | 119   | 132 | 0  | 111.7 | 36 | S | ALDRVMEQGGYVTI              | N | 0.2   | 4.08  |               |
| 10  | Cg0447    | 1 | 1560.8987 | 2.4   | 184   | 197 | 0  | 94.0  | 32 | V | HLSLLPLGKEERGL              | R | -0.2  | 7.82  |               |
| 10  | Cg0447    | 1 | 1562.8127 | 0.2   | 105   | 118 | 0  | 71.0  | 37 | S | AAYPVIKDMVVDRS              | A | 0.3   | 6.82  |               |
| 10  | Cg0447    | 1 | 1579.7552 | -0.3  | 18    | 31  | 0  | 51.4  | 36 | G | KFETVQVDDAVAQM              | S | -0.1  | 3.7   |               |
| 10  | Cg0447    | 1 | 1642.8865 | -7.7  | 1     | 14  | 0  | 72.5  | 37 | - | MKLTLEIWRQAGPT              | A | -0.3  | 10.08 |               |
| 10  | Cg0447    | 1 | 1659.9672 | -1.4  | 183   | 197 | 0  | 52.4  | 32 | L | VHLSLLPLGKEERGL             | R | 0.1   | 7.82  |               |
| 10  | Cg0447    | 1 | 1739.8519 | 2.1   | 41    | 55  | 0  | 90.6  | 36 | V | NNKFIEEGKEPFAFA             | S | -0.7  | 4.56  |               |
| 10  | Cg0447    | 1 | 1836.8564 | -0.8  | 15    | 31  | 0  | 132.3 | 35 | T | AEGKFETVQVDDAVAQM           | S | -0.2  | 3.58  |               |
| 10  | Cg0447    | 1 | 1872.9006 | 1.9   | 38    | 53  | 0  | 36.8  | 36 | L | DHVNNKFIEEGKEPFA            | F | -1.1  | 4.62  |               |
| 10  | Cg0447    | 1 | 2074.9556 | -0.4  | 133   | 152 | 0  | 102.0 | 35 | I | NAGTAPDADTLHVNHETAEL        | A | -0.6  | 4.06  |               |
| 10  | Cg0447    | 1 | 2541.3115 | 2.0   | 32    | 53  | 0  | 96.3  | 38 | M | SILELLDHVNNKFIEEGKEPFA      | F | -0.3  | 4.36  |               |
| 10  | Cg0447    | 1 | 2759.417  | -1.7  | 32    | 55  | 0  | 108.3 | 38 | M | SILELLDHVNNKFIEEGKEPFAFA    | S | -0.1  | 4.36  |               |
| 11  | Cg0583    | 1 | 1041.5971 | 2.7   | 186   | 194 | 0  | 42.4  | 35 | A | LTWRGVTP                    | G | 0.4   | 11.04 |               |
| 11  | Cg0583    | 1 | 1080.5088 | 0.6   | 89    | 97  | 0  | 65.7  | 35 | V | DFTVEVERS                   | L | -0.6  | 3.82  |               |
| 11  | Cg0583    | 1 | 1171.6058 | 2.2   | 635   | 645 | 0  | 40.7  | 36 | I | GDVNSRRGQIA                 | S | -1.0  | 10.88 |               |
| 11  | Cg0583    | 1 | 1229.6517 | -6.1  | 544   | 554 | 0  | 40.1  | 37 | T | GGRVPREYIPS                 | V | -0.9  | 9.84  |               |
| 11  | Cg0583    | 1 | 1358.6289 | -14.8 | 663   | 674 | 0  | 48.6  | 33 | L | SQMFGYVGDRLS                | K | -0.2  | 6.7   |               |
| 11  | Cg0583    | 1 | 1583.78   | -0.8  | 456   | 469 | 0  | 39.6  | 36 | G | GMGELHLDVLDVDRM             | K | 0.3   | 4.3   |               |
| 11  | Cg0583    | 1 | 1587.7715 | -2.6  | 663   | 676 | 0  | 49.7  | 36 | L | SQMFGYVGDRLRSKT             | Q | -0.5  | 9.72  |               |
| 11  | Cg0583    | 1 | 1595.7692 | 1.1   | 498   | 512 | 0  | 92.9  | 36 | L | SYTHKKQTGGSGQFA             | K | -1.3  | 10.18 |               |
| 11  | Cg0583    | 1 | 1734.8247 | -9.6  | 53    | 66  | 0  | 52.6  | 35 | T | DWMEQEKERGITIT              | S | -1.3  | 4.16  |               |
| 11  | Cg0583    | 1 | 1753.8855 | -2.6  | 454   | 469 | 0  | 96.8  | 37 | V | IGGMGELHLDVLDVDRM           | K | 0.5   | 4.3   |               |
| 11  | Cg0583    | 1 | 1799.953  | 0.7   | 470   | 485 | 0  | 121.8 | 37 | M | KREFKVEANIGDPQVA            | Y | -0.8  | 7.1   |               |
| 11  | Cg0583    | 1 | 1921.0925 | -0.1  | 269   | 286 | 0  | 51.4  | 33 | N | KGIQPLLDVVDVFLPSPL          | D | 0.7   | 3.88  |               |
| 11  | Cg0583    | 1 | 1974.8404 | 18.5  | 223   | 239 | 0  | 53.3  | 33 | V | AESDEELMEKYFGGEEL           | S | -1.0  | 3.44  |               |
| 11  | Cg0583    | 1 | 2397.3308 | 0.3   | 265   | 286 | 0  | 100.5 | 35 | T | AYKNKGIQPLLDVVDVFLPSPL      | D | 0.2   | 6.8   |               |
| 11  | Cg0583    | 1 | 2835.3531 | -2.9  | 444   | 469 | 0  | 87.5  | 37 | V | HLDESQQTIVIGMGELHLDVLDVDRM  | K | -0.1  | 3.98  |               |
| 11  | Cg0583    | 1 | 2859.4477 | -0.9  | 169   | 194 | 0  | 55.5  | 38 | I | GAEDNFDGVIDLLEMKALTWRGVTP   | G | 0.1   | 3.84  |               |
| 11  | Cg0583    | 1 | 2980.427  | -6.5  | 619   | 645 | 0  | 86.0  | 37 | I | MSVEITTPPEEYMGVIGDVNSRRGQIA | S | -0.3  | 4     |               |
| 12  | Cg2780    | 1 | 765.4061  | 3.9   | 274   | 280 | 0  | 50.5  | 33 | L | PPFGIVS                     | E | 1.6   | 6.02  |               |
| 12  | Cg2780    | 1 | 839.433   | 1.7   | 341   | 346 | 0  | 33.5  | 33 | V | KFFNWV                      | G | 0.3   | 10.1  |               |
| 12  | Cg2780    | 1 | 890.4651  | 3.1   | 442   | 449 | 0  | 39.4  | 35 | V | GFHGTFLI                    | Q | 1.2   | 7.84  |               |
| 12  | Cg2780    | 1 | 921.4708  | 12.7  | 500   | 506 | 0  | 37.1  | 35 | S | WRYGELV                     | T | -0.4  | 6.88  |               |
| 12  | Cg2780    | 1 | 995.5076  | 2.9   | 382   | 390 | 0  | 60.6  | 34 | A | SPPLDFHLA                   | D | 0.2   | 4.94  |               |
| 12  | Cg2780    | 1 | 997.5022  | 2.9   | 341   | 348 | 0  | 44.7  | 34 | V | KFFNWVGT                    | M | 0.1   | 10.1  |               |
| 12  | Cg2780    | 1 | 1118.5259 | 0.5   | 416   | 423 | 0  | 44.8  | 35 | V | YFWFPKMT                    | G | -0.1  | 9.72  |               |
| 12  | Cg2780    | 1 | 1123.5774 | -3.5  | 250   | 259 | 0  | 57.1  | 35 | A | NGGSLLWQHL                  | F | -0.1  | 7.84  |               |
| 12  | Cg2780    | 1 | 1185.5641 | 4.3   | 544   | 552 | 0  | 58.5  | 35 | A | FELHYPHMI                   | E | 0.0   | 6.02  |               |
| 12  | Cg2780    | 1 | 1201.559  | 2.1   | 544   | 552 | 0  | 44.1  | 35 | A | FELHYPHMI                   | E | 0.0   | 6.02  | Oxidation (M) |

| hit | accession | z | mass      | ppm   | start | end  | mc | score | id | - | sequence                | + | gravy | pl    | modification |
|-----|-----------|---|-----------|-------|-------|------|----|-------|----|---|-------------------------|---|-------|-------|--------------|
| 12  | Cg2780    | 1 | 1222.6387 | -4.8  | 94    | 104  | 0  | 40.2  | 35 | L | LYGTPIVWGFA             | N | 1.1   | 5.92  |              |
| 12  | Cg2780    | 1 | 1274.6158 | 3.1   | 414   | 423  | 0  | 45.9  | 36 | A | GVYFWFPKMT              | G | 0.3   | 9.72  |              |
| 12  | Cg2780    | 1 | 1297.6125 | 3.9   | 163   | 174  | 0  | 77.1  | 35 | I | HSPGLGSDMWIV            | G | 0.2   | 4.94  |              |
| 12  | Cg2780    | 1 | 1390.7609 | -1.6  | 64    | 75   | 0  | 74.2  | 35 | I | RAELFTPGLQFL            | S | 0.4   | 6.98  |              |
| 12  | Cg2780    | 1 | 1395.646  | -9.9  | 140   | 153  | 0  | 55.4  | 34 | T | GFLTPGGAADFGWT          | M | 0.3   | 3.1   |              |
| 12  | Cg2780    | 1 | 1453.7024 | 2.9   | 163   | 176  | 0  | 67.5  | 36 | I | HSPGLGSDMWIVGV          | G | 0.5   | 4.94  |              |
| 12  | Cg2780    | 1 | 1467.7663 | -0.5  | 119   | 130  | 0  | 62.2  | 36 | A | FPRLNAFGFWIT            | T | 0.6   | 11.04 |              |
| 12  | Cg2780    | 1 | 1616.8311 | 1.6   | 236   | 249  | 0  | 87.1  | 37 | V | LYDRKLGGHLYDPA          | N | -0.7  | 7.68  |              |
| 12  | Cg2780    | 1 | 1725.8911 | -4.5  | 5     | 20   | 0  | 44.4  | 37 | V | APRVDGHVAPQRPEPT        | G | -1.1  | 7.84  |              |
| 12  | Cg2780    | 1 | 1751.7937 | 2.9   | 76    | 90   | 0  | 92.9  | 34 | L | SNEQFNQLFTMHGTV         | M | -0.5  | 5.12  |              |
| 12  | Cg2780    | 1 | 1824.9595 | -3.1  | 4     | 20   | 0  | 58.9  | 37 | A | VAPRVDGHVAPQRPEPT       | G | -0.8  | 7.84  |              |
| 13  | Cg1656    | 1 | 969.3981  | -0.8  | 123   | 130  | 0  | 47.0  | 30 | S | YFGNDHFA                | E | -0.6  | 4.94  |              |
| 13  | Cg1656    | 1 | 1156.5149 | 3.8   | 196   | 205  | 0  | 76.9  | 33 | L | AGEYKNFNTN              | S | -1.6  | 6.86  |              |
| 13  | Cg1656    | 1 | 1269.5989 | -4.4  | 195   | 205  | 0  | 70.6  | 34 | T | LAGEYKNFNTN             | S | -1.1  | 6.86  |              |
| 13  | Cg1656    | 1 | 1427.6681 | 0.5   | 195   | 207  | 0  | 120.3 | 34 | T | LAGEYKNFNTNSA           | K | -0.8  | 6.86  |              |
| 13  | Cg1656    | 1 | 1470.6204 | 2.2   | 123   | 135  | 0  | 86.1  | 31 | S | YFGNDHFAEFAPG           | M | -0.4  | 4.06  |              |
| 13  | Cg1656    | 1 | 1493.8354 | -4.6  | 213   | 226  | 0  | 69.8  | 34 | L | DGAPQVLPPFGKRL          | G | -0.3  | 10.08 |              |
| 13  | Cg1656    | 1 | 1550.8569 | -5.1  | 213   | 227  | 0  | 91.1  | 34 | L | DGAPQVLPPFGKRLG         | R | -0.3  | 10.08 |              |
| 13  | Cg1656    | 1 | 1606.9195 | -18.9 | 211   | 225  | 0  | 38.2  | 34 | I | LLDGAPQVLPPFGKRL        | L | -0.1  | 10.08 |              |
| 13  | Cg1656    | 1 | 1663.8066 | -3.2  | 192   | 205  | 0  | 65.7  | 36 | A | HRTLAGEYKNFNTN          | S | -1.5  | 9.72  |              |
| 13  | Cg1656    | 1 | 1720.0036 | -2.8  | 211   | 226  | 0  | 80.4  | 31 | I | LLDGAPQVLPPFGKRL        | G | 0.2   | 10.08 |              |
| 13  | Cg1656    | 1 | 1777.025  | -4.5  | 211   | 227  | 0  | 81.0  | 32 | I | LLDGAPQVLPPFGKRLG       | R | 0.2   | 10.08 |              |
| 13  | Cg1656    | 1 | 1821.8758 | -5.1  | 192   | 207  | 0  | 47.5  | 36 | A | HRTLAGEYKNFNTNSA        | K | -1.2  | 9.72  |              |
| 13  | Cg1656    | 1 | 1859.9305 | -0.8  | 100   | 115  | 0  | 43.7  | 37 | A | SLGEFTRVFEYDSLIV        | G | 0.4   | 3.82  |              |
| 13  | Cg1656    | 1 | 1890.1091 | -6.5  | 210   | 227  | 0  | 43.0  | 31 | I | ILLDGAPQVLPPFGKRLG      | R | 0.4   | 10.08 |              |
| 13  | Cg1656    | 1 | 1960.9966 | -0.3  | 451   | 467  | 0  | 43.5  | 37 | A | SSDLPIELRDNRFSQK        | - | -1.2  | 7.06  |              |
| 13  | Cg1656    | 1 | 2118.2062 | -26.8 | 211   | 230  | 0  | 58.3  | 36 | I | LLDGAPQVLPPFGKRLGRNA    | Q | -0.2  | 11.32 |              |
| 13  | Cg1656    | 1 | 2448.0829 | 4.9   | 346   | 366  | 0  | 56.2  | 33 | I | EAEVEGRSNTEREAFDYFDKG   | S | -1.5  | 4.02  |              |
| 13  | Cg1656    | 1 | 2586.1737 | 0.8   | 123   | 145  | 0  | 110.2 | 34 | S | YFGNDHFAEFAPGMKSIDDALEI | R | -0.2  | 3.84  |              |
| 14  | Cg0957    | 1 | 1034.5185 | 1.2   | 1951  | 1958 | 0  | 36.1  | 36 | A | ILFDDRWA                | S | 0.1   | 3.88  |              |
| 14  | Cg0957    | 1 | 1045.5345 | 5.0   | 794   | 801  | 0  | 39.4  | 37 | A | RWWGLDTL                | W | -0.4  | 6.78  |              |
| 14  | Cg0957    | 1 | 1280.734  | -1.7  | 1061  | 1071 | 0  | 36.1  | 32 | L | LDLRIPLELA              | N | 0.4   | 3.82  |              |
| 14  | Cg0957    | 1 | 1316.6361 | -14.7 | 1427  | 1437 | 0  | 44.2  | 35 | A | ATEVENWVDRV             | A | -0.5  | 3.82  |              |
| 14  | Cg0957    | 1 | 1426.7932 | 0.2   | 2312  | 2324 | 0  | 41.9  | 35 | I | KALPSPKHPEQPV           | G | -1.2  | 9.88  |              |
| 14  | Cg0957    | 1 | 1592.7987 | 4.0   | 688   | 699  | 0  | 41.8  | 37 | M | TYAEWIQRWVEL            | A | -0.4  | 4.26  |              |
| 14  | Cg0957    | 1 | 1618.7628 | -1.7  | 704   | 716  | 0  | 56.0  | 36 | T | QDPTWDDRFLDLV           | H | -0.8  | 3.42  |              |
| 14  | Cg0957    | 1 | 1663.8358 | -0.4  | 688   | 700  | 0  | 54.4  | 37 | M | TYAEWIQRWVELA           | Y | -0.2  | 4.26  |              |
| 14  | Cg0957    | 1 | 1825.0097 | -4.4  | 1056  | 1070 | 0  | 53.2  | 36 | V | HLDHLLDLRIPLEEL         | A | 0.1   | 4.52  |              |
| 14  | Cg0957    | 1 | 1896.0469 | -2.8  | 1056  | 1071 | 0  | 67.5  | 35 | V | HLDHLLDLRIPLEELA        | N | 0.2   | 4.52  |              |
| 14  | Cg0957    | 1 | 1954.9313 | -6.1  | 910   | 925  | 0  | 78.8  | 36 | A | DSYFDDLPVEQRPYLV        | Q | -0.6  | 3.5   |              |



| hit | accession | z | mass      | ppm   | start | end  | mc | score | id | - | sequence                  | + | gravy | pl    | modification |
|-----|-----------|---|-----------|-------|-------|------|----|-------|----|---|---------------------------|---|-------|-------|--------------|
| 14  | Cg0957    | 1 | 1971.9731 | 3.0   | 332   | 348  | 0  | 94.2  | 37 | G | FHVPTAEDWSEFAPKLV         | K | -0.1  | 4.42  |              |
| 14  | Cg0957    | 1 | 1979.9265 | -5.7  | 701   | 716  | 0  | 51.1  | 35 | A | YPTQDPTWDDRFLDLV          | H | -0.9  | 3.42  |              |
| 14  | Cg0957    | 1 | 1995.1153 | -2.8  | 1055  | 1071 | 0  | 88.3  | 35 | A | VHLDHLLDRIPLEELA          | N | 0.4   | 4.52  |              |
| 15  | Cg2403    | 1 | 938.4749  | -3.2  | 56    | 63   | 0  | 47.5  | 34 | T | LFFDPSIT                  | K | 0.9   | 3.1   |              |
| 15  | Cg2403    | 1 | 945.547   | 6.9   | 245   | 252  | 0  | 52.8  | 32 | I | RIMPLFAV                  | K | 1.6   | 11.04 |              |
| 15  | Cg2403    | 1 | 970.527   | 2.2   | 442   | 450  | 0  | 37.6  | 35 | G | IIKQMPNGA                 | F | 0.0   | 10.1  |              |
| 15  | Cg2403    | 1 | 985.4844  | 3.2   | 180   | 186  | 0  | 40.3  | 34 | G | TWMHWLI                   | F | 0.6   | 7.84  |              |
| 15  | Cg2403    | 1 | 1027.5484 | -4.2  | 441   | 450  | 0  | 62.3  | 35 | T | GIKQMPNGA                 | F | -0.1  | 10.1  |              |
| 15  | Cg2403    | 1 | 1184.59   | 1.2   | 194   | 202  | 0  | 46.3  | 35 | S | DLMLDRFYI                 | A | 0.4   | 3.88  |              |
| 15  | Cg2403    | 1 | 1236.6754 | -0.5  | 64    | 74   | 0  | 73.4  | 34 | T | KVIYDGGYLPL               | N | 0.4   | 6.62  |              |
| 15  | Cg2403    | 1 | 1255.6271 | -1.7  | 194   | 203  | 0  | 39.9  | 35 | S | DLMLDRFYIA                | H | 0.6   | 3.88  |              |
| 15  | Cg2403    | 1 | 1305.599  | -0.5  | 492   | 503  | 0  | 73.9  | 35 | T | RGGFFGPDPEI               | R | -0.8  | 3.7   |              |
| 15  | Cg2403    | 1 | 1344.6462 | -1.6  | 275   | 286  | 0  | 49.2  | 36 | I | NAIWNLGPYNPS              | Q | -0.6  | 5.92  |              |
| 15  | Cg2403    | 1 | 1535.6893 | -5.6  | 490   | 503  | 0  | 35.9  | 33 | V | ETRGGFFGPDPEI             | R | -1.0  | 3.58  |              |
| 15  | Cg2403    | 1 | 1579.8695 | -4.6  | 353   | 365  | 0  | 54.2  | 35 | A | HHNLLQRPRDVPV             | R | -1.0  | 10.88 |              |
| 15  | Cg2403    | 1 | 1776.8716 | 2.8   | 476   | 491  | 0  | 50.8  | 37 | A | AVPKQMNQLGYAEVET          | R | -0.5  | 4.26  |              |
| 15  | Cg2403    | 1 | 2022.9469 | -2.0  | 289   | 307  | 0  | 62.5  | 36 | V | SAGSQPDVYMLWTDGAARV       | M | -0.1  | 3.88  |              |
| 15  | Cg2403    | 1 | 2116.049  | -0.3  | 455   | 474  | 0  | 46.9  | 37 | V | HQPLGPVDDHGHPIPLPYAG      | A | -0.6  | 5.72  |              |
| 15  | Cg2403    | 1 | 2187.0862 | -1.0  | 455   | 475  | 0  | 116.5 | 37 | V | HQPLGPVDDHGHPIPLPYAGA     | A | -0.5  | 5.72  |              |
| 15  | Cg2403    | 1 | 2298.1676 | -3.3  | 520   | 539  | 0  | 63.2  | 38 | A | NTLRALNEANIERDKNEGKN      | - | -1.7  | 7.18  |              |
| 15  | Cg2403    | 1 | 2476.254  | 3.1   | 451   | 472  | 0  | 47.4  | 38 | A | FIEVHQPLGPVDDHGHPIPLPY    | A | -0.3  | 5.02  |              |
| 15  | Cg2403    | 1 | 2675.3496 | -3.6  | 451   | 475  | 0  | 78.3  | 38 | A | FIEVHQPLGPVDDHGHPIPLPYAGA | A | -0.1  | 5.02  |              |
| 16  | Cg2843    | 1 | 1048.5342 | 4.9   | 90    | 98   | 0  | 42.7  | 36 | V | FQKANPFPT                 | M | -0.8  | 10.1  |              |
| 16  | Cg2843    | 1 | 1197.5455 | 4.3   | 10    | 19   | 0  | 65.2  | 34 | V | NIYYGDFHAV                | Q | 0.0   | 4.94  |              |
| 16  | Cg2843    | 1 | 1267.6197 | -2.1  | 217   | 228  | 0  | 46.5  | 35 | T | AFYSLEATGRPG              | R | -0.3  | 6.88  |              |
| 16  | Cg2843    | 1 | 1538.7154 | -5.8  | 10    | 22   | 0  | 35.2  | 35 | V | NIYYGDFHAVQNV             | N | -0.2  | 4.94  |              |
| 16  | Cg2843    | 1 | 1626.7049 | 6.5   | 240   | 252  | 0  | 83.6  | 33 | I | FENPDQKETEDYI             | S | -1.9  | 3.5   |              |
| 16  | Cg2843    | 1 | 1770.7584 | -0.8  | 240   | 254  | 0  | 115.5 | 31 | I | FENPDQKETEDYISG           | R | -1.7  | 3.5   |              |
| 16  | Cg2843    | 1 | 1812.9509 | -22.8 | 186   | 200  | 0  | 70.7  | 37 | A | VEDLIHELKEEFTIV           | I | 0.2   | 4     |              |
| 16  | Cg2843    | 1 | 1883.988  | -9.3  | 185   | 200  | 0  | 111.0 | 37 | L | AVEDLIHELKEEFTIV          | I | 0.3   | 4     |              |
| 16  | Cg2843    | 1 | 1925.0007 | -5.0  | 132   | 148  | 0  | 53.2  | 37 | A | NLWEEVKDRLDKPGGGL         | S | -1.1  | 4.56  |              |
| 16  | Cg2843    | 1 | 1997.0721 | -2.1  | 184   | 200  | 0  | 82.1  | 36 | T | LAVEDLIHELKEEFTIV         | I | 0.5   | 4     |              |
| 16  | Cg2843    | 1 | 2009.0766 | 7.3   | 138   | 156  | 0  | 45.5  | 36 | V | KDRLDKPGGGLSGGQQQRL       | C | -1.4  | 10.58 |              |
| 16  | Cg2843    | 1 | 2086.0834 | -2.2  | 182   | 199  | 0  | 59.7  | 37 | I | STLAVEDLIHELKEEFTI        | V | 0.1   | 4     |              |
| 16  | Cg2843    | 1 | 2098.1198 | -6.7  | 183   | 200  | 0  | 56.6  | 37 | S | TLAVEDLIHELKEEFTIV        | I | 0.4   | 4     |              |
| 16  | Cg2843    | 1 | 2130.9494 | -1.3  | 240   | 257  | 0  | 150.1 | 33 | I | FENPDQKETEDYISGRFG        | - | -1.6  | 3.92  |              |
| 16  | Cg2843    | 1 | 2185.1518 | -2.5  | 182   | 200  | 0  | 130.0 | 37 | I | STLAVEDLIHELKEEFTIV       | I | 0.3   | 4     |              |
| 16  | Cg2843    | 1 | 2397.3043 | -5.8  | 182   | 202  | 0  | 68.4  | 37 | I | STLAVEDLIHELKEEFTIVIV     | T | 0.7   | 4     |              |
| 16  | Cg2843    | 1 | 2436.2437 | -0.7  | 2     | 22   | 0  | 49.0  | 38 | M | SKLKLNDVNIYYGDFHAVQNV     | N | -0.3  | 7.66  |              |
| 17  | Cg2404    | 1 | 906.5651  | 2.3   | 374   | 381  | 0  | 52.1  | 24 | A | RALPQLPI                  | T | 0.3   | 11.04 |              |

| hit | accession | z | mass      | ppm   | start | end | mc | score | id | - | sequence                 | + | gravy | pl    | modification |
|-----|-----------|---|-----------|-------|-------|-----|----|-------|----|---|--------------------------|---|-------|-------|--------------|
| 17  | Cg2404    | 1 | 977.6022  | -5.6  | 373   | 381 | 0  | 47.4  | 26 | A | ARALPQLPI                | T | 0.5   | 11.04 |              |
| 17  | Cg2404    | 1 | 1084.5553 | -6.3  | 392   | 402 | 0  | 41.7  | 35 | A | AGNFIEPLGPA              | F | 0.3   | 3.3   |              |
| 17  | Cg2404    | 1 | 1125.5284 | 1.0   | 76    | 83  | 0  | 35.4  | 34 | I | FWPWEYKA                 | H | -0.9  | 6.86  |              |
| 17  | Cg2404    | 1 | 1178.656  | 3.2   | 35    | 43  | 0  | 34.3  | 33 | I | AYRKERFPI                | A | -1.1  | 10.38 |              |
| 17  | Cg2404    | 1 | 1284.5087 | -2.5  | 321   | 330 | 0  | 67.1  | 26 | S | FHYGDYYAYS               | K | -0.9  | 4.94  |              |
| 17  | Cg2404    | 1 | 1296.6285 | -1.3  | 187   | 197 | 0  | 49.3  | 35 | I | KNPWNPKEGPM              | D | -2.0  | 9.88  |              |
| 17  | Cg2404    | 1 | 1349.7819 | 1.8   | 369   | 381 | 0  | 64.7  | 31 | V | FGPAARALPQLPI            | T | 0.5   | 11.04 |              |
| 17  | Cg2404    | 1 | 1371.6241 | -1.3  | 282   | 292 | 0  | 43.9  | 34 | A | KDVYEHQMHSV              | H | -1.1  | 6.02  |              |
| 17  | Cg2404    | 1 | 1377.7908 | -3.2  | 116   | 126 | 0  | 62.6  | 32 | V | LYVKKFIPEEI              | A | 0.2   | 7     |              |
| 17  | Cg2404    | 1 | 1401.6757 | 5.9   | 74    | 83  | 0  | 48.4  | 36 | T | YIFWPWEYKA               | H | -0.4  | 6.8   |              |
| 17  | Cg2404    | 1 | 1502.7234 | -0.5  | 73    | 83  | 0  | 55.6  | 36 | A | TYIFWPWEYKA              | H | -0.5  | 6.8   |              |
| 17  | Cg2404    | 1 | 1510.7238 | -0.8  | 187   | 199 | 0  | 66.6  | 36 | I | KNPWNPKEGPM DV           | Q | -1.7  | 6.98  |              |
| 17  | Cg2404    | 1 | 1760.8165 | -3.0  | 284   | 298 | 0  | 73.6  | 35 | D | VYEHQMHSVH GPRNA         | V | -1.1  | 8     |              |
| 17  | Cg2404    | 1 | 1868.8913 | 6.3   | 183   | 199 | 0  | 74.2  | 36 | M | GGMIKNPWNPKEGPM DV       | Q | -1.0  | 6.98  |              |
| 17  | Cg2404    | 1 | 2035.0375 | -6.0  | 209   | 226 | 0  | 112.9 | 37 | S | GWTLVENDVKVYLGRDTA       | A | -0.3  | 4.3   |              |
| 17  | Cg2404    | 1 | 2068.1204 | -5.2  | 373   | 391 | 0  | 58.2  | 37 | A | ARALPQLPITVDEEGYLIA      | A | 0.3   | 3.82  |              |
| 18  | Cg2708    | 1 | 1148.605  | 1.0   | 71    | 80  | 0  | 42.3  | 35 | T | HVAPRDRDIA               | M | -0.9  | 7.84  |              |
| 18  | Cg2708    | 1 | 1383.6281 | -9.0  | 83    | 93  | 0  | 39.8  | 33 | V | FQNYALYPHMT              | V | -0.4  | 7.7   |              |
| 18  | Cg2708    | 1 | 1457.7337 | -12.3 | 152   | 163 | 0  | 36.5  | 36 | V | RNPQVFLMDEPL             | S | -0.4  | 4.08  |              |
| 18  | Cg2708    | 1 | 1482.6966 | -0.2  | 83    | 94  | 0  | 86.1  | 35 | V | FQNYALYPHMTV             | G | -0.1  | 7.7   |              |
| 18  | Cg2708    | 1 | 1500.8664 | -1.2  | 124   | 136 | 0  | 74.5  | 33 | L | GLTEFLERKPKAL            | S | -0.5  | 9.88  |              |
| 18  | Cg2708    | 1 | 1613.9504 | -1.2  | 123   | 136 | 0  | 60.2  | 31 | T | LGLTEFLERKPKAL           | S | -0.2  | 9.88  |              |
| 18  | Cg2708    | 1 | 1714.9981 | -4.0  | 122   | 136 | 0  | 39.0  | 32 | A | TLGLTEFLERKPKAL          | S | -0.2  | 9.88  |              |
| 18  | Cg2708    | 1 | 1743.8679 | -3.4  | 281   | 296 | 0  | 78.3  | 37 | I | GFRPEALEIIP EGEST        | D | -0.4  | 3.8   |              |
| 18  | Cg2708    | 1 | 1771.8927 | -1.6  | 152   | 166 | 0  | 42.4  | 37 | V | RNPQVFLMDEPLSNL          | D | -0.4  | 4.08  |              |
| 18  | Cg2708    | 1 | 1857.0723 | -4.4  | 120   | 136 | 0  | 34.9  | 33 | A | AATLGLTEFLERKPKAL        | S | 0.0   | 9.88  |              |
| 18  | Cg2708    | 1 | 2089.0878 | -5.8  | 157   | 174 | 0  | 44.3  | 37 | V | FLMDEPLSNLDAKLRVQT       | R | -0.2  | 4.3   |              |
| 18  | Cg2708    | 1 | 2137.128  | -7.2  | 62    | 80  | 0  | 38.3  | 37 | A | IFIGDKDVTHVAPRDRDIA      | M | -0.2  | 5.26  |              |
| 18  | Cg2708    | 1 | 2382.2318 | -7.1  | 281   | 302 | 0  | 116.2 | 38 | I | GFRPEALEIIP EGESTDLSIPI  | K | 0.0   | 3.58  |              |
| 19  | Cg1787    | 1 | 1085.6121 | 6.2   | 546   | 554 | 0  | 53.3  | 35 | A | GILDELWKI                | D | 0.5   | 4.08  |              |
| 19  | Cg1787    | 1 | 1243.7289 | 4.7   | 10    | 20  | 0  | 76.0  | 32 | I | RFLGQILGEVI              | A | 1.0   | 6.98  |              |
| 19  | Cg1787    | 1 | 1396.7714 | 1.4   | 743   | 754 | 0  | 67.7  | 35 | S | SVEDLRAIPWVL             | S | 0.6   | 4.08  |              |
| 19  | Cg1787    | 1 | 1483.8035 | 1.5   | 742   | 754 | 0  | 45.8  | 36 | T | SSVEDLRAIPWVL            | S | 0.5   | 4.08  |              |
| 19  | Cg1787    | 1 | 1735.79   | 1.3   | 79    | 92  | 0  | 81.8  | 35 | A | NLAEDLYDEELREQ           | A | -1.5  | 3.44  |              |
| 19  | Cg1787    | 1 | 1786.8261 | 18.6  | 415   | 429 | 0  | 44.6  | 36 | N | SESYEDVLT ELFERA         | Q | -0.6  | 3.58  |              |
| 19  | Cg1787    | 1 | 1965.0894 | -4.2  | 218   | 234 | 0  | 81.9  | 35 | L | SLLEEIPRINRDVAVEL        | R | 0.1   | 4.16  |              |
| 19  | Cg1787    | 1 | 2089.1381 | -3.6  | 500   | 518 | 0  | 53.1  | 36 | A | SSVTDVLEPMVLLKEFGLI      | A | 1.0   | 3.82  |              |
| 19  | Cg1787    | 1 | 2114.1008 | -5.9  | 10    | 28  | 0  | 62.6  | 37 | I | RFLGQILGEVIAEQEGQEV      | Y | 0.0   | 3.8   |              |
| 19  | Cg1787    | 1 | 2260.1627 | -3.7  | 535   | 554 | 0  | 97.1  | 38 | L | FETIEDLQAGAGILDELWKI     | D | 0.2   | 3.5   |              |
| 19  | Cg1787    | 1 | 2881.6024 | -3.7  | 434   | 457 | 0  | 36.6  | 35 | A | NYRELSEAEKLEVLLKELRSPRPL | I | -0.8  | 7.2   |              |

| hit | accession | z | mass      | ppm  | start | end | mc | score | id | - | sequence                   | + | gravy | pl   | modification |
|-----|-----------|---|-----------|------|-------|-----|----|-------|----|---|----------------------------|---|-------|------|--------------|
| 19  | Cg1787    | 1 | 3018.6614 | -7.6 | 219   | 244 | 0  | 40.5  | 37 | S | LLEEIPRINRDVAVELRERFEGGVPL | K | -0.2  | 4.5  |              |
| 20  | Cg1368    | 1 | 1284.6867 | 4.6  | 260   | 269 | 0  | 65.5  | 36 | L | LFIDNIFRFT                 | Q | 0.9   | 6.78 |              |
| 20  | Cg1368    | 1 | 1326.6721 | -2.6 | 418   | 428 | 0  | 63.5  | 36 | I | ERFLGQNFFVA                | E | 0.3   | 6.98 |              |
| 20  | Cg1368    | 1 | 1426.7456 | -7.1 | 26    | 38  | 0  | 64.2  | 36 | A | VVDVEFPRGELPA              | L | 0.2   | 3.82 |              |
| 20  | Cg1368    | 1 | 1524.7209 | -2.8 | 248   | 259 | 0  | 65.5  | 35 | A | EYFRDVQNQDVL               | L | -1.0  | 3.7  |              |
| 20  | Cg1368    | 1 | 1540.7634 | -5.8 | 117   | 129 | 0  | 79.2  | 36 | V | SLNNNPEIERWGI              | H | -1.0  | 4.26 |              |
| 20  | Cg1368    | 1 | 1554.8042 | -7.8 | 24    | 38  | 0  | 44.5  | 36 | I | GAVDVEFPRGELPA             | L | 0.3   | 3.82 |              |
| 20  | Cg1368    | 1 | 1598.6956 | 11.3 | 204   | 216 | 0  | 33.6  | 33 | T | REGTDLFLEMEEM              | G | -0.7  | 3.58 |              |
| 20  | Cg1368    | 1 | 1637.8049 | -9.4 | 248   | 260 | 0  | 45.9  | 36 | A | EYFRDVQNQDVL               | F | -0.6  | 3.7  |              |
| 20  | Cg1368    | 1 | 1754.7855 | -0.7 | 204   | 218 | 0  | 85.7  | 33 | T | REGTDLFLEMEEMGV            | L | -0.3  | 3.58 |              |
| 20  | Cg1368    | 1 | 1897.9574 | -1.9 | 248   | 262 | 0  | 55.2  | 37 | A | EYFRDVQNQDVLFI             | D | 0.0   | 3.7  |              |
| 20  | Cg1368    | 1 | 2095.095  | -3.1 | 464   | 483 | 0  | 77.1  | 37 | A | FNGLGGLDDVEAAYKLTGK        | - | -0.4  | 6.96 |              |
| 21  | Cg0791    | 1 | 828.4229  | 26.2 | 908   | 915 | 0  | 44.8  | 35 | Y | DIPDSVIA                   | F | 0.7   | 2.92 |              |
| 21  | Cg0791    | 1 | 1143.64   | 1.5  | 731   | 739 | 0  | 43.7  | 35 | A | LRREFDLPV                  | H | -0.3  | 7.04 |              |
| 21  | Cg0791    | 1 | 1433.6463 | 3.8  | 591   | 601 | 0  | 60.2  | 35 | L | FEDPWDRLEL                 | R | -1.3  | 3.42 |              |
| 21  | Cg0791    | 1 | 1509.7827 | -4.4 | 638   | 651 | 0  | 53.5  | 36 | A | ASSGVDIFRIFDAL             | N | 0.9   | 3.88 |              |
| 21  | Cg0791    | 1 | 1517.8929 | -5.1 | 498   | 510 | 0  | 41.3  | 31 | I | DKLPNIKDLPLPR              | G | -0.9  | 9.88 |              |
| 21  | Cg0791    | 1 | 1592.8199 | 3.3  | 641   | 654 | 0  | 39.4  | 36 | S | GVDIFRIFDALNDV             | S | 0.7   | 3.6  |              |
| 21  | Cg0791    | 1 | 1661.9464 | -5.0 | 498   | 512 | 0  | 76.9  | 34 | I | DKLPNIKDLPLPRGS            | R | -0.9  | 9.88 |              |
| 21  | Cg0791    | 1 | 1834.9366 | -3.8 | 916   | 932 | 0  | 69.1  | 37 | A | FLRGELGNPPGGWPEPL          | R | -0.6  | 4.26 |              |
| 21  | Cg0791    | 1 | 1837.921  | 0.4  | 638   | 654 | 0  | 52.0  | 37 | A | ASSGVDIFRIFDALNDV          | S | 0.6   | 3.6  |              |
| 21  | Cg0791    | 1 | 1924.9531 | 0.1  | 638   | 655 | 0  | 44.3  | 37 | A | ASSGVDIFRIFDALNDVS         | Q | 0.5   | 3.6  |              |
| 21  | Cg0791    | 1 | 2163.096  | -3.3 | 459   | 477 | 0  | 58.7  | 37 | P | HLLQAPPADDEQGRILDYL        | A | -0.5  | 3.96 |              |
| 21  | Cg0791    | 1 | 2549.2762 | -3.1 | 459   | 481 | 0  | 40.2  | 38 | P | HLLQAPPADDEQGRILDYLDV      | V | -0.4  | 3.76 |              |
| 22  | Cg2875    | 1 | 856.4443  | 0.6  | 11    | 18  | 0  | 55.2  | 34 | S | IFDGVHGL                   | V | 1.0   | 4.94 |              |
| 22  | Cg2875    | 1 | 955.5127  | 3.7  | 11    | 19  | 0  | 59.1  | 34 | S | IFDGVHGLV                  | G | 1.3   | 4.94 |              |
| 22  | Cg2875    | 1 | 1012.5342 | 1.0  | 11    | 20  | 0  | 57.3  | 34 | S | IFDGVHGLVG                 | S | 1.2   | 4.94 |              |
| 22  | Cg2875    | 1 | 1035.5237 | -3.2 | 27    | 36  | 0  | 78.2  | 36 | A | QGVFDSIVTA                 | S | 0.9   | 3.1  |              |
| 22  | Cg2875    | 1 | 1071.5349 | 2.1  | 9     | 18  | 0  | 66.7  | 36 | I | QSIFDGVHGL                 | V | 0.4   | 4.94 |              |
| 22  | Cg2875    | 1 | 1099.5662 | -3.4 | 11    | 21  | 0  | 45.5  | 36 | S | IFDGVHGLVGS                | I | 1.0   | 4.94 |              |
| 22  | Cg2875    | 1 | 1170.6033 | -1.3 | 9     | 19  | 0  | 73.8  | 36 | I | QSIFDGVHGLV                | G | 0.7   | 4.94 |              |
| 22  | Cg2875    | 1 | 1212.6503 | -0.1 | 11    | 22  | 0  | 95.4  | 35 | S | IFDGVHGLVGS                | F | 1.3   | 4.94 |              |
| 22  | Cg2875    | 1 | 1227.6248 | -2.1 | 9     | 20  | 0  | 83.8  | 36 | I | QSIFDGVHGLVG               | S | 0.6   | 4.94 |              |
| 22  | Cg2875    | 1 | 1314.6568 | -9.3 | 9     | 21  | 0  | 109.3 | 36 | I | QSIFDGVHGLVGS              | I | 0.5   | 4.94 |              |
| 22  | Cg2875    | 1 | 1427.7409 | -1.5 | 9     | 22  | 0  | 119.3 | 36 | I | QSIFDGVHGLVGS              | F | 0.8   | 4.94 |              |
| 22  | Cg2875    | 1 | 1842.9629 | -0.9 | 11    | 29  | 0  | 81.0  | 37 | S | IFDGVHGLVGSIFAGAQQV        | F | 1.1   | 4.94 |              |
| 23  | Cg2181    | 1 | 1238.5779 | -5.7 | 271   | 281 | 0  | 38.8  | 35 | S | SFEDELGRSI                 | N | -0.6  | 3.82 |              |
| 23  | Cg2181    | 1 | 1435.6983 | 2.6  | 406   | 418 | 0  | 44.7  | 36 | I | DAIGNPYPDFKSL              | R | -0.6  | 3.88 |              |
| 23  | Cg2181    | 1 | 1472.6783 | -2.4 | 269   | 281 | 0  | 79.4  | 34 | A | FSSFEDDELGRSI              | N | -0.4  | 3.82 |              |
| 23  | Cg2181    | 1 | 1834.8697 | -2.8 | 271   | 287 | 0  | 57.2  | 36 | S | SFEDELGRSINQPSAV           | F | -0.6  | 3.82 |              |

| hit | accession | z | mass      | ppm   | start | end | mc | score | id | - | sequence                  | + | gravy | pl    | modification  |
|-----|-----------|---|-----------|-------|-------|-----|----|-------|----|---|---------------------------|---|-------|-------|---------------|
| 23  | Cg2181    | 1 | 2068.9702 | -2.7  | 269   | 287 | 0  | 77.3  | 36 | A | FSSFEDELSGRSINQPSAV       | F | -0.4  | 3.82  |               |
| 23  | Cg2181    | 1 | 2138.9797 | 21.3  | 288   | 306 | 0  | 62.4  | 37 | V | FQSFTIPESLEHFSGEEGV       | L | -0.3  | 3.78  |               |
| 23  | Cg2181    | 1 | 2252.0637 | -4.2  | 288   | 307 | 0  | 68.0  | 36 | V | FQSFTIPESLEHFSGEEGVL      | R | -0.1  | 3.78  |               |
| 23  | Cg2181    | 1 | 2393.1611 | -3.8  | 406   | 426 | 0  | 57.0  | 37 | I | DAIGNPYPDFKSLRDDVTNRT     | I | -1.1  | 4.34  |               |
| 23  | Cg2181    | 1 | 2876.4457 | -3.0  | 288   | 312 | 0  | 81.4  | 38 | V | FQSFTIPESLEHFSGEEGLRRQAI  | S | -0.3  | 4.7   |               |
| 23  | Cg2181    | 1 | 2963.4777 | -20.7 | 288   | 313 | 0  | 45.0  | 37 | V | FQSFTIPESLEHFSGEEGLRRQAIS | L | -0.3  | 4.7   |               |
| 24  | Cg1081    | 1 | 909.5647  | 10.1  | 78    | 85  | 0  | 35.2  | 27 | A | ILRPELGI                  | M | 0.8   | 6.98  |               |
| 24  | Cg1081    | 1 | 1093.5741 | 4.5   | 250   | 258 | 0  | 43.0  | 34 | I | RDNNHVRIA                 | T | -1.4  | 10.88 |               |
| 24  | Cg1081    | 1 | 1399.7824 | 0.3   | 230   | 242 | 0  | 86.4  | 35 | I | SFVLRGGQVELPV             | L | 0.6   | 6.98  |               |
| 24  | Cg1081    | 1 | 1779.9917 | -2.0  | 78    | 94  | 0  | 61.1  | 34 | A | ILRPELGIMLQSGGLPS         | Q | 0.5   | 6.98  |               |
| 24  | Cg1081    | 1 | 1785.9526 | -2.9  | 27    | 42  | 0  | 66.6  | 37 | G | LNFHVQRGEVFGLLGT          | N | 0.3   | 7.84  |               |
| 24  | Cg1081    | 1 | 1962.0898 | -3.2  | 116   | 132 | 0  | 104.9 | 35 | I | KDVLADVDLLHRENVKV         | G | -0.2  | 5.32  |               |
| 24  | Cg1081    | 1 | 2019.1113 | -2.1  | 116   | 133 | 0  | 75.9  | 35 | I | KDVLADVDLLHRENVKVG        | A | -0.2  | 5.32  |               |
| 25  | Cg1111    | 1 | 977.5698  | 8.1   | 126   | 133 | 0  | 43.2  | 30 | A | GLPLFRYI                  | G | 0.9   | 9.84  |               |
| 25  | Cg1111    | 1 | 1373.7456 | -19.7 | 126   | 138 | 0  | 53.7  | 37 | A | GLPLFRYIGGPNA             | H | 0.2   | 9.84  |               |
| 25  | Cg1111    | 1 | 1756.957  | 0.6   | 213   | 228 | 0  | 96.2  | 36 | G | STREALDLIVEAIEKA          | G | 0.1   | 4.16  |               |
| 25  | Cg1111    | 1 | 1919.0781 | -7.3  | 126   | 143 | 0  | 46.9  | 35 | A | GLPLFRYIGGPNAHVLPV        | P | 0.6   | 9.84  |               |
| 25  | Cg1111    | 1 | 2220.1902 | -4.5  | 397   | 416 | 0  | 57.0  | 37 | A | KYNQLLRIEQLLDAGVYAG       | R | -0.1  | 6.88  |               |
| 25  | Cg1111    | 1 | 2247.1535 | -5.5  | 305   | 324 | 0  | 47.3  | 38 | V | QIVGDDFFVTNPERLKEGIA      | K | -0.2  | 4.06  |               |
| 25  | Cg1111    | 1 | 2855.3308 | -7.5  | 67    | 92  | 0  | 133.0 | 35 | A | VENVNEEIGDELAGEADDQRLIDEA | M | -0.6  | 3.16  |               |
| 26  | Cg3186    | 1 | 897.5032  | -2.7  | 302   | 309 | 0  | 34.2  | 32 | A | RLQGLNPT                  | A | -0.8  | 11.04 |               |
| 26  | Cg3186    | 1 | 1000.5202 | 6.4   | 38    | 45  | 0  | 44.5  | 37 | A | ANRDWLRA                  | D | -1.2  | 10.88 |               |
| 26  | Cg3186    | 1 | 1196.605  | 1.4   | 191   | 200 | 0  | 67.1  | 35 | A | AKHPDQFRQA                | M | -1.7  | 10.08 |               |
| 26  | Cg3186    | 1 | 1223.536  | 4.0   | 242   | 250 | 0  | 34.1  | 33 | R | RFENDPFWN                 | M | -1.7  | 4.08  |               |
| 26  | Cg3186    | 1 | 1411.5979 | -5.8  | 242   | 252 | 0  | 35.9  | 30 | R | RFENDPFWNMG               | G | -1.3  | 4.08  |               |
| 26  | Cg3186    | 1 | 1414.6841 | -4.8  | 265   | 277 | 0  | 52.8  | 36 | A | SGLWSPQDDGVRV             | D | -0.6  | 3.88  |               |
| 26  | Cg3186    | 1 | 1652.7406 | -5.7  | 242   | 255 | 0  | 84.8  | 33 | R | RFENDPFWNMGGLA            | N | -0.6  | 4.08  |               |
| 26  | Cg3186    | 1 | 1668.7355 | -6.2  | 242   | 255 | 0  | 42.5  | 32 | R | RFENDPFWNMGGLA            | N | -0.6  | 4.08  | Oxidation (M) |
| 26  | Cg3186    | 1 | 2333.1375 | -3.6  | 236   | 255 | 0  | 77.2  | 37 | G | SIINPRRFENDPFWNMGGLA      | N | -0.5  | 7.04  |               |
| 27  | Cg0445    | 1 | 799.3501  | -8.8  | 134   | 141 | 0  | 34.8  | 30 | V | GGFNSFAT                  | R | 0.2   | 6.02  |               |
| 27  | Cg0445    | 1 | 1037.4454 | 8.3   | 173   | 181 | 0  | 45.3  | 33 | T | SFEHGEVYA                 | N | -0.4  | 4.24  |               |
| 27  | Cg0445    | 1 | 1061.5658 | 6.2   | 186   | 194 | 0  | 36.2  | 35 | A | SFSRWPVAI                 | W | 0.5   | 11.04 |               |
| 27  | Cg0445    | 1 | 1125.5455 | -8.6  | 131   | 141 | 0  | 80.8  | 35 | T | NLVGGFNSFAT               | R | 0.6   | 6.02  |               |
| 27  | Cg0445    | 1 | 1170.7012 | -1.5  | 241   | 251 | 0  | 46.3  | 32 | V | LIGNITIPFAI               | A | 1.8   | 6.02  |               |
| 27  | Cg0445    | 1 | 1230.7012 | -0.3  | 154   | 163 | 0  | 64.0  | 34 | A | FIIFHILDLT                | M | 1.9   | 4.94  |               |
| 27  | Cg0445    | 1 | 1239.6135 | -0.2  | 75    | 84  | 0  | 73.2  | 35 | V | DVYGEFLREI                | G | -0.1  | 3.82  |               |
| 27  | Cg0445    | 1 | 1306.583  | 2.1   | 170   | 181 | 0  | 57.4  | 34 | A | APTSFEHGEVYA              | N | -0.4  | 4.24  |               |
| 27  | Cg0445    | 1 | 1368.6786 | 0.7   | 131   | 143 | 0  | 72.5  | 36 | T | NLVGGFNSFATRS             | M | 0.1   | 11.04 |               |
| 27  | Cg0445    | 1 | 1412.8    | 0.1   | 217   | 228 | 0  | 52.7  | 35 | S | DLGITGRRWRAI              | L | -0.4  | 12.1  |               |
| 27  | Cg0445    | 1 | 1466.7405 | 0.7   | 73    | 84  | 0  | 81.4  | 36 | A | QVDVYGEFLREI              | G | -0.1  | 3.82  |               |

| hit | accession | z | mass      | ppm  | start | end | mc | score | id | - | sequence                       | + | gravy | pl    | modification  |
|-----|-----------|---|-----------|------|-------|-----|----|-------|----|---|--------------------------------|---|-------|-------|---------------|
| 28  | Cg0924    | 1 | 922.48    | -4.0 | 225   | 232 | 0  | 35.7  | 34 | T | YGPIFDLV                       | G | 1.1   | 3.1   |               |
| 28  | Cg0924    | 1 | 1030.5923 | -1.2 | 123   | 131 | 0  | 42.1  | 34 | S | LIINGQRFA                      | Q | 0.6   | 11.04 |               |
| 28  | Cg0924    | 1 | 1179.6288 | -1.9 | 223   | 232 | 0  | 53.9  | 35 | G | RTYGPIFDLV                     | G | 0.3   | 6.7   |               |
| 28  | Cg0924    | 1 | 1206.588  | 4.5  | 182   | 192 | 0  | 42.7  | 36 | I | VADFESALERA                    | K | 0.0   | 3.82  |               |
| 28  | Cg0924    | 1 | 1737.8421 | -2.0 | 148   | 162 | 0  | 40.8  | 36 | V | ELDPRDGEPLDQELI                | R | -1.1  | 3.38  |               |
| 28  | Cg0924    | 1 | 1863.8486 | -1.8 | 163   | 179 | 0  | 129.0 | 34 | I | RQAETLGEIFGEEEDAA              | K | -0.8  | 3.5   |               |
| 28  | Cg0924    | 1 | 1930.9901 | 5.6  | 67    | 82  | 0  | 47.1  | 37 | T | DNRAFELDRWGVVELV               | A | -0.2  | 4.06  |               |
| 28  | Cg0924    | 1 | 1935.9789 | -4.2 | 146   | 162 | 0  | 83.6  | 37 | T | VVELDPRDGEPLDQELI              | R | -0.5  | 3.38  |               |
| 28  | Cg0924    | 1 | 2032.0378 | -4.8 | 66    | 82  | 0  | 49.8  | 37 | A | TDNRAFELDRWGVVELV              | A | -0.2  | 4.06  |               |
| 28  | Cg0924    | 1 | 2174.112  | -5.1 | 64    | 82  | 0  | 79.7  | 38 | V | AATDNRAFELDRWGVVELV            | A | 0.0   | 4.06  |               |
| 29  | Cg2196    | 1 | 959.3508  | 11.0 | 58    | 65  | 0  | 41.4  | 25 | E | YEGDQEGY                       | G | -2.2  | 2.94  |               |
| 29  | Cg2196    | 1 | 1457.6899 | 3.1  | 74    | 85  | 0  | 39.3  | 35 | S | RDDSGEEVPRWL                   | E | -1.6  | 4.06  |               |
| 29  | Cg2196    | 1 | 1544.7219 | 6.8  | 73    | 85  | 0  | 48.1  | 35 | S | SRDDSGEEVPRWL                  | E | -1.5  | 4.06  |               |
| 29  | Cg2196    | 1 | 1687.7802 | 0.4  | 74    | 87  | 0  | 48.8  | 35 | S | RDDSGEEVPRWLET                 | W | -1.6  | 3.92  |               |
| 29  | Cg2196    | 1 | 1774.8122 | 4.5  | 73    | 87  | 0  | 43.0  | 35 | S | SRDDSGEEVPRWLET                | W | -1.6  | 3.92  |               |
| 29  | Cg2196    | 1 | 1996.7235 | 27.6 | 50    | 65  | 0  | 146.1 | 22 | S | SWNDYNEEYEGDQEGY               | G | -2.4  | 2.76  |               |
| 29  | Cg2196    | 1 | 2007.8923 | 7.0  | 68    | 85  | 0  | 56.8  | 34 | I | DGFGSSRDDSGEEVPRWL             | E | -1.2  | 3.84  |               |
| 29  | Cg2196    | 1 | 2237.9825 | 2.3  | 68    | 87  | 0  | 33.1  | 32 | I | DGFGSSRDDSGEEVPRWLET           | W | -1.3  | 3.76  |               |
| 29  | Cg2196    | 1 | 2318.3766 | 2.4  | 99    | 119 | 0  | 87.7  | 29 | T | SVLGLVVPVNFVFLKYNGLIK          | - | 1.3   | 10.18 |               |
| 29  | Cg2196    | 1 | 3006.4723 | 5.0  | 73    | 98  | 0  | 39.4  | 38 | S | SRDDSGEEVPRWLETWGKVFDAIT       | S | -0.6  | 4.06  |               |
| 30  | Cg2405    | 1 | 1349.6472 | -1.9 | 223   | 234 | 0  | 59.3  | 36 | A | MLTGPNMPKFS                    | D | -0.5  | 10.1  |               |
| 30  | Cg2405    | 1 | 1522.6899 | -1.6 | 162   | 174 | 0  | 40.4  | 34 | M | EELRGENYDQGIT                  | S | -1.5  | 3.68  |               |
| 30  | Cg2405    | 1 | 1653.7304 | 0.2  | 161   | 174 | 0  | 70.1  | 33 | A | MEELRGENYDQGIT                 | S | -1.3  | 3.68  |               |
| 30  | Cg2405    | 1 | 1936.9166 | 1.1  | 206   | 222 | 0  | 96.2  | 36 | G | KYAPNLDAANEQEIQQA              | M | -1.0  | 3.82  |               |
| 30  | Cg2405    | 1 | 2080.9701 | 1.8  | 204   | 222 | 0  | 99.7  | 36 | S | SGKYAPNLDAANEQEIQQA            | M | -1.0  | 3.82  |               |
| 30  | Cg2405    | 1 | 2517.0965 | 2.0  | 153   | 174 | 0  | 89.7  | 32 | V | YNEDGTLAMEELRGENYDQGIT         | S | -1.2  | 3.44  |               |
| 30  | Cg2405    | 1 | 3168.4306 | -5.3 | 145   | 174 | 0  | 41.1  | 33 | A | NGGGPGLVYNEDGTLAMEELRGENYDQGIT | S | -0.8  | 3.44  |               |
| 31  | Cg1437    | 1 | 1202.5204 | 1.6  | 309   | 318 | 0  | 44.1  | 32 | A | SYNNHPIEET                     | G | -1.7  | 4.24  |               |
| 31  | Cg1437    | 1 | 1293.6717 | 1.4  | 257   | 268 | 0  | 69.5  | 36 | A | EFGGYLSGPRVI                   | D | 0.2   | 6.88  |               |
| 31  | Cg1437    | 1 | 1296.6826 | -1.1 | 101   | 113 | 0  | 53.1  | 35 | N | AGDALLFGHGLNI                  | H | 0.8   | 4.94  |               |
| 31  | Cg1437    | 1 | 1364.7088 | -2.9 | 256   | 268 | 0  | 66.0  | 36 | T | AEFGGYLSGPRVI                  | D | 0.3   | 6.88  |               |
| 31  | Cg1437    | 1 | 1551.8297 | -5.0 | 114   | 127 | 0  | 100.3 | 36 | I | HFDLIKPADDIIVG                 | M | 0.5   | 4.16  |               |
| 31  | Cg1437    | 1 | 2196.0308 | -0.9 | 25    | 45  | 0  | 65.1  | 36 | V | YGGSQGHASQNLRDGSEVV            | I | -0.7  | 6.02  |               |
| 31  | Cg1437    | 1 | 2370.1373 | -2.3 | 269   | 289 | 0  | 104.8 | 37 | I | DADTKSRMKDILTDIQDGTFT          | K | -0.9  | 4.04  |               |
| 31  | Cg1437    | 1 | 2454.2179 | 4.5  | 91    | 113 | 0  | 46.7  | 38 | I | FTNDIEPNLNAGDALLFGHGLNI        | H | 0.1   | 3.7   |               |
| 31  | Cg1437    | 1 | 2696.3446 | -7.4 | 89    | 113 | 0  | 94.3  | 38 | A | EIFTNDIEPNLNAGDALLFGHGLNI      | H | 0.1   | 3.58  |               |
| 32  | Cg3227    | 1 | 728.3051  | 18.1 | 184   | 189 | 0  | 34.9  | 31 | L | MFTVDT                         | P | 0.7   | 3.1   | Oxidation (M) |
| 32  | Cg3227    | 1 | 1152.6233 | -0.5 | 218   | 225 | 0  | 36.6  | 34 | A | IPRPWWWI                       | D | -0.2  | 11.04 |               |
| 32  | Cg3227    | 1 | 1337.7033 | 2.8  | 216   | 225 | 0  | 53.0  | 35 | L | NAIPRPWWWI                     | D | -0.3  | 11.04 |               |
| 32  | Cg3227    | 1 | 1372.6663 | -0.4 | 72    | 82  | 0  | 63.5  | 36 | A | FENIEFHPDIL                    | K | 0.0   | 3.82  |               |

| hit | accession | z | mass      | ppm   | start | end  | mc | score | id | - | sequence                | + | gravy | pl    | modification  |
|-----|-----------|---|-----------|-------|-------|------|----|-------|----|---|-------------------------|---|-------|-------|---------------|
| 32  | Cg3227    | 1 | 1450.7874 | -3.7  | 215   | 225  | 0  | 49.9  | 35 | V | LNAIRPWVWVI             | D | 0.1   | 11.04 |               |
| 32  | Cg3227    | 1 | 1650.9035 | 1.2   | 213   | 225  | 0  | 46.0  | 35 | S | TVLNAIRPWVWVI           | D | 0.3   | 11.04 |               |
| 32  | Cg3227    | 1 | 1825.9668 | -1.8  | 215   | 228  | 0  | 37.2  | 37 | V | LNAIRPWVWVDFL           | T | 0.3   | 6.78  |               |
| 32  | Cg3227    | 1 | 2426.2787 | -0.9  | 213   | 232  | 0  | 54.0  | 37 | S | TVLNAIRPWVWVDFLTTPT     | L | 0.2   | 6.78  |               |
| 33  | Cg0756    | 1 | 982.4701  | 2.7   | 499   | 505  | 0  | 37.0  | 34 | A | FWYHFAI                 | M | 0.9   | 7.76  |               |
| 33  | Cg0756    | 1 | 1039.5743 | -3.8  | 354   | 362  | 0  | 37.0  | 33 | S | GSLFPFLFI               | T | 2.0   | 6.02  |               |
| 33  | Cg0756    | 1 | 1273.6489 | -2.4  | 329   | 339  | 0  | 67.6  | 37 | I | LFARPEVQMPS             | V | -0.1  | 6.98  |               |
| 33  | Cg0756    | 1 | 1289.6438 | -3.6  | 329   | 339  | 0  | 40.8  | 37 | I | LFARPEVQMPS             | V | -0.1  | 6.98  | Oxidation (M) |
| 33  | Cg0756    | 1 | 1376.6183 | 2.1   | 743   | 754  | 0  | 64.6  | 34 | A | MWDERYPGGAPV            | S | -0.8  | 4.08  |               |
| 33  | Cg0756    | 1 | 1392.7224 | 1.0   | 414   | 424  | 0  | 41.2  | 36 | A | VILDRHLYFSM             | N | 0.7   | 7.76  |               |
| 33  | Cg0756    | 1 | 1446.7871 | 0.6   | 303   | 314  | 0  | 39.8  | 35 | V | WLLAPRDYLSL             | F | 0.3   | 6.7   |               |
| 33  | Cg0756    | 1 | 1463.7595 | -1.4  | 413   | 424  | 0  | 43.9  | 36 | T | AVILDRHLYFSM            | N | 0.8   | 7.76  |               |
| 33  | Cg0756    | 1 | 1473.765  | -1.6  | 329   | 341  | 0  | 42.4  | 37 | I | LFARPEVQMPSVT           | S | 0.2   | 6.98  |               |
| 34  | Cg0766    | 1 | 1121.5506 | 0.3   | 596   | 604  | 0  | 43.2  | 36 | L | RWDSLGEFL               | A | -0.4  | 4.08  |               |
| 34  | Cg0766    | 1 | 1192.5877 | -0.6  | 596   | 605  | 0  | 64.2  | 36 | L | RWDSLGEFLA              | L | -0.1  | 4.08  |               |
| 34  | Cg0766    | 1 | 1365.6929 | -5.2  | 542   | 552  | 0  | 38.1  | 36 | V | LRDYNTDLFPI             | L | -0.3  | 3.88  |               |
| 34  | Cg0766    | 1 | 1578.8042 | -1.0  | 540   | 552  | 0  | 60.5  | 37 | G | NVLRDYNTDLFPI           | L | -0.2  | 3.88  |               |
| 34  | Cg0766    | 1 | 1635.8257 | -3.1  | 539   | 552  | 0  | 73.4  | 37 | T | GNVLRDYNTDLFPI          | L | -0.2  | 3.88  |               |
| 34  | Cg0766    | 1 | 1922.9738 | -1.7  | 536   | 552  | 0  | 60.5  | 37 | I | SVTGNVLRDYNTDLFPI       | L | 0.0   | 3.88  |               |
| 34  | Cg0766    | 1 | 2271.1634 | -5.3  | 496   | 515  | 0  | 104.3 | 38 | A | SLVEKYLADHDTGLDIQIL     | S | -0.1  | 3.84  |               |
| 35  | Cg2743    | 1 | 1216.6968 | 0.9   | 2142  | 2152 | 0  | 49.5  | 33 | T | LLFPFAAPRVS             | G | 1.1   | 11.04 |               |
| 35  | Cg2743    | 1 | 1557.794  | -1.0  | 316   | 330  | 0  | 46.6  | 37 | A | GARWFLDVGPDDGIV         | K | 0.4   | 3.88  |               |
| 35  | Cg2743    | 1 | 2002.0081 | -3.7  | 1231  | 1248 | 0  | 58.6  | 37 | T | MLAPVLPGEIEFSVERS       | A | 0.2   | 3.8   |               |
| 35  | Cg2743    | 1 | 2497.1624 | 8.0   | 705   | 724  | 0  | 42.3  | 36 | V | YFGDIGSMTYEQWLNRYLEL    | S | -0.4  | 3.82  |               |
| 36  | Cg1290    | 1 | 1180.6492 | 0.8   | 188   | 196  | 0  | 54.0  | 34 | A | LFEVYERLI               | K | 0.7   | 4.26  |               |
| 36  | Cg1290    | 1 | 1491.8297 | -3.4  | 584   | 596  | 0  | 71.6  | 34 | I | QVDEPAIRELLPL           | R | 0.0   | 3.82  |               |
| 36  | Cg1290    | 1 | 1589.7613 | 10.6  | 479   | 492  | 0  | 79.5  | 37 | V | QYFSELLDGFLSTA          | N | 0.3   | 3     |               |
| 36  | Cg1290    | 1 | 1598.7576 | -5.2  | 328   | 340  | 0  | 56.5  | 35 | L | EAENIEPEVRDWL           | A | -1.1  | 3.58  |               |
| 36  | Cg1290    | 1 | 1669.7947 | -4.2  | 328   | 341  | 0  | 46.1  | 35 | L | EAENIEPEVRDWLA          | F | -0.9  | 3.58  |               |
| 36  | Cg1290    | 1 | 2334.1492 | 2.1   | 77    | 97   | 0  | 47.6  | 38 | I | LGVLPERFDDIADHENDGLPL   | W | -0.4  | 3.68  |               |
| 36  | Cg1290    | 1 | 2518.2704 | -3.6  | 75    | 97   | 0  | 57.0  | 38 | A | AILGVLPERFDDIADHENDGLPL | W | -0.1  | 3.68  |               |
| 37  | Cg1790    | 1 | 906.4058  | 2.4   | 322   | 329  | 0  | 35.8  | 34 | I | FWNGPMGV                | F | 0.3   | 6.02  |               |
| 37  | Cg1790    | 1 | 1455.747  | -5.7  | 369   | 381  | 0  | 63.3  | 36 | V | RVLGLNEDGFSHI           | S | -0.1  | 5.22  |               |
| 37  | Cg1790    | 1 | 1612.8321 | 0.9   | 63    | 76   | 0  | 73.4  | 36 | A | HLGRPKGEVNEKYS          | L | -1.6  | 9.62  |               |
| 37  | Cg1790    | 1 | 1776.9734 | -29.5 | 6     | 21   | 0  | 96.4  | 37 | T | LKDLLDEGVDGRHVIV        | R | 0.1   | 4.44  |               |
| 37  | Cg1790    | 1 | 1846.8697 | -4.9  | 24    | 39   | 0  | 51.9  | 35 | S | DFNVPLNDDREITDKG        | R | -1.3  | 3.76  |               |
| 37  | Cg1790    | 1 | 1993.0745 | 0.4   | 63    | 80   | 0  | 73.8  | 36 | A | HLGRPKGEVNEKYS LAPV     | A | -0.8  | 9.62  |               |
| 37  | Cg1790    | 1 | 2090.0029 | 0.8   | 22    | 39   | 0  | 40.2  | 37 | V | RSDFNVPLNDDREITDKG      | R | -1.4  | 4.12  |               |
| 37  | Cg1790    | 1 | 2308.3042 | -12.3 | 172   | 192  | 0  | 108.3 | 35 | A | KLLPHYAGGLVETEISVLEKI   | A | 0.4   | 5.4   |               |
| 37  | Cg1790    | 1 | 2419.1543 | -9.3  | 278   | 298  | 0  | 58.9  | 36 | A | SEFNKDAEKQIVDLDSIPEGW   | M | -0.9  | 3.76  |               |

| hit | accession | z | mass      | ppm   | start | end | mc | score | id | - | sequence                      | + | gravy | pl    | modification |
|-----|-----------|---|-----------|-------|-------|-----|----|-------|----|---|-------------------------------|---|-------|-------|--------------|
| 38  | Cg1366    | 1 | 1092.5757 | -4.6  | 244   | 253 | 0  | 36.5  | 35 | A | GFKWLAPFAG                    | A | 0.6   | 10.1  |              |
| 38  | Cg1366    | 1 | 1139.5611 | 5.5   | 399   | 408 | 0  | 49.7  | 35 | A | AFRDLEAFAT                    | F | 0.3   | 4.08  |              |
| 38  | Cg1366    | 1 | 1163.6128 | 1.0   | 244   | 254 | 0  | 52.9  | 36 | A | GFKWLAPFAGA                   | A | 0.7   | 10.1  |              |
| 38  | Cg1366    | 1 | 1307.7085 | -0.2  | 139   | 149 | 0  | 45.3  | 35 | T | VLERQPVEEPL                   | A | -0.5  | 3.96  |              |
| 38  | Cg1366    | 1 | 1363.8048 | -7.1  | 285   | 296 | 0  | 45.0  | 31 | I | SLLRRPPGREA                   | Y | -0.7  | 12.1  |              |
| 38  | Cg1366    | 1 | 1422.8347 | -14.1 | 106   | 118 | 0  | 49.3  | 32 | A | FLGRVINPLGQPI                 | D | 0.6   | 11.04 |              |
| 38  | Cg1366    | 1 | 1477.7313 | 2.8   | 465   | 475 | 0  | 55.4  | 37 | V | RRFESELHEYL                   | G | -1.3  | 5.4   |              |
| 38  | Cg1366    | 1 | 1704.9046 | 1.0   | 135   | 149 | 0  | 43.4  | 36 | L | QAPTFLERQPVEEPL               | A | -0.6  | 3.96  |              |
| 38  | Cg1366    | 1 | 2320.1812 | -5.8  | 347   | 367 | 0  | 55.6  | 38 | I | SITDGQVFLESDFNRRGVRPA         | I | -0.2  | 4.3   |              |
| 39  | Cg2523    | 1 | 1833.8785 | 1.4   | 222   | 238 | 0  | 74.0  | 37 | M | HAAEPLPPTEDSPYLPT             | T | -0.8  | 3.82  |              |
| 39  | Cg2523    | 1 | 2475.1475 | 10.1  | 251   | 271 | 0  | 48.8  | 36 | V | EDIPEFNQLEIDLRDDIAEMA         | A | -0.6  | 3.24  |              |
| 39  | Cg2523    | 1 | 2481.2248 | -15.0 | 272   | 292 | 0  | 37.2  | 37 | A | AEFRERNLTSIIERNDDVYAA         | K | -0.7  | 4.28  |              |
| 39  | Cg2523    | 1 | 2490.1849 | -1.5  | 507   | 529 | 0  | 42.4  | 36 | I | GEDLGTFFEPWVQDALAQRGIMGT      | S | -0.3  | 3.58  |              |
| 39  | Cg2523    | 1 | 2801.4058 | -4.9  | 504   | 529 | 0  | 59.0  | 38 | A | VVIGEDLGTFFEPWVQDALAQRGIMGT   | S | 0.3   | 3.58  |              |
| 39  | Cg2523    | 1 | 2929.4644 | -3.0  | 502   | 529 | 0  | 99.3  | 38 | A | GAVVIGEDLGTFFEPWVQDALAQRGIMGT | S | 0.3   | 3.58  |              |
| 40  | Cg2958    | 1 | 1138.5982 | 6.5   | 220   | 230 | 0  | 35.1  | 34 | A | LGRPSVPEDVA                   | G | -0.2  | 4.08  |              |
| 40  | Cg2958    | 1 | 1160.6666 | -1.0  | 158   | 168 | 0  | 50.8  | 33 | T | KFAVRGLTQAA                   | A | 0.3   | 11.48 |              |
| 40  | Cg2958    | 1 | 1162.6234 | -5.8  | 56    | 66  | 0  | 81.8  | 36 | A | VFVGLDVTDKA                   | N | 0.8   | 3.88  |              |
| 40  | Cg2958    | 1 | 1407.7722 | -13.6 | 220   | 233 | 0  | 61.8  | 35 | A | LGRPSVPEDVAGLV                | S | 0.4   | 4.08  |              |
| 40  | Cg2958    | 1 | 1481.715  | 8.2   | 203   | 215 | 0  | 41.9  | 36 | I | NGKPIGENFKEYS                 | S | -1.5  | 7     |              |
| 40  | Cg2958    | 1 | 1588.9301 | -7.0  | 124   | 137 | 0  | 57.7  | 32 | A | SRKFDDELGVKGI                 | N | -0.4  | 10.32 |              |
| 40  | Cg2958    | 1 | 1655.7791 | -6.8  | 203   | 217 | 0  | 91.8  | 35 | I | NGKPIGENFKEYSSS               | I | -1.4  | 7     |              |
| 40  | Cg2958    | 1 | 1809.9261 | -1.9  | 201   | 216 | 0  | 56.0  | 37 | S | KINGKPIGENFKEYSS              | S | -1.2  | 9.56  |              |
| 40  | Cg2958    | 1 | 1896.9581 | -3.0  | 201   | 217 | 0  | 75.8  | 37 | S | KINGKPIGENFKEYSSS             | I | -1.2  | 9.56  |              |
| 41  | Cg2499    | 1 | 1311.6935 | 5.9   | 250   | 259 | 0  | 38.5  | 35 | L | RLYEHPQEKL                    | S | -1.7  | 7.74  |              |
| 41  | Cg2499    | 1 | 1727.7944 | -1.4  | 307   | 319 | 0  | 82.3  | 34 | S | FFDQETNERWIPF                 | V | -0.9  | 3.82  |              |
| 41  | Cg2499    | 1 | 1939.9469 | -4.2  | 307   | 321 | 0  | 42.1  | 37 | S | FFDQETNERWIPFVI               | E | -0.2  | 3.82  |              |
| 41  | Cg2499    | 1 | 1998.9759 | -16.3 | 339   | 356 | 0  | 42.1  | 36 | A | YHEDEAPNSKGGVDKRVV            | L | -1.3  | 5.38  |              |
| 41  | Cg2499    | 1 | 2157.0378 | -25.2 | 147   | 165 | 0  | 103.3 | 34 | T | FLGPVDDEEGLHYLRPETA           | Q | -0.6  | 3.92  |              |
| 41  | Cg2499    | 1 | 2237.0793 | -4.6  | 307   | 324 | 0  | 95.0  | 37 | S | FFDQETNERWIPFVIEPA            | A | -0.4  | 3.68  |              |
| 42  | Cg1429    | 1 | 906.4811  | 12.9  | 122   | 130 | 0  | 59.1  | 34 | V | PPAPPTQVT                     | R | -0.6  | 6.02  |              |
| 42  | Cg1429    | 1 | 1457.7263 | -0.5  | 71    | 83  | 0  | 54.8  | 36 | T | AFERPDNQSAPKV                 | A | -1.2  | 7.02  |              |
| 42  | Cg1429    | 1 | 1461.5936 | -1.6  | 147   | 159 | 0  | 57.5  | 28 | S | YSEPYTDSDFAPA                 | G | -0.9  | 2.88  |              |
| 42  | Cg1429    | 1 | 1471.6579 | 1.2   | 134   | 146 | 0  | 35.0  | 33 | I | SRPEEPGYQPEPS                 | Y | -2.2  | 3.96  |              |
| 42  | Cg1429    | 1 | 1524.6845 | -2.4  | 277   | 290 | 0  | 91.1  | 33 | V | NTHGEGWGELSEPL                | M | -1.1  | 3.96  |              |
| 42  | Cg1429    | 1 | 1712.8006 | -7.9  | 132   | 146 | 0  | 42.1  | 35 | R | QISRPEEPGYQPEPS               | Y | -1.8  | 3.96  |              |
| 42  | Cg1429    | 1 | 1868.9017 | -0.2  | 131   | 146 | 0  | 43.1  | 36 | T | RQISRPEEPGYQPEPS              | Y | -2.0  | 4.56  |              |
| 42  | Cg1429    | 1 | 2603.1372 | 1.3   | 6     | 28  | 0  | 176.3 | 32 | S | RNSNQNFQPDNLNDDDDSAIPT        | Y | -1.5  | 3.22  |              |
| 43  | Cg1791    | 1 | 1551.7603 | -2.6  | 165   | 178 | 0  | 39.7  | 36 | V | LNDKFGIENGLMTT                | V | -0.2  | 4.08  |              |
| 43  | Cg1791    | 1 | 1737.8057 | -4.1  | 54    | 68  | 0  | 41.5  | 35 | G | RLGQVEYDDDSITV                | G | -0.8  | 3.42  |              |

| hit | accession | z | mass      | ppm   | start | end | mc | score | id | - | sequence                       | + | gravy | pl    | modification |
|-----|-----------|---|-----------|-------|-------|-----|----|-------|----|---|--------------------------------|---|-------|-------|--------------|
| 43  | Cg1791    | 1 | 2364.4144 | -6.0  | 218   | 239 | 0  | 74.9  | 30 | V | ALVLPKLGKLDGYALRVPVIT          | G | 0.7   | 9.62  |              |
| 43  | Cg1791    | 1 | 2463.4828 | -9.2  | 217   | 239 | 0  | 77.6  | 29 | A | VALVLPKLGKLDGYALRVPVIT         | G | 0.8   | 9.62  |              |
| 43  | Cg1791    | 1 | 2907.5012 | 0.2   | 34    | 59  | 0  | 86.4  | 38 | V | NDLTDNKTLLKFDKSIMGRGQEV        | E | -0.3  | 4.46  |              |
| 43  | Cg1791    | 1 | 3077.6067 | -17.5 | 32    | 59  | 0  | 96.7  | 38 | V | AVNDLTDNKTLLKFDKSIMGRGQEV      | E | -0.1  | 4.46  |              |
| 44  | Cg1001    | 1 | 1008.5505 | 3.4   | 5     | 12  | 0  | 34.1  | 33 | G | FRDFVLRG                       | N | 0.1   | 10.88 |              |
| 44  | Cg1001    | 1 | 1425.8052 | -7.5  | 125   | 135 | 0  | 65.2  | 35 | I | RDLLQEQQRLQ                    | - | -1.7  | 10.08 |              |
| 44  | Cg1001    | 1 | 1444.7198 | -2.1  | 45    | 58  | 0  | 85.4  | 37 | A | SIGSTEVEGLGFHI                 | R | 0.4   | 4.24  |              |
| 44  | Cg1001    | 1 | 1768.9795 | -5.0  | 122   | 135 | 0  | 83.3  | 36 | L | TEIRDLLQEQQRLQ                 | - | -1.3  | 7.14  |              |
| 44  | Cg1001    | 1 | 2124.1902 | -3.2  | 119   | 135 | 0  | 106.8 | 35 | A | ELLTEIRDLLQEQQRLQ              | - | -0.9  | 4.64  |              |
| 44  | Cg1001    | 1 | 2524.386  | -8.9  | 115   | 135 | 0  | 119.8 | 37 | A | SIEAELLTEIRDLLQEQQRLQ          | - | -0.6  | 4.36  |              |
| 45  | Cg2211    | 1 | 1152.5941 | 4.6   | 26    | 34  | 0  | 44.3  | 35 | A | WGWHLKRN                       | T | -1.5  | 11.48 |              |
| 45  | Cg2211    | 1 | 1416.5946 | 22.9  | 98    | 109 | 0  | 64.6  | 33 | V | GHVEPDWYDQA                    | T | -1.3  | 3.7   |              |
| 45  | Cg2211    | 1 | 1475.7369 | -4.9  | 114   | 126 | 0  | 60.1  | 37 | G | TWGNLTDSQLRSV                  | N | -0.6  | 6.78  |              |
| 45  | Cg2211    | 1 | 1532.7583 | -2.9  | 113   | 126 | 0  | 97.9  | 37 | T | GTWGNLTDSQLRSV                 | N | -0.6  | 6.78  |              |
| 45  | Cg2211    | 1 | 1614.8002 | 1.0   | 2     | 16  | 0  | 64.2  | 37 | M | AGSSHTIEPIYRGV                 | S | -0.4  | 5.3   |              |
| 45  | Cg2211    | 1 | 1847.9378 | -1.6  | 110   | 126 | 0  | 116.7 | 37 | A | TLTGTWGNLTDSQLRSV              | N | -0.3  | 6.78  |              |
| 45  | Cg2211    | 1 | 2199.0345 | -2.1  | 91    | 109 | 0  | 63.9  | 36 | I | TSRNKPVGHVEPDWYDQA             | T | -1.4  | 5.28  |              |
| 45  | Cg2211    | 1 | 2486.1925 | 0.1   | 2     | 25  | 0  | 40.1  | 37 | M | AGSSHTIEPIYRGVSTLDEPSAA        | W | -0.4  | 4.16  |              |
| 46  | Cg1737    | 1 | 997.6172  | -25.8 | 43    | 51  | 0  | 37.8  | 32 | S | LKVLGENLL                      | R | 0.9   | 6.94  |              |
| 46  | Cg1737    | 1 | 1249.7255 | -1.7  | 372   | 382 | 0  | 37.9  | 31 | S | IAGPKRPQDRI                    | L | -1.2  | 11.32 |              |
| 46  | Cg1737    | 1 | 1254.7085 | -6.5  | 170   | 181 | 0  | 49.4  | 34 | S | NFRVPPGTGIV                    | H | 0.6   | 11.04 |              |
| 46  | Cg1737    | 1 | 1395.7834 | -7.5  | 768   | 779 | 0  | 64.9  | 34 | A | NIRLQNQLVDIA                   | G | 0.1   | 6.78  |              |
| 46  | Cg1737    | 1 | 1525.6797 | -1.2  | 780   | 793 | 0  | 78.0  | 33 | A | GGYTRDFTQEGAPQ                 | A | -1.4  | 4.08  |              |
| 46  | Cg1737    | 1 | 1604.8021 | -10.5 | 686   | 699 | 0  | 57.5  | 37 | I | RKAPYFDGMPVEPV                 | A | -0.5  | 6.94  |              |
| 47  | Cg0953    | 1 | 1096.6645 | -3.4  | 498   | 507 | 0  | 41.0  | 31 | A | IFPLKNPGLV                     | S | 0.8   | 10.1  |              |
| 47  | Cg0953    | 1 | 1234.7034 | -0.8  | 326   | 338 | 0  | 38.7  | 33 | A | ALVGPDRVIAAPG                  | A | 0.8   | 6.78  |              |
| 47  | Cg0953    | 1 | 1386.6966 | -2.2  | 516   | 528 | 0  | 63.7  | 36 | A | GWIGTLVGKPDNM                  | D | -0.1  | 6.76  |              |
| 47  | Cg0953    | 1 | 1456.8514 | -2.7  | 122   | 133 | 0  | 35.5  | 33 | A | DVLSFRLRQKPV                   | R | -0.3  | 11.32 |              |
| 47  | Cg0953    | 1 | 1800.8716 | -0.3  | 516   | 532 | 0  | 64.7  | 36 | A | GWIGTLVGKPDNMDDLA              | A | -0.1  | 3.6   |              |
| 47  | Cg0953    | 1 | 2259.1939 | -7.0  | 442   | 460 | 0  | 63.3  | 37 | A | SANLPTILYSLYWKKFNTT            | G | -0.2  | 9.94  |              |
| 48  | Cg0576    | 1 | 1515.8045 | -4.7  | 14    | 27  | 0  | 41.6  | 37 | T | KSVVDIPGAPQRYS                 | F | -0.5  | 9.72  |              |
| 48  | Cg0576    | 1 | 1768.957  | -2.3  | 70    | 85  | 0  | 63.2  | 36 | A | RVTSGLENILEELSPI               | Q | 0.1   | 3.96  |              |
| 48  | Cg0576    | 1 | 2012.9844 | -2.7  | 230   | 246 | 0  | 74.2  | 37 | A | LGWTTQITERFGFSEI               | M | -0.3  | 3.96  |              |
| 48  | Cg0576    | 1 | 3125.6073 | 1.9   | 32    | 59  | 0  | 94.0  | 38 | V | SAPIEVPGLLDLQLDSYSWLIGTPEWRA   | R | 0.1   | 3.58  |              |
| 49  | Cg0737    | 1 | 1494.7678 | -4.8  | 275   | 288 | 0  | 49.7  | 36 | T | SVPVDRPGADLQEI                 | L | -0.3  | 3.7   |              |
| 49  | Cg0737    | 1 | 1504.8038 | -5.2  | 253   | 264 | 0  | 75.4  | 36 | A | RLVELWHDPEVL                   | A | -0.1  | 4.42  |              |
| 49  | Cg0737    | 1 | 1652.8522 | -6.7  | 84    | 97  | 0  | 110.4 | 36 | A | LAQDQLDVNLFQHL                 | K | 0.0   | 3.88  |              |
| 49  | Cg0737    | 1 | 2002.9272 | 9.1   | 123   | 140 | 0  | 108.7 | 36 | L | ALFWKDHSIDGIDGESV              | A | -0.4  | 3.76  |              |
| 49  | Cg0737    | 1 | 3336.6011 | 4.0   | 123   | 153 | 0  | 54.7  | 38 | L | ALFWKDHSIDGIDGESVAIPNDPSNQGRAI | N | -0.5  | 3.92  |              |
| 50  | Cg1685    | 1 | 1262.568  | -4.6  | 74    | 83  | 0  | 69.2  | 34 | N | FEQHYQQQQV                     | Q | -1.5  | 5.12  |              |



| hit | accession | z | mass      | ppm   | start | end | mc | score | id | - | sequence                 | + | gravy | pl    | modification |
|-----|-----------|---|-----------|-------|-------|-----|----|-------|----|---|--------------------------|---|-------|-------|--------------|
| 50  | Cg1685    | 1 | 1598.7437 | 1.4   | 84    | 96  | 0  | 68.2  | 35 | V | QQPQNPQTPDYRQ            | N | -2.8  | 6.7   |              |
| 50  | Cg1685    | 1 | 1671.7277 | -0.1  | 68    | 81  | 0  | 69.2  | 32 | I | EAPQPNFEQHYQQG           | Q | -2.0  | 4.24  |              |
| 50  | Cg1685    | 1 | 1898.8547 | -0.2  | 68    | 83  | 0  | 92.8  | 34 | I | EAPQPNFEQHYQQQV          | Q | -1.7  | 4.24  |              |
| 50  | Cg1685    | 1 | 2263.0465 | -6.8  | 46    | 65  | 0  | 64.6  | 34 | M | NKDGDTPEQQQPQQQIAPN      | Q | -2.3  | 3.7   |              |
| 50  | Cg1685    | 1 | 2504.1891 | 7.3   | 46    | 67  | 0  | 57.0  | 37 | M | NKDGDTPEQQQPQQQIAPNQI    | E | -2.0  | 3.7   |              |
| 50  | Cg1685    | 1 | 2588.164  | 8.4   | 84    | 104 | 0  | 35.3  | 35 | V | QQPQNPQTPDYRQNYEDPNRT    | S | -2.8  | 4.3   |              |
| 50  | Cg1685    | 1 | 2675.196  | 3.1   | 84    | 105 | 0  | 38.3  | 34 | V | QQPQNPQTPDYRQNYEDPNRTS   | - | -2.7  | 4.3   |              |
| 51  | Cg2444    | 1 | 957.4781  | 1.5   | 150   | 158 | 0  | 51.3  | 35 | G | DFGGPRGPR                | G | -1.6  | 10.88 |              |
| 51  | Cg2444    | 1 | 1267.6534 | -1.7  | 150   | 161 | 0  | 43.7  | 35 | G | DFGGPRGPRGPR             | N | -1.7  | 12.1  |              |
| 51  | Cg2444    | 1 | 1671.7794 | 0.2   | 159   | 175 | 0  | 66.4  | 35 | R | GPRNDGPFPGPFPGPG         | Y | -0.8  | 6.78  |              |
| 51  | Cg2444    | 1 | 1701.7006 | 21.8  | 97    | 110 | 0  | 73.2  | 32 | I | YADDLIDEDEDYRA           | Q | -1.4  | 3.22  |              |
| 51  | Cg2444    | 1 | 1800.8853 | 5.2   | 115   | 130 | 0  | 46.0  | 37 | S | QINDEVINEIRDGISS         | F | -0.6  | 3.58  |              |
| 51  | Cg2444    | 1 | 1834.8428 | 0.1   | 159   | 176 | 0  | 51.5  | 35 | R | GPRNDGPFPGPFPGPGY        | R | -0.8  | 6.7   |              |
| 51  | Cg2444    | 1 | 2138.0123 | -4.6  | 162   | 181 | 0  | 63.7  | 36 | R | NDGPFPGPFPGPGYRGRPF      | - | -0.8  | 9.84  |              |
| 51  | Cg2444    | 1 | 2332.1547 | -3.0  | 115   | 135 | 0  | 48.0  | 37 | S | QINDEVINEIRDGISSFVDGI    | V | -0.1  | 3.42  |              |
| 52  | Cg0545    | 1 | 962.5338  | 5.8   | 242   | 249 | 0  | 38.2  | 34 | T | YLGWVRVI                 | R | 0.6   | 9.84  |              |
| 52  | Cg0545    | 1 | 1041.5607 | -1.1  | 115   | 125 | 0  | 83.9  | 35 | S | SHALFGGLIGA              | A | 1.2   | 7.84  |              |
| 52  | Cg0545    | 1 | 1426.6881 | 6.8   | 217   | 229 | 0  | 64.9  | 36 | T | GHLGTDADIPFWV            | K | 0.2   | 3.88  |              |
| 52  | Cg0545    | 1 | 1671.8064 | -0.2  | 411   | 425 | 0  | 83.4  | 36 | A | AQAVQDLNNEVTK            | - | -1.1  | 3.82  |              |
| 53  | Cg3079    | 1 | 1317.6929 | -4.0  | 753   | 763 | 0  | 41.8  | 37 | V | IFDRLSPEQLT              | S | -0.3  | 4.08  |              |
| 53  | Cg3079    | 1 | 1407.7762 | -0.9  | 686   | 697 | 0  | 67.0  | 34 | A | HPDVFDILLQVL             | D | 1.0   | 3.88  |              |
| 53  | Cg3079    | 1 | 1640.9461 | -17.1 | 764   | 777 | 0  | 42.9  | 35 | T | SIVDIQIKQLTDRL           | A | 0.1   | 6.9   |              |
| 53  | Cg3079    | 1 | 1708.8672 | 10.9  | 686   | 700 | 0  | 90.1  | 36 | A | HPDVFDILLQVLDEG          | R | 0.3   | 3.5   |              |
| 53  | Cg3079    | 1 | 2079.1001 | 0.6   | 686   | 703 | 0  | 82.1  | 37 | A | HPDVFDILLQVLDEGRLT       | D | 0.2   | 3.96  |              |
| 53  | Cg3079    | 1 | 2792.4457 | -0.1  | 686   | 710 | 0  | 50.6  | 38 | A | HPDVFDILLQVLDEGRLTGQGRTV | D | -0.2  | 4.12  |              |
| 54  | Cg1880    | 1 | 1270.671  | 4.5   | 565   | 575 | 0  | 47.5  | 36 | A | LFGSIERFFGV              | L | 1.0   | 6.98  |              |
| 54  | Cg1880    | 1 | 1496.8391 | 0.6   | 565   | 577 | 0  | 46.5  | 34 | A | LFGSIERFFGVLL            | E | 1.5   | 6.98  |              |
| 54  | Cg1880    | 1 | 1517.7038 | 1.6   | 459   | 470 | 0  | 47.8  | 35 | L | RDYGLDDFYLEL             | S | -0.6  | 3.5   |              |
| 54  | Cg1880    | 1 | 1632.7995 | -2.9  | 479   | 492 | 0  | 48.5  | 37 | S | VGSDEIWERSTEIL           | N | -0.4  | 3.68  |              |
| 54  | Cg1880    | 1 | 1743.8719 | -0.2  | 457   | 470 | 0  | 63.3  | 37 | S | LLRDYGLDDFYLEL           | S | 0.0   | 3.5   |              |
| 54  | Cg1880    | 1 | 1830.904  | 1.0   | 457   | 471 | 0  | 56.7  | 37 | S | LLRDYGLDDFYLELS          | T | 0.0   | 3.5   |              |
| 54  | Cg1880    | 1 | 1915.8774 | -3.5  | 535   | 549 | 0  | 43.5  | 34 | V | QLDFNMPERFNLEYT          | S | -0.9  | 3.82  |              |
| 55  | Cg0647    | 1 | 1196.5826 | 1.9   | 150   | 159 | 0  | 39.6  | 35 | L | SADRNFDDLI               | V | 0.0   | 3.88  |              |
| 55  | Cg0647    | 1 | 1309.6666 | 0.8   | 149   | 159 | 0  | 43.5  | 35 | V | LSADRNFDDLI              | V | 0.3   | 3.88  |              |
| 55  | Cg0647    | 1 | 1314.6469 | 2.1   | 299   | 308 | 0  | 48.7  | 36 | S | DNWWQRNIIA               | H | -1.0  | 6.78  |              |
| 55  | Cg0647    | 1 | 1330.6418 | 6.8   | 298   | 307 | 0  | 49.5  | 36 | V | SDNWWQRNII               | A | -1.2  | 6.78  |              |
| 55  | Cg0647    | 1 | 1401.6789 | 0.0   | 298   | 308 | 0  | 65.0  | 36 | V | SDNWWQRNIIA              | H | -0.9  | 6.78  |              |
| 55  | Cg0647    | 1 | 1762.9188 | -2.9  | 345   | 360 | 0  | 116.8 | 37 | A | ENMKKYGGFIPGIRPG         | R | -0.7  | 10.18 |              |
| 56  | Cg2291    | 1 | 1461.7939 | -8.1  | 171   | 182 | 0  | 36.5  | 36 | A | LSEKDIRDLRFA             | L | -0.6  | 7.06  |              |
| 56  | Cg2291    | 1 | 1475.7369 | 0.9   | 333   | 345 | 0  | 43.4  | 37 | V | RFAETDGRVDPDLT           | H | -0.8  | 4.3   |              |

| hit | accession | z | mass      | ppm   | start | end | mc | score | id | - | sequence                  | + | gravy | pl    | modification |
|-----|-----------|---|-----------|-------|-------|-----|----|-------|----|---|---------------------------|---|-------|-------|--------------|
| 56  | Cg2291    | 1 | 1620.8723 | 1.3   | 244   | 258 | 0  | 117.4 | 35 | A | RGDLGVEVPLEEVPL           | V | 0.1   | 3.68  |              |
| 56  | Cg2291    | 1 | 2108.9089 | -8.1  | 37    | 53  | 0  | 66.0  | 29 | L | NFSHGDPDHEQNYKWW          | R | -1.9  | 5.74  |              |
| 56  | Cg2291    | 1 | 2557.4592 | -3.6  | 244   | 266 | 0  | 45.3  | 34 | A | RGDLGVEVPLEEVPLVQKRAIQI   | A | 0.0   | 4.64  |              |
| 56  | Cg2291    | 1 | 2628.4963 | -3.0  | 244   | 267 | 0  | 75.4  | 34 | A | RGDLGVEVPLEEVPLVQKRAIQIA  | R | 0.1   | 4.64  |              |
| 57  | Cg2840    | 1 | 896.4504  | 7.3   | 456   | 462 | 0  | 35.8  | 34 | A | HPDYRPL                   | L | -1.7  | 7.76  |              |
| 57  | Cg2840    | 1 | 975.4814  | 5.4   | 488   | 495 | 0  | 52.4  | 36 | A | FDHINLA                   | K | 0.7   | 4.94  |              |
| 57  | Cg2840    | 1 | 979.6178  | 1.1   | 336   | 343 | 0  | 45.4  | 24 | S | IILRPQI                   | S | 0.5   | 11.04 |              |
| 57  | Cg2840    | 1 | 1147.5662 | 2.5   | 486   | 495 | 0  | 71.5  | 36 | A | TAFDFHINLA                | K | 0.7   | 4.94  |              |
| 57  | Cg2840    | 1 | 1351.7684 | -0.7  | 438   | 449 | 0  | 42.0  | 33 | A | DLRGLAPRERVA              | K | -0.6  | 10.8  |              |
| 57  | Cg2840    | 1 | 1664.7834 | -4.1  | 456   | 468 | 0  | 49.8  | 35 | A | HPDYRPLLEEYVA             | R | -1.2  | 4.42  |              |
| 58  | Cg1169    | 1 | 1059.4873 | -2.5  | 507   | 517 | 0  | 36.2  | 34 | T | LVDGPPGSDFG               | V | -0.1  | 2.92  |              |
| 58  | Cg1169    | 1 | 1320.6979 | 4.7   | 37    | 47  | 0  | 44.7  | 35 | V | GLGNIWRFPYV               | A | 0.2   | 9.84  |              |
| 58  | Cg1169    | 1 | 1391.735  | 3.0   | 37    | 48  | 0  | 47.0  | 36 | V | GLGNIWRFPYVA              | Y | 0.4   | 9.84  |              |
| 58  | Cg1169    | 1 | 1817.8948 | -3.7  | 509   | 525 | 0  | 60.2  | 37 | V | DGPPGSDFGVLPFEKRT         | L | -0.8  | 4.3   |              |
| 58  | Cg1169    | 1 | 2030.0473 | -12.4 | 507   | 525 | 0  | 94.9  | 37 | T | LVDGPPGSDFGVLPFEKRT       | L | -0.3  | 4.3   |              |
| 58  | Cg1169    | 1 | 2249.0237 | -2.2  | 534   | 554 | 0  | 66.2  | 34 | A | SNDPISPFANEDASRFPTVA      | I | -0.7  | 3.5   |              |
| 59  | Cg2845    | 1 | 927.4338  | -8.6  | 302   | 310 | 0  | 43.4  | 33 | S | LFDGGTTFA                 | T | 0.6   | 3.1   |              |
| 59  | Cg2845    | 1 | 1120.5706 | 7.6   | 169   | 177 | 0  | 40.3  | 35 | V | YGLWGWQVL                 | G | 0.5   | 5.92  |              |
| 59  | Cg2845    | 1 | 1190.5316 | 1.3   | 317   | 327 | 0  | 58.4  | 34 | A | APEFNDNTRAG               | A | -1.3  | 4.08  |              |
| 59  | Cg2845    | 1 | 1318.6737 | -0.6  | 275   | 287 | 0  | 43.3  | 37 | A | MLGLGRALGETMA             | L | 0.7   | 6.98  |              |
| 59  | Cg2845    | 1 | 1375.6116 | 3.1   | 315   | 327 | 0  | 43.8  | 34 | A | NAAPEFNDNTRAG             | A | -1.3  | 4.08  |              |
| 60  | Cg2949    | 1 | 1885.9017 | 0.4   | 166   | 184 | 0  | 69.3  | 36 | V | SAPVLESGVENREVGDDTA       | E | -0.4  | 3.68  |              |
| 60  | Cg2949    | 1 | 2085.9814 | 1.0   | 166   | 186 | 0  | 67.1  | 36 | V | SAPVLESGVENREVGDDTAEA     | S | -0.4  | 3.58  |              |
| 60  | Cg2949    | 1 | 2272.0819 | 0.2   | 162   | 184 | 0  | 100.5 | 36 | I | DATVSAPVLESGVENREVGDDTA   | E | -0.2  | 3.5   |              |
| 60  | Cg2949    | 1 | 2383.0915 | -0.5  | 84    | 105 | 0  | 78.6  | 35 | T | SHTLESVTVDGEEVELDDAEPI    | E | -0.4  | 3.28  |              |
| 60  | Cg2949    | 1 | 2472.1616 | 1.1   | 162   | 186 | 0  | 105.9 | 36 | I | DATVSAPVLESGVENREVGDDTAEA | S | -0.3  | 3.44  |              |
| 61  | Cg1586    | 1 | 1623.8104 | -2.8  | 283   | 296 | 0  | 40.9  | 36 | A | HEALEDVTIERELA            | R | -0.4  | 4     |              |
| 61  | Cg1586    | 1 | 1633.7988 | -2.1  | 188   | 201 | 0  | 66.1  | 37 | T | GYLEDLWNAPTKDI            | Y | -0.6  | 3.7   |              |
| 61  | Cg1586    | 1 | 1910.0333 | -1.0  | 235   | 252 | 0  | 88.6  | 36 | V | SVLQAIEELNRRAGAQQV        | G | -0.1  | 7.12  |              |
| 61  | Cg1586    | 1 | 1946.985  | -1.4  | 171   | 187 | 0  | 41.4  | 37 | V | KSPFSIDQNVWGRIET          | G | -0.6  | 7.02  |              |
| 61  | Cg1586    | 1 | 2544.1696 | 6.8   | 188   | 209 | 0  | 65.7  | 36 | T | GYLEDLWNAPTKDIYAYTEDPA    | L | -0.8  | 3.42  |              |
| 62  | Cg3365    | 1 | 1016.6383 | 8.9   | 288   | 296 | 0  | 33.3  | 25 | A | VILFGVRTI                 | L | 2.0   | 11.04 |              |
| 62  | Cg3365    | 1 | 1423.8228 | -2.9  | 361   | 373 | 0  | 59.8  | 32 | V | ALILPGLVPHFFT             | G | 1.5   | 7.84  |              |
| 62  | Cg3365    | 1 | 1446.7871 | 2.5   | 497   | 511 | 0  | 76.0  | 35 | T | YPKIAPPAGAPTPPA           | R | -0.3  | 9.72  |              |
| 62  | Cg3365    | 1 | 1696.0287 | -0.9  | 288   | 303 | 0  | 33.0  | 29 | A | VILFGVRTILGELVPA          | F | 1.7   | 6.98  |              |
| 62  | Cg3365    | 1 | 1836.0298 | -6.4  | 361   | 379 | 0  | 56.3  | 34 | V | ALILPGLVPHFFTGGGAAGV      | Y | 1.4   | 7.84  |              |
| 62  | Cg3365    | 1 | 1903.0316 | -3.0  | 492   | 511 | 0  | 39.6  | 36 | T | AGARTYPKIAPPAGAPTPPA      | R | -0.3  | 10.4  |              |
| 63  | Cg2120    | 1 | 984.5393  | 4.8   | 599   | 607 | 0  | 51.8  | 35 | A | ADPFRVIPA                 | M | 0.4   | 6.78  |              |
| 63  | Cg2120    | 1 | 1147.5008 | -2.4  | 331   | 341 | 0  | 72.4  | 32 | A | LGFAFGGYDMA               | N | 0.8   | 3.1   |              |
| 63  | Cg2120    | 1 | 1551.7417 | 6.1   | 11    | 24  | 0  | 64.5  | 36 | V | RLDVDFGDSTTDVI            | N | -0.1  | 3.42  |              |

| hit | accession | z | mass      | ppm  | start | end  | mc | score | id | - | sequence                      | + | gravy | pl    | modification |
|-----|-----------|---|-----------|------|-------|------|----|-------|----|---|-------------------------------|---|-------|-------|--------------|
| 64  | Cg1579    | 1 | 1402.7092 | -8.1 | 99    | 112  | 0  | 97.5  | 37 | V | QEAPAPVEQAPAPV                | Q | -0.3  | 3.12  |              |
| 64  | Cg1579    | 1 | 1463.6794 | -2.5 | 118   | 134  | 0  | 113.9 | 35 | A | ADAPPALPGGGGGHAGY             | - | -0.2  | 4.94  |              |
| 64  | Cg1579    | 1 | 1959.9075 | -2.0 | 113   | 134  | 0  | 119.9 | 35 | V | QEAPAADAPPALPGGGGGHAGY        | - | -0.4  | 4.06  |              |
| 64  | Cg1579    | 1 | 2254.1481 | 10.6 | 77    | 98   | 0  | 91.8  | 37 | V | EAPVEQAPVVEQAPVEQAPAPV        | Q | -0.1  | 2.96  |              |
| 65  | Cg1556    | 1 | 1164.6767 | -1.7 | 40    | 48   | 0  | 39.5  | 30 | I | RYVLPKRYA                     | K | -0.8  | 10.56 |              |
| 65  | Cg1556    | 1 | 1443.747  | 1.1  | 132   | 144  | 0  | 45.5  | 37 | V | DTEGKPGVKWRAT                 | N | -1.4  | 9.88  |              |
| 65  | Cg1556    | 1 | 1629.8475 | -3.8 | 130   | 144  | 0  | 81.4  | 37 | T | SVDTEGKPGVKWRAT               | N | -1.0  | 9.88  |              |
| 65  | Cg1556    | 1 | 1776.7479 | 1.6  | 172   | 186  | 0  | 74.8  | 30 | A | SDWFNDTSDKVTIYA               | Y | -1.2  | 3.5   |              |
| 65  | Cg1556    | 1 | 2014.9272 | 1.0  | 187   | 203  | 0  | 106.8 | 35 | A | YTAQDFVGENKDDWIKS             | A | -1.2  | 3.96  |              |
| 66  | Cg2137    | 1 | 1424.6895 | 2.9  | 114   | 127  | 0  | 36.7  | 35 | I | AATYSINAGRSESV                | N | -0.2  | 6.88  |              |
| 66  | Cg2137    | 1 | 1489.6838 | -3.6 | 213   | 224  | 0  | 55.4  | 34 | G | YSQQYEGDFRVV                  | E | -0.9  | 4.08  |              |
| 66  | Cg2137    | 1 | 1641.8879 | -0.2 | 128   | 142  | 0  | 36.7  | 36 | V | NFGGPLYLLTHQALLV              | R | 0.6   | 7.76  |              |
| 66  | Cg2137    | 1 | 1921.7928 | 3.1  | 225   | 240  | 0  | 90.8  | 28 | V | EMEKDGEPFTDEYYGI              | G | -1.3  | 3.44  |              |
| 67  | Cg2410    | 1 | 1464.7435 | -0.4 | 481   | 492  | 0  | 40.7  | 36 | L | DLFTWMRGDILV                  | K | 0.6   | 3.88  |              |
| 67  | Cg2410    | 1 | 2013.9697 | -0.7 | 561   | 577  | 0  | 63.4  | 36 | M | RHWLAGDELFGWAQDTI             | K | -0.4  | 4.3   |              |
| 67  | Cg2410    | 1 | 2032.1357 | -6.7 | 501   | 517  | 0  | 36.1  | 35 | A | NSLELRVPFLDKVEFKV             | A | 0.1   | 7.1   |              |
| 67  | Cg2410    | 1 | 2348.2562 | -7.0 | 498   | 517  | 0  | 41.4  | 37 | I | NMANLELRVPFLDKVEFKV           | A | 0.1   | 7.1   |              |
| 68  | Cg2195    | 1 | 1643.6812 | -0.5 | 65    | 78   | 0  | 81.5  | 29 | I | FGEEHERDNENTPA                | W | -2.2  | 4     |              |
| 68  | Cg2195    | 1 | 2000.8348 | -3.0 | 62    | 78   | 0  | 75.0  | 28 | G | EDIFGEEHERDNENTPA             | W | -1.9  | 3.74  |              |
| 68  | Cg2195    | 1 | 2158.9039 | 1.0  | 60    | 78   | 0  | 107.4 | 29 | V | TGEDIFGEEHERDNENTPA           | W | -1.8  | 3.74  |              |
| 68  | Cg2195    | 1 | 3271.345  | 4.4  | 50    | 78   | 0  | 152.6 | 26 | V | GEDWDADQPVTGEDIFGEEHERDNENTPA | W | -1.7  | 3.42  |              |
| 69  | Cg0577    | 1 | 1827.0506 | -1.1 | 113   | 128  | 0  | 64.9  | 33 | S | RLGYLLDLAPKDLDLI              | I | 0.4   | 4.18  |              |
| 69  | Cg0577    | 1 | 2383.1921 | -6.1 | 1030  | 1052 | 0  | 42.0  | 38 | T | FHQGGVGGDITGGLPRVQELFEA       | R | -0.1  | 4.42  |              |
| 70  | Cg0935    | 1 | 1104.5716 | 0.4  | 63    | 71   | 0  | 52.4  | 36 | T | GYVHPYTRI                     | N | -0.5  | 9.58  |              |
| 70  | Cg0935    | 1 | 1362.6092 | -2.6 | 46    | 57   | 0  | 71.0  | 33 | A | SSPWGDDKEFPV                  | S | -1.1  | 3.7   |              |
| 70  | Cg0935    | 1 | 1561.7049 | -6.7 | 43    | 57   | 0  | 76.7  | 33 | V | AGASSPWGDDKEFPV               | S | -0.7  | 3.7   |              |
| 70  | Cg0935    | 1 | 1879.8112 | 0.6  | 46    | 62   | 0  | 105.7 | 31 | A | SSPWGDDKEFPVSAEET             | G | -1.2  | 3.5   |              |
| 70  | Cg0935    | 1 | 2078.9069 | 2.2  | 43    | 62   | 0  | 77.3  | 32 | V | AGASSPWGDDKEFPVSAEET          | G | -0.9  | 3.5   |              |
| 71  | Cg1280    | 1 | 1966.9577 | 1.5  | 1203  | 1218 | 0  | 80.0  | 37 | A | NQGPWPFYQEHLPELI              | P | -0.8  | 4.24  |              |
| 71  | Cg1280    | 1 | 1972.8877 | 7.0  | 369   | 384  | 0  | 39.0  | 34 | S | RLLTDDSFWDIEFDAM              | N | -0.2  | 3.36  |              |
| 72  | Cg0703    | 1 | 1660.8824 | -4.6 | 482   | 494  | 0  | 81.2  | 36 | A | DWTRLPYEVLEKI                 | S | -0.5  | 4.44  |              |
| 72  | Cg0703    | 1 | 2302.2685 | -4.0 | 366   | 384  | 0  | 50.8  | 36 | V | EFKLVLEPLRDLFKDEVRAV          | G | -0.2  | 4.72  |              |
| 72  | Cg0703    | 1 | 2387.2961 | -2.8 | 385   | 407  | 0  | 65.8  | 36 | V | GRELGLPEEIVGRQPFPGPLGI        | R | -0.2  | 4.56  |              |
| 73  | Cg2558    | 1 | 1392.631  | -1.5 | 210   | 221  | 0  | 37.5  | 34 | V | ADIGEGWRDFV                   | C | -0.6  | 3.58  |              |
| 73  | Cg2558    | 1 | 1425.7656 | 5.3  | 51    | 64   | 0  | 79.4  | 35 | I | IAPWFGLLGLDPA                 | H | 1.0   | 3.1   |              |
| 73  | Cg2558    | 1 | 1594.7264 | -6.5 | 157   | 170  | 0  | 47.3  | 34 | T | QDGPVTFDGEFDRI                | A | -0.8  | 3.5   |              |
| 73  | Cg2558    | 1 | 1635.8297 | -3.8 | 124   | 136  | 0  | 68.5  | 37 | A | FHPYFKVDDVEKI                 | E | -0.5  | 5.28  |              |
| 73  | Cg2558    | 1 | 1831.8701 | -4.3 | 148   | 163  | 0  | 58.0  | 36 | L | NRLNNEVETQDGPVTF              | D | -1.1  | 3.82  |              |
| 73  | Cg2558    | 1 | 2722.2987 | 0.8  | 72    | 95   | 0  | 60.3  | 37 | S | AWDVTEHDGQIHAHYGRDGLLLDI      | R | -0.5  | 3.98  |              |
| 74  | Cg2799    | 1 | 968.4868  | -5.2 | 147   | 153  | 0  | 37.0  | 34 | T | LYWNFRA                       | F | -0.3  | 9.84  |              |

| hit | accession | z | mass      | ppm   | start | end | mc | score | id | - | sequence                    | + | gravy | pl    | modification |
|-----|-----------|---|-----------|-------|-------|-----|----|-------|----|---|-----------------------------|---|-------|-------|--------------|
| 74  | Cg2799    | 1 | 1069.5345 | 0.4   | 146   | 153 | 0  | 40.7  | 35 | A | TLYWNFRA                    | F | -0.3  | 9.84  |              |
| 74  | Cg2799    | 1 | 1571.7005 | -6.0  | 141   | 153 | 0  | 55.2  | 32 | A | DSNDATLYWNFRA               | F | -0.9  | 3.88  |              |
| 74  | Cg2799    | 1 | 1741.806  | -1.1  | 139   | 153 | 0  | 71.2  | 35 | A | VADSNATLYWNFRA              | F | -0.4  | 3.88  |              |
| 75  | Cg2704    | 1 | 782.4075  | 17.4  | 100   | 105 | 0  | 37.5  | 32 | T | NFFRTV                      | F | 0.2   | 11.04 |              |
| 75  | Cg2704    | 1 | 1211.6233 | 4.5   | 184   | 192 | 0  | 42.3  | 35 | V | NKWEMLRHV                   | T | -1.1  | 10.08 |              |
| 75  | Cg2704    | 1 | 1295.651  | -2.4  | 211   | 221 | 0  | 76.8  | 35 | S | NSFKLFDQNLA                 | L | -0.3  | 6.76  |              |
| 75  | Cg2704    | 1 | 1392.682  | 1.1   | 240   | 251 | 0  | 46.5  | 36 | I | NTLFNRMNVEGV                | G | -0.2  | 6.98  |              |
| 76  | Cg1363    | 1 | 1231.5689 | 2.4   | 42    | 52  | 0  | 62.4  | 35 | A | LEGMARQPEMA                 | G | -0.5  | 4.26  |              |
| 76  | Cg1363    | 1 | 1364.8391 | -5.3  | 27    | 41  | 0  | 41.1  | 28 | A | TIGPGLGIGILVGKA             | L | 1.3   | 10.1  |              |
| 76  | Cg1363    | 1 | 1869.9804 | 1.2   | 35    | 52  | 0  | 65.6  | 37 | I | GILVGKALEGMARQPEMA          | G | 0.2   | 7.1   |              |
| 76  | Cg1363    | 1 | 2578.3975 | -7.3  | 27    | 52  | 0  | 124.2 | 37 | A | TIGPGLGIGILVGKALEGMARQPEMA  | G | 0.5   | 7.1   |              |
| 76  | Cg1363    | 1 | 2649.4346 | -11.3 | 26    | 52  | 0  | 97.0  | 37 | I | ATIGPGLGIGILVGKALEGMARQPEMA | G | 0.6   | 7.1   |              |
| 77  | Cg2900    | 1 | 1942.0047 | -5.4  | 304   | 320 | 0  | 106.9 | 37 | A | PYLLSPENLDDLIARDV           | - | -0.1  | 3.5   |              |
| 77  | Cg2900    | 1 | 2453.3053 | -3.9  | 299   | 320 | 0  | 48.6  | 37 | T | VLEVAPYLLSPENLDDLIARDV      | - | 0.4   | 3.42  |              |
| 77  | Cg2900    | 1 | 2701.4214 | 4.9   | 297   | 320 | 0  | 50.8  | 37 | A | FTVLEVAPYLLSPENLDDLIARDV    | - | 0.5   | 3.42  |              |
| 78  | Cg2192    | 1 | 1368.6867 | 1.2   | 321   | 332 | 0  | 37.2  | 36 | L | FGPYGGWTPKFL                | K | -0.2  | 9.72  |              |
| 78  | Cg2192    | 1 | 1594.8548 | -2.6  | 319   | 332 | 0  | 102.3 | 36 | G | LLFGPYGGWTPKFL              | K | 0.4   | 9.72  |              |
| 78  | Cg2192    | 1 | 1863.973  | -1.9  | 336   | 351 | 0  | 66.6  | 37 | G | SYLDFKSIRPDNIPS             | Y | -0.4  | 6.82  |              |
| 78  | Cg2192    | 1 | 2095.0779 | -2.3  | 314   | 332 | 0  | 39.5  | 37 | I | EGEKLLFGPYGGWTPKFL          | K | -0.3  | 7     |              |
| 79  | Cg2695    | 1 | 1298.7055 | -3.3  | 443   | 454 | 0  | 47.2  | 36 | V | LSGGERNRLNLA                | L | -0.7  | 10.88 |              |
| 79  | Cg2695    | 1 | 1610.8304 | -5.8  | 305   | 318 | 0  | 63.5  | 36 | L | DFEEIQIPTPPRLG              | N | -0.6  | 3.82  |              |
| 79  | Cg2695    | 1 | 1841.0775 | -4.0  | 336   | 352 | 0  | 61.8  | 32 | V | LIKDLSFTLPRNGIVGV           | I | 0.7   | 10.08 |              |
| 79  | Cg2695    | 1 | 1902.9799 | -0.6  | 86    | 101 | 0  | 65.8  | 37 | V | RQNVEEGLGEIFEKKQ            | R | -1.4  | 4.72  |              |
| 80  | Cg3149    | 1 | 1292.5476 | 3.9   | 401   | 410 | 0  | 49.3  | 32 | T | GFNWP HHDF                  | R | -1.4  | 6.3   |              |
| 80  | Cg3149    | 1 | 1680.8763 | -25.5 | 365   | 378 | 0  | 47.8  | 36 | A | LYAFP KLDPNVYEI             | H | 0.1   | 4.08  |              |
| 80  | Cg3149    | 1 | 1889.8949 | -1.9  | 116   | 131 | 0  | 43.1  | 36 | T | RYEVVPGFPHFDVDDV            | F | -0.3  | 3.96  |              |
| 80  | Cg3149    | 1 | 2477.2016 | -2.5  | 116   | 137 | 0  | 61.3  | 37 | T | RYEVVPGFPHFDVDDVFLGNGV      | S | 0.1   | 3.96  |              |
| 81  | Cg0834    | 1 | 1110.571  | 2.3   | 326   | 334 | 0  | 35.4  | 35 | A | TARDFIEFI                   | I | 0.5   | 4.08  |              |
| 81  | Cg0834    | 1 | 1850.8758 | 1.1   | 308   | 325 | 0  | 109.1 | 36 | V | STLGGYNNGINVNSENKA          | T | -0.9  | 6.86  |              |
| 81  | Cg0834    | 1 | 1881.9948 | -4.9  | 159   | 175 | 0  | 80.3  | 37 | T | NGQLLFRNTEIIP EAPA          | N | -0.2  | 4.26  |              |
| 81  | Cg0834    | 1 | 1938.9323 | -6.4  | 326   | 341 | 0  | 50.4  | 36 | A | TARDFIEFIINEENQT            | W | -0.6  | 3.68  |              |
| 82  | Cg1451    | 1 | 1406.7405 | 1.1   | 373   | 385 | 0  | 66.0  | 36 | V | RGLFSGIIEESVT               | F | 0.4   | 4.26  |              |
| 82  | Cg1451    | 1 | 1639.9118 | -13.4 | 443   | 457 | 0  | 42.3  | 36 | I | TRINGRGLDLRAEGL             | N | -0.5  | 10.8  |              |
| 83  | Cg2963    | 1 | 1075.5815 | -12.6 | 612   | 621 | 0  | 41.5  | 36 | S | RLFGAPPYV                   | G | 0.3   | 9.84  |              |
| 83  | Cg2963    | 1 | 1361.7303 | -9.2  | 187   | 198 | 0  | 41.1  | 36 | T | SLVLDQFGRNLT                | Q | 0.1   | 6.78  |              |
| 83  | Cg2963    | 1 | 1669.8271 | -4.8  | 60    | 74  | 0  | 36.5  | 36 | V | RQEVEEIIQGGSQPT             | T | -1.1  | 3.96  |              |
| 83  | Cg2963    | 1 | 2626.3966 | -4.9  | 365   | 387 | 0  | 67.7  | 38 | V | QVPEPSVDLTVEILKGLRDRYEA     | H | -0.4  | 4.28  |              |
| 84  | Cg0414    | 1 | 1405.7201 | -3.3  | 131   | 143 | 0  | 56.0  | 37 | A | NAVGESFKNVIQT               | E | -0.2  | 6.94  |              |
| 84  | Cg0414    | 1 | 1632.9086 | -9.1  | 221   | 235 | 0  | 53.4  | 35 | G | GIIADSEVEKHPLII             | K | 0.5   | 4.42  |              |
| 84  | Cg0414    | 1 | 1684.7369 | 10.3  | 441   | 456 | 0  | 72.3  | 33 | V | AGYGYGNVGYGDTSKI            | N | -0.8  | 6.54  |              |

| hit | accession | z | mass      | ppm   | start | end | mc | score | id | - | sequence                  | + | gravy | pl    | modification  |
|-----|-----------|---|-----------|-------|-------|-----|----|-------|----|---|---------------------------|---|-------|-------|---------------|
| 85  | Cg1203    | 1 | 1464.8313 | -8.1  | 164   | 176 | 0  | 34.6  | 34 | I | HYGLIPRANRGIV             | A | 0.0   | 11.14 |               |
| 85  | Cg1203    | 1 | 1708.758  | -7.8  | 342   | 355 | 0  | 44.5  | 32 | I | EFESGEEGREWEIL            | D | -1.2  | 3.58  |               |
| 85  | Cg1203    | 1 | 2063.98   | -0.8  | 338   | 355 | 0  | 37.3  | 36 | L | GGKIEFESGEEGREWEIL        | D | -1.0  | 3.96  |               |
| 85  | Cg1203    | 1 | 2896.4243 | 0.6   | 338   | 362 | 0  | 62.8  | 38 | L | GGKIEFESGEEGREWEILDYLLRTA | T | -0.7  | 4.08  |               |
| 86  | Cg1813    | 1 | 1501.7412 | -5.3  | 486   | 498 | 0  | 75.9  | 36 | V | DAPFLNEDLLREA             | K | -0.4  | 3.58  |               |
| 86  | Cg1813    | 1 | 1699.7995 | 1.4   | 413   | 426 | 0  | 37.2  | 35 | G | FWTKPDEFFAGERA            | T | -0.8  | 4.44  |               |
| 86  | Cg1813    | 1 | 1756.8209 | -11.7 | 412   | 426 | 0  | 39.8  | 34 | Q | FWTKPDEFFAGERA            | T | -0.7  | 4.44  |               |
| 88  | Cg1603    | 1 | 2013.0643 | -5.2  | 245   | 264 | 0  | 38.9  | 37 | S | GANVILPADPDGHAVGLERI      | Q | 0.2   | 4.3   |               |
| 88  | Cg1603    | 1 | 2286.0764 | -1.3  | 298   | 319 | 0  | 59.5  | 36 | I | VNVGGPVTLDGVFENRESDPA     | A | -0.4  | 3.42  |               |
| 89  | Cg2157    | 1 | 1336.7391 | -0.3  | 249   | 259 | 0  | 44.4  | 34 | M | YFLLDGLLDRL               | V | 0.8   | 3.88  |               |
| 89  | Cg2157    | 1 | 1665.8111 | -0.1  | 282   | 296 | 0  | 117.4 | 36 | A | LHENLPPFINGGENV           | S | -0.5  | 4.24  |               |
| 89  | Cg2157    | 1 | 1685.7533 | 1.4   | 153   | 166 | 0  | 55.7  | 33 | L | LWDEVDRTPETDPN            | D | -1.6  | 3.42  |               |
| 89  | Cg2157    | 1 | 2305.0573 | -3.9  | 153   | 171 | 0  | 53.8  | 34 | L | LWDEVDRTPETDPNDMFII       | K | -0.7  | 3.32  |               |
| 90  | Cg2984    | 1 | 2155.977  | 3.3   | 731   | 751 | 0  | 74.7  | 35 | A | QAPEQSPDSSGGRPNPYATPT     | A | -1.5  | 4.08  |               |
| 91  | Cg0896    | 1 | 1018.5733 | 7.8   | 295   | 304 | 0  | 37.1  | 33 | L | MLLSSVIIGA                | A | 2.3   | 6.02  | Oxidation (M) |
| 91  | Cg0896    | 1 | 1312.6452 | 4.3   | 231   | 240 | 0  | 36.8  | 36 | A | GYWLDRYDLL                | T | -0.4  | 3.88  |               |
| 91  | Cg0896    | 1 | 1415.7561 | 2.8   | 703   | 713 | 0  | 52.5  | 36 | A | HLRYPEDLFKV               | Q | -0.6  | 7.74  |               |
| 92  | Cg1362    | 1 | 1354.7285 | 6.3   | 232   | 242 | 0  | 64.4  | 35 | I | EFFSTFILRPV               | T | 0.9   | 6.98  |               |
| 92  | Cg1362    | 1 | 1647.7569 | 2.2   | 56    | 69  | 0  | 93.6  | 35 | G | EFHAPDLDKEFFPG            | H | -0.8  | 4.06  |               |
| 92  | Cg1362    | 1 | 1963.9138 | -1.4  | 53    | 69  | 0  | 63.8  | 35 | S | MKGEFHAPDLDKEFFPG         | H | -0.8  | 4.54  |               |
| 92  | Cg1362    | 1 | 2887.3487 | 4.8   | 53    | 78  | 0  | 53.6  | 36 | S | MKGEFHAPDLDKEFFPGHVTDSEVV | N | -0.5  | 4.36  |               |
| 94  | Cg3008    | 1 | 802.3902  | -3.4  | 22    | 27  | 0  | 43.6  | 36 | G | YVFDFL                    | G | 1.5   | 3.1   |               |
| 94  | Cg3008    | 1 | 859.4116  | -5.4  | 21    | 27  | 0  | 51.5  | 35 | I | GYVFDFL                   | G | 1.2   | 3.1   |               |
| 94  | Cg3008    | 1 | 1142.6012 | 20.6  | 18    | 27  | 0  | 50.9  | 36 | S | GLIGYVFDFL                | G | 1.6   | 3.1   |               |
| 94  | Cg3008    | 1 | 1373.6867 | 3.7   | 15    | 27  | 0  | 93.9  | 37 | L | SGSGLIGYVFDFL             | G | 1.1   | 3.1   |               |
| 94  | Cg3008    | 1 | 1501.7453 | 14.7  | 15    | 29  | 0  | 75.1  | 37 | L | SGSGLIGYVFDFLGA           | S | 1.0   | 3.1   |               |
| 95  | Cg1525    | 1 | 1941.9758 | -5.0  | 244   | 260 | 0  | 49.1  | 37 | V | KDLELPLGPDDFEMKPV         | Q | -0.6  | 3.84  |               |
| 95  | Cg1525    | 1 | 2127.1827 | 0.2   | 77    | 95  | 0  | 55.8  | 35 | A | TPPEFKGQVEILKEVLSTL       | G | 0.0   | 4.56  |               |
| 95  | Cg1525    | 1 | 2360.1913 | -2.9  | 742   | 760 | 0  | 55.6  | 38 | S | YFERFGGVQRYLREIVEEA       | R | -0.5  | 4.72  |               |
| 96  | Cg0610    | 1 | 1241.7357 | 0.4   | 113   | 122 | 0  | 33.7  | 32 | A | LPRIRDFRGL                | S | -0.4  | 12.1  |               |
| 96  | Cg0610    | 1 | 1338.6456 | -4.6  | 20    | 30  | 0  | 38.5  | 35 | T | KLQGEFEFENV               | M | -0.7  | 3.96  |               |
| 96  | Cg0610    | 1 | 1387.7646 | -11.2 | 79    | 90  | 0  | 46.8  | 36 | S | IANFKLREGMPI              | G | 0.2   | 10.08 |               |
| 98  | Cg2466    | 1 | 946.4297  | -2.3  | 160   | 168 | 0  | 35.5  | 34 | I | FFQGHASPG                 | M | -0.3  | 7.84  |               |
| 98  | Cg2466    | 1 | 1325.6405 | 3.5   | 552   | 562 | 0  | 49.1  | 35 | A | RTFGLDSWFPT               | L | -0.3  | 6.78  |               |
| 98  | Cg2466    | 1 | 1871.0516 | -5.2  | 437   | 452 | 0  | 43.6  | 35 | L | TLDDLKLFDRDKQGIPI         | T | -0.4  | 6.96  |               |
| 98  | Cg2466    | 1 | 2090.9579 | -6.1  | 251   | 269 | 0  | 42.3  | 34 | A | FLGDGEMDEPESRGLIQA        | A | -0.7  | 3.5   |               |
| 99  | Cg1121    | 1 | 1853.8081 | -4.3  | 29    | 45  | 0  | 31.6  | 31 | T | QRPQQNPYGGYDNFQGG         | V | -1.8  | 6.64  |               |
| 99  | Cg1121    | 1 | 1952.8766 | -0.1  | 29    | 46  | 0  | 58.6  | 34 | T | QRPQQNPYGGYDNFQGGV        | Y | -1.5  | 6.64  |               |
| 99  | Cg1121    | 1 | 2372.057  | -1.2  | 29    | 49  | 0  | 74.5  | 33 | T | QRPQQNPYGGYDNFQGGVYQQ     | N | -1.6  | 6.58  |               |
| 99  | Cg1121    | 1 | 2486.1    | -5.5  | 29    | 50  | 0  | 51.3  | 32 | T | QRPQQNPYGGYDNFQGGVYQQN    | V | -1.7  | 6.58  |               |

| hit | accession | z | mass      | ppm   | start | end | mc | score | id | - | sequence                   | + | gravy | pl    | modification |
|-----|-----------|---|-----------|-------|-------|-----|----|-------|----|---|----------------------------|---|-------|-------|--------------|
| 99  | Cg1121    | 1 | 2881.3168 | 4.0   | 29    | 54  | 0  | 52.0  | 35 | T | QRPQQQNPYGGYDNFGGVYQQNVAPQ | K | -1.4  | 6.58  |              |
| 100 | Cg0238    | 1 | 1865.0564 | -4.1  | 125   | 141 | 0  | 69.2  | 34 | A | ALPYGLWVPVLPGRQV           | T | 0.5   | 9.84  |              |
| 100 | Cg0238    | 1 | 1904.9666 | -5.7  | 369   | 384 | 0  | 44.8  | 37 | T | EAVEPFKDIIRDMQKS           | G | -0.8  | 4.56  |              |
| 100 | Cg0238    | 1 | 2257.1565 | -4.5  | 426   | 444 | 0  | 41.7  | 38 | A | FLDDLKRVMEFGGRLYLA         | K | 0.0   | 4.46  |              |
| 102 | Cg2166    | 1 | 1752.9887 | -3.3  | 673   | 688 | 0  | 41.0  | 34 | A | NPQLPKVGERFLGTVV           | K | 0.0   | 10.08 |              |
| 102 | Cg2166    | 1 | 1812.824  | -1.5  | 537   | 553 | 0  | 38.0  | 34 | T | DILGAEDAFGDMDFKVA          | G | 0.2   | 3.36  |              |
| 102 | Cg2166    | 1 | 2122.1899 | -5.3  | 669   | 688 | 0  | 47.5  | 35 | I | NALANPQLPKVGERFLGTVV       | K | 0.2   | 10.08 |              |
| 103 | Cg1314    | 1 | 1657.6969 | -2.1  | 220   | 235 | 0  | 113.3 | 29 | A | NSNDYGPHTDGIGNPT           | Y | -1.5  | 3.88  |              |
| 104 | Cg3219    | 1 | 1441.7089 | -3.1  | 174   | 186 | 0  | 56.8  | 36 | A | YIIGEHDTELPV               | L | -0.1  | 3.82  |              |
| 104 | Cg3219    | 1 | 1829.9134 | -1.1  | 155   | 169 | 0  | 44.6  | 37 | A | RFRYMLGELYEVAPS            | S | -0.2  | 6.98  |              |
| 104 | Cg3219    | 1 | 1875.889  | 2.2   | 260   | 276 | 0  | 97.9  | 36 | A | LLHGEYGEEDIYIGTPA          | V | -0.3  | 3.68  |              |
| 104 | Cg3219    | 1 | 1941.0353 | 0.3   | 199   | 214 | 0  | 57.9  | 37 | S | RMLDKDPELEGRLEKI           | F | -1.2  | 4.72  |              |
| 105 | Cg2496    | 1 | 2103.8897 | 3.5   | 655   | 682 | 0  | 99.6  | 30 | G | GFGGGGGFSGGGGGGFRGG        | R | -0.1  | 11.04 |              |
| 105 | Cg2496    | 1 | 2618.2249 | -7.5  | 121   | 144 | 0  | 64.8  | 35 | A | LAPEERQYGIQGGTQWTDALDAA    | N | -0.8  | 3.5   |              |
| 107 | Cg0656    | 1 | 1793.91   | -6.0  | 78    | 92  | 0  | 93.7  | 37 | A | YLFNELAPKFENRPG            | G | -0.8  | 7.02  |              |
| 108 | Cg1463    | 1 | 1713.7482 | 4.6   | 132   | 145 | 0  | 43.0  | 33 | G | YDNFDRDLTEEQVA             | A | -1.3  | 3.42  |              |
| 108 | Cg1463    | 1 | 2561.3489 | -3.3  | 89    | 110 | 0  | 94.1  | 38 | S | QRKDIYQDVLKQLIDAGEVYPA     | Y | -0.6  | 4.46  |              |
| 109 | Cg0835    | 1 | 1409.6688 | -11.5 | 321   | 332 | 0  | 39.6  | 35 | A | HHFDLESGERIA               | - | -0.8  | 5.18  |              |
| 110 | Cg2492    | 1 | 1616.8443 | -3.6  | 444   | 457 | 0  | 47.8  | 37 | V | SSILDSLREMPKI              | Q | -0.3  | 4.44  |              |
| 110 | Cg2492    | 1 | 1898.9486 | -4.2  | 108   | 124 | 0  | 46.3  | 37 | V | HNGIIEFAELRSELSA           | K | -0.2  | 4.54  |              |
| 113 | Cg3195    | 1 | 1682.794  | 1.8   | 35    | 47  | 0  | 51.3  | 36 | V | QLFEDEGYWRDLL              | A | -0.8  | 3.58  |              |
| 113 | Cg3195    | 1 | 2080.9836 | 1.1   | 221   | 236 | 0  | 47.0  | 36 | V | WYDHLPIYIPDPHWPV           | F | -0.6  | 4.94  |              |
| 113 | Cg3195    | 1 | 2490.2543 | -5.5  | 436   | 457 | 0  | 57.2  | 38 | A | GFLDFGDDDSGLFLKYLRGS       | G | -0.2  | 4.34  |              |
| 114 | Cg0047    | 1 | 1525.8001 | 0.5   | 124   | 135 | 0  | 62.2  | 36 | A | TEKKESHWVRNL               | S | -1.7  | 9.88  |              |
| 114 | Cg0047    | 1 | 2258.0927 | -2.4  | 54    | 73  | 0  | 86.2  | 37 | T | ARESAKEFYTESRDKAGNVT       | K | -1.3  | 7.1   |              |
| 115 | Cg0303    | 1 | 1514.7001 | -6.7  | 545   | 557 | 0  | 62.7  | 34 | L | GIDVEIQEYNQHA              | R | -0.8  | 3.82  |              |
| 115 | Cg0303    | 1 | 1771.8489 | 0.3   | 545   | 559 | 0  | 37.8  | 36 | L | GIDVEIQEYNQHART            | S | -1.1  | 4.42  |              |
| 116 | Cg0654    | 1 | 1478.8609 | -3.5  | 165   | 176 | 0  | 38.1  | 32 | A | WLQVVPENLRIL               | V | 0.6   | 6.98  |              |
| 116 | Cg0654    | 1 | 2409.3645 | -3.5  | 165   | 184 | 0  | 39.1  | 34 | A | WLQVVPENLRILVHQLPERA       | Q | 0.0   | 7.86  |              |
| 117 | Cg2096    | 1 | 1430.5811 | 5.5   | 11    | 24  | 0  | 73.0  | 29 | E | PNNNGGNSNDPFNA             | N | -1.8  | 3.1   |              |
| 117 | Cg2096    | 1 | 1765.8271 | 1.9   | 56    | 72  | 0  | 53.4  | 36 | S | GYTGGFENSPLNAPKNT          | A | -1.0  | 6.86  |              |
| 117 | Cg2096    | 1 | 2313.9774 | 9.6   | 25    | 47  | 0  | 108.6 | 31 | A | NQGEPYGYGESFGPSSGAQQS      | G | -1.2  | 3.12  |              |
| 117 | Cg2096    | 1 | 2633.167  | 8.1   | 48    | 72  | 0  | 39.2  | 34 | S | GYQDPYGSYTGGFENSPLNAPKNT   | A | -1.2  | 4.08  |              |
| 118 | Cg1643    | 1 | 1321.6779 | -5.1  | 456   | 467 | 0  | 39.1  | 36 | A | ALIQQQRDFFGA               | H | 0.1   | 6.78  |              |
| 118 | Cg1643    | 1 | 1701.7231 | 17.0  | 360   | 374 | 0  | 43.6  | 33 | A | GSDENNWDVDPRLA             | T | -1.5  | 3.36  |              |
| 118 | Cg1643    | 1 | 1770.9628 | -9.0  | 413   | 427 | 0  | 37.9  | 37 | S | ELGDLIDSWRRVIVT            | A | 0.2   | 4.3   |              |
| 119 | Cg0235    | 1 | 1702.8467 | 2.0   | 404   | 417 | 0  | 52.8  | 37 | A | FWLPYNNGTRPEPI             | I | -0.9  | 6.88  |              |
| 120 | Cg2703    | 1 | 970.531   | -4.4  | 213   | 220 | 0  | 49.1  | 35 | V | VWPMLKPT                   | A | 0.2   | 10.1  |              |
| 120 | Cg2703    | 1 | 1526.6606 | 0.1   | 259   | 273 | 0  | 48.9  | 32 | S | FVGSNGNRDTGAMMA            | M | -0.2  | 6.78  |              |
| 120 | Cg2703    | 1 | 1539.6736 | 2.2   | 257   | 271 | 0  | 39.8  | 33 | I | QSFVGSNGNRDTGAM            | M | -0.8  | 6.78  |              |

| hit | accession | z | mass      | ppm   | start | end | mc | score | id | - | sequence                    | + | gravy | pl    | modification |
|-----|-----------|---|-----------|-------|-------|-----|----|-------|----|---|-----------------------------|---|-------|-------|--------------|
| 120 | Cg2703    | 1 | 1595.8096 | -0.1  | 285   | 297 | 0  | 53.6  | 36 | I | FYFSTQRHIEGV                | A | 0.1   | 7.76  |              |
| 120 | Cg2703    | 1 | 1741.7512 | 0.5   | 257   | 273 | 0  | 42.9  | 32 | I | QSFVGSNGNRDTGAMMA           | M | -0.4  | 6.78  |              |
| 121 | Cg3100    | 1 | 1774.7758 | 0.7   | 194   | 209 | 0  | 95.7  | 32 | T | SGDNELGGDDWDQRIV            | D | -1.2  | 3.36  |              |
| 121 | Cg3100    | 1 | 2461.3693 | -5.3  | 425   | 448 | 0  | 56.1  | 35 | A | NKLLGSFELGGIAPARGVPIEV      | T | 0.2   | 7.1   |              |
| 122 | Cg2333    | 1 | 2193.0127 | -16.1 | 73    | 91  | 0  | 82.7  | 33 | V | SDDSYLWGDQQWTGRILPG         | S | -1.0  | 3.6   |              |
| 122 | Cg2333    | 1 | 2657.3225 | -4.6  | 101   | 124 | 0  | 65.0  | 38 | G | TFSEDGTFEGVVDKLPYLRDLGVT    | A | -0.1  | 3.84  |              |
| 123 | Cg3154    | 1 | 2220.2154 | -4.9  | 99    | 117 | 0  | 52.3  | 36 | T | YVRQVVEDLVPILLEGEHII        | F | 0.5   | 4.16  |              |
| 123 | Cg3154    | 1 | 3035.6696 | -3.6  | 99    | 125 | 0  | 61.9  | 36 | T | YVRQVVEDLVPILLEGEHIFGKSTVPV | G | 0.5   | 4.62  |              |
| 124 | Cg1238    | 1 | 1112.5655 | 1.6   | 255   | 263 | 0  | 52.5  | 35 | L | GWELPYHLV                   | H | 0.1   | 5.12  |              |
| 124 | Cg1238    | 1 | 1283.7172 | -0.2  | 59    | 68  | 0  | 38.4  | 35 | A | RELPMIWRIA                  | K | 0.2   | 10.88 |              |
| 124 | Cg1238    | 1 | 1641.8039 | -2.9  | 250   | 263 | 0  | 104.6 | 36 | V | GTEELGWELPYHLV              | H | -0.2  | 3.96  |              |
| 125 | Cg0161    | 1 | 1925.9595 | -6.0  | 214   | 230 | 0  | 57.2  | 37 | T | GTDAPPTRPQDFERQIV           | L | -1.2  | 4.3   |              |
| 127 | Cg2406    | 1 | 913.4803  | 2.4   | 18    | 25  | 0  | 46.0  | 35 | A | ALNRPNMV                    | S | -0.2  | 11.04 |              |
| 127 | Cg2406    | 1 | 984.5175  | 3.7   | 17    | 25  | 0  | 44.6  | 35 | V | AALNRPNMV                   | S | 0.0   | 11.04 |              |
| 127 | Cg2406    | 1 | 1394.7711 | 2.8   | 97    | 107 | 0  | 49.6  | 34 | G | DVYGLRKWFLV                 | T | 0.4   | 9.72  |              |
| 134 | Cg1725    | 1 | 1836.8928 | -1.7  | 140   | 155 | 0  | 65.2  | 37 | I | DSILDMRQLFDGIDLS            | S | 0.1   | 3.42  |              |
| 134 | Cg1725    | 1 | 2021.0139 | -3.7  | 138   | 155 | 0  | 44.0  | 37 | V | AIDSILDMRQLFDGIDLS          | S | 0.4   | 3.42  |              |
| 137 | Cg2678    | 1 | 1199.5975 | -12.8 | 54    | 62  | 0  | 52.5  | 35 | T | YLEPQFFRT                   | L | -0.6  | 6.88  |              |
| 137 | Cg2678    | 1 | 1956.9693 | -7.6  | 305   | 320 | 0  | 37.3  | 37 | V | NNSFNFRFKNELLSDI            | R | -0.7  | 7.02  |              |
| 138 | Cg1364    | 1 | 1434.7355 | 0.1   | 171   | 183 | 0  | 77.1  | 36 | S | GTIDRFLADLDTV               | A | 0.3   | 3.6   |              |
| 138 | Cg1364    | 1 | 1901.9847 | -5.3  | 171   | 188 | 0  | 79.0  | 37 | S | GTIDRFLADLDTVAPNGK          | - | -0.2  | 4.18  |              |
| 143 | Cg2586    | 1 | 1583.8784 | -10.0 | 419   | 432 | 0  | 60.8  | 36 | T | STKWILQGTGQIRP              | - | -0.6  | 11.48 |              |
| 144 | Cg2292    | 1 | 2279.1393 | -2.1  | 294   | 316 | 0  | 101.7 | 37 | V | ASPDGKPLPKAGEGIDGETPSTR     | - | -1.1  | 4.56  |              |
| 148 | Cg3182    | 1 | 1544.7623 | 4.8   | 132   | 144 | 0  | 38.4  | 37 | Y | SSPNREFPEIWA                | D | -0.6  | 4.26  |              |
| 149 | Cg2811    | 1 | 1527.7205 | 1.1   | 200   | 213 | 0  | 38.6  | 35 | A | GYLERYTDGATVPS              | V | -0.6  | 4.08  |              |
| 150 | Cg0658    | 1 | 1396.8078 | -0.6  | 110   | 121 | 0  | 38.2  | 33 | G | AWLIIDRAVDLL                | L | 1.3   | 3.88  |              |
| 151 | Cg0472    | 1 | 1701.9301 | -4.1  | 137   | 151 | 0  | 78.8  | 36 | T | SQGFAEQLIQELIKV             | T | 0.2   | 4.26  |              |
| 151 | Cg0472    | 1 | 1802.9778 | -3.4  | 137   | 152 | 0  | 67.9  | 36 | T | SQGFAEQLIQELIKVT            | D | 0.1   | 4.26  |              |
| 151 | Cg0472    | 1 | 2219.1434 | -3.6  | 132   | 152 | 0  | 43.2  | 37 | T | GGNSTSQGFAEQLIQELIKVT       | D | -0.2  | 4.26  |              |
| 153 | Cg0683    | 1 | 1140.5564 | -4.4  | 508   | 517 | 0  | 35.6  | 35 | A | NRGYATVYPT                  | A | -0.8  | 9.58  |              |
| 153 | Cg0683    | 1 | 1193.6153 | -1.0  | 342   | 351 | 0  | 47.4  | 35 | V | RRFLGDSEKS                  | L | -1.5  | 10.08 |              |
| 155 | Cg2571    | 1 | 1610.8953 | -1.4  | 182   | 196 | 0  | 59.2  | 35 | T | GMGVPELLDKVVELI             | P | 0.9   | 3.82  |              |
| 155 | Cg2571    | 1 | 1977.0856 | 14.5  | 182   | 200 | 0  | 64.6  | 34 | T | GMGVPELLDKVVELIPAPT         | S | 0.6   | 3.82  |              |
| 156 | Cg3237    | 1 | 1144.5045 | 4.0   | 158   | 166 | 0  | 44.2  | 33 | V | LMLDMWEHA                   | F | 0.2   | 4.06  |              |
| 156 | Cg3237    | 1 | 2291.0997 | -1.0  | 2     | 21  | 0  | 98.0  | 37 | M | AVYELPELDYAYDALEPHIA        | A | 0.0   | 3.5   |              |
| 157 | Cg0007    | 1 | 1249.6893 | 1.8   | 556   | 565 | 0  | 39.5  | 34 | T | LLFRFMPDLV                  | A | 1.4   | 6.78  |              |
| 157 | Cg0007    | 1 | 1350.737  | -0.1  | 555   | 565 | 0  | 55.5  | 35 | L | TLLFRFMPDLV                 | A | 1.2   | 6.78  |              |
| 157 | Cg0007    | 1 | 1510.7092 | -8.5  | 168   | 179 | 0  | 44.1  | 35 | I | RFWPDAEIFETT                | E | -0.6  | 3.82  |              |
| 161 | Cg1234    | 1 | 2001.1034 | -7.3  | 711   | 728 | 0  | 49.3  | 36 | T | LLDLFDQLVDDGKSVIVI          | E | 0.9   | 3.42  |              |
| 164 | Cg1133    | 1 | 1542.7678 | -5.8  | 11    | 23  | 0  | 38.1  | 36 | V | RYQPLNELDPEVA               | A | -1.0  | 3.82  |              |

| hit | accession | z | mass      | ppm   | start | end | mc | score | id | - | sequence                 | + | gravy | pl    | modification |
|-----|-----------|---|-----------|-------|-------|-----|----|-------|----|---|--------------------------|---|-------|-------|--------------|
| 164 | Cg1133    | 1 | 2022.9588 | -1.2  | 181   | 197 | 0  | 68.4  | 36 | A | GWSAYPRHLDFEAFQSI        | A | -0.4  | 5.22  |              |
| 165 | Cg0062    | 1 | 1354.7245 | -8.6  | 171   | 182 | 0  | 45.7  | 36 | T | LEQFPALPGDRL             | L | -0.2  | 4.08  |              |
| 168 | Cg2833    | 1 | 2084.1518 | -1.2  | 227   | 244 | 0  | 60.9  | 35 | A | NFIPEVLDRKVLDDVLTV       | S | 0.4   | 3.96  |              |
| 173 | Cg2262    | 1 | 2709.2756 | 7.5   | 126   | 149 | 0  | 108.4 | 37 | A | TPEPETSDDVVEEPEVKEPEVKEV | V | -1.3  | 3.56  |              |
| 175 | Cg3018    | 1 | 1968.0833 | -29.8 | 908   | 923 | 0  | 68.7  | 37 | I | VFDSLPPIEKQWRQI          | T | -0.2  | 7.02  |              |
| 176 | Cg3191    | 1 | 2173.1783 | -9.1  | 498   | 517 | 0  | 103.5 | 37 | D | FLAGPDQLFSILDTSLPRIA     | A | 0.6   | 3.88  |              |
| 181 | Cg2925    | 1 | 878.4399  | 11.7  | 101   | 107 | 0  | 41.3  | 35 | A | NWFSAV                   | K | -0.1  | 11.04 |              |
| 181 | Cg2925    | 1 | 974.5008  | 2.4   | 285   | 292 | 0  | 36.6  | 36 | A | MRWVGDLV                 | A | 0.6   | 6.78  |              |
| 182 | Cg1082    | 1 | 1109.587  | 1.9   | 197   | 206 | 0  | 53.5  | 34 | I | RFVFGDSIVA               | D | 1.1   | 6.78  |              |
| 186 | Cg3220    | 1 | 828.4705  | -28.4 | 29    | 37  | 0  | 38.5  | 36 | L | ASLGAQVIA                | E | 1.5   | 6.02  |              |
| 189 | Cg0336    | 1 | 2409.1673 | -7.1  | 775   | 795 | 0  | 43.6  | 37 | S | TNNRGTIEDAINDAINQFFR     | - | -0.8  | 4.3   |              |
| 193 | Cg0326    | 1 | 1231.7441 | 0.8   | 520   | 528 | 0  | 36.8  | 28 | V | LFRKELWKI                | A | -0.2  | 10.58 |              |
| 193 | Cg0326    | 1 | 1252.675  | -0.4  | 551   | 561 | 0  | 34.4  | 34 | A | NLLGKFFGRMA              | D | 0.4   | 11.48 |              |
| 196 | Cg1836    | 1 | 1684.8519 | -9.3  | 68    | 82  | 0  | 49.5  | 37 | S | SISELGPELEERDIV          | A | -0.3  | 3.58  |              |
| 196 | Cg1836    | 1 | 1856.9367 | -0.3  | 68    | 84  | 0  | 41.7  | 37 | S | SISELGPELEERDIVAT        | N | -0.2  | 3.58  |              |
| 199 | Cg1861    | 1 | 1466.7154 | 1.5   | 280   | 291 | 0  | 40.9  | 36 | V | RGRDFDDIFDLV             | G | -0.4  | 3.88  |              |
| 200 | Cg1841    | 1 | 2191.2041 | -4.9  | 190   | 208 | 0  | 56.4  | 36 | G | TFYALPQSPQLFKQLLQVA      | G | 0.2   | 9.72  |              |
| 202 | Cg0854    | 1 | 2062.1098 | -9.1  | 159   | 175 | 0  | 48.9  | 37 | A | YAEYLNELVDLKNIRPL        | K | -0.3  | 4.44  |              |
| 203 | Cg0410    | 1 | 1860.0145 | -4.2  | 286   | 301 | 0  | 61.4  | 36 | V | LLLKEFLEGGDRDFQPV        | F | 0.0   | 4.44  |              |
| 204 | Cg1195    | 1 | 1435.7249 | -0.6  | 208   | 219 | 0  | 42.8  | 37 | V | GFFHLDRFGLEV             | I | 0.4   | 5.22  |              |
| 207 | Cg2657    | 1 | 2145.0127 | -0.1  | 165   | 185 | 0  | 122.2 | 36 | V | ATDETPNYYPGGNVAGRVPVA    | G | -0.8  | 4.08  |              |
| 212 | Cg1345    | 1 | 1765.81   | -1.4  | 346   | 359 | 0  | 50.0  | 35 | S | RAETPDDFWPFLWS           | M | -0.7  | 3.7   |              |
| 215 | Cg0783    | 1 | 1848.941  | -0.7  | 260   | 275 | 0  | 43.6  | 37 | V | FLGKFGEIFTFNSQKS         | L | -0.1  | 9.88  |              |
| 218 | Cg2470    | 1 | 1796.854  | -3.2  | 308   | 323 | 0  | 51.7  | 36 | I | NEDAAERQGV EIPQEI        | L | -1.1  | 3.58  |              |
| 218 | Cg2470    | 1 | 2172.0698 | -1.7  | 305   | 323 | 0  | 51.2  | 37 | T | YVINEDAAERQGV EIPQEI     | L | -0.5  | 3.58  |              |
| 220 | Cg2613    | 1 | 1701.9123 | 0.9   | 59    | 73  | 0  | 36.5  | 36 | V | AMELLDSAFP LLRNI         | T | 0.7   | 4.08  |              |
| 220 | Cg2613    | 1 | 1774.8315 | 2.5   | 215   | 228 | 0  | 51.3  | 36 | V | DHDWYVEEFIPRVA           | N | -0.6  | 4.06  |              |
| 220 | Cg2613    | 1 | 2102.0109 | -6.5  | 212   | 228 | 0  | 51.3  | 36 | T | DLVDHDWYVEEFIPRVA        | N | -0.2  | 3.84  |              |
| 223 | Cg1502    | 1 | 1419.7048 | -6.7  | 97    | 107 | 0  | 47.5  | 37 | V | FQNFNLFPHRT              | V | -0.8  | 11.04 |              |
| 224 | Cg3161    | 1 | 791.4905  | -1.0  | 336   | 342 | 0  | 26.7  | 23 | S | HISLPLL                  | G | 1.5   | 7.84  |              |
| 227 | Cg0602    | 1 | 1693.9515 | -11.2 | 67    | 81  | 0  | 42.9  | 35 | I | NIFPDRPLTQKPLGV          | R | -0.4  | 10.08 |              |
| 228 | Cg3244    | 1 | 1133.7536 | 2.5   | 94    | 103 | 0  | 44.2  | 16 | A | RVLTPLLLPI               | I | 1.6   | 11.04 |              |
| 228 | Cg3244    | 1 | 1845.9221 | -2.4  | 159   | 174 | 0  | 77.9  | 37 | A | GFVRDVEERLNELEAA         | A | -0.5  | 4     |              |
| 229 | Cg0523    | 1 | 2292.0182 | -5.4  | 266   | 284 | 0  | 50.1  | 32 | A | VGDDIQNDPETWEDYELRV      | N | -1.3  | 3.28  |              |
| 232 | Cg2437    | 1 | 1399.7136 | 3.3   | 324   | 334 | 0  | 57.7  | 36 | A | SNFERFIFDLL              | G | 0.4   | 4.08  |              |
| 232 | Cg2437    | 1 | 1598.7213 | 3.0   | 287   | 299 | 0  | 48.0  | 34 | A | TNENDVLDEFFRT            | G | -1.0  | 3.58  |              |
| 235 | Cg3429    | 1 | 944.5484  | 0.4   | 111   | 118 | 0  | 57.8  | 34 | V | FLGLFHVL                 | R | 2.2   | 7.84  |              |
| 236 | Cg1365    | 1 | 1975.0011 | -2.1  | 114   | 130 | 0  | 53.1  | 37 | A | EKQGQLGQVEDELFRLS        | R | -0.9  | 4.16  |              |
| 236 | Cg1365    | 1 | 2046.0382 | -8.9  | 113   | 130 | 0  | 74.3  | 37 | S | AEKQGQLGQVEDELFRLS       | R | -0.8  | 4.16  |              |
| 237 | Cg2800    | 1 | 2496.257  | -3.4  | 405   | 426 | 0  | 58.5  | 38 | A | SFLRMDGTTWSTDKDGLILDLL   | A | 0.0   | 3.88  |              |



| hit | accession | z | mass      | ppm   | start | end | mc | score | id | - | sequence                 | + | gravy | pl    | modification  |
|-----|-----------|---|-----------|-------|-------|-----|----|-------|----|---|--------------------------|---|-------|-------|---------------|
| 238 | Cg2176    | 1 | 1709.8234 | -0.2  | 206   | 222 | 0  | 50.6  | 36 | A | NNPFSTGGGERPAPRPG        | G | -1.4  | 10.88 |               |
| 239 | Cg1227    | 1 | 1260.6575 | 8.6   | 190   | 201 | 0  | 46.1  | 36 | T | GALDRFAAGREV             | - | -0.1  | 7.04  |               |
| 239 | Cg1227    | 1 | 1427.7925 | -0.4  | 120   | 130 | 0  | 45.3  | 35 | A | LFLYRRYSLPT              | T | 0.0   | 10.2  |               |
| 239 | Cg1227    | 1 | 1645.898  | -2.2  | 118   | 130 | 0  | 46.7  | 36 | I | FALFLYRRYSLPT            | T | 0.3   | 10.2  |               |
| 240 | Cg0952    | 1 | 1020.4876 | 2.0   | 24    | 32  | 0  | 43.7  | 36 | A | SPEFGELRS                | K | -0.9  | 4.26  |               |
| 240 | Cg0952    | 1 | 1129.5743 | 5.7   | 33    | 41  | 0  | 55.8  | 37 | S | KFRSFAPPM                | T | 0.1   | 11.48 |               |
| 240 | Cg0952    | 1 | 1145.5692 | 3.2   | 33    | 41  | 0  | 43.6  | 36 | S | KFRSFAPPM                | T | 0.1   | 11.48 | Oxidation (M) |
| 240 | Cg0952    | 1 | 1611.6987 | -0.9  | 15    | 28  | 0  | 51.3  | 32 | T | AQEFRDMPQASPEFG          | E | -1.0  | 3.82  |               |
| 243 | Cg0559    | 1 | 2251.0719 | 5.6   | 232   | 250 | 0  | 45.0  | 37 | G | MIFQIVDDIIDIFSETES       | G | 0.4   | 3.42  |               |
| 243 | Cg0559    | 1 | 2632.3596 | -5.7  | 280   | 302 | 0  | 61.9  | 38 | A | ELRDILTGPLEDDETIVNHVLELL | S | -0.1  | 3.68  |               |
| 244 | Cg3323    | 1 | 1524.7249 | 6.3   | 43    | 55  | 0  | 49.4  | 36 | V | KFGDYHVGDIIEFV           | A | -0.1  | 4.3   |               |
| 244 | Cg3323    | 1 | 2095.9601 | 0.5   | 216   | 233 | 0  | 39.1  | 35 | T | MQLNVGGNMDFKNMLDRN       | R | -0.7  | 6.9   |               |
| 246 | Cg1229    | 1 | 757.4163  | 3.4   | 244   | 249 | 0  | 36.7  | 36 | T | GFFKFL                   | G | 1.3   | 10.1  |               |
| 246 | Cg1229    | 1 | 1917.0036 | -4.6  | 73    | 88  | 0  | 50.4  | 37 | A | LYGRPDGKEYFSFLLI         | H | 0.0   | 6.88  |               |
| 247 | Cg1435    | 1 | 2140.1357 | -8.7  | 191   | 208 | 0  | 78.2  | 37 | A | ELDFVWPPKIDLPGRYPV       | S | -0.3  | 4.3   |               |
| 249 | Cg0928    | 1 | 2029.9633 | -8.1  | 121   | 136 | 0  | 65.5  | 35 | I | DFFNLTELEDRLDQL          | S | -0.6  | 3.42  |               |
| 251 | Cg1456    | 1 | 2477.2478 | -4.0  | 6     | 27  | 0  | 59.9  | 38 | M | SVELEEIRDLAGFEPFAQLPA    | E | 0.2   | 3.58  |               |
| 252 | Cg2527    | 1 | 1362.6833 | 2.5   | 454   | 465 | 0  | 49.4  | 37 | I | FHEFGHGLHGLL             | S | 0.2   | 6.3   |               |
| 260 | Cg2675    | 1 | 1844.9376 | -6.4  | 194   | 209 | 0  | 68.5  | 37 | I | ILDLLEDMQRELGMGI         | L | 0.3   | 3.58  |               |
| 263 | Cg3011    | 1 | 1917.9908 | -19.8 | 6     | 22  | 0  | 42.4  | 37 | I | AFDEEARRGLEKGLNLT        | A | -0.8  | 4.64  |               |
| 264 | Cg2092    | 1 | 2689.381  | -4.9  | 418   | 441 | 0  | 105.4 | 38 | V | SFTLLQDQLQDVLETLSEREAGVV | K | 0.0   | 3.5   |               |
| 269 | Cg2846    | 1 | 1163.6492 | -1.8  | 133   | 142 | 0  | 36.9  | 34 | A | WHLPFVIGPV               | A | 1.2   | 7.84  |               |
| 269 | Cg2846    | 1 | 1885.9058 | -0.9  | 327   | 342 | 0  | 61.3  | 36 | A | GYDETRDQVKDFLTV          | A | -0.9  | 3.96  |               |
| 270 | Cg1562    | 1 | 1739.8155 | 1.3   | 365   | 378 | 0  | 35.4  | 35 | I | ALEEWRSFETNPV            | S | -0.8  | 3.96  |               |
| 273 | Cg3405    | 1 | 1775.9168 | 4.4   | 130   | 144 | 0  | 61.3  | 37 | I | SLLDFLDMKPGEWLI          | Q | 0.4   | 3.7   |               |
| 275 | Cg2372    | 1 | 1150.5447 | 0.6   | 356   | 364 | 0  | 44.9  | 35 | V | FYSDWLHLA                | E | 0.3   | 4.94  |               |
| 278 | Cg0508    | 1 | 1634.7649 | -2.7  | 231   | 247 | 0  | 48.0  | 35 | A | QSNQPTSQEIAGGGHPV        | G | -0.8  | 5.12  |               |
| 278 | Cg0508    | 1 | 1781.8294 | 3.4   | 76    | 90  | 0  | 66.0  | 35 | A | FMEANPDIEVEYRA           | G | -0.2  | 3.68  |               |
| 280 | Cg2261    | 1 | 1545.706  | -0.6  | 406   | 418 | 0  | 45.3  | 34 | A | TVGWRVDDDDVEQQ           | G | -1.1  | 3.5   |               |
| 283 | Cg2151    | 1 | 2551.4016 | -4.3  | 52    | 72  | 0  | 56.0  | 36 | V | IGNQRQLEMQLNRRRLAEIEKL   | Q | -0.9  | 10.08 |               |
| 284 | Cg0153    | 1 | 1698.8537 | 27.5  | 146   | 164 | 0  | 38.9  | 36 | R | VAIGGDSAGGNIAAVTAQQ      | L | 0.5   | 3.1   |               |
| 284 | Cg0153    | 1 | 1715.8802 | 17.7  | 143   | 161 | 0  | 39.4  | 37 | D | TSRVAIGGDSAGGNIAAVT      | A | 0.4   | 6.78  |               |
| 287 | Cg3189    | 1 | 1945.9381 | -0.3  | 285   | 304 | 0  | 112.4 | 37 | I | AILRYAAGVDTGDGGAPDEV     | A | 0.0   | 3.5   |               |
| 291 | Cg0249    | 1 | 1501.7816 | 0.0   | 244   | 255 | 0  | 82.6  | 37 | A | ELNPLYHYLEIV             | R | 0.2   | 4.24  |               |
| 292 | Cg3255    | 1 | 2185.0976 | -1.0  | 52    | 70  | 0  | 67.3  | 38 | G | MVPPQELFDDLQAEALEKI      | N | -0.2  | 3.5   |               |
| 295 | Cg0915    | 1 | 2086.0178 | -14.0 | 154   | 172 | 0  | 36.3  | 36 | S | NVIDQVDDLRGATENLDSI      | R | -0.4  | 3.36  |               |
| 303 | Cg4005    | 1 | 1499.762  | 1.1   | 69    | 81  | 0  | 72.9  | 37 | A | ELQLEDTPVPRFG            | F | -0.6  | 3.82  |               |
| 303 | Cg4005    | 1 | 1991.9476 | -14.3 | 69    | 85  | 0  | 41.1  | 35 | A | ELQLEDTPVPRFGFDET        | Q | -0.8  | 3.5   |               |
| 303 | Cg4005    | 1 | 2320.1223 | -1.3  | 69    | 88  | 0  | 52.3  | 37 | A | ELQLEDTPVPRFGFDETQSI     | L | -0.6  | 3.5   |               |
| 310 | Cg2968    | 1 | 915.4913  | 27.9  | 301   | 309 | 0  | 51.4  | 36 | A | IIDVTLDGA                | K | 1.2   | 2.92  |               |

| hit | accession | z | mass      | ppm   | start | end | mc | score | id | - | sequence                    | + | gravy | pl    | modification |
|-----|-----------|---|-----------|-------|-------|-----|----|-------|----|---|-----------------------------|---|-------|-------|--------------|
| 311 | Cg1911    | 1 | 1260.5451 | -0.9  | 168   | 176 | 0  | 35.5  | 32 | M | SFRFDYYYY                   | V | -0.9  | 6.58  |              |
| 311 | Cg1911    | 1 | 1579.8318 | -4.2  | 123   | 137 | 0  | 38.4  | 36 | I | DANNSLIQPRSIVPG             | S | -0.3  | 6.78  |              |
| 311 | Cg1911    | 1 | 2487.203  | -5.7  | 88    | 108 | 0  | 68.5  | 37 | Q | KHPVDIEDFENEQKGKGTIERF      | A | -1.3  | 4.42  |              |
| 314 | Cg1794    | 1 | 1914.0305 | -0.2  | 210   | 224 | 0  | 41.7  | 37 | V | RFLPNPFWVPELRPF             | R | -0.2  | 10.88 |              |
| 321 | Cg0250    | 1 | 1691.8883 | -0.4  | 296   | 310 | 0  | 93.2  | 36 | G | LFEHLVESLEGLHAV             | H | 0.7   | 4.52  |              |
| 323 | Cg1582    | 1 | 1385.8031 | -0.5  | 106   | 118 | 0  | 63.4  | 33 | V | LFGQVGRDLVGLI               | N | 1.1   | 6.78  |              |
| 326 | Cg0949    | 1 | 1618.7701 | -22.3 | 15    | 28  | 0  | 63.0  | 34 | A | VLHYPGGEFEMDII              | E | 0.3   | 3.82  |              |
| 328 | Cg0134    | 1 | 2166.1896 | -7.7  | 302   | 321 | 0  | 39.5  | 36 | S | LLPEALKDISKRVDVLDGA         | A | 0.0   | 4.12  |              |
| 335 | Cg0327    | 1 | 986.6164  | 19.4  | 364   | 373 | 0  | 24.9  | 24 | L | FGALGILLLA                  | T | 2.5   | 6.02  |              |
| 343 | Cg1109    | 1 | 1860.9217 | -2.3  | 59    | 75  | 0  | 56.3  | 37 | A | AGVLEEGQYNRELAEL            | A | -0.3  | 3.8   |              |
| 344 | Cg0464    | 1 | 1279.6138 | -7.8  | 154   | 164 | 0  | 53.4  | 35 | I | FFWGGSPFHKA                 | T | -0.1  | 10.1  |              |
| 348 | Cg2361    | 1 | 2217.0801 | -3.5  | 39    | 56  | 0  | 59.8  | 37 | A | LVQFQENEDLKQQVEEL           | E | -1.1  | 3.5   |              |
| 349 | Cg1829    | 1 | 1274.7234 | -1.5  | 162   | 172 | 0  | 41.8  | 34 | S | FLRETLGVEVL                 | S | 0.9   | 4.26  |              |
| 349 | Cg1829    | 1 | 1637.8083 | 16.7  | 389   | 401 | 0  | 37.6  | 36 | S | NIDTYLKNIEERM               | K | -1.0  | 4.44  |              |
| 350 | Cg1268    | 1 | 1638.8366 | -10.7 | 172   | 185 | 0  | 37.8  | 36 | V | LNGIDTELWQPRPT              | F | -0.9  | 4.08  |              |
| 351 | Cg0040    | 1 | 2032.945  | -0.7  | 269   | 288 | 0  | 35.5  | 35 | V | QAPDSYGRIGNQSGSDVSPV        | V | -0.8  | 3.88  |              |
| 351 | Cg0040    | 1 | 2216.1437 | -6.7  | 289   | 307 | 0  | 56.2  | 38 | V | VLGDYKVDKADLERPERV          | S | -1.0  | 4.3   |              |
| 353 | Cg1164    | 1 | 902.5113  | -5.4  | 160   | 167 | 0  | 40.1  | 35 | G | IATLPEFL                    | N | 1.4   | 3.3   |              |
| 353 | Cg1164    | 1 | 1550.9032 | -8.7  | 282   | 295 | 0  | 33.7  | 32 | A | SVPEILVQGVIERL              | A | 0.8   | 4.26  |              |
| 353 | Cg1164    | 1 | 1621.9403 | -1.7  | 282   | 296 | 0  | 35.3  | 32 | A | SVPEILVQGVIERLA             | E | 0.9   | 4.26  |              |
| 357 | Cg0451    | 1 | 1290.7601 | 0.7   | 85    | 94  | 0  | 32.4  | 30 | A | LFRLPLWLPI                  | P | 0.7   | 11.04 |              |
| 357 | Cg0451    | 1 | 1705.9151 | -1.5  | 188   | 203 | 0  | 53.4  | 36 | T | WGPPAGRLLLEQLLAEG           | K | -0.1  | 4.26  |              |
| 359 | Cg2300    | 1 | 2033.9193 | -7.3  | 130   | 146 | 0  | 34.8  | 33 | T | NSPMFEGISPDERFYFV           | H | -0.4  | 3.82  |              |
| 360 | Cg1128    | 1 | 829.397   | 3.6   | 29    | 37  | 0  | 34.7  | 34 | Q | GGPLGPEFG                   | K | -0.2  | 3.3   |              |
| 360 | Cg1128    | 1 | 1677.7999 | -10.6 | 74    | 88  | 0  | 51.8  | 36 | I | FAERNGLDPFIDIEGV            | R | -0.3  | 3.58  |              |
| 366 | Cg1629    | 1 | 1727.9669 | -28.0 | 342   | 358 | 0  | 37.8  | 37 | L | AVSEGGKILDITLQAL            | I | 0.6   | 4.08  |              |
| 370 | Cg1594    | 1 | 1649.6958 | 3.0   | 382   | 394 | 0  | 59.1  | 31 | V | NNERIESDDWEPF               | A | -1.9  | 3.5   |              |
| 372 | Cg1005    | 1 | 1318.7649 | -6.3  | 313   | 323 | 0  | 47.4  | 32 | S | LVIFETFVRPV                 | V | 1.5   | 6.98  |              |
| 372 | Cg1005    | 1 | 2436.2683 | -5.7  | 392   | 413 | 0  | 44.7  | 38 | A | NGMIRIPEDVTEIRPGDVVDVI      | F | 0.1   | 3.84  |              |
| 376 | Cg1333    | 1 | 2541.2136 | 5.1   | 106   | 128 | 0  | 38.6  | 37 | I | LAQGETFGNSDHLSHLDVNLEFV     | S | -0.1  | 4.06  |              |
| 388 | Cg1855    | 1 | 1933.9462 | 8.3   | 46    | 62  | 0  | 90.0  | 37 | A | GFEHIELPIFEDTGLFA           | R | 0.4   | 3.68  |              |
| 392 | Cg0528    | 1 | 1947.885  | 14.2  | 42    | 57  | 0  | 92.0  | 36 | V | KGPDDDEEFLWNIEKN            | R | -1.7  | 3.76  |              |
| 399 | Cg0085    | 1 | 915.5025  | 15.6  | 312   | 319 | 0  | 51.4  | 36 | N | IIDEALSR                    | G | 0.3   | 4.08  |              |
| 403 | Cg1418    | 1 | 1878.9839 | -1.5  | 322   | 338 | 0  | 55.8  | 37 | T | RFALDALVPLLEEHAEG           | - | 0.2   | 4.16  |              |
| 412 | Cg2862    | 1 | 1810.8697 | -1.9  | 396   | 411 | 0  | 55.5  | 36 | V | ARPENQDELQLEGEIA            | R | -1.2  | 3.58  |              |
| 413 | Cg2474    | 1 | 2979.5263 | -7.5  | 6     | 32  | 0  | 43.0  | 38 | I | SYLTDMDGVLIKEGEIIPGADRFLQSL | T | 0.1   | 3.84  |              |
| 414 | Cg3049    | 1 | 2176.0874 | -2.4  | 27    | 45  | 0  | 50.1  | 37 | S | DTDVQIDLFERMPAPFGLI         | R | 0.2   | 3.5   |              |
| 416 | Cg2052    | 1 | 1138.6175 | -1.8  | 200   | 209 | 0  | 34.2  | 34 | A | FPNIPWVGPI                  | S | 0.6   | 6.02  |              |
| 416 | Cg2052    | 1 | 1209.6546 | 0.9   | 199   | 209 | 0  | 37.2  | 34 | V | AFPNIWVGPI                  | S | 0.7   | 6.02  |              |
| 419 | Cg0291    | 1 | 1764.7955 | -1.9  | 205   | 219 | 0  | 44.3  | 34 | I | HFEVFPDRDSITDST             | N | -0.8  | 3.96  |              |

| hit | accession | z | mass      | ppm   | start | end | mc | score | id | - | sequence                    | + | gravy | pl    | modification  |
|-----|-----------|---|-----------|-------|-------|-----|----|-------|----|---|-----------------------------|---|-------|-------|---------------|
| 421 | Cg3069    | 1 | 2395.1188 | -0.9  | 175   | 195 | 0  | 47.7  | 36 | I | TDWIFDNLIDGDGLVMDGLRM       | R | 0.1   | 3.3   |               |
| 422 | Cg0237    | 1 | 990.5651  | 1.2   | 240   | 247 | 0  | 34.9  | 33 | A | FQFIPRAI                    | F | 0.9   | 11.04 |               |
| 426 | Cg0413    | 1 | 1699.7492 | -0.2  | 339   | 352 | 0  | 42.5  | 32 | T | GTHSWGWWQDDLRLG             | S | -1.4  | 5.1   |               |
| 428 | Cg1796    | 1 | 1491.7432 | 5.2   | 153   | 164 | 0  | 75.1  | 37 | A | RLELPDFEFVPM                | W | 0.1   | 3.82  |               |
| 430 | Cg2510    | 1 | 3103.4444 | 12.3  | 202   | 228 | 0  | 68.1  | 37 | V | MTDLLPEGPKFYPPDDHITDEDNTRIA | E | -1.0  | 3.84  |               |
| 435 | Cg0867    | 1 | 1924.9755 | -7.6  | 17    | 33  | 0  | 49.7  | 37 | V | SITGRNVEVPDHFHAERV          | N | -0.5  | 5.34  |               |
| 437 | Cg2408    | 1 | 1456.6834 | 0.1   | 66    | 77  | 0  | 66.2  | 35 | V | RVDVLPEDWEEA                | E | -0.9  | 3.5   |               |
| 438 | Cg2235    | 1 | 964.4978  | -0.6  | 64    | 72  | 0  | 48.6  | 35 | V | SFGIGVERT                   | F | 0.1   | 6.98  |               |
| 441 | Cg0936    | 1 | 1206.5418 | 7.8   | 58    | 69  | 0  | 62.1  | 35 | T | GNGYHGGLQFSA                | S | -0.5  | 7.76  |               |
| 441 | Cg0936    | 1 | 1421.6324 | 1.1   | 56    | 69  | 0  | 54.0  | 34 | I | NTGNGYHGGLQFSA              | S | -0.7  | 7.76  |               |
| 443 | Cg1859    | 1 | 1763.8577 | 2.2   | 79    | 95  | 0  | 90.3  | 37 | V | KVIAGEAESFTSDNLPS           | G | -0.2  | 3.82  |               |
| 454 | Cg3107    | 1 | 1263.6976 | -8.9  | 306   | 316 | 0  | 54.1  | 35 | L | DFFARGLIKPT                 | V | 0.1   | 10.08 |               |
| 457 | Cg1228    | 1 | 1557.7998 | -0.9  | 346   | 358 | 0  | 46.3  | 37 | V | DASERIEELLDR                | R | -0.7  | 3.92  |               |
| 469 | Cg1789    | 1 | 1440.7653 | -7.0  | 28    | 39  | 0  | 59.0  | 36 | L | AFALPKEYFEKV                | D | 0.0   | 7     |               |
| 472 | Cg0628    | 1 | 2316.1921 | -15.6 | 105   | 127 | 0  | 65.6  | 38 | I | STSQGLLTDRQATEKGVGGEVLA     | Y | -0.3  | 4.44  |               |
| 475 | Cg2325    | 1 | 981.4742  | 5.5   | 24    | 31  | 0  | 36.5  | 34 | A | DFFRPMGI                    | N | 0.3   | 6.78  |               |
| 475 | Cg2325    | 1 | 985.5022  | 0.9   | 13    | 20  | 0  | 40.5  | 35 | A | DFLHVWGL                    | T | 0.8   | 4.94  |               |
| 475 | Cg2325    | 1 | 1086.5499 | 3.0   | 13    | 21  | 0  | 56.3  | 36 | A | DFLHVWGLT                   | V | 0.7   | 4.94  |               |
| 477 | Cg0779    | 1 | 1234.6386 | 5.4   | 49    | 58  | 0  | 40.1  | 36 | A | FYFIPDLHAI                  | T | 1.1   | 4.94  |               |
| 488 | Cg0680    | 1 | 2657.2802 | 9.6   | 260   | 282 | 0  | 41.3  | 38 | V | VSYFGQELQEHAFFPKDTSFPAFL    | N | -0.2  | 4.42  |               |
| 489 | Cg2199    | 1 | 1011.5825 | -5.8  | 258   | 266 | 0  | 33.7  | 33 | A | PDIVSRVAR                   | I | 0.0   | 10.88 |               |
| 490 | Cg1574    | 1 | 1177.6496 | 5.9   | 334   | 343 | 0  | 49.3  | 33 | G | DIRFTLPFGI                  | Q | 0.8   | 6.78  |               |
| 493 | Cg2368    | 1 | 3121.5549 | 2.3   | 201   | 227 | 0  | 57.3  | 38 | L | DFFKTPEAYFQVFDDFAGRITPNGKLV | V | -0.2  | 4.46  |               |
| 512 | Cg1436    | 1 | 2293.2529 | -5.8  | 57    | 76  | 0  | 83.7  | 36 | V | DADELNIEQITKQLNKLIPV        | L | -0.4  | 4.06  |               |
| 517 | Cg1337    | 1 | 1066.6611 | -9.0  | 152   | 161 | 0  | 30.7  | 29 | P | VVGPLRRSLA                  | G | 0.6   | 12.4  |               |
| 537 | Cg3096    | 1 | 1092.5604 | -1.1  | 399   | 407 | 0  | 52.0  | 35 | I | FREEIFGPV                   | L | 0.1   | 4.26  |               |
| 539 | Cg2841    | 1 | 1333.5431 | -28.2 | 101   | 112 | 0  | 30.7  | 23 | L | ADHIDMNFQCPV                | P | 0.2   | 3.88  | Oxidation (M) |
| 543 | Cg2876    | 1 | 1778.9389 | -4.1  | 360   | 373 | 0  | 58.2  | 36 | A | MIERELERYLPFLA              | T | 0.0   | 4.56  |               |
| 557 | Cg2154    | 1 | 1500.83   | -3.3  | 87    | 100 | 0  | 71.5  | 36 | A | RGLVTDFGKIADPI              | A | 0.2   | 6.9   |               |
| 559 | Cg1604    | 1 | 2475.3221 | 1.3   | 66    | 88  | 0  | 51.6  | 37 | A | DSIIDHIVEDVVAGTLTDRPVLV     | M | 0.6   | 3.76  |               |
| 564 | Cg2100    | 1 | 997.6171  | -25.8 | 79    | 88  | 0  | 34.4  | 32 | K | LAALLGEALK                  | T | 1.3   | 6.94  |               |
| 565 | Cg1247    | 1 | 1881.8704 | -0.6  | 87    | 105 | 0  | 49.1  | 35 | T | GDGSEGGDIEIPDNAPRIA         | Q | -0.7  | 3.42  |               |
| 568 | Cg2440    | 1 | 1187.6855 | 0.2   | 135   | 143 | 0  | 34.6  | 33 | M | RILPFWFPL                   | K | 1.0   | 11.04 |               |
| 570 | Cg1665    | 1 | 1181.4989 | 1.9   | 189   | 199 | 0  | 47.0  | 32 | I | SWLDDGSGQFA                 | A | -0.5  | 2.92  |               |
| 570 | Cg1665    | 1 | 1252.536  | -1.0  | 189   | 200 | 0  | 51.9  | 32 | I | SWLDDGSGQFAA                | S | -0.3  | 2.92  |               |
| 571 | Cg3068    | 1 | 1717.8345 | 3.5   | 2     | 16  | 0  | 57.8  | 37 | M | PIATPEVYNEMLDRA             | K | -0.4  | 3.82  |               |
| 590 | Cg0939    | 1 | 1669.6896 | -0.2  | 105   | 118 | 0  | 87.4  | 28 | T | IYDDPAANDEFYHT              | S | -1.1  | 3.5   |               |
| 592 | Cg0655    | 1 | 1793.9352 | -2.2  | 20    | 35  | 0  | 57.8  | 37 | S | RFVIEPLEPGFGYTLG            | N | 0.3   | 4.26  |               |
| 595 | Cg3325    | 1 | 2002.1099 | -6.8  | 463   | 481 | 0  | 43.3  | 36 | T | TILGSVDEGIFRNGLVLT          | S | 0.9   | 4.08  |               |
| 597 | Cg0565    | 1 | 798.4123  | 15.0  | 479   | 485 | 0  | 33.5  | 33 | E | IDLNDPL                     | T | 0.0   | 2.92  |               |

| hit | accession | z | mass      | ppm   | start | end | mc | score | id | - | sequence                    | + | gravy | pl    | modification  |
|-----|-----------|---|-----------|-------|-------|-----|----|-------|----|---|-----------------------------|---|-------|-------|---------------|
| 610 | Cg0873    | 1 | 862.4913  | 6.8   | 227   | 234 | 0  | 32.1  | 32 | W | VVHPGEIL                    | G | 1.0   | 5.12  |               |
| 616 | Cg2418    | 1 | 1051.5888 | 3.8   | 153   | 160 | 0  | 50.6  | 32 | S | LYLRPFMI                    | S | 1.2   | 9.84  |               |
| 625 | Cg0489    | 1 | 1939.9123 | -6.4  | 88    | 105 | 0  | 56.2  | 35 | A | SVEGDVDKQETPERPAPS          | N | -1.5  | 3.92  |               |
| 631 | Cg0933    | 1 | 1035.5601 | 26.0  | 15    | 23  | 0  | 37.1  | 32 | K | TVLLEIDHP                   | Q | 0.4   | 4.06  |               |
| 642 | Cg0564    | 1 | 1901.0258 | -5.7  | 186   | 202 | 0  | 99.1  | 37 | L | AENYGALLDEIIRIKPS           | S | -0.1  | 4.44  |               |
| 644 | Cg0442    | 1 | 2055.1113 | -5.6  | 227   | 245 | 0  | 40.7  | 37 | A | IFDALRRIEPGAGGELQLT         | D | 0.0   | 4.44  |               |
| 648 | Cg1641    | 1 | 1915.0666 | -4.0  | 2     | 17  | 0  | 40.1  | 35 | M | TFLELKLPEIVREL              | R | 0.1   | 4.16  |               |
| 656 | Cg1432    | 1 | 2013.8817 | 14.0  | 354   | 370 | 0  | 61.6  | 34 | V | HSNDLEGWLDDWDIRSG           | K | -1.2  | 3.76  |               |
| 662 | Cg2342    | 1 | 1055.54   | -0.7  | 161   | 169 | 0  | 55.8  | 35 | V | NLYGSFRVT                   | K | 0.0   | 9.84  |               |
| 667 | Cg2994    | 1 | 1559.7256 | -0.1  | 171   | 183 | 0  | 41.3  | 35 | L | SFERYGKDSPFEV               | S | -1.1  | 4.44  |               |
| 671 | Cg2924    | 1 | 1444.6524 | 0.2   | 80    | 90  | 0  | 36.0  | 34 | A | SENGRPWWEVW                 | S | -1.5  | 4.26  |               |
| 674 | Cg3343    | 1 | 1087.6389 | -4.4  | 99    | 107 | 0  | 43.3  | 33 | A | GIKLEIPRY                   | - | -0.3  | 9.72  |               |
| 674 | Cg3343    | 1 | 1226.5204 | -1.2  | 45    | 54  | 0  | 31.9  | 31 | A | SDYERDIWGS                  | S | -1.5  | 3.7   |               |
| 692 | Cg1129    | 1 | 2479.2383 | -15.0 | 110   | 131 | 0  | 44.0  | 37 | I | VGWKGLINDPHLNETYDIPEGL      | R | -0.5  | 4.06  |               |
| 694 | Cg2460    | 1 | 2131.0069 | -1.8  | 149   | 168 | 0  | 47.6  | 36 | V | NRGYESEGTIVPEIEPAPS         | T | -0.9  | 3.8   |               |
| 698 | Cg1730    | 1 | 1471.8399 | -2.6  | 44    | 57  | 0  | 51.6  | 34 | V | SGGLTLLVPFVDRV              | R | 1.1   | 6.78  |               |
| 703 | Cg1069    | 1 | 1758.9186 | -2.2  | 68    | 83  | 0  | 78.3  | 37 | S | SLDILRELVDMLNGTA            | S | 0.5   | 3.7   |               |
| 704 | Cg1764    | 1 | 1330.6915 | 0.2   | 470   | 481 | 0  | 51.5  | 37 | N | RLIELQMEGSVG                | - | 0.1   | 4.26  |               |
| 706 | Cg1675    | 1 | 2036.9538 | -5.1  | 170   | 187 | 0  | 52.5  | 35 | S | DLKPEDFTKKGKDESDGEK         | - | -2.1  | 4.16  |               |
| 709 | Cg2890    | 1 | 950.5113  | -26.5 | 75    | 82  | 0  | 52.6  | 35 | T | DIFIAYPL                    | Y | 1.4   | 3.1   |               |
| 710 | Cg2676    | 1 | 1081.5669 | 8.0   | 29    | 38  | 0  | 44.8  | 34 | K | ALGNPWTRPA                  | A | -0.6  | 11.04 |               |
| 714 | Cg0594    | 1 | 1988.0401 | -4.1  | 13    | 29  | 0  | 63.7  | 37 | T | KLGMTQIFDEENRVIPV           | T | -0.2  | 4.44  |               |
| 735 | Cg3387    | 1 | 862.5164  | -25.9 | 367   | 374 | 0  | 48.7  | 32 | T | FIIGLSLT                    | T | 2.2   | 6.02  |               |
| 755 | Cg1458    | 1 | 798.4123  | 15.0  | 184   | 190 | 0  | 33.5  | 33 | I | DLNLIPI                     | K | 0.0   | 2.92  |               |
| 756 | Cg1874    | 1 | 1007.4461 | 3.5   | 97    | 105 | 0  | 36.3  | 34 | A | GGWRFSDPS                   | E | -1.1  | 6.78  |               |
| 756 | Cg1874    | 1 | 1444.7714 | -0.2  | 106   | 117 | 0  | 38.7  | 36 | S | EKPHTFFDKILA                | Q | -0.4  | 7.8   |               |
| 788 | Cg2467    | 1 | 1431.8085 | 0.1   | 238   | 249 | 0  | 63.4  | 34 | S | KLTVRDLLQEFA                | N | 0.1   | 7.02  |               |
| 820 | Cg1623    | 1 | 986.6164  | 15.8  | 83    | 92  | 0  | 26.0  | 25 | F | FGGIALIAII                  | D | 2.7   | 6.02  |               |
| 824 | Cg1646    | 1 | 828.4593  | -17.7 | 126   | 133 | 0  | 36.4  | 35 | E | VLDIADLA                    | Q | 1.6   | 2.92  |               |
| 830 | Cg3240    | 1 | 1133.7787 | -19.7 | 108   | 118 | 0  | 18.4  | 16 | T | LAIIVGLILPL                 | V | 3.0   | 6.02  |               |
| 834 | Cg3304    | 1 | 2106.0885 | -1.8  | 96    | 113 | 0  | 65.6  | 37 | T | TVIDILDILTPEDFYRPS          | H | 0.2   | 3.5   |               |
| 841 | Cg1740    | 1 | 1749.8461 | -2.5  | 63    | 77  | 0  | 41.2  | 36 | L | SVEDWADLLKDFDVV             | V | 0.1   | 3.36  |               |
| 850 | Cg0396    | 1 | 3107.5353 | 11.6  | 89    | 114 | 0  | 48.0  | 38 | L | FFLNPDVTVIDDPTLFNSLRRVDEQWA | A | -0.3  | 3.76  |               |
| 857 | Cg3257    | 1 | 876.5069  | 8.1   | 27    | 33  | 0  | 31.4  | 31 | S | RTLFDLL                     | F | 0.8   | 6.78  |               |
| 857 | Cg3257    | 1 | 1207.6601 | 4.2   | 27    | 36  | 0  | 50.6  | 33 | S | RTLFDLLFPS                  | N | 0.6   | 6.78  |               |
| 870 | Cg2362    | 1 | 1059.6917 | 3.0   | 60    | 68  | 0  | 25.0  | 18 | L | RRVIPPLPL                   | G | 0.3   | 12.4  |               |
| 884 | Cg0914    | 1 | 1256.6554 | 0.4   | 83    | 92  | 0  | 47.0  | 36 | I | GYVFQDFRLL                  | K | 0.4   | 6.7   |               |
| 887 | Cg3160    | 1 | 1728.9444 | 6.0   | 22    | 40  | 0  | 42.6  | 35 | V | VGIAVGAVAVVGVSMISGQ         | D | 1.8   | 6.02  | Oxidation (M) |
| 893 | Cg2619    | 1 | 1262.6507 | 2.9   | 208   | 220 | 0  | 36.6  | 36 | M | SFGASLPSTNVLA               | S | 0.7   | 6.02  |               |
| 899 | Cg2561    | 1 | 1773.8322 | -4.1  | 170   | 185 | 0  | 45.7  | 35 | V | FGDHTEGFRDVAEVPV            | T | -0.3  | 4.06  |               |

| hit  | accession | z | mass      | ppm   | start | end | mc | score | id | - | sequence               | + | gravy | pl    | modification  |
|------|-----------|---|-----------|-------|-------|-----|----|-------|----|---|------------------------|---|-------|-------|---------------|
| 958  | Cg3215    | 1 | 2678.3479 | 5.9   | 85    | 106 | 0  | 51.7  | 38 | V | LTLNLLDIFEDYDPDKHLYIET | K | -0.3  | 3.84  |               |
| 967  | Cg0620    | 1 | 1771.0648 | -2.4  | 194   | 209 | 0  | 76.9  | 29 | A | LYQGLITIPGLVLPKF       | - | 1.1   | 9.72  |               |
| 977  | Cg1904    | 1 | 862.5164  | -18.4 | 50    | 57  | 0  | 39.3  | 32 | I | FIIGLSTL               | V | 2.2   | 6.02  |               |
| 977  | Cg1904    | 1 | 1018.5851 | -3.9  | 218   | 226 | 0  | 33.1  | 33 | F | FLLWSILGA              | D | 2.0   | 6.02  |               |
| 979  | Cg0475    | 1 | 2419.1907 | 3.0   | 146   | 167 | 0  | 49.4  | 38 | A | DALGELFANEGALTEKWISENL | - | -0.2  | 3.58  |               |
| 988  | Cg0573    | 1 | 1616.761  | -1.7  | 23    | 35  | 0  | 62.0  | 35 | S | EFVKEFEEVFDVT          | A | -0.1  | 3.58  |               |
| 989  | Cg1341    | 1 | 1011.5865 | -9.8  | 163   | 170 | 0  | 53.6  | 33 | T | ISPWLRQL               | L | 0.1   | 11.04 |               |
| 990  | Cg1505    | 1 | 1607.6892 | -4.6  | 220   | 232 | 0  | 40.5  | 31 | V | SFGSWEYGERYV           | R | -1.1  | 3.96  |               |
| 1002 | Cg3407    | 1 | 978.5135  | 5.3   | 33    | 41  | 0  | 36.8  | 34 | A | RGVFGTTEI              | D | 0.1   | 6.98  |               |
| 1010 | Cg2954    | 1 | 1031.5764 | -6.7  | 17    | 25  | 0  | 43.9  | 35 | A | LLAGNERFI              | S | 0.5   | 6.98  |               |
| 1020 | Cg2604    | 1 | 2475.2605 | -5.6  | 62    | 82  | 0  | 55.4  | 38 | V | VFTQEIQIDQLKELKSRDQEEA | A | -1.1  | 4.28  |               |
| 1052 | Cg0674    | 1 | 1459.7671 | -3.2  | 105   | 116 | 0  | 40.9  | 37 | L | VLLDRENQFDIV           | A | 0.1   | 3.7   |               |
| 1057 | Cg0359    | 1 | 1133.608  | 3.4   | 68    | 77  | 0  | 50.7  | 35 | S | SLFRAEVELA             | K | 0.6   | 4.26  |               |
| 1058 | Cg1731    | 1 | 1030.5997 | 3.1   | 58    | 66  | 0  | 33.9  | 33 | A | ALLMFIRPA              | I | 1.6   | 11.04 |               |
| 1080 | Cg0556    | 1 | 1999.0601 | -7.1  | 156   | 172 | 0  | 52.7  | 37 | V | FGTVYKEYLMRLLPQAA      | R | 0.2   | 9.52  |               |
| 1117 | Cg1635    | 1 | 1615.7002 | 18.5  | 27    | 40  | 0  | 57.9  | 34 | A | DGYLDIDEFDTRTG         | A | -1.0  | 3.36  |               |
| 1121 | Cg1092    | 1 | 862.4834  | 15.9  | 12    | 19  | 0  | 36.3  | 32 | L | IISMGLIT               | A | 2.2   | 6.02  | Oxidation (M) |
| 1132 | Cg1312    | 1 | 1166.5244 | 1.0   | 125   | 133 | 0  | 65.6  | 34 | T | YEIENWDKA              | K | -1.5  | 3.82  |               |
| 1139 | Cg0653    | 1 | 1347.6783 | -1.9  | 88    | 100 | 0  | 44.7  | 37 | V | DVFKVKGPGSGRET         | A | -0.7  | 7.02  |               |
| 1145 | Cg3254    | 1 | 997.5961  | -4.6  | 41    | 50  | 0  | 64.8  | 32 | I | IGGLLGGWLL             | G | 1.7   | 6.02  |               |
| 1148 | Cg3361    | 1 | 1828.0499 | -1.3  | 173   | 189 | 0  | 38.9  | 33 | A | LKFPTIFNTLGPLLSPA      | R | 0.7   | 10.1  |               |
| 1195 | Cg1811    | 1 | 1124.5502 | 1.0   | 98    | 106 | 0  | 43.9  | 35 | A | LLERFGFED              | - | -0.2  | 3.82  |               |
| 1215 | Cg2033    | 1 | 935.4713  | 15.3  | 82    | 90  | 0  | 36.6  | 35 | A | VGKGFADKAD             | A | -0.8  | 6.88  |               |
| 1220 | Cg0726    | 1 | 2621.3489 | -3.8  | 53    | 74  | 0  | 55.9  | 38 | L | ALPEIENSIDLERYKWKYQVA  | A | -0.7  | 4.64  |               |
| 1231 | Cg1072    | 1 | 1121.5869 | -1.2  | 87    | 95  | 0  | 56.1  | 35 | T | FHIDHLDLL              | A | 0.6   | 4.94  |               |
| 1236 | Cg0609    | 1 | 1311.6571 | -0.1  | 84    | 94  | 0  | 45.0  | 35 | V | GYRFDENGKKV            | R | -1.6  | 9.62  |               |
| 1276 | Cg1672    | 1 | 1609.7889 | -4.6  | 82    | 94  | 0  | 41.9  | 36 | A | GFQWGLERDYQVL          | C | -0.5  | 4.08  |               |
| 1319 | Cg2535    | 1 | 1989.9167 | 3.6   | 100   | 117 | 0  | 64.5  | 35 | A | DAIDPPTLDIEDYNGNKT     | N | -1.1  | 3.36  |               |
| 1345 | Cg3367    | 1 | 1282.7245 | 3.3   | 267   | 278 | 0  | 39.1  | 34 | L | RIIIDAGGQDII           | S | 0.7   | 3.88  |               |
| 1346 | Cg3353    | 1 | 909.5396  | 6.9   | 375   | 383 | 0  | 28.4  | 28 | G | RIGAVVAPQ              | L | 0.7   | 11.04 |               |
| 1413 | Cg1694    | 1 | 1066.6247 | 26.0  | 13    | 22  | 0  | 36.0  | 29 | P | RPLALSPSRA             | G | -0.3  | 12.4  |               |
| 1414 | Cg1568    | 1 | 915.5099  | 7.5   | 106   | 113 | 0  | 39.7  | 36 | L | LLAMLLDQ               | K | 1.5   | 3.1   |               |
| 1426 | Cg0412    | 1 | 862.48    | 16.3  | 332   | 339 | 0  | 32.6  | 32 | W | PIYGSLT                | S | 0.9   | 5.92  |               |
| 1433 | Cg3139    | 1 | 1488.8525 | -4.7  | 45    | 58  | 0  | 48.1  | 33 | A | GRLPKNIGDIPRPG         | R | -0.9  | 11.32 |               |
| 1436 | Cg1810    | 1 | 1654.9083 | -1.3  | 126   | 139 | 0  | 52.8  | 36 | I | FLAPPSWEVLVERL         | T | 0.6   | 4.26  |               |
| 1481 | Cg1085    | 1 | 1004.4141 | 1.2   | 8     | 14  | 0  | 35.0  | 30 | V | NHWFWEWS               | T | -1.4  | 5.12  |               |
| 1483 | Cg0600    | 1 | 1459.7055 | -6.0  | 62    | 74  | 0  | 40.2  | 36 | A | NAENNFGLDPRTL          | V | -1.0  | 4.08  |               |
| 1506 | Cg1751    | 1 | 862.5164  | -22.4 | 90    | 97  | 0  | 36.5  | 32 | V | IFLGLSTI               | V | 2.2   | 6.02  |               |
| 1525 | Cg0561    | 1 | 1160.6441 | -2.1  | 98    | 108 | 0  | 56.9  | 35 | V | DFLAGLGVEKI            | L | 0.8   | 4.08  |               |
| 1526 | Cg0524    | 1 | 1417.703  | 2.5   | 118   | 128 | 0  | 37.4  | 37 | S | RFPFGNLYEYI            | L | -0.2  | 6.82  |               |

| hit  | accession | z | mass      | ppm  | start | end | mc | score | id | - | sequence         | + | gravy | pl   | modification |
|------|-----------|---|-----------|------|-------|-----|----|-------|----|---|------------------|---|-------|------|--------------|
| 1529 | Cg2737    | 1 | 1837.925  | 2.0  | 86    | 100 | 0  | 45.5  | 37 | A | LQWPDILDEFIEHLA  | R | 0.1   | 3.58 |              |
| 1543 | Cg1259    | 1 | 1875.9155 | -6.7 | 32    | 46  | 0  | 37.2  | 37 | Q | IFNPDQWAERYPLEV  | G | -0.7  | 3.82 |              |
| 1559 | Cg0652    | 1 | 1856.9116 | -6.8 | 38    | 54  | 0  | 41.1  | 36 | T | GISPDLRTDNLTDQIA | A | -0.7  | 3.5  |              |
| 1582 | Cg2773    | 1 | 1811.8802 | 3.8  | 128   | 143 | 0  | 41.1  | 36 | A | NADTIVDRFLNSPDHV | K | -0.4  | 4.16 |              |
| 1698 | Cg0966    | 1 | 1206.6033 | 4.2  | 38    | 47  | 0  | 38.6  | 36 | I | RFDLNEGFPL       | L | -0.4  | 4.08 |              |
| 1748 | Cg2735    | 1 | 1612.8896 | 1.2  | 79    | 91  | 0  | 45.7  | 35 | A | NDLKEIQRLLSER    | - | -1.2  | 7.14 |              |

END OF LIST III

| hit                                                                                 | accession   | z | mass      | ppm   | start | end | mc | score | id | - | sequence    | + | gravy | pl    | modification             |
|-------------------------------------------------------------------------------------|-------------|---|-----------|-------|-------|-----|----|-------|----|---|-------------|---|-------|-------|--------------------------|
| <b>IV. Purple membrane; elastase digest, nLC-MALDI MS/MS; no search specificity</b> |             |   |           |       |       |     |    |       |    |   |             |   |       |       |                          |
| 1                                                                                   | P02945 BACR | 1 | 713.4799  | 27.2  | 234   | 239 | 0  | 28.4  | 18 | G | LILLRS      | R | 1.8   | 11.04 |                          |
| 1                                                                                   | P02945 BACR | 1 | 731.4582  | -4.6  | 231   | 237 | 0  | 57.7  | 26 | V | GFGLILL     | R | 2.6   | 6.02  |                          |
| 1                                                                                   | P02945 BACR | 1 | 741.4061  | -24.8 | 54    | 59  | 0  | 40.5  | 32 | K | KFYAIT      | T | 0.5   | 9.72  |                          |
| 1                                                                                   | P02945 BACR | 1 | 762.4024  | 19.3  | 240   | 246 | 0  | 50.5  | 32 | S | RAIFGEA     | E | 0.4   | 6.98  |                          |
| 1                                                                                   | P02945 BACR | 1 | 781.4738  | -18.2 | 38    | 43  | 0  | 30.0  | 28 | T | LYFLVK      | G | 1.6   | 9.72  |                          |
| 1                                                                                   | P02945 BACR | 1 | 799.4916  | 6.8   | 187   | 193 | 0  | 38.5  | 30 | V | LRNVTVV     | L | 1.1   | 11.04 |                          |
| 1                                                                                   | P02945 BACR | 1 | 829.4182  | -6.0  | 112   | 119 | 0  | 54.7  | 35 | A | LLVDADQG    | T | 0.3   | 2.92  |                          |
| 1                                                                                   | P02945 BACR | 1 | 849.4344  | 2.1   | 239   | 246 | 0  | 41.5  | 34 | R | SRAIFGEA    | E | 0.2   | 6.98  |                          |
| 1                                                                                   | P02945 BACR | 1 | 866.5477  | 3.7   | 104   | 111 | 0  | 68.0  | 22 | T | PLLLDLA     | L | 2.0   | 3.1   |                          |
| 1                                                                                   | P02945 BACR | 1 | 876.4745  | -14.6 | 99    | 105 | 0  | 39.0  | 33 | D | WLFTTPL     | L | 0.9   | 6.02  |                          |
| 1                                                                                   | P02945 BACR | 1 | 887.4786  | -25.8 | 124   | 132 | 0  | 60.2  | 36 | A | LVGADGIMI   | G | 1.8   | 3.1   |                          |
| 1                                                                                   | P02945 BACR | 1 | 887.5593  | 4.4   | 231   | 238 | 0  | 62.2  | 23 | V | GFGLILLR    | S | 1.7   | 11.04 |                          |
| 1                                                                                   | P02945 BACR | 1 | 914.4174  | -16.7 | 96    | 102 | 0  | 33.9  | 31 | R | YADWLFT     | T | 0.3   | 3.1   |                          |
| 1                                                                                   | P02945 BACR | 1 | 917.4276  | 0.1   | 174   | 181 | 0  | 37.9  | 35 | A | ESMRPEVA    | S | -0.8  | 4.26  |                          |
| 1                                                                                   | P02945 BACR | 1 | 930.4811  | -6.2  | 201   | 209 | 0  | 68.7  | 36 | V | VWLGISEGA   | G | 0.9   | 3.3   |                          |
| 1                                                                                   | P02945 BACR | 1 | 957.4556  | 9.9   | 83    | 91  | 0  | 73.4  | 34 | V | PFGGEQNPI   | Y | -0.8  | 3.3   |                          |
| 1                                                                                   | P02945 BACR | 1 | 958.6215  | -6.1  | 229   | 237 | 0  | 44.1  | 18 | A | KVGFGLILL   | R | 2.0   | 10.1  |                          |
| 1                                                                                   | P02945 BACR | 1 | 967.5954  | -5.5  | 103   | 111 | 0  | 64.7  | 27 | T | TPLLLDLA    | L | 1.7   | 3.1   |                          |
| 1                                                                                   | P02945 BACR | 1 | 974.5913  | -6.1  | 231   | 239 | 0  | 63.7  | 27 | V | GFGLILLRS   | R | 1.4   | 11.04 |                          |
| 1                                                                                   | P02945 BACR | 1 | 986.6277  | -3.4  | 230   | 238 | 0  | 74.8  | 23 | K | VGFGILLR    | S | 2.0   | 11.04 |                          |
| 1                                                                                   | P02945 BACR | 1 | 999.4736  | -21.8 | 76    | 84  | 0  | 63.1  | 32 | L | GYGLTMVPF   | G | 0.9   | 5.92  | Oxidation (M)            |
| 1                                                                                   | P02945 BACR | 1 | 1005.5356 | -1.8  | 238   | 246 | 0  | 37.5  | 33 | L | RSRAIFGEA   | E | -0.3  | 10.88 |                          |
| 1                                                                                   | P02945 BACR | 1 | 1015.4651 | -23.0 | 96    | 103 | 0  | 39.3  | 31 | R | YADWLFTT    | P | 0.2   | 3.1   |                          |
| 1                                                                                   | P02945 BACR | 1 | 1032.44   | -18.0 | 243   | 252 | 0  | 80.2  | 30 | I | FGAEAEPEPS  | A | -0.9  | 3.02  |                          |
| 1                                                                                   | P02945 BACR | 1 | 1043.5499 | -2.0  | 112   | 121 | 0  | 72.5  | 35 | A | LLVDADQGTI  | L | 0.7   | 2.92  |                          |
| 1                                                                                   | P02945 BACR | 1 | 1055.5552 | -11.0 | 19    | 26  | 0  | 38.6  | 33 | T | GRPEWIWL    | A | -0.4  | 6.98  |                          |
| 1                                                                                   | P02945 BACR | 1 | 1062.6186 | -2.5  | 182   | 190 | 0  | 56.9  | 28 | A | STFKVLRNV   | T | 0.2   | 11.48 |                          |
| 1                                                                                   | P02945 BACR | 1 | 1069.5709 | -4.5  | 20    | 27  | 0  | 45.9  | 33 | G | RPEWIWLA    | L | -0.2  | 6.98  |                          |
| 1                                                                                   | P02945 BACR | 1 | 1070.5185 | 24.5  | 95    | 102 | 0  | 61.3  | 34 | A | RYADWLFT    | T | -0.3  | 6.7   |                          |
| 1                                                                                   | P02945 BACR | 1 | 1081.5556 | 1.9   | 16    | 24  | 0  | 61.4  | 33 | A | QITGRPEWI   | W | -0.7  | 6.98  | Gln->pyro-Glu (N-term Q) |
| 1                                                                                   | P02945 BACR | 1 | 1098.5822 | 2.5   | 16    | 24  | 0  | 50.6  | 34 | A | QITGRPEWI   | W | -0.7  | 6.98  |                          |
| 1                                                                                   | P02945 BACR | 1 | 1109.6485 | -12.8 | 34    | 43  | 0  | 84.1  | 30 | M | GLGTLYFLVK  | G | 1.2   | 9.72  |                          |
| 1                                                                                   | P02945 BACR | 1 | 1116.6907 | 4.9   | 227   | 237 | 0  | 53.5  | 22 | V | SAKVGFLILL  | R | 1.7   | 10.1  |                          |
| 1                                                                                   | P02945 BACR | 1 | 1126.5923 | 16.7  | 19    | 27  | 0  | 51.6  | 33 | T | GRPEWIWLA   | L | -0.2  | 6.98  |                          |
| 1                                                                                   | P02945 BACR | 1 | 1130.6924 | -1.5  | 231   | 240 | 0  | 44.1  | 25 | V | GFGLILLRSR  | A | 0.8   | 12.4  |                          |
| 1                                                                                   | P02945 BACR | 1 | 1133.5142 | -25.1 | 85    | 94  | 0  | 69.3  | 32 | F | GGEQNPIYWA  | R | -0.9  | 3.3   |                          |
| 1                                                                                   | P02945 BACR | 1 | 1145.524  | -25.4 | 242   | 252 | 0  | 79.0  | 32 | A | IFGAEAEPEPS | A | -0.4  | 3.02  |                          |

| hit | accession   | z | mass      | ppm   | start | end | mc | score | id | - | sequence       | + | gravy | pl    | modification             |
|-----|-------------|---|-----------|-------|-------|-----|----|-------|----|---|----------------|---|-------|-------|--------------------------|
| 1   | P02945 BACR | 1 | 1156.6029 | 6.2   | 18    | 26  | 0  | 56.0  | 34 | I | TGRPEWIWL      | A | -0.5  | 6.98  |                          |
| 1   | P02945 BACR | 1 | 1156.634  | 0.3   | 112   | 122 | 0  | 106.5 | 34 | A | LLVDADQGTL     | A | 0.9   | 2.92  |                          |
| 1   | P02945 BACR | 1 | 1159.6635 | -8.5  | 131   | 142 | 0  | 84.1  | 32 | I | MIGTGLVGLTK    | V | 1.1   | 10.1  |                          |
| 1   | P02945 BACR | 1 | 1171.5662 | -1.7  | 95    | 103 | 0  | 63.2  | 34 | A | RYADWLFTT      | P | -0.4  | 6.7   |                          |
| 1   | P02945 BACR | 1 | 1187.5645 | -21.1 | 81    | 91  | 0  | 93.9  | 33 | T | MVPFGGEQNPI    | Y | -0.1  | 3.3   |                          |
| 1   | P02945 BACR | 1 | 1203.5594 | -19.2 | 81    | 91  | 0  | 81.4  | 33 | T | MVPFGGEQNPI    | Y | -0.1  | 3.3   | Oxidation (M)            |
| 1   | P02945 BACR | 1 | 1215.7115 | -8.0  | 101   | 111 | 0  | 62.7  | 30 | L | FTTPLLLDLA     | L | 1.6   | 3.1   |                          |
| 1   | P02945 BACR | 1 | 1216.5612 | -20.9 | 241   | 252 | 0  | 114.2 | 32 | R | AIFGEAEPEPS    | A | -0.2  | 3.02  |                          |
| 1   | P02945 BACR | 1 | 1225.6019 | -17.6 | 96    | 105 | 0  | 73.1  | 33 | R | YADWLFTTPL     | L | 0.4   | 3.1   |                          |
| 1   | P02945 BACR | 1 | 1227.64   | 22.3  | 18    | 27  | 0  | 56.7  | 34 | I | TGRPEWIWLA     | L | -0.2  | 6.98  |                          |
| 1   | P02945 BACR | 1 | 1227.6711 | -24.1 | 112   | 123 | 0  | 113.1 | 34 | A | LLVDADQGTLA    | L | 1.0   | 2.92  |                          |
| 1   | P02945 BACR | 1 | 1239.6764 | -2.6  | 19    | 28  | 0  | 37.1  | 32 | T | GRPEWIWLAL     | G | 0.2   | 6.98  |                          |
| 1   | P02945 BACR | 1 | 1242.5822 | -3.0  | 92    | 100 | 0  | 36.3  | 33 | I | YWARYADWL      | F | -0.6  | 6.64  |                          |
| 1   | P02945 BACR | 1 | 1253.6292 | -0.8  | 48    | 58  | 0  | 66.4  | 34 | V | SDPDAKKFYAI    | T | -0.7  | 6.8   |                          |
| 1   | P02945 BACR | 1 | 1274.7711 | 3.0   | 183   | 193 | 0  | 61.6  | 24 | S | TFKVLNRNVTVV   | L | 0.9   | 11.48 |                          |
| 1   | P02945 BACR | 1 | 1280.6513 | 3.6   | 14    | 24  | 0  | 72.7  | 33 | S | QAQITGRPEWI    | W | -0.7  | 6.98  | Gln->pyro-Glu (N-term Q) |
| 1   | P02945 BACR | 1 | 1289.6153 | -0.4  | 85    | 95  | 0  | 87.9  | 35 | F | GGEQNPIYWAR    | Y | -1.2  | 6.88  |                          |
| 1   | P02945 BACR | 1 | 1296.6979 | -7.1  | 19    | 29  | 0  | 43.9  | 33 | T | GRPEWIWLALG    | T | 0.2   | 6.98  |                          |
| 1   | P02945 BACR | 1 | 1296.7152 | -14.7 | 31    | 42  | 0  | 35.0  | 33 | T | ALMGLGTLYFLV   | K | 1.9   | 5.92  |                          |
| 1   | P02945 BACR | 1 | 1306.5982 | -4.2  | 83    | 93  | 0  | 47.0  | 34 | V | PFGGEQNPIYW    | A | -0.9  | 3.3   |                          |
| 1   | P02945 BACR | 1 | 1314.8136 | -2.6  | 231   | 242 | 0  | 70.3  | 24 | V | GFGLILLRSRAI   | F | 1.2   | 12.4  |                          |
| 1   | P02945 BACR | 1 | 1354.6769 | 5.9   | 48    | 59  | 0  | 75.7  | 34 | V | SDPDAKKFYAIT   | T | -0.7  | 6.8   |                          |
| 1   | P02945 BACR | 1 | 1361.8031 | 1.8   | 182   | 193 | 0  | 76.5  | 27 | A | STFKVLNRNVTVV  | L | 0.8   | 11.48 |                          |
| 1   | P02945 BACR | 1 | 1372.6623 | 5.1   | 240   | 252 | 0  | 109.7 | 35 | S | RAIFGEAEPEPS   | A | -0.5  | 3.96  |                          |
| 1   | P02945 BACR | 1 | 1377.6353 | 5.2   | 83    | 94  | 0  | 93.1  | 35 | V | PFGGEQNPIYWA   | R | -0.6  | 3.3   |                          |
| 1   | P02945 BACR | 1 | 1380.719  | -3.1  | 16    | 26  | 0  | 71.8  | 34 | A | QITGRPEWIWL    | A | -0.3  | 6.98  | Gln->pyro-Glu (N-term Q) |
| 1   | P02945 BACR | 1 | 1381.703  | 16.1  | 95    | 105 | 0  | 74.5  | 33 | A | RYADWLFTTPL    | L | -0.1  | 6.7   |                          |
| 1   | P02945 BACR | 1 | 1397.7456 | -0.4  | 18    | 29  | 0  | 55.3  | 34 | I | TGRPEWIWLALG   | T | 0.1   | 6.98  |                          |
| 1   | P02945 BACR | 1 | 1409.7919 | -15.3 | 201   | 214 | 0  | 111.2 | 32 | V | VWLIGSEGAGIVPL | N | 1.3   | 3.3   |                          |
| 1   | P02945 BACR | 1 | 1424.8101 | -3.3  | 31    | 43  | 0  | 43.6  | 31 | T | ALMGLGTLYFLVK  | G | 1.5   | 9.72  |                          |
| 1   | P02945 BACR | 1 | 1443.6994 | 0.1   | 240   | 253 | 0  | 83.6  | 35 | S | RAIFGEAEPEPSA  | G | -0.4  | 3.96  |                          |
| 1   | P02945 BACR | 1 | 1451.7561 | 1.0   | 16    | 27  | 0  | 88.0  | 34 | A | QITGRPEWIWLA   | L | -0.1  | 6.98  | Gln->pyro-Glu (N-term Q) |
| 1   | P02945 BACR | 1 | 1459.6943 | 1.3   | 239   | 252 | 0  | 126.7 | 35 | R | SRAIFGEAEPEPS  | A | -0.5  | 3.96  |                          |
| 1   | P02945 BACR | 1 | 1468.7827 | 11.0  | 16    | 27  | 0  | 61.8  | 33 | A | QITGRPEWIWLA   | L | -0.1  | 6.98  |                          |
| 1   | P02945 BACR | 1 | 1469.7952 | -13.4 | 34    | 47  | 0  | 95.7  | 34 | M | GLGTLYFLVKGMGV | S | 1.2   | 9.72  | Oxidation (M)            |
| 1   | P02945 BACR | 1 | 1490.6983 | 2.3   | 92    | 102 | 0  | 53.0  | 35 | I | YWARYADWLFT    | T | -0.3  | 6.64  |                          |
| 1   | P02945 BACR | 1 | 1498.7932 | 0.3   | 18    | 30  | 0  | 89.2  | 34 | I | TGRPEWIWLALGT  | A | 0.0   | 6.98  |                          |
| 1   | P02945 BACR | 1 | 1510.7668 | -0.5  | 46    | 59  | 0  | 99.5  | 34 | M | GVSDPDAKKFYAIT | T | -0.3  | 6.8   |                          |
| 1   | P02945 BACR | 1 | 1514.8748 | 0.3   | 99    | 111 | 0  | 48.1  | 30 | D | WLFTTPLLLDLA   | L | 1.5   | 3.1   |                          |
| 1   | P02945 BACR | 1 | 1523.7157 | 9.3   | 85    | 97  | 0  | 42.6  | 35 | F | GGEQNPIYWARYA  | D | -1.0  | 6.82  |                          |



| hit | accession   | z | mass      | ppm   | start | end | mc | score | id | - | sequence               | + | gravy | pl    | modification             |
|-----|-------------|---|-----------|-------|-------|-----|----|-------|----|---|------------------------|---|-------|-------|--------------------------|
| 1   | P02945 BACR | 1 | 1530.7314 | -0.5  | 239   | 253 | 0  | 74.9  | 35 | R | SRAIFGEAEAPEPSA        | G | -0.4  | 3.96  |                          |
| 1   | P02945 BACR | 1 | 1533.7365 | 2.9   | 83    | 95  | 0  | 122.7 | 35 | V | PFGGEQNPIYWAR          | Y | -0.9  | 6.88  |                          |
| 1   | P02945 BACR | 1 | 1540.7596 | -4.7  | 45    | 58  | 0  | 61.1  | 35 | G | MGVSDPDAKKFYAI         | T | -0.1  | 6.8   |                          |
| 1   | P02945 BACR | 1 | 1572.8545 | -7.2  | 126   | 142 | 0  | 38.0  | 34 | V | GADGIMIGTGLVGALTK      | V | 0.9   | 6.76  |                          |
| 1   | P02945 BACR | 1 | 1579.8147 | 0.2   | 14    | 26  | 0  | 81.9  | 34 | S | QAQITGRPEWIWL          | A | -0.4  | 6.98  | Gln->pyro-Glu (N-term Q) |
| 1   | P02945 BACR | 1 | 1597.781  | 1.3   | 44    | 58  | 0  | 49.2  | 35 | K | GMGVSDPDAKKFYAI        | T | -0.2  | 6.8   |                          |
| 1   | P02945 BACR | 1 | 1607.7442 | 3.4   | 81    | 94  | 0  | 64.3  | 35 | T | MVPFGEQNPIYWA          | R | -0.1  | 3.3   |                          |
| 1   | P02945 BACR | 1 | 1607.8712 | 4.1   | 95    | 107 | 0  | 77.8  | 32 | A | RYADWLFTTPLL           | L | 0.5   | 6.7   |                          |
| 1   | P02945 BACR | 1 | 1615.7954 | 1.2   | 238   | 252 | 0  | 108.0 | 35 | L | RSRAIFGEAEAPEPS        | A | -0.8  | 4.56  |                          |
| 1   | P02945 BACR | 1 | 1629.9018 | 4.5   | 98    | 111 | 0  | 64.6  | 32 | A | DWLFTTPLLDDLA          | L | 1.2   | 2.92  |                          |
| 1   | P02945 BACR | 1 | 1641.8072 | -6.3  | 45    | 59  | 0  | 95.7  | 35 | G | MGVSDPDAKKFYAIT        | T | -0.2  | 6.8   |                          |
| 1   | P02945 BACR | 1 | 1650.8518 | 10.8  | 14    | 27  | 0  | 106.1 | 34 | S | QAQITGRPEWIWLA         | L | -0.2  | 6.98  | Gln->pyro-Glu (N-term Q) |
| 1   | P02945 BACR | 1 | 1671.923  | -12.1 | 126   | 143 | 0  | 91.6  | 34 | V | GADGIMIGTGLVGALTKV     | Y | 1.1   | 6.76  |                          |
| 1   | P02945 BACR | 1 | 1678.8025 | -3.5  | 76    | 91  | 0  | 123.4 | 35 | L | GYGLTMVFPFGEQNPI       | Y | 0.0   | 3.3   |                          |
| 1   | P02945 BACR | 1 | 1686.8325 | -4.8  | 238   | 253 | 0  | 82.3  | 35 | L | RSRAIFGEAEAPEPSA       | G | -0.6  | 4.56  |                          |
| 1   | P02945 BACR | 1 | 1694.7974 | -7.2  | 76    | 91  | 0  | 115.0 | 34 | L | GYGLTMVFPFGEQNPI       | Y | 0.0   | 3.3   | Oxidation (M)            |
| 1   | P02945 BACR | 1 | 1698.8287 | -10.5 | 44    | 59  | 0  | 60.3  | 35 | K | GMGVSDPDAKKFYAIT       | T | -0.2  | 6.8   |                          |
| 1   | P02945 BACR | 1 | 1718.9832 | 0.8   | 231   | 246 | 0  | 57.5  | 29 | V | GFGLLLRSRAIFGEA        | E | 0.9   | 10.88 |                          |
| 1   | P02945 BACR | 1 | 1720.9552 | -1.7  | 95    | 108 | 0  | 101.0 | 32 | A | RYADWLFTTPLL           | D | 0.7   | 6.7   |                          |
| 1   | P02945 BACR | 1 | 1722.9093 | 8.1   | 16    | 30  | 0  | 98.0  | 33 | A | QITGRPEWIWLALGT        | A | 0.1   | 6.98  | Gln->pyro-Glu (N-term Q) |
| 1   | P02945 BACR | 1 | 1739.9359 | 3.7   | 16    | 30  | 0  | 70.5  | 34 | A | QITGRPEWIWLALGT        | A | 0.1   | 6.98  |                          |
| 1   | P02945 BACR | 1 | 1743.8064 | -2.3  | 240   | 257 | 0  | 54.0  | 34 | S | RAIFGEAEAPEPSAGDGA     | A | -0.4  | 3.68  |                          |
| 1   | P02945 BACR | 1 | 1763.8454 | 2.8   | 81    | 95  | 0  | 102.9 | 35 | T | MVPFGEQNPIYWAR         | Y | -0.4  | 6.88  |                          |
| 1   | P02945 BACR | 1 | 1767.8369 | 1.1   | 83    | 97  | 0  | 79.9  | 35 | V | PFGGEQNPIYWARYA        | D | -0.8  | 6.82  |                          |
| 1   | P02945 BACR | 1 | 1779.8403 | 2.3   | 81    | 95  | 0  | 59.9  | 35 | T | MVPFGEQNPIYWAR         | Y | -0.4  | 6.88  | Oxidation (M)            |
| 1   | P02945 BACR | 1 | 1785.007  | -4.6  | 124   | 142 | 0  | 161.0 | 32 | A | LVGADGIMIGTGLVGALTKV   | V | 1.2   | 6.76  |                          |
| 1   | P02945 BACR | 1 | 1801.8828 | 1.1   | 92    | 105 | 0  | 76.1  | 36 | I | YWARYADWLFTTPL         | L | -0.1  | 6.64  |                          |
| 1   | P02945 BACR | 1 | 1820.9574 | -22.7 | 14    | 29  | 0  | 49.8  | 35 | S | QAQITGRPEWIWLALG       | T | 0.0   | 6.98  | Gln->pyro-Glu (N-term Q) |
| 1   | P02945 BACR | 1 | 1826.9237 | 12.0  | 43    | 59  | 0  | 39.8  | 35 | V | KGMGVSDPDAKKFYAIT      | T | -0.4  | 9.56  |                          |
| 1   | P02945 BACR | 1 | 1835.9669 | -4.5  | 48    | 64  | 0  | 95.0  | 34 | V | SDPDAKKFYAITTLVPA      | I | 0.0   | 6.8   |                          |
| 1   | P02945 BACR | 1 | 1841.9635 | -11.6 | 236   | 252 | 0  | 64.1  | 35 | I | LLRSRAIFGEAEAPEPS      | A | -0.3  | 4.56  |                          |
| 1   | P02945 BACR | 1 | 1864.0022 | 14.8  | 96    | 111 | 0  | 81.3  | 32 | R | YADWLFTTPLLDDLA        | L | 1.1   | 2.92  |                          |
| 1   | P02945 BACR | 1 | 1884.0754 | 0.5   | 124   | 143 | 0  | 110.6 | 30 | A | LVGADGIMIGTGLVGALTKV   | Y | 1.4   | 6.76  |                          |
| 1   | P02945 BACR | 1 | 1922.005  | -2.2  | 14    | 30  | 0  | 101.8 | 34 | S | QAQITGRPEWIWLALGT      | A | 0.0   | 6.98  | Gln->pyro-Glu (N-term Q) |
| 1   | P02945 BACR | 1 | 1955.0476 | -3.5  | 235   | 252 | 0  | 58.1  | 34 | L | ILLRSRAIFGEAEAPEPS     | A | 0.0   | 4.56  |                          |
| 1   | P02945 BACR | 1 | 2020.1033 | -2.5  | 95    | 111 | 0  | 127.6 | 33 | A | RYADWLFTTPLLDDLA       | L | 0.7   | 3.88  |                          |
| 1   | P02945 BACR | 1 | 2073.9603 | -0.5  | 240   | 261 | 0  | 57.1  | 35 | S | RAIFGEAEAPEPSAGDGAATS  | D | -0.2  | 3.68  |                          |
| 1   | P02945 BACR | 1 | 2160.9923 | -4.1  | 239   | 261 | 0  | 48.2  | 34 | R | SRAIFGEAEAPEPSAGDGAATS | D | -0.3  | 3.68  |                          |
| 1   | P02945 BACR | 1 | 2210.1484 | -3.7  | 8     | 27  | 0  | 44.2  | 35 | T | AVEGVSQAQITGRPEWIWLA   | L | 0.1   | 4.26  |                          |
| 1   | P02945 BACR | 1 | 2329.243  | -4.9  | 231   | 252 | 0  | 119.5 | 35 | V | GFGLLLRSRAIFGEAEAPEPS  | A | 0.3   | 4.56  |                          |

| hit | accession   | z | mass      | ppm   | start | end | mc | score | id | - | sequence                | + | gravy | pl    | modification             |
|-----|-------------|---|-----------|-------|-------|-----|----|-------|----|---|-------------------------|---|-------|-------|--------------------------|
| 1   | P02945 BACR | 1 | 2382.2327 | 7.4   | 31    | 53  | 0  | 62.1  | 35 | T | ALMGLGTLYFLVKGMGVSDPDAK | K | 0.6   | 6.8   |                          |
| 1   | P02945 BACR | 1 | 2440.2831 | -0.2  | 92    | 111 | 0  | 75.3  | 35 | I | YWARYADWLFITPLLLDLA     | L | 0.6   | 3.88  |                          |
| 1   | P02945 BACR | 1 | 2497.2066 | 4.0   | 85    | 105 | 0  | 37.9  | 36 | F | GGEQNPIYWARYADWLFITPL   | L | -0.5  | 4.08  |                          |
| 2   | P00772 ELA1 | 1 | 789.4133  | -5.8  | 156   | 162 | 0  | 45.1  | 35 | I | TGWGLTR                 | T | -0.5  | 11.04 |                          |
| 2   | P00772 ELA1 | 1 | 800.3851  | 9.2   | 54    | 61  | 0  | 46.1  | 33 | A | HTCGGTLI                | R | 0.7   | 7.16  |                          |
| 2   | P00772 ELA1 | 1 | 882.5287  | 0.6   | 138   | 146 | 0  | 30.3  | 29 | L | GVLPRAGTI               | L | 0.7   | 11.04 |                          |
| 2   | P00772 ELA1 | 1 | 890.461   | 15.9  | 156   | 163 | 0  | 49.8  | 33 | I | TGWGLTRT                | N | -0.6  | 11.04 |                          |
| 2   | P00772 ELA1 | 1 | 909.5396  | -9.1  | 136   | 144 | 0  | 42.3  | 27 | V | QLGVLPRAG               | T | 0.4   | 11.04 |                          |
| 2   | P00772 ELA1 | 1 | 913.4446  | 2.0   | 104   | 110 | 0  | 37.0  | 32 | I | VVHPYWN                 | T | -0.3  | 7.76  |                          |
| 2   | P00772 ELA1 | 1 | 933.4491  | 0.3   | 62    | 68  | 0  | 40.3  | 35 | I | RQNWVMT                 | A | -1.0  | 11.04 |                          |
| 2   | P00772 ELA1 | 1 | 943.4512  | -7.2  | 223   | 231 | 0  | 49.9  | 33 | V | NGQYAVHGV               | T | -0.2  | 7.76  |                          |
| 2   | P00772 ELA1 | 1 | 1004.4862 | -2.5  | 62    | 69  | 0  | 45.1  | 35 | I | RQNWVMTA                | A | -0.7  | 11.04 |                          |
| 2   | P00772 ELA1 | 1 | 1008.608  | -5.3  | 135   | 144 | 0  | 35.4  | 25 | Y | VQLGVLPRAG              | T | 0.7   | 11.04 |                          |
| 2   | P00772 ELA1 | 1 | 1009.6284 | -7.9  | 139   | 148 | 0  | 31.2  | 26 | G | VLPRAGTILA              | N | 1.3   | 11.04 |                          |
| 2   | P00772 ELA1 | 1 | 1013.4818 | -5.7  | 187   | 195 | 0  | 38.9  | 33 | S | SSYWGSTVK               | N | -0.6  | 9.72  |                          |
| 2   | P00772 ELA1 | 1 | 1014.4923 | 7.2   | 104   | 111 | 0  | 55.5  | 34 | I | VVHPYWNT                | D | -0.4  | 7.76  |                          |
| 2   | P00772 ELA1 | 1 | 1043.6128 | -7.7  | 134   | 142 | 0  | 32.1  | 31 | S | YVQLGVLPR               | A | 0.5   | 9.84  |                          |
| 2   | P00772 ELA1 | 1 | 1066.6499 | 0.0   | 138   | 148 | 0  | 54.4  | 26 | L | GVLPRAGTILA             | N | 1.1   | 11.04 |                          |
| 2   | P00772 ELA1 | 1 | 1097.5254 | 3.6   | 34    | 42  | 0  | 71.2  | 34 | A | QRNSWPSQI               | S | -1.6  | 11.04 | Gln->pyro-Glu (N-term Q) |
| 2   | P00772 ELA1 | 1 | 1114.5519 | 10.2  | 34    | 42  | 0  | 55.5  | 35 | A | QRNSWPSQI               | S | -1.6  | 11.04 |                          |
| 2   | P00772 ELA1 | 1 | 1123.6713 | -5.1  | 136   | 146 | 0  | 39.4  | 28 | V | QLGVLPRAGTI             | L | 0.6   | 11.04 |                          |
| 2   | P00772 ELA1 | 1 | 1130.6448 | -3.4  | 133   | 142 | 0  | 82.6  | 31 | N | SYVQLGVLPR              | A | 0.4   | 9.84  |                          |
| 2   | P00772 ELA1 | 1 | 1171.6713 | -6.4  | 134   | 144 | 0  | 53.1  | 32 | S | YVQLGVLPRAG             | T | 0.6   | 9.84  |                          |
| 2   | P00772 ELA1 | 1 | 1214.5568 | -8.9  | 187   | 197 | 0  | 66.1  | 33 | S | SSYWGSTVKNS             | M | -0.9  | 9.72  |                          |
| 2   | P00772 ELA1 | 1 | 1240.5836 | -0.2  | 43    | 53  | 0  | 63.8  | 34 | I | SLQYRSGSSWA             | H | -0.7  | 9.84  |                          |
| 2   | P00772 ELA1 | 1 | 1244.5462 | 6.2   | 105   | 114 | 0  | 72.6  | 33 | V | VHPYWNTDDV              | A | -1.0  | 3.88  |                          |
| 2   | P00772 ELA1 | 1 | 1258.7034 | 3.5   | 133   | 144 | 0  | 98.1  | 32 | N | SYVQLGVLPRAG            | T | 0.4   | 9.84  |                          |
| 2   | P00772 ELA1 | 1 | 1262.6659 | -15.8 | 254   | 264 | 0  | 41.0  | 34 | S | AYISWINNVIA             | S | 1.0   | 5.92  |                          |
| 2   | P00772 ELA1 | 1 | 1315.5833 | 10.9  | 105   | 115 | 0  | 62.6  | 34 | V | VHPYWNTDDVA             | A | -0.7  | 3.88  |                          |
| 2   | P00772 ELA1 | 1 | 1321.6813 | -8.2  | 239   | 250 | 0  | 42.9  | 34 | L | GCVNTRKPTVFT            | R | -0.2  | 10.1  |                          |
| 2   | P00772 ELA1 | 1 | 1343.6146 | -2.2  | 104   | 114 | 0  | 75.6  | 33 | I | VVHPYWNTDDV             | A | -0.5  | 3.88  |                          |
| 2   | P00772 ELA1 | 1 | 1385.8031 | -2.6  | 134   | 146 | 0  | 51.3  | 30 | S | YVQLGVLPRAGTI           | L | 0.8   | 9.84  |                          |
| 2   | P00772 ELA1 | 1 | 1386.6204 | 4.4   | 105   | 116 | 0  | 96.9  | 33 | V | VHPYWNTDDVAA            | G | -0.5  | 3.88  |                          |
| 2   | P00772 ELA1 | 1 | 1414.6517 | 1.6   | 104   | 115 | 0  | 81.2  | 34 | I | VVHPYWNTDDVA            | A | -0.3  | 3.88  |                          |
| 2   | P00772 ELA1 | 1 | 1427.7481 | -3.9  | 162   | 174 | 0  | 56.8  | 35 | T | RTNGQLAQLQQA            | Y | -1.0  | 11.04 |                          |
| 2   | P00772 ELA1 | 1 | 1443.6419 | 4.8   | 105   | 117 | 0  | 81.7  | 33 | V | VHPYWNTDDVAAG           | Y | -0.5  | 3.88  |                          |
| 2   | P00772 ELA1 | 1 | 1445.7449 | -5.5  | 57    | 69  | 0  | 36.2  | 35 | C | GGTLIRQNWVMTA           | A | 0.1   | 11.04 |                          |
| 2   | P00772 ELA1 | 1 | 1456.6987 | -6.9  | 103   | 114 | 0  | 53.1  | 34 | K | IVVHPYWNTDDV            | A | -0.1  | 3.88  |                          |
| 2   | P00772 ELA1 | 1 | 1458.8195 | 0.9   | 130   | 142 | 0  | 119.6 | 31 | V | TLNSYVQLGVLPR           | A | 0.3   | 9.84  |                          |
| 2   | P00772 ELA1 | 1 | 1472.8351 | 0.3   | 133   | 146 | 0  | 60.0  | 31 | N | SYVQLGVLPRAGTI          | L | 0.7   | 9.84  |                          |

| hit | accession       | z | mass      | ppm   | start | end | mc | score | id | - | sequence                  | + | gravy | pl    | modification |
|-----|-----------------|---|-----------|-------|-------|-----|----|-------|----|---|---------------------------|---|-------|-------|--------------|
| 2   | P00772 ELA1     | 1 | 1485.6889 | -1.8  | 104   | 116 | 0  | 89.6  | 34 | I | VVHPYWNTDDVA              | G | -0.2  | 3.88  |              |
| 2   | P00772 ELA1     | 1 | 1486.7165 | 1.3   | 27    | 40  | 0  | 66.5  | 35 | R | VVGGTEAQRNSWPS            | Q | -0.7  | 6.98  |              |
| 2   | P00772 ELA1     | 1 | 1529.7223 | -0.3  | 29    | 42  | 0  | 71.0  | 35 | V | GGTEAQRNSWPSQI            | S | -1.3  | 6.98  |              |
| 2   | P00772 ELA1     | 1 | 1542.7103 | 6.3   | 104   | 117 | 0  | 103.0 | 34 | I | VVHPYWNTDDVAAG            | Y | -0.2  | 3.88  |              |
| 2   | P00772 ELA1     | 1 | 1586.878  | 2.0   | 130   | 144 | 0  | 127.6 | 32 | V | TLNSYVQLGVLPRAG           | T | 0.3   | 9.84  |              |
| 2   | P00772 ELA1     | 1 | 1656.9563 | -1.0  | 133   | 148 | 0  | 53.3  | 30 | N | SYVQLGVLPRAGTILA          | N | 0.9   | 9.84  |              |
| 2   | P00772 ELA1     | 1 | 1698.9013 | 3.9   | 159   | 174 | 0  | 122.2 | 34 | W | GLTRTRNGQLAQLQQA          | Y | -0.6  | 11.04 |              |
| 2   | P00772 ELA1     | 1 | 1705.7737 | -2.6  | 104   | 118 | 0  | 91.8  | 34 | I | VVHPYWNTDDVAAGY           | D | -0.2  | 3.88  |              |
| 2   | P00772 ELA1     | 1 | 1712.8522 | -17.2 | 101   | 114 | 0  | 92.1  | 35 | V | QKIVVHPYWNTDDV            | A | -0.6  | 5.1   |              |
| 2   | P00772 ELA1     | 1 | 1715.8955 | 0.2   | 156   | 171 | 0  | 67.9  | 35 | I | TGWGLTRTRNGQLAQL          | Q | -0.4  | 11.04 |              |
| 2   | P00772 ELA1     | 1 | 1716.7339 | 1.3   | 83    | 97  | 0  | 121.7 | 31 | V | VGEHNLNQNNDGTEQY          | V | -1.7  | 3.82  |              |
| 2   | P00772 ELA1     | 1 | 1727.8591 | -0.1  | 27    | 42  | 0  | 99.4  | 36 | R | VVGGTEAQRNSWPSQI          | S | -0.6  | 6.98  |              |
| 2   | P00772 ELA1     | 1 | 1770.9992 | 0.3   | 132   | 148 | 0  | 37.3  | 31 | L | NSYVQLGVLPRAGTILA         | N | 0.7   | 9.84  |              |
| 2   | P00772 ELA1     | 1 | 1772.9785 | -1.7  | 127   | 142 | 0  | 44.5  | 32 | A | QSVTLNSYVQLGVLPR          | A | 0.2   | 9.84  |              |
| 2   | P00772 ELA1     | 1 | 1801.0098 | -0.6  | 130   | 146 | 0  | 127.3 | 31 | V | TLNSYVQLGVLPRAGTI         | L | 0.5   | 9.84  |              |
| 2   | P00772 ELA1     | 1 | 1815.8024 | -2.5  | 83    | 98  | 0  | 130.9 | 32 | V | VGEHNLNQNNDGTEQYV         | G | -1.4  | 3.82  |              |
| 2   | P00772 ELA1     | 1 | 1815.8024 | 5.0   | 82    | 97  | 0  | 102.5 | 33 | V | VVGEHNLNQNNDGTEQY         | V | -1.4  | 3.82  |              |
| 2   | P00772 ELA1     | 1 | 1901.0371 | 0.0   | 127   | 144 | 0  | 55.1  | 33 | A | QSVTLNSYVQLGVLPRAG        | T | 0.3   | 9.84  |              |
| 2   | P00772 ELA1     | 1 | 1905.8533 | -0.6  | 105   | 121 | 0  | 119.4 | 34 | V | VHPYWNTDDVAAGYDIA         | L | -0.3  | 3.6   |              |
| 2   | P00772 ELA1     | 1 | 1914.8708 | 1.0   | 82    | 98  | 0  | 132.9 | 34 | V | VGEHNLNQNNDGTEQYV         | G | -1.0  | 3.82  |              |
| 2   | P00772 ELA1     | 1 | 1933.8847 | 9.8   | 104   | 120 | 0  | 65.5  | 35 | I | VVHPYWNTDDVAAGYDI         | A | -0.2  | 3.6   |              |
| 2   | P00772 ELA1     | 1 | 1971.8923 | 2.7   | 83    | 100 | 0  | 147.5 | 34 | V | VGEHNLNQNNDGTEQYVGV       | Q | -1.0  | 3.82  |              |
| 2   | P00772 ELA1     | 1 | 1985.131  | -3.7  | 130   | 148 | 0  | 109.7 | 30 | V | TLNSYVQLGVLPRAGTILA       | N | 0.8   | 9.84  |              |
| 2   | P00772 ELA1     | 1 | 2004.9218 | -0.4  | 104   | 121 | 0  | 144.5 | 35 | I | VVHPYWNTDDVAAGYDIA        | L | -0.1  | 3.6   |              |
| 2   | P00772 ELA1     | 1 | 2013.9392 | -3.2  | 81    | 98  | 0  | 125.2 | 35 | R | VVGEHNLNQNNDGTEQYV        | G | -0.7  | 3.82  |              |
| 2   | P00772 ELA1     | 1 | 2043.0498 | 3.2   | 156   | 174 | 0  | 103.5 | 35 | I | TGWGLTRTRNGQLAQLQQA       | Y | -0.6  | 11.04 |              |
| 2   | P00772 ELA1     | 1 | 2070.9607 | -2.5  | 82    | 100 | 0  | 154.5 | 34 | V | VVGEHNLNQNNDGTEQYVGV      | Q | -0.7  | 3.82  |              |
| 2   | P00772 ELA1     | 1 | 2099.9508 | -2.6  | 83    | 101 | 0  | 154.4 | 34 | V | VGEHNLNQNNDGTEQYVGVQ      | K | -1.1  | 3.82  |              |
| 2   | P00772 ELA1     | 1 | 2118.0058 | 1.8   | 103   | 121 | 0  | 103.9 | 36 | K | IVVHPYWNTDDVAAGYDIA       | L | 0.2   | 3.6   |              |
| 2   | P00772 ELA1     | 1 | 2199.0193 | -1.2  | 82    | 101 | 0  | 142.3 | 35 | V | VVGEHNLNQNNDGTEQYVGVQ     | K | -0.9  | 3.82  |              |
| 2   | P00772 ELA1     | 1 | 2231.0899 | -4.3  | 104   | 123 | 0  | 137.8 | 36 | I | VVHPYWNTDDVAAGYDIALL      | R | 0.3   | 3.6   |              |
| 2   | P00772 ELA1     | 1 | 2341.1299 | -5.7  | 83    | 103 | 0  | 96.7  | 36 | V | VGEHNLNQNNDGTEQYVGVQKI    | V | -1.0  | 4.42  |              |
| 2   | P00772 ELA1     | 1 | 2374.1594 | -0.3  | 101   | 121 | 0  | 130.5 | 36 | V | QKIVVHPYWNTDDVAAGYDIA     | L | -0.2  | 4.16  |              |
| 2   | P00772 ELA1     | 1 | 2440.1983 | 4.2   | 82    | 103 | 0  | 110.4 | 36 | V | VVGEHNLNQNNDGTEQYVGVQKI   | V | -0.8  | 4.42  |              |
| 2   | P00772 ELA1     | 1 | 2885.4712 | 8.9   | 104   | 129 | 0  | 66.9  | 36 | I | VVHPYWNTDDVAAGYDIALLRLAQS | T | 0.3   | 4.16  |              |
| 3   | Q9HMMW9 Q9HMMW9 | 1 | 978.5287  | 8.2   | 636   | 643 | 0  | 55.1  | 31 | A | FHLQPPQL                  | F | -0.4  | 7.84  |              |
| 3   | Q9HMMW9 Q9HMMW9 | 1 | 1125.5971 | 3.1   | 636   | 644 | 0  | 55.3  | 32 | A | FHLQPPQLF                 | S | 0.0   | 7.84  |              |
| 3   | Q9HMMW9 Q9HMMW9 | 1 | 1166.6084 | -23.3 | 616   | 624 | 0  | 48.3  | 34 | A | YVINREQFV                 | S | -0.1  | 6.88  |              |
| 3   | Q9HMMW9 Q9HMMW9 | 1 | 1212.6292 | 3.9   | 636   | 645 | 0  | 70.1  | 34 | A | FHLQPPQLFS                | D | -0.1  | 7.84  |              |
| 3   | Q9HMMW9 Q9HMMW9 | 1 | 1215.6149 | -2.3  | 182   | 191 | 0  | 36.3  | 35 | L | GWVADYPRPR                | N | -1.2  | 9.84  |              |

| hit | accession       | z | mass      | ppm   | start | end | mc | score | id | - | sequence           | + | gravy | pl    | modification |
|-----|-----------------|---|-----------|-------|-------|-----|----|-------|----|---|--------------------|---|-------|-------|--------------|
| 3   | Q9HMMW9 Q9HMMW9 | 1 | 1253.6404 | -2.8  | 616   | 625 | 0  | 49.8  | 34 | A | YVINREQFVS         | D | -0.1  | 6.88  |              |
| 3   | Q9HMMW9 Q9HMMW9 | 1 | 1269.6176 | 5.3   | 614   | 623 | 0  | 44.8  | 34 | A | MAYVINREQF         | V | -0.1  | 6.88  |              |
| 3   | Q9HMMW9 Q9HMMW9 | 1 | 1286.5455 | -7.5  | 92    | 101 | 0  | 56.4  | 29 | T | DYQPDFDKYP         | Y | -2.1  | 3.6   |              |
| 3   | Q9HMMW9 Q9HMMW9 | 1 | 1296.5809 | -9.9  | 133   | 142 | 0  | 75.6  | 32 | L | QYQSPTWKEM         | A | -1.8  | 6.86  |              |
| 3   | Q9HMMW9 Q9HMMW9 | 1 | 1329.6578 | -1.5  | 182   | 192 | 0  | 36.7  | 35 | L | GWVADYPRPRN        | F | -1.4  | 9.84  |              |
| 3   | Q9HMMW9 Q9HMMW9 | 1 | 1367.618  | -8.8  | 133   | 143 | 0  | 37.8  | 33 | L | QYQSPTWKEMA        | N | -1.5  | 6.86  |              |
| 3   | Q9HMMW9 Q9HMMW9 | 1 | 1368.686  | -1.2  | 614   | 624 | 0  | 41.0  | 34 | A | MAYVINREQFV        | S | 0.3   | 6.88  |              |
| 3   | Q9HMMW9 Q9HMMW9 | 1 | 1391.6034 | -10.1 | 93    | 103 | 0  | 45.1  | 31 | D | YQPDFDKYPYG        | I | -1.7  | 3.88  |              |
| 3   | Q9HMMW9 Q9HMMW9 | 1 | 1411.6884 | 2.0   | 275   | 285 | 0  | 48.1  | 34 | H | NLAQSFWDRL         | D | -0.5  | 6.7   |              |
| 3   | Q9HMMW9 Q9HMMW9 | 1 | 1441.7049 | -3.6  | 166   | 178 | 0  | 93.1  | 35 | S | SLLETTKQGEHEA      | F | -1.1  | 4.54  |              |
| 3   | Q9HMMW9 Q9HMMW9 | 1 | 1455.718  | -2.1  | 614   | 625 | 0  | 39.1  | 35 | A | MAYVINREQFVS       | D | 0.2   | 6.88  |              |
| 3   | Q9HMMW9 Q9HMMW9 | 1 | 1467.7358 | -1.0  | 616   | 627 | 0  | 38.3  | 34 | A | YVINREQFVSDV       | F | -0.1  | 4.08  |              |
| 3   | Q9HMMW9 Q9HMMW9 | 1 | 1476.7262 | 2.2   | 182   | 193 | 0  | 39.7  | 35 | L | GWVADYPRPRNF       | M | -1.1  | 9.84  |              |
| 3   | Q9HMMW9 Q9HMMW9 | 1 | 1506.6303 | -3.8  | 92    | 103 | 0  | 81.4  | 30 | T | DYQPDFDKYPYG       | I | -1.9  | 3.6   |              |
| 3   | Q9HMMW9 Q9HMMW9 | 1 | 1619.7144 | -5.0  | 92    | 104 | 0  | 85.3  | 32 | T | DYQPDFDKYPYGI      | D | -1.4  | 3.6   |              |
| 3   | Q9HMMW9 Q9HMMW9 | 1 | 1638.7678 | -1.3  | 119   | 132 | 0  | 54.3  | 34 | E | AGYGPDNKYELNWL     | Q | -1.0  | 4.08  |              |
| 3   | Q9HMMW9 Q9HMMW9 | 1 | 1660.6893 | 7.2   | 88    | 101 | 0  | 49.3  | 30 | T | GESTDYQPDFDKYP     | Y | -1.9  | 3.5   |              |
| 3   | Q9HMMW9 Q9HMMW9 | 1 | 1695.7926 | -3.9  | 133   | 146 | 0  | 89.6  | 34 | L | QYQSPTWKEMANTI     | R | -1.1  | 6.86  |              |
| 3   | Q9HMMW9 Q9HMMW9 | 1 | 1728.7301 | -3.1  | 116   | 130 | 0  | 78.6  | 30 | V | MEEAGYGPDNKYELN    | W | -1.5  | 3.68  |              |
| 3   | Q9HMMW9 Q9HMMW9 | 1 | 1734.7413 | -4.3  | 92    | 105 | 0  | 85.6  | 31 | T | DYQPDFDKYPYID      | E | -1.5  | 3.42  |              |
| 3   | Q9HMMW9 Q9HMMW9 | 1 | 1736.8958 | 0.9   | 619   | 633 | 0  | 89.0  | 34 | I | NREQFVSDVFKGRGV    | G | -0.7  | 10.08 |              |
| 3   | Q9HMMW9 Q9HMMW9 | 1 | 1767.8104 | 5.8   | 118   | 132 | 0  | 46.3  | 34 | E | EAGYGPDNKYELNWL    | Q | -1.2  | 3.82  |              |
| 3   | Q9HMMW9 Q9HMMW9 | 1 | 1802.905  | -1.4  | 166   | 181 | 0  | 124.4 | 36 | S | SLLETTKQGEHEAFTL   | G | -0.5  | 4.54  |              |
| 3   | Q9HMMW9 Q9HMMW9 | 1 | 1822.8712 | 0.3   | 129   | 142 | 0  | 45.1  | 35 | E | LNWLQYQSPTWKEM     | A | -1.0  | 6.86  |              |
| 3   | Q9HMMW9 Q9HMMW9 | 1 | 1823.7526 | -1.9  | 88    | 102 | 0  | 78.7  | 29 | T | GESTDYQPDFDKYPY    | G | -1.8  | 3.5   |              |
| 3   | Q9HMMW9 Q9HMMW9 | 1 | 1849.8047 | 4.7   | 93    | 107 | 0  | 97.6  | 33 | D | YQPDFDKYPYIDET     | K | -1.5  | 3.5   |              |
| 3   | Q9HMMW9 Q9HMMW9 | 1 | 1857.9335 | -0.5  | 595   | 610 | 0  | 105.2 | 36 | I | DTYYVGFNMTKVPKPV   | R | -0.3  | 9.46  |              |
| 3   | Q9HMMW9 Q9HMMW9 | 1 | 1864.9544 | 0.1   | 619   | 635 | 0  | 92.1  | 35 | I | NREQFVSDVFKGRGVGA  | F | -0.5  | 10.08 |              |
| 3   | Q9HMMW9 Q9HMMW9 | 1 | 1880.7741 | -0.5  | 88    | 103 | 0  | 78.6  | 29 | T | GESTDYQPDFDKYPYGI  | I | -1.8  | 3.5   |              |
| 3   | Q9HMMW9 Q9HMMW9 | 1 | 1893.9083 | -20.8 | 129   | 143 | 0  | 80.1  | 34 | E | LNWLQYQSPTWKEMA    | N | -0.9  | 6.86  |              |
| 3   | Q9HMMW9 Q9HMMW9 | 1 | 1954.8908 | 2.5   | 339   | 355 | 0  | 73.1  | 34 | M | DLFDAPTNYENGRTEIT  | N | -1.1  | 3.58  |              |
| 3   | Q9HMMW9 Q9HMMW9 | 1 | 1964.8316 | -1.5  | 92    | 107 | 0  | 120.4 | 30 | T | DYQPDFDKYPYIDET    | K | -1.6  | 3.36  |              |
| 3   | Q9HMMW9 Q9HMMW9 | 1 | 1971.0176 | -5.5  | 594   | 610 | 0  | 53.8  | 36 | T | IDTYVGFNMTKVPKPV   | R | 0.0   | 9.46  |              |
| 3   | Q9HMMW9 Q9HMMW9 | 1 | 1987.9421 | -0.4  | 149   | 165 | 0  | 40.2  | 35 | A | RLEQAHIMTINDANFS   | S | -0.5  | 4.42  |              |
| 3   | Q9HMMW9 Q9HMMW9 | 1 | 1993.8582 | 1.5   | 88    | 104 | 0  | 90.4  | 32 | T | GESTDYQPDFDKYPYGI  | D | -1.4  | 3.5   |              |
| 3   | Q9HMMW9 Q9HMMW9 | 1 | 2072.0653 | -8.3  | 593   | 610 | 0  | 36.7  | 36 | S | TIDTYVGFNMTKVPKPV  | R | -0.1  | 9.46  |              |
| 3   | Q9HMMW9 Q9HMMW9 | 1 | 2092.9266 | -27.5 | 92    | 108 | 0  | 45.8  | 29 | T | DYQPDFDKYPYIDETK   | V | -1.7  | 3.76  |              |
| 3   | Q9HMMW9 Q9HMMW9 | 1 | 2108.8851 | -1.4  | 88    | 105 | 0  | 83.2  | 30 | T | GESTDYQPDFDKYPYID  | E | -1.5  | 3.36  |              |
| 3   | Q9HMMW9 Q9HMMW9 | 1 | 2112.1116 | 2.3   | 616   | 633 | 0  | 95.5  | 35 | A | YVINREQFVSDVFKGRGV | G | -0.2  | 9.72  |              |
| 3   | Q9HMMW9 Q9HMMW9 | 1 | 2159.0973 | 0.5   | 592   | 610 | 0  | 39.7  | 36 | V | STIDTYVGFNMTKVPKPV | R | -0.1  | 9.46  |              |

| hit | accession       | z | mass      | ppm   | start | end | mc | score | id | - | sequence                       | + | gravy | pl   | modification             |
|-----|-----------------|---|-----------|-------|-------|-----|----|-------|----|---|--------------------------------|---|-------|------|--------------------------|
| 3   | Q9HMMW9 Q9HMMW9 | 1 | 2222.083  | -1.6  | 129   | 146 | 0  | 72.7  | 36 | E | LNWLQYQSPTWKEMANTI             | R | -0.7  | 6.86 |                          |
| 3   | Q9HMMW9 Q9HMMW9 | 1 | 2240.1702 | -3.3  | 616   | 635 | 0  | 56.5  | 35 | A | YVINREQFVSDVFKGRGVGA           | F | -0.1  | 9.72 |                          |
| 3   | Q9HMMW9 Q9HMMW9 | 1 | 2263.0321 | 3.4   | 92    | 110 | 0  | 35.0  | 35 | T | DYQPPDFDKYPYGIDETKVA           | E | -1.2  | 3.76 |                          |
| 3   | Q9HMMW9 Q9HMMW9 | 1 | 2314.1892 | -0.5  | 614   | 633 | 0  | 97.4  | 36 | A | MAYVINREQFVSDVFKGRGV           | G | 0.0   | 9.72 |                          |
| 3   | Q9HMMW9 Q9HMMW9 | 1 | 2338.9754 | 7.7   | 88    | 107 | 0  | 98.9  | 30 | T | GESTDYQPPDFDKYPYGIDET          | K | -1.6  | 3.32 |                          |
| 3   | Q9HMMW9 Q9HMMW9 | 1 | 2442.2478 | 1.7   | 614   | 635 | 0  | 52.0  | 36 | A | MAYVINREQFVSDVFKGRGVGA         | F | 0.1   | 9.72 |                          |
| 3   | Q9HMMW9 Q9HMMW9 | 1 | 2467.0703 | -20.7 | 88    | 108 | 0  | 40.7  | 28 | T | GESTDYQPPDFDKYPYGIDETK         | V | -1.7  | 3.68 |                          |
| 3   | Q9HMMW9 Q9HMMW9 | 1 | 2637.1759 | 0.4   | 88    | 110 | 0  | 42.8  | 33 | T | GESTDYQPPDFDKYPYGIDETKVA       | E | -1.3  | 3.68 |                          |
| 3   | Q9HMMW9 Q9HMMW9 | 1 | 2766.2184 | 8.0   | 88    | 111 | 0  | 49.2  | 34 | T | GESTDYQPPDFDKYPYGIDETKVAE      | A | -1.4  | 3.62 |                          |
| 4   | Q9HR99 Q9HR99   | 1 | 1419.6154 | -3.6  | 122   | 134 | 0  | 65.3  | 32 | V | DAGETLEHTFETA                  | G | -0.7  | 3.68 |                          |
| 4   | Q9HR99 Q9HR99   | 1 | 1473.6195 | -5.4  | 106   | 119 | 0  | 75.8  | 30 | A | SGFGTMDKDGNGQFA                | V | -0.8  | 3.88 |                          |
| 4   | Q9HR99 Q9HR99   | 1 | 1491.7246 | -7.0  | 57    | 70  | 0  | 84.6  | 35 | A | VAPDGGGFKFEPSEL                | T | -0.3  | 3.82 |                          |
| 4   | Q9HR99 Q9HR99   | 1 | 1562.7617 | -5.1  | 56    | 70  | 0  | 78.5  | 35 | I | AVAPDGGGFKFEPSEL               | T | -0.1  | 3.82 |                          |
| 4   | Q9HR99 Q9HR99   | 1 | 1651.7664 | 7.1   | 91    | 105 | 0  | 55.8  | 35 | S | AWPDMHDKISIPDGA                | S | -0.6  | 4.16 |                          |
| 4   | Q9HR99 Q9HR99   | 1 | 1671.7563 | -1.6  | 106   | 121 | 0  | 133.1 | 33 | A | SGFGTMDKDGNGQFAVV              | D | -0.2  | 3.88 |                          |
| 4   | Q9HR99 Q9HR99   | 1 | 1687.7512 | -4.7  | 106   | 121 | 0  | 54.8  | 32 | A | SGFGTMDKDGNGQFAVV              | D | -0.2  | 3.88 | Oxidation (M)            |
| 4   | Q9HR99 Q9HR99   | 1 | 1691.8407 | 0.9   | 57    | 72  | 0  | 105.2 | 35 | A | VAPDGGGFKFEPSELTV              | S | 0.0   | 3.82 |                          |
| 4   | Q9HR99 Q9HR99   | 1 | 1762.8778 | -3.5  | 56    | 72  | 0  | 119.1 | 36 | I | AVAPDGGGFKFEPSELTV             | S | 0.1   | 3.82 |                          |
| 4   | Q9HR99 Q9HR99   | 1 | 1869.7905 | -0.4  | 122   | 138 | 0  | 149.6 | 31 | V | DAGETLEHTFETAGEYTY             | Y | -0.9  | 3.58 |                          |
| 4   | Q9HR99 Q9HR99   | 1 | 2016.8953 | 3.4   | 123   | 140 | 0  | 37.0  | 34 | D | AGETLEHTFETAGEYTYV             | C | -0.5  | 3.78 |                          |
| 4   | Q9HR99 Q9HR99   | 1 | 2064.9753 | 2.8   | 48    | 68  | 0  | 47.1  | 35 | A | SQSGGNTIAVAPDGGGFKFEPSEL       | E | -0.4  | 4.08 |                          |
| 4   | Q9HR99 Q9HR99   | 1 | 2092.0113 | 4.0   | 50    | 70  | 0  | 44.7  | 36 | Q | SGGNTIAVAPDGGGFKFEPSEL         | T | -0.2  | 3.82 |                          |
| 4   | Q9HR99 Q9HR99   | 1 | 2131.9222 | 7.6   | 122   | 140 | 0  | 152.5 | 33 | V | DAGETLEHTFETAGEYTYV            | C | -0.7  | 3.58 |                          |
| 4   | Q9HR99 Q9HR99   | 1 | 2176.0007 | 11.1  | 86    | 105 | 0  | 118.8 | 35 | S | SHNVSAPDMHDKISIPDGA            | S | -0.6  | 5.02 |                          |
| 4   | Q9HR99 Q9HR99   | 1 | 2205.0954 | 5.3   | 51    | 72  | 0  | 45.8  | 36 | S | GGNTIAVAPDGGGFKFEPSELTV        | S | 0.0   | 3.82 |                          |
| 4   | Q9HR99 Q9HR99   | 1 | 2212.0107 | 4.0   | 100   | 121 | 0  | 56.4  | 35 | I | SIPDGASGFGTMDKDGNGQFAVV        | D | -0.1  | 3.6  |                          |
| 4   | Q9HR99 Q9HR99   | 1 | 2292.1274 | 0.6   | 50    | 72  | 0  | 86.5  | 36 | Q | SGGNTIAVAPDGGGFKFEPSELTV       | S | 0.0   | 3.82 |                          |
| 4   | Q9HR99 Q9HR99   | 1 | 2307.1019 | 5.5   | 48    | 70  | 0  | 104.2 | 36 | A | SQSGGNTIAVAPDGGGFKFEPSEL       | T | -0.3  | 3.82 |                          |
| 4   | Q9HR99 Q9HR99   | 1 | 2507.218  | 5.4   | 48    | 72  | 0  | 128.2 | 36 | A | SQSGGNTIAVAPDGGGFKFEPSELTV     | S | -0.2  | 3.82 |                          |
| 4   | Q9HR99 Q9HR99   | 1 | 2594.25   | 9.1   | 48    | 73  | 0  | 66.2  | 36 | A | SQSGGNTIAVAPDGGGFKFEPSELTVS    | V | -0.2  | 3.82 |                          |
| 4   | Q9HR99 Q9HR99   | 1 | 3073.3611 | 0.4   | 106   | 134 | 0  | 91.2  | 33 | A | SGFGTMDKDGNGQFAVVDAGETLEHTFETA | G | -0.4  | 3.74 |                          |
| 5   | Q9HN93 Q9HN93   | 1 | 1239.5156 | -6.1  | 118   | 128 | 0  | 77.7  | 30 | A | DWGGHDPIENT                    | G | -1.5  | 3.7  |                          |
| 5   | Q9HN93 Q9HN93   | 1 | 1326.5517 | -4.5  | 38    | 49  | 0  | 62.2  | 29 | A | QAYDGFWSGDAK                   | G | -1.0  | 3.88 | Gln->pyro-Glu (N-term Q) |
| 5   | Q9HN93 Q9HN93   | 1 | 1332.6099 | -2.1  | 98    | 108 | 0  | 38.4  | 34 | V | SFEWVSNTHNI                    | L | -0.5  | 5.12 |                          |
| 5   | Q9HN93 Q9HN93   | 1 | 1398.6528 | -0.8  | 206   | 217 | 0  | 39.5  | 34 | V | SYRRTPAPDSS                    | G | -1.6  | 9.58 |                          |
| 5   | Q9HN93 Q9HN93   | 1 | 1440.5946 | -5.5  | 38    | 51  | 0  | 95.0  | 28 | A | QAYDGFWSGDAKGG                 | A | -0.9  | 3.88 | Gln->pyro-Glu (N-term Q) |
| 5   | Q9HN93 Q9HN93   | 1 | 1564.7481 | -6.4  | 103   | 117 | 0  | 51.3  | 35 | V | SNTHNILIDAPDGA                 | D | -0.5  | 3.88 |                          |
| 5   | Q9HN93 Q9HN93   | 1 | 1610.7002 | 1.7   | 38    | 53  | 0  | 96.9  | 32 | A | QAYDGFWSGDAKGGAV               | G | -0.4  | 3.88 | Gln->pyro-Glu (N-term Q) |
| 5   | Q9HN93 Q9HN93   | 1 | 1667.7216 | 0.1   | 38    | 54  | 0  | 106.3 | 32 | A | QAYDGFWSGDAKGGAVG              | N | -0.4  | 3.88 | Gln->pyro-Glu (N-term Q) |
| 5   | Q9HN93 Q9HN93   | 1 | 1711.7479 | -2.3  | 129   | 143 | 0  | 73.1  | 32 | T | GFTHTHTFDTEGVYT                | Y | -0.6  | 5.04 |                          |

| hit | accession     | z | mass      | ppm   | start | end | mc | score | id | - | sequence                           | + | gravy | pl   | modification             |
|-----|---------------|---|-----------|-------|-------|-----|----|-------|----|---|------------------------------------|---|-------|------|--------------------------|
| 5   | Q9HN93 Q9HN93 | 1 | 1755.7853 | -2.0  | 37    | 54  | 0  | 90.3  | 33 | A | AQAYDGFWSGDAKGGAVG                 | N | -0.3  | 3.88 |                          |
| 5   | Q9HN93 Q9HN93 | 1 | 1761.737  | 6.6   | 240   | 254 | 0  | 54.0  | 31 | A | FEPDTELGHDEYDPV                    | G | -1.3  | 3.38 |                          |
| 5   | Q9HN93 Q9HN93 | 1 | 1832.7741 | -2.8  | 239   | 254 | 0  | 68.9  | 30 | D | AFEPDTELGHDEYDPV                   | G | -1.1  | 3.38 |                          |
| 5   | Q9HN93 Q9HN93 | 1 | 1990.8432 | -25.8 | 239   | 256 | 0  | 56.6  | 26 | D | AFEPDTELGHDEYDPVGT                 | L | -1.0  | 3.38 |                          |
| 5   | Q9HN93 Q9HN93 | 1 | 2018.8382 | 11.0  | 237   | 254 | 0  | 39.6  | 31 | E | ADAFEPDTELGHDEYDPV                 | G | -1.1  | 3.28 |                          |
| 5   | Q9HN93 Q9HN93 | 1 | 2213.0389 | 4.4   | 98    | 117 | 0  | 147.7 | 35 | V | SFEWVSNTHNILIDAQPDGA               | D | -0.3  | 3.7  |                          |
| 5   | Q9HN93 Q9HN93 | 1 | 2418.0401 | 5.8   | 38    | 61  | 0  | 176.6 | 32 | A | QAYDGFWSGDAKGGAVGNYDGTTV           | D | -0.5  | 3.6  | Gln->pyro-Glu (N-term Q) |
| 5   | Q9HN93 Q9HN93 | 1 | 2583.1726 | 4.9   | 62    | 87  | 0  | 52.4  | 34 | V | DRTGTDEVITDVGVDANGGTYGFGPA         | A | -0.4  | 3.36 |                          |
| 5   | Q9HN93 Q9HN93 | 1 | 2790.2158 | 2.1   | 38    | 64  | 0  | 199.1 | 32 | A | QAYDGFWSGDAKGGAVGNYDGTTVDRT        | G | -0.8  | 3.88 | Gln->pyro-Glu (N-term Q) |
| 5   | Q9HN93 Q9HN93 | 1 | 2804.2049 | -5.6  | 210   | 236 | 0  | 39.1  | 30 | R | RTPAPDSSGAFDYEPGGDTDDQPAIPE        | A | -1.2  | 3.22 |                          |
| 5   | Q9HN93 Q9HN93 | 1 | 3291.4229 | 0.9   | 38    | 69  | 0  | 83.0  | 31 | A | QAYDGFWSGDAKGGAVGNYDGTTVDRTGTDEV   | T | -0.8  | 3.64 | Gln->pyro-Glu (N-term Q) |
| 5   | Q9HN93 Q9HN93 | 1 | 3444.5018 | -2.8  | 206   | 237 | 0  | 41.2  | 31 | V | SYRRTPAPDSSGAFDYEPGGDTDDQPAIPEA    | D | -1.2  | 3.58 |                          |
| 5   | Q9HN93 Q9HN93 | 1 | 3505.5547 | 15.3  | 38    | 71  | 0  | 63.8  | 35 | A | QAYDGFWSGDAKGGAVGNYDGTTVDRTGTDEVTI | D | -0.6  | 3.64 | Gln->pyro-Glu (N-term Q) |
| 6   | Q9HMI3 Q9HMI3 | 1 | 1172.619  | -5.7  | 556   | 566 | 0  | 53.9  | 35 | V | GGPFLDRVELA                        | - | 0.2   | 4.08 |                          |
| 6   | Q9HMI3 Q9HMI3 | 1 | 1319.6986 | -2.2  | 181   | 191 | 0  | 36.9  | 34 | T | QQYAPFLRNLA                        | I | -0.4  | 9.84 |                          |
| 6   | Q9HMI3 Q9HMI3 | 1 | 1358.7194 | -4.9  | 554   | 566 | 0  | 64.0  | 35 | T | SVGGPFLDRVELA                      | - | 0.5   | 4.08 |                          |
| 6   | Q9HMI3 Q9HMI3 | 1 | 1475.7157 | -0.9  | 390   | 402 | 0  | 61.1  | 35 | A | TFSNPRGYNPNPI                      | Q | -1.2  | 9.84 |                          |
| 6   | Q9HMI3 Q9HMI3 | 1 | 1554.7103 | 1.4   | 237   | 250 | 0  | 45.1  | 34 | V | RLTAFDDYWGAPS                      | V | -0.5  | 3.88 |                          |
| 6   | Q9HMI3 Q9HMI3 | 1 | 1577.8202 | -2.9  | 178   | 190 | 0  | 59.0  | 35 | I | DLTQQYAPFLRNLA                     | A | -0.5  | 6.7  |                          |
| 6   | Q9HMI3 Q9HMI3 | 1 | 1648.8573 | -5.1  | 178   | 191 | 0  | 50.7  | 35 | I | DLTQQYAPFLRNLA                     | I | -0.3  | 6.7  |                          |
| 6   | Q9HMI3 Q9HMI3 | 1 | 1793.8221 | 3.7   | 222   | 236 | 0  | 102.8 | 34 | T | GPFEFDQLDNETQRV                    | R | -1.2  | 3.58 |                          |
| 6   | Q9HMI3 Q9HMI3 | 1 | 1808.9309 | 17.6  | 78    | 93  | 0  | 102.9 | 34 | V | TNQIFDTLIQFKPGTS                   | G | -0.3  | 6.76 |                          |
| 6   | Q9HMI3 Q9HMI3 | 1 | 1852.8228 | 2.4   | 220   | 235 | 0  | 107.9 | 33 | V | GTGPFEFDQLDNETQR                   | V | -1.5  | 3.58 |                          |
| 6   | Q9HMI3 Q9HMI3 | 1 | 1881.8745 | 1.1   | 460   | 476 | 0  | 110.0 | 35 | V | LLHPGTDIDVDPADQNY                  | I | -0.7  | 3.42 |                          |
| 6   | Q9HMI3 Q9HMI3 | 1 | 1951.8912 | 1.1   | 220   | 236 | 0  | 140.2 | 34 | V | GTGPFEFDQLDNETQRV                  | R | -1.1  | 3.58 |                          |
| 6   | Q9HMI3 Q9HMI3 | 1 | 1994.9585 | -4.4  | 460   | 477 | 0  | 89.1  | 35 | V | LLHPGTDIDVDPADQNYI                 | A | -0.4  | 3.42 |                          |
| 6   | Q9HMI3 Q9HMI3 | 1 | 2016.929  | 0.9   | 53    | 69  | 0  | 38.7  | 35 | E | LVYSRGDHPQNYDPQQT                  | T | -1.7  | 5.1  |                          |
| 6   | Q9HMI3 Q9HMI3 | 1 | 2209.1267 | -2.9  | 78    | 97  | 0  | 94.8  | 36 | V | TNQIFDTLIQFKPGTSGELT               | S | -0.3  | 4.08 |                          |
| 6   | Q9HMI3 Q9HMI3 | 1 | 2296.1587 | -6.4  | 78    | 98  | 0  | 111.5 | 36 | V | TNQIFDTLIQFKPGTSGELTS              | G | -0.3  | 4.08 |                          |
| 6   | Q9HMI3 Q9HMI3 | 1 | 2310.1339 | 1.6   | 198   | 219 | 0  | 64.2  | 36 | I | LSRDQIESLGADAQPELGTDPV             | G | -0.5  | 3.42 |                          |
| 6   | Q9HMI3 Q9HMI3 | 1 | 2494.2551 | 2.2   | 196   | 219 | 0  | 98.1  | 36 | A | AILSARDQIESLGADAQPELGTDPV          | G | -0.2  | 3.42 |                          |
| 6   | Q9HMI3 Q9HMI3 | 1 | 2565.2922 | 2.0   | 195   | 219 | 0  | 44.2  | 36 | A | AAILSARDQIESLGADAQPELGTDPV         | G | -0.1  | 3.42 |                          |
| 6   | Q9HMI3 Q9HMI3 | 1 | 3202.4691 | 5.2   | 207   | 236 | 0  | 72.6  | 35 | L | GADAQPELGTDPVGTGPFEFDQLDNETQRV     | R | -0.9  | 3.28 |                          |
| 7   | Q48302 Q48302 | 1 | 904.5059  | -11.4 | 82    | 89  | 0  | 33.8  | 32 | V | VFVPTPF                            | - | 1.8   | 6.02 |                          |
| 7   | Q48302 Q48302 | 1 | 979.4723  | -5.6  | 40    | 49  | 0  | 47.4  | 33 | A | GYAERGIGSA                         | A | -0.3  | 6.88 |                          |
| 7   | Q48302 Q48302 | 1 | 1012.5375 | -0.3  | 18    | 27  | 0  | 45.6  | 33 | S | NMPAITPKAA                         | A | 0.1   | 10.1 |                          |
| 7   | Q48302 Q48302 | 1 | 1050.5094 | 1.8   | 39    | 49  | 0  | 50.1  | 34 | A | AGYAERGIGSA                        | A | -0.1  | 6.88 |                          |
| 7   | Q48302 Q48302 | 1 | 1099.5695 | -3.4  | 17    | 27  | 0  | 54.8  | 35 | G | SNMPAITPKAA                        | A | 0.0   | 10.1 |                          |
| 7   | Q48302 Q48302 | 1 | 1149.5778 | -2.2  | 40    | 51  | 0  | 63.8  | 34 | A | GYAERGIGSAAV                       | G | 0.2   | 6.88 |                          |
| 7   | Q48302 Q48302 | 1 | 1156.591  | -1.7  | 16    | 27  | 0  | 54.2  | 34 | T | GSNMPAITPKAA                       | A | -0.1  | 10.1 |                          |

| hit | accession     | z | mass      | ppm   | start | end | mc | score | id | - | sequence                    | + | gravy | pI    | modification             |
|-----|---------------|---|-----------|-------|-------|-----|----|-------|----|---|-----------------------------|---|-------|-------|--------------------------|
| 7   | Q48302 Q48302 | 1 | 1206.5993 | 0.7   | 40    | 52  | 0  | 38.1  | 35 | A | GYAERGIGSAAVG               | A | 0.2   | 6.88  |                          |
| 7   | Q48302 Q48302 | 1 | 1220.6149 | -4.8  | 39    | 51  | 0  | 54.4  | 34 | A | AGYAERGIGSAAV               | G | 0.4   | 6.88  |                          |
| 7   | Q48302 Q48302 | 1 | 1234.6306 | -0.8  | 36    | 48  | 0  | 60.9  | 34 | A | ALAAGYAERGIGS               | A | 0.3   | 6.88  |                          |
| 7   | Q48302 Q48302 | 1 | 1234.6306 | -2.8  | 37    | 49  | 0  | 68.2  | 35 | A | LAAGYAERGIGSA               | A | 0.3   | 6.88  |                          |
| 7   | Q48302 Q48302 | 1 | 1277.6364 | -0.9  | 40    | 53  | 0  | 103.4 | 35 | A | GYAERGIGSAAVGA              | I | 0.3   | 6.88  |                          |
| 7   | Q48302 Q48302 | 1 | 1305.6677 | 2.4   | 36    | 49  | 0  | 72.1  | 34 | A | ALAAGYAERGIGSA              | A | 0.4   | 6.88  |                          |
| 7   | Q48302 Q48302 | 1 | 1348.6735 | -0.3  | 39    | 53  | 0  | 95.6  | 35 | A | AGYAERGIGSAAVGA             | I | 0.4   | 6.88  |                          |
| 7   | Q48302 Q48302 | 1 | 1386.6813 | -1.9  | 14    | 27  | 0  | 47.5  | 35 | A | ETGSNMPAITPKAA              | A | -0.4  | 6.94  |                          |
| 7   | Q48302 Q48302 | 1 | 1457.7184 | -10.2 | 13    | 27  | 0  | 101.0 | 35 | L | AETGSNMPAITPKAA             | A | -0.2  | 6.94  |                          |
| 7   | Q48302 Q48302 | 1 | 1473.7133 | -1.8  | 13    | 27  | 0  | 38.4  | 35 | L | AETGSNMPAITPKAA             | A | -0.2  | 6.94  | Oxidation (M)            |
| 7   | Q48302 Q48302 | 1 | 1475.7732 | -4.6  | 36    | 51  | 0  | 49.2  | 35 | A | ALAAGYAERGIGSAAV            | G | 0.8   | 6.88  |                          |
| 7   | Q48302 Q48302 | 1 | 1603.8318 | 0.6   | 36    | 53  | 0  | 83.8  | 35 | A | ALAAGYAERGIGSAAVGA          | I | 0.7   | 6.88  |                          |
| 7   | Q48302 Q48302 | 1 | 1683.8865 | -3.9  | 11    | 27  | 0  | 110.4 | 35 | T | ILAETGSNMPAITPKAA           | A | 0.3   | 6.94  |                          |
| 7   | Q48302 Q48302 | 1 | 1901.037  | 3.6   | 28    | 48  | 0  | 90.6  | 33 | A | AALAVGLAALAAGYAERGIGS       | A | 1.1   | 6.88  |                          |
| 7   | Q48302 Q48302 | 1 | 1972.0741 | -2.0  | 28    | 49  | 0  | 71.7  | 33 | A | AALAVGLAALAAGYAERGIGSA      | A | 1.1   | 6.88  |                          |
| 8   | Q9HHN1 Q9HHN1 | 1 | 939.4563  | 0.3   | 195   | 201 | 0  | 47.6  | 33 | V | DLWDHVR                     | G | -1.1  | 5.1   |                          |
| 8   | Q9HHN1 Q9HHN1 | 1 | 1534.6949 | 3.6   | 421   | 434 | 0  | 95.8  | 34 | S | EPMPWNSGGVFMA               | S | 0.3   | 3.3   |                          |
| 8   | Q9HHN1 Q9HHN1 | 1 | 1571.674  | -1.9  | 395   | 407 | 0  | 37.0  | 31 | T | FRDLNDEYDLDT                | S | -1.3  | 3.36  |                          |
| 8   | Q9HHN1 Q9HHN1 | 1 | 1585.7049 | 6.9   | 9     | 21  | 0  | 53.6  | 33 | S | YEDFDPEKRPSFG               | Q | -1.7  | 4.06  |                          |
| 8   | Q9HHN1 Q9HHN1 | 1 | 1672.7369 | 13.0  | 8     | 21  | 0  | 86.5  | 34 | R | SYEDFDPEKRPSFG              | Q | -1.7  | 4.06  |                          |
| 8   | Q9HHN1 Q9HHN1 | 1 | 1803.7621 | 0.2   | 393   | 407 | 0  | 88.1  | 30 | G | MTFRDLNDEYDLDT              | S | -1.1  | 3.36  |                          |
| 8   | Q9HHN1 Q9HHN1 | 1 | 2038.9881 | -2.9  | 166   | 185 | 0  | 40.6  | 35 | A | GAILSGVYMGDKQSPSLDSTT       | L | -0.1  | 3.88  |                          |
| 8   | Q9HHN1 Q9HHN1 | 1 | 2045.9728 | 5.2   | 411   | 428 | 0  | 81.0  | 36 | S | RTLEETGTVSEPMIPWNS          | G | -0.7  | 3.96  |                          |
| 8   | Q9HHN1 Q9HHN1 | 1 | 2054.9334 | 8.8   | 5     | 21  | 0  | 94.9  | 35 | F | EPRSYEDFDPEKRPSFG           | Q | -1.9  | 4.28  |                          |
| 8   | Q9HHN1 Q9HHN1 | 1 | 2090.9103 | 8.8   | 393   | 410 | 0  | 33.4  | 33 | G | MTFRDLNDEYDLDTLSLS          | R | -0.8  | 3.36  |                          |
| 8   | Q9HHN1 Q9HHN1 | 1 | 2169.9889 | 9.9   | 389   | 407 | 0  | 49.3  | 35 | I | VIPGMTFRDLNDEYDLDT          | S | -0.5  | 3.36  |                          |
| 8   | Q9HHN1 Q9HHN1 | 1 | 2283.0729 | -4.8  | 388   | 407 | 0  | 59.9  | 35 | S | IVIPGMTFRDLNDEYDLDT         | S | -0.3  | 3.36  |                          |
| 8   | Q9HHN1 Q9HHN1 | 1 | 2336.1934 | 1.3   | 166   | 188 | 0  | 49.8  | 36 | A | GAILSGVYMGDKQSPSLDSTLLA     | S | 0.3   | 3.88  |                          |
| 8   | Q9HHN1 Q9HHN1 | 1 | 2430.1128 | 1.3   | 2     | 21  | 0  | 44.0  | 35 | M | VEFEPERSYEDFDPEKRPSFG       | Q | -1.5  | 4.12  |                          |
| 8   | Q9HHN1 Q9HHN1 | 1 | 2608.2302 | 0.7   | 411   | 434 | 0  | 152.4 | 36 | S | RTLEETGTVSEPMIPWNSGGVFMA    | S | -0.1  | 3.96  |                          |
| 8   | Q9HHN1 Q9HHN1 | 1 | 2624.2251 | 1.6   | 411   | 434 | 0  | 56.4  | 35 | S | RTLEETGTVSEPMIPWNSGGVFMA    | S | -0.1  | 3.96  | Oxidation (M)            |
| 8   | Q9HHN1 Q9HHN1 | 1 | 2895.3783 | 0.7   | 408   | 434 | 0  | 36.1  | 36 | T | SLSRTLEETGTVSEPMIPWNSGGVFMA | S | 0.0   | 3.96  |                          |
| 8   | Q9HHN1 Q9HHN1 | 1 | 2907.2943 | 2.9   | 383   | 407 | 0  | 68.0  | 34 | A | DQYMSIVIPGMTFRDLNDEYDLDT    | S | -0.5  | 3.26  |                          |
| 10  | Q9HM69 CSG    | 1 | 1133.6445 | -2.6  | 677   | 686 | 0  | 35.2  | 31 | Q | FRLVDGLTTI                  | E | 0.9   | 6.78  |                          |
| 10  | Q9HM69 CSG    | 1 | 1227.6459 | -6.9  | 764   | 773 | 0  | 34.3  | 34 | D | RQNVEIVEEL                  | E | -0.5  | 3.96  |                          |
| 10  | Q9HM69 CSG    | 1 | 1244.6765 | -3.1  | 676   | 686 | 0  | 82.9  | 34 | Q | QFRLVDGLTTI                 | E | 0.5   | 6.78  | Gln->pyro-Glu (N-term Q) |
| 10  | Q9HM69 CSG    | 1 | 1261.703  | -5.8  | 676   | 686 | 0  | 74.0  | 32 | Q | QFRLVDGLTTI                 | E | 0.5   | 6.78  |                          |
| 10  | Q9HM69 CSG    | 1 | 1308.7877 | 4.2   | 840   | 852 | 0  | 54.4  | 26 | V | AVLGAALLALRQN               | - | 1.1   | 11.04 |                          |
| 10  | Q9HM69 CSG    | 1 | 1315.6045 | -23.0 | 733   | 744 | 0  | 70.0  | 32 | W | NSDGQWSVDVPL                | S | -0.5  | 2.92  |                          |
| 10  | Q9HM69 CSG    | 1 | 1664.7529 | 2.9   | 598   | 611 | 0  | 65.0  | 34 | T | FDEEDIDISELRQ               | S | -1.0  | 3.38  |                          |

| hit | accession     | z | mass      | ppm   | start | end | mc | score | id | - | sequence                        | + | gravy | pl   | modification |
|-----|---------------|---|-----------|-------|-------|-----|----|-------|----|---|---------------------------------|---|-------|------|--------------|
| 10  | Q9HM69 CSG    | 1 | 1909.8541 | 9.4   | 598   | 614 | 0  | 43.8  | 34 | T | FDEEDIDISELRQGSAS               | A | -0.8  | 3.38 |              |
| 10  | Q9HM69 CSG    | 1 | 2093.8774 | 2.3   | 747   | 765 | 0  | 74.1  | 30 | N | VEPGNYTVEADDGDNTDRQ             | N | -1.6  | 3.32 |              |
| 10  | Q9HM69 CSG    | 1 | 2207.9203 | 0.4   | 746   | 765 | 0  | 81.8  | 29 | S | NVEPGNYTVEADDGDNTDRQ            | N | -1.7  | 3.32 |              |
| 10  | Q9HM69 CSG    | 1 | 2265.9986 | 2.5   | 751   | 770 | 0  | 57.3  | 33 | G | NYTVEADDGDNTDRQNVEIV            | E | -1.2  | 3.32 |              |
| 10  | Q9HM69 CSG    | 1 | 2294.9523 | 1.9   | 745   | 765 | 0  | 108.4 | 29 | L | SNVEPGNYTVEADDGDNTDRQ           | N | -1.7  | 3.32 |              |
| 10  | Q9HM69 CSG    | 1 | 2384.0139 | 2.4   | 591   | 611 | 0  | 92.1  | 31 | I | SVSDDTFDEEDIDISELRQG            | S | -1.1  | 3.12 |              |
| 10  | Q9HM69 CSG    | 1 | 2542.0831 | 12.0  | 591   | 613 | 0  | 73.9  | 32 | I | SVSDDTFDEEDIDISELRQGS           | S | -1.0  | 3.12 |              |
| 10  | Q9HM69 CSG    | 1 | 2629.1151 | 5.8   | 591   | 614 | 0  | 115.6 | 31 | I | SVSDDTFDEEDIDISELRQGSAS         | A | -1.0  | 3.12 |              |
| 12  | Q9HMG3 Q9HMG3 | 1 | 1037.5254 | 8.9   | 35    | 43  | 0  | 48.2  | 33 | I | AQDVLEHRA                       | S | -0.7  | 5.22 |              |
| 12  | Q9HMG3 Q9HMG3 | 1 | 1494.6515 | 0.5   | 44    | 56  | 0  | 33.1  | 32 | A | STVPETDFPEPYN                   | R | -1.2  | 2.94 |              |
| 12  | Q9HMG3 Q9HMG3 | 1 | 1650.7526 | -0.8  | 44    | 57  | 0  | 97.1  | 34 | A | STVPETDFPEPYNR                  | S | -1.4  | 3.82 |              |
| 12  | Q9HMG3 Q9HMG3 | 1 | 1737.7846 | -1.0  | 44    | 58  | 0  | 117.7 | 34 | A | STVPETDFPEPYNRS                 | I | -1.4  | 3.82 |              |
| 12  | Q9HMG3 Q9HMG3 | 1 | 2207.0131 | 1.1   | 44    | 65  | 0  | 85.0  | 35 | A | STVPETDFPEPYNRSIGGGGGA          | G | -0.7  | 3.82 |              |
| 12  | Q9HMG3 Q9HMG3 | 1 | 2264.0346 | 5.2   | 44    | 66  | 0  | 135.3 | 35 | A | STVPETDFPEPYNRSIGGGGGAG         | A | -0.7  | 3.82 |              |
| 12  | Q9HMG3 Q9HMG3 | 1 | 2335.0717 | -1.4  | 44    | 67  | 0  | 107.0 | 34 | A | STVPETDFPEPYNRSIGGGGGAGA        | V | -0.6  | 3.82 |              |
| 12  | Q9HMG3 Q9HMG3 | 1 | 2434.1401 | 4.2   | 44    | 68  | 0  | 63.2  | 36 | A | STVPETDFPEPYNRSIGGGGGAGAV       | A | -0.4  | 3.82 |              |
| 12  | Q9HMG3 Q9HMG3 | 1 | 2505.1772 | 3.0   | 44    | 69  | 0  | 107.0 | 36 | A | STVPETDFPEPYNRSIGGGGGAGAVA      | G | -0.3  | 3.82 |              |
| 12  | Q9HMG3 Q9HMG3 | 1 | 2514.1663 | -1.3  | 35    | 56  | 0  | 37.4  | 35 | I | AQDVLEHRASTVPETDFPEPYN          | R | -1.0  | 3.92 |              |
| 12  | Q9HMG3 Q9HMG3 | 1 | 2562.1987 | 4.0   | 44    | 70  | 0  | 47.1  | 36 | A | STVPETDFPEPYNRSIGGGGGAGAVAG     | G | -0.3  | 3.82 |              |
| 12  | Q9HMG3 Q9HMG3 | 1 | 2690.2573 | 1.8   | 44    | 72  | 0  | 60.5  | 36 | A | STVPETDFPEPYNRSIGGGGGAGAVAGGA   | E | -0.3  | 3.82 |              |
| 12  | Q9HMG3 Q9HMG3 | 1 | 2757.2994 | -6.9  | 35    | 58  | 0  | 46.0  | 35 | I | AQDVLEHRASTVPETDFPEPYNRS        | I | -1.1  | 4.28 |              |
| 12  | Q9HMG3 Q9HMG3 | 1 | 2906.3319 | -4.2  | 44    | 74  | 0  | 36.7  | 34 | A | STVPETDFPEPYNRSIGGGGGAGAVAGGAES | E | -0.4  | 3.68 |              |
| 13  | Q9HRQ9 Q9HRQ9 | 1 | 1164.5597 | 1.5   | 183   | 193 | 0  | 83.9  | 35 | R | SPHEMGVPIQA                     | H | -0.2  | 5.12 |              |
| 13  | Q9HRQ9 Q9HRQ9 | 1 | 1398.6681 | -6.8  | 102   | 113 | 0  | 57.9  | 34 | V | KWVWEGSTGHN                     | H | -0.8  | 7.82 |              |
| 13  | Q9HRQ9 Q9HRQ9 | 1 | 1497.7576 | -3.5  | 78    | 91  | 0  | 50.7  | 35 | T | VKVGPNQNVFDPA                   | E | -0.6  | 6.76 |              |
| 13  | Q9HRQ9 Q9HRQ9 | 1 | 1626.8002 | -1.5  | 79    | 93  | 0  | 90.2  | 35 | V | KVGPNNQNVFDPAEV                 | Y | -0.8  | 4.08 |              |
| 13  | Q9HRQ9 Q9HRQ9 | 1 | 1674.8148 | 0.5   | 175   | 191 | 0  | 100.5 | 36 | S | GGGGPVERSPHEMGVPI               | Q | -0.4  | 5.3  |              |
| 13  | Q9HRQ9 Q9HRQ9 | 1 | 1707.8118 | 4.3   | 102   | 116 | 0  | 104.8 | 35 | V | KWVWEGSTGHNHAT                  | S | -0.8  | 7.96 |              |
| 13  | Q9HRQ9 Q9HRQ9 | 1 | 1725.8686 | -0.6  | 78    | 93  | 0  | 84.3  | 35 | T | VKVGPNQNVFDPAEV                 | Y | -0.4  | 4.08 |              |
| 13  | Q9HRQ9 Q9HRQ9 | 1 | 1873.9105 | -1.0  | 175   | 193 | 0  | 88.5  | 36 | S | GGGGPVERSPHEMGVPIQA             | H | -0.5  | 5.3  |              |
| 13  | Q9HRQ9 Q9HRQ9 | 1 | 1955.0112 | 2.0   | 76    | 93  | 0  | 73.2  | 35 | T | KTVKVGPNQNVFDPAEV               | Y | -0.7  | 6.98 |              |
| 13  | Q9HRQ9 Q9HRQ9 | 1 | 2306.0716 | -13.4 | 102   | 122 | 0  | 96.1  | 34 | V | KWVWEGSTGHNHATSVPDEA            | G | -0.7  | 5.18 |              |
| 13  | Q9HRQ9 Q9HRQ9 | 1 | 2445.1812 | 8.3   | 79    | 101 | 0  | 87.2  | 36 | V | KVGPNNQNVFDPAEVVSPGDTV          | K | -0.5  | 3.7  |              |
| 13  | Q9HRQ9 Q9HRQ9 | 1 | 2544.2497 | -4.2  | 78    | 101 | 0  | 47.9  | 36 | T | VKVGPNQNVFDPAEVVSPGDTV          | K | -0.3  | 3.7  |              |
| 14  | Q9HSA8 Q9HSA8 | 1 | 927.445   | 2.6   | 59    | 66  | 0  | 41.1  | 33 | L | TVFGEYRG                        | L | -0.5  | 6.88 |              |
| 14  | Q9HSA8 Q9HSA8 | 1 | 953.4971  | 9.1   | 61    | 68  | 0  | 37.6  | 32 | V | FGEYRGLL                        | E | 0.0   | 6.88 |              |
| 14  | Q9HSA8 Q9HSA8 | 1 | 1236.6139 | 2.3   | 61    | 71  | 0  | 69.8  | 34 | V | FGEYRGLLEPG                     | I | -0.5  | 4.26 |              |
| 14  | Q9HSA8 Q9HSA8 | 1 | 1274.5965 | 0.0   | 83    | 92  | 0  | 41.6  | 35 | T | YTFDMRTQTI                      | D | -0.6  | 6.7  |              |
| 14  | Q9HSA8 Q9HSA8 | 1 | 1463.7409 | -1.3  | 61    | 73  | 0  | 70.2  | 35 | V | FGEYRGLLEPGIN                   | V | -0.3  | 4.26 |              |
| 14  | Q9HSA8 Q9HSA8 | 1 | 1672.7944 | 2.0   | 165   | 178 | 0  | 43.0  | 35 | R | IRTELDEPTDEWGI                  | R | -1.0  | 3.5  |              |



| hit | accession     | z | mass      | ppm   | start | end | mc | score | id | - | sequence                     | + | gravy | pl   | modification |
|-----|---------------|---|-----------|-------|-------|-----|----|-------|----|---|------------------------------|---|-------|------|--------------|
| 14  | Q9HSA8 Q9HSA8 | 1 | 1706.9719 | -4.3  | 66    | 81  | 0  | 46.7  | 30 | R | GLLEPGINVIPIPFVSR            | T | 0.6   | 6.98 |              |
| 14  | Q9HSA8 Q9HSA8 | 1 | 2017.0673 | 0.2   | 61    | 78  | 0  | 120.2 | 34 | V | FGEYRGLLEPGINVIPIPF          | V | 0.2   | 4.26 |              |
| 14  | Q9HSA8 Q9HSA8 | 1 | 2203.1677 | 2.0   | 61    | 80  | 0  | 119.1 | 34 | V | FGEYRGLLEPGINVIPIPFVS        | R | 0.4   | 4.26 |              |
| 14  | Q9HSA8 Q9HSA8 | 1 | 2359.2688 | 3.9   | 61    | 81  | 0  | 45.9  | 33 | V | FGEYRGLLEPGINVIPIPFVSR       | T | 0.1   | 7.04 |              |
| 15  | Q9HRS0 Q9HRS0 | 1 | 1286.6156 | -0.9  | 119   | 129 | 0  | 52.0  | 35 | V | RFVWESGGHNV                  | H | -0.5  | 7.84 |              |
| 15  | Q9HRS0 Q9HRS0 | 1 | 1327.6408 | -4.9  | 145   | 156 | 0  | 85.7  | 34 | T | DIAGPPKEYTHT                 | F | -1.2  | 5.22 |              |
| 15  | Q9HRS0 Q9HRS0 | 1 | 1475.6067 | -1.2  | 219   | 230 | 0  | 64.6  | 29 | A | YFFMKYGGDYGE                 | - | -0.7  | 4.08 |              |
| 15  | Q9HRS0 Q9HRS0 | 1 | 1478.7592 | -4.3  | 103   | 115 | 0  | 49.6  | 34 | S | NVFKPAEMYVKPG                | T | -0.4  | 9.62 |              |
| 15  | Q9HRS0 Q9HRS0 | 1 | 1595.7593 | 0.1   | 119   | 132 | 0  | 58.1  | 35 | V | RFVWESGGHNVHAT               | E | -0.6  | 8    |              |
| 15  | Q9HRS0 Q9HRS0 | 1 | 1917.8956 | -1.5  | 183   | 200 | 0  | 84.7  | 35 | V | TDSPPENKGYQTIVPDSA           | K | -1.1  | 3.7  |              |
| 15  | Q9HRS0 Q9HRS0 | 1 | 2344.1798 | 8.0   | 179   | 200 | 0  | 96.7  | 36 | G | TIIVTDSPPENKGYQTIVPDSA       | K | -0.4  | 3.7  |              |
| 15  | Q9HRS0 Q9HRS0 | 1 | 2541.166  | 1.4   | 133   | 156 | 0  | 45.0  | 35 | T | EVPGDADWGVSTDIAGPPKEYTHT     | F | -0.8  | 3.84 |              |
| 15  | Q9HRS0 Q9HRS0 | 1 | 2570.1602 | -12.0 | 145   | 167 | 0  | 70.5  | 32 | T | DIAGPPKEYTHTFDGPTGEYNYV      | C | -1.0  | 4.06 |              |
| 15  | Q9HRS0 Q9HRS0 | 1 | 2809.2845 | 3.0   | 119   | 144 | 0  | 61.0  | 35 | V | RFVWESGGHNVHATEVPGDADWGVST   | D | -0.5  | 4.52 |              |
| 16  | Q9HSS1 Q9HSS1 | 1 | 940.4866  | -2.6  | 249   | 258 | 0  | 35.7  | 32 | A | LGALEDGPV                    | S | 0.6   | 3    |              |
| 16  | Q9HSS1 Q9HSS1 | 1 | 1051.5451 | -7.0  | 153   | 162 | 0  | 48.7  | 33 | V | GFVGFGEIAR                   | G | 0.7   | 6.98 |              |
| 16  | Q9HSS1 Q9HSS1 | 1 | 1207.635  | -3.4  | 153   | 164 | 0  | 75.4  | 33 | V | GFVGFGEIARGV                 | A | 0.9   | 6.98 |              |
| 16  | Q9HSS1 Q9HSS1 | 1 | 1232.6401 | -6.0  | 210   | 220 | 0  | 42.6  | 35 | V | FAPLTEETRGL                  | V | -0.2  | 4.26 |              |
| 16  | Q9HSS1 Q9HSS1 | 1 | 1253.5829 | -12.8 | 134   | 145 | 0  | 73.9  | 33 | R | GGWAWNDAPAPL                 | R | -0.3  | 3.1  |              |
| 16  | Q9HSS1 Q9HSS1 | 1 | 1409.684  | -2.3  | 133   | 145 | 0  | 61.3  | 34 | R | RGGWAWNDAPAPL                | R | -0.6  | 6.78 |              |
| 16  | Q9HSS1 Q9HSS1 | 1 | 1593.8151 | -0.8  | 149   | 164 | 0  | 57.8  | 34 | A | DATVGFVGFGEIARGV             | A | 0.8   | 4.08 |              |
| 16  | Q9HSS1 Q9HSS1 | 1 | 1646.8152 | -2.7  | 210   | 224 | 0  | 37.1  | 35 | V | FAPLTEETRGLVDEA              | A | -0.2  | 3.68 |              |
| 16  | Q9HSS1 Q9HSS1 | 1 | 1888.0306 | 0.1   | 262   | 279 | 0  | 102.3 | 33 | A | ALDVLPTPEPPVESPLVGR          | S | 0.1   | 3.82 |              |
| 16  | Q9HSS1 Q9HSS1 | 1 | 1959.0677 | 4.3   | 261   | 279 | 0  | 87.4  | 33 | A | AALDVLPTPEPPVESPLVGR         | S | 0.2   | 3.82 |              |
| 16  | Q9HSS1 Q9HSS1 | 1 | 2736.4698 | 8.0   | 262   | 287 | 0  | 44.1  | 33 | A | ALDVLPTPEPPVESPLVGRSDVLVTPH  | C | 0.2   | 4.06 |              |
| 16  | Q9HSS1 Q9HSS1 | 1 | 2807.5069 | -0.3  | 261   | 287 | 0  | 65.3  | 34 | A | AALDVLPTPEPPVESPLVGRSDVLVTPH | C | 0.2   | 4.06 |              |
| 17  | Q9HN95 Q9HN95 | 1 | 940.5018  | 5.1   | 454   | 463 | 0  | 65.8  | 32 | V | LAPGSPGFPV                   | - | 0.6   | 6.02 |              |
| 17  | Q9HN95 Q9HN95 | 1 | 1064.5403 | -6.4  | 224   | 233 | 0  | 66.5  | 34 | R | GGSGYIGWLR                   | A | -0.1  | 9.84 |              |
| 17  | Q9HN95 Q9HN95 | 1 | 1139.5764 | -7.2  | 31    | 40  | 0  | 75.7  | 33 | T | FYPPLQAHPA                   | F | -0.3  | 7.76 |              |
| 17  | Q9HN95 Q9HN95 | 1 | 1240.6241 | 2.4   | 30    | 40  | 0  | 39.1  | 34 | Y | TFYPPLQAHPA                  | F | -0.3  | 7.76 |              |
| 17  | Q9HN95 Q9HN95 | 1 | 1296.631  | 0.9   | 69    | 79  | 0  | 39.9  | 34 | A | DNPDERIPLQT                  | F | -1.6  | 3.7  |              |
| 17  | Q9HN95 Q9HN95 | 1 | 1403.6874 | -2.0  | 29    | 40  | 0  | 42.0  | 35 | L | YTFYPPLQAHPA                 | F | -0.4  | 7.7  |              |
| 17  | Q9HN95 Q9HN95 | 1 | 1450.8224 | -0.3  | 140   | 151 | 0  | 44.5  | 30 | A | YLAWYTILPKLA                 | G | 0.8   | 9.52 |              |
| 17  | Q9HN95 Q9HN95 | 1 | 1516.7714 | -4.5  | 28    | 40  | 0  | 87.6  | 36 | V | LYTFYPPLQAHPA                | F | -0.1  | 7.7  |              |
| 17  | Q9HN95 Q9HN95 | 1 | 1729.8828 | -3.6  | 26    | 40  | 0  | 58.0  | 36 | A | NVLYTFYPPLQAHPA              | F | 0.0   | 7.7  |              |
| 17  | Q9HN95 Q9HN95 | 1 | 2062.9901 | 1.4   | 176   | 193 | 0  | 62.7  | 36 | V | GFHHQYTDPGIAEGFKFI           | A | -0.4  | 6.02 |              |
| 18  | Q9HN94 Q9HN94 | 1 | 1209.5415 | 6.2   | 18    | 27  | 0  | 51.0  | 33 | A | DNFRDPGVYQ                   | A | -1.5  | 3.88 |              |
| 18  | Q9HN94 Q9HN94 | 1 | 1516.6318 | -2.7  | 28    | 40  | 0  | 99.8  | 30 | Q | ADDDSYDVYVEAR                | Q | -1.0  | 3.36 |              |
| 18  | Q9HN94 Q9HN94 | 1 | 1791.7588 | 2.2   | 28    | 42  | 0  | 87.0  | 31 | Q | ADDDSYDVYVEARQF              | A | -0.9  | 3.36 |              |
| 18  | Q9HN94 Q9HN94 | 1 | 2161.9335 | -3.7  | 1     | 21  | 0  | 210.1 | 31 | - | MVGDDGGTVNPDNPTAADNFR        | D | -0.9  | 3.42 |              |

| hit | accession     | z | mass      | ppm   | start | end | mc | score | id | - | sequence                      | + | gravy | pl    | modification |
|-----|---------------|---|-----------|-------|-------|-----|----|-------|----|---|-------------------------------|---|-------|-------|--------------|
| 18  | Q9HN94 Q9HN94 | 1 | 2821.225  | -2.4  | 1     | 27  | 0  | 126.3 | 31 | - | MVGDDGGTVNPDNPTAADNFRDPGVYQ   | A | -0.9  | 3.3   |              |
| 19  | Q9HRL3 Q9HRL3 | 1 | 1103.5651 | -7.9  | 586   | 595 | 0  | 62.8  | 35 | A | WLLYSGPAPT                    | K | 0.2   | 5.92  |              |
| 19  | Q9HRL3 Q9HRL3 | 1 | 1311.6169 | 2.4   | 274   | 285 | 0  | 77.5  | 34 | T | WLPDAMEGPTPV                  | S | -0.2  | 3     |              |
| 19  | Q9HRL3 Q9HRL3 | 1 | 1876.9472 | -3.7  | 524   | 540 | 0  | 87.9  | 36 | T | GLHIEFLHTWLAGPEGT             | A | 0.1   | 5.12  |              |
| 19  | Q9HRL3 Q9HRL3 | 1 | 1916.9592 | -2.6  | 630   | 648 | 0  | 58.8  | 36 | L | ARGADTFDQGVIDGIVNAV           | A | 0.3   | 3.6   |              |
| 19  | Q9HRL3 Q9HRL3 | 1 | 1977.9949 | -19.5 | 523   | 540 | 0  | 105.1 | 36 | A | TGLHIEFLHTWLAGPEGT            | S | 0.1   | 5.12  |              |
| 19  | Q9HRL3 Q9HRL3 | 1 | 2106.0245 | -4.6  | 267   | 285 | 0  | 41.3  | 36 | S | AQFPLHTWLPDAMEGPTPV           | S | -0.1  | 4.06  |              |
| 20  | Q9HMF1 Q9HMF1 | 1 | 1198.5982 | -7.7  | 160   | 169 | 0  | 71.4  | 34 | V | RLEGELPEWA                    | T | -0.9  | 3.96  |              |
| 20  | Q9HMF1 Q9HMF1 | 1 | 1411.7095 | -0.6  | 158   | 169 | 0  | 70.8  | 34 | V | NVRLEGELPEWA                  | T | -0.7  | 3.96  |              |
| 20  | Q9HMF1 Q9HMF1 | 1 | 1931.984  | 0.1   | 191   | 208 | 0  | 82.6  | 36 | K | VLEYTGPGVESLSVPERT            | T | -0.2  | 3.96  |              |
| 20  | Q9HMF1 Q9HMF1 | 1 | 2193.0073 | 1.6   | 581   | 599 | 0  | 52.7  | 35 | L | NIDEETYARIEQGDDVEVV           | D | -0.8  | 3.32  |              |
| 20  | Q9HMF1 Q9HMF1 | 1 | 2948.3775 | 7.6   | 434   | 462 | 0  | 110.0 | 36 | Y | SGGYGAGTDIITPEESIDDDLIKGNIS   | S | -0.5  | 3.22  |              |
| 20  | Q9HMF1 Q9HMF1 | 1 | 3198.4728 | -1.6  | 432   | 462 | 0  | 40.8  | 35 | T | SYSGGYGAGTDIITPEESIDDDLIKGNIS | S | -0.5  | 3.22  |              |
| 21  | Q9HMT7 Q9HMT7 | 1 | 1497.6736 | -9.3  | 148   | 161 | 0  | 69.8  | 32 | S | ATDYDASGPFEGIR                | A | -0.7  | 3.7   |              |
| 21  | Q9HMT7 Q9HMT7 | 1 | 1559.6892 | 4.8   | 150   | 163 | 0  | 40.1  | 33 | T | DYDASGPFEGIRAY                | R | -0.7  | 3.7   |              |
| 21  | Q9HMT7 Q9HMT7 | 1 | 1702.7322 | -0.9  | 44    | 59  | 0  | 127.6 | 31 | V | DVDTEAYEESHAPGAI              | G | -0.7  | 3.5   |              |
| 21  | Q9HMT7 Q9HMT7 | 1 | 1731.774  | 6.4   | 148   | 163 | 0  | 67.8  | 34 | S | ATDYDASGPFEGIRAY              | R | -0.6  | 3.7   |              |
| 21  | Q9HMT7 Q9HMT7 | 1 | 2369.1751 | 4.1   | 178   | 199 | 0  | 64.7  | 36 | L | VDVRSPEEFSGEILAPPGLQET        | A | -0.4  | 3.58  |              |
| 21  | Q9HMT7 Q9HMT7 | 1 | 2564.0074 | 4.8   | 126   | 147 | 0  | 66.1  | 25 | L | DGGRDYWMDNDYPTSEPPSFS         | A | -1.7  | 3.32  |              |
| 22  | Q9HND8 VATI   | 1 | 1332.631  | -3.1  | 364   | 374 | 0  | 44.7  | 35 | I | NRPQYTEIDPT                   | V | -1.8  | 4.08  |              |
| 22  | Q9HND8 VATI   | 1 | 1445.715  | -3.9  | 363   | 374 | 0  | 52.3  | 35 | V | INRPQYTEIDPT                  | V | -1.3  | 4.08  |              |
| 22  | Q9HND8 VATI   | 1 | 1530.7678 | -4.5  | 364   | 376 | 0  | 44.1  | 36 | I | NRPQYTEIDPTVV                 | L | -0.9  | 4.08  |              |
| 22  | Q9HND8 VATI   | 1 | 1544.7835 | -0.6  | 362   | 374 | 0  | 38.4  | 35 | E | VINRPQYTEIDPT                 | V | -0.9  | 4.08  |              |
| 22  | Q9HND8 VATI   | 1 | 1673.826  | -1.1  | 361   | 374 | 0  | 73.3  | 36 | T | EVINRPQYTEIDPT                | V | -1.1  | 3.82  |              |
| 22  | Q9HND8 VATI   | 1 | 1871.9629 | -2.7  | 361   | 376 | 0  | 82.0  | 36 | T | EVINRPQYTEIDPTVV              | L | -0.4  | 3.82  |              |
| 22  | Q9HND8 VATI   | 1 | 2086.0946 | -5.8  | 359   | 376 | 0  | 48.6  | 35 | S | LTEVINRPQYTEIDPTVV            | L | -0.2  | 3.82  |              |
| 23  | Q9HRR1 Q9HRR1 | 1 | 713.4799  | 27.2  | 189   | 194 | 0  | 30.0  | 18 | P | ILIIRS                        | P | 2.0   | 11.04 |              |
| 23  | Q9HRR1 Q9HRR1 | 1 | 2366.0986 | 29.8  | 26    | 51  | 0  | 172.2 | 36 | A | GAGTAGTAVLESVTNPTGSGGGQNTY    | F | -0.3  | 3.3   |              |
| 23  | Q9HRR1 Q9HRR1 | 1 | 2719.1198 | 13.6  | 151   | 174 | 0  | 124.0 | 30 | V | NIDEFDDYDTWENDYGDAGIGKPA      | K | -1.3  | 3.16  |              |
| 24  | Q9HRR0 Q9HRR0 | 1 | 1333.6051 | 3.3   | 7     | 17  | 0  | 55.2  | 34 | S | NYGDIHRYEPA                   | S | -1.5  | 5.22  |              |
| 24  | Q9HRR0 Q9HRR0 | 1 | 1420.6371 | 0.4   | 6     | 17  | 0  | 72.0  | 33 | G | SNYGDIHRYEPA                  | S | -1.4  | 5.22  |              |
| 24  | Q9HRR0 Q9HRR0 | 1 | 1459.6653 | 1.0   | 109   | 120 | 0  | 64.1  | 34 | T | SMFENTVEQFKT                  | A | -0.7  | 4.26  |              |
| 24  | Q9HRR0 Q9HRR0 | 1 | 1477.6586 | 2.5   | 5     | 17  | 0  | 46.5  | 34 | K | GSNYGDIHRYEPA                 | S | -1.4  | 5.22  |              |
| 24  | Q9HRR0 Q9HRR0 | 1 | 1530.7024 | 3.9   | 109   | 121 | 0  | 78.9  | 35 | T | SMFENTVEQFKTA                 | L | -0.5  | 4.26  |              |
| 24  | Q9HRR0 Q9HRR0 | 1 | 1592.7834 | -3.2  | 94    | 105 | 0  | 36.1  | 35 | R | KWEDLYIREDQV                  | D | -1.3  | 4.06  |              |
| 25  | Q9HSQ7 Q9HSQ7 | 1 | 2034.8039 | 2.8   | 7     | 24  | 0  | 40.6  | 26 | D | NEGDDDPFEEQRADVDNA            | M | -1.9  | 3.2   |              |
| 25  | Q9HSQ7 Q9HSQ7 | 1 | 2039.9283 | 8.3   | 358   | 375 | 0  | 63.1  | 35 | M | NEPSRIEENPDADELVVD            | D | -1.2  | 3.32  |              |
| 25  | Q9HSQ7 Q9HSQ7 | 1 | 2040.9124 | 5.0   | 359   | 376 | 0  | 58.8  | 34 | N | EPSRIEENPDADELVDD             | G | -1.2  | 3.24  |              |
| 25  | Q9HSQ7 Q9HSQ7 | 1 | 2154.9553 | 3.1   | 358   | 376 | 0  | 109.1 | 33 | M | NEPSRIEENPDADELVDD            | G | -1.3  | 3.24  |              |
| 26  | Q9HRL1 Q9HRL1 | 1 | 1517.7878 | -0.8  | 335   | 347 | 0  | 52.8  | 35 | I | NSALSLFYYSRVV                 | K | 0.6   | 9.58  |              |

| hit | accession     | z | mass      | ppm   | start | end | mc | score | id | - | sequence                  | + | gravy | pl    | modification |
|-----|---------------|---|-----------|-------|-------|-----|----|-------|----|---|---------------------------|---|-------|-------|--------------|
| 26  | Q9HRL1 Q9HRL1 | 1 | 1940.948  | -0.6  | 350   | 366 | 0  | 58.2  | 35 | A | LWIEDPRDDL SLSGQPT        | G | -0.8  | 3.5   |              |
| 26  | Q9HRL1 Q9HRL1 | 1 | 2070.984  | -2.2  | 131   | 149 | 0  | 52.4  | 35 | A | SVPFHFWAPEAYEGAPAPV       | S | 0.1   | 4.24  |              |
| 26  | Q9HRL1 Q9HRL1 | 1 | 2142.0211 | -0.8  | 130   | 149 | 0  | 134.1 | 35 | T | ASVPFHFWAPEAYEGAPAPV      | S | 0.2   | 4.24  |              |
| 27  | Q9HNB9 Q9HNB9 | 1 | 1631.6587 | 1.3   | 26    | 38  | 0  | 77.7  | 28 | Q | SDDQYEETRDVEF             | D | -1.9  | 3.38  |              |
| 27  | Q9HNB9 Q9HNB9 | 1 | 1746.6857 | -3.6  | 26    | 39  | 0  | 79.1  | 25 | Q | SDDQYEETRDVEFD            | L | -2.0  | 3.28  |              |
| 27  | Q9HNB9 Q9HNB9 | 1 | 2444.0139 | -0.8  | 26    | 46  | 0  | 91.2  | 28 | Q | SDDQYEETRDVEFDLPAEDTA     | V | -1.4  | 3.16  |              |
| 28  | Q9HQP2 Q9HQP2 | 1 | 1263.6976 | -0.5  | 162   | 172 | 0  | 38.8  | 31 | L | GLLPGYFLQRT               | L | 0.2   | 9.84  |              |
| 28  | Q9HQP2 Q9HQP2 | 1 | 1269.5778 | -19.5 | 208   | 217 | 0  | 32.1  | 32 | V | FEQFRAWDAT                | G | -0.7  | 4.08  |              |
| 29  | Q9HHP3 Q9HHP3 | 1 | 1600.7594 | -3.8  | 228   | 241 | 0  | 50.5  | 35 | A | AVDPESGDQVWRRS            | L | -1.2  | 4.3   |              |
| 29  | Q9HHP3 Q9HHP3 | 1 | 1615.7519 | -0.1  | 39    | 53  | 0  | 54.4  | 35 | I | QDAPVGEVTGPWPTY           | Q | -0.6  | 3     |              |
| 29  | Q9HHP3 Q9HHP3 | 1 | 1671.7965 | -2.1  | 227   | 241 | 0  | 38.2  | 35 | V | AAVDPESGDQVWRRS           | L | -1.0  | 4.3   |              |
| 29  | Q9HHP3 Q9HHP3 | 1 | 1911.8599 | 3.6   | 111   | 126 | 0  | 85.4  | 34 | T | SFDINENTRSWNVETT          | G | -1.2  | 3.82  |              |
| 31  | Q9HQA6 Q9HQA6 | 1 | 925.4869  | -5.8  | 300   | 307 | 0  | 37.4  | 32 | S | VSPEELRP                  | S | -0.9  | 4.26  |              |
| 31  | Q9HQA6 Q9HQA6 | 1 | 1176.5411 | 7.1   | 96    | 105 | 0  | 77.1  | 35 | D | FEDATDINPR                | K | -1.2  | 3.7   |              |
| 31  | Q9HQA6 Q9HQA6 | 1 | 1291.5681 | 1.1   | 95    | 105 | 0  | 77.5  | 33 | D | DFEDATDINPR               | K | -1.4  | 3.5   |              |
| 32  | Q9HMW4 Q9HMW4 | 1 | 1411.6884 | 1.0   | 348   | 359 | 0  | 53.2  | 34 | K | NPYRSWSGYLGI              | N | -0.6  | 9.58  |              |
| 32  | Q9HMW4 Q9HMW4 | 1 | 1578.7467 | -1.8  | 402   | 415 | 0  | 47.1  | 35 | T | LHPTWGPYAPENPT            | T | -1.1  | 5.12  |              |
| 32  | Q9HMW4 Q9HMW4 | 1 | 2202.097  | -6.2  | 252   | 270 | 0  | 37.0  | 36 | A | AFNGNLGPWDLKRWSSQSV       | M | -0.8  | 10.08 |              |
| 32  | Q9HMW4 Q9HMW4 | 1 | 2393.0692 | -0.8  | 231   | 251 | 0  | 72.2  | 33 | A | KPYVEAEDADGLEQDEEVMRA     | A | -1.1  | 3.62  |              |
| 32  | Q9HMW4 Q9HMW4 | 1 | 2577.1904 | -5.4  | 229   | 251 | 0  | 35.5  | 35 | A | LAKPYVEAEDADGLEQDEEVMRA   | A | -0.8  | 3.62  |              |
| 33  | Q9HQF4 Q9HQF4 | 1 | 1538.7577 | -1.6  | 102   | 116 | 0  | 93.5  | 35 | A | TEDGDPSVPGPIVFT           | E | -0.7  | 3.7   |              |
| 33  | Q9HQF4 Q9HQF4 | 1 | 2539.1926 | 0.4   | 102   | 125 | 0  | 57.1  | 35 | A | TEDGDPSVPGPIVTEEGQDIEVT   | L | -0.8  | 3.32  |              |
| 33  | Q9HQF4 Q9HQF4 | 1 | 2610.2297 | -1.5  | 101   | 125 | 0  | 64.8  | 36 | F | ATEDGDPSVPGPIVTEEGQDIEVT  | L | -0.7  | 3.32  |              |
| 34  | Q9HRL8 Q9HRL8 | 1 | 1243.5833 | 2.0   | 198   | 208 | 0  | 51.5  | 34 | G | RNPFDTPEAPT               | E | -1.5  | 4.08  |              |
| 34  | Q9HRL8 Q9HRL8 | 1 | 1826.8799 | -5.1  | 192   | 208 | 0  | 64.0  | 35 | A | NLAEVGRNPFDTPEAPT         | E | -0.8  | 3.82  |              |
| 34  | Q9HRL8 Q9HRL8 | 1 | 1955.9225 | 0.9   | 192   | 209 | 0  | 74.6  | 35 | A | NLAEVGRNPFDTPEAPTE        | I | -1.0  | 3.68  |              |
| 35  | Q9HMX1 Q9HMX1 | 1 | 1760.8329 | -1.8  | 111   | 126 | 0  | 53.3  | 35 | L | SRDVIPNQGYNDPSTV          | R | -1.0  | 3.88  |              |
| 35  | Q9HMX1 Q9HMX1 | 1 | 1987.0011 | 1.2   | 109   | 126 | 0  | 61.7  | 36 | T | LLSRDVIPNQGYNDPSTV        | R | -0.5  | 3.88  |              |
| 35  | Q9HMX1 Q9HMX1 | 1 | 2330.0146 | 0.6   | 497   | 519 | 0  | 43.6  | 32 | A | NALGDGIRD AIDPESEGGSEEEA  | A | -1.0  | 3.28  |              |
| 36  | Q9HM89 EF1A   | 1 | 1440.7937 | -6.2  | 235   | 249 | 0  | 34.7  | 33 | I | SGIGTVPVGRIETGV           | M | 0.5   | 6.98  |              |
| 36  | Q9HM89 EF1A   | 1 | 1443.7106 | -1.3  | 280   | 293 | 0  | 67.1  | 35 | N | AEPGDNVGFNVRGI            | G | -0.3  | 4.08  |              |
| 36  | Q9HM89 EF1A   | 1 | 1521.71   | -5.7  | 165   | 178 | 0  | 50.6  | 34 | V | KDLFGQVGFNPDDA            | K | -0.6  | 3.6   |              |
| 36  | Q9HM89 EF1A   | 1 | 1764.8319 | 2.8   | 162   | 178 | 0  | 87.0  | 35 | V | SGVKDLFGQVGFNPDDA         | K | -0.3  | 3.6   |              |
| 37  | Q9HR04 Q9HR04 | 1 | 1863.8024 | 1.0   | 94    | 108 | 0  | 66.5  | 32 | I | NQYYDDFSATQQTQR           | S | -1.9  | 3.88  |              |
| 37  | Q9HR04 Q9HR04 | 1 | 1950.8344 | -1.3  | 94    | 109 | 0  | 60.9  | 31 | I | NQYYDDFSATQQTQRS          | S | -1.9  | 3.88  |              |
| 37  | Q9HR04 Q9HR04 | 1 | 2491.2442 | 6.1   | 52    | 75  | 0  | 52.7  | 36 | A | IVQERPAPGGESIADLPDLEGELS  | I | -0.4  | 3.44  |              |
| 38  | Q9HSM4 DHE42  | 1 | 1255.6925 | -3.7  | 241   | 251 | 0  | 57.3  | 34 | A | LLLDDWGARVV               | A | 0.8   | 3.88  |              |
| 38  | Q9HSM4 DHE42  | 1 | 2482.1282 | 5.8   | 142   | 165 | 0  | 93.3  | 35 | F | AAELRDEVGPSQDIPAPDMGTDQAQ | T | -0.8  | 3.32  |              |
| 39  | Q9HMB6 Q9HMB6 | 1 | 1825.9098 | -5.0  | 5     | 21  | 0  | 69.8  | 35 | A | VYQGPGEIAVEEVPKPD         | I | -0.6  | 3.68  |              |
| 39  | Q9HMB6 Q9HMB6 | 1 | 2171.0747 | 2.9   | 65    | 85  | 0  | 129.2 | 36 | I | VEEVGDDVTSVAPGDRVIAPF     | A | 0.2   | 3.42  |              |

| hit | accession     | z | mass      | ppm   | start | end | mc | score | id | - | sequence               | + | gravy | pl    | modification             |
|-----|---------------|---|-----------|-------|-------|-----|----|-------|----|---|------------------------|---|-------|-------|--------------------------|
| 40  | Q9HMB7 Q9HMB7 | 1 | 1423.662  | 3.4   | 123   | 134 | 0  | 74.1  | 34 | A | REEDDFSIFAPV           | L | -0.4  | 3.58  |                          |
| 40  | Q9HMB7 Q9HMB7 | 1 | 2308.0648 | 8.6   | 380   | 398 | 0  | 121.1 | 35 | A | DVPEAWNDKYEEYLGVSRPE   | T | -1.4  | 3.82  |                          |
| 40  | Q9HMB7 Q9HMB7 | 1 | 2511.1402 | 5.6   | 189   | 211 | 0  | 37.2  | 35 | A | DIRSDVTLADPFAGSQFDVDTQ | E | -0.5  | 3.22  |                          |
| 41  | Q9HNL7 Q9HNL7 | 1 | 1405.7354 | -3.8  | 12    | 23  | 0  | 35.7  | 34 | F | GVYPNFERPKLS           | A | -0.9  | 9.72  |                          |
| 41  | Q9HNL7 Q9HNL7 | 1 | 1752.9199 | -8.0  | 9     | 23  | 0  | 48.7  | 35 | G | SLFGVPYNFERPKLS        | A | -0.3  | 9.72  |                          |
| 41  | Q9HNL7 Q9HNL7 | 1 | 1920.9444 | 0.0   | 28    | 44  | 0  | 84.2  | 36 | S | AYWQPGEGLMVEKPFGL      | G | -0.1  | 4.26  |                          |
| 41  | Q9HNL7 Q9HNL7 | 1 | 2451.2798 | 2.9   | 2     | 23  | 0  | 101.7 | 35 | M | VEKPTSGSLFGVPYNFERPKLS | A | -0.5  | 9.62  |                          |
| 42  | Q9HP76 Q9HP76 | 1 | 1741.8886 | -5.5  | 38    | 52  | 0  | 43.7  | 35 | E | YIEELAEQLQDRVPPA       | D | -0.4  | 3.68  |                          |
| 42  | Q9HP76 Q9HP76 | 1 | 2314.1117 | 3.8   | 38    | 57  | 0  | 43.4  | 36 | E | YIEELAEQLQDRVPPADWAEA  | Q | -0.5  | 3.44  |                          |
| 45  | Q9HRL9 Q9HRL9 | 1 | 1336.7139 | -6.9  | 344   | 355 | 0  | 62.1  | 33 | R | LGGVVDIPEPR            | A | 0.0   | 4.08  |                          |
| 45  | Q9HRL9 Q9HRL9 | 1 | 1556.841  | -0.2  | 548   | 562 | 0  | 68.5  | 34 | V | ATLGSLDVLGEVDR         | - | 0.6   | 3.7   |                          |
| 47  | Q9HPB1 SECY   | 1 | 1086.4883 | -8.8  | 55    | 63  | 0  | 42.4  | 32 | A | GNDFFGQFR              | S | -0.8  | 6.78  |                          |
| 47  | Q9HPB1 SECY   | 1 | 1135.5696 | -0.9  | 421   | 429 | 0  | 47.3  | 34 | V | MERYIPQVT              | V | -0.5  | 6.88  |                          |
| 48  | Q9HM85 EF2    | 1 | 1379.8024 | -3.0  | 614   | 625 | 0  | 38.8  | 29 | A | LIDADIRLLEPI           | Q | 0.8   | 3.7   |                          |
| 48  | Q9HM85 EF2    | 1 | 1786.8407 | 18.2  | 155   | 169 | 0  | 67.9  | 36 | I | SELQEGPEEMQERLL        | S | -1.2  | 3.68  |                          |
| 49  | Q9HMU9 Q9HMU9 | 1 | 1069.4393 | -3.3  | 37    | 45  | 0  | 35.1  | 29 | A | GYGYFFDIT              | T | -0.3  | 3.1   |                          |
| 49  | Q9HMU9 Q9HMU9 | 1 | 1269.6254 | -3.9  | 257   | 265 | 0  | 37.7  | 34 | G | YWRFNTRDL              | - | -1.4  | 9.84  |                          |
| 49  | Q9HMU9 Q9HMU9 | 1 | 1731.8904 | -0.1  | 193   | 207 | 0  | 42.8  | 35 | T | SEDSILNLTGRRQF         | L | -0.8  | 7.04  |                          |
| 49  | Q9HMU9 Q9HMU9 | 1 | 2168.0862 | 2.3   | 189   | 207 | 0  | 78.6  | 36 | V | AYTTSEDSILNLTGRRQF     | L | -0.7  | 6.96  |                          |
| 50  | Q9HMH3 Q9HMH3 | 1 | 1156.6088 | 22.0  | 390   | 400 | 0  | 36.1  | 34 | G | PETTVPAGDVL            | L | -0.1  | 4.08  |                          |
| 51  | Q9HMH4 Q9HMH4 | 1 | 1344.5358 | 5.1   | 56    | 67  | 0  | 53.9  | 28 | A | SFSYDDPDADTL           | G | -0.9  | 2.74  |                          |
| 51  | Q9HMH4 Q9HMH4 | 1 | 1773.7006 | 5.0   | 56    | 71  | 0  | 101.6 | 26 | A | SFSYDDPDADTLGWEG       | G | -1.0  | 2.72  |                          |
| 54  | Q9HP84 HTR4   | 1 | 731.4582  | -4.6  | 324   | 330 | 0  | 29.2  | 26 | T | GILGFIL                | V | 2.7   | 6.02  |                          |
| 57  | Q9HSC3 LONH   | 1 | 1309.7241 | -7.3  | 403   | 414 | 0  | 62.5  | 32 | F | APDAIRELILEA           | K | 0.5   | 3.82  |                          |
| 58  | Q9HMX0 Q9HMX0 | 1 | 1880.9785 | 2.3   | 188   | 205 | 0  | 36.1  | 35 | S | NALQHLFSGIDPFAGVPV     | L | 0.6   | 4.94  |                          |
| 58  | Q9HMX0 Q9HMX0 | 1 | 1968.0105 | 2.3   | 187   | 205 | 0  | 78.8  | 35 | T | SNALQHLFSGIDPFAGVPV    | L | 0.5   | 4.94  |                          |
| 61  | Q9HQ23 Q9HQ23 | 1 | 866.5225  | 24.8  | 286   | 294 | 0  | 26.1  | 24 | G | LPLLNGGAI              | A | 1.3   | 6.02  |                          |
| 62  | Q9HNN6 Q9HNN6 | 1 | 2021.8926 | -4.7  | 163   | 181 | 0  | 39.0  | 32 | G | AFVEPDQDSQADADRGSKS    | R | -1.3  | 3.76  |                          |
| 63  | Q9HT00 GLMS   | 1 | 930.4658  | 10.2  | 537   | 546 | 0  | 51.2  | 36 | G | ADVIGLASDA             | G | 1.0   | 2.92  |                          |
| 64  | Q9HP88 Q9HP88 | 1 | 1498.7126 | 0.7   | 171   | 183 | 0  | 77.5  | 34 | T | AFRDYASTDMLPL          | A | 0.0   | 3.88  |                          |
| 64  | Q9HP88 Q9HP88 | 1 | 1689.9301 | -2.5  | 397   | 412 | 0  | 55.1  | 32 | I | LLPIAPGLDDTPEIRA       | Q | 0.2   | 3.7   |                          |
| 66  | Q9HNY9 Q9HNY9 | 1 | 1156.5975 | 26.6  | 218   | 229 | 0  | 35.6  | 34 | R | AVDLLDGAALAE           | A | 1.0   | 2.88  |                          |
| 66  | Q9HNY9 Q9HNY9 | 1 | 1227.6347 | 12.9  | 218   | 230 | 0  | 40.9  | 34 | R | AVDLLDGAALAE           | S | 1.1   | 2.88  |                          |
| 74  | Q9HPA6 Q9HPA6 | 1 | 1637.7719 | -4.2  | 164   | 176 | 0  | 72.2  | 35 | S | KYQEQAQELQDKM          | S | -2.0  | 4.44  |                          |
| 75  | Q9HNR0 Q9HNR0 | 1 | 1097.4989 | 27.8  | 38    | 48  | 0  | 40.0  | 34 | G | QQAATGDPTNL            | N | -0.9  | 3.1   | Gln->pyro-Glu (N-term Q) |
| 77  | Q9HNS6 Q9HNS6 | 1 | 1361.7456 | -5.9  | 68    | 81  | 0  | 98.4  | 33 | T | NAIGFGPIVPHIA          | F | 0.9   | 7.84  |                          |
| 78  | Q9HS12 Q9HS12 | 1 | 731.4694  | -15.4 | 23    | 28  | 0  | 32.0  | 25 | V | FRALLL                 | A | 1.9   | 11.04 |                          |
| 78  | Q9HS12 Q9HS12 | 1 | 876.4263  | 24.2  | 511   | 518 | 0  | 48.2  | 34 | S | ETVTAMPL               | Q | 0.7   | 3.3   | Oxidation (M)            |
| 78  | Q9HS12 Q9HS12 | 1 | 974.5913  | 5.0   | 23    | 31  | 0  | 35.6  | 25 | V | FRALLLAAT              | L | 1.6   | 11.04 |                          |
| 80  | Q9HMK0 Q9HMK0 | 1 | 1573.6718 | 1.8   | 179   | 191 | 0  | 31.7  | 31 | A | SDVEAQEYFAERM          | D | -0.9  | 3.68  |                          |

| hit | accession     | z | mass      | ppm   | start | end | mc | score | id | - | sequence                | + | gravy | pl   | modification  |
|-----|---------------|---|-----------|-------|-------|-----|----|-------|----|---|-------------------------|---|-------|------|---------------|
| 80  | Q9HMK0 Q9HMK0 | 1 | 1807.7723 | 4.1   | 177   | 191 | 0  | 56.5  | 32 | D | YASDVEAQEYFAERM         | D | -0.7  | 3.68 |               |
| 80  | Q9HMK0 Q9HMK0 | 1 | 2619.1071 | 3.0   | 170   | 191 | 0  | 82.4  | 30 | E | LTTDHEDYASDVEAQEYFAERM  | D | -1.0  | 3.68 |               |
| 81  | Q9HQQ9 Q9HQQ9 | 1 | 1694.8839 | -1.5  | 334   | 349 | 0  | 68.2  | 35 | R | AVPVIDGLQDREADVV        | A | 0.3   | 3.5  |               |
| 85  | Q9HRL2 Q9HRL2 | 1 | 1401.7041 | -7.1  | 244   | 256 | 0  | 78.2  | 35 | T | WLPDAHVQAPTPA           | S | -0.2  | 4.94 |               |
| 91  | Q9HR92 HTR6   | 1 | 887.548   | 24.2  | 27    | 35  | 0  | 29.5  | 23 | K | FGVALLAVV               | V | 2.9   | 6.02 |               |
| 92  | Q9HSQ2 HTPX   | 1 | 1422.5721 | -0.8  | 57    | 68  | 0  | 75.8  | 28 | V | GAEDMDEQEFPFR           | I | -1.8  | 3.5  |               |
| 92  | Q9HSQ2 HTPX   | 1 | 1521.6406 | -0.2  | 56    | 68  | 0  | 93.3  | 30 | S | VGAEDMDEQEFPFR          | I | -1.3  | 3.5  |               |
| 94  | Q9HS26 Q9HS26 | 1 | 1711.7577 | 2.6   | 16    | 31  | 0  | 55.7  | 33 | A | GDDSEPEIDFYGGKLA        | S | -0.8  | 3.42 |               |
| 95  | P57684 ATKA   | 1 | 731.4582  | 0.1   | 548   | 554 | 0  | 25.7  | 25 | P | AFVGLLI                 | G | 2.9   | 6.02 |               |
| 96  | Q9HMB4 Q9HMB4 | 1 | 1621.8141 | 1.0   | 448   | 461 | 0  | 57.5  | 35 | A | EFIRDYVPFVPGPS          | A | 0.0   | 4.08 |               |
| 97  | Q9HR32 TOP6A  | 1 | 2300.0419 | 2.5   | 20    | 39  | 0  | 44.0  | 34 | I | AEQFYDQFADGDIPRMSLPT    | R | -0.6  | 3.5  |               |
| 100 | Q9HPQ2 Q9HPQ2 | 1 | 1402.6517 | -0.1  | 332   | 343 | 0  | 71.1  | 34 | A | YVVDNYGYSRPA            | T | -0.7  | 6.58 |               |
| 104 | Q9HR98 Q9HR98 | 1 | 2059.9698 | 5.3   | 134   | 153 | 0  | 70.0  | 35 | V | SFVDATDPDAVADAIRPETA    | F | -0.1  | 3.36 |               |
| 105 | Q9HMQ2 ASSY   | 1 | 1365.6564 | -2.7  | 146   | 156 | 0  | 44.5  | 35 | L | GLTREWEIEYA             | A | -0.7  | 3.96 |               |
| 105 | Q9HMQ2 ASSY   | 1 | 2114.9433 | -11.2 | 181   | 199 | 0  | 50.8  | 32 | R | SVEGGHLEEDYQPPADIY      | A | -1.0  | 3.5  |               |
| 109 | Q9HMQ8 Q9HMQ8 | 1 | 1972.0856 | -7.8  | 269   | 288 | 0  | 33.5  | 33 | A | AVGAVVFAAGLLAFPPVMQ     | S | 1.9   | 6.02 | Oxidation (M) |
| 110 | Q9HS00 Q9HS00 | 1 | 799.4804  | 13.9  | 492   | 500 | 0  | 32.1  | 30 | T | AAVVAATVV               | R | 2.6   | 6.02 |               |
| 112 | Q9HHI3 Q9HHI3 | 1 | 1145.5088 | -12.1 | 69    | 79  | 0  | 32.6  | 32 | V | SLPDSVETDPS             | I | -0.8  | 2.88 |               |
| 115 | Q9HQU8 Q9HQU8 | 1 | 2107.9698 | -0.5  | 13    | 30  | 0  | 41.1  | 35 | A | RLTDQDEFTPPESFVEQA      | N | -1.1  | 3.5  |               |
| 117 | Q9HT01 Q9HT01 | 1 | 731.4582  | -0.1  | 552   | 558 | 0  | 25.7  | 25 | R | IGVAFLL                 | V | 2.9   | 6.02 |               |
| 119 | Q9HP48 Q9HP48 | 1 | 1821.7694 | 6.5   | 204   | 220 | 0  | 74.7  | 31 | V | FESGVDHFEVDDDGALA       | A | -0.3  | 3.32 |               |
| 119 | Q9HP48 Q9HP48 | 1 | 1892.8065 | 2.0   | 204   | 221 | 0  | 53.6  | 31 | V | FESGVDHFEVDDDGALAA      | A | -0.1  | 3.32 |               |
| 122 | Q9HPG8 Q9HPG8 | 1 | 1317.6241 | 0.8   | 661   | 670 | 0  | 67.9  | 35 | V | EFDDYFLRTL              | E | -0.4  | 3.7  |               |
| 126 | P25964 BACS1  | 1 | 1355.5816 | -0.8  | 219   | 230 | 0  | 36.0  | 31 | V | FMHSESPPAPEQ            | A | -1.1  | 4.24 |               |
| 128 | Q9HN02 Q9HN02 | 1 | 1096.5917 | -0.8  | 163   | 171 | 0  | 52.0  | 32 | V | LFDYLTRAV               | N | 0.7   | 6.7  |               |
| 131 | Q9HHP2 Q9HHP2 | 1 | 762.4024  | 19.3  | 502   | 508 | 0  | 35.6  | 32 | P | ARLFADA                 | P | 0.6   | 6.78 |               |
| 139 | Q9HMZ3 Q9HMZ3 | 1 | 2517.1237 | 3.8   | 413   | 432 | 0  | 53.9  | 34 | V | EYLWYVGDYPSYDERNQHIA    | R | -1.2  | 4.06 |               |
| 141 | Q9HRR3 Q9HRR3 | 1 | 1128.5716 | 0.2   | 176   | 184 | 0  | 43.2  | 35 | R | RPVEQPFWA               | S | -0.8  | 6.98 |               |
| 141 | Q9HRR3 Q9HRR3 | 1 | 1900.86   | -2.8  | 235   | 248 | 0  | 39.4  | 33 | T | MREGYMYDLNKRY           | K | -1.5  | 9.3  |               |
| 144 | Q9HN43 CAPPA  | 1 | 1267.6561 | 11.5  | 308   | 319 | 0  | 45.9  | 33 | L | RDADLGAPPFPI            | D | -0.2  | 3.88 |               |
| 146 | Q9HRJ5 Q9HRJ5 | 1 | 1243.6561 | -15.1 | 96    | 106 | 0  | 36.8  | 35 | A | TTPLSRAEWLA             | A | -0.1  | 6.98 |               |
| 148 | Q9HNI3 Q9HNI3 | 1 | 731.4582  | 0.1   | 114   | 120 | 0  | 30.6  | 25 | G | FGLAVIL                 | A | 2.9   | 6.02 |               |
| 149 | Q9HS86 Q9HS86 | 1 | 1261.5939 | -0.5  | 95    | 106 | 0  | 42.6  | 35 | I | AAGEFERADIPS            | S | -0.4  | 3.82 |               |
| 160 | Q9HN22 Q9HN22 | 1 | 1719.8104 | 2.4   | 149   | 165 | 0  | 48.7  | 35 | A | AAFLADIDHSAYGTTTPA      | Q | 0.3   | 3.88 |               |
| 160 | Q9HN22 Q9HN22 | 1 | 1875.8487 | -4.1  | 121   | 139 | 0  | 86.6  | 33 | R | HPDTLPDTPGDPTDGAVAT     | D | -0.8  | 3.42 |               |
| 166 | Q9HNP7 Q9HNP7 | 1 | 1784.9632 | 19.9  | 270   | 288 | 0  | 43.2  | 32 | V | RLGTVSGEEVGLVGASALA     | D | 0.7   | 4.26 |               |
| 173 | Q9HRT0 Q9HRT0 | 1 | 731.4582  | -6.0  | 73    | 79  | 0  | 30.5  | 26 | M | GLIFGLI                 | G | 2.7   | 6.02 |               |
| 174 | Q9HP01 Q9HP01 | 1 | 887.5328  | 29.2  | 79    | 87  | 0  | 41.8  | 24 | F | VTSLLLSVG               | I | 1.9   | 6.02 |               |
| 175 | Q9HQ43 Q9HQ43 | 1 | 2524.1242 | -1.7  | 141   | 163 | 0  | 60.6  | 33 | A | FLDTGSDDTVAPRDDDDLAVQPY | T | -0.7  | 3.14 |               |
| 176 | Q9HPT9 Q9HPT9 | 1 | 2263.0128 | 2.7   | 61    | 82  | 0  | 56.9  | 34 | A | ALDLPGHGSDDIETDPGPETL   | D | -0.8  | 3.22 |               |

| hit | accession     | z | mass      | ppm   | start | end | mc | score | id | - | sequence                             | + | gravy | pl    | modification    |
|-----|---------------|---|-----------|-------|-------|-----|----|-------|----|---|--------------------------------------|---|-------|-------|-----------------|
| 184 | Q48294 Q48294 | 1 | 1551.7569 | -6.6  | 376   | 388 | 0  | 48.1  | 35 | Y | TLERPVDVNFGEYL                       | R | -0.6  | 3.82  |                 |
| 187 | Q9HR74 Q9HR74 | 1 | 2213.0753 | -14.6 | 540   | 558 | 0  | 53.5  | 35 | P | TTRQADILPAAHWFETED                   | L | -0.5  | 4.06  |                 |
| 195 | Q9HQU4 Q9HQU4 | 1 | 1972.0378 | 16.4  | 260   | 278 | 0  | 36.8  | 33 | R | LRVGVAVGPFDFTERATAVD                 | E | 0.3   | 4.3   |                 |
| 200 | Q9HR22 Q9HR22 | 1 | 1658.8304 | 2.2   | 72    | 86  | 0  | 36.5  | 35 | V | YSELFGLGAIGHPEQV                     | L | 0.2   | 4.24  |                 |
| 207 | Q9HP66 Q9HP66 | 1 | 830.5266  | 9.9   | 117   | 124 | 0  | 25.1  | 23 | V | FLGLLAVV                             | L | 3.0   | 6.02  |                 |
| 211 | Q9HRZ2 Q9HRZ2 | 1 | 2117.0211 | 3.3   | 257   | 277 | 0  | 77.8  | 36 | A | ATNPSIDGGEYIGPGGVLNMR                | G | -0.3  | 4.08  |                 |
| 217 | Q9HNS4 Q9HNS4 | 1 | 2258.9492 | 8.6   | 321   | 339 | 0  | 55.7  | 31 | L | YEPDVSDDPTDITRDYF                    | L | -1.4  | 3.18  |                 |
| 222 | Q9HSW2 Q9HSW2 | 1 | 713.4799  | 27.2  | 22    | 27  | 0  | 25.1  | 18 | S | IRSLLI                               | I | 1.9   | 11.04 |                 |
| 239 | Q9HPY6 Q9HPY6 | 1 | 731.4694  | -20.0 | 390   | 395 | 0  | 34.3  | 26 | A | FARLLL                               | A | 1.9   | 11.04 |                 |
| 246 | Q9HQN2 Q9HQN2 | 1 | 1311.6605 | -28.9 | 156   | 168 | 0  | 34.1  | 34 | A | VDSLPAQAAGPR                         | P | 0.0   | 6.78  |                 |
| 255 | Q9HRS9 Q9HRS9 | 1 | 1311.6533 | -25.4 | 184   | 195 | 0  | 51.5  | 34 | S | WLPDAMVAPTPTV                        | S | 0.7   | 3.1   | Oxidation (M)   |
| 258 | Q9HMU8 Q9HMU8 | 1 | 1186.671  | -7.0  | 47    | 56  | 0  | 79.6  | 33 | I | NILLDFVRPT                           | T | 0.5   | 6.78  |                 |
| 264 | Q9HN37 Q9HN37 | 1 | 1314.8275 | -13.2 | 539   | 550 | 0  | 25.2  | 24 | A | LVFQVKLSVIA                          | A | 2.1   | 10.1  |                 |
| 266 | Q9HN92 Q9HN92 | 1 | 955.5273  | -2.9  | 1     | 8   | 0  | 42.7  | 33 | - | MNVRPQVI                             | A | 0.2   | 11.04 |                 |
| 266 | Q9HN92 Q9HN92 | 1 | 1026.5644 | 0.6   | 1     | 9   | 0  | 55.2  | 33 | - | MNVRPQVIA                            | T | 0.4   | 11.04 |                 |
| 282 | Q9HR54 Q9HR54 | 1 | 958.5964  | 20.2  | 335   | 343 | 0  | 24.0  | 18 | V | LFRAGGLLL                            | V | 1.6   | 11.04 |                 |
| 290 | Q9HSZ8 Q9HSZ8 | 1 | 763.3422  | 18.1  | 14    | 20  | 0  | 40.9  | 34 | R | MGPLTET                              | R | -0.2  | 3.3   | Oxidation (M)   |
| 301 | Q9HNU9 COFG   | 1 | 1901.0339 | -4.4  | 257   | 273 | 0  | 34.8  | 34 | E | TMRRVVAMARAVLPAEV                    | G | 0.7   | 12.1  | 2 Oxidation (M) |
| 317 | Q9HQU3 Q9HQU3 | 1 | 731.4582  | -6.0  | 143   | 149 | 0  | 36.3  | 26 | V | IIGLGL                               | A | 2.7   | 6.02  |                 |
| 318 | Q9HMU6 Q9HMU6 | 1 | 1231.6098 | -6.7  | 114   | 124 | 0  | 46.9  | 35 | V | GDSPPRWHPAL                          | L | -1.1  | 7.84  |                 |
| 320 | Q9HNV7 Q9HNV7 | 1 | 1582.7086 | 1.7   | 235   | 248 | 0  | 59.8  | 33 | L | MFQGLEGYDDVRPG                       | S | -0.7  | 3.7   |                 |
| 323 | Q9HQ64 Q9HQ64 | 1 | 1716.8907 | -1.9  | 79    | 94  | 0  | 71.3  | 35 | V | YNALVNQGIENAKRA                      | A | -0.6  | 9.72  |                 |
| 325 | Q9HN54 Q9HN54 | 1 | 1366.6299 | 0.0   | 8     | 18  | 0  | 45.8  | 34 | R | MDEYDQRALRA                          | S | -1.4  | 4.3   |                 |
| 339 | Q9HMJ2 Q9HMJ2 | 1 | 876.4263  | 24.2  | 149   | 156 | 0  | 36.3  | 34 | A | EVSMADI                              | D | 1.1   | 3     |                 |
| 362 | Q9HST4 MOAA   | 1 | 3508.5649 | -19.5 | 232   | 267 | 0  | 31.1  | 30 | V | SSRDAGSTADDAQSVTPDGGAHDPDQGMVEIVDPVG | N | -0.5  | 3.52  |                 |
| 374 | Q9HPI6 Q9HPI6 | 1 | 882.5175  | 26.2  | 15    | 24  | 0  | 33.2  | 28 | T | LPAAIGGITA                           | Y | 1.5   | 6.02  |                 |
| 391 | P57697 PSMA   | 1 | 731.4582  | -4.6  | 134   | 140 | 0  | 46.7  | 26 | P | FGVALLI                              | A | 2.9   | 6.02  |                 |
| 402 | Q9HNQ9 Q9HNQ9 | 1 | 1122.5094 | 7.9   | 209   | 218 | 0  | 44.0  | 34 | S | GGFWESVDRA                           | M | -0.5  | 4.08  |                 |
| 412 | Q9HQ52 THYX   | 1 | 2507.2292 | 5.6   | 111   | 134 | 0  | 65.1  | 36 | A | AVAEGELVVTTPSATDPDWVGRNQ             | D | -0.3  | 3.58  |                 |
| 449 | Q9HPW3 Q9HPW3 | 1 | 1900.9968 | 15.1  | 29    | 48  | 0  | 36.3  | 34 | L | ALAVAAGLFAALPDVDMVAA                 | L | 1.7   | 2.92  | Oxidation (M)   |
| 453 | Q9HSW6 CDC61  | 1 | 1098.6172 | -23.7 | 145   | 154 | 0  | 36.6  | 33 | I | LIVLDEVDI                            | G | 1.6   | 2.88  |                 |
| 462 | Q9HN08 Q9HN08 | 1 | 1727.8625 | 11.9  | 1     | 16  | 0  | 39.1  | 35 | - | MPTQDGERRRDVIVGG                     | G | -0.5  | 4.3   |                 |
| 474 | Q9HRL4 Q9HRL4 | 1 | 1369.6514 | 2.0   | 83    | 93  | 0  | 56.1  | 34 | T | LYRNFDDIVT                           | N | -0.5  | 3.6   |                 |
| 476 | Q9HM88 Q9HM88 | 1 | 1187.567  | -5.2  | 56    | 68  | 0  | 37.0  | 35 | A | SEIGTGAPSDALA                        | A | 0.2   | 3     |                 |
| 479 | Q9HRS4 Q9HRS4 | 1 | 2054.809  | 6.7   | 16    | 35  | 0  | 81.0  | 26 | A | AADQGIDPWTADDHEGGDGE                 | - | -1.3  | 3.22  |                 |
| 493 | Q9HN36 Q9HN36 | 1 | 731.4581  | -4.6  | 259   | 264 | 0  | 39.6  | 26 | T | FNLLLL                               | V | 2.4   | 6.02  |                 |
| 519 | Q9HNC8 Q9HNC8 | 1 | 789.3981  | 13.4  | 107   | 114 | 0  | 36.0  | 35 | Y | TGITGGRE                             | N | -0.8  | 6.98  |                 |
| 542 | Q9HMC9 Q9HMC9 | 1 | 1137.6758 | 0.7   | 533   | 543 | 0  | 27.1  | 27 | S | NNASVLLIPV                           | A | 1.6   | 6.02  |                 |
| 558 | Q9HQU7 Q9HQU7 | 1 | 1071.5461 | -3.5  | 166   | 174 | 0  | 48.9  | 35 | A | STLQPNAWR                            | I | -1.1  | 11.04 |                 |
| 559 | Q9HRK1 Q9HRK1 | 1 | 1651.7995 | -1.9  | 14    | 28  | 0  | 49.1  | 35 | H | HLPAVEDWPKGFGEA                      | S | -0.5  | 4.42  |                 |

| hit  | accession     | z | mass      | ppm   | start | end | mc | score | id | - | sequence              | + | gravy | pl    | modification             |
|------|---------------|---|-----------|-------|-------|-----|----|-------|----|---|-----------------------|---|-------|-------|--------------------------|
| 560  | Q9HRS8 Q9HRS8 | 1 | 887.5844  | -24.0 | 98    | 105 | 0  | 23.6  | 23 | L | IVVGLFIK              | V | 2.5   | 10.1  |                          |
| 564  | Q9HPK2 Y1595  | 1 | 974.5648  | 29.6  | 69    | 77  | 0  | 38.2  | 26 | G | STLLQLIS              | D | 1.0   | 6.02  |                          |
| 585  | Q9HQ34 Q9HQ34 | 1 | 1008.5968 | 8.5   | 139   | 149 | 0  | 34.8  | 25 | A | GLAGVVIVANP           | G | 1.7   | 6.02  |                          |
| 599  | Q9HQI3 Q9HQI3 | 1 | 1208.7353 | -22.2 | 44    | 54  | 0  | 29.4  | 28 | Y | ILEAGGKRLRP           | A | -0.4  | 11.32 |                          |
| 603  | Q9HPQ1 Q9HPQ1 | 1 | 731.4582  | -6.0  | 376   | 382 | 0  | 28.3  | 26 | A | GLIGFLL               | F | 2.6   | 6.02  |                          |
| 615  | Q9HSF1 Q9HSF1 | 1 | 1882.9313 | -10.2 | 218   | 233 | 0  | 53.2  | 35 | A | TFLEEFVDQGTIDTLR      | A | -0.2  | 3.58  |                          |
| 618  | Q9HQV6 Q9HQV6 | 1 | 731.4582  | -4.6  | 27    | 33  | 0  | 55.8  | 26 | L | FGLLLL                | P | 2.6   | 6.02  |                          |
| 618  | Q9HQV6 Q9HQV6 | 1 | 731.4582  | -6.0  | 26    | 32  | 0  | 32.5  | 26 | V | LFGLLLL               | I | 2.5   | 6.02  |                          |
| 650  | Q9HNE5 Q9HNE5 | 1 | 1727.9319 | -29.6 | 27    | 43  | 0  | 36.8  | 35 | R | PTAGFSPTRRDAVLGAL     | A | 0.1   | 10.88 |                          |
| 684  | O52037 O52037 | 1 | 1008.6304 | -27.5 | 20    | 28  | 0  | 34.7  | 25 | R | ARLRLAGPR             | S | -0.5  | 12.7  |                          |
| 704  | O51975 O51975 | 1 | 713.4799  | 27.2  | 189   | 194 | 0  | 23.0  | 18 | R | LRSLLI                | I | 1.8   | 11.04 |                          |
| 717  | Q9HML4 Q9HML4 | 1 | 745.4222  | 17.8  | 275   | 281 | 0  | 29.4  | 29 | D | LVDVSLT               | P | 1.6   | 3.1   |                          |
| 732  | Q9HSA0 Q9HSA0 | 1 | 1260.6251 | -2.2  | 39    | 50  | 0  | 52.5  | 35 | A | FEHGLPSGPHLA          | D | -0.2  | 6.02  |                          |
| 791  | Q9HNB8 Q9HNB8 | 1 | 1293.6717 | -8.5  | 12    | 24  | 0  | 34.3  | 34 | A | SGHLAPLFDAAPV         | R | 0.7   | 4.94  |                          |
| 808  | Q9HS40 Q9HS40 | 1 | 1544.6995 | 3.3   | 151   | 163 | 0  | 40.4  | 34 | A | DSFVDSLSEETTF         | L | -0.6  | 3.58  |                          |
| 830  | Q9HQE2 Q9HQE2 | 1 | 1498.8104 | -11.5 | 114   | 127 | 0  | 36.3  | 34 | L | DRLRDAGLDVAVVT        | N | 0.2   | 4.18  |                          |
| 861  | Q9HP98 Q9HP98 | 1 | 930.5022  | -21.7 | 23    | 32  | 0  | 40.6  | 36 | G | SVVLLSGEAG            | A | 1.2   | 3.3   |                          |
| 864  | Q9HPF2 RADB   | 1 | 866.5225  | 24.8  | 146   | 153 | 0  | 28.2  | 24 | Q | ITHLLSLA              | R | 1.6   | 7.84  |                          |
| 880  | Q9HRW7 Q9HRW7 | 1 | 1618.7012 | 8.1   | 2     | 15  | 0  | 47.8  | 33 | M | SDALDAFDHDAWRT        | A | -0.9  | 3.86  |                          |
| 894  | Q9HRN0 Q9HRN0 | 1 | 1159.6601 | -5.5  | 57    | 69  | 0  | 32.0  | 32 | T | AFAALVAAGSLAV         | T | 2.2   | 6.02  |                          |
| 899  | Q9HME2 Q9HME2 | 1 | 1988.0078 | 0.6   | 2     | 18  | 0  | 42.4  | 35 | M | VWIIDNLVTMVEHFTTA     | A | 0.9   | 4.06  |                          |
| 928  | Q9HMK6 Q9HMK6 | 1 | 1727.9166 | -19.4 | 184   | 199 | 0  | 36.0  | 35 | T | EKDVSEARRDAVLGAI      | T | -0.4  | 4.56  |                          |
| 939  | Q9HNI4 Q9HNI4 | 1 | 1216.5208 | 12.3  | 19    | 29  | 0  | 34.1  | 32 | E | SDEETRAPPSE           | A | -2.0  | 3.68  |                          |
| 1035 | Q9HSP8 Q9HSP8 | 1 | 1972.0517 | 9.4   | 108   | 128 | 0  | 33.6  | 33 | R | VALAGVLEAYAADIADGAAVL | A | 1.4   | 2.88  |                          |
| 1041 | Q9HR01 Q9HR01 | 1 | 830.5266  | 9.9   | 184   | 191 | 0  | 25.1  | 23 | H | LVFVLVAA              | T | 3.3   | 6.02  |                          |
| 1095 | Q9HRH6 Q9HRH6 | 1 | 1480.731  | 2.6   | 143   | 156 | 0  | 38.8  | 35 | A | SYTGLRWLAGGAET        | - | -0.2  | 6.88  |                          |
| 1125 | Q9HQ91 Q9HQ91 | 1 | 731.4582  | -6.0  | 14    | 20  | 0  | 30.5  | 26 | P | GLLFGLL               | L | 2.5   | 6.02  |                          |
| 1161 | Q9HMB0 Q9HMB0 | 1 | 896.4127  | -0.6  | 10    | 17  | 0  | 35.0  | 32 | L | LYTTPTDS              | D | -0.7  | 3.1   |                          |
| 1189 | Q9HRR5 Q9HRR5 | 1 | 1313.5863 | 4.4   | 22    | 32  | 0  | 38.7  | 33 | I | MAGWYRTPEFG           | H | -0.6  | 6.88  |                          |
| 1204 | Q9HSJ4 Q9HSJ4 | 1 | 830.5266  | 9.9   | 21    | 28  | 0  | 25.1  | 23 | G | VFVILAVA              | A | 3.4   | 6.02  |                          |
| 1247 | Q9HRR2 Q9HRR2 | 1 | 1688.8661 | -1.7  | 42    | 54  | 0  | 47.2  | 35 | V | DYLELLETLYYRV         | N | 0.0   | 3.82  |                          |
| 1287 | Q9HNI2 GLNA   | 1 | 866.5226  | 24.8  | 120   | 127 | 0  | 24.6  | 24 | R | QVLKNVLA              | R | 0.9   | 10.1  | Gln->pyro-Glu (N-term Q) |
| 1414 | Q9HQB1 Q9HQB1 | 1 | 958.6328  | -17.7 | 70    | 77  | 0  | 19.6  | 18 | V | KAVFRLLI              | E | 1.6   | 11.48 |                          |
| 1581 | Q9HRK3 Q9HRK3 | 1 | 974.5589  | 27.2  | 47    | 54  | 0  | 29.8  | 27 | I | IQFVLIGW              | I | 1.9   | 6.02  |                          |
| 1657 | Q9HP64 Q9HP64 | 1 | 830.5266  | 9.9   | 13    | 20  | 0  | 25.1  | 23 | C | FVLLGLA               | V | 3.0   | 6.02  |                          |
| 1659 | Q9HNA9 Q9HNA9 | 1 | 887.544   | 18.7  | 75    | 82  | 0  | 25.0  | 24 | Q | IVTSLSLR              | A | 1.2   | 11.04 |                          |

END OF LIST IV

| hit                                                                                     | accession   | z | mass      | ppm   | start | end | mc | score | id | - | sequence     | + | gravy | pI    | modification             |
|-----------------------------------------------------------------------------------------|-------------|---|-----------|-------|-------|-----|----|-------|----|---|--------------|---|-------|-------|--------------------------|
| <b>V. Purple membrane; elastase digest; nLC-MALDI MS/MS; AVLISTG search specificity</b> |             |   |           |       |       |     |    |       |    |   |              |   |       |       |                          |
| 1                                                                                       | P02945 BACR | 1 | 713.4799  | 27.2  | 234   | 239 | 4  | 28.4  | 14 | G | LILLRS       | R | 1.8   | 11.04 |                          |
| 1                                                                                       | P02945 BACR | 1 | 731.4582  | -4.6  | 231   | 237 | 5  | 57.7  | 22 | V | GFGLILL      | R | 2.6   | 6.02  |                          |
| 1                                                                                       | P02945 BACR | 1 | 734.4401  | -13.3 | 219   | 224 | 3  | 25.4  | 20 | T | LLFMVL       | D | 3.4   | 6.02  |                          |
| 1                                                                                       | P02945 BACR | 1 | 756.3919  | -5.4  | 19    | 24  | 1  | 27.5  | 27 | T | GRPEWI       | W | -1.1  | 6.98  |                          |
| 1                                                                                       | P02945 BACR | 1 | 762.4024  | 19.3  | 240   | 246 | 3  | 50.5  | 28 | S | RAIFGEA      | E | 0.4   | 6.98  |                          |
| 1                                                                                       | P02945 BACR | 1 | 799.4916  | 6.8   | 187   | 193 | 4  | 38.5  | 27 | V | LRNVTVV      | L | 1.1   | 11.04 |                          |
| 1                                                                                       | P02945 BACR | 1 | 817.4011  | -8.0  | 165   | 171 | 3  | 33.5  | 30 | V | LFFGFTS      | K | 1.5   | 6.02  |                          |
| 1                                                                                       | P02945 BACR | 1 | 828.3918  | 23.3  | 92    | 97  | 1  | 30.7  | 27 | I | YWARYA       | D | -0.7  | 9.58  |                          |
| 1                                                                                       | P02945 BACR | 1 | 829.4182  | -6.0  | 112   | 119 | 4  | 54.7  | 29 | A | LLVDADQG     | T | 0.3   | 2.92  |                          |
| 1                                                                                       | P02945 BACR | 1 | 834.4276  | -5.5  | 194   | 200 | 3  | 30.7  | 28 | V | LWSAYPV      | V | 0.7   | 5.92  |                          |
| 1                                                                                       | P02945 BACR | 1 | 835.4514  | -12.2 | 220   | 226 | 3  | 28.5  | 27 | L | LFMVLDV      | S | 2.5   | 3.1   |                          |
| 1                                                                                       | P02945 BACR | 1 | 857.4395  | -4.1  | 18    | 24  | 2  | 32.2  | 30 | I | TGRPEWI      | W | -1.0  | 6.98  |                          |
| 1                                                                                       | P02945 BACR | 1 | 869.4391  | -6.7  | 69    | 75  | 3  | 26.9  | 26 | T | MYLSMILL     | G | 1.9   | 5.92  |                          |
| 1                                                                                       | P02945 BACR | 1 | 887.4786  | -25.8 | 124   | 132 | 6  | 60.2  | 30 | A | LVGADGIMI    | G | 1.8   | 3.1   |                          |
| 1                                                                                       | P02945 BACR | 1 | 917.4276  | 0.1   | 174   | 181 | 2  | 37.9  | 29 | A | ESMRPEVA     | S | -0.8  | 4.26  |                          |
| 1                                                                                       | P02945 BACR | 1 | 930.4811  | -6.2  | 201   | 209 | 6  | 68.7  | 30 | V | VWLGISEGA    | G | 0.9   | 3.3   |                          |
| 1                                                                                       | P02945 BACR | 1 | 958.6215  | -6.1  | 229   | 237 | 6  | 44.1  | 14 | A | KVGFGLILL    | R | 2.0   | 10.1  |                          |
| 1                                                                                       | P02945 BACR | 1 | 967.5954  | -5.5  | 103   | 111 | 5  | 64.7  | 22 | T | TPLLLLDLA    | L | 1.7   | 3.1   |                          |
| 1                                                                                       | P02945 BACR | 1 | 974.5913  | -6.1  | 231   | 239 | 6  | 63.7  | 23 | V | GFGLILLRS    | R | 1.4   | 11.04 |                          |
| 1                                                                                       | P02945 BACR | 1 | 991.5015  | -7.5  | 98    | 105 | 2  | 29.0  | 29 | A | DWLFTTPL     | L | 0.4   | 3.1   |                          |
| 1                                                                                       | P02945 BACR | 1 | 1005.5356 | -1.8  | 238   | 246 | 4  | 37.5  | 28 | L | RSRAIFGEA    | E | -0.3  | 10.88 |                          |
| 1                                                                                       | P02945 BACR | 1 | 1032.44   | -18.0 | 243   | 252 | 2  | 80.2  | 23 | I | FGAEAEPEPS   | A | -0.9  | 3.02  |                          |
| 1                                                                                       | P02945 BACR | 1 | 1043.5499 | -2.0  | 112   | 121 | 6  | 72.5  | 30 | A | LLVDADQGTI   | L | 0.7   | 2.92  |                          |
| 1                                                                                       | P02945 BACR | 1 | 1055.5552 | -11.0 | 19    | 26  | 2  | 38.6  | 28 | T | GRPEWIWL     | A | -0.4  | 6.98  |                          |
| 1                                                                                       | P02945 BACR | 1 | 1062.6186 | -2.5  | 182   | 190 | 4  | 56.9  | 23 | A | STFKVLRNV    | T | 0.2   | 11.48 |                          |
| 1                                                                                       | P02945 BACR | 1 | 1069.5709 | -4.5  | 20    | 27  | 2  | 45.9  | 27 | G | RPEWIWLA     | L | -0.2  | 6.98  |                          |
| 1                                                                                       | P02945 BACR | 1 | 1070.5185 | 24.5  | 95    | 102 | 2  | 61.3  | 29 | A | RYADWLFT     | T | -0.3  | 6.7   |                          |
| 1                                                                                       | P02945 BACR | 1 | 1081.5556 | 1.9   | 16    | 24  | 3  | 61.4  | 28 | A | QITGRPEWI    | W | -0.7  | 6.98  | Gln->pyro-Glu (N-term Q) |
| 1                                                                                       | P02945 BACR | 1 | 1098.5822 | 2.5   | 16    | 24  | 3  | 50.6  | 28 | A | QITGRPEWI    | W | -0.7  | 6.98  |                          |
| 1                                                                                       | P02945 BACR | 1 | 1116.6907 | 4.9   | 227   | 237 | 8  | 53.5  | 18 | V | SAKVGFGLILL  | R | 1.7   | 10.1  |                          |
| 1                                                                                       | P02945 BACR | 1 | 1126.5923 | 16.7  | 19    | 27  | 3  | 51.6  | 27 | T | GRPEWIWLA    | L | -0.2  | 6.98  |                          |
| 1                                                                                       | P02945 BACR | 1 | 1145.524  | -25.4 | 242   | 252 | 3  | 79.0  | 25 | A | IFGEAEPEPS   | A | -0.4  | 3.02  |                          |
| 1                                                                                       | P02945 BACR | 1 | 1156.6029 | 6.2   | 18    | 26  | 3  | 56.0  | 29 | I | TGRPEWIWL    | A | -0.5  | 6.98  |                          |
| 1                                                                                       | P02945 BACR | 1 | 1156.634  | 0.3   | 112   | 122 | 7  | 106.5 | 28 | A | LLVDADQGTIL  | A | 0.9   | 2.92  |                          |
| 1                                                                                       | P02945 BACR | 1 | 1173.7234 | 2.8   | 184   | 193 | 5  | 18.7  | 18 | T | FKVLRNVTVV   | L | 1.1   | 11.48 |                          |
| 1                                                                                       | P02945 BACR | 1 | 1187.5645 | -21.1 | 81    | 91  | 2  | 93.9  | 27 | T | MVPPFGGEQNPI | Y | -0.1  | 3.3   |                          |
| 1                                                                                       | P02945 BACR | 1 | 1203.5594 | -19.2 | 81    | 91  | 2  | 81.4  | 27 | T | MVPPFGGEQNPI | Y | -0.1  | 3.3   | Oxidation (M)            |



| hit | accession   | z | mass      | ppm   | start | end | mc | score | id | - | sequence           | + | gravy | pl    | modification             |
|-----|-------------|---|-----------|-------|-------|-----|----|-------|----|---|--------------------|---|-------|-------|--------------------------|
| 1   | P02945 BACR | 1 | 1215.7115 | -8.0  | 101   | 111 | 6  | 62.7  | 25 | L | FTTPLLLLDLA        | L | 1.6   | 3.1   |                          |
| 1   | P02945 BACR | 1 | 1227.64   | 22.3  | 18    | 27  | 4  | 56.7  | 29 | I | TGRPEWIWLA         | L | -0.2  | 6.98  |                          |
| 1   | P02945 BACR | 1 | 1227.6711 | -24.1 | 112   | 123 | 8  | 113.1 | 28 | A | LLVDADQGTLA        | L | 1.0   | 2.92  |                          |
| 1   | P02945 BACR | 1 | 1239.6764 | -2.6  | 19    | 28  | 4  | 37.1  | 26 | T | GRPEWIWLAL         | G | 0.2   | 6.98  |                          |
| 1   | P02945 BACR | 1 | 1242.5822 | -3.0  | 92    | 100 | 2  | 36.3  | 27 | I | YWARYADWL          | F | -0.6  | 6.64  |                          |
| 1   | P02945 BACR | 1 | 1253.6292 | -0.8  | 48    | 58  | 3  | 66.4  | 28 | V | SDPDAKKFYAI        | T | -0.7  | 6.8   |                          |
| 1   | P02945 BACR | 1 | 1274.7711 | 3.0   | 183   | 193 | 6  | 61.6  | 20 | S | TFKVLNRNVTVV       | L | 0.9   | 11.48 |                          |
| 1   | P02945 BACR | 1 | 1280.6513 | 3.6   | 14    | 24  | 4  | 72.7  | 28 | S | QAQITGRPEWI        | W | -0.7  | 6.98  | Gln->pyro-Glu (N-term Q) |
| 1   | P02945 BACR | 1 | 1296.6979 | -7.1  | 19    | 29  | 5  | 43.9  | 27 | T | GRPEWIWLALG        | T | 0.2   | 6.98  |                          |
| 1   | P02945 BACR | 1 | 1296.7152 | -14.7 | 31    | 42  | 8  | 35.0  | 27 | T | ALMGLGTYLFLV       | K | 1.9   | 5.92  |                          |
| 1   | P02945 BACR | 1 | 1314.8136 | -2.6  | 231   | 242 | 8  | 70.3  | 17 | V | GFGLILLRSRAI       | F | 1.2   | 12.4  |                          |
| 1   | P02945 BACR | 1 | 1340.7241 | -0.5  | 18    | 28  | 5  | 28.5  | 27 | I | TGRPEWIWLAL        | G | 0.1   | 6.98  |                          |
| 1   | P02945 BACR | 1 | 1354.6769 | 5.9   | 48    | 59  | 4  | 75.7  | 28 | V | SDPDAKKFYAIT       | T | -0.7  | 6.8   |                          |
| 1   | P02945 BACR | 1 | 1361.8031 | 1.8   | 182   | 193 | 7  | 76.5  | 21 | A | STFKVLNRNVTVV      | L | 0.8   | 11.48 |                          |
| 1   | P02945 BACR | 1 | 1372.6623 | 5.1   | 240   | 252 | 4  | 109.7 | 29 | S | RAIFGEAEAPEPS      | A | -0.5  | 3.96  |                          |
| 1   | P02945 BACR | 1 | 1380.719  | -3.1  | 16    | 26  | 4  | 71.8  | 28 | A | QITGRPEWIWL        | A | -0.3  | 6.98  | Gln->pyro-Glu (N-term Q) |
| 1   | P02945 BACR | 1 | 1381.703  | 16.1  | 95    | 105 | 3  | 74.5  | 27 | A | RYADWLFTTPL        | L | -0.1  | 6.7   |                          |
| 1   | P02945 BACR | 1 | 1397.7456 | -0.4  | 18    | 29  | 6  | 55.3  | 28 | I | TGRPEWIWLALG       | T | 0.1   | 6.98  |                          |
| 1   | P02945 BACR | 1 | 1409.7919 | -15.3 | 201   | 214 | 9  | 111.2 | 26 | V | VWLIGSEGAGIVPL     | N | 1.3   | 3.3   |                          |
| 1   | P02945 BACR | 1 | 1443.6994 | 0.1   | 240   | 253 | 5  | 83.6  | 29 | S | RAIFGEAEAPEPSA     | G | -0.4  | 3.96  |                          |
| 1   | P02945 BACR | 1 | 1451.7561 | 1.0   | 16    | 27  | 5  | 88.0  | 28 | A | QITGRPEWIWLA       | L | -0.1  | 6.98  | Gln->pyro-Glu (N-term Q) |
| 1   | P02945 BACR | 1 | 1468.7827 | 11.0  | 16    | 27  | 5  | 61.8  | 27 | A | QITGRPEWIWLA       | L | -0.1  | 6.98  |                          |
| 1   | P02945 BACR | 1 | 1490.6983 | 2.3   | 92    | 102 | 3  | 53.0  | 29 | I | YWARYADWLFT        | T | -0.3  | 6.64  |                          |
| 1   | P02945 BACR | 1 | 1498.7932 | 0.3   | 18    | 30  | 7  | 89.2  | 28 | I | TGRPEWIWLALGT      | A | 0.0   | 6.98  |                          |
| 1   | P02945 BACR | 1 | 1540.7596 | -4.7  | 45    | 58  | 5  | 61.1  | 28 | G | MGVSDPDAKKFYAI     | T | -0.1  | 6.8   |                          |
| 1   | P02945 BACR | 1 | 1579.8147 | 0.2   | 14    | 26  | 5  | 81.9  | 28 | S | QAQITGRPEWIWL      | A | -0.4  | 6.98  | Gln->pyro-Glu (N-term Q) |
| 1   | P02945 BACR | 1 | 1607.7442 | 3.4   | 81    | 94  | 3  | 64.3  | 28 | T | MVPFGGEQNPIYWA     | R | -0.1  | 3.3   |                          |
| 1   | P02945 BACR | 1 | 1607.8712 | 4.1   | 95    | 107 | 5  | 77.8  | 26 | A | RYADWLFTTPLLL      | L | 0.5   | 6.7   |                          |
| 1   | P02945 BACR | 1 | 1615.7954 | 1.2   | 238   | 252 | 5  | 108.0 | 29 | L | RSRAIFGEAEAPEPS    | A | -0.8  | 4.56  |                          |
| 1   | P02945 BACR | 1 | 1629.9018 | 4.5   | 98    | 111 | 7  | 64.6  | 25 | A | DWLFTTPLLLLDLA     | L | 1.2   | 2.92  |                          |
| 1   | P02945 BACR | 1 | 1641.8072 | -6.3  | 45    | 59  | 6  | 95.7  | 28 | G | MGVSDPDAKKFYAIT    | T | -0.2  | 6.8   |                          |
| 1   | P02945 BACR | 1 | 1650.8518 | 10.8  | 14    | 27  | 6  | 106.1 | 27 | S | QAQITGRPEWIWLA     | L | -0.2  | 6.98  | Gln->pyro-Glu (N-term Q) |
| 1   | P02945 BACR | 1 | 1678.8025 | -3.5  | 76    | 91  | 6  | 123.4 | 28 | L | GYGLTMVFPFGGEQNPI  | Y | 0.0   | 3.3   |                          |
| 1   | P02945 BACR | 1 | 1686.8325 | -4.8  | 238   | 253 | 6  | 82.3  | 29 | L | RSRAIFGEAEAPEPSA   | G | -0.6  | 4.56  |                          |
| 1   | P02945 BACR | 1 | 1694.7974 | -7.2  | 76    | 91  | 6  | 115.0 | 27 | L | GYGLTMVFPFGGEQNPI  | Y | 0.0   | 3.3   | Oxidation (M)            |
| 1   | P02945 BACR | 1 | 1720.9552 | -1.7  | 95    | 108 | 6  | 101.0 | 24 | A | RYADWLFTTPLLLL     | D | 0.7   | 6.7   |                          |
| 1   | P02945 BACR | 1 | 1722.9093 | 8.1   | 16    | 30  | 8  | 98.0  | 26 | A | QITGRPEWIWLALGT    | A | 0.1   | 6.98  | Gln->pyro-Glu (N-term Q) |
| 1   | P02945 BACR | 1 | 1739.9359 | 3.7   | 16    | 30  | 8  | 70.5  | 26 | A | QITGRPEWIWLALGT    | A | 0.1   | 6.98  |                          |
| 1   | P02945 BACR | 1 | 1743.8064 | -2.3  | 240   | 257 | 8  | 54.0  | 27 | S | RAIFGEAEAPEPSAGDGA | A | -0.4  | 3.68  |                          |
| 1   | P02945 BACR | 1 | 1754.9104 | -2.2  | 13    | 27  | 7  | 33.0  | 27 | V | SQAQITGRPEWIWLA    | L | -0.3  | 6.98  |                          |

| hit | accession   | z | mass      | ppm   | start | end | mc | score | id | - | sequence            | + | gravy | pl    | modification             |
|-----|-------------|---|-----------|-------|-------|-----|----|-------|----|---|---------------------|---|-------|-------|--------------------------|
| 1   | P02945 BACR | 1 | 1801.8828 | 1.1   | 92    | 105 | 4  | 76.1  | 28 | I | YWARYADWLFTTPL      | L | -0.1  | 6.64  |                          |
| 1   | P02945 BACR | 1 | 1820.9574 | -22.7 | 14    | 29  | 8  | 49.8  | 28 | S | QAQITGRPEWIWLALG    | T | 0.0   | 6.98  | Gln->pyro-Glu (N-term Q) |
| 1   | P02945 BACR | 1 | 1826.9237 | 12.0  | 43    | 59  | 7  | 39.8  | 27 | V | KGMGVSDPDAKKFYAIT   | T | -0.4  | 9.56  |                          |
| 1   | P02945 BACR | 1 | 1835.9669 | -4.5  | 48    | 64  | 7  | 95.0  | 27 | V | SDPDAKKFYAITTLVPA   | I | 0.0   | 6.8   |                          |
| 1   | P02945 BACR | 1 | 1841.9635 | -11.6 | 236   | 252 | 7  | 64.1  | 28 | I | LLRSRAIFGEAEAPEPS   | A | -0.3  | 4.56  |                          |
| 1   | P02945 BACR | 1 | 1922.005  | -2.2  | 14    | 30  | 9  | 101.8 | 26 | S | QAQITGRPEWIWLALGT   | A | 0.0   | 6.98  | Gln->pyro-Glu (N-term Q) |
| 1   | P02945 BACR | 1 | 1955.0476 | -3.5  | 235   | 252 | 8  | 58.1  | 25 | L | ILLRSRAIFGEAEAPEPS  | A | 0.0   | 4.56  |                          |
| 1   | P02945 BACR | 1 | 2020.1033 | -2.5  | 95    | 111 | 8  | 127.6 | 24 | A | RYADWLFTTPLLLDLA    | L | 0.7   | 3.88  |                          |
| 1   | P02945 BACR | 1 | 2440.2831 | -0.2  | 92    | 111 | 9  | 75.3  | 22 | I | YWARYADWLFTTPLLLDLA | L | 0.6   | 3.88  |                          |
| 2   | P00772 ELA1 | 1 | 800.3851  | 9.2   | 54    | 61  | 5  | 46.1  | 27 | A | HTCGGTLI            | R | 0.7   | 7.16  |                          |
| 2   | P00772 ELA1 | 1 | 873.4093  | 0.5   | 34    | 40  | 1  | 28.8  | 28 | A | QRNSWPS             | Q | -2.2  | 11.04 |                          |
| 2   | P00772 ELA1 | 1 | 882.5287  | 0.6   | 138   | 146 | 5  | 30.3  | 24 | L | GVLPRAGTI           | L | 0.7   | 11.04 |                          |
| 2   | P00772 ELA1 | 1 | 890.461   | 15.9  | 156   | 163 | 5  | 49.8  | 28 | I | TGWGLTRT            | N | -0.6  | 11.04 |                          |
| 2   | P00772 ELA1 | 1 | 909.5396  | -9.1  | 136   | 144 | 4  | 42.3  | 21 | V | QLGVLPRAG           | T | 0.4   | 11.04 |                          |
| 2   | P00772 ELA1 | 1 | 915.4239  | -1.4  | 105   | 111 | 1  | 29.8  | 27 | V | VHPYWNT             | D | -1.0  | 7.76  |                          |
| 2   | P00772 ELA1 | 1 | 933.4491  | 0.3   | 62    | 68  | 1  | 40.3  | 29 | I | RQNWVMT             | A | -1.0  | 11.04 |                          |
| 2   | P00772 ELA1 | 1 | 943.4512  | -7.2  | 223   | 231 | 4  | 49.9  | 27 | V | NGQYAVHGV           | T | -0.2  | 7.76  |                          |
| 2   | P00772 ELA1 | 1 | 1004.4862 | -2.5  | 62    | 69  | 2  | 45.1  | 29 | I | RQNWVMTA            | A | -0.7  | 11.04 |                          |
| 2   | P00772 ELA1 | 1 | 1009.6284 | -7.9  | 139   | 148 | 6  | 31.2  | 21 | G | VLPRACTILA          | N | 1.3   | 11.04 |                          |
| 2   | P00772 ELA1 | 1 | 1014.4923 | 7.2   | 104   | 111 | 2  | 55.5  | 28 | I | VVHPYWNT            | D | -0.4  | 7.76  |                          |
| 2   | P00772 ELA1 | 1 | 1066.6499 | 0.0   | 138   | 148 | 7  | 54.4  | 21 | L | GVLPRAGTILA         | N | 1.1   | 11.04 |                          |
| 2   | P00772 ELA1 | 1 | 1097.5254 | 3.6   | 34    | 42  | 2  | 71.2  | 28 | A | QRNSWPSQI           | S | -1.6  | 11.04 | Gln->pyro-Glu (N-term Q) |
| 2   | P00772 ELA1 | 1 | 1114.5519 | 10.2  | 34    | 42  | 2  | 55.5  | 29 | A | QRNSWPSQI           | S | -1.6  | 11.04 |                          |
| 2   | P00772 ELA1 | 1 | 1123.6713 | -5.1  | 136   | 146 | 6  | 39.4  | 23 | V | QLGVLPRAGTI         | L | 0.6   | 11.04 |                          |
| 2   | P00772 ELA1 | 1 | 1171.6713 | -6.4  | 134   | 144 | 5  | 53.1  | 27 | S | YVQLGVLPRAG         | T | 0.6   | 9.84  |                          |
| 2   | P00772 ELA1 | 1 | 1214.5568 | -8.9  | 187   | 197 | 6  | 66.1  | 26 | S | SSYWGSTVKNS         | M | -0.9  | 9.72  |                          |
| 2   | P00772 ELA1 | 1 | 1240.5836 | -0.2  | 43    | 53  | 6  | 63.8  | 28 | I | SLQYRSGSSWA         | H | -0.7  | 9.84  |                          |
| 2   | P00772 ELA1 | 1 | 1244.5462 | 6.2   | 105   | 114 | 2  | 72.6  | 27 | V | VHPYWNTDDV          | A | -1.0  | 3.88  |                          |
| 2   | P00772 ELA1 | 1 | 1262.6659 | -15.8 | 254   | 264 | 6  | 41.0  | 29 | S | AYISWINNVIA         | S | 1.0   | 5.92  |                          |
| 2   | P00772 ELA1 | 1 | 1307.7925 | -5.4  | 136   | 148 | 8  | 22.4  | 20 | V | QLGVLPRAGTILA       | N | 1.0   | 11.04 |                          |
| 2   | P00772 ELA1 | 1 | 1315.5833 | 10.9  | 105   | 115 | 3  | 62.6  | 27 | V | VHPYWNTDDVA         | A | -0.7  | 3.88  |                          |
| 2   | P00772 ELA1 | 1 | 1321.6813 | -8.2  | 239   | 250 | 5  | 42.9  | 28 | L | GCNTRKPTVFT         | R | -0.2  | 10.1  |                          |
| 2   | P00772 ELA1 | 1 | 1343.6146 | -2.2  | 104   | 114 | 3  | 75.6  | 27 | I | VVHPYWNTDDV         | A | -0.5  | 3.88  |                          |
| 2   | P00772 ELA1 | 1 | 1385.8031 | -2.6  | 134   | 146 | 7  | 51.3  | 24 | S | YVQLGVLPRAGTI       | L | 0.8   | 9.84  |                          |
| 2   | P00772 ELA1 | 1 | 1386.6204 | 4.4   | 105   | 116 | 4  | 96.9  | 27 | V | VHPYWNTDDVAA        | G | -0.5  | 3.88  |                          |
| 2   | P00772 ELA1 | 1 | 1414.6517 | 1.6   | 104   | 115 | 4  | 81.2  | 28 | I | VVHPYWNTDDVA        | A | -0.3  | 3.88  |                          |
| 2   | P00772 ELA1 | 1 | 1427.7481 | -3.9  | 162   | 174 | 6  | 56.8  | 29 | T | RTNGQLAQLQQA        | Y | -1.0  | 11.04 |                          |
| 2   | P00772 ELA1 | 1 | 1443.6419 | 4.8   | 105   | 117 | 5  | 81.7  | 27 | V | VHPYWNTDDVAA        | Y | -0.5  | 3.88  |                          |
| 2   | P00772 ELA1 | 1 | 1485.6889 | -1.8  | 104   | 116 | 5  | 89.6  | 27 | I | VVHPYWNTDDVAA       | G | -0.2  | 3.88  |                          |
| 2   | P00772 ELA1 | 1 | 1529.7223 | -0.3  | 29    | 42  | 6  | 71.0  | 28 | V | GGTEAQRNSWPSQI      | S | -1.3  | 6.98  |                          |

| hit | accession       | z | mass      | ppm   | start | end | mc | score | id | - | sequence               | + | gravy | pl    | modification |
|-----|-----------------|---|-----------|-------|-------|-----|----|-------|----|---|------------------------|---|-------|-------|--------------|
| 2   | P00772 ELA1     | 1 | 1542.7103 | 6.3   | 104   | 117 | 6  | 103.0 | 28 | I | VVHPYWNTDDVAAG         | Y | -0.2  | 3.88  |              |
| 2   | P00772 ELA1     | 1 | 1586.878  | 2.0   | 130   | 144 | 8  | 127.6 | 25 | V | TLNSYVQLGVLPRAG        | T | 0.3   | 9.84  |              |
| 2   | P00772 ELA1     | 1 | 1590.8729 | -1.2  | 124   | 137 | 8  | 31.5  | 25 | L | RLAQSVTLNSYVQL         | G | 0.2   | 9.84  |              |
| 2   | P00772 ELA1     | 1 | 1712.8522 | -17.2 | 101   | 114 | 4  | 92.1  | 28 | V | QKIVVHPYWNTDDV         | A | -0.6  | 5.1   |              |
| 2   | P00772 ELA1     | 1 | 1815.8024 | -2.5  | 83    | 98  | 5  | 130.9 | 25 | V | VGEHNLNQNDGTEQYV       | G | -1.4  | 3.82  |              |
| 2   | P00772 ELA1     | 1 | 1905.8533 | -0.6  | 105   | 121 | 7  | 119.4 | 26 | V | VHPYWNTDDVAAGYDIA      | L | -0.3  | 3.6   |              |
| 2   | P00772 ELA1     | 1 | 1914.8708 | 1.0   | 82    | 98  | 6  | 132.9 | 26 | V | VGEHNLNQNDGTEQYV       | G | -1.0  | 3.82  |              |
| 2   | P00772 ELA1     | 1 | 1933.8847 | 9.8   | 104   | 120 | 7  | 65.5  | 27 | I | VVHPYWNTDDVAAGYDI      | A | -0.2  | 3.6   |              |
| 2   | P00772 ELA1     | 1 | 1971.8923 | 2.7   | 83    | 100 | 7  | 147.5 | 26 | V | VGEHNLNQNDGTEQYVGV     | Q | -1.0  | 3.82  |              |
| 2   | P00772 ELA1     | 1 | 2004.9218 | -0.4  | 104   | 121 | 8  | 144.5 | 26 | I | VVHPYWNTDDVAAGYDIA     | L | -0.1  | 3.6   |              |
| 2   | P00772 ELA1     | 1 | 2070.9607 | -2.5  | 82    | 100 | 8  | 154.5 | 26 | V | VVGEHNLNQNDGTEQYVGV    | Q | -0.7  | 3.82  |              |
| 2   | P00772 ELA1     | 1 | 2118.0058 | 2.6   | 104   | 122 | 9  | 34.4  | 26 | I | VVHPYWNTDDVAAGYDIAL    | L | 0.2   | 3.6   |              |
| 2   | P00772 ELA1     | 1 | 2317.1087 | 3.5   | 79    | 98  | 7  | 35.5  | 26 | T | FRVVVGEHNLNQNDGTEQYV   | G | -0.8  | 4.42  |              |
| 2   | P00772 ELA1     | 1 | 2341.1299 | -5.7  | 83    | 103 | 8  | 96.7  | 25 | V | VGEHNLNQNDGTEQYVGVQKI  | V | -1.0  | 4.42  |              |
| 2   | P00772 ELA1     | 1 | 2374.1594 | -0.3  | 101   | 121 | 9  | 130.5 | 26 | V | QKIVVHPYWNTDDVAAGYDIA  | L | -0.2  | 4.16  |              |
| 2   | P00772 ELA1     | 1 | 2440.1983 | 4.2   | 82    | 103 | 9  | 110.4 | 24 | V | VVGEHNLNQNDGTEQYVGVQKI | V | -0.8  | 4.42  |              |
| 2   | P00772 ELA1     | 1 | 2473.1986 | -6.8  | 79    | 100 | 9  | 27.3  | 24 | T | FRVVVGEHNLNQNDGTEQYVGV | Q | -0.5  | 4.42  |              |
| 3   | Q9HMMW9 Q9HMMW9 | 1 | 978.5287  | 8.2   | 636   | 643 | 1  | 55.1  | 27 | A | FHLQPPQL               | F | -0.4  | 7.84  |              |
| 3   | Q9HMMW9 Q9HMMW9 | 1 | 1166.6084 | -23.3 | 616   | 624 | 2  | 48.3  | 28 | A | YVINREQFV              | S | -0.1  | 6.88  |              |
| 3   | Q9HMMW9 Q9HMMW9 | 1 | 1212.6292 | 3.9   | 636   | 645 | 2  | 70.1  | 28 | A | FHLQPPQLFS             | D | -0.1  | 7.84  |              |
| 3   | Q9HMMW9 Q9HMMW9 | 1 | 1253.6404 | -2.8  | 616   | 625 | 3  | 49.8  | 28 | A | YVINREQFVS             | D | -0.1  | 6.88  |              |
| 3   | Q9HMMW9 Q9HMMW9 | 1 | 1367.618  | -8.8  | 133   | 143 | 1  | 37.8  | 26 | L | QYQSPTWKEMA            | N | -1.5  | 6.86  |              |
| 3   | Q9HMMW9 Q9HMMW9 | 1 | 1368.686  | -1.2  | 614   | 624 | 3  | 41.0  | 28 | A | MAYVINREQFV            | S | 0.3   | 6.88  |              |
| 3   | Q9HMMW9 Q9HMMW9 | 1 | 1441.7049 | -3.6  | 166   | 178 | 6  | 93.1  | 28 | S | SLLETTKQGEHEA          | F | -1.1  | 4.54  |              |
| 3   | Q9HMMW9 Q9HMMW9 | 1 | 1455.718  | -2.1  | 614   | 625 | 4  | 39.1  | 28 | A | MAYVINREQFVS           | D | 0.2   | 6.88  |              |
| 3   | Q9HMMW9 Q9HMMW9 | 1 | 1467.7358 | -1.0  | 616   | 627 | 4  | 38.3  | 28 | A | YVINREQFVSDV           | F | -0.1  | 4.08  |              |
| 3   | Q9HMMW9 Q9HMMW9 | 1 | 1506.6303 | -3.8  | 92    | 103 | 0  | 81.4  | 23 | T | DYQPPDFKYPYVG          | I | -1.9  | 3.6   |              |
| 3   | Q9HMMW9 Q9HMMW9 | 1 | 1567.7307 | -7.4  | 120   | 132 | 2  | 33.7  | 27 | A | GYGPDNKYELNWL          | Q | -1.2  | 4.08  |              |
| 3   | Q9HMMW9 Q9HMMW9 | 1 | 1619.7144 | -5.0  | 92    | 104 | 1  | 85.3  | 26 | T | DYQPPDFKYPYGI          | D | -1.4  | 3.6   |              |
| 3   | Q9HMMW9 Q9HMMW9 | 1 | 1695.7926 | -3.9  | 133   | 146 | 3  | 89.6  | 27 | L | QYQSPTWKEMANTI         | R | -1.1  | 6.86  |              |
| 3   | Q9HMMW9 Q9HMMW9 | 1 | 1736.8958 | 0.9   | 619   | 633 | 5  | 89.0  | 27 | I | NREQFVSDVFKGRGV        | G | -0.7  | 10.08 |              |
| 3   | Q9HMMW9 Q9HMMW9 | 1 | 1802.905  | -1.4  | 166   | 181 | 8  | 124.4 | 28 | S | SLLETTKQGEHEAFTL       | G | -0.5  | 4.54  |              |
| 3   | Q9HMMW9 Q9HMMW9 | 1 | 1857.9335 | -0.5  | 595   | 610 | 4  | 105.2 | 27 | I | DTYYVGFNMTKVPKPV       | R | -0.3  | 9.46  |              |
| 3   | Q9HMMW9 Q9HMMW9 | 1 | 1864.9544 | 0.1   | 619   | 635 | 7  | 92.1  | 27 | I | NREQFVSDVFKGRGVGA      | F | -0.5  | 10.08 |              |
| 3   | Q9HMMW9 Q9HMMW9 | 1 | 1880.7741 | -0.5  | 88    | 103 | 3  | 78.6  | 20 | T | GESTDYQPPDFKYPYVG      | I | -1.8  | 3.5   |              |
| 3   | Q9HMMW9 Q9HMMW9 | 1 | 1964.8316 | -1.5  | 92    | 107 | 2  | 120.4 | 22 | T | DYQPPDFKYPYGIDET       | K | -1.6  | 3.36  |              |
| 3   | Q9HMMW9 Q9HMMW9 | 1 | 1971.0176 | -5.5  | 594   | 610 | 5  | 53.8  | 27 | T | IDTYVGFNMTKVPKPV       | R | 0.0   | 9.46  |              |
| 3   | Q9HMMW9 Q9HMMW9 | 1 | 1987.9421 | -0.4  | 149   | 165 | 6  | 40.2  | 27 | A | RLEQAHIEMTINDANFS      | S | -0.5  | 4.42  |              |
| 3   | Q9HMMW9 Q9HMMW9 | 1 | 1993.8582 | 1.5   | 88    | 104 | 4  | 90.4  | 23 | T | GESTDYQPPDFKYPYGI      | D | -1.4  | 3.5   |              |
| 3   | Q9HMMW9 Q9HMMW9 | 1 | 2072.0653 | -8.3  | 593   | 610 | 6  | 36.7  | 26 | S | TIDTYVGFNMTKVPKPV      | R | -0.1  | 9.46  |              |

| hit | accession       | z | mass      | ppm   | start | end | mc | score | id | - | sequence                | + | gravy | pl   | modification  |
|-----|-----------------|---|-----------|-------|-------|-----|----|-------|----|---|-------------------------|---|-------|------|---------------|
| 3   | Q9HMMW9 Q9HMMW9 | 1 | 2112.1116 | 2.3   | 616   | 633 | 7  | 95.5  | 24 | A | YVINREQFVSDVFKGRGV      | G | -0.2  | 9.72 |               |
| 3   | Q9HMMW9 Q9HMMW9 | 1 | 2159.0973 | 0.5   | 592   | 610 | 7  | 39.7  | 26 | V | STIDTYVGFNMTKVKPKPV     | R | -0.1  | 9.46 |               |
| 3   | Q9HMMW9 Q9HMMW9 | 1 | 2240.1702 | -3.3  | 616   | 635 | 9  | 56.5  | 25 | A | YVINREQFVSDVFKGRGVGA    | F | -0.1  | 9.72 |               |
| 3   | Q9HMMW9 Q9HMMW9 | 1 | 2263.0321 | 3.4   | 92    | 110 | 4  | 35.0  | 26 | T | DYQPFDKYPYIGIDETKVA     | E | -1.2  | 3.76 |               |
| 3   | Q9HMMW9 Q9HMMW9 | 1 | 2314.1892 | -0.5  | 614   | 633 | 8  | 97.4  | 24 | A | MAYVINREQFVSDVFKGRGV    | G | 0.0   | 9.72 |               |
| 3   | Q9HMMW9 Q9HMMW9 | 1 | 2338.9754 | 7.7   | 88    | 107 | 5  | 98.9  | 20 | T | GESTDYQPFDKYPYIGIDET    | K | -1.6  | 3.32 |               |
| 3   | Q9HMMW9 Q9HMMW9 | 1 | 2637.1759 | 0.4   | 88    | 110 | 7  | 42.8  | 23 | T | GESTDYQPFDKYPYIGIDETKVA | E | -1.3  | 3.68 |               |
| 4   | Q9HR99 Q9HR99   | 1 | 1419.6154 | -3.6  | 122   | 134 | 6  | 65.3  | 25 | V | DAGETLEHTFETA           | G | -0.7  | 3.68 |               |
| 4   | Q9HR99 Q9HR99   | 1 | 1473.6195 | -5.4  | 106   | 119 | 5  | 75.8  | 23 | A | SGFGTMDKDGNGQFA         | V | -0.8  | 3.88 |               |
| 4   | Q9HR99 Q9HR99   | 1 | 1491.7246 | -7.0  | 57    | 70  | 4  | 84.6  | 29 | A | VAPDGGGFKFEPSEL         | T | -0.3  | 3.82 |               |
| 4   | Q9HR99 Q9HR99   | 1 | 1562.7617 | -5.1  | 56    | 70  | 5  | 78.5  | 29 | I | AVAPDGGGFKFEPSEL        | T | -0.1  | 3.82 |               |
| 4   | Q9HR99 Q9HR99   | 1 | 1651.7664 | 7.1   | 91    | 105 | 4  | 55.8  | 28 | S | AWPDMHDKISIPDGA         | S | -0.6  | 4.16 |               |
| 4   | Q9HR99 Q9HR99   | 1 | 1671.7563 | -1.6  | 106   | 121 | 7  | 133.1 | 26 | A | SGFGTMDKDGNGQFAVV       | D | -0.2  | 3.88 |               |
| 4   | Q9HR99 Q9HR99   | 1 | 1687.7512 | -4.7  | 106   | 121 | 7  | 54.8  | 25 | A | SGFGTMDKDGNGQFAVV       | D | -0.2  | 3.88 | Oxidation (M) |
| 4   | Q9HR99 Q9HR99   | 1 | 1691.8407 | 0.9   | 57    | 72  | 6  | 105.2 | 28 | A | VAPDGGGFKFEPSELTV       | S | 0.0   | 3.82 |               |
| 4   | Q9HR99 Q9HR99   | 1 | 1762.8778 | -3.5  | 56    | 72  | 7  | 119.1 | 28 | I | AVAPDGGGFKFEPSELTV      | S | 0.1   | 3.82 |               |
| 4   | Q9HR99 Q9HR99   | 1 | 1849.9098 | -1.5  | 56    | 73  | 8  | 31.7  | 28 | I | AVAPDGGGFKFEPSELTVS     | V | 0.0   | 3.82 |               |
| 4   | Q9HR99 Q9HR99   | 1 | 1869.7905 | -0.4  | 122   | 138 | 8  | 149.6 | 23 | V | DAGETLEHTFETAGEYT       | Y | -0.9  | 3.58 |               |
| 4   | Q9HR99 Q9HR99   | 1 | 2131.9222 | 7.6   | 122   | 140 | 9  | 152.5 | 24 | V | DAGETLEHTFETAGEYTYV     | C | -0.7  | 3.58 |               |
| 4   | Q9HR99 Q9HR99   | 1 | 2176.0007 | 11.1  | 86    | 105 | 7  | 118.8 | 26 | S | SHNVSAWPDMHDKISIPDGA    | S | -0.6  | 5.02 |               |
| 5   | Q9HMI3 Q9HMI3   | 1 | 1172.619  | -5.7  | 556   | 566 | 4  | 53.9  | 29 | V | GGPFLDRVELA             | - | 0.2   | 4.08 |               |
| 5   | Q9HMI3 Q9HMI3   | 1 | 1248.6615 | -3.7  | 181   | 190 | 1  | 32.1  | 28 | T | QQYAPFLRNL              | A | -0.6  | 9.84 |               |
| 5   | Q9HMI3 Q9HMI3   | 1 | 1319.6986 | -2.2  | 181   | 191 | 2  | 36.9  | 28 | T | QQYAPFLRNLA             | I | -0.4  | 9.84 |               |
| 5   | Q9HMI3 Q9HMI3   | 1 | 1358.7194 | -4.9  | 554   | 566 | 6  | 64.0  | 29 | T | SVGGPFLDRVELA           | - | 0.5   | 4.08 |               |
| 5   | Q9HMI3 Q9HMI3   | 1 | 1475.7157 | -0.9  | 390   | 402 | 3  | 61.1  | 29 | A | TFSNPRGYNPNI            | Q | -1.2  | 9.84 |               |
| 5   | Q9HMI3 Q9HMI3   | 1 | 1554.7103 | 1.4   | 237   | 250 | 5  | 45.1  | 27 | V | RLTAFDDYWGAPS           | V | -0.5  | 3.88 |               |
| 5   | Q9HMI3 Q9HMI3   | 1 | 1577.8202 | -2.9  | 178   | 190 | 3  | 59.0  | 28 | I | DLTQQYAPFLRNL           | A | -0.5  | 6.7  |               |
| 5   | Q9HMI3 Q9HMI3   | 1 | 1648.8573 | -5.1  | 178   | 191 | 4  | 50.7  | 28 | I | DLTQQYAPFLRNLA          | I | -0.3  | 6.7  |               |
| 5   | Q9HMI3 Q9HMI3   | 1 | 1696.8056 | -0.3  | 331   | 345 | 6  | 30.1  | 28 | I | NRDEIVDSIYQGFAA         | S | -0.3  | 3.7  |               |
| 5   | Q9HMI3 Q9HMI3   | 1 | 1793.8221 | 3.7   | 222   | 236 | 2  | 102.8 | 27 | T | GPFEFDQLDNETQRV         | R | -1.2  | 3.58 |               |
| 5   | Q9HMI3 Q9HMI3   | 1 | 1808.9309 | 17.6  | 78    | 93  | 7  | 102.9 | 26 | V | TNQIFDTLIQFKPGTS        | G | -0.3  | 6.76 |               |
| 5   | Q9HMI3 Q9HMI3   | 1 | 1951.8912 | 1.1   | 220   | 236 | 4  | 140.2 | 26 | V | GTGPFEFDQLDNETQRV       | R | -1.1  | 3.58 |               |
| 5   | Q9HMI3 Q9HMI3   | 1 | 1994.9585 | -4.4  | 460   | 477 | 6  | 89.1  | 27 | V | LLHPGTDIDDVPADQNYI      | A | -0.4  | 3.42 |               |
| 6   | Q48302 Q48302   | 1 | 904.5059  | -11.4 | 82    | 89  | 2  | 33.8  | 28 | V | VFVPTPF                 | - | 1.8   | 6.02 |               |
| 6   | Q48302 Q48302   | 1 | 908.4352  | -10.1 | 40    | 48  | 5  | 30.6  | 28 | A | GYAERGIGS               | A | -0.6  | 6.88 |               |
| 6   | Q48302 Q48302   | 1 | 979.4723  | -5.6  | 40    | 49  | 6  | 47.4  | 28 | A | GYAERGIGSA              | A | -0.3  | 6.88 |               |
| 6   | Q48302 Q48302   | 1 | 1012.5375 | -0.3  | 18    | 27  | 3  | 45.6  | 27 | S | NMPAITPKAA              | A | 0.1   | 10.1 |               |
| 6   | Q48302 Q48302   | 1 | 1050.5094 | 1.8   | 39    | 49  | 7  | 50.1  | 28 | A | AGYAERGIGSA             | A | -0.1  | 6.88 |               |
| 6   | Q48302 Q48302   | 1 | 1099.5695 | -3.4  | 17    | 27  | 4  | 54.8  | 29 | G | SNMPAITPKAA             | A | 0.0   | 10.1 |               |
| 6   | Q48302 Q48302   | 1 | 1149.5778 | -2.2  | 40    | 51  | 8  | 63.8  | 29 | A | GYAERGIGSAAV            | G | 0.2   | 6.88 |               |

| hit | accession     | z | mass      | ppm   | start | end | mc | score | id | - | sequence                    | + | gravy | pl   | modification             |
|-----|---------------|---|-----------|-------|-------|-----|----|-------|----|---|-----------------------------|---|-------|------|--------------------------|
| 6   | Q48302 Q48302 | 1 | 1156.591  | -1.7  | 16    | 27  | 5  | 54.2  | 29 | T | GSNMPAITPKAA                | A | -0.1  | 10.1 |                          |
| 6   | Q48302 Q48302 | 1 | 1163.5935 | 2.1   | 37    | 48  | 8  | 30.4  | 29 | A | LAAGYAERGIGS                | A | 0.2   | 6.88 |                          |
| 6   | Q48302 Q48302 | 1 | 1172.5859 | -0.9  | 16    | 27  | 5  | 31.8  | 29 | T | GSNMPAITPKAA                | A | -0.1  | 10.1 | Oxidation (M)            |
| 6   | Q48302 Q48302 | 1 | 1206.5993 | 0.7   | 40    | 52  | 9  | 38.1  | 29 | A | GYAERGIGSAAVG               | A | 0.2   | 6.88 |                          |
| 6   | Q48302 Q48302 | 1 | 1220.6149 | -4.8  | 39    | 51  | 9  | 54.4  | 29 | A | AGYAERGIGSAAV               | G | 0.4   | 6.88 |                          |
| 6   | Q48302 Q48302 | 1 | 1234.6306 | -0.8  | 36    | 48  | 9  | 60.9  | 29 | A | ALAAGYAERGIGS               | A | 0.3   | 6.88 |                          |
| 6   | Q48302 Q48302 | 1 | 1234.6306 | -2.8  | 37    | 49  | 9  | 68.2  | 29 | A | LAAGYAERGIGSA               | A | 0.3   | 6.88 |                          |
| 6   | Q48302 Q48302 | 1 | 1386.6813 | -1.9  | 14    | 27  | 6  | 47.5  | 29 | A | ETGSNMPAITPKAA              | A | -0.4  | 6.94 |                          |
| 6   | Q48302 Q48302 | 1 | 1457.7184 | -10.2 | 13    | 27  | 7  | 101.0 | 29 | L | AETGSNMPAITPKAA             | A | -0.2  | 6.94 |                          |
| 6   | Q48302 Q48302 | 1 | 1473.7133 | -1.8  | 13    | 27  | 7  | 38.4  | 29 | L | AETGSNMPAITPKAA             | A | -0.2  | 6.94 | Oxidation (M)            |
| 6   | Q48302 Q48302 | 1 | 1683.8865 | -3.9  | 11    | 27  | 9  | 110.4 | 27 | T | ILAETGSNMPAITPKAA           | A | 0.3   | 6.94 |                          |
| 6   | Q48302 Q48302 | 1 | 1699.8814 | 1.6   | 11    | 27  | 9  | 33.7  | 28 | T | ILAETGSNMPAITPKAA           | A | 0.3   | 6.94 | Oxidation (M)            |
| 7   | Q9HRQ9 Q9HRQ9 | 1 | 1398.6681 | -6.8  | 102   | 113 | 5  | 57.9  | 27 | V | KWVWEGSTGHN                 | H | -0.8  | 7.82 |                          |
| 7   | Q9HRQ9 Q9HRQ9 | 1 | 1497.7576 | -3.5  | 78    | 91  | 3  | 50.7  | 28 | T | VKVGPNQNVFDPA               | E | -0.6  | 6.76 |                          |
| 7   | Q9HRQ9 Q9HRQ9 | 1 | 1626.8002 | -1.5  | 79    | 93  | 3  | 90.2  | 28 | V | KVGPNNQNVFDPAEV             | Y | -0.8  | 4.08 |                          |
| 7   | Q9HRQ9 Q9HRQ9 | 1 | 1674.8148 | 0.5   | 175   | 191 | 5  | 100.5 | 29 | S | GGGGPVERSPHEMGVPI           | Q | -0.4  | 5.3  |                          |
| 7   | Q9HRQ9 Q9HRQ9 | 1 | 1707.8118 | 4.3   | 102   | 116 | 7  | 104.8 | 28 | V | KWVWEGSTGHN                 | S | -0.8  | 7.96 |                          |
| 7   | Q9HRQ9 Q9HRQ9 | 1 | 1725.8686 | -0.6  | 78    | 93  | 4  | 84.3  | 28 | T | VKVGPNQNVFDPAEV             | Y | -0.4  | 4.08 |                          |
| 7   | Q9HRQ9 Q9HRQ9 | 1 | 1873.9105 | -1.0  | 175   | 193 | 6  | 88.5  | 28 | S | GGGGPVERSPHEMGVPIQA         | H | -0.5  | 5.3  |                          |
| 7   | Q9HRQ9 Q9HRQ9 | 1 | 1955.0112 | 2.0   | 76    | 93  | 5  | 73.2  | 26 | T | KTVKVGPNQNVFDPAEV           | Y | -0.7  | 6.98 |                          |
| 7   | Q9HRQ9 Q9HRQ9 | 1 | 2306.0716 | -13.4 | 102   | 122 | 9  | 96.1  | 24 | V | KWVWEGSTGHN                 | G | -0.7  | 5.18 |                          |
| 7   | Q9HRQ9 Q9HRQ9 | 1 | 2445.1812 | 8.3   | 79    | 101 | 7  | 87.2  | 25 | V | KVGPNNQNVFDPAEVYVSPGDTV     | K | -0.5  | 3.7  |                          |
| 7   | Q9HRQ9 Q9HRQ9 | 1 | 2544.2497 | -4.2  | 78    | 101 | 8  | 47.9  | 24 | T | VKVGPNQNVFDPAEVYVSPGDTV     | K | -0.3  | 3.7  |                          |
| 8   | Q9HN93 Q9HN93 | 1 | 1239.5156 | -6.1  | 118   | 128 | 3  | 77.7  | 23 | A | DWGGHDPIENT                 | G | -1.5  | 3.7  |                          |
| 8   | Q9HN93 Q9HN93 | 1 | 1332.6099 | -2.1  | 98    | 108 | 4  | 38.4  | 28 | V | SFEWVSNTHNI                 | L | -0.5  | 5.12 |                          |
| 8   | Q9HN93 Q9HN93 | 1 | 1398.6528 | -0.8  | 206   | 217 | 2  | 39.5  | 27 | V | SYRRTAPDSS                  | G | -1.6  | 9.58 |                          |
| 8   | Q9HN93 Q9HN93 | 1 | 1440.5946 | -5.5  | 38    | 51  | 6  | 95.0  | 22 | A | QAYDGFSGDAKGG               | A | -0.9  | 3.88 | Gln->pyro-Glu (N-term Q) |
| 8   | Q9HN93 Q9HN93 | 1 | 1564.7481 | -6.4  | 103   | 117 | 7  | 51.3  | 28 | V | SNTHNILIDAQPDGA             | D | -0.5  | 3.88 |                          |
| 8   | Q9HN93 Q9HN93 | 1 | 1610.7002 | 1.7   | 38    | 53  | 8  | 96.9  | 26 | A | QAYDGFSGDAKGGAV             | G | -0.4  | 3.88 | Gln->pyro-Glu (N-term Q) |
| 8   | Q9HN93 Q9HN93 | 1 | 1667.7216 | 0.1   | 38    | 54  | 9  | 106.3 | 25 | A | QAYDGFSGDAKGGAVG            | N | -0.4  | 3.88 | Gln->pyro-Glu (N-term Q) |
| 8   | Q9HN93 Q9HN93 | 1 | 1711.7479 | -2.3  | 129   | 143 | 7  | 73.1  | 25 | T | GFTHTHTFDTEGVYT             | Y | -0.6  | 5.04 |                          |
| 8   | Q9HN93 Q9HN93 | 1 | 1761.737  | 6.6   | 240   | 254 | 3  | 54.0  | 24 | A | FEPDTELGHDEYDPV             | G | -1.3  | 3.38 |                          |
| 8   | Q9HN93 Q9HN93 | 1 | 2213.0389 | 4.4   | 98    | 117 | 9  | 147.7 | 26 | V | SFEWVSNTHNILIDAQPDGA        | D | -0.3  | 3.7  |                          |
| 8   | Q9HN93 Q9HN93 | 1 | 3444.5018 | -2.8  | 206   | 237 | 9  | 41.2  | 15 | V | SYRRTAPDSSGAFDYEPGGDQPAIPEA | D | -1.2  | 3.58 |                          |
| 9   | Q9HHN1 Q9HHN1 | 1 | 1534.6949 | 3.6   | 421   | 434 | 4  | 95.8  | 28 | S | EPMPWNSGGVFMA               | S | 0.3   | 3.3  |                          |
| 9   | Q9HHN1 Q9HHN1 | 1 | 1571.674  | -1.9  | 395   | 407 | 3  | 37.0  | 24 | T | FRDLNDEYDLG                 | S | -1.3  | 3.36 |                          |
| 9   | Q9HHN1 Q9HHN1 | 1 | 1585.7049 | 6.9   | 9     | 21  | 1  | 53.6  | 27 | S | YEDFDPEKRPSFG               | Q | -1.7  | 4.06 |                          |
| 9   | Q9HHN1 Q9HHN1 | 1 | 1803.7621 | 0.2   | 393   | 407 | 4  | 88.1  | 23 | G | MTFRDLNDEYDLG               | S | -1.1  | 3.36 |                          |
| 9   | Q9HHN1 Q9HHN1 | 1 | 2045.9728 | 5.2   | 411   | 428 | 7  | 81.0  | 27 | S | RTLEETGTVSEPMIPWNS          | G | -0.7  | 3.96 |                          |
| 9   | Q9HHN1 Q9HHN1 | 1 | 2090.9103 | 8.8   | 393   | 410 | 7  | 33.4  | 25 | G | MTFRDLNDEYDLG               | R | -0.8  | 3.36 |                          |

| hit | accession     | z | mass      | ppm   | start | end | mc | score | id | - | sequence                   | + | gravy | pl   | modification |
|-----|---------------|---|-----------|-------|-------|-----|----|-------|----|---|----------------------------|---|-------|------|--------------|
| 9   | Q9HHN1 Q9HHN1 | 1 | 2169.9889 | 9.9   | 389   | 407 | 6  | 49.3  | 26 | I | VIPGMTFRDLNDEYDL DGT       | S | -0.5  | 3.36 |              |
| 9   | Q9HHN1 Q9HHN1 | 1 | 2283.0729 | -4.8  | 388   | 407 | 7  | 59.9  | 25 | S | IVIPGMTFRDLNDEYDL DGT      | S | -0.3  | 3.36 |              |
| 9   | Q9HHN1 Q9HHN1 | 1 | 2430.1128 | 1.3   | 2     | 21  | 3  | 44.0  | 24 | M | VEFEPRSYEDFDPEKRPSFG       | Q | -1.5  | 4.12 |              |
| 9   | Q9HHN1 Q9HHN1 | 1 | 2907.2943 | 2.9   | 383   | 407 | 8  | 68.0  | 21 | A | DQYMSIVIPGMTFRDLNDEYDL DGT | S | -0.5  | 3.26 |              |
| 10  | Q9HRS0 Q9HRS0 | 1 | 1286.6156 | -0.9  | 119   | 129 | 4  | 52.0  | 29 | V | RFVWESGGHNV                | H | -0.5  | 7.84 |              |
| 10  | Q9HRS0 Q9HRS0 | 1 | 1327.6408 | -4.9  | 145   | 156 | 3  | 85.7  | 28 | T | DIAGPPKEYTHT               | F | -1.2  | 5.22 |              |
| 10  | Q9HRS0 Q9HRS0 | 1 | 1475.6067 | -1.2  | 219   | 230 | 3  | 64.6  | 22 | A | YFFMKYGGDYGE               | - | -0.7  | 4.08 |              |
| 10  | Q9HRS0 Q9HRS0 | 1 | 1478.7592 | -4.3  | 103   | 115 | 3  | 49.6  | 28 | S | NVFKPAEMYVKPG              | T | -0.4  | 9.62 |              |
| 10  | Q9HRS0 Q9HRS0 | 1 | 1595.7593 | 0.1   | 119   | 132 | 6  | 58.1  | 28 | V | RFVWESGGHNVHAT             | E | -0.6  | 8    |              |
| 10  | Q9HRS0 Q9HRS0 | 1 | 1917.8956 | -1.5  | 183   | 200 | 5  | 84.7  | 27 | V | TDSPPENKGYQTIVPDSA         | K | -1.1  | 3.7  |              |
| 10  | Q9HRS0 Q9HRS0 | 1 | 2147.0382 | -2.2  | 183   | 202 | 6  | 30.2  | 27 | V | TDSPPENKGYQTIVPDSAKT       | M | -1.3  | 4.3  |              |
| 10  | Q9HRS0 Q9HRS0 | 1 | 2344.1798 | 8.0   | 179   | 200 | 9  | 96.7  | 24 | G | TIIVTDSPENKGYQTIVPDSA      | K | -0.4  | 3.7  |              |
| 10  | Q9HRS0 Q9HRS0 | 1 | 2541.166  | 1.4   | 133   | 156 | 9  | 45.0  | 23 | T | EVPGDADWGVSTDIAGPPKEYTHT   | F | -0.8  | 3.84 |              |
| 10  | Q9HRS0 Q9HRS0 | 1 | 2570.1602 | -12.0 | 145   | 167 | 6  | 70.5  | 21 | T | DIAGPPKEYTHTFDGPTGEYNYV    | C | -1.0  | 4.06 |              |
| 11  | Q9HN95 Q9HN95 | 1 | 940.5018  | 5.1   | 454   | 463 | 3  | 65.8  | 27 | V | LAPGSPGFPV                 | - | 0.6   | 6.02 |              |
| 11  | Q9HN95 Q9HN95 | 1 | 1139.5764 | -7.2  | 31    | 40  | 2  | 75.7  | 28 | T | FYPPLQAHPA                 | F | -0.3  | 7.76 |              |
| 11  | Q9HN95 Q9HN95 | 1 | 1296.631  | 0.9   | 69    | 79  | 1  | 39.9  | 28 | A | DNPDERIPLQT                | F | -1.6  | 3.7  |              |
| 11  | Q9HN95 Q9HN95 | 1 | 1403.6874 | -2.0  | 29    | 40  | 3  | 42.0  | 29 | L | YTFYPPPLQAHPA              | F | -0.4  | 7.7  |              |
| 11  | Q9HN95 Q9HN95 | 1 | 1450.8224 | -0.3  | 140   | 151 | 5  | 44.5  | 24 | A | YLAWYTILPKLA               | G | 0.8   | 9.52 |              |
| 11  | Q9HN95 Q9HN95 | 1 | 1516.7714 | -4.5  | 28    | 40  | 4  | 87.6  | 29 | V | LYTFYPPPLQAHPA             | F | -0.1  | 7.7  |              |
| 11  | Q9HN95 Q9HN95 | 1 | 1729.8828 | -3.6  | 26    | 40  | 5  | 58.0  | 28 | A | NVLYTFYPPPLQAHPA           | F | 0.0   | 7.7  |              |
| 11  | Q9HN95 Q9HN95 | 1 | 2062.9901 | 1.4   | 176   | 193 | 6  | 62.7  | 27 | V | GFHHQYTDPGIAEGFKFI         | A | -0.4  | 6.02 |              |
| 12  | Q9HSA8 Q9HSA8 | 1 | 727.3289  | -10.0 | 61    | 66  | 1  | 30.7  | 25 | V | FGEYRG                     | L | -1.2  | 6.88 |              |
| 12  | Q9HSA8 Q9HSA8 | 1 | 927.445   | 2.6   | 59    | 66  | 3  | 41.1  | 27 | L | TVFGEYRG                   | L | -0.5  | 6.88 |              |
| 12  | Q9HSA8 Q9HSA8 | 1 | 953.4971  | 9.1   | 61    | 68  | 3  | 37.6  | 27 | V | FGEYRGLL                   | E | 0.0   | 6.88 |              |
| 12  | Q9HSA8 Q9HSA8 | 1 | 1236.6139 | 2.3   | 61    | 71  | 4  | 69.8  | 28 | V | FGEYRGLLEPG                | I | -0.5  | 4.26 |              |
| 12  | Q9HSA8 Q9HSA8 | 1 | 1274.5965 | 0.0   | 83    | 92  | 3  | 41.6  | 29 | T | YTFDMRTQTI                 | D | -0.6  | 6.7  |              |
| 12  | Q9HSA8 Q9HSA8 | 1 | 1335.6823 | -7.0  | 60    | 71  | 5  | 32.8  | 29 | T | VFGEYRGLLEPG               | I | -0.1  | 4.26 |              |
| 12  | Q9HSA8 Q9HSA8 | 1 | 2203.1677 | 2.0   | 61    | 80  | 8  | 119.1 | 23 | V | FGEYRGLLEPGINVIPIPFVS      | R | 0.4   | 4.26 |              |
| 13  | Q9HM69 CSG    | 1 | 1664.7529 | 2.9   | 598   | 611 | 4  | 65.0  | 27 | T | FDEEDIDISELRQG             | S | -1.0  | 3.38 |              |
| 13  | Q9HM69 CSG    | 1 | 1909.8541 | 9.4   | 598   | 614 | 7  | 43.8  | 27 | T | FDEEDIDISELRQGSAS          | A | -0.8  | 3.38 |              |
| 13  | Q9HM69 CSG    | 1 | 2265.9986 | 2.5   | 751   | 770 | 7  | 57.3  | 24 | G | NYTVEADDGDNTDRQNVEIV       | E | -1.2  | 3.32 |              |
| 13  | Q9HM69 CSG    | 1 | 2384.0139 | 2.4   | 591   | 611 | 8  | 92.1  | 21 | I | SVSDDTFDEEDIDISELRQG       | S | -1.1  | 3.12 |              |
| 13  | Q9HM69 CSG    | 1 | 2637.1678 | 2.3   | 751   | 773 | 8  | 27.0  | 22 | G | NYTVEADDGDNTDRQNVEIVEEL    | E | -1.2  | 3.24 |              |
| 13  | Q9HM69 CSG    | 1 | 2762.2267 | 6.9   | 746   | 770 | 9  | 24.5  | 21 | S | NVEPGNYTVEADDGDNTDRQNVEIV  | E | -1.1  | 3.28 |              |
| 14  | Q9HRL3 Q9HRL3 | 1 | 1103.5651 | -7.9  | 586   | 595 | 3  | 62.8  | 30 | A | WLLYSGPAPT                 | K | 0.2   | 5.92 |              |
| 14  | Q9HRL3 Q9HRL3 | 1 | 1311.6169 | 2.4   | 274   | 285 | 1  | 77.5  | 28 | T | WLPDAMEGPTPV               | S | -0.2  | 3    |              |
| 14  | Q9HRL3 Q9HRL3 | 1 | 1749.7707 | -1.9  | 478   | 493 | 5  | 29.3  | 25 | T | FHGEPRSDTAEDPHGV           | R | -1.4  | 4.52 |              |
| 14  | Q9HRL3 Q9HRL3 | 1 | 1876.9472 | -3.7  | 524   | 540 | 8  | 87.9  | 28 | T | GLHIEFLHTWLAGPEGT          | A | 0.1   | 5.12 |              |
| 14  | Q9HRL3 Q9HRL3 | 1 | 1977.9949 | -19.5 | 523   | 540 | 9  | 105.1 | 27 | A | TGLHIEFLHTWLAGPEGT         | A | 0.1   | 5.12 |              |

| hit | accession       | z | mass      | ppm  | start | end | mc | score | id | - | sequence                 | + | gravy | pl    | modification |
|-----|-----------------|---|-----------|------|-------|-----|----|-------|----|---|--------------------------|---|-------|-------|--------------|
| 14  | Q9HRL3 Q9HRL3   | 1 | 2106.0245 | -4.6 | 267   | 285 | 4  | 41.3  | 27 | S | AQFPLHTWLPDAMEGPTPV      | S | -0.1  | 4.06  |              |
| 15  | Q9HND8 VATI     | 1 | 1332.631  | -3.1 | 364   | 374 | 2  | 44.7  | 28 | I | NRPQYTEIDPT              | V | -1.8  | 4.08  |              |
| 15  | Q9HND8 VATI     | 1 | 1445.715  | -3.9 | 363   | 374 | 3  | 52.3  | 29 | V | INRPQYTEIDPT             | V | -1.3  | 4.08  |              |
| 15  | Q9HND8 VATI     | 1 | 1530.7678 | -4.5 | 364   | 376 | 4  | 44.1  | 29 | I | NRPQYTEIDPTVV            | L | -0.9  | 4.08  |              |
| 15  | Q9HND8 VATI     | 1 | 1673.826  | -1.1 | 361   | 374 | 4  | 73.3  | 28 | T | EVINRPQYTEIDPT           | V | -1.1  | 3.82  |              |
| 15  | Q9HND8 VATI     | 1 | 1871.9629 | -2.7 | 361   | 376 | 6  | 82.0  | 28 | T | EVINRPQYTEIDPTVV         | L | -0.4  | 3.82  |              |
| 15  | Q9HND8 VATI     | 1 | 2086.0946 | -5.8 | 359   | 376 | 8  | 48.6  | 26 | S | LTEVINRPQYTEIDPTVV       | L | -0.2  | 3.82  |              |
| 16  | Q9HRL1 Q9HRL1   | 1 | 1517.7878 | -0.8 | 335   | 347 | 7  | 52.8  | 28 | I | NSALSIFYYSRVV            | K | 0.6   | 9.58  |              |
| 16  | Q9HRL1 Q9HRL1   | 1 | 1557.7675 | -1.6 | 350   | 362 | 5  | 33.1  | 29 | A | LWIEDPRDDL SLS           | G | -0.5  | 3.5   |              |
| 16  | Q9HRL1 Q9HRL1   | 1 | 1940.948  | -0.6 | 350   | 366 | 7  | 58.2  | 27 | A | LWIEDPRDDL SLSGQPT       | G | -0.8  | 3.5   |              |
| 16  | Q9HRL1 Q9HRL1   | 1 | 2070.984  | -2.2 | 131   | 149 | 3  | 52.4  | 27 | A | SVPFHFWAPEAYEGAPAPV      | S | 0.1   | 4.24  |              |
| 16  | Q9HRL1 Q9HRL1   | 1 | 2142.0211 | -0.8 | 130   | 149 | 4  | 134.1 | 26 | T | ASVPFHFWAPEAYEGAPAPV     | S | 0.2   | 4.24  |              |
| 17  | Q9HMF1 Q9HMF1   | 1 | 1198.5982 | -7.7 | 160   | 169 | 2  | 71.4  | 28 | V | RLEGELPEWA               | T | -0.9  | 3.96  |              |
| 17  | Q9HMF1 Q9HMF1   | 1 | 1411.7095 | -0.6 | 158   | 169 | 3  | 70.8  | 28 | V | NVRLEGELPEWA             | T | -0.7  | 3.96  |              |
| 17  | Q9HMF1 Q9HMF1   | 1 | 1664.7682 | -3.6 | 222   | 235 | 5  | 27.2  | 27 | S | SIFPTDDRTEDWLA           | R | -0.7  | 3.5   |              |
| 17  | Q9HMF1 Q9HMF1   | 1 | 1832.9156 | 1.6  | 192   | 208 | 7  | 30.5  | 28 | V | LEYTGPGVESLSVPERT        | T | -0.4  | 3.96  |              |
| 17  | Q9HMF1 Q9HMF1   | 1 | 2193.0073 | 1.6  | 581   | 599 | 7  | 52.7  | 26 | L | NIDEETYARIEQGDDVEVV      | D | -0.8  | 3.32  |              |
| 18  | Q9HRR0 Q9HRR0   | 1 | 1333.6051 | 3.3  | 7     | 17  | 2  | 55.2  | 28 | S | NYGDIHRYEPA              | S | -1.5  | 5.22  |              |
| 18  | Q9HRR0 Q9HRR0   | 1 | 1420.6371 | 0.4  | 6     | 17  | 3  | 72.0  | 27 | G | SNYGDIHRYEPA             | S | -1.4  | 5.22  |              |
| 18  | Q9HRR0 Q9HRR0   | 1 | 1459.6653 | 1.0  | 109   | 120 | 3  | 64.1  | 28 | T | SMFENTVEQFKT             | A | -0.7  | 4.26  |              |
| 18  | Q9HRR0 Q9HRR0   | 1 | 1530.7024 | 3.9  | 109   | 121 | 4  | 78.9  | 28 | T | SMFENTVEQFKTA            | L | -0.5  | 4.26  |              |
| 19  | Q9HMMW4 Q9HMMW4 | 1 | 1578.7467 | -1.8 | 402   | 415 | 2  | 47.1  | 28 | T | LHPTWGPYAPENPT           | T | -1.1  | 5.12  |              |
| 19  | Q9HMMW4 Q9HMMW4 | 1 | 2202.097  | -6.2 | 252   | 270 | 6  | 37.0  | 26 | A | AFNGNLGPWDLKRWSQQSV      | M | -0.8  | 10.08 |              |
| 19  | Q9HMMW4 Q9HMMW4 | 1 | 2393.0692 | -0.8 | 231   | 251 | 6  | 72.2  | 23 | A | KPYVEAEDADGLEQDEEVMRA    | A | -1.1  | 3.62  |              |
| 19  | Q9HMMW4 Q9HMMW4 | 1 | 2577.1904 | -5.4 | 229   | 251 | 8  | 35.5  | 23 | A | LAKPYVEAEDADGLEQDEEVMRA  | A | -0.8  | 3.62  |              |
| 20  | Q9HMT7 Q9HMT7   | 1 | 1702.7322 | -0.9 | 44    | 59  | 6  | 127.6 | 24 | V | DVDTEAYEESHAPGAI         | G | -0.7  | 3.5   |              |
| 20  | Q9HMT7 Q9HMT7   | 1 | 2369.1751 | 4.1  | 178   | 199 | 8  | 64.7  | 25 | L | VDVRSPEEFSGEILAPPLQET    | A | -0.4  | 3.58  |              |
| 20  | Q9HMT7 Q9HMT7   | 1 | 2564.0074 | 4.8  | 126   | 147 | 5  | 66.1  | 16 | L | DGGRDYWMDNDYPTSEPPSFS    | A | -1.7  | 3.32  |              |
| 21  | Q9HMG3 Q9HMG3   | 1 | 1037.5254 | 8.9  | 35    | 43  | 3  | 48.2  | 27 | I | AQDVLEHRA                | S | -0.7  | 5.22  |              |
| 21  | Q9HMG3 Q9HMG3   | 1 | 1737.7846 | -1.0 | 44    | 58  | 3  | 117.7 | 26 | A | STVPETDFPEPYNRS          | I | -1.4  | 3.82  |              |
| 21  | Q9HMG3 Q9HMG3   | 1 | 1874.9486 | -9.3 | 27    | 43  | 6  | 28.8  | 28 | S | SKPPAEDIAQDVLEHRA        | S | -0.9  | 4.54  |              |
| 21  | Q9HMG3 Q9HMG3   | 1 | 2757.2994 | -6.9 | 35    | 58  | 7  | 46.0  | 22 | I | AQDVLEHRASTVPETDFPEPYNRS | I | -1.1  | 4.28  |              |
| 22  | Q9HNL7 Q9HNL7   | 1 | 1752.9199 | -8.0 | 9     | 23  | 4  | 48.7  | 27 | G | SLFGVPYNFERPKLS          | A | -0.3  | 9.72  |              |
| 22  | Q9HNL7 Q9HNL7   | 1 | 1920.9444 | 0.0  | 28    | 44  | 6  | 84.2  | 28 | S | AYWQPGEGLVEKPFGI         | G | -0.1  | 4.26  |              |
| 22  | Q9HNL7 Q9HNL7   | 1 | 2451.2798 | 2.9  | 2     | 23  | 8  | 101.7 | 22 | M | VEKPTSGSLFGVPYNFERPKLS   | A | -0.5  | 9.62  |              |
| 23  | Q9HHP3 Q9HHP3   | 1 | 1600.7594 | -3.8 | 228   | 241 | 5  | 50.5  | 28 | A | AVDPESGDQVWRRS           | L | -1.2  | 4.3   |              |
| 23  | Q9HHP3 Q9HHP3   | 1 | 1671.7965 | -2.1 | 227   | 241 | 6  | 38.2  | 28 | V | AAVDPESGDQVWRRS          | L | -1.0  | 4.3   |              |
| 23  | Q9HHP3 Q9HHP3   | 1 | 1911.8599 | 3.6  | 111   | 126 | 6  | 85.4  | 26 | T | SFDINENTRSWNVETT         | G | -1.2  | 3.82  |              |
| 24  | Q9HSS1 Q9HSS1   | 1 | 940.4866  | -2.6 | 249   | 258 | 5  | 35.7  | 26 | A | LAGALEDGPV               | S | 0.6   | 3     |              |
| 24  | Q9HSS1 Q9HSS1   | 1 | 1207.635  | -3.4 | 153   | 164 | 7  | 75.4  | 28 | V | GFVGFGEIARGV             | A | 0.9   | 6.98  |              |

| hit | accession     | z | mass      | ppm   | start | end | mc | score | id | - | sequence                 | + | gravy | pl    | modification  |
|-----|---------------|---|-----------|-------|-------|-----|----|-------|----|---|--------------------------|---|-------|-------|---------------|
| 24  | Q9HSS1 Q9HSS1 | 1 | 1232.6401 | -6.0  | 210   | 220 | 4  | 42.6  | 29 | V | FAPLTEETRGL              | V | -0.2  | 4.26  |               |
| 24  | Q9HSS1 Q9HSS1 | 1 | 1646.8152 | -2.7  | 210   | 224 | 6  | 37.1  | 29 | V | FAPLTEETRGLVDEA          | A | -0.2  | 3.68  |               |
| 25  | Q9HQP2 Q9HQP2 | 1 | 731.4582  | -6.0  | 155   | 161 | 5  | 24.0  | 22 | G | LFGAVIL                  | G | 2.9   | 6.02  |               |
| 25  | Q9HQP2 Q9HQP2 | 1 | 1263.6976 | -0.5  | 162   | 172 | 4  | 38.8  | 26 | L | GLLPGYFLQRT              | L | 0.2   | 9.84  |               |
| 25  | Q9HQP2 Q9HQP2 | 1 | 1269.5778 | -19.5 | 208   | 217 | 2  | 32.1  | 25 | V | FEQFRAWDAT               | G | -0.7  | 4.08  |               |
| 25  | Q9HQP2 Q9HQP2 | 1 | 2104.9491 | 0.6   | 746   | 763 | 4  | 27.0  | 25 | V | VFYDGPRDLSQGDYFQQA       | Y | -0.9  | 3.6   |               |
| 26  | Q9HQP4 Q9HQP4 | 1 | 1538.7577 | -1.6  | 102   | 116 | 5  | 93.5  | 28 | A | TEDGDPSVPGPIVRT          | E | -0.7  | 3.7   |               |
| 26  | Q9HQP4 Q9HQP4 | 1 | 2168.9797 | 0.8   | 226   | 244 | 5  | 33.1  | 25 | S | MAGEDVDYSPRTRNPVFT       | V | -1.0  | 3.96  |               |
| 26  | Q9HQP4 Q9HQP4 | 1 | 2539.1926 | 0.4   | 102   | 125 | 9  | 57.1  | 24 | A | TEDGDPSVPGPIVRTEEGQDIEVT | L | -0.8  | 3.32  |               |
| 27  | Q9HRL8 Q9HRL8 | 1 | 1015.5603 | 2.3   | 170   | 178 | 3  | 32.2  | 29 | A | GVRIPAWFA                | F | 0.9   | 11.04 |               |
| 27  | Q9HRL8 Q9HRL8 | 1 | 1243.5833 | 2.0   | 198   | 208 | 0  | 51.5  | 28 | G | RNPFDTPEAPT              | E | -1.5  | 4.08  |               |
| 27  | Q9HRL8 Q9HRL8 | 1 | 1826.8799 | -5.1  | 192   | 208 | 4  | 64.0  | 28 | A | NLAEVGRNPFDTPEAPT        | E | -0.8  | 3.82  |               |
| 28  | Q9HMX1 Q9HMX1 | 1 | 1760.8329 | -1.8  | 111   | 126 | 5  | 53.3  | 28 | L | SRDVIPNQGYNDPSTV         | R | -1.0  | 3.88  |               |
| 28  | Q9HMX1 Q9HMX1 | 1 | 1972.9023 | -1.1  | 285   | 302 | 7  | 31.0  | 26 | G | TLPNGRDLFTYMMGGAET       | T | -0.3  | 4.08  |               |
| 28  | Q9HMX1 Q9HMX1 | 1 | 1987.0011 | 1.2   | 109   | 126 | 7  | 61.7  | 27 | T | LLSRDVIPNQGYNDPSTV       | R | -0.5  | 3.88  |               |
| 29  | Q9HS12 Q9HS12 | 1 | 731.4694  | -15.4 | 23    | 28  | 3  | 32.0  | 22 | V | FRALLL                   | A | 1.9   | 11.04 |               |
| 29  | Q9HS12 Q9HS12 | 1 | 876.4263  | 24.2  | 511   | 518 | 4  | 48.2  | 29 | S | ETVTAMPL                 | Q | 0.7   | 3.3   | Oxidation (M) |
| 29  | Q9HS12 Q9HS12 | 1 | 974.5913  | 5.0   | 23    | 31  | 6  | 35.6  | 22 | V | FRALLLAAT                | L | 1.6   | 11.04 |               |
| 30  | Q9HMX0 Q9HMX0 | 1 | 1880.9785 | 2.3   | 188   | 205 | 8  | 36.1  | 27 | S | NALQHILFSGIDPFAGVPV      | L | 0.6   | 4.94  |               |
| 30  | Q9HMX0 Q9HMX0 | 1 | 1968.0105 | 2.3   | 187   | 205 | 9  | 78.8  | 26 | T | SNALQHILFSGIDPFAGVPV     | L | 0.5   | 4.94  |               |
| 31  | Q9HR04 Q9HR04 | 1 | 1239.6248 | -3.4  | 76    | 87  | 7  | 29.9  | 28 | S | IYLGEGEGGRYV             | A | 0.0   | 6.82  |               |
| 31  | Q9HR04 Q9HR04 | 1 | 1950.8344 | -1.3  | 94    | 109 | 4  | 60.9  | 23 | I | NQYYDDFSATQQTQRS         | S | -1.9  | 3.88  |               |
| 32  | Q9HP48 Q9HP48 | 1 | 1821.7694 | 6.5   | 204   | 220 | 7  | 74.7  | 24 | V | FESGVDHFEVDDDGALA        | A | -0.3  | 3.32  |               |
| 32  | Q9HP48 Q9HP48 | 1 | 1892.8065 | 2.0   | 204   | 221 | 8  | 53.6  | 24 | V | FESGVDHFEVDDDGALAA       | A | -0.1  | 3.32  |               |
| 33  | Q9HMH4 Q9HMH4 | 1 | 1344.5358 | 5.1   | 56    | 67  | 4  | 53.9  | 22 | A | SFSYDDPDADTL             | G | -0.9  | 2.74  |               |
| 33  | Q9HMH4 Q9HMH4 | 1 | 1773.7006 | 5.0   | 56    | 71  | 6  | 101.6 | 19 | A | SFSYDDPDADTLGWEG         | G | -1.0  | 2.72  |               |
| 34  | Q9HRR1 Q9HRR1 | 1 | 1544.7583 | -5.9  | 177   | 189 | 4  | 30.5  | 29 | A | TWRSQNTDNTIPI            | L | -1.1  | 6.78  |               |
| 34  | Q9HRR1 Q9HRR1 | 1 | 2719.1198 | 13.6  | 151   | 174 | 7  | 124.0 | 19 | V | NIDEFDDYDTWENDYGDAGIGKPA | K | -1.3  | 3.16  |               |
| 35  | Q9HNY2 Q9HNY2 | 1 | 1026.5458 | 18.7  | 233   | 243 | 6  | 29.1  | 27 | T | VPGADASALRA              | G | 0.4   | 6.78  |               |
| 35  | Q9HNY2 Q9HNY2 | 1 | 1126.6234 | -16.4 | 230   | 241 | 8  | 29.2  | 27 | A | LITVPGADASAL             | R | 1.2   | 3.1   |               |
| 36  | Q9HPG8 Q9HPG8 | 1 | 1317.6241 | 0.8   | 661   | 670 | 2  | 67.9  | 29 | V | EFDDYFLRTL               | E | -0.4  | 3.7   |               |
| 37  | Q9HM85 EF2    | 1 | 1379.8024 | -3.0  | 614   | 625 | 6  | 38.8  | 23 | A | LIDADIRLLEPI             | Q | 0.8   | 3.7   |               |
| 37  | Q9HM85 EF2    | 1 | 1786.8407 | 18.2  | 155   | 169 | 3  | 67.9  | 28 | I | SELQEGPEEMQERLL          | S | -1.2  | 3.68  |               |
| 38  | Q9HM89 EF1A   | 1 | 1521.71   | -5.7  | 165   | 178 | 4  | 50.6  | 28 | V | KDLFGQVGFNPDDA           | K | -0.6  | 3.6   |               |
| 38  | Q9HM89 EF1A   | 1 | 1764.8319 | 2.8   | 162   | 178 | 7  | 87.0  | 28 | V | SGVKDLFGQVGFNPDDA        | K | -0.3  | 3.6   |               |
| 39  | Q9HNS6 Q9HNS6 | 1 | 1063.5815 | 10.7  | 71    | 81  | 4  | 30.2  | 26 | I | GFGPIVGPHIA              | F | 0.9   | 7.84  |               |
| 39  | Q9HNS6 Q9HNS6 | 1 | 1361.7456 | -5.9  | 68    | 81  | 6  | 98.4  | 27 | T | NAIGFGPIVGPHIA           | F | 0.9   | 7.84  |               |
| 40  | Q9HP84 HTR4   | 1 | 731.4582  | -4.6  | 324   | 330 | 5  | 29.2  | 22 | T | GILGFIL                  | V | 2.7   | 6.02  |               |
| 41  | Q9HMS7 Q9HMS7 | 1 | 1167.5924 | -8.2  | 363   | 372 | 3  | 29.3  | 28 | S | AFTPERFSLT               | V | -0.1  | 6.98  |               |
| 43  | Q9HT00 GLMS   | 1 | 930.4658  | 10.2  | 537   | 546 | 7  | 51.2  | 30 | G | ADVIGLASDA               | G | 1.0   | 2.92  |               |



| hit | accession       | z | mass      | ppm   | start | end | mc | score | id | - | sequence             | + | gravy | pI    | modification             |
|-----|-----------------|---|-----------|-------|-------|-----|----|-------|----|---|----------------------|---|-------|-------|--------------------------|
| 45  | Q9HP88 Q9HP88   | 1 | 1498.7126 | 0.7   | 171   | 183 | 4  | 77.5  | 28 | T | AFRDYASTDMLPL        | A | 0.0   | 3.88  |                          |
| 45  | Q9HP88 Q9HP88   | 1 | 1689.9301 | -2.5  | 397   | 412 | 5  | 55.1  | 25 | I | LLPIAPGLDDTPEIRA     | Q | 0.2   | 3.7   |                          |
| 47  | Q9HRL2 Q9HRL2   | 1 | 1401.7041 | -7.1  | 244   | 256 | 2  | 78.2  | 29 | T | WLPDAHVQAPTPA        | S | -0.2  | 4.94  |                          |
| 48  | Q9HMB4 Q9HMB4   | 1 | 1621.8141 | 1.0   | 448   | 461 | 1  | 57.5  | 28 | A | EFIRDYVPFVPGPS       | A | 0.0   | 4.08  |                          |
| 49  | Q9HNN6 Q9HNN6   | 1 | 2021.8926 | -4.7  | 163   | 181 | 7  | 39.0  | 24 | G | AFVEPDQDSQADADRGSKS  | R | -1.3  | 3.76  |                          |
| 50  | Q9HPB1 SECY     | 1 | 1135.5696 | -0.9  | 421   | 429 | 1  | 47.3  | 29 | V | MERYIPQVT            | V | -0.5  | 6.88  |                          |
| 52  | Q9HPQ2 Q9HPQ2   | 1 | 1402.6517 | -0.1  | 332   | 343 | 4  | 71.1  | 28 | A | YVVDNYGYSRPA         | T | -0.7  | 6.58  |                          |
| 54  | Q9HS26 Q9HS26   | 1 | 1711.7577 | 2.6   | 16    | 31  | 6  | 55.7  | 26 | A | GDDSEPEIDFYGGKLA     | S | -0.8  | 3.42  |                          |
| 56  | Q9HMU6 Q9HMU6   | 1 | 1231.6098 | -6.7  | 114   | 124 | 1  | 46.9  | 30 | V | GDSPPRWHAPL          | L | -1.1  | 7.84  |                          |
| 57  | Q9HRJ5 Q9HRJ5   | 1 | 1243.6561 | -15.1 | 96    | 106 | 5  | 36.8  | 30 | A | TTPLSRAEWLA          | A | -0.1  | 6.98  |                          |
| 58  | Q9HR32 TOP6A    | 1 | 1459.7154 | 9.7   | 7     | 19  | 6  | 34.2  | 29 | T | SDETEARDQLLAI        | A | -0.6  | 3.58  |                          |
| 58  | Q9HR32 TOP6A    | 1 | 2300.0419 | 2.5   | 20    | 39  | 4  | 44.0  | 24 | I | AEQFYDQFADGDIPRMSLPT | R | -0.6  | 3.5   |                          |
| 59  | Q9HQQ9 Q9HQQ9   | 1 | 2003.9622 | -1.7  | 350   | 367 | 6  | 32.8  | 27 | V | AYDPVAAEKMAEQRPEVT   | Y | -0.8  | 4.16  |                          |
| 60  | Q9HSM2 MUTS1    | 1 | 1156.6088 | 1.1   | 328   | 338 | 6  | 29.4  | 29 | A | RDALGDVLEI           | Y | 0.2   | 3.7   |                          |
| 61  | Q9HMU8 Q9HMU8   | 1 | 1186.671  | -7.0  | 47    | 56  | 4  | 79.6  | 27 | I | NILLDFVRPT           | T | 0.5   | 6.78  |                          |
| 62  | Q9HMZ3 Q9HMZ3   | 1 | 2517.1237 | 3.8   | 413   | 432 | 5  | 53.9  | 23 | V | EYLWYVGDYPSYDERNQHIA | R | -1.2  | 4.06  |                          |
| 63  | Q9HSM4 DHE42    | 1 | 1255.6925 | -3.7  | 241   | 251 | 6  | 57.3  | 28 | A | LLLDDWGARVV          | A | 0.8   | 3.88  |                          |
| 66  | Q9HHR4 Q9HHR4   | 1 | 1340.818  | -0.9  | 235   | 247 | 8  | 24.3  | 20 | A | LIGVGYIIGPRIA        | A | 1.5   | 9.84  |                          |
| 68  | Q9HN92 Q9HN92   | 1 | 955.5273  | -2.9  | 1     | 8   | 2  | 42.7  | 28 | - | MNVRPQVI             | A | 0.2   | 11.04 |                          |
| 68  | Q9HN92 Q9HN92   | 1 | 971.5222  | -5.1  | 1     | 8   | 2  | 30.3  | 30 | - | MNVRPQVI             | A | 0.2   | 11.04 | Oxidation (M)            |
| 68  | Q9HN92 Q9HN92   | 1 | 1026.5644 | 0.6   | 1     | 9   | 3  | 55.2  | 27 | - | MNVRPQVIA            | T | 0.4   | 11.04 |                          |
| 69  | Q9HNNW7 Q9HNNW7 | 1 | 1582.7086 | 1.7   | 235   | 248 | 4  | 59.8  | 27 | L | MFQGLEGYDDVRPG       | S | -0.7  | 3.7   |                          |
| 70  | Q9HSJ6 Q9HSJ6   | 1 | 986.6165  | 8.4   | 160   | 169 | 8  | 20.8  | 20 | G | IVGAFVLIVG           | G | 2.9   | 6.02  |                          |
| 72  | P16102 BACH     | 1 | 962.5338  | 4.1   | 156   | 163 | 4  | 29.4  | 27 | T | SALLFRWA             | F | 1.0   | 11.04 |                          |
| 72  | P16102 BACH     | 1 | 1220.6401 | -1.6  | 191   | 201 | 6  | 33.8  | 28 | A | GTAEIFDTRLV          | L | 0.3   | 4.08  |                          |
| 74  | Q9HHI2 Q9HHI2   | 1 | 731.4582  | -6.0  | 40    | 46  | 5  | 24.0  | 22 | L | IVFGAIL              | L | 3.0   | 6.02  |                          |
| 74  | Q9HHI2 Q9HHI2   | 1 | 731.4582  | -4.6  | 41    | 47  | 5  | 24.1  | 22 | I | VFGAILL              | M | 2.9   | 6.02  |                          |
| 76  | Q9HRS4 Q9HRS4   | 1 | 2054.809  | 6.7   | 16    | 35  | 9  | 81.0  | 18 | A | AADQGIDPWTADDHEGGDGE | - | -1.3  | 3.22  |                          |
| 77  | Q9HRS9 Q9HRS9   | 1 | 1311.6533 | -25.4 | 184   | 195 | 2  | 51.5  | 28 | S | WLPDAMVAPTPV         | S | 0.7   | 3.1   | Oxidation (M)            |
| 80  | Q9HS72 SECE     | 1 | 1605.8436 | -1.7  | 1     | 14  | 6  | 33.3  | 27 | - | MDVPLELSAYTRVL       | R | 0.5   | 4.08  |                          |
| 81  | Q9HNR0 Q9HNR0   | 1 | 1097.4989 | 27.8  | 38    | 48  | 5  | 40.0  | 28 | G | QQAATGDPTNL          | N | -0.9  | 3.1   | Gln->pyro-Glu (N-term Q) |
| 84  | Q9HQ64 Q9HQ64   | 1 | 1716.8907 | -1.9  | 79    | 94  | 7  | 71.3  | 28 | V | YNALVNQGIENAKRA      | A | -0.6  | 9.72  |                          |
| 85  | Q9HS86 Q9HS86   | 1 | 1261.5939 | -0.5  | 95    | 106 | 4  | 42.6  | 29 | I | AAGEFERADIPS         | S | -0.4  | 3.82  |                          |
| 87  | Q9HPA9 Q9HPA9   | 1 | 930.4771  | -2.6  | 509   | 518 | 7  | 31.6  | 30 | A | QGNVGLSSGI           | T | 0.3   | 6.02  |                          |
| 93  | Q9HNQ9 Q9HNQ9   | 1 | 1122.5094 | 7.9   | 209   | 218 | 4  | 44.0  | 28 | S | GGFWESVDRA           | M | -0.5  | 4.08  |                          |
| 96  | Q9HNK1 Q9HNK1   | 1 | 762.4276  | -28.7 | 116   | 123 | 6  | 32.9  | 29 | A | AIALFGTA             | I | 1.9   | 6.02  |                          |
| 97  | Q9HN02 Q9HN02   | 1 | 1096.5917 | -0.8  | 163   | 171 | 4  | 52.0  | 26 | V | LFDYLTRAV            | N | 0.7   | 6.7   |                          |
| 99  | Q9HQ23 Q9HQ23   | 1 | 866.5225  | 24.8  | 286   | 294 | 5  | 26.1  | 19 | G | LPLLNGGAI            | A | 1.3   | 6.02  |                          |
| 99  | Q9HQ23 Q9HQ23   | 1 | 1222.7074 | 22.2  | 104   | 115 | 7  | 20.4  | 20 | V | NLAWWGPALALV         | G | 1.6   | 6.02  |                          |
| 100 | Q9HSA0 Q9HSA0   | 1 | 1260.6251 | -2.2  | 39    | 50  | 3  | 52.5  | 30 | A | FEHGLPSGPHLA         | D | -0.2  | 6.02  |                          |

| hit | accession     | z | mass      | ppm   | start | end | mc | score | id | - | sequence               | + | gravy | pl    | modification  |
|-----|---------------|---|-----------|-------|-------|-----|----|-------|----|---|------------------------|---|-------|-------|---------------|
| 103 | Q9HN43 CAPPA  | 1 | 930.4771  | -1.8  | 326   | 334 | 5  | 31.5  | 30 | L | AVIDRTADA              | Y | 0.2   | 3.88  |               |
| 103 | Q9HN43 CAPPA  | 1 | 1267.6561 | 11.5  | 308   | 319 | 3  | 45.9  | 27 | L | RDADLGAPFFPI           | D | -0.2  | 3.88  |               |
| 105 | Q9HHI3 Q9HHI3 | 1 | 1145.5088 | -12.1 | 69    | 79  | 4  | 32.6  | 25 | V | SLPDSVETDPS            | I | -0.8  | 2.88  |               |
| 110 | Q9HQE2 Q9HQE2 | 1 | 1498.8104 | -11.5 | 114   | 127 | 8  | 36.3  | 28 | L | DRLRDAGLDVAVVT         | N | 0.2   | 4.18  |               |
| 116 | O54610 O54610 | 1 | 745.4222  | 1.7   | 427   | 433 | 5  | 26.3  | 26 | T | EATLTLV                | G | 1.2   | 3.3   |               |
| 118 | Q9HMU9 Q9HMU9 | 1 | 1069.4393 | -3.3  | 37    | 45  | 3  | 35.1  | 22 | A | GYGYFFDTT              | T | -0.3  | 3.1   |               |
| 118 | Q9HMU9 Q9HMU9 | 1 | 1269.6254 | -3.9  | 257   | 265 | 1  | 37.7  | 28 | G | YWRFNTRDL              | - | -1.4  | 9.84  |               |
| 119 | Q9HPT9 Q9HPT9 | 1 | 2263.0128 | 2.7   | 61    | 82  | 8  | 56.9  | 25 | A | ALDLPGHGDSDDIETDPGPETL | D | -0.8  | 3.22  |               |
| 123 | Q9HPG5 TRPE1  | 1 | 940.4866  | 8.2   | 11    | 20  | 5  | 27.3  | 26 | T | ALADDGPAIV             | R | 0.9   | 2.92  |               |
| 126 | Q9HS00 Q9HS00 | 1 | 799.4804  | 13.9  | 492   | 500 | 8  | 32.1  | 27 | T | AAVVAATVV              | R | 2.6   | 6.02  |               |
| 126 | Q9HS00 Q9HS00 | 1 | 1449.8919 | -24.6 | 192   | 205 | 9  | 25.0  | 21 | S | NVLTQLKPVLGVI          | G | 1.0   | 10.1  |               |
| 127 | Q9HRU7 Q9HRU7 | 1 | 2158.1827 | -1.2  | 186   | 204 | 9  | 25.4  | 22 | T | VWLGyLDVIRPVFDALSPV    | L | 1.0   | 3.88  |               |
| 128 | Q9HN22 Q9HN22 | 1 | 1719.8104 | 2.4   | 149   | 165 | 9  | 48.7  | 28 | A | AAFLADIDHSAYGTPA       | Q | 0.3   | 3.88  |               |
| 132 | Q9HN79 Q9HN79 | 1 | 1037.6485 | -14.6 | 51    | 61  | 8  | 21.6  | 21 | A | VSAVGLVAPLI            | G | 2.3   | 6.02  |               |
| 140 | Q9HMV1 Q9HMV1 | 1 | 763.3752  | -13.6 | 48    | 54  | 3  | 28.2  | 28 | A | TFLEPGT                | T | 0.0   | 3.3   |               |
| 142 | Q9HPM1 Q9HPM1 | 1 | 1026.5458 | 18.7  | 164   | 174 | 7  | 30.5  | 27 | I | ADGTRPAVAVA            | T | 0.4   | 6.78  |               |
| 145 | Q9HMB7 Q9HMB7 | 1 | 1423.662  | 3.4   | 123   | 134 | 2  | 74.1  | 28 | A | REEDDFSIFAPV           | L | -0.4  | 3.58  |               |
| 150 | Q9HPY6 Q9HPY6 | 1 | 731.4694  | -20.0 | 390   | 395 | 3  | 34.3  | 22 | A | FARLLL                 | A | 1.9   | 11.04 |               |
| 151 | Q9HMY7 Q9HMY7 | 1 | 731.4582  | -6.0  | 104   | 110 | 5  | 24.0  | 22 | L | LAFVGI                 | V | 3.0   | 6.02  |               |
| 152 | Q9HRL4 Q9HRL4 | 1 | 1369.6514 | 2.0   | 83    | 93  | 3  | 56.1  | 28 | T | LYRNFDIDIVT            | N | -0.5  | 3.6   |               |
| 155 | Q9HQU8 Q9HQU8 | 1 | 2107.9698 | -0.5  | 13    | 30  | 4  | 41.1  | 26 | A | RLTDQDEFTPPESFVEQA     | N | -1.1  | 3.5   |               |
| 156 | Q9HSW2 Q9HSW2 | 1 | 713.4799  | 27.2  | 22    | 27  | 4  | 25.1  | 14 | S | IRSLLI                 | I | 1.9   | 11.04 |               |
| 158 | Q9HR62 Q9HR62 | 1 | 958.5964  | 20.2  | 21    | 29  | 6  | 14.1  | 14 | A | FRVGLAVVV              | L | 2.3   | 11.04 |               |
| 161 | Q9HMQ8 Q9HMQ8 | 1 | 731.4218  | 6.7   | 196   | 202 | 3  | 26.9  | 26 | A | IAAFLPT                | F | 1.8   | 6.02  |               |
| 162 | Q9HRA8 Q9HRA8 | 1 | 799.4803  | 8.0   | 319   | 326 | 5  | 31.5  | 28 | T | ALKAVGEI               | G | 1.0   | 6.94  |               |
| 164 | Q9HP98 Q9HP98 | 1 | 930.5022  | -21.7 | 23    | 32  | 8  | 40.6  | 30 | G | SVVLLSGEAG             | A | 1.2   | 3.3   |               |
| 165 | Q9HRJ0 Q9HRJ0 | 1 | 1122.5227 | -3.9  | 141   | 152 | 9  | 28.4  | 28 | A | MAAADTSVSALA           | L | 1.1   | 3.1   | Oxidation (M) |
| 175 | P25964 BACS1  | 1 | 1426.6187 | -1.9  | 219   | 231 | 1  | 29.5  | 25 | V | FMHSESPPAPEQA          | T | -0.9  | 4.24  |               |
| 177 | Q9HP66 Q9HP66 | 1 | 830.5266  | 9.9   | 117   | 124 | 6  | 25.1  | 19 | V | FLGLLAVV               | L | 3.0   | 6.02  |               |
| 182 | P33518 COX1   | 1 | 1447.6765 | 8.2   | 143   | 155 | 4  | 29.3  | 29 | I | DADDMAFPRINAI          | A | -0.1  | 3.6   |               |
| 183 | Q9HR22 Q9HR22 | 1 | 1658.8304 | 2.2   | 72    | 86  | 7  | 36.5  | 29 | V | YSELFGLAIGHPEQV        | L | 0.2   | 4.24  |               |
| 185 | Q9HN36 Q9HN36 | 1 | 731.4581  | -4.6  | 259   | 264 | 3  | 39.6  | 22 | T | FNLLLL                 | V | 2.4   | 6.02  |               |
| 186 | Q9HPK2 Y1595  | 1 | 974.5648  | 29.6  | 69    | 77  | 7  | 38.2  | 22 | G | STLLQLIS               | D | 1.0   | 6.02  |               |
| 188 | Q9HS30 Q9HS30 | 1 | 1222.7173 | -1.5  | 59    | 70  | 7  | 24.5  | 22 | A | LLADLPVEAGIL           | V | 1.5   | 3     |               |
| 189 | Q9HNY9 Q9HNY9 | 1 | 745.4446  | -18.0 | 121   | 127 | 4  | 27.1  | 25 | A | IAGTRKT                | T | -0.6  | 11.48 |               |
| 205 | Q9HN37 Q9HN37 | 1 | 1314.8275 | -13.2 | 539   | 550 | 8  | 25.2  | 17 | A | LVFQVKLSVVIA           | A | 2.1   | 10.1  |               |
| 221 | Q9HSQ7 Q9HSQ7 | 1 | 944.512   | -11.1 | 208   | 214 | 2  | 32.3  | 30 | A | LFTYRFV                | N | 1.0   | 9.84  |               |
| 234 | Q9HP76 Q9HP76 | 1 | 968.5807  | -8.2  | 119   | 126 | 3  | 25.9  | 24 | I | RWSIPIVV               | R | 1.2   | 11.04 |               |
| 236 | Q9HPQ6 Q9HPQ6 | 1 | 997.4393  | 14.3  | 25    | 32  | 3  | 26.5  | 26 | A | LVDWYTDS               | H | -0.3  | 2.92  |               |
| 239 | Q9HMQ2 JASSY  | 1 | 1365.6564 | -2.7  | 146   | 156 | 4  | 44.5  | 29 | L | GLTREWEIEYA            | A | -0.7  | 3.96  |               |

| hit | accession     | z | mass      | ppm   | start | end | mc | score | id | - | sequence         | + | gravy | pl    | modification             |
|-----|---------------|---|-----------|-------|-------|-----|----|-------|----|---|------------------|---|-------|-------|--------------------------|
| 248 | Q9HSJ4 Q9HSJ4 | 1 | 830.5266  | 9.9   | 21    | 28  | 6  | 25.1  | 19 | G | VFVILAVA         | A | 3.4   | 6.02  |                          |
| 258 | Q9HQE1 Q9HQE1 | 1 | 930.477   | -1.8  | 226   | 234 | 5  | 33.0  | 30 | T | ADLLSERGA        | N | -0.2  | 4.08  |                          |
| 260 | Q9HPQ1 Q9HPQ1 | 1 | 731.4582  | -4.6  | 376   | 382 | 5  | 29.2  | 22 | A | GLIGFLL          | F | 2.6   | 6.02  |                          |
| 266 | Q9HQU3 Q9HQU3 | 1 | 731.4582  | -6.0  | 143   | 149 | 5  | 36.3  | 22 | V | IIGLGFL          | A | 2.7   | 6.02  |                          |
| 270 | Q9HMC9 Q9HMC9 | 1 | 1137.6758 | 0.7   | 533   | 543 | 6  | 27.1  | 22 | S | NNASVLLIPV       | A | 1.6   | 6.02  |                          |
| 288 | Q9HST9 Q9HST9 | 1 | 896.395   | 15.6  | 7     | 14  | 2  | 30.7  | 26 | G | MTYADAPL         | R | 0.3   | 3.1   | Oxidation (M)            |
| 289 | O51975 O51975 | 1 | 713.4799  | 27.2  | 190   | 195 | 4  | 21.2  | 14 | L | RSLLI            | F | 1.9   | 11.04 |                          |
| 289 | O51975 O51975 | 1 | 1314.8169 | -5.2  | 184   | 194 | 6  | 21.6  | 17 | S | LCKTRLRSLLI      | I | 0.7   | 11.32 |                          |
| 294 | Q9HNI3 Q9HNI3 | 1 | 731.4582  | 0.1   | 114   | 120 | 5  | 30.6  | 22 | G | FGLAVIL          | A | 2.9   | 6.02  |                          |
| 299 | Q9HQ90 Q9HQ90 | 1 | 1066.5771 | 27.4  | 239   | 249 | 7  | 28.8  | 24 | A | QAALRAGADLV      | R | 0.6   | 6.78  | Gln->pyro-Glu (N-term Q) |
| 303 | Q9HQ63 DHSD   | 1 | 1038.5386 | -1.6  | 121   | 130 | 6  | 27.0  | 26 | A | SVPTFLTGF        | - | 1.1   | 6.02  |                          |
| 309 | Q9HMC7 THI4   | 1 | 1241.6252 | -8.2  | 83    | 94  | 5  | 28.4  | 28 | V | RSPAEAVLDDLG     | V | -0.2  | 3.7   |                          |
| 325 | Q9HQZ3 Q9HQZ3 | 1 | 930.477   | -22.9 | 36    | 44  | 5  | 30.2  | 30 | G | ERLAAVDSA        | G | 0.1   | 4.08  |                          |
| 343 | Q9HMB0 Q9HMB0 | 1 | 896.4127  | -0.6  | 10    | 17  | 3  | 35.0  | 26 | L | LYTPTDS          | D | -0.7  | 3.1   |                          |
| 345 | Q48325 TBPB   | 1 | 1409.7514 | 13.3  | 87    | 99  | 6  | 28.0  | 26 | I | RELGIDVTSNPPI    | E | -0.2  | 4.08  |                          |
| 348 | Q9HRW7 Q9HRW7 | 1 | 1618.7012 | 8.1   | 2     | 15  | 5  | 47.8  | 26 | M | SDALDAFDHDAWRT   | A | -0.9  | 3.86  |                          |
| 361 | Q9HSW6 CDC61  | 1 | 1098.6172 | -23.7 | 145   | 154 | 6  | 36.6  | 28 | I | LIVLDEVDI        | G | 1.6   | 2.88  |                          |
| 363 | Q9HMJ2 Q9HMJ2 | 1 | 876.4263  | 24.2  | 149   | 156 | 4  | 36.3  | 29 | A | EVSMADI          | D | 1.1   | 3     |                          |
| 371 | Q9HQH2 Q9HQH2 | 1 | 1441.6838 | -2.0  | 152   | 163 | 4  | 30.7  | 28 | V | NTRLQTFDGEYV     | M | -0.9  | 4.08  |                          |
| 392 | Q9HNB8 Q9HNB8 | 1 | 1293.6717 | -8.5  | 12    | 24  | 5  | 34.3  | 28 | A | SGHLAPLFDAAAPV   | R | 0.7   | 4.94  |                          |
| 395 | Q9HRR3 Q9HRR3 | 1 | 1093.4716 | 7.5   | 42    | 49  | 1  | 31.5  | 27 | L | TYEYFERS         | R | -1.6  | 4.26  |                          |
| 398 | Q9HRR2 Q9HRR2 | 1 | 1688.8661 | -1.7  | 42    | 54  | 5  | 47.2  | 28 | V | DYLELLETLYYRV    | N | 0.0   | 3.82  |                          |
| 408 | Q9HNJ2 Q9HNJ2 | 1 | 745.4222  | 0.3   | 116   | 122 | 5  | 31.9  | 27 | S | LVTETAL          | F | 1.2   | 3.3   |                          |
| 411 | Q9HM88 Q9HM88 | 1 | 1187.567  | -5.2  | 56    | 68  | 8  | 37.0  | 29 | A | SEIGTGAPSDALA    | A | 0.2   | 3     |                          |
| 433 | Q9HME2 Q9HME2 | 1 | 1988.0078 | 0.6   | 2     | 18  | 9  | 42.4  | 27 | M | VWIIDLVTMVEHFTTA | A | 0.9   | 4.06  |                          |
| 460 | Q9HMY1 Q9HMY1 | 1 | 955.5199  | 4.8   | 286   | 295 | 6  | 28.5  | 28 | A | NAAAQRVIGG       | T | 0.2   | 11.04 |                          |
| 488 | Q9HN08 Q9HN08 | 1 | 1727.8625 | 11.9  | 1     | 16  | 7  | 39.1  | 28 | - | MPTQDGERRDVIVGG  | G | -0.5  | 4.3   |                          |
| 493 | Q9HRH6 Q9HRH6 | 1 | 1480.731  | 2.6   | 143   | 156 | 9  | 38.8  | 28 | A | SYTGLRWLAGGAET   | - | -0.2  | 6.88  |                          |
| 495 | Q9HRR5 Q9HRR5 | 1 | 1313.5863 | 4.4   | 22    | 32  | 2  | 38.7  | 27 | I | MAGWYRTPEFG      | H | -0.6  | 6.88  |                          |
| 499 | Q9HS52 SYP    | 1 | 1698.861  | 27.7  | 449   | 465 | 9  | 29.3  | 27 | I | AAEIVMVLGEDSAARA | A | 0.6   | 3.82  |                          |
| 512 | Q9HRK3 Q9HRK3 | 1 | 731.4582  | -6.0  | 47    | 52  | 3  | 24.0  | 22 | I | IQFVLI           | G | 2.7   | 6.02  |                          |
| 520 | Q9HSE5 Q9HSE5 | 1 | 799.4804  | 20.8  | 81    | 89  | 8  | 27.2  | 27 | S | AAAAVTVV         | L | 2.6   | 6.02  |                          |
| 525 | Q9HQV6 Q9HQV6 | 1 | 731.4582  | -4.6  | 26    | 32  | 5  | 36.8  | 22 | V | LFGGLL           | I | 2.5   | 6.02  |                          |
| 537 | Q9HMK6 Q9HMK6 | 1 | 1727.9166 | -19.4 | 184   | 199 | 8  | 36.0  | 28 | T | EKDVSEARRDAVLAGI | T | -0.4  | 4.56  |                          |
| 545 | Q9HR54 Q9HR54 | 1 | 958.5964  | 20.2  | 335   | 343 | 6  | 24.0  | 14 | V | LFRAGGLL         | V | 1.6   | 11.04 |                          |
| 558 | Q9HQW3 Q9HQW3 | 1 | 986.6277  | -3.0  | 124   | 132 | 6  | 20.3  | 20 | L | LAFRIVIG         | C | 2.3   | 11.04 |                          |
| 587 | Q9HPI6 Q9HPI6 | 1 | 882.5175  | 26.2  | 15    | 24  | 7  | 33.2  | 25 | T | LPAAIGGITA       | Y | 1.5   | 6.02  |                          |
| 632 | Q9HRR7 Q9HRR7 | 1 | 1289.6364 | -27.7 | 41    | 55  | 8  | 32.6  | 28 | A | ADAGGPHLAPGVSA   | A | 0.3   | 4.94  |                          |
| 633 | Q9HQB1 Q9HQB1 | 1 | 958.6328  | -17.7 | 70    | 77  | 4  | 19.6  | 14 | V | KAVFRLI          | E | 1.6   | 11.48 |                          |
| 651 | Q9HRR6 Q9HRR6 | 1 | 1286.6295 | -1.0  | 95    | 104 | 1  | 30.2  | 29 | A | DFFEFEARKV       | E | -0.5  | 4.44  |                          |

| hit  | accession     | z | mass      | ppm   | start | end | mc | score | id | - | sequence        | + | gravy | pl    | modification |
|------|---------------|---|-----------|-------|-------|-----|----|-------|----|---|-----------------|---|-------|-------|--------------|
| 668  | Q9HN96 Q9HN96 | 1 | 1005.5495 | -16.0 | 41    | 50  | 6  | 29.3  | 28 | G | LLKSGLFGDG      | D | 0.5   | 6.76  |              |
| 689  | Q9HRP9 Q9HRP9 | 1 | 1255.6633 | -1.4  | 86    | 98  | 7  | 28.4  | 28 | V | GPDAVTGAVRRAS   | E | -0.2  | 10.88 |              |
| 721  | Q9HRE8 RTCA   | 1 | 1227.6711 | -16.9 | 95    | 107 | 9  | 29.2  | 29 | T | SVEVGTAGSIPLV   | F | 1.1   | 3.3   |              |
| 737  | Q9HRP5 Q9HRP5 | 1 | 745.4222  | 0.3   | 84    | 90  | 5  | 28.3  | 27 | V | TIETAVL         | Y | 1.3   | 3.3   |              |
| 743  | Q9HPV1 Q9HPV1 | 1 | 958.5964  | 20.2  | 33    | 41  | 6  | 14.3  | 14 | A | IAAFGLVRI       | S | 2.1   | 11.04 |              |
| 755  | Q9HS03 Q9HS03 | 1 | 1409.7337 | 26.0  | 60    | 73  | 8  | 26.1  | 26 | G | MPAEVVS AVKATHA | V | 0.6   | 7.82  |              |
| 981  | Q9HHQ7 Q9HHQ7 | 1 | 731.4581  | -6.0  | 125   | 130 | 3  | 24.0  | 22 | I | LLNFIL          | H | 2.5   | 6.02  |              |
| 1081 | Q9HNX9 Q9HNX9 | 1 | 713.48    | 27.2  | 126   | 131 | 4  | 15.6  | 14 | G | VTRILL          | G | 1.9   | 11.04 |              |
| 1082 | Q9HRF3 Q9HRF3 | 1 | 713.4799  | 27.2  | 85    | 90  | 4  | 15.6  | 14 | T | RLSLLL          | D | 1.7   | 11.04 |              |

END OF LIST V

| hit                                                                                     | accession   | z | mass      | ppm   | start | end | mc | score | id | - | sequence     | + | gravy | pl    | modification             |
|-----------------------------------------------------------------------------------------|-------------|---|-----------|-------|-------|-----|----|-------|----|---|--------------|---|-------|-------|--------------------------|
| <b>VI. Purple membrane; elastase digest; nLC-MALDI MS/MS; AVLIST search specificity</b> |             |   |           |       |       |     |    |       |    |   |              |   |       |       |                          |
| 1                                                                                       | P02945 BACR | 1 | 731.4582  | -4.6  | 231   | 237 | 3  | 57.7  | 21 | V | GFGLILL      | R | 2.6   | 6.02  |                          |
| 1                                                                                       | P02945 BACR | 1 | 734.4401  | -13.3 | 219   | 224 | 3  | 25.4  | 18 | T | LLFMVL       | D | 3.4   | 6.02  |                          |
| 1                                                                                       | P02945 BACR | 1 | 756.3919  | -5.4  | 19    | 24  | 0  | 27.5  | 25 | T | GRPEWI       | W | -1.1  | 6.98  |                          |
| 1                                                                                       | P02945 BACR | 1 | 762.4024  | 19.3  | 240   | 246 | 2  | 50.5  | 26 | S | RAIFGEA      | E | 0.4   | 6.98  |                          |
| 1                                                                                       | P02945 BACR | 1 | 799.4916  | 6.8   | 187   | 193 | 4  | 38.5  | 25 | V | LRNVTVV      | L | 1.1   | 11.04 |                          |
| 1                                                                                       | P02945 BACR | 1 | 817.4011  | -8.0  | 165   | 171 | 2  | 33.5  | 29 | V | LFFGFTS      | K | 1.5   | 6.02  |                          |
| 1                                                                                       | P02945 BACR | 1 | 828.3918  | 23.3  | 92    | 97  | 1  | 30.7  | 26 | I | YWARYA       | D | -0.7  | 9.58  |                          |
| 1                                                                                       | P02945 BACR | 1 | 834.4276  | -5.5  | 194   | 200 | 3  | 30.7  | 26 | V | LWSAYPV      | V | 0.7   | 5.92  |                          |
| 1                                                                                       | P02945 BACR | 1 | 835.4514  | -12.2 | 220   | 226 | 3  | 28.5  | 26 | L | LFMVLDV      | S | 2.5   | 3.1   |                          |
| 1                                                                                       | P02945 BACR | 1 | 857.4395  | -4.1  | 18    | 24  | 1  | 32.2  | 28 | I | TGRPEWI      | W | -1.0  | 6.98  |                          |
| 1                                                                                       | P02945 BACR | 1 | 869.4391  | -6.7  | 69    | 75  | 3  | 26.9  | 25 | T | MYLSMLL      | G | 1.9   | 5.92  |                          |
| 1                                                                                       | P02945 BACR | 1 | 887.4786  | -25.8 | 124   | 132 | 4  | 60.2  | 29 | A | LVGADGIMI    | G | 1.8   | 3.1   |                          |
| 1                                                                                       | P02945 BACR | 1 | 917.4276  | 0.1   | 174   | 181 | 2  | 37.9  | 27 | A | ESMRPEVA     | S | -0.8  | 4.26  |                          |
| 1                                                                                       | P02945 BACR | 1 | 930.4811  | -6.2  | 201   | 209 | 4  | 68.7  | 29 | V | VWLGSEGA     | G | 0.9   | 3.3   |                          |
| 1                                                                                       | P02945 BACR | 1 | 958.6215  | -6.1  | 229   | 237 | 4  | 44.1  | 14 | A | KVGFGLILL    | R | 2.0   | 10.1  |                          |
| 1                                                                                       | P02945 BACR | 1 | 967.5954  | -5.5  | 103   | 111 | 5  | 64.7  | 22 | T | TPLLLLDLA    | L | 1.7   | 3.1   |                          |
| 1                                                                                       | P02945 BACR | 1 | 974.5913  | -6.1  | 231   | 239 | 4  | 63.7  | 22 | V | GFGILLRS     | R | 1.4   | 11.04 |                          |
| 1                                                                                       | P02945 BACR | 1 | 991.5015  | -7.5  | 98    | 105 | 2  | 29.0  | 28 | A | DWLFTTPL     | L | 0.4   | 3.1   |                          |
| 1                                                                                       | P02945 BACR | 1 | 1005.5356 | -1.8  | 238   | 246 | 3  | 37.5  | 27 | L | RSRAIFGEA    | E | -0.3  | 10.88 |                          |
| 1                                                                                       | P02945 BACR | 1 | 1016.5331 | 20.5  | 165   | 173 | 3  | 27.3  | 27 | V | LFFGFTSKA    | E | 0.9   | 10.1  |                          |
| 1                                                                                       | P02945 BACR | 1 | 1032.44   | -18.0 | 243   | 252 | 1  | 80.2  | 21 | I | FGAEAEPEPS   | A | -0.9  | 3.02  |                          |
| 1                                                                                       | P02945 BACR | 1 | 1043.5499 | -2.0  | 112   | 121 | 5  | 72.5  | 29 | A | LLVDADQGTI   | L | 0.7   | 2.92  |                          |
| 1                                                                                       | P02945 BACR | 1 | 1055.5552 | -11.0 | 19    | 26  | 1  | 38.6  | 26 | T | GRPEWIWL     | A | -0.4  | 6.98  |                          |
| 1                                                                                       | P02945 BACR | 1 | 1062.6186 | -2.5  | 182   | 190 | 4  | 56.9  | 22 | A | STFKVLRNV    | T | 0.2   | 11.48 |                          |
| 1                                                                                       | P02945 BACR | 1 | 1070.5185 | 24.5  | 95    | 102 | 2  | 61.3  | 27 | A | RYADWLFT     | T | -0.3  | 6.7   |                          |
| 1                                                                                       | P02945 BACR | 1 | 1081.5556 | 1.9   | 16    | 24  | 2  | 61.4  | 26 | A | QITGRPEWI    | W | -0.7  | 6.98  | Gln->pyro-Glu (N-term Q) |
| 1                                                                                       | P02945 BACR | 1 | 1098.5822 | 2.5   | 16    | 24  | 2  | 50.6  | 27 | A | QITGRPEWI    | W | -0.7  | 6.98  |                          |
| 1                                                                                       | P02945 BACR | 1 | 1116.6907 | 4.9   | 227   | 237 | 6  | 53.5  | 17 | V | SAKVGFGILL   | R | 1.7   | 10.1  |                          |
| 1                                                                                       | P02945 BACR | 1 | 1126.5923 | 16.7  | 19    | 27  | 2  | 51.6  | 26 | T | GRPEWIWLA    | L | -0.2  | 6.98  |                          |
| 1                                                                                       | P02945 BACR | 1 | 1145.524  | -25.4 | 242   | 252 | 2  | 79.0  | 23 | A | IFGEAEPEPS   | A | -0.4  | 3.02  |                          |
| 1                                                                                       | P02945 BACR | 1 | 1156.6029 | 6.2   | 18    | 26  | 2  | 56.0  | 28 | I | TGRPEWIWL    | A | -0.5  | 6.98  |                          |
| 1                                                                                       | P02945 BACR | 1 | 1156.634  | 0.3   | 112   | 122 | 6  | 106.5 | 27 | A | LLVDADQGTIL  | A | 0.9   | 2.92  |                          |
| 1                                                                                       | P02945 BACR | 1 | 1173.7234 | 2.8   | 184   | 193 | 5  | 18.7  | 17 | T | FKVLRNVTVV   | L | 1.1   | 11.48 |                          |
| 1                                                                                       | P02945 BACR | 1 | 1187.5645 | -21.1 | 81    | 91  | 0  | 93.9  | 26 | T | MVPFGGEQNPI  | Y | -0.1  | 3.3   |                          |
| 1                                                                                       | P02945 BACR | 1 | 1203.5594 | -19.2 | 81    | 91  | 0  | 81.4  | 26 | T | MVPFGGEQNPI  | Y | -0.1  | 3.3   | Oxidation (M)            |
| 1                                                                                       | P02945 BACR | 1 | 1215.7115 | -8.0  | 101   | 111 | 6  | 62.7  | 25 | L | FTTPLLLLLDLA | L | 1.6   | 3.1   |                          |
| 1                                                                                       | P02945 BACR | 1 | 1227.64   | 22.3  | 18    | 27  | 3  | 56.7  | 28 | I | TGRPEWIWLA   | L | -0.2  | 6.98  |                          |

| hit | accession   | z | mass      | ppm   | start | end | mc | score | id | - | sequence           | + | gravy | pl    | modification             |
|-----|-------------|---|-----------|-------|-------|-----|----|-------|----|---|--------------------|---|-------|-------|--------------------------|
| 1   | P02945 BACR | 1 | 1227.6711 | -24.1 | 112   | 123 | 7  | 113.1 | 27 | A | LLVDADQGTLA        | L | 1.0   | 2.92  |                          |
| 1   | P02945 BACR | 1 | 1239.6764 | -2.6  | 19    | 28  | 3  | 37.1  | 25 | T | GRPEWIWLAL         | G | 0.2   | 6.98  |                          |
| 1   | P02945 BACR | 1 | 1242.5822 | -3.0  | 92    | 100 | 2  | 36.3  | 26 | I | YWARYADWL          | F | -0.6  | 6.64  |                          |
| 1   | P02945 BACR | 1 | 1253.6292 | -0.8  | 48    | 58  | 3  | 66.4  | 27 | V | SDPDAKKFYAI        | T | -0.7  | 6.8   |                          |
| 1   | P02945 BACR | 1 | 1274.7711 | 3.0   | 183   | 193 | 6  | 61.6  | 19 | S | TFKVLNRNVTVV       | L | 0.9   | 11.48 |                          |
| 1   | P02945 BACR | 1 | 1280.6513 | 3.6   | 14    | 24  | 3  | 72.7  | 27 | S | QAQITGRPEWI        | W | -0.7  | 6.98  | Gln->pyro-Glu (N-term Q) |
| 1   | P02945 BACR | 1 | 1296.7152 | -14.7 | 31    | 42  | 6  | 35.0  | 26 | T | ALMGLGTLYFLV       | K | 1.9   | 5.92  |                          |
| 1   | P02945 BACR | 1 | 1314.8136 | -2.6  | 231   | 242 | 6  | 70.3  | 17 | V | GFGILLRSRAI        | F | 1.2   | 12.4  |                          |
| 1   | P02945 BACR | 1 | 1340.7241 | -0.5  | 18    | 28  | 4  | 28.5  | 26 | I | TGRPEWIWLAL        | G | 0.1   | 6.98  |                          |
| 1   | P02945 BACR | 1 | 1354.6769 | 5.9   | 48    | 59  | 4  | 75.7  | 27 | V | SDPDAKKFYAIT       | T | -0.7  | 6.8   |                          |
| 1   | P02945 BACR | 1 | 1361.8031 | 1.8   | 182   | 193 | 7  | 76.5  | 21 | A | STFKVLNRNVTVV      | L | 0.8   | 11.48 |                          |
| 1   | P02945 BACR | 1 | 1372.6623 | 5.1   | 240   | 252 | 3  | 109.7 | 28 | S | RAIFGEAEAPEPS      | A | -0.5  | 3.96  |                          |
| 1   | P02945 BACR | 1 | 1380.719  | -3.1  | 16    | 26  | 3  | 71.8  | 27 | A | QITGRPEWIWL        | A | -0.3  | 6.98  | Gln->pyro-Glu (N-term Q) |
| 1   | P02945 BACR | 1 | 1381.703  | 16.1  | 95    | 105 | 3  | 74.5  | 26 | A | RYADWLFTTPL        | L | -0.1  | 6.7   |                          |
| 1   | P02945 BACR | 1 | 1397.7456 | -0.4  | 19    | 30  | 4  | 49.0  | 27 | T | GRPEWIWLALGT       | A | 0.1   | 6.98  |                          |
| 1   | P02945 BACR | 1 | 1409.7919 | -15.3 | 201   | 214 | 6  | 111.2 | 25 | V | VWLGISEGAGIVPL     | N | 1.3   | 3.3   |                          |
| 1   | P02945 BACR | 1 | 1443.6994 | 0.1   | 240   | 253 | 4  | 83.6  | 28 | S | RAIFGEAEAPEPSA     | G | -0.4  | 3.96  |                          |
| 1   | P02945 BACR | 1 | 1451.7561 | 1.0   | 16    | 27  | 4  | 88.0  | 27 | A | QITGRPEWIWLA       | L | -0.1  | 6.98  | Gln->pyro-Glu (N-term Q) |
| 1   | P02945 BACR | 1 | 1468.7827 | 11.0  | 16    | 27  | 4  | 61.8  | 26 | A | QITGRPEWIWLA       | L | -0.1  | 6.98  |                          |
| 1   | P02945 BACR | 1 | 1490.6983 | 2.3   | 92    | 102 | 3  | 53.0  | 28 | I | YWARYADWLFT        | T | -0.3  | 6.64  |                          |
| 1   | P02945 BACR | 1 | 1498.7932 | 0.3   | 18    | 30  | 5  | 89.2  | 28 | I | TGRPEWIWLALGT      | A | 0.0   | 6.98  |                          |
| 1   | P02945 BACR | 1 | 1579.8147 | 0.2   | 14    | 26  | 4  | 81.9  | 27 | S | QAQITGRPEWIWL      | A | -0.4  | 6.98  | Gln->pyro-Glu (N-term Q) |
| 1   | P02945 BACR | 1 | 1607.7442 | 3.4   | 81    | 94  | 1  | 64.3  | 28 | T | MVPFGGEQNPYWA      | R | -0.1  | 3.3   |                          |
| 1   | P02945 BACR | 1 | 1607.8712 | 4.1   | 95    | 107 | 5  | 77.8  | 25 | A | RYADWLFTTPLL       | L | 0.5   | 6.7   |                          |
| 1   | P02945 BACR | 1 | 1615.7954 | 1.2   | 238   | 252 | 4  | 108.0 | 28 | L | RSRAIFGEAEAPEPS    | A | -0.8  | 4.56  |                          |
| 1   | P02945 BACR | 1 | 1629.9018 | 4.5   | 98    | 111 | 7  | 64.6  | 25 | A | DWLFTTPLLDDLA      | L | 1.2   | 2.92  |                          |
| 1   | P02945 BACR | 1 | 1650.8518 | 10.8  | 14    | 27  | 5  | 106.1 | 27 | S | QAQITGRPEWIWLA     | L | -0.2  | 6.98  | Gln->pyro-Glu (N-term Q) |
| 1   | P02945 BACR | 1 | 1671.923  | -12.1 | 126   | 143 | 9  | 91.6  | 26 | V | GADGIMIGTGLVGALTKV | Y | 1.1   | 6.76  |                          |
| 1   | P02945 BACR | 1 | 1678.8025 | -3.5  | 76    | 91  | 2  | 123.4 | 27 | L | GYGLTMVFPFGGEQNPI  | Y | 0.0   | 3.3   |                          |
| 1   | P02945 BACR | 1 | 1686.8325 | -4.8  | 238   | 253 | 5  | 82.3  | 28 | L | RSRAIFGEAEAPEPSA   | G | -0.6  | 4.56  |                          |
| 1   | P02945 BACR | 1 | 1694.7974 | -7.2  | 76    | 91  | 2  | 115.0 | 26 | L | GYGLTMVFPFGGEQNPI  | Y | 0.0   | 3.3   | Oxidation (M)            |
| 1   | P02945 BACR | 1 | 1718.9832 | 0.8   | 231   | 246 | 7  | 57.5  | 22 | V | GFGILLRSRAIFGEA    | E | 0.9   | 10.88 |                          |
| 1   | P02945 BACR | 1 | 1720.9552 | -1.7  | 95    | 108 | 6  | 101.0 | 24 | A | RYADWLFTTPLL       | D | 0.7   | 6.7   |                          |
| 1   | P02945 BACR | 1 | 1722.9093 | 8.1   | 16    | 30  | 6  | 98.0  | 26 | A | QITGRPEWIWLALGT    | A | 0.1   | 6.98  | Gln->pyro-Glu (N-term Q) |
| 1   | P02945 BACR | 1 | 1739.9359 | 3.7   | 16    | 30  | 6  | 70.5  | 26 | A | QITGRPEWIWLALGT    | A | 0.1   | 6.98  |                          |
| 1   | P02945 BACR | 1 | 1743.8064 | -2.3  | 240   | 257 | 5  | 54.0  | 27 | S | RAIFGEAEAPEPSAGDGA | A | -0.4  | 3.68  |                          |
| 1   | P02945 BACR | 1 | 1754.9104 | -2.2  | 13    | 27  | 6  | 33.0  | 27 | V | SQAQITGRPEWIWLA    | L | -0.3  | 6.98  |                          |
| 1   | P02945 BACR | 1 | 1801.8828 | 1.1   | 92    | 105 | 4  | 76.1  | 28 | I | YWARYADWLFTTPL     | L | -0.1  | 6.64  |                          |
| 1   | P02945 BACR | 1 | 1826.9237 | 12.0  | 43    | 59  | 5  | 39.8  | 27 | V | KGMGVSDPDAKKFYAIT  | T | -0.4  | 9.56  |                          |
| 1   | P02945 BACR | 1 | 1835.9669 | -4.5  | 48    | 64  | 7  | 95.0  | 27 | V | SDPDAKKFYAITTLVPA  | I | 0.0   | 6.8   |                          |

| hit | accession   | z | mass      | ppm   | start | end | mc | score | id | - | sequence               | + | gravy | pI    | modification             |
|-----|-------------|---|-----------|-------|-------|-----|----|-------|----|---|------------------------|---|-------|-------|--------------------------|
| 1   | P02945 BACR | 1 | 1841.9635 | -11.6 | 236   | 252 | 6  | 64.1  | 28 | I | LLRSRAIFGEAEAPEPS      | A | -0.3  | 4.56  |                          |
| 1   | P02945 BACR | 1 | 1885.8806 | -5.0  | 240   | 259 | 7  | 28.5  | 26 | S | RAIFGEAEPEPSAGDGAAA    | T | -0.2  | 3.68  |                          |
| 1   | P02945 BACR | 1 | 1922.005  | -2.2  | 14    | 30  | 7  | 101.8 | 26 | S | QAQITGRPEWIWLALGT      | A | 0.0   | 6.98  | Gln->pyro-Glu (N-term Q) |
| 1   | P02945 BACR | 1 | 1955.0476 | -3.5  | 235   | 252 | 7  | 58.1  | 26 | L | ILLRSRAIFGEAEAPEPS     | A | 0.0   | 4.56  |                          |
| 1   | P02945 BACR | 1 | 2020.1033 | -2.5  | 95    | 111 | 8  | 127.6 | 24 | A | RYADWLFTTPLLDDLA       | L | 0.7   | 3.88  |                          |
| 1   | P02945 BACR | 1 | 2073.9603 | -0.5  | 240   | 261 | 9  | 57.1  | 26 | S | RAIFGEAEPEPSAGDGAAATS  | D | -0.2  | 3.68  |                          |
| 1   | P02945 BACR | 1 | 2210.1484 | -3.7  | 8     | 27  | 9  | 44.2  | 26 | T | AVEGVSQAQITGRPEWIWLA   | L | 0.1   | 4.26  |                          |
| 1   | P02945 BACR | 1 | 2329.243  | -4.9  | 231   | 252 | 8  | 119.5 | 24 | V | GFGLILLRSRAIFGEAEAPEPS | A | 0.3   | 4.56  |                          |
| 1   | P02945 BACR | 1 | 2440.2831 | -0.2  | 92    | 111 | 9  | 75.3  | 23 | I | YWARYADWLFTTPLLDDLA    | L | 0.6   | 3.88  |                          |
| 2   | P00772 ELA1 | 1 | 800.3851  | 9.2   | 54    | 61  | 3  | 46.1  | 25 | A | HTCGGTLI               | R | 0.7   | 7.16  |                          |
| 2   | P00772 ELA1 | 1 | 873.4093  | 0.5   | 34    | 40  | 1  | 28.8  | 27 | A | QRNSWPS                | Q | -2.2  | 11.04 |                          |
| 2   | P00772 ELA1 | 1 | 882.5287  | 0.6   | 138   | 146 | 3  | 30.3  | 23 | L | GVLPRAGTI              | L | 0.7   | 11.04 |                          |
| 2   | P00772 ELA1 | 1 | 890.461   | 15.9  | 156   | 163 | 3  | 49.8  | 27 | I | TGWGLTRT               | N | -0.6  | 11.04 |                          |
| 2   | P00772 ELA1 | 1 | 915.4239  | -1.4  | 105   | 111 | 1  | 29.8  | 25 | V | VHPYWNT                | D | -1.0  | 7.76  |                          |
| 2   | P00772 ELA1 | 1 | 933.4491  | 0.3   | 62    | 68  | 1  | 40.3  | 28 | I | RQNWVMT                | A | -1.0  | 11.04 |                          |
| 2   | P00772 ELA1 | 1 | 943.4512  | -7.2  | 223   | 231 | 2  | 49.9  | 26 | V | NGQYAVHGV              | T | -0.2  | 7.76  |                          |
| 2   | P00772 ELA1 | 1 | 1004.4862 | -2.5  | 62    | 69  | 2  | 45.1  | 28 | I | RQNWVMTA               | A | -0.7  | 11.04 |                          |
| 2   | P00772 ELA1 | 1 | 1014.4923 | 7.2   | 104   | 111 | 2  | 55.5  | 27 | I | VVHPYWNT               | D | -0.4  | 7.76  |                          |
| 2   | P00772 ELA1 | 1 | 1040.4675 | 2.4   | 45    | 53  | 3  | 25.3  | 25 | L | QYRSGSSWA              | H | -1.2  | 9.84  |                          |
| 2   | P00772 ELA1 | 1 | 1066.6499 | 0.0   | 138   | 148 | 5  | 54.4  | 20 | L | GVLPRAGTILA            | N | 1.1   | 11.04 |                          |
| 2   | P00772 ELA1 | 1 | 1097.5254 | 3.6   | 34    | 42  | 2  | 71.2  | 26 | A | QRNSWPSQI              | S | -1.6  | 11.04 | Gln->pyro-Glu (N-term Q) |
| 2   | P00772 ELA1 | 1 | 1114.5519 | 10.2  | 34    | 42  | 2  | 55.5  | 28 | A | QRNSWPSQI              | S | -1.6  | 11.04 |                          |
| 2   | P00772 ELA1 | 1 | 1123.6713 | -5.1  | 136   | 146 | 4  | 39.4  | 22 | V | QLGVLPRAGTI            | L | 0.6   | 11.04 |                          |
| 2   | P00772 ELA1 | 1 | 1214.5568 | -8.9  | 187   | 197 | 5  | 66.1  | 25 | S | SSYWGSTVKNS            | M | -0.9  | 9.72  |                          |
| 2   | P00772 ELA1 | 1 | 1240.5836 | -0.2  | 43    | 53  | 5  | 63.8  | 26 | I | SLQYRSGSSWA            | H | -0.7  | 9.84  |                          |
| 2   | P00772 ELA1 | 1 | 1244.5462 | 6.2   | 105   | 114 | 2  | 72.6  | 25 | V | VHPYWNTDDV             | A | -1.0  | 3.88  |                          |
| 2   | P00772 ELA1 | 1 | 1262.6659 | -15.8 | 254   | 264 | 6  | 41.0  | 28 | S | AYISWINNVIA            | S | 1.0   | 5.92  |                          |
| 2   | P00772 ELA1 | 1 | 1307.7925 | -5.4  | 136   | 148 | 6  | 22.4  | 20 | V | QLGVLPRAGTILA          | N | 1.0   | 11.04 |                          |
| 2   | P00772 ELA1 | 1 | 1315.5833 | 10.9  | 105   | 115 | 3  | 62.6  | 26 | V | VHPYWNTDDVA            | A | -0.7  | 3.88  |                          |
| 2   | P00772 ELA1 | 1 | 1321.6813 | -8.2  | 239   | 250 | 4  | 42.9  | 27 | L | GCVNTRKPTVFT           | R | -0.2  | 10.1  |                          |
| 2   | P00772 ELA1 | 1 | 1343.6146 | -2.2  | 104   | 114 | 3  | 75.6  | 26 | I | VVHPYWNTDDV            | A | -0.5  | 3.88  |                          |
| 2   | P00772 ELA1 | 1 | 1385.8031 | -2.6  | 134   | 146 | 5  | 51.3  | 24 | S | YVQLGVLPRAGTI          | L | 0.8   | 9.84  |                          |
| 2   | P00772 ELA1 | 1 | 1386.6204 | 4.4   | 105   | 116 | 4  | 96.9  | 26 | V | VHPYWNTDDVAA           | G | -0.5  | 3.88  |                          |
| 2   | P00772 ELA1 | 1 | 1414.6517 | 1.6   | 104   | 115 | 4  | 81.2  | 27 | I | VVHPYWNTDDVA           | A | -0.3  | 3.88  |                          |
| 2   | P00772 ELA1 | 1 | 1427.7481 | -3.9  | 162   | 174 | 5  | 56.8  | 28 | T | RTNGQLAQLQQA           | Y | -1.0  | 11.04 |                          |
| 2   | P00772 ELA1 | 1 | 1485.6889 | -1.8  | 104   | 116 | 5  | 89.6  | 26 | I | VVHPYWNTDDVAA          | G | -0.2  | 3.88  |                          |
| 2   | P00772 ELA1 | 1 | 1529.7223 | -0.3  | 29    | 42  | 4  | 71.0  | 27 | V | GGTEAQRNSWPSQI         | S | -1.3  | 6.98  |                          |
| 2   | P00772 ELA1 | 1 | 1590.8729 | -1.2  | 124   | 137 | 8  | 31.5  | 25 | L | RLAQSVTLNSYVQL         | G | 0.2   | 9.84  |                          |
| 2   | P00772 ELA1 | 1 | 1712.8522 | -17.2 | 101   | 114 | 4  | 92.1  | 27 | V | QKIVVHPYWNTDDV         | A | -0.6  | 5.1   |                          |
| 2   | P00772 ELA1 | 1 | 1715.8955 | 0.2   | 156   | 171 | 7  | 67.9  | 27 | I | TGWGLTRTNGQLAQL        | Q | -0.4  | 11.04 |                          |

| hit | accession       | z | mass      | ppm   | start | end | mc | score | id | - | sequence               | + | gravy | pl    | modification |
|-----|-----------------|---|-----------|-------|-------|-----|----|-------|----|---|------------------------|---|-------|-------|--------------|
| 2   | P00772 ELA1     | 1 | 1770.9992 | 0.3   | 132   | 148 | 8  | 37.3  | 23 | L | NSYVQLGVLPRAGTILA      | N | 0.7   | 9.84  |              |
| 2   | P00772 ELA1     | 1 | 1801.0098 | -0.6  | 130   | 146 | 8  | 127.3 | 23 | V | TLNSYVQLGVLPRAGTI      | L | 0.5   | 9.84  |              |
| 2   | P00772 ELA1     | 1 | 1815.8024 | -2.5  | 83    | 98  | 3  | 130.9 | 24 | V | VGEHNLNQNDGTEQYV       | G | -1.4  | 3.82  |              |
| 2   | P00772 ELA1     | 1 | 1905.8533 | -0.6  | 105   | 121 | 6  | 119.4 | 26 | V | VHPYWNTDDVAAGYDIA      | L | -0.3  | 3.6   |              |
| 2   | P00772 ELA1     | 1 | 1914.8708 | 1.0   | 82    | 98  | 4  | 132.9 | 26 | V | VVGEHNLNQNDGTEQYV      | G | -1.0  | 3.82  |              |
| 2   | P00772 ELA1     | 1 | 1933.8847 | 9.8   | 104   | 120 | 6  | 65.5  | 27 | I | VVHPYWNTDDVAAGYDI      | A | -0.2  | 3.6   |              |
| 2   | P00772 ELA1     | 1 | 1971.8923 | 2.7   | 83    | 100 | 4  | 147.5 | 26 | V | VGEHNLNQNDGTEQYVGV     | Q | -1.0  | 3.82  |              |
| 2   | P00772 ELA1     | 1 | 2004.9218 | -0.4  | 104   | 121 | 7  | 144.5 | 26 | I | VVHPYWNTDDVAAGYDIA     | L | -0.1  | 3.6   |              |
| 2   | P00772 ELA1     | 1 | 2043.0498 | 3.2   | 156   | 174 | 8  | 103.5 | 27 | I | TGWGLTRTNGQLAQLTQQA    | Y | -0.6  | 11.04 |              |
| 2   | P00772 ELA1     | 1 | 2070.9607 | -2.5  | 82    | 100 | 5  | 154.5 | 26 | V | VVGEHNLNQNDGTEQYVGV    | Q | -0.7  | 3.82  |              |
| 2   | P00772 ELA1     | 1 | 2118.0058 | 2.6   | 104   | 122 | 8  | 34.4  | 27 | I | VVHPYWNTDDVAAGYDIAL    | L | 0.2   | 3.6   |              |
| 2   | P00772 ELA1     | 1 | 2231.0899 | -4.3  | 104   | 123 | 9  | 137.8 | 26 | I | VVHPYWNTDDVAAGYDIALL   | R | 0.3   | 3.6   |              |
| 2   | P00772 ELA1     | 1 | 2317.1087 | 3.5   | 79    | 98  | 5  | 35.5  | 27 | T | FRVVVGEHNLNQNDGTEQYV   | G | -0.8  | 4.42  |              |
| 2   | P00772 ELA1     | 1 | 2341.1299 | -5.7  | 83    | 103 | 5  | 96.7  | 26 | V | VGEHNLNQNDGTEQYVGVQKI  | V | -1.0  | 4.42  |              |
| 2   | P00772 ELA1     | 1 | 2374.1594 | -0.3  | 101   | 121 | 8  | 130.5 | 27 | V | QKIVVHPYWNTDDVAAGYDIA  | L | -0.2  | 4.16  |              |
| 2   | P00772 ELA1     | 1 | 2440.1983 | 4.2   | 82    | 103 | 6  | 110.4 | 26 | V | VVGEHNLNQNDGTEQYVGVQKI | V | -0.8  | 4.42  |              |
| 2   | P00772 ELA1     | 1 | 2473.1986 | -6.8  | 79    | 100 | 6  | 27.3  | 26 | T | FRVVVGEHNLNQNDGTEQYVGV | Q | -0.5  | 4.42  |              |
| 3   | Q9HMMW9 Q9HMMW9 | 1 | 978.5287  | 8.2   | 636   | 643 | 1  | 55.1  | 25 | A | FHLQPPQL               | F | -0.4  | 7.84  |              |
| 3   | Q9HMMW9 Q9HMMW9 | 1 | 1166.6084 | -23.3 | 616   | 624 | 2  | 48.3  | 27 | A | YVINREQFV              | S | -0.1  | 6.88  |              |
| 3   | Q9HMMW9 Q9HMMW9 | 1 | 1212.6292 | 3.9   | 636   | 645 | 2  | 70.1  | 27 | A | FHLQPPQLFS             | D | -0.1  | 7.84  |              |
| 3   | Q9HMMW9 Q9HMMW9 | 1 | 1253.6404 | -2.8  | 616   | 625 | 3  | 49.8  | 27 | A | YVINREQFVS             | D | -0.1  | 6.88  |              |
| 3   | Q9HMMW9 Q9HMMW9 | 1 | 1367.618  | -8.8  | 133   | 143 | 1  | 37.8  | 25 | L | QYQSPTWKEMA            | N | -1.5  | 6.86  |              |
| 3   | Q9HMMW9 Q9HMMW9 | 1 | 1368.686  | -1.2  | 614   | 624 | 3  | 41.0  | 27 | A | MAYVINREQFV            | S | 0.3   | 6.88  |              |
| 3   | Q9HMMW9 Q9HMMW9 | 1 | 1441.7049 | -3.6  | 166   | 178 | 5  | 93.1  | 27 | S | SLLETTKQGEHEA          | F | -1.1  | 4.54  |              |
| 3   | Q9HMMW9 Q9HMMW9 | 1 | 1455.718  | -2.1  | 614   | 625 | 4  | 39.1  | 27 | A | MAYVINREQFVS           | D | 0.2   | 6.88  |              |
| 3   | Q9HMMW9 Q9HMMW9 | 1 | 1467.7358 | -1.0  | 616   | 627 | 4  | 38.3  | 27 | A | YVINREQFVSDV           | F | -0.1  | 4.08  |              |
| 3   | Q9HMMW9 Q9HMMW9 | 1 | 1567.7307 | -7.4  | 120   | 132 | 1  | 33.7  | 26 | A | GYGPDNKYELNWL          | Q | -1.2  | 4.08  |              |
| 3   | Q9HMMW9 Q9HMMW9 | 1 | 1619.7144 | -5.0  | 92    | 104 | 0  | 85.3  | 25 | T | DYQPDFDKYPYGI          | D | -1.4  | 3.6   |              |
| 3   | Q9HMMW9 Q9HMMW9 | 1 | 1695.7926 | -3.9  | 133   | 146 | 3  | 89.6  | 26 | L | QYQSPTWKEMANTI         | R | -1.1  | 6.86  |              |
| 3   | Q9HMMW9 Q9HMMW9 | 1 | 1736.8958 | 0.9   | 619   | 633 | 3  | 89.0  | 27 | I | NREQFVSDVFKGRGV        | G | -0.7  | 10.08 |              |
| 3   | Q9HMMW9 Q9HMMW9 | 1 | 1802.905  | -1.4  | 166   | 181 | 7  | 124.4 | 28 | S | SLLETTKQGEHEAFTL       | G | -0.5  | 4.54  |              |
| 3   | Q9HMMW9 Q9HMMW9 | 1 | 1857.9335 | -0.5  | 595   | 610 | 3  | 105.2 | 28 | I | DTYYVGFNMTKVPKPV       | R | -0.3  | 9.46  |              |
| 3   | Q9HMMW9 Q9HMMW9 | 1 | 1864.9544 | 0.1   | 619   | 635 | 4  | 92.1  | 27 | I | NREQFVSDVFKGRGVGA      | F | -0.5  | 10.08 |              |
| 3   | Q9HMMW9 Q9HMMW9 | 1 | 1964.8316 | -1.5  | 92    | 107 | 1  | 120.4 | 22 | T | DYQPDFDKYPYGIDET       | K | -1.6  | 3.36  |              |
| 3   | Q9HMMW9 Q9HMMW9 | 1 | 1971.0176 | -5.5  | 594   | 610 | 4  | 53.8  | 27 | T | IDTYYVGFNMTKVPKPV      | R | 0.0   | 9.46  |              |
| 3   | Q9HMMW9 Q9HMMW9 | 1 | 1987.9421 | -0.4  | 149   | 165 | 6  | 40.2  | 27 | A | RLEQAHIEMTINDANFS      | S | -0.5  | 4.42  |              |
| 3   | Q9HMMW9 Q9HMMW9 | 1 | 1993.8582 | 1.5   | 88    | 104 | 2  | 90.4  | 23 | T | GESTDYQPDFDKYPYGI      | D | -1.4  | 3.5   |              |
| 3   | Q9HMMW9 Q9HMMW9 | 1 | 2072.0653 | -8.3  | 593   | 610 | 5  | 36.7  | 27 | S | TIDTYYVGFNMTKVPKPV     | R | -0.1  | 9.46  |              |
| 3   | Q9HMMW9 Q9HMMW9 | 1 | 2112.1116 | 2.3   | 616   | 633 | 5  | 95.5  | 25 | A | YVINREQFVSDVFKGRGV     | G | -0.2  | 9.72  |              |
| 3   | Q9HMMW9 Q9HMMW9 | 1 | 2159.0973 | 0.5   | 592   | 610 | 6  | 39.7  | 27 | V | STIDTYYVGFNMTKVPKPV    | R | -0.1  | 9.46  |              |



| hit | accession       | z | mass      | ppm  | start | end | mc | score | id | - | sequence                   | + | gravy | pl   | modification  |
|-----|-----------------|---|-----------|------|-------|-----|----|-------|----|---|----------------------------|---|-------|------|---------------|
| 3   | Q9HMMW9 Q9HMMW9 | 1 | 2240.1702 | -3.3 | 616   | 635 | 6  | 56.5  | 26 | A | YVINREQFVSDVFKGRGVGA       | F | -0.1  | 9.72 |               |
| 3   | Q9HMMW9 Q9HMMW9 | 1 | 2263.0321 | 3.4  | 92    | 110 | 3  | 35.0  | 26 | T | DYQPDFDKYPYGIDETKVA        | E | -1.2  | 3.76 |               |
| 3   | Q9HMMW9 Q9HMMW9 | 1 | 2314.1892 | -0.5 | 614   | 633 | 6  | 97.4  | 25 | A | MAYVINREQFVSDVFKGRGV       | G | 0.0   | 9.72 |               |
| 3   | Q9HMMW9 Q9HMMW9 | 1 | 2338.9754 | 7.7  | 88    | 107 | 3  | 98.9  | 21 | T | GESTDYQPDFDKYPYGIDET       | K | -1.6  | 3.32 |               |
| 3   | Q9HMMW9 Q9HMMW9 | 1 | 2442.2478 | 1.7  | 614   | 635 | 7  | 52.0  | 25 | A | MAYVINREQFVSDVFKGRGVGA     | F | 0.1   | 9.72 |               |
| 3   | Q9HMMW9 Q9HMMW9 | 1 | 2637.1759 | 0.4  | 88    | 110 | 5  | 42.8  | 23 | T | GESTDYQPDFDKYPYGIDETKVA    | E | -1.3  | 3.68 |               |
| 4   | Q9HR99 Q9HR99   | 1 | 1419.6154 | -3.6 | 122   | 134 | 5  | 65.3  | 24 | V | DAGETLEHTFETA              | G | -0.7  | 3.68 |               |
| 4   | Q9HR99 Q9HR99   | 1 | 1473.6195 | -5.4 | 106   | 119 | 2  | 75.8  | 21 | A | SGFGTMDKDGNGQFA            | V | -0.8  | 3.88 |               |
| 4   | Q9HR99 Q9HR99   | 1 | 1491.7246 | -7.0 | 57    | 70  | 2  | 84.6  | 28 | A | VAPDGGGFKFEPSEL            | T | -0.3  | 3.82 |               |
| 4   | Q9HR99 Q9HR99   | 1 | 1562.7617 | -5.1 | 56    | 70  | 3  | 78.5  | 28 | I | AVAPDGGGFKFEPSEL           | T | -0.1  | 3.82 |               |
| 4   | Q9HR99 Q9HR99   | 1 | 1651.7664 | 7.1  | 91    | 105 | 3  | 55.8  | 27 | S | AWPDMHDKISIPDGA            | S | -0.6  | 4.16 |               |
| 4   | Q9HR99 Q9HR99   | 1 | 1671.7563 | -1.6 | 106   | 121 | 4  | 133.1 | 26 | A | SGFGTMDKDGNGQFAVV          | D | -0.2  | 3.88 |               |
| 4   | Q9HR99 Q9HR99   | 1 | 1687.7512 | -4.7 | 106   | 121 | 4  | 54.8  | 24 | A | SGFGTMDKDGNGQFAVV          | D | -0.2  | 3.88 | Oxidation (M) |
| 4   | Q9HR99 Q9HR99   | 1 | 1691.8407 | 0.9  | 57    | 72  | 4  | 105.2 | 28 | A | VAPDGGGFKFEPSELTV          | S | 0.0   | 3.82 |               |
| 4   | Q9HR99 Q9HR99   | 1 | 1762.8778 | -3.5 | 56    | 72  | 5  | 119.1 | 28 | I | AVAPDGGGFKFEPSELTV         | S | 0.1   | 3.82 |               |
| 4   | Q9HR99 Q9HR99   | 1 | 1849.9098 | -1.5 | 56    | 73  | 6  | 31.7  | 28 | I | AVAPDGGGFKFEPSELTVS        | V | 0.0   | 3.82 |               |
| 4   | Q9HR99 Q9HR99   | 1 | 1869.7905 | -0.4 | 122   | 138 | 6  | 149.6 | 22 | V | DAGETLEHTFETAGEYT          | Y | -0.9  | 3.58 |               |
| 4   | Q9HR99 Q9HR99   | 1 | 2064.9753 | 2.8  | 48    | 68  | 6  | 47.1  | 26 | A | SQSGGNTIAVAPDGGGFKFEPSEL   | E | -0.4  | 4.08 |               |
| 4   | Q9HR99 Q9HR99   | 1 | 2131.9222 | 7.6  | 122   | 140 | 7  | 152.5 | 24 | V | DAGETLEHTFETAGEYTYV        | C | -0.7  | 3.58 |               |
| 4   | Q9HR99 Q9HR99   | 1 | 2176.0007 | 11.1 | 86    | 105 | 6  | 118.8 | 26 | S | SHNVSAPDMDHDKISIPDGA       | S | -0.6  | 5.02 |               |
| 4   | Q9HR99 Q9HR99   | 1 | 2205.0954 | 5.3  | 51    | 72  | 7  | 45.8  | 27 | S | GGNTIAVAPDGGGFKFEPSELTV    | S | 0.0   | 3.82 |               |
| 4   | Q9HR99 Q9HR99   | 1 | 2212.0107 | 4.0  | 100   | 121 | 6  | 56.4  | 26 | I | SIPDGASGFGTMDKDGNGQFAVV    | D | -0.1  | 3.6  |               |
| 4   | Q9HR99 Q9HR99   | 1 | 2307.1019 | 5.5  | 48    | 70  | 7  | 104.2 | 26 | A | SQSGGNTIAVAPDGGGFKFEPSEL   | T | -0.3  | 3.82 |               |
| 4   | Q9HR99 Q9HR99   | 1 | 2507.218  | 5.4  | 48    | 72  | 9  | 128.2 | 25 | A | SQSGGNTIAVAPDGGGFKFEPSELTV | S | -0.2  | 3.82 |               |
| 5   | Q9HMI3 Q9HMI3   | 1 | 1172.619  | -5.7 | 556   | 566 | 3  | 53.9  | 28 | V | GGPFLDRVELA                | - | 0.2   | 4.08 |               |
| 5   | Q9HMI3 Q9HMI3   | 1 | 1248.6615 | -3.7 | 181   | 190 | 1  | 32.1  | 27 | T | QQYAPFLRNL                 | A | -0.6  | 9.84 |               |
| 5   | Q9HMI3 Q9HMI3   | 1 | 1319.6986 | -2.2 | 181   | 191 | 2  | 36.9  | 27 | T | QQYAPFLRNL                 | I | -0.4  | 9.84 |               |
| 5   | Q9HMI3 Q9HMI3   | 1 | 1358.7194 | -4.9 | 554   | 566 | 5  | 64.0  | 28 | T | SVGGPFLDRVELA              | - | 0.5   | 4.08 |               |
| 5   | Q9HMI3 Q9HMI3   | 1 | 1475.7157 | -0.9 | 390   | 402 | 2  | 61.1  | 28 | A | TFSNPRGYNPNI               | Q | -1.2  | 9.84 |               |
| 5   | Q9HMI3 Q9HMI3   | 1 | 1554.7103 | 1.4  | 237   | 250 | 3  | 45.1  | 26 | V | RLTAFDDYWGAPS              | V | -0.5  | 3.88 |               |
| 5   | Q9HMI3 Q9HMI3   | 1 | 1577.8202 | -2.9 | 178   | 190 | 3  | 59.0  | 27 | I | DLTQQYAPFLRNL              | A | -0.5  | 6.7  |               |
| 5   | Q9HMI3 Q9HMI3   | 1 | 1648.8573 | -5.1 | 178   | 191 | 4  | 50.7  | 27 | I | DLTQQYAPFLRNL              | I | -0.3  | 6.7  |               |
| 5   | Q9HMI3 Q9HMI3   | 1 | 1696.8056 | -0.3 | 331   | 345 | 5  | 30.1  | 27 | I | NRDEIVDSIYQGFAA            | S | -0.3  | 3.7  |               |
| 5   | Q9HMI3 Q9HMI3   | 1 | 1793.8221 | 3.7  | 222   | 236 | 2  | 102.8 | 26 | T | GPFEFDQLDNETQRV            | R | -1.2  | 3.58 |               |
| 5   | Q9HMI3 Q9HMI3   | 1 | 1808.9309 | 17.6 | 78    | 93  | 6  | 102.9 | 26 | V | TNQIFDTLIQFKPGTS           | G | -0.3  | 6.76 |               |
| 5   | Q9HMI3 Q9HMI3   | 1 | 1951.8912 | 1.1  | 220   | 236 | 3  | 140.2 | 26 | V | GTGPFEFDQLDNETQRV          | R | -1.1  | 3.58 |               |
| 5   | Q9HMI3 Q9HMI3   | 1 | 1994.9585 | -4.4 | 460   | 477 | 5  | 89.1  | 27 | V | LLHPGTDIDVDPADQNYI         | A | -0.4  | 3.42 |               |
| 5   | Q9HMI3 Q9HMI3   | 1 | 2209.1267 | -2.9 | 78    | 97  | 8  | 94.8  | 26 | V | TNQIFDTLIQFKPGTSGELT       | S | -0.3  | 4.08 |               |
| 5   | Q9HMI3 Q9HMI3   | 1 | 2296.1587 | -6.4 | 78    | 98  | 9  | 111.5 | 26 | V | TNQIFDTLIQFKPGTSGELTS      | G | -0.3  | 4.08 |               |
| 5   | Q9HMI3 Q9HMI3   | 1 | 2310.1339 | 1.6  | 198   | 219 | 9  | 64.2  | 26 | I | LSRDQIESLGADAQPELGTDPV     | G | -0.5  | 3.42 |               |

| hit | accession     | z | mass      | ppm   | start | end | mc | score | id | - | sequence                       | + | gravy | pl   | modification             |
|-----|---------------|---|-----------|-------|-------|-----|----|-------|----|---|--------------------------------|---|-------|------|--------------------------|
| 5   | Q9HMI3 Q9HMI3 | 1 | 3202.4691 | 5.2   | 207   | 236 | 8  | 72.6  | 21 | L | GADAQPELGTDPVGTGPFEDQLDNETQRV  | R | -0.9  | 3.28 |                          |
| 6   | Q48302 Q48302 | 1 | 904.5059  | -11.4 | 82    | 89  | 2  | 33.8  | 26 | V | VFVPTPF                        | - | 1.8   | 6.02 |                          |
| 6   | Q48302 Q48302 | 1 | 908.4352  | -10.1 | 40    | 48  | 2  | 30.6  | 26 | A | GYAERGIGS                      | A | -0.6  | 6.88 |                          |
| 6   | Q48302 Q48302 | 1 | 979.4723  | -5.6  | 40    | 49  | 3  | 47.4  | 26 | A | GYAERGIGSA                     | A | -0.3  | 6.88 |                          |
| 6   | Q48302 Q48302 | 1 | 1012.5375 | -0.3  | 18    | 27  | 3  | 45.6  | 26 | S | NMPAITPKAA                     | A | 0.1   | 10.1 |                          |
| 6   | Q48302 Q48302 | 1 | 1050.5094 | 1.8   | 39    | 49  | 4  | 50.1  | 27 | A | AGYAERGIGSA                    | A | -0.1  | 6.88 |                          |
| 6   | Q48302 Q48302 | 1 | 1149.5778 | -2.2  | 40    | 51  | 5  | 63.8  | 28 | A | GYAERGIGSAAV                   | G | 0.2   | 6.88 |                          |
| 6   | Q48302 Q48302 | 1 | 1156.591  | -1.7  | 16    | 27  | 4  | 54.2  | 27 | T | GSNMPAITPKAA                   | A | -0.1  | 10.1 |                          |
| 6   | Q48302 Q48302 | 1 | 1163.5935 | 2.1   | 37    | 48  | 5  | 30.4  | 27 | A | LAAGYAERGIGS                   | A | 0.2   | 6.88 |                          |
| 6   | Q48302 Q48302 | 1 | 1172.5859 | -0.9  | 16    | 27  | 4  | 31.8  | 28 | T | GSNMPAITPKAA                   | A | -0.1  | 10.1 | Oxidation (M)            |
| 6   | Q48302 Q48302 | 1 | 1220.6149 | -4.8  | 39    | 51  | 6  | 54.4  | 28 | A | AGYAERGIGSAAV                  | G | 0.4   | 6.88 |                          |
| 6   | Q48302 Q48302 | 1 | 1234.6306 | -0.8  | 36    | 48  | 6  | 60.9  | 28 | A | ALAAGYAERGIGS                  | A | 0.3   | 6.88 |                          |
| 6   | Q48302 Q48302 | 1 | 1234.6306 | -2.8  | 37    | 49  | 6  | 68.2  | 28 | A | LAAGYAERGIGSA                  | A | 0.3   | 6.88 |                          |
| 6   | Q48302 Q48302 | 1 | 1277.6364 | -0.9  | 40    | 53  | 6  | 103.4 | 28 | A | GYAERGIGSAAVGA                 | I | 0.3   | 6.88 |                          |
| 6   | Q48302 Q48302 | 1 | 1305.6677 | 2.4   | 36    | 49  | 7  | 72.1  | 28 | A | ALAAGYAERGIGSA                 | A | 0.4   | 6.88 |                          |
| 6   | Q48302 Q48302 | 1 | 1348.6735 | -0.3  | 39    | 53  | 7  | 95.6  | 28 | A | AGYAERGIGSAAVGA                | I | 0.4   | 6.88 |                          |
| 6   | Q48302 Q48302 | 1 | 1359.6922 | -0.2  | 54    | 66  | 5  | 29.3  | 29 | A | IAEDPDLFGTGLI                  | L | 0.6   | 2.88 |                          |
| 6   | Q48302 Q48302 | 1 | 1386.6813 | -1.9  | 14    | 27  | 5  | 47.5  | 28 | A | ETGSNMPAITPKAA                 | A | -0.4  | 6.94 |                          |
| 6   | Q48302 Q48302 | 1 | 1457.7184 | -10.2 | 13    | 27  | 6  | 101.0 | 28 | L | AETGSNMPAITPKAA                | A | -0.2  | 6.94 |                          |
| 6   | Q48302 Q48302 | 1 | 1473.7133 | -1.8  | 13    | 27  | 6  | 38.4  | 28 | L | AETGSNMPAITPKAA                | A | -0.2  | 6.94 | Oxidation (M)            |
| 6   | Q48302 Q48302 | 1 | 1475.7732 | -4.6  | 36    | 51  | 9  | 49.2  | 28 | A | ALAAGYAERGIGSAAV               | G | 0.8   | 6.88 |                          |
| 6   | Q48302 Q48302 | 1 | 1683.8865 | -3.9  | 11    | 27  | 8  | 110.4 | 27 | T | ILAETGSNMPAITPKAA              | A | 0.3   | 6.94 |                          |
| 6   | Q48302 Q48302 | 1 | 1699.8814 | 1.6   | 11    | 27  | 8  | 33.7  | 28 | T | ILAETGSNMPAITPKAA              | A | 0.3   | 6.94 | Oxidation (M)            |
| 7   | Q9HN93 Q9HN93 | 1 | 1239.5156 | -6.1  | 118   | 128 | 1  | 77.7  | 21 | A | DWGGHDPIENT                    | G | -1.5  | 3.7  |                          |
| 7   | Q9HN93 Q9HN93 | 1 | 1332.6099 | -2.1  | 98    | 108 | 4  | 38.4  | 27 | V | SFEWVSNTHNI                    | L | -0.5  | 5.12 |                          |
| 7   | Q9HN93 Q9HN93 | 1 | 1398.6528 | -0.8  | 206   | 217 | 2  | 39.5  | 26 | V | SYRRTAPDSS                     | G | -1.6  | 9.58 |                          |
| 7   | Q9HN93 Q9HN93 | 1 | 1564.7481 | -6.4  | 103   | 117 | 6  | 51.3  | 28 | V | SNTHNILIDAPDGA                 | D | -0.5  | 3.88 |                          |
| 7   | Q9HN93 Q9HN93 | 1 | 1610.7002 | 1.7   | 38    | 53  | 4  | 96.9  | 25 | A | QAYDGFSGDAKGGAV                | G | -0.4  | 3.88 | Gln->pyro-Glu (N-term Q) |
| 7   | Q9HN93 Q9HN93 | 1 | 1711.7479 | -2.3  | 129   | 143 | 5  | 73.1  | 25 | T | GFTHTFTDTEGVYT                 | Y | -0.6  | 5.04 |                          |
| 7   | Q9HN93 Q9HN93 | 1 | 1761.737  | 6.6   | 240   | 254 | 2  | 54.0  | 23 | A | FEPDTELGHDEYDPV                | G | -1.3  | 3.38 |                          |
| 7   | Q9HN93 Q9HN93 | 1 | 2213.0389 | 4.4   | 98    | 117 | 8  | 147.7 | 26 | V | SFEWVSNTHNILIDAPDGA            | D | -0.3  | 3.7  |                          |
| 7   | Q9HN93 Q9HN93 | 1 | 2418.0401 | 5.8   | 38    | 61  | 7  | 176.6 | 23 | A | QAYDGFSGDAKGGAVNGYDGGTV        | D | -0.5  | 3.6  | Gln->pyro-Glu (N-term Q) |
| 7   | Q9HN93 Q9HN93 | 1 | 2583.1726 | 4.9   | 62    | 87  | 9  | 52.4  | 24 | V | DRTGTDEVTIDVGVNDANGNYGFGPA     | A | -0.4  | 3.36 |                          |
| 7   | Q9HN93 Q9HN93 | 1 | 2790.2158 | 2.1   | 38    | 64  | 8  | 199.1 | 21 | A | QAYDGFSGDAKGGAVGNYDGGTVDR      | G | -0.8  | 3.88 | Gln->pyro-Glu (N-term Q) |
| 7   | Q9HN93 Q9HN93 | 1 | 3444.5018 | -2.8  | 206   | 237 | 6  | 41.2  | 18 | V | SYRRTAPDSSGAFDYEPGGDTDDQPAIPEA | D | -1.2  | 3.58 |                          |
| 8   | Q9HRQ9 Q9HRQ9 | 1 | 1398.6681 | -6.8  | 102   | 113 | 3  | 57.9  | 26 | V | KVVWEGSTGHN                    | H | -0.8  | 7.82 |                          |
| 8   | Q9HRQ9 Q9HRQ9 | 1 | 1497.7576 | -3.5  | 78    | 91  | 3  | 50.7  | 28 | T | VKVPNNQNVFDPA                  | E | -0.6  | 6.76 |                          |
| 8   | Q9HRQ9 Q9HRQ9 | 1 | 1626.8002 | -1.5  | 79    | 93  | 3  | 90.2  | 27 | V | KVGPNNQNVFDPAEV                | Y | -0.8  | 4.08 |                          |
| 8   | Q9HRQ9 Q9HRQ9 | 1 | 1674.8148 | 0.5   | 175   | 191 | 1  | 100.5 | 28 | S | GGGGPVERSPHEMGVPI              | Q | -0.4  | 5.3  |                          |
| 8   | Q9HRQ9 Q9HRQ9 | 1 | 1707.8118 | 4.3   | 102   | 116 | 5  | 104.8 | 28 | V | KVVWEGSTGHN                    | S | -0.8  | 7.96 |                          |

| hit | accession     | z | mass      | ppm   | start | end | mc | score | id | - | sequence                     | + | gravy | pI   | modification  |
|-----|---------------|---|-----------|-------|-------|-----|----|-------|----|---|------------------------------|---|-------|------|---------------|
| 8   | Q9HRQ9 Q9HRQ9 | 1 | 1725.8686 | -0.6  | 78    | 93  | 4  | 84.3  | 27 | T | VKVGPNQNVFDPAEV              | Y | -0.4  | 4.08 |               |
| 8   | Q9HRQ9 Q9HRQ9 | 1 | 1873.9105 | -1.0  | 175   | 193 | 2  | 88.5  | 28 | S | GGGGPVERSPHEMGVPIQA          | H | -0.5  | 5.3  |               |
| 8   | Q9HRQ9 Q9HRQ9 | 1 | 1955.0112 | 2.0   | 76    | 93  | 5  | 73.2  | 27 | T | KTVKVGPNQNVFDPAEV            | Y | -0.7  | 6.98 |               |
| 8   | Q9HRQ9 Q9HRQ9 | 1 | 2306.0716 | -13.4 | 102   | 122 | 7  | 96.1  | 25 | V | KWVWEGSTGHNHATSVPDEA         | G | -0.7  | 5.18 |               |
| 8   | Q9HRQ9 Q9HRQ9 | 1 | 2445.1812 | 8.3   | 79    | 101 | 6  | 87.2  | 26 | V | KVGPNNQNVFDPAEVYVSPGDTV      | K | -0.5  | 3.7  |               |
| 8   | Q9HRQ9 Q9HRQ9 | 1 | 2526.1928 | -3.8  | 94    | 116 | 8  | 33.5  | 25 | V | YVSPGDTVKWWWEGSTGHNHAT       | S | -0.5  | 6.02 |               |
| 8   | Q9HRQ9 Q9HRQ9 | 1 | 2544.2497 | -4.2  | 78    | 101 | 7  | 47.9  | 26 | T | VKVGPNQNVFDPAEVYVSPGDTV      | K | -0.3  | 3.7  |               |
| 10  | Q9HHN1 Q9HHN1 | 1 | 1534.6949 | 3.6   | 421   | 434 | 2  | 95.8  | 27 | S | EPMIPWNSGGVFMA               | S | 0.3   | 3.3  |               |
| 10  | Q9HHN1 Q9HHN1 | 1 | 1571.674  | -1.9  | 395   | 407 | 2  | 37.0  | 23 | T | FRDLNDEYDLGDT                | S | -1.3  | 3.36 |               |
| 10  | Q9HHN1 Q9HHN1 | 1 | 2038.9881 | -2.9  | 166   | 185 | 8  | 40.6  | 27 | A | GAILSGVYMGDKQSPLSDTT         | L | -0.1  | 3.88 |               |
| 10  | Q9HHN1 Q9HHN1 | 1 | 2045.9728 | 5.2   | 411   | 428 | 6  | 81.0  | 27 | S | RTLEETGTVSEPMIPWNS           | G | -0.7  | 3.96 |               |
| 10  | Q9HHN1 Q9HHN1 | 1 | 2169.9889 | 9.9   | 389   | 407 | 4  | 49.3  | 26 | I | VIPGMTFRDLNDEYDLGDT          | S | -0.5  | 3.36 |               |
| 10  | Q9HHN1 Q9HHN1 | 1 | 2283.0729 | -4.8  | 388   | 407 | 5  | 59.9  | 26 | S | IVIPGMTFRDLNDEYDLGDT         | S | -0.3  | 3.36 |               |
| 10  | Q9HHN1 Q9HHN1 | 1 | 2608.2302 | 0.7   | 411   | 434 | 8  | 152.4 | 25 | S | RTLEETGTVSEPMIPWNSGGVFMA     | S | -0.1  | 3.96 |               |
| 10  | Q9HHN1 Q9HHN1 | 1 | 2624.2251 | 1.6   | 411   | 434 | 8  | 56.4  | 24 | S | RTLEETGTVSEPMIPWNSGGVFMA     | S | -0.1  | 3.96 | Oxidation (M) |
| 10  | Q9HHN1 Q9HHN1 | 1 | 2907.2943 | 2.9   | 383   | 407 | 6  | 68.0  | 22 | A | DQYMSIVIPGMTFRDLNDEYDLGDT    | S | -0.5  | 3.26 |               |
| 11  | Q9HMG3 Q9HMG3 | 1 | 1037.5254 | 8.9   | 35    | 43  | 3  | 48.2  | 26 | I | AQDVLEHRA                    | S | -0.7  | 5.22 |               |
| 11  | Q9HMG3 Q9HMG3 | 1 | 1737.7846 | -1.0  | 44    | 58  | 3  | 117.7 | 25 | A | STVPETDFPEPYNRS              | I | -1.4  | 3.82 |               |
| 11  | Q9HMG3 Q9HMG3 | 1 | 1874.9486 | -9.3  | 27    | 43  | 6  | 28.8  | 28 | S | SKPPAEDIAQDVLEHRA            | S | -0.9  | 4.54 |               |
| 11  | Q9HMG3 Q9HMG3 | 1 | 2207.0131 | 1.1   | 44    | 65  | 5  | 85.0  | 26 | A | STVPETDFPEPYNRSIGGGGGA       | G | -0.7  | 3.82 |               |
| 11  | Q9HMG3 Q9HMG3 | 1 | 2335.0717 | -1.4  | 44    | 67  | 6  | 107.0 | 25 | A | STVPETDFPEPYNRSIGGGGAGAGA    | V | -0.6  | 3.82 |               |
| 11  | Q9HMG3 Q9HMG3 | 1 | 2434.1401 | 4.2   | 44    | 68  | 7  | 63.2  | 25 | A | STVPETDFPEPYNRSIGGGGAGAV     | A | -0.4  | 3.82 |               |
| 11  | Q9HMG3 Q9HMG3 | 1 | 2505.1772 | 3.0   | 44    | 69  | 8  | 107.0 | 25 | A | STVPETDFPEPYNRSIGGGGAGAVA    | G | -0.3  | 3.82 |               |
| 11  | Q9HMG3 Q9HMG3 | 1 | 2690.2573 | 1.8   | 44    | 72  | 9  | 60.5  | 25 | A | STVPETDFPEPYNRSIGGGGAGAVAGGA | E | -0.3  | 3.82 |               |
| 11  | Q9HMG3 Q9HMG3 | 1 | 2757.2994 | -6.9  | 35    | 58  | 7  | 46.0  | 24 | I | AQDVLEHRASTVPETDFPEPYNRS     | I | -1.1  | 4.28 |               |
| 12  | Q9HRS0 Q9HRS0 | 1 | 1286.6156 | -0.9  | 119   | 129 | 2  | 52.0  | 28 | V | RFVWESGGHNV                  | H | -0.5  | 7.84 |               |
| 12  | Q9HRS0 Q9HRS0 | 1 | 1327.6408 | -4.9  | 145   | 156 | 3  | 85.7  | 27 | T | DIAGPPKEYTHT                 | F | -1.2  | 5.22 |               |
| 12  | Q9HRS0 Q9HRS0 | 1 | 1475.6067 | -1.2  | 219   | 230 | 0  | 64.6  | 20 | A | YFFMKYGGDYGE                 | - | -0.7  | 4.08 |               |
| 12  | Q9HRS0 Q9HRS0 | 1 | 1595.7593 | 0.1   | 119   | 132 | 4  | 58.1  | 27 | V | RFVWESGGHNVHAT               | E | -0.6  | 8    |               |
| 12  | Q9HRS0 Q9HRS0 | 1 | 1917.8956 | -1.5  | 183   | 200 | 4  | 84.7  | 26 | V | TDSPPENKGYQTIVPDSA           | K | -1.1  | 3.7  |               |
| 12  | Q9HRS0 Q9HRS0 | 1 | 2147.0382 | -2.2  | 183   | 202 | 5  | 30.2  | 27 | V | TDSPPENKGYQTIVPDSAKT         | M | -1.3  | 4.3  |               |
| 12  | Q9HRS0 Q9HRS0 | 1 | 2541.166  | 1.4   | 133   | 156 | 7  | 45.0  | 24 | T | EVPGDADWGVSTDIAGPPKEYTHT     | F | -0.8  | 3.84 |               |
| 12  | Q9HRS0 Q9HRS0 | 1 | 2570.1602 | -12.0 | 145   | 167 | 5  | 70.5  | 22 | T | DIAGPPKEYTHTFDGPTGEYNYV      | C | -1.0  | 4.06 |               |
| 12  | Q9HRS0 Q9HRS0 | 1 | 2809.2845 | 3.0   | 119   | 144 | 8  | 61.0  | 24 | V | RFVWESGGHNVHATEVPGDADWGVST   | D | -0.5  | 4.52 |               |
| 13  | Q9HRL3 Q9HRL3 | 1 | 1103.5651 | -7.9  | 586   | 595 | 3  | 62.8  | 29 | A | WLLYSGPAPT                   | K | 0.2   | 5.92 |               |
| 13  | Q9HRL3 Q9HRL3 | 1 | 1311.6169 | 2.4   | 274   | 285 | 1  | 77.5  | 26 | T | WLPDAMEGPTPV                 | S | -0.2  | 3    |               |
| 13  | Q9HRL3 Q9HRL3 | 1 | 1749.7707 | -1.9  | 478   | 493 | 3  | 29.3  | 25 | T | FHGEPKSDTAEDPHGV             | R | -1.4  | 4.52 |               |
| 13  | Q9HRL3 Q9HRL3 | 1 | 1845.9221 | -3.5  | 631   | 648 | 7  | 28.9  | 28 | A | RGADTFDQGVIDGIVNAV           | S | 0.2   | 3.6  |               |
| 13  | Q9HRL3 Q9HRL3 | 1 | 1876.9472 | -3.7  | 524   | 540 | 6  | 87.9  | 28 | T | GLHIEFLHTWLAGPEGT            | A | 0.1   | 5.12 |               |
| 13  | Q9HRL3 Q9HRL3 | 1 | 1916.9592 | -2.6  | 630   | 648 | 8  | 58.8  | 28 | L | ARGADTFDQGVIDGIVNAV          | S | 0.3   | 3.6  |               |

| hit | accession     | z | mass      | ppm   | start | end | mc | score | id | - | sequence                  | + | gravy | pl    | modification |
|-----|---------------|---|-----------|-------|-------|-----|----|-------|----|---|---------------------------|---|-------|-------|--------------|
| 13  | Q9HRL3 Q9HRL3 | 1 | 1977.9949 | -19.5 | 523   | 540 | 7  | 105.1 | 27 | A | TGLHIEFLHTWLAGPEGT        | A | 0.1   | 5.12  |              |
| 13  | Q9HRL3 Q9HRL3 | 1 | 2106.0245 | -4.6  | 267   | 285 | 4  | 41.3  | 27 | S | AQFPLHTWLPDAMEGPTPV       | S | -0.1  | 4.06  |              |
| 14  | Q9HN95 Q9HN95 | 1 | 940.5018  | 5.1   | 454   | 463 | 1  | 65.8  | 25 | V | LAPGSPGFV                 | - | 0.6   | 6.02  |              |
| 14  | Q9HN95 Q9HN95 | 1 | 1139.5764 | -7.2  | 31    | 40  | 2  | 75.7  | 27 | T | FYPPLQAHPA                | F | -0.3  | 7.76  |              |
| 14  | Q9HN95 Q9HN95 | 1 | 1296.631  | 0.9   | 69    | 79  | 1  | 39.9  | 27 | A | DNPDERIPLQT               | F | -1.6  | 3.7   |              |
| 14  | Q9HN95 Q9HN95 | 1 | 1403.6874 | -2.0  | 29    | 40  | 3  | 42.0  | 28 | L | YTFYPPPLQAHPA             | F | -0.4  | 7.7   |              |
| 14  | Q9HN95 Q9HN95 | 1 | 1450.8224 | -0.3  | 140   | 151 | 5  | 44.5  | 24 | A | YLAWYTIPLPKLA             | G | 0.8   | 9.52  |              |
| 14  | Q9HN95 Q9HN95 | 1 | 1516.7714 | -4.5  | 28    | 40  | 4  | 87.6  | 28 | V | LYTFYPPPLQAHPA            | F | -0.1  | 7.7   |              |
| 14  | Q9HN95 Q9HN95 | 1 | 1729.8828 | -3.6  | 26    | 40  | 5  | 58.0  | 28 | A | NVLYTFYPPPLQAHPA          | F | 0.0   | 7.7   |              |
| 14  | Q9HN95 Q9HN95 | 1 | 2062.9901 | 1.4   | 176   | 193 | 3  | 62.7  | 27 | V | GFHHQYTDPGIAEGFKFI        | A | -0.4  | 6.02  |              |
| 15  | Q9HND8 VATI   | 1 | 1332.631  | -3.1  | 364   | 374 | 2  | 44.7  | 27 | I | NRPQYTEIDPT               | V | -1.8  | 4.08  |              |
| 15  | Q9HND8 VATI   | 1 | 1445.715  | -3.9  | 363   | 374 | 3  | 52.3  | 28 | V | INRPQYTEIDPT              | V | -1.3  | 4.08  |              |
| 15  | Q9HND8 VATI   | 1 | 1530.7678 | -4.5  | 364   | 376 | 4  | 44.1  | 28 | I | NRPQYTEIDPTVV             | L | -0.9  | 4.08  |              |
| 15  | Q9HND8 VATI   | 1 | 1673.826  | -1.1  | 361   | 374 | 4  | 73.3  | 28 | T | EVINRPQYTEIDPT            | V | -1.1  | 3.82  |              |
| 15  | Q9HND8 VATI   | 1 | 1871.9629 | -2.7  | 361   | 376 | 6  | 82.0  | 28 | T | EVINRPQYTEIDPTVV          | L | -0.4  | 3.82  |              |
| 15  | Q9HND8 VATI   | 1 | 2086.0946 | -5.8  | 359   | 376 | 8  | 48.6  | 27 | S | LTEVINRPQYTEIDPTVV        | L | -0.2  | 3.82  |              |
| 16  | Q9HRL1 Q9HRL1 | 1 | 1517.7878 | -0.8  | 335   | 347 | 7  | 52.8  | 28 | I | NSALSLFYYSRVV             | K | 0.6   | 9.58  |              |
| 16  | Q9HRL1 Q9HRL1 | 1 | 1557.7675 | -1.6  | 350   | 362 | 5  | 33.1  | 28 | A | LWIEDPRDDL SLS            | G | -0.5  | 3.5   |              |
| 16  | Q9HRL1 Q9HRL1 | 1 | 1940.948  | -0.6  | 350   | 366 | 6  | 58.2  | 27 | A | LWIEDPRDDL SLSGQPT        | G | -0.8  | 3.5   |              |
| 16  | Q9HRL1 Q9HRL1 | 1 | 2070.984  | -2.2  | 131   | 149 | 2  | 52.4  | 27 | A | SVPFHFWAPEAYEGAPAPV       | S | 0.1   | 4.24  |              |
| 16  | Q9HRL1 Q9HRL1 | 1 | 2142.0211 | -0.8  | 130   | 149 | 3  | 134.1 | 26 | T | ASVPFHFWAPEAYEGAPAPV      | S | 0.2   | 4.24  |              |
| 17  | Q9HM69 CSG    | 1 | 1186.6081 | -20.2 | 716   | 726 | 5  | 28.4  | 28 | V | ELLQGDASIEI               | N | 0.3   | 2.94  |              |
| 17  | Q9HM69 CSG    | 1 | 1308.7877 | 4.2   | 840   | 852 | 9  | 54.4  | 19 | V | AVLGAALLALRQN             | - | 1.1   | 11.04 |              |
| 17  | Q9HM69 CSG    | 1 | 1909.8541 | 9.4   | 598   | 614 | 6  | 43.8  | 26 | T | FDEEDIDISELRQGSAS         | A | -0.8  | 3.38  |              |
| 17  | Q9HM69 CSG    | 1 | 2542.0831 | 12.0  | 591   | 613 | 9  | 73.9  | 22 | I | SVSDDTFDEEDIDISELRQGSA    | S | -1.0  | 3.12  |              |
| 17  | Q9HM69 CSG    | 1 | 2762.2267 | 6.9   | 746   | 770 | 7  | 24.5  | 23 | S | NVEPGNYTVEADDGDNTDRQNVEIV | E | -1.1  | 3.28  |              |
| 18  | Q9HMF1 Q9HMF1 | 1 | 1198.5982 | -7.7  | 160   | 169 | 1  | 71.4  | 27 | V | RLEGELPEWA                | T | -0.9  | 3.96  |              |
| 18  | Q9HMF1 Q9HMF1 | 1 | 1411.7095 | -0.6  | 158   | 169 | 2  | 70.8  | 27 | V | NVRLEGELPEWA              | T | -0.7  | 3.96  |              |
| 18  | Q9HMF1 Q9HMF1 | 1 | 1664.7682 | -3.6  | 222   | 235 | 5  | 27.2  | 26 | S | SIFPTDDRTEDWLA            | R | -0.7  | 3.5   |              |
| 18  | Q9HMF1 Q9HMF1 | 1 | 1832.9156 | 1.6   | 192   | 208 | 6  | 30.5  | 28 | V | LEYTGPVSVLSPERT           | T | -0.4  | 3.96  |              |
| 18  | Q9HMF1 Q9HMF1 | 1 | 2193.0073 | 1.6   | 581   | 599 | 6  | 52.7  | 26 | L | NIDEETYARIEQGDDVEVV       | D | -0.8  | 3.32  |              |
| 19  | Q9HSA8 Q9HSA8 | 1 | 953.4971  | 9.1   | 61    | 68  | 1  | 37.6  | 25 | V | FGEYRGLL                  | E | 0.0   | 6.88  |              |
| 19  | Q9HSA8 Q9HSA8 | 1 | 1274.5965 | 0.0   | 83    | 92  | 3  | 41.6  | 27 | T | YTFDMRTQTI                | D | -0.6  | 6.7   |              |
| 19  | Q9HSA8 Q9HSA8 | 1 | 1349.6979 | -2.0  | 61    | 72  | 2  | 27.3  | 27 | V | FGEYRGLLEPGI              | N | -0.1  | 4.26  |              |
| 19  | Q9HSA8 Q9HSA8 | 1 | 2203.1677 | 2.0   | 61    | 80  | 5  | 119.1 | 24 | V | FGEYRGLLEPGINVIPFVS       | R | 0.4   | 4.26  |              |
| 20  | Q9HSS1 Q9HSS1 | 1 | 940.4866  | -2.6  | 249   | 258 | 4  | 35.7  | 25 | A | LGALEDGPV                 | S | 0.6   | 3     |              |
| 20  | Q9HSS1 Q9HSS1 | 1 | 1207.635  | -3.4  | 153   | 164 | 3  | 75.4  | 27 | V | GFVGFGEIARGV              | A | 0.9   | 6.98  |              |
| 20  | Q9HSS1 Q9HSS1 | 1 | 1232.6401 | -6.0  | 210   | 220 | 3  | 42.6  | 28 | V | FAPLTEETRGL               | V | -0.2  | 4.26  |              |
| 20  | Q9HSS1 Q9HSS1 | 1 | 1593.8151 | -0.8  | 149   | 164 | 6  | 57.8  | 27 | A | DATVGFVGFGEIARGV          | A | 0.8   | 4.08  |              |
| 20  | Q9HSS1 Q9HSS1 | 1 | 1646.8152 | -2.7  | 210   | 224 | 5  | 37.1  | 28 | V | FAPLTEETRGLVDEA           | A | -0.2  | 3.68  |              |

| hit | accession     | z | mass      | ppm   | start | end | mc | score | id | - | sequence                 | + | gravy | pl    | modification  |
|-----|---------------|---|-----------|-------|-------|-----|----|-------|----|---|--------------------------|---|-------|-------|---------------|
| 21  | Q9HMT7 Q9HMT7 | 1 | 1702.7322 | -0.9  | 44    | 59  | 5  | 127.6 | 23 | V | DVDTEAYEESHAPGAI         | G | -0.7  | 3.5   |               |
| 21  | Q9HMT7 Q9HMT7 | 1 | 2369.1751 | 4.1   | 178   | 199 | 6  | 64.7  | 26 | L | VDVRSPEEFSGEILAPPGLQET   | A | -0.4  | 3.58  |               |
| 21  | Q9HMT7 Q9HMT7 | 1 | 2564.0074 | 4.8   | 126   | 147 | 3  | 66.1  | 15 | L | DGGRDYWMDNDYPTSEEPPSFS   | A | -1.7  | 3.32  |               |
| 22  | Q9HMX1 Q9HMX1 | 1 | 1760.8329 | -1.8  | 111   | 126 | 4  | 53.3  | 27 | L | SRDVIPNQGYNDPSTV         | R | -1.0  | 3.88  |               |
| 22  | Q9HMX1 Q9HMX1 | 1 | 1987.0011 | 1.2   | 109   | 126 | 6  | 61.7  | 28 | T | LLSRDVIPNQGYNDPSTV       | R | -0.5  | 3.88  |               |
| 22  | Q9HMX1 Q9HMX1 | 1 | 2330.0146 | 0.6   | 497   | 519 | 7  | 43.6  | 22 | A | NALGDGIRDADPESEGGSEEEA   | A | -1.0  | 3.28  |               |
| 23  | Q9HMW4 Q9HMW4 | 1 | 1578.7467 | -1.8  | 402   | 415 | 2  | 47.1  | 27 | T | LHPTWGPYAPENPT           | T | -1.1  | 5.12  |               |
| 23  | Q9HMW4 Q9HMW4 | 1 | 2202.097  | -6.2  | 252   | 270 | 5  | 37.0  | 27 | A | AFNGNLGPWDLKRWSQQSV      | M | -0.8  | 10.08 |               |
| 23  | Q9HMW4 Q9HMW4 | 1 | 2393.0692 | -0.8  | 231   | 251 | 5  | 72.2  | 24 | A | KPYVEAEDADGLEQDEEV MRA   | A | -1.1  | 3.62  |               |
| 23  | Q9HMW4 Q9HMW4 | 1 | 2577.1904 | -5.4  | 229   | 251 | 7  | 35.5  | 24 | A | LAKPYVEAEDADGLEQDEEV MRA | A | -0.8  | 3.62  |               |
| 24  | Q9HHP3 Q9HHP3 | 1 | 1600.7594 | -3.8  | 228   | 241 | 4  | 50.5  | 28 | A | AVDPESGDQVWRRS           | L | -1.2  | 4.3   |               |
| 24  | Q9HHP3 Q9HHP3 | 1 | 1671.7965 | -2.1  | 227   | 241 | 5  | 38.2  | 27 | V | AAVDPESGDQVWRRS          | L | -1.0  | 4.3   |               |
| 24  | Q9HHP3 Q9HHP3 | 1 | 1911.8599 | 3.6   | 111   | 126 | 6  | 85.4  | 26 | T | SFDINENTRSWNVETT         | G | -1.2  | 3.82  |               |
| 25  | Q9HR04 Q9HR04 | 1 | 789.4232  | -22.5 | 16    | 24  | 6  | 30.0  | 28 | A | TGAATLSGL                | A | 0.9   | 6.02  |               |
| 25  | Q9HR04 Q9HR04 | 1 | 1239.6248 | -3.4  | 76    | 87  | 2  | 29.9  | 27 | S | IYLGGEGRYV               | A | 0.0   | 6.82  |               |
| 25  | Q9HR04 Q9HR04 | 1 | 1950.8344 | -1.3  | 94    | 109 | 4  | 60.9  | 23 | I | NQYYDDFSATQQTQRS         | S | -1.9  | 3.88  |               |
| 25  | Q9HR04 Q9HR04 | 1 | 2037.8664 | -1.0  | 94    | 110 | 5  | 22.4  | 22 | I | NQYYDDFSATQQTQRSS        | Q | -1.8  | 3.88  |               |
| 25  | Q9HR04 Q9HR04 | 1 | 2491.2442 | 6.1   | 52    | 75  | 7  | 52.7  | 25 | A | IVQERPAPGGESIADLPDLEGELS | I | -0.4  | 3.44  |               |
| 26  | Q9HM89 EF1A   | 1 | 1440.7937 | -6.2  | 235   | 249 | 6  | 34.7  | 26 | I | SGIGTVPVGRIETGV          | M | 0.5   | 6.98  |               |
| 26  | Q9HM89 EF1A   | 1 | 1521.71   | -5.7  | 165   | 178 | 2  | 50.6  | 27 | V | KDLFGQVGFNPDDA           | K | -0.6  | 3.6   |               |
| 26  | Q9HM89 EF1A   | 1 | 1764.8319 | 2.8   | 162   | 178 | 4  | 87.0  | 28 | V | SGVKDLFGQVGFNPDDA        | K | -0.3  | 3.6   |               |
| 27  | Q9HQF4 Q9HQF4 | 1 | 1538.7577 | -1.6  | 102   | 116 | 4  | 93.5  | 27 | A | TEDGDPSVPGPIVRT          | E | -0.7  | 3.7   |               |
| 27  | Q9HQF4 Q9HQF4 | 1 | 2168.9797 | 0.8   | 226   | 244 | 4  | 33.1  | 26 | S | MAGEDVDYSPRTRNPVFT       | V | -1.0  | 3.96  |               |
| 27  | Q9HQF4 Q9HQF4 | 1 | 2539.1926 | 0.4   | 102   | 125 | 7  | 57.1  | 25 | A | TEDGDPSVPGPIVRTEEGQDIEVT | L | -0.8  | 3.32  |               |
| 28  | Q9HQP2 Q9HQP2 | 1 | 799.4804  | 20.8  | 227   | 235 | 7  | 26.5  | 25 | S | VLAVATAV                 | Y | 2.3   | 6.02  |               |
| 28  | Q9HQP2 Q9HQP2 | 1 | 1263.6976 | -0.5  | 162   | 172 | 2  | 38.8  | 25 | L | GLLPYFLQRT               | L | 0.2   | 9.84  |               |
| 28  | Q9HQP2 Q9HQP2 | 1 | 1269.5778 | -19.5 | 208   | 217 | 2  | 32.1  | 24 | V | FEQFRAWDAT               | G | -0.7  | 4.08  |               |
| 28  | Q9HQP2 Q9HQP2 | 1 | 2104.9491 | 0.6   | 746   | 763 | 3  | 27.0  | 25 | V | VFYDGPRLDSQGDFYQQA       | Y | -0.9  | 3.6   |               |
| 29  | Q9HNL7 Q9HNL7 | 1 | 1920.9444 | 0.0   | 28    | 44  | 3  | 84.2  | 28 | S | AYWQPGEGMLVEKPFGI        | G | -0.1  | 4.26  |               |
| 29  | Q9HNL7 Q9HNL7 | 1 | 2451.2798 | 2.9   | 2     | 23  | 6  | 101.7 | 24 | M | VEKPTSGSLFGVPYNFERPKLS   | A | -0.5  | 9.62  |               |
| 30  | Q9HS12 Q9HS12 | 1 | 731.4694  | -15.4 | 23    | 28  | 3  | 32.0  | 21 | V | FRALLL                   | A | 1.9   | 11.04 |               |
| 30  | Q9HS12 Q9HS12 | 1 | 876.4263  | 24.2  | 511   | 518 | 4  | 48.2  | 27 | S | ETVTAMPL                 | Q | 0.7   | 3.3   | Oxidation (M) |
| 30  | Q9HS12 Q9HS12 | 1 | 974.5913  | 5.0   | 23    | 31  | 6  | 35.6  | 20 | V | FRALLAAT                 | L | 1.6   | 11.04 |               |
| 31  | Q9HRR0 Q9HRR0 | 1 | 1333.6051 | 3.3   | 7     | 17  | 1  | 55.2  | 27 | S | NYGDIHRYEPA              | S | -1.5  | 5.22  |               |
| 31  | Q9HRR0 Q9HRR0 | 1 | 1459.6653 | 1.0   | 109   | 120 | 3  | 64.1  | 27 | T | SMFENTVEQFKT             | A | -0.7  | 4.26  |               |
| 31  | Q9HRR0 Q9HRR0 | 1 | 1530.7024 | 3.9   | 109   | 121 | 4  | 78.9  | 27 | T | SMFENTVEQFKTA            | L | -0.5  | 4.26  |               |
| 32  | Q9HMX0 Q9HMX0 | 1 | 1880.9785 | 2.3   | 188   | 205 | 6  | 36.1  | 27 | S | NALQHLFSGIDPFAGVPV       | L | 0.6   | 4.94  |               |
| 32  | Q9HMX0 Q9HMX0 | 1 | 1968.0105 | 2.3   | 187   | 205 | 7  | 78.8  | 27 | T | SNALQHLFSGIDPFAGVPV      | L | 0.5   | 4.94  |               |
| 33  | Q9HRR1 Q9HRR1 | 1 | 1544.7583 | -5.9  | 177   | 189 | 4  | 30.5  | 28 | A | TWRSQNTDNTIPI            | L | -1.1  | 6.78  |               |
| 33  | Q9HRR1 Q9HRR1 | 1 | 2719.1198 | 13.6  | 151   | 174 | 4  | 124.0 | 20 | V | NIDEFDDYDTWENDYGDAGIGKPA | K | -1.3  | 3.16  |               |

| hit | accession     | z | mass      | ppm   | start | end | mc | score | id | - | sequence             | + | gravy | pl    | modification  |
|-----|---------------|---|-----------|-------|-------|-----|----|-------|----|---|----------------------|---|-------|-------|---------------|
| 34  | Q9HM85 EF2    | 1 | 1379.8024 | -3.0  | 614   | 625 | 6  | 38.8  | 23 | A | LIDADIRLLEPI         | Q | 0.8   | 3.7   |               |
| 34  | Q9HM85 EF2    | 1 | 1786.8407 | 18.2  | 155   | 169 | 3  | 67.9  | 28 | I | SELQEGPEEMQERLL      | S | -1.2  | 3.68  |               |
| 35  | Q9HP48 Q9HP48 | 1 | 1821.7694 | 6.5   | 204   | 220 | 5  | 74.7  | 23 | V | FESGVDHFEVDDDGALA    | A | -0.3  | 3.32  |               |
| 35  | Q9HP48 Q9HP48 | 1 | 1892.8065 | 2.0   | 204   | 221 | 6  | 53.6  | 23 | V | FESGVDHFEVDDDGALAA   | A | -0.1  | 3.32  |               |
| 36  | Q9HHR4 Q9HHR4 | 1 | 1340.818  | -0.9  | 235   | 247 | 6  | 24.3  | 20 | A | LIGVGYIIGPRIA        | A | 1.5   | 9.84  |               |
| 37  | Q9HNS6 Q9HNS6 | 1 | 1063.5815 | 10.7  | 71    | 81  | 3  | 30.2  | 24 | I | GFGPIVGPPIA          | F | 0.9   | 7.84  |               |
| 37  | Q9HNS6 Q9HNS6 | 1 | 1361.7456 | -5.9  | 68    | 81  | 5  | 98.4  | 26 | T | NAIGFGPIVGPPIA       | F | 0.9   | 7.84  |               |
| 38  | Q9HPG8 Q9HPG8 | 1 | 1317.6241 | 0.8   | 661   | 670 | 2  | 67.9  | 28 | V | EFDDYFLRTL           | E | -0.4  | 3.7   |               |
| 39  | Q9HP88 Q9HP88 | 1 | 1498.7126 | 0.7   | 171   | 183 | 4  | 77.5  | 27 | T | AFRDYASTDMLPL        | A | 0.0   | 3.88  |               |
| 39  | Q9HP88 Q9HP88 | 1 | 1689.9301 | -2.5  | 397   | 412 | 4  | 55.1  | 25 | I | LLPIAPGLDDTPEIRA     | Q | 0.2   | 3.7   |               |
| 41  | Q9HRU7 Q9HRU7 | 1 | 2158.1827 | -1.2  | 186   | 204 | 8  | 25.4  | 24 | T | VWLG YLDVIRPVFDALSPV | L | 1.0   | 3.88  |               |
| 42  | Q9HRJ5 Q9HRJ5 | 1 | 1243.6561 | -15.1 | 96    | 106 | 5  | 36.8  | 29 | A | TTPLSRAEWLA          | A | -0.1  | 6.98  |               |
| 43  | Q9HMS7 Q9HMS7 | 1 | 1167.5924 | -8.2  | 363   | 372 | 3  | 29.3  | 26 | S | AFTPERFSLT           | V | -0.1  | 6.98  |               |
| 44  | Q9HP84 HTR4   | 1 | 731.4582  | -4.6  | 324   | 330 | 3  | 29.2  | 21 | T | GILGFIL              | V | 2.7   | 6.02  |               |
| 45  | Q9HRL8 Q9HRL8 | 1 | 1015.5603 | 2.3   | 170   | 178 | 2  | 32.2  | 27 | A | GVRIPAWFA            | F | 0.9   | 11.04 |               |
| 45  | Q9HRL8 Q9HRL8 | 1 | 1826.8799 | -5.1  | 192   | 208 | 3  | 64.0  | 27 | A | NLAEVGRNPFDTPEAPT    | E | -0.8  | 3.82  |               |
| 46  | Q9HNY2 Q9HNY2 | 1 | 1026.5458 | 18.7  | 233   | 243 | 5  | 29.1  | 26 | T | VPGADASALRA          | G | 0.4   | 6.78  |               |
| 46  | Q9HNY2 Q9HNY2 | 1 | 1126.6234 | -16.4 | 230   | 241 | 7  | 29.2  | 26 | A | LITVPGADASAL         | R | 1.2   | 3.1   |               |
| 49  | Q9HRL2 Q9HRL2 | 1 | 1401.7041 | -7.1  | 244   | 256 | 2  | 78.2  | 28 | T | WLPDAHVQAPTPA        | S | -0.2  | 4.94  |               |
| 50  | Q9HPB1 SECY   | 1 | 1135.5696 | -0.9  | 421   | 429 | 1  | 47.3  | 27 | V | MERYIPQVT            | V | -0.5  | 6.88  |               |
| 53  | Q9HS26 Q9HS26 | 1 | 1711.7577 | 2.6   | 16    | 31  | 3  | 55.7  | 25 | A | GDDSEPEIDFYGGKLA     | S | -0.8  | 3.42  |               |
| 54  | Q9HRL9 Q9HRL9 | 1 | 1556.841  | -0.2  | 548   | 562 | 9  | 68.5  | 27 | V | ATLGSLDVLGEVDR       | - | 0.6   | 3.7   |               |
| 55  | Q9HPA9 Q9HPA9 | 1 | 930.4771  | -2.6  | 509   | 518 | 4  | 31.6  | 29 | A | QGNVGLSSGI           | T | 0.3   | 6.02  |               |
| 56  | Q9HQQ9 Q9HQQ9 | 1 | 2003.9622 | -1.7  | 350   | 367 | 6  | 32.8  | 27 | V | AYDPVAAEKMAEQRPEVT   | Y | -0.8  | 4.16  |               |
| 57  | Q9HR32 TOP6A  | 1 | 1459.7154 | 9.7   | 7     | 19  | 6  | 34.2  | 28 | T | SDETEARDQLLAI        | A | -0.6  | 3.58  |               |
| 57  | Q9HR32 TOP6A  | 1 | 2300.0419 | 2.5   | 20    | 39  | 3  | 44.0  | 25 | I | AEQFYDQFADGDIPRMSLPT | R | -0.6  | 3.5   |               |
| 58  | Q9HSM2 MUTS1  | 1 | 1156.6088 | 1.1   | 328   | 338 | 4  | 29.4  | 28 | A | RDALGDVLGEI          | Y | 0.2   | 3.7   |               |
| 60  | Q9HQ54 Q9HQ54 | 1 | 1227.6612 | -15.1 | 794   | 807 | 8  | 32.9  | 27 | S | AGGVALAGWGVVTA       | A | 1.5   | 6.02  |               |
| 61  | Q9HMU8 Q9HMU8 | 1 | 1186.671  | -7.0  | 47    | 56  | 4  | 79.6  | 26 | I | NILLDFVRPT           | T | 0.5   | 6.78  |               |
| 63  | Q9HN92 Q9HN92 | 1 | 955.5273  | -2.9  | 1     | 8   | 2  | 42.7  | 26 | - | MNVRPQVI             | A | 0.2   | 11.04 |               |
| 63  | Q9HN92 Q9HN92 | 1 | 971.5222  | -5.1  | 1     | 8   | 2  | 30.3  | 28 | - | MNVRPQVI             | A | 0.2   | 11.04 | Oxidation (M) |
| 63  | Q9HN92 Q9HN92 | 1 | 1026.5644 | 0.6   | 1     | 9   | 3  | 55.2  | 26 | - | MNVRPQVIA            | T | 0.4   | 11.04 |               |
| 66  | Q9HSM4 DHE42  | 1 | 1255.6925 | -3.7  | 241   | 251 | 5  | 57.3  | 27 | A | LLLDDWGARVV          | A | 0.8   | 3.88  |               |
| 68  | Q9HPQ2 Q9HPQ2 | 1 | 1402.6517 | -0.1  | 332   | 343 | 3  | 71.1  | 27 | A | YVVDNYGYSRPA         | T | -0.7  | 6.58  |               |
| 69  | Q9HMK1 Q9HMK1 | 1 | 762.4276  | -28.7 | 116   | 123 | 5  | 32.9  | 27 | A | AIALFGTA             | I | 1.9   | 6.02  |               |
| 69  | Q9HMK1 Q9HMK1 | 1 | 1311.6558 | -25.3 | 579   | 591 | 4  | 26.1  | 26 | T | IADLDDDLPGGVI        | I | 0.5   | 2.74  |               |
| 73  | Q9HRS4 Q9HRS4 | 1 | 2054.809  | 6.7   | 16    | 35  | 5  | 81.0  | 17 | A | AADQGIDPWTADDHEGGDGE | - | -1.3  | 3.22  |               |
| 74  | P25964 BACS1  | 1 | 1426.6187 | -1.9  | 219   | 231 | 1  | 29.5  | 24 | V | FMHSESPPAPEQA        | T | -0.9  | 4.24  |               |
| 76  | Q9HS86 Q9HS86 | 1 | 1261.5939 | -0.5  | 95    | 106 | 3  | 42.6  | 27 | I | AAGEFERADIPS         | S | -0.4  | 3.82  |               |
| 78  | P16102 BACH   | 1 | 962.5338  | 4.1   | 156   | 163 | 4  | 29.4  | 25 | T | SALLFRWA             | F | 1.0   | 11.04 |               |

| hit | accession       | z | mass      | ppm   | start | end | mc | score | id | - | sequence               | + | gravy | pl    | modification  |
|-----|-----------------|---|-----------|-------|-------|-----|----|-------|----|---|------------------------|---|-------|-------|---------------|
| 78  | P16102 BACH     | 1 | 1220.6401 | -1.6  | 191   | 201 | 5  | 33.8  | 27 | A | GTAEIFDTRLV            | L | 0.3   | 4.08  |               |
| 80  | Q9HS72 SECE     | 1 | 1605.8436 | -1.7  | 1     | 14  | 6  | 33.3  | 27 | - | MDVPLELSAYTRVL         | R | 0.5   | 4.08  |               |
| 82  | Q9HR22 Q9HR22   | 1 | 1658.8304 | 2.2   | 72    | 86  | 5  | 36.5  | 28 | V | YSELFLGAIGHPEQV        | L | 0.2   | 4.24  |               |
| 83  | Q9HHI2 Q9HHI2   | 1 | 731.4582  | -6.0  | 40    | 46  | 4  | 24.0  | 21 | L | IVFGAIL                | L | 3.0   | 6.02  |               |
| 83  | Q9HHI2 Q9HHI2   | 1 | 731.4582  | -4.6  | 41    | 47  | 4  | 24.1  | 21 | I | VFGAILL                | M | 2.9   | 6.02  |               |
| 84  | Q9HQ64 Q9HQ64   | 1 | 1716.8907 | -1.9  | 79    | 94  | 5  | 71.3  | 28 | V | YNALVNQGIIEGNAKRA      | A | -0.6  | 9.72  |               |
| 89  | Q9HSA0 Q9HSA0   | 1 | 1260.6251 | -2.2  | 39    | 50  | 2  | 52.5  | 28 | A | FEHGLPSGPHLA           | D | -0.2  | 6.02  |               |
| 90  | Q9HN43 CAPPA    | 1 | 930.4771  | -1.8  | 326   | 334 | 5  | 31.5  | 29 | L | AVIDRTADA              | Y | 0.2   | 3.88  |               |
| 90  | Q9HN43 CAPPA    | 1 | 1267.6561 | 11.5  | 308   | 319 | 2  | 45.9  | 26 | L | RDADLGAPPFPI           | D | -0.2  | 3.88  |               |
| 91  | Q9HN02 Q9HN02   | 1 | 1096.5917 | -0.8  | 163   | 171 | 4  | 52.0  | 25 | V | LFDYLTRAV              | N | 0.7   | 6.7   |               |
| 94  | Q9HNNQ9 Q9HNNQ9 | 1 | 1122.5094 | 7.9   | 209   | 218 | 2  | 44.0  | 26 | S | GGFWESVDRA             | M | -0.5  | 4.08  |               |
| 95  | Q9HMZ3 Q9HMZ3   | 1 | 2517.1237 | 3.8   | 413   | 432 | 4  | 53.9  | 24 | V | EYLWYVGDYPSYDERNQHIA   | R | -1.2  | 4.06  |               |
| 98  | Q9HHI3 Q9HHI3   | 1 | 1145.5088 | -12.1 | 69    | 79  | 4  | 32.6  | 23 | V | SLPDSVETDPS            | I | -0.8  | 2.88  |               |
| 99  | Q9HPM1 Q9HPM1   | 1 | 1026.5458 | 18.7  | 164   | 174 | 6  | 30.5  | 26 | I | ADGTRPAVAVA            | T | 0.4   | 6.78  |               |
| 102 | Q9HR62 Q9HR62   | 1 | 958.5964  | 20.2  | 21    | 29  | 5  | 14.1  | 14 | A | FRVGLAVVV              | L | 2.3   | 11.04 |               |
| 104 | Q9HPG5 TRPE1    | 1 | 940.4866  | 8.2   | 11    | 20  | 5  | 27.3  | 24 | T | ALADDGPAIV             | R | 0.9   | 2.92  |               |
| 105 | Q9HN22 Q9HN22   | 1 | 1719.8104 | 2.4   | 149   | 165 | 8  | 48.7  | 27 | A | AAFLADIDHSAYGTTPA      | Q | 0.3   | 3.88  |               |
| 115 | Q9HNY9 Q9HNY9   | 1 | 745.4446  | -18.0 | 121   | 127 | 3  | 27.1  | 24 | A | IAGTRKT                | T | -0.6  | 11.48 |               |
| 118 | Q9HSL1 Q9HSL1   | 1 | 1629.8111 | 4.1   | 123   | 140 | 2  | 32.4  | 28 | T | EYTGSGGGGGGRLPSLPV     | S | -0.3  | 6.88  |               |
| 119 | Q9HP01 Q9HP01   | 1 | 1123.6825 | -12.5 | 13    | 23  | 5  | 22.2  | 22 | V | GSPRARLAALL            | A | 0.5   | 12.4  |               |
| 122 | Q9HRS9 Q9HRS9   | 1 | 1311.6533 | -25.4 | 184   | 195 | 2  | 51.5  | 26 | S | WLPDAMVAPTVP           | S | 0.7   | 3.1   | Oxidation (M) |
| 128 | Q9HMB7 Q9HMB7   | 1 | 1423.662  | 3.4   | 123   | 134 | 2  | 74.1  | 27 | A | REEDDFSIFAPV           | L | -0.4  | 3.58  |               |
| 131 | Q9HQE2 Q9HQE2   | 1 | 1498.8104 | -11.5 | 114   | 127 | 7  | 36.3  | 28 | L | DRLRDAGLDVAVVT         | N | 0.2   | 4.18  |               |
| 135 | Q9HMY7 Q9HMY7   | 1 | 731.4582  | -6.0  | 104   | 110 | 4  | 24.0  | 21 | L | LAFVGII                | V | 3.0   | 6.02  |               |
| 136 | Q9HRL4 Q9HRL4   | 1 | 1369.6514 | 2.0   | 83    | 93  | 3  | 56.1  | 27 | T | LYRNFDDIDVT            | N | -0.5  | 3.6   |               |
| 137 | Q9HSW2 Q9HSW2   | 1 | 713.4799  | 27.2  | 22    | 27  | 4  | 25.1  | 13 | S | IRSLLI                 | I | 1.9   | 11.04 |               |
| 138 | Q9HP66 Q9HP66   | 1 | 830.5266  | 9.9   | 117   | 124 | 5  | 25.1  | 18 | V | FLGLLAVV               | L | 3.0   | 6.02  |               |
| 138 | Q9HP66 Q9HP66   | 1 | 986.6165  | 7.9   | 115   | 124 | 6  | 19.3  | 19 | T | GVFLGLLAVV             | L | 2.8   | 6.02  |               |
| 139 | Q9HPT9 Q9HPT9   | 1 | 2263.0128 | 2.7   | 61    | 82  | 6  | 56.9  | 25 | A | ALDLPGHGDSDDIETDPGPETL | D | -0.8  | 3.22  |               |
| 143 | Q9HMQ8 Q9HMQ8   | 1 | 731.4218  | 6.7   | 196   | 202 | 3  | 26.9  | 25 | A | IAAFLPT                | F | 1.8   | 6.02  |               |
| 145 | Q9HRA8 Q9HRA8   | 1 | 799.4803  | 8.0   | 319   | 326 | 4  | 31.5  | 26 | T | ALKAVGEI               | G | 1.0   | 6.94  |               |
| 148 | Q9HMH4 Q9HMH4   | 1 | 1344.5358 | 5.1   | 56    | 67  | 4  | 53.9  | 20 | A | SFSYDDPDADTL           | G | -0.9  | 2.74  |               |
| 150 | Q9HN79 Q9HN79   | 1 | 1037.6485 | -14.6 | 51    | 61  | 7  | 21.6  | 19 | A | VSAVGLVAPLI            | G | 2.3   | 6.02  |               |
| 155 | P33518 COX1     | 1 | 1447.6765 | 8.2   | 143   | 155 | 4  | 29.3  | 28 | I | DADDMAFPRINAI          | A | -0.1  | 3.6   |               |
| 157 | Q9HN37 Q9HN37   | 1 | 1314.8275 | -13.2 | 539   | 550 | 8  | 25.2  | 17 | A | LVFQVKLSVVIA           | A | 2.1   | 10.1  |               |
| 160 | Q07971 Q07971   | 1 | 1216.5611 | -20.9 | 258   | 267 | 3  | 25.7  | 24 | A | EQLEEAWAEI             | Q | -0.7  | 2.96  |               |
| 162 | Q9HS00 Q9HS00   | 1 | 799.4804  | 13.9  | 492   | 500 | 8  | 32.1  | 25 | T | AAVVAATVV              | R | 2.6   | 6.02  |               |
| 162 | Q9HS00 Q9HS00   | 1 | 1449.8919 | -24.6 | 192   | 205 | 7  | 25.0  | 21 | S | NVLTQLKPVLGVI          | G | 1.0   | 10.1  |               |
| 169 | Q9HN36 Q9HN36   | 1 | 731.4581  | -4.6  | 259   | 264 | 3  | 39.6  | 21 | T | FNLLLL                 | V | 2.4   | 6.02  |               |
| 173 | Q9HMB4 Q9HMB4   | 1 | 1621.8141 | 1.0   | 448   | 461 | 1  | 57.5  | 28 | A | EFIRDYVPFVPGPS         | A | 0.0   | 4.08  |               |

| hit | accession     | z | mass      | ppm   | start | end | mc | score | id | - | sequence             | + | gravy | pl    | modification             |
|-----|---------------|---|-----------|-------|-------|-----|----|-------|----|---|----------------------|---|-------|-------|--------------------------|
| 174 | Q9HS30 Q9HS30 | 1 | 1222.7173 | -1.5  | 59    | 70  | 6  | 24.5  | 21 | A | LLADLPVEAGIL         | V | 1.5   | 3     |                          |
| 178 | Q9HMU6 Q9HMU6 | 1 | 1231.6098 | -6.7  | 114   | 124 | 0  | 46.9  | 28 | V | GDSPPRWHPAL          | L | -1.1  | 7.84  |                          |
| 179 | O54610 O54610 | 1 | 745.4222  | 1.7   | 427   | 433 | 5  | 26.3  | 25 | T | EATLTLV              | G | 1.2   | 3.3   |                          |
| 187 | Q9HRJ8 Q9HRJ8 | 1 | 731.4582  | -6.0  | 396   | 402 | 4  | 22.6  | 21 | V | LLGAVFL              | Y | 2.8   | 6.02  |                          |
| 190 | Q9HMV1 Q9HMV1 | 1 | 763.3752  | -13.6 | 48    | 54  | 2  | 28.2  | 27 | A | TFLEPGT              | T | 0.0   | 3.3   |                          |
| 192 | Q9HHV2 Q9HHV2 | 1 | 930.5022  | -28.9 | 355   | 364 | 6  | 29.3  | 29 | A | AITLTLGDGA           | E | 1.0   | 3.1   |                          |
| 193 | Q9HMC9 Q9HMC9 | 1 | 1137.6758 | 0.7   | 533   | 543 | 6  | 27.1  | 22 | S | NNASVLLIPV           | A | 1.6   | 6.02  |                          |
| 204 | Q9HP76 Q9HP76 | 1 | 968.5807  | -8.2  | 119   | 126 | 3  | 25.9  | 23 | I | RWSIPIVV             | R | 1.2   | 11.04 |                          |
| 206 | Q9HPQ6 Q9HPQ6 | 1 | 997.4393  | 14.3  | 25    | 32  | 3  | 26.5  | 24 | A | LVDWYTDS             | H | -0.3  | 2.92  |                          |
| 211 | Q9HPY6 Q9HPY6 | 1 | 731.4694  | -20.0 | 390   | 395 | 3  | 34.3  | 21 | A | FARLLL               | A | 1.9   | 11.04 |                          |
| 213 | Q9HQB8 Q9HQB8 | 1 | 955.5273  | 10.8  | 61    | 70  | 4  | 25.5  | 25 | A | VPMRAAGAAI           | D | 1.1   | 11.04 |                          |
| 220 | Q9HMJ2 Q9HMJ2 | 1 | 876.4263  | 24.2  | 149   | 156 | 4  | 36.3  | 27 | A | EVSMADI              | D | 1.1   | 3     |                          |
| 228 | Q9HNJ2 Q9HNJ2 | 1 | 745.4222  | 0.3   | 116   | 122 | 5  | 31.9  | 26 | S | LVTETAL              | F | 1.2   | 3.3   |                          |
| 229 | Q9HMU9 Q9HMU9 | 1 | 1069.4393 | -3.3  | 37    | 45  | 1  | 35.1  | 20 | A | GYGYFFDTT            | T | -0.3  | 3.1   |                          |
| 232 | Q9HPQ1 Q9HPQ1 | 1 | 731.4582  | -4.6  | 376   | 382 | 3  | 29.2  | 21 | A | GLIGFLL              | F | 2.6   | 6.02  |                          |
| 233 | Q9HPQ5 Q9HPQ5 | 1 | 1041.4516 | -1.0  | 205   | 212 | 2  | 23.7  | 23 | A | NWYSTERS             | R | -2.0  | 6.88  |                          |
| 237 | Q9HM88 Q9HM88 | 1 | 1187.567  | -5.2  | 56    | 68  | 6  | 37.0  | 27 | A | SEIGTGAPSDALA        | A | 0.2   | 3     |                          |
| 239 | Q9HQU3 Q9HQU3 | 1 | 731.4582  | -6.0  | 143   | 149 | 3  | 36.3  | 21 | V | IIGLGFL              | A | 2.7   | 6.02  |                          |
| 255 | Q9HRJ0 Q9HRJ0 | 1 | 1122.5227 | -3.9  | 141   | 152 | 9  | 28.4  | 26 | A | MAAADTSVSALA         | L | 1.1   | 3.1   | Oxidation (M)            |
| 258 | O51975 O51975 | 1 | 713.4799  | 27.2  | 190   | 195 | 4  | 21.2  | 13 | L | RSLLI                | F | 1.9   | 11.04 |                          |
| 258 | O51975 O51975 | 1 | 1314.8169 | -5.2  | 184   | 194 | 6  | 21.6  | 17 | S | LCKTRLRSLLI          | I | 0.7   | 11.32 |                          |
| 260 | Q9HME2 Q9HME2 | 1 | 1988.0078 | 0.6   | 2     | 18  | 9  | 42.4  | 27 | M | VWIIDNLVTMVEHFTTA    | A | 0.9   | 4.06  |                          |
| 264 | Q9HQU8 Q9HQU8 | 1 | 2107.9698 | -0.5  | 13    | 30  | 4  | 41.1  | 26 | A | RLTDQDEFTPPESFVEQA   | N | -1.1  | 3.5   |                          |
| 265 | Q9HQE1 Q9HQE1 | 1 | 930.477   | -1.8  | 226   | 234 | 4  | 33.0  | 29 | T | ADLLSERGA            | N | -0.2  | 4.08  |                          |
| 273 | Q9HQ63 DHSD   | 1 | 1038.5386 | -1.6  | 121   | 130 | 5  | 27.0  | 25 | A | SVPTFLTGF            | - | 1.1   | 6.02  |                          |
| 277 | Q9HNE6 Q9HNE6 | 1 | 1203.607  | -4.0  | 275   | 284 | 3  | 29.4  | 29 | V | TWMDRVQGV            | - | 0.1   | 6.78  |                          |
| 278 | Q9HQ90 Q9HQ90 | 1 | 1066.5771 | 27.4  | 239   | 249 | 6  | 28.8  | 23 | A | QAALRAGADLV          | R | 0.6   | 6.78  | Gln->pyro-Glu (N-term Q) |
| 279 | Q9HMQ2 ASSY   | 1 | 1365.6564 | -2.7  | 146   | 156 | 3  | 44.5  | 27 | L | GLTREWEIEYA          | A | -0.7  | 3.96  |                          |
| 304 | Q9HMB0 Q9HMB0 | 1 | 896.4127  | -0.6  | 10    | 17  | 3  | 35.0  | 24 | L | LYTTPTDS             | D | -0.7  | 3.1   |                          |
| 307 | Q48325 TBPB   | 1 | 1409.7514 | 13.3  | 87    | 99  | 5  | 28.0  | 25 | I | RELIDVTSNPPI         | E | -0.2  | 4.08  |                          |
| 310 | Q9HRW7 Q9HRW7 | 1 | 1618.7012 | 8.1   | 2     | 15  | 5  | 47.8  | 25 | M | SDALDAFDHDAWRT       | A | -0.9  | 3.86  |                          |
| 319 | Q9HRR2 Q9HRR2 | 1 | 1688.8661 | -1.7  | 42    | 54  | 5  | 47.2  | 28 | V | DYLELLETLYYRV        | N | 0.0   | 3.82  |                          |
| 323 | Q9HSW6 CDC61  | 1 | 1098.6172 | -23.7 | 145   | 154 | 6  | 36.6  | 27 | I | LIVLDEVDI            | G | 1.6   | 2.88  |                          |
| 324 | Q9HML8 PSTB2  | 1 | 1516.6682 | -26.0 | 88    | 100 | 4  | 22.5  | 21 | S | VSDLDTTYGEERA        | L | -1.0  | 3.58  |                          |
| 328 | Q9HQH2 Q9HQH2 | 1 | 1441.6838 | -2.0  | 152   | 163 | 3  | 30.7  | 26 | V | NTRLQTFDGEYV         | M | -0.9  | 4.08  |                          |
| 331 | Q9HRJ7 Q9HRJ7 | 1 | 1901.0557 | -15.9 | 90    | 109 | 8  | 26.0  | 25 | L | LLGGVGGLYMLQAGLGARV  | A | 1.0   | 9.84  |                          |
| 344 | Q9HQV2 Q9HQV2 | 1 | 2003.9371 | -3.2  | 216   | 236 | 8  | 29.0  | 27 | T | GAVLLFRAGAMGNPASGDGD | - | 0.0   | 3.7   |                          |
| 354 | Q9HNB8 Q9HNB8 | 1 | 1293.6717 | -8.5  | 12    | 24  | 4  | 34.3  | 27 | A | SGHLAPLFDAAPV        | R | 0.7   | 4.94  |                          |
| 387 | Q9HSQ7 Q9HSQ7 | 1 | 944.512   | -11.1 | 208   | 214 | 2  | 32.3  | 29 | A | LFTYRFV              | N | 1.0   | 9.84  |                          |
| 401 | Q9HQ23 Q9HQ23 | 1 | 1222.7074 | 22.2  | 104   | 115 | 7  | 20.4  | 20 | V | NLAWVGPALALV         | G | 1.6   | 6.02  |                          |



| hit  | accession       | z | mass      | ppm   | start | end | mc | score | id | - | sequence         | + | gravy | pl    | modification |
|------|-----------------|---|-----------|-------|-------|-----|----|-------|----|---|------------------|---|-------|-------|--------------|
| 432  | Q9HRH6 Q9HRH6   | 1 | 1480.731  | 2.6   | 143   | 156 | 6  | 38.8  | 27 | A | SYTGLRWLAGGAET   | - | -0.2  | 6.88  |              |
| 433  | Q9HSE5 Q9HSE5   | 1 | 799.4804  | 20.8  | 81    | 89  | 8  | 27.2  | 25 | S | AAAAVVTVV        | L | 2.6   | 6.02  |              |
| 441  | Q9HS52 SYP      | 1 | 1698.861  | 27.7  | 449   | 465 | 8  | 29.3  | 27 | I | AAEIVMVLGEDSAARA | A | 0.6   | 3.82  |              |
| 458  | Q9HRK3 Q9HRK3   | 1 | 731.4582  | -6.0  | 47    | 52  | 3  | 24.0  | 21 | I | IQFVLI           | G | 2.7   | 6.02  |              |
| 471  | Q9HMMW6 Q9HMMW6 | 1 | 799.4804  | 20.8  | 2     | 10  | 7  | 26.1  | 25 | M | LAGAATVVV        | F | 2.3   | 6.02  |              |
| 472  | Q9HQV6 Q9HQV6   | 1 | 731.4582  | -4.6  | 26    | 32  | 3  | 36.8  | 21 | V | LFGGLL           | I | 2.5   | 6.02  |              |
| 482  | Q9HMK6 Q9HMK6   | 1 | 1727.9166 | -19.4 | 184   | 199 | 7  | 36.0  | 28 | T | EKDVSEARRDAVLGI  | T | -0.4  | 4.56  |              |
| 490  | Q9HR54 Q9HR54   | 1 | 958.5964  | 20.2  | 335   | 343 | 4  | 24.0  | 14 | V | LFRAAGLL         | V | 1.6   | 11.04 |              |
| 534  | Q9HPI6 Q9HPI6   | 1 | 882.5175  | 26.2  | 15    | 24  | 5  | 33.2  | 23 | T | LPAAIGGITA       | Y | 1.5   | 6.02  |              |
| 576  | Q9HRR3 Q9HRR3   | 1 | 1093.4716 | 7.5   | 42    | 49  | 1  | 31.5  | 26 | L | TYEYFERS         | R | -1.6  | 4.26  |              |
| 595  | Q9HRR7 Q9HRR7   | 1 | 1289.6364 | -27.7 | 41    | 55  | 6  | 32.6  | 27 | A | ADAGGPHLAPGVSA   | A | 0.3   | 4.94  |              |
| 596  | Q9HQB1 Q9HQB1   | 1 | 958.6328  | -17.7 | 70    | 77  | 4  | 19.6  | 14 | V | KAVFRLI          | E | 1.6   | 11.48 |              |
| 609  | Q9HRR6 Q9HRR6   | 1 | 1286.6295 | -1.0  | 95    | 104 | 1  | 30.2  | 28 | A | DFFEFEARKV       | E | -0.5  | 4.44  |              |
| 632  | Q9HRE8 RTCA     | 1 | 1227.6711 | -16.9 | 95    | 107 | 7  | 29.2  | 28 | T | SVEVGTAGSIPLV    | F | 1.1   | 3.3   |              |
| 650  | Q9HRP9 Q9HRP9   | 1 | 1255.6633 | -1.4  | 86    | 98  | 6  | 28.4  | 27 | V | GPDVAVTGAARRAS   | E | -0.2  | 10.88 |              |
| 652  | Q48295 ARCC     | 1 | 1170.6132 | -4.8  | 66    | 76  | 5  | 28.2  | 27 | A | ESAAEKPLDVL      | G | -0.1  | 3.82  |              |
| 654  | Q9HSE7 Q9HSE7   | 1 | 930.4771  | 6.3   | 36    | 44  | 4  | 29.8  | 29 | S | LDVAVRETGA       | T | -0.1  | 4.08  |              |
| 689  | Q9HRP5 Q9HRP5   | 1 | 745.4222  | 0.3   | 84    | 90  | 5  | 28.3  | 26 | V | TIETAVL          | Y | 1.3   | 3.3   |              |
| 694  | Q9HPV1 Q9HPV1   | 1 | 958.5964  | 20.2  | 33    | 41  | 5  | 14.3  | 14 | A | IAAFGLVRI        | S | 2.1   | 11.04 |              |
| 719  | O54633 O54633   | 1 | 1186.671  | -5.3  | 54    | 64  | 5  | 26.9  | 26 | A | ARIVEIAFAPT      | A | 1.0   | 6.98  |              |
| 748  | Q9HR26 Q9HR26   | 1 | 1449.8344 | 15.2  | 18    | 31  | 8  | 24.5  | 21 | T | VLSFGAYIGALRAL   | D | 1.5   | 9.84  |              |
| 768  | Q9HPH6 Q9HPH6   | 1 | 731.4429  | 14.9  | 112   | 118 | 6  | 24.0  | 21 | S | LSSVTIL          | S | 2.0   | 6.02  |              |
| 901  | Q9HHQ7 Q9HHQ7   | 1 | 731.4581  | -6.0  | 125   | 130 | 3  | 24.0  | 21 | I | LLNFIL           | H | 2.5   | 6.02  |              |
| 1001 | Q9HRF3 Q9HRF3   | 1 | 713.4799  | 27.2  | 85    | 90  | 4  | 15.6  | 13 | T | RLSLLL           | D | 1.7   | 11.04 |              |

END OF LIST VI

| hit                                                                                    | accession   | z | mass      | ppm   | start | end | mc | score | id | - | sequence      | + | gravy | pl    | modification             |
|----------------------------------------------------------------------------------------|-------------|---|-----------|-------|-------|-----|----|-------|----|---|---------------|---|-------|-------|--------------------------|
| <b>VII. Purple membrane; elastase digest; nLC-MALDI MS/MS; AVLI search specificity</b> |             |   |           |       |       |     |    |       |    |   |               |   |       |       |                          |
| 1                                                                                      | P02945 BACR | 1 | 731.4582  | -4.6  | 231   | 237 | 3  | 57.7  | 20 | V | GFGLILL       | R | 2.6   | 6.02  |                          |
| 1                                                                                      | P02945 BACR | 1 | 799.4916  | 6.8   | 187   | 193 | 3  | 38.5  | 23 | V | LRNVTVV       | L | 1.1   | 11.04 |                          |
| 1                                                                                      | P02945 BACR | 1 | 822.4024  | -10.6 | 95    | 100 | 1  | 26.9  | 24 | A | RYADWL        | F | -0.8  | 6.7   |                          |
| 1                                                                                      | P02945 BACR | 1 | 828.3918  | 23.3  | 92    | 97  | 1  | 30.7  | 23 | I | YWARYA        | D | -0.7  | 9.58  |                          |
| 1                                                                                      | P02945 BACR | 1 | 834.4276  | -5.5  | 194   | 200 | 2  | 30.7  | 24 | V | LWSAYPV       | V | 0.7   | 5.92  |                          |
| 1                                                                                      | P02945 BACR | 1 | 835.4514  | -12.2 | 220   | 226 | 3  | 28.5  | 23 | L | LFMVLDV       | S | 2.5   | 3.1   |                          |
| 1                                                                                      | P02945 BACR | 1 | 857.4395  | -4.1  | 18    | 24  | 0  | 32.2  | 26 | I | TGRPEWI       | W | -1.0  | 6.98  |                          |
| 1                                                                                      | P02945 BACR | 1 | 887.4786  | -25.8 | 124   | 132 | 4  | 60.2  | 27 | A | LVGADGIMI     | G | 1.8   | 3.1   |                          |
| 1                                                                                      | P02945 BACR | 1 | 917.4276  | 0.1   | 174   | 181 | 1  | 37.9  | 25 | A | ESMRPEVA      | S | -0.8  | 4.26  |                          |
| 1                                                                                      | P02945 BACR | 1 | 930.4811  | -6.2  | 201   | 209 | 3  | 68.7  | 27 | V | VWLGSEGA      | G | 0.9   | 3.3   |                          |
| 1                                                                                      | P02945 BACR | 1 | 958.6215  | -6.1  | 229   | 237 | 4  | 44.1  | 13 | A | KVGFGLILL     | R | 2.0   | 10.1  |                          |
| 1                                                                                      | P02945 BACR | 1 | 991.5015  | -7.5  | 98    | 105 | 1  | 29.0  | 25 | A | DWLFTTPL      | L | 0.4   | 3.1   |                          |
| 1                                                                                      | P02945 BACR | 1 | 1005.5356 | -1.8  | 238   | 246 | 2  | 37.5  | 24 | L | RSRAIFGEA     | E | -0.3  | 10.88 |                          |
| 1                                                                                      | P02945 BACR | 1 | 1016.5331 | 20.5  | 165   | 173 | 1  | 27.3  | 25 | V | LFFGFTSKA     | E | 0.9   | 10.1  |                          |
| 1                                                                                      | P02945 BACR | 1 | 1043.5499 | -2.0  | 112   | 121 | 4  | 72.5  | 27 | A | LLVDADQGTI    | L | 0.7   | 2.92  |                          |
| 1                                                                                      | P02945 BACR | 1 | 1062.6186 | -2.5  | 182   | 190 | 2  | 56.9  | 20 | A | STFKVLRNV     | T | 0.2   | 11.48 |                          |
| 1                                                                                      | P02945 BACR | 1 | 1081.5556 | 1.9   | 16    | 24  | 1  | 61.4  | 24 | A | QITGRPEWI     | W | -0.7  | 6.98  | Gln->pyro-Glu (N-term Q) |
| 1                                                                                      | P02945 BACR | 1 | 1098.5822 | 2.5   | 16    | 24  | 1  | 50.6  | 25 | A | QITGRPEWI     | W | -0.7  | 6.98  |                          |
| 1                                                                                      | P02945 BACR | 1 | 1116.6907 | 4.9   | 227   | 237 | 5  | 53.5  | 15 | V | SAKVGFLILL    | R | 1.7   | 10.1  |                          |
| 1                                                                                      | P02945 BACR | 1 | 1140.5451 | -2.4  | 48    | 57  | 1  | 23.9  | 23 | V | SDPDAKKFYA    | I | -1.2  | 6.8   |                          |
| 1                                                                                      | P02945 BACR | 1 | 1156.6029 | 6.2   | 18    | 26  | 1  | 56.0  | 25 | I | TGRPEWIWL     | A | -0.5  | 6.98  |                          |
| 1                                                                                      | P02945 BACR | 1 | 1156.634  | 0.3   | 112   | 122 | 5  | 106.5 | 25 | A | LLVDADQGTIL   | A | 0.9   | 2.92  |                          |
| 1                                                                                      | P02945 BACR | 1 | 1215.7115 | -8.0  | 101   | 111 | 5  | 62.7  | 23 | L | FTTPLLLDLA    | L | 1.6   | 3.1   |                          |
| 1                                                                                      | P02945 BACR | 1 | 1216.5612 | -20.1 | 242   | 253 | 2  | 22.5  | 22 | A | IFGEAEAPEPSA  | G | -0.2  | 3.02  |                          |
| 1                                                                                      | P02945 BACR | 1 | 1227.64   | 22.3  | 18    | 27  | 2  | 56.7  | 25 | I | TGRPEWIWLA    | L | -0.2  | 6.98  |                          |
| 1                                                                                      | P02945 BACR | 1 | 1227.6711 | -24.1 | 112   | 123 | 6  | 113.1 | 25 | A | LLVDADQGTILA  | L | 1.0   | 2.92  |                          |
| 1                                                                                      | P02945 BACR | 1 | 1242.5822 | -3.0  | 92    | 100 | 2  | 36.3  | 23 | I | YWARYADWL     | F | -0.6  | 6.64  |                          |
| 1                                                                                      | P02945 BACR | 1 | 1253.6292 | -0.8  | 48    | 58  | 2  | 66.4  | 25 | V | SDPDAKKFYAI   | T | -0.7  | 6.8   |                          |
| 1                                                                                      | P02945 BACR | 1 | 1314.8136 | -2.6  | 231   | 242 | 5  | 70.3  | 16 | V | GFGLILLRSRAI  | F | 1.2   | 12.4  |                          |
| 1                                                                                      | P02945 BACR | 1 | 1340.7241 | -0.5  | 18    | 28  | 3  | 28.5  | 25 | I | TGRPEWIWLA    | G | 0.1   | 6.98  |                          |
| 1                                                                                      | P02945 BACR | 1 | 1361.8031 | 1.8   | 182   | 193 | 4  | 76.5  | 20 | A | STFKVLRNVTVV  | L | 0.8   | 11.48 |                          |
| 1                                                                                      | P02945 BACR | 1 | 1380.719  | -3.1  | 16    | 26  | 2  | 71.8  | 25 | A | QITGRPEWIWL   | A | -0.3  | 6.98  | Gln->pyro-Glu (N-term Q) |
| 1                                                                                      | P02945 BACR | 1 | 1381.703  | 16.1  | 95    | 105 | 2  | 74.5  | 24 | A | RYADWLFTTPL   | L | -0.1  | 6.7   |                          |
| 1                                                                                      | P02945 BACR | 1 | 1409.7919 | -15.3 | 201   | 214 | 5  | 111.2 | 24 | V | VWLGSEGAGIVPL | N | 1.3   | 3.3   |                          |
| 1                                                                                      | P02945 BACR | 1 | 1451.7561 | 1.0   | 16    | 27  | 3  | 88.0  | 24 | A | QITGRPEWIWLA  | L | -0.1  | 6.98  | Gln->pyro-Glu (N-term Q) |
| 1                                                                                      | P02945 BACR | 1 | 1468.7827 | 11.0  | 16    | 27  | 3  | 61.8  | 25 | A | QITGRPEWIWLA  | L | -0.1  | 6.98  |                          |
| 1                                                                                      | P02945 BACR | 1 | 1607.8712 | 4.1   | 95    | 107 | 4  | 77.8  | 24 | A | RYADWLFTTPLLL | L | 0.5   | 6.7   |                          |

| hit | accession   | z | mass      | ppm   | start | end | mc | score | id | - | sequence            | + | gravy | pl    | modification             |
|-----|-------------|---|-----------|-------|-------|-----|----|-------|----|---|---------------------|---|-------|-------|--------------------------|
| 1   | P02945 BACR | 1 | 1629.9018 | 4.5   | 98    | 111 | 6  | 64.6  | 23 | A | DWLFTTPLLDDLA       | L | 1.2   | 2.92  |                          |
| 1   | P02945 BACR | 1 | 1671.923  | -12.1 | 126   | 143 | 7  | 91.6  | 25 | V | GADGIMIGTGLVGLTKV   | Y | 1.1   | 6.76  |                          |
| 1   | P02945 BACR | 1 | 1678.8025 | -3.5  | 76    | 91  | 1  | 123.4 | 25 | L | GYGLTMVFPFGGEQNPI   | Y | 0.0   | 3.3   |                          |
| 1   | P02945 BACR | 1 | 1686.8325 | -4.8  | 238   | 253 | 3  | 82.3  | 26 | L | RSRAIFGEAEAPEPSA    | G | -0.6  | 4.56  |                          |
| 1   | P02945 BACR | 1 | 1694.7974 | -7.2  | 76    | 91  | 1  | 115.0 | 24 | L | GYGLTMVFPFGGEQNPI   | Y | 0.0   | 3.3   | Oxidation (M)            |
| 1   | P02945 BACR | 1 | 1718.9832 | 0.8   | 231   | 246 | 6  | 57.5  | 21 | V | GFGLLLRSRAIFGEA     | E | 0.9   | 10.88 |                          |
| 1   | P02945 BACR | 1 | 1720.9552 | -1.7  | 95    | 108 | 5  | 101.0 | 22 | A | RYADWLFTTPLL        | D | 0.7   | 6.7   |                          |
| 1   | P02945 BACR | 1 | 1754.9104 | -2.2  | 13    | 27  | 4  | 33.0  | 25 | V | SQAQITGRPEWIWLA     | L | -0.3  | 6.98  |                          |
| 1   | P02945 BACR | 1 | 1801.8828 | 1.1   | 92    | 105 | 3  | 76.1  | 25 | I | YWARYADWLFTTPL      | L | -0.1  | 6.64  |                          |
| 1   | P02945 BACR | 1 | 1835.9669 | -4.5  | 48    | 64  | 4  | 95.0  | 25 | V | SDPDAKKFYAITTLVPA   | I | 0.0   | 6.8   |                          |
| 1   | P02945 BACR | 1 | 1884.0754 | 0.5   | 124   | 143 | 9  | 110.6 | 21 | A | LVGADGIMIGTGLVGLTKV | Y | 1.4   | 6.76  |                          |
| 1   | P02945 BACR | 1 | 2020.1033 | -2.5  | 95    | 111 | 7  | 127.6 | 24 | A | RYADWLFTTPLLDDLA    | L | 0.7   | 3.88  |                          |
| 1   | P02945 BACR | 1 | 2440.2831 | -0.2  | 92    | 111 | 8  | 75.3  | 25 | I | YWARYADWLFTTPLLDDLA | L | 0.6   | 3.88  |                          |
| 2   | P00772 ELA1 | 1 | 701.3609  | -4.8  | 62    | 66  | 0  | 27.2  | 27 | I | RQNWV               | M | -1.6  | 11.04 |                          |
| 2   | P00772 ELA1 | 1 | 800.3851  | 9.2   | 54    | 61  | 1  | 46.1  | 23 | A | HTCGGTLI            | R | 0.7   | 7.16  |                          |
| 2   | P00772 ELA1 | 1 | 882.5287  | 0.6   | 138   | 146 | 2  | 30.3  | 21 | L | GVLPRAGTI           | L | 0.7   | 11.04 |                          |
| 2   | P00772 ELA1 | 1 | 943.4512  | -7.2  | 223   | 231 | 2  | 49.9  | 23 | V | NGQYAVHGV           | T | -0.2  | 7.76  |                          |
| 2   | P00772 ELA1 | 1 | 1004.4862 | -2.5  | 62    | 69  | 1  | 45.1  | 25 | I | RQNWVMTA            | A | -0.7  | 11.04 |                          |
| 2   | P00772 ELA1 | 1 | 1040.4675 | 2.4   | 45    | 53  | 0  | 25.3  | 22 | L | QYRSGSSWA           | H | -1.2  | 9.84  |                          |
| 2   | P00772 ELA1 | 1 | 1066.6499 | 0.0   | 138   | 148 | 4  | 54.4  | 19 | L | QLVPRAGTILA         | N | 1.1   | 11.04 |                          |
| 2   | P00772 ELA1 | 1 | 1097.5254 | 3.6   | 34    | 42  | 0  | 71.2  | 24 | A | QRNSWPSQI           | S | -1.6  | 11.04 | Gln->pyro-Glu (N-term Q) |
| 2   | P00772 ELA1 | 1 | 1114.5519 | 10.2  | 34    | 42  | 0  | 55.5  | 25 | A | QRNSWPSQI           | S | -1.6  | 11.04 |                          |
| 2   | P00772 ELA1 | 1 | 1123.6713 | -5.1  | 136   | 146 | 3  | 39.4  | 20 | V | QLGVLPRAGTI         | L | 0.6   | 11.04 |                          |
| 2   | P00772 ELA1 | 1 | 1240.5836 | -0.2  | 43    | 53  | 1  | 63.8  | 23 | I | SLQYRSGSSWA         | H | -0.7  | 9.84  |                          |
| 2   | P00772 ELA1 | 1 | 1244.5462 | 6.2   | 105   | 114 | 1  | 72.6  | 22 | V | VHPYWNTDDV          | A | -1.0  | 3.88  |                          |
| 2   | P00772 ELA1 | 1 | 1307.7925 | -5.4  | 136   | 148 | 5  | 22.4  | 19 | V | QLGVLPRAGTILA       | N | 1.0   | 11.04 |                          |
| 2   | P00772 ELA1 | 1 | 1315.5833 | 10.9  | 105   | 115 | 2  | 62.6  | 23 | V | VHPYWNTDDVA         | A | -0.7  | 3.88  |                          |
| 2   | P00772 ELA1 | 1 | 1343.6146 | -2.2  | 104   | 114 | 2  | 75.6  | 23 | I | VVHPYWNTDDV         | A | -0.5  | 3.88  |                          |
| 2   | P00772 ELA1 | 1 | 1386.6204 | 4.4   | 105   | 116 | 3  | 96.9  | 22 | V | VHPYWNTDDVAA        | G | -0.5  | 3.88  |                          |
| 2   | P00772 ELA1 | 1 | 1414.6517 | 1.6   | 104   | 115 | 3  | 81.2  | 24 | I | VVHPYWNTDDVA        | A | -0.3  | 3.88  |                          |
| 2   | P00772 ELA1 | 1 | 1485.6889 | -1.8  | 104   | 116 | 4  | 89.6  | 23 | I | VVHPYWNTDDVAA       | G | -0.2  | 3.88  |                          |
| 2   | P00772 ELA1 | 1 | 1529.7223 | -0.3  | 29    | 42  | 1  | 71.0  | 25 | V | GGTEAQRNSWPSQI      | S | -1.3  | 6.98  |                          |
| 2   | P00772 ELA1 | 1 | 1590.8729 | -1.2  | 124   | 137 | 5  | 31.5  | 24 | L | RLAQSVTLNSYVQL      | G | 0.2   | 9.84  |                          |
| 2   | P00772 ELA1 | 1 | 1712.8522 | -17.2 | 101   | 114 | 3  | 92.1  | 25 | V | QKIVVHPYWNTDDV      | A | -0.6  | 5.1   |                          |
| 2   | P00772 ELA1 | 1 | 1715.8955 | 0.2   | 156   | 171 | 3  | 67.9  | 26 | I | TGWGLTRTNGQLAQTL    | Q | -0.4  | 11.04 |                          |
| 2   | P00772 ELA1 | 1 | 1770.9992 | 0.3   | 132   | 148 | 6  | 37.3  | 22 | L | NSYVQLGVLPRAGTILA   | N | 0.7   | 9.84  |                          |
| 2   | P00772 ELA1 | 1 | 1801.0098 | -0.6  | 130   | 146 | 5  | 127.3 | 22 | V | TLNSYVQLGVLPRAGTI   | L | 0.5   | 9.84  |                          |
| 2   | P00772 ELA1 | 1 | 1815.8024 | -2.5  | 83    | 98  | 2  | 130.9 | 22 | V | VGEHNLNQNDGTEQYV    | G | -1.4  | 3.82  |                          |
| 2   | P00772 ELA1 | 1 | 1905.8533 | -0.6  | 105   | 121 | 5  | 119.4 | 23 | V | VHPYWNTDDVAAGYDIA   | L | -0.3  | 3.6   |                          |
| 2   | P00772 ELA1 | 1 | 1914.8708 | 1.0   | 82    | 98  | 3  | 132.9 | 23 | V | VVGEHNLNQNDGTEQYV   | G | -1.0  | 3.82  |                          |

| hit | accession       | z | mass      | ppm   | start | end | mc | score | id | - | sequence                       | + | gravy | pl    | modification  |
|-----|-----------------|---|-----------|-------|-------|-----|----|-------|----|---|--------------------------------|---|-------|-------|---------------|
| 2   | P00772 ELA1     | 1 | 1933.8847 | 9.8   | 104   | 120 | 5  | 65.5  | 25 | I | VVHPYWNTDDVAAGYDI              | A | -0.2  | 3.6   |               |
| 2   | P00772 ELA1     | 1 | 1971.8923 | 2.7   | 83    | 100 | 3  | 147.5 | 23 | V | VEHNLNQNDGTEQYVGV              | Q | -1.0  | 3.82  |               |
| 2   | P00772 ELA1     | 1 | 1985.131  | -3.7  | 130   | 148 | 7  | 109.7 | 21 | V | TLNSYVQLGVLPRAGTILA            | N | 0.8   | 9.84  |               |
| 2   | P00772 ELA1     | 1 | 2004.9218 | -0.4  | 104   | 121 | 6  | 144.5 | 24 | I | VVHPYWNTDDVAAGYDIA             | L | -0.1  | 3.6   |               |
| 2   | P00772 ELA1     | 1 | 2043.0498 | 3.2   | 156   | 174 | 4  | 103.5 | 26 | I | TGWGLTRTNGQLAQLTQQA            | Y | -0.6  | 11.04 |               |
| 2   | P00772 ELA1     | 1 | 2070.9607 | -2.5  | 82    | 100 | 4  | 154.5 | 24 | V | VVEHNLNQNDGTEQYVGV             | Q | -0.7  | 3.82  |               |
| 2   | P00772 ELA1     | 1 | 2118.0058 | 2.6   | 104   | 122 | 7  | 34.4  | 26 | I | VVHPYWNTDDVAAGYDIAL            | L | 0.2   | 3.6   |               |
| 2   | P00772 ELA1     | 1 | 2231.0899 | -4.3  | 104   | 123 | 8  | 137.8 | 26 | I | VVHPYWNTDDVAAGYDIAL            | R | 0.3   | 3.6   |               |
| 2   | P00772 ELA1     | 1 | 2341.1299 | -5.7  | 83    | 103 | 4  | 96.7  | 25 | V | VEHNLNQNDGTEQYVGVQKI           | V | -1.0  | 4.42  |               |
| 2   | P00772 ELA1     | 1 | 2374.1594 | -0.3  | 101   | 121 | 7  | 130.5 | 26 | V | QKIVVHPYWNTDDVAAGYDIA          | L | -0.2  | 4.16  |               |
| 2   | P00772 ELA1     | 1 | 2440.1983 | 4.2   | 82    | 103 | 5  | 110.4 | 26 | V | VVEHNLNQNDGTEQYVGVQKI          | V | -0.8  | 4.42  |               |
| 3   | Q9HR99 Q9HR99   | 1 | 1419.6154 | -3.6  | 122   | 134 | 2  | 65.3  | 21 | V | DAGETLEHTFETA                  | G | -0.7  | 3.68  |               |
| 3   | Q9HR99 Q9HR99   | 1 | 1473.6195 | -5.4  | 106   | 119 | 0  | 75.8  | 18 | A | SGFGTMDKDGNGQFA                | V | -0.8  | 3.88  |               |
| 3   | Q9HR99 Q9HR99   | 1 | 1491.7246 | -7.0  | 57    | 70  | 1  | 84.6  | 26 | A | VAPDGGFKFEPSEL                 | T | -0.3  | 3.82  |               |
| 3   | Q9HR99 Q9HR99   | 1 | 1562.7617 | -5.1  | 56    | 70  | 2  | 78.5  | 25 | I | AVAPDGGFKFEPSEL                | T | -0.1  | 3.82  |               |
| 3   | Q9HR99 Q9HR99   | 1 | 1671.7563 | -1.6  | 106   | 121 | 2  | 133.1 | 23 | A | SGFGTMDKDGNGQFAVV              | D | -0.2  | 3.88  |               |
| 3   | Q9HR99 Q9HR99   | 1 | 1687.7512 | -4.7  | 106   | 121 | 2  | 54.8  | 21 | A | SGFGTMDKDGNGQFAVV              | D | -0.2  | 3.88  | Oxidation (M) |
| 3   | Q9HR99 Q9HR99   | 1 | 1691.8407 | 0.9   | 57    | 72  | 2  | 105.2 | 26 | A | VAPDGGFKFEPSELTV               | S | 0.0   | 3.82  |               |
| 3   | Q9HR99 Q9HR99   | 1 | 1762.8778 | -3.5  | 56    | 72  | 3  | 119.1 | 26 | I | AVAPDGGFKFEPSELTV              | S | 0.1   | 3.82  |               |
| 3   | Q9HR99 Q9HR99   | 1 | 2131.9222 | 7.6   | 122   | 140 | 3  | 152.5 | 22 | V | DAGETLEHTFETAGEYTYV            | C | -0.7  | 3.58  |               |
| 3   | Q9HR99 Q9HR99   | 1 | 2212.0107 | 4.0   | 100   | 121 | 3  | 56.4  | 25 | I | SIPDGASGFGTMDKDGNGQFAVV        | D | -0.1  | 3.6   |               |
| 3   | Q9HR99 Q9HR99   | 1 | 2307.1019 | 5.5   | 48    | 70  | 3  | 104.2 | 25 | A | SQSGGNTIAVAPDGGFKFEPSEL        | T | -0.3  | 3.82  |               |
| 3   | Q9HR99 Q9HR99   | 1 | 2507.218  | 5.4   | 48    | 72  | 4  | 128.2 | 26 | A | SQSGGNTIAVAPDGGFKFEPSELTV      | S | -0.2  | 3.82  |               |
| 3   | Q9HR99 Q9HR99   | 1 | 3073.3611 | 0.4   | 106   | 134 | 5  | 91.2  | 21 | A | SGFGTMDKDGNGQFAVVDAGETLEHTFETA | G | -0.4  | 3.74  |               |
| 4   | Q9HMMW9 Q9HMMW9 | 1 | 978.5287  | 8.2   | 636   | 643 | 1  | 55.1  | 23 | A | FHLQPPQL                       | F | -0.4  | 7.84  |               |
| 4   | Q9HMMW9 Q9HMMW9 | 1 | 1166.6084 | -23.3 | 616   | 624 | 2  | 48.3  | 24 | A | YVINREQFV                      | S | -0.1  | 6.88  |               |
| 4   | Q9HMMW9 Q9HMMW9 | 1 | 1367.618  | -8.8  | 133   | 143 | 0  | 37.8  | 21 | L | QYQSPTWKEMA                    | N | -1.5  | 6.86  |               |
| 4   | Q9HMMW9 Q9HMMW9 | 1 | 1368.686  | -1.2  | 614   | 624 | 3  | 41.0  | 25 | A | MAYVINREQFV                    | S | 0.3   | 6.88  |               |
| 4   | Q9HMMW9 Q9HMMW9 | 1 | 1467.7358 | -1.0  | 616   | 627 | 3  | 38.3  | 25 | A | YVINREQFVSDV                   | F | -0.1  | 4.08  |               |
| 4   | Q9HMMW9 Q9HMMW9 | 1 | 1567.7307 | -7.4  | 120   | 132 | 1  | 33.7  | 23 | A | GYGPDNKYELNWL                  | Q | -1.2  | 4.08  |               |
| 4   | Q9HMMW9 Q9HMMW9 | 1 | 1695.7926 | -3.9  | 133   | 146 | 1  | 89.6  | 23 | L | QYQSPTWKEMANTI                 | R | -1.1  | 6.86  |               |
| 4   | Q9HMMW9 Q9HMMW9 | 1 | 1736.8958 | 0.9   | 619   | 633 | 2  | 89.0  | 25 | I | NREQFVSDVFKGRGV                | G | -0.7  | 10.08 |               |
| 4   | Q9HMMW9 Q9HMMW9 | 1 | 1857.9335 | -0.5  | 595   | 610 | 1  | 105.2 | 26 | I | DTYYVGFNMTKVPKPV               | R | -0.3  | 9.46  |               |
| 4   | Q9HMMW9 Q9HMMW9 | 1 | 1864.9544 | 0.1   | 619   | 635 | 3  | 92.1  | 26 | I | NREQFVSDVFKGRGVGA              | F | -0.5  | 10.08 |               |
| 4   | Q9HMMW9 Q9HMMW9 | 1 | 2112.1116 | 2.3   | 616   | 633 | 4  | 95.5  | 25 | A | YVINREQFVSDVFKGRGV             | G | -0.2  | 9.72  |               |
| 4   | Q9HMMW9 Q9HMMW9 | 1 | 2159.0973 | 0.5   | 592   | 610 | 2  | 39.7  | 26 | V | STIDTYYVGFNMTKVPKPV            | R | -0.1  | 9.46  |               |
| 4   | Q9HMMW9 Q9HMMW9 | 1 | 2240.1702 | -3.3  | 616   | 635 | 5  | 56.5  | 26 | A | YVINREQFVSDVFKGRGVGA           | F | -0.1  | 9.72  |               |
| 4   | Q9HMMW9 Q9HMMW9 | 1 | 2314.1892 | -0.5  | 614   | 633 | 5  | 97.4  | 25 | A | MAYVINREQFVSDVFKGRGV           | G | 0.0   | 9.72  |               |
| 4   | Q9HMMW9 Q9HMMW9 | 1 | 2442.2478 | 1.7   | 614   | 635 | 6  | 52.0  | 26 | A | MAYVINREQFVSDVFKGRGVGA         | F | 0.1   | 9.72  |               |
| 5   | Q48302 Q48302   | 1 | 904.5059  | -11.4 | 82    | 89  | 2  | 33.8  | 24 | V | VFVPTPF                        | - | 1.8   | 6.02  |               |

| hit | accession     | z | mass      | ppm   | start | end | mc | score | id | - | sequence                          | + | gravy | pl   | modification             |
|-----|---------------|---|-----------|-------|-------|-----|----|-------|----|---|-----------------------------------|---|-------|------|--------------------------|
| 5   | Q48302 Q48302 | 1 | 979.4723  | -5.6  | 40    | 49  | 2  | 47.4  | 24 | A | GYAERGIGSA                        | A | -0.3  | 6.88 |                          |
| 5   | Q48302 Q48302 | 1 | 1050.5094 | 1.8   | 39    | 49  | 3  | 50.1  | 24 | A | AGYAERGIGSA                       | A | -0.1  | 6.88 |                          |
| 5   | Q48302 Q48302 | 1 | 1149.5778 | -2.2  | 40    | 51  | 4  | 63.8  | 25 | A | GYAERGIGSAAV                      | G | 0.2   | 6.88 |                          |
| 5   | Q48302 Q48302 | 1 | 1220.6149 | -4.8  | 39    | 51  | 5  | 54.4  | 25 | A | AGYAERGIGSAAV                     | G | 0.4   | 6.88 |                          |
| 5   | Q48302 Q48302 | 1 | 1234.6306 | -2.8  | 37    | 49  | 5  | 68.2  | 25 | A | LAAGYAERGIGSA                     | A | 0.3   | 6.88 |                          |
| 5   | Q48302 Q48302 | 1 | 1277.6364 | -0.9  | 40    | 53  | 5  | 103.4 | 26 | A | GYAERGIGSAAVGA                    | I | 0.3   | 6.88 |                          |
| 5   | Q48302 Q48302 | 1 | 1305.6677 | 2.4   | 36    | 49  | 6  | 72.1  | 25 | A | ALAAGYAERGIGSA                    | A | 0.4   | 6.88 |                          |
| 5   | Q48302 Q48302 | 1 | 1348.6735 | -0.3  | 39    | 53  | 6  | 95.6  | 26 | A | AGYAERGIGSAAVGA                   | I | 0.4   | 6.88 |                          |
| 5   | Q48302 Q48302 | 1 | 1359.6922 | -0.2  | 54    | 66  | 4  | 29.3  | 26 | A | IAEDPDLFGTGLI                     | L | 0.6   | 2.88 |                          |
| 5   | Q48302 Q48302 | 1 | 1386.6813 | -1.9  | 14    | 27  | 3  | 47.5  | 25 | A | ETGSNMPAIPKAA                     | A | -0.4  | 6.94 |                          |
| 5   | Q48302 Q48302 | 1 | 1457.7184 | -10.2 | 13    | 27  | 4  | 101.0 | 25 | L | AETGSNMPAIPKAA                    | A | -0.2  | 6.94 |                          |
| 5   | Q48302 Q48302 | 1 | 1473.7133 | -1.8  | 13    | 27  | 4  | 38.4  | 26 | L | AETGSNMPAIPKAA                    | A | -0.2  | 6.94 | Oxidation (M)            |
| 5   | Q48302 Q48302 | 1 | 1475.7732 | -4.6  | 36    | 51  | 8  | 49.2  | 26 | A | ALAAGYAERGIGSAAV                  | G | 0.8   | 6.88 |                          |
| 5   | Q48302 Q48302 | 1 | 1603.8318 | 0.6   | 36    | 53  | 9  | 83.8  | 25 | A | ALAAGYAERGIGSAAVGA                | I | 0.7   | 6.88 |                          |
| 6   | Q9HMI3 Q9HMI3 | 1 | 1172.619  | -5.7  | 556   | 566 | 3  | 53.9  | 26 | V | GGPFLDRVELA                       | - | 0.2   | 4.08 |                          |
| 6   | Q9HMI3 Q9HMI3 | 1 | 1475.7157 | -0.9  | 390   | 402 | 0  | 61.1  | 26 | A | TFSNPRGYNPNI                      | Q | -1.2  | 9.84 |                          |
| 6   | Q9HMI3 Q9HMI3 | 1 | 1577.8202 | -2.9  | 178   | 190 | 2  | 59.0  | 25 | I | DLTQQYAPFLRNL                     | A | -0.5  | 6.7  |                          |
| 6   | Q9HMI3 Q9HMI3 | 1 | 1648.8573 | -5.1  | 178   | 191 | 3  | 50.7  | 25 | I | DLTQQYAPFLRNLA                    | I | -0.3  | 6.7  |                          |
| 6   | Q9HMI3 Q9HMI3 | 1 | 1696.8056 | -0.3  | 331   | 345 | 4  | 30.1  | 25 | I | NRDEIVDSIYQGFAA                   | S | -0.3  | 3.7  |                          |
| 6   | Q9HMI3 Q9HMI3 | 1 | 1951.8912 | 1.1   | 220   | 236 | 1  | 140.2 | 24 | V | GTGPFDFDQLDNETQRV                 | R | -1.1  | 3.58 |                          |
| 6   | Q9HMI3 Q9HMI3 | 1 | 1994.9585 | -4.4  | 460   | 477 | 4  | 89.1  | 25 | V | LLHPGTDIDDPADQNYI                 | A | -0.4  | 3.42 |                          |
| 6   | Q9HMI3 Q9HMI3 | 1 | 2310.1339 | 1.6   | 198   | 219 | 6  | 64.2  | 26 | I | LSRDQIESLGADAQPELGTDPV            | G | -0.5  | 3.42 |                          |
| 6   | Q9HMI3 Q9HMI3 | 1 | 2494.2551 | 2.2   | 196   | 219 | 8  | 98.1  | 25 | A | AILSRDQIESLGADAQPELGTDPV          | G | -0.2  | 3.42 |                          |
| 6   | Q9HMI3 Q9HMI3 | 1 | 2565.2922 | 2.0   | 195   | 219 | 9  | 44.2  | 25 | A | AAILSRDQIESLGADAQPELGTDPV         | G | -0.1  | 3.42 |                          |
| 6   | Q9HMI3 Q9HMI3 | 1 | 3202.4691 | 5.2   | 207   | 236 | 5  | 72.6  | 23 | L | GADAQPELGTDPVGTGPFDFDQLDNETQRV    | R | -0.9  | 3.28 |                          |
| 7   | Q9HN93 Q9HN93 | 1 | 1332.6099 | -2.1  | 98    | 108 | 1  | 38.4  | 24 | V | SFEWVSNTHNI                       | L | -0.5  | 5.12 |                          |
| 7   | Q9HN93 Q9HN93 | 1 | 1564.7481 | -6.4  | 103   | 117 | 4  | 51.3  | 25 | V | SNTHNILIDAQPDGA                   | D | -0.5  | 3.88 |                          |
| 7   | Q9HN93 Q9HN93 | 1 | 1610.7002 | 1.7   | 38    | 53  | 3  | 96.9  | 21 | A | QAYDGFSGDAKGGAV                   | G | -0.4  | 3.88 | Gln->pyro-Glu (N-term Q) |
| 7   | Q9HN93 Q9HN93 | 1 | 1761.737  | 6.6   | 240   | 254 | 1  | 54.0  | 20 | A | FEPDTELGHDEYDPV                   | G | -1.3  | 3.38 |                          |
| 7   | Q9HN93 Q9HN93 | 1 | 2213.0389 | 4.4   | 98    | 117 | 5  | 147.7 | 25 | V | SFEWVSNTHNILIDAQPDGA              | D | -0.3  | 3.7  |                          |
| 7   | Q9HN93 Q9HN93 | 1 | 2418.0401 | 5.8   | 38    | 61  | 4  | 176.6 | 21 | A | QAYDGFSGDAKGGAVGNVDGTTV           | D | -0.5  | 3.6  | Gln->pyro-Glu (N-term Q) |
| 7   | Q9HN93 Q9HN93 | 1 | 2583.1726 | 4.9   | 62    | 87  | 5  | 52.4  | 24 | V | DRTGTDEVTIDVGVANGGTYGFGPA         | A | -0.4  | 3.36 |                          |
| 7   | Q9HN93 Q9HN93 | 1 | 3291.4229 | 0.9   | 38    | 69  | 5  | 83.0  | 20 | A | QAYDGFSGDAKGGAVGNVDGTTVDRTGTDEV   | T | -0.8  | 3.64 | Gln->pyro-Glu (N-term Q) |
| 7   | Q9HN93 Q9HN93 | 1 | 3444.5018 | -2.8  | 206   | 237 | 2  | 41.2  | 19 | V | SYRRTAPDSSGAFDYEPGGDTDDQPAIPEA    | D | -1.2  | 3.58 |                          |
| 7   | Q9HN93 Q9HN93 | 1 | 3505.5547 | 15.3  | 38    | 71  | 6  | 63.8  | 22 | A | QAYDGFSGDAKGGAVGNVDGTTVDRTGTDEVTI | D | -0.6  | 3.64 | Gln->pyro-Glu (N-term Q) |
| 9   | Q9HMG3 Q9HMG3 | 1 | 1037.5254 | 8.9   | 35    | 43  | 3  | 48.2  | 23 | I | AQDVLEHRA                         | S | -0.7  | 5.22 |                          |
| 9   | Q9HMG3 Q9HMG3 | 1 | 2207.0131 | 1.1   | 44    | 65  | 1  | 85.0  | 24 | A | STVPETDFPEPYNRSIGGGGGA            | G | -0.7  | 3.82 |                          |
| 9   | Q9HMG3 Q9HMG3 | 1 | 2335.0717 | -1.4  | 44    | 67  | 2  | 107.0 | 24 | A | STVPETDFPEPYNRSIGGGGAGAGA         | V | -0.6  | 3.82 |                          |
| 9   | Q9HMG3 Q9HMG3 | 1 | 2434.1401 | 4.2   | 44    | 68  | 3  | 63.2  | 25 | A | STVPETDFPEPYNRSIGGGGAGAV          | A | -0.4  | 3.82 |                          |
| 9   | Q9HMG3 Q9HMG3 | 1 | 2505.1772 | 3.0   | 44    | 69  | 4  | 107.0 | 25 | A | STVPETDFPEPYNRSIGGGGAGAVA         | G | -0.3  | 3.82 |                          |

| hit | accession       | z | mass      | ppm   | start | end | mc | score | id | - | sequence                      | + | gravy | pl    | modification  |
|-----|-----------------|---|-----------|-------|-------|-----|----|-------|----|---|-------------------------------|---|-------|-------|---------------|
| 9   | Q9HMG3 Q9HMG3   | 1 | 2690.2573 | 1.8   | 44    | 72  | 5  | 60.5  | 25 | A | STVPETDFPEPYNRSIGGGGGAGAVAGGA | E | -0.3  | 3.82  |               |
| 10  | Q9HN95 Q9HN95   | 1 | 940.5018  | 5.1   | 454   | 463 | 1  | 65.8  | 23 | V | LAPGSPGFPV                    | - | 0.6   | 6.02  |               |
| 10  | Q9HN95 Q9HN95   | 1 | 1403.6874 | -2.0  | 29    | 40  | 2  | 42.0  | 26 | L | YTFYPPQLAHPA                  | F | -0.4  | 7.7   |               |
| 10  | Q9HN95 Q9HN95   | 1 | 1450.8224 | -0.3  | 140   | 151 | 4  | 44.5  | 22 | A | YLAWYTILPKLA                  | G | 0.8   | 9.52  |               |
| 10  | Q9HN95 Q9HN95   | 1 | 1516.7714 | -4.5  | 28    | 40  | 3  | 87.6  | 26 | V | LYTFYPPQLAHPA                 | F | -0.1  | 7.7   |               |
| 10  | Q9HN95 Q9HN95   | 1 | 1729.8828 | -3.6  | 26    | 40  | 4  | 58.0  | 26 | A | NVLYTFYPPQLAHPA               | F | 0.0   | 7.7   |               |
| 10  | Q9HN95 Q9HN95   | 1 | 2062.9901 | 1.4   | 176   | 193 | 2  | 62.7  | 25 | V | GFHHQYTDPGIAEGFKFI            | A | -0.4  | 6.02  |               |
| 11  | Q9HRQ9 Q9HRQ9   | 1 | 1398.6681 | -6.8  | 102   | 113 | 1  | 57.9  | 23 | V | KWVWEGSTGHN                   | H | -0.8  | 7.82  |               |
| 11  | Q9HRQ9 Q9HRQ9   | 1 | 1626.8002 | -1.5  | 79    | 93  | 3  | 90.2  | 25 | V | KVGPNNQNVFDPAEV               | Y | -0.8  | 4.08  |               |
| 11  | Q9HRQ9 Q9HRQ9   | 1 | 2306.0716 | -13.4 | 102   | 122 | 3  | 96.1  | 23 | V | KWVWEGSTGHNHATSVPDEA          | G | -0.7  | 5.18  |               |
| 11  | Q9HRQ9 Q9HRQ9   | 1 | 2445.1812 | 8.3   | 79    | 101 | 5  | 87.2  | 26 | V | KVGPNNQNVFDPAEVYVSPGDTV       | K | -0.5  | 3.7   |               |
| 12  | Q9HSS1 Q9HSS1   | 1 | 940.4866  | -2.6  | 249   | 258 | 4  | 35.7  | 23 | A | LAGALEDGPV                    | S | 0.6   | 3     |               |
| 12  | Q9HSS1 Q9HSS1   | 1 | 1207.635  | -3.4  | 153   | 164 | 3  | 75.4  | 24 | V | GFVGFGEIARGV                  | A | 0.9   | 6.98  |               |
| 12  | Q9HSS1 Q9HSS1   | 1 | 1232.6401 | -6.0  | 210   | 220 | 1  | 42.6  | 25 | V | FAPLTEETRGL                   | V | -0.2  | 4.26  |               |
| 12  | Q9HSS1 Q9HSS1   | 1 | 1593.8151 | -0.8  | 149   | 164 | 5  | 57.8  | 25 | A | DATVGFVGFGEIARGV              | A | 0.8   | 4.08  |               |
| 12  | Q9HSS1 Q9HSS1   | 1 | 1646.8152 | -2.7  | 210   | 224 | 3  | 37.1  | 26 | V | FAPLTEETRGLVDEA               | A | -0.2  | 3.68  |               |
| 13  | Q9HMF1 Q9HMF1   | 1 | 1198.5982 | -7.7  | 160   | 169 | 1  | 71.4  | 24 | V | RLEGELPEWA                    | T | -0.9  | 3.96  |               |
| 13  | Q9HMF1 Q9HMF1   | 1 | 1411.7095 | -0.6  | 158   | 169 | 2  | 70.8  | 24 | V | NVRLLEGELPEWA                 | T | -0.7  | 3.96  |               |
| 13  | Q9HMF1 Q9HMF1   | 1 | 2193.0073 | 1.6   | 581   | 599 | 5  | 52.7  | 24 | L | NIDEETYARIEQGDDVEVV           | D | -0.8  | 3.32  |               |
| 14  | Q9HRS0 Q9HRS0   | 1 | 1286.6156 | -0.9  | 119   | 129 | 1  | 52.0  | 25 | V | RFVWESGGHN                    | H | -0.5  | 7.84  |               |
| 14  | Q9HRS0 Q9HRS0   | 1 | 1475.6067 | -1.2  | 219   | 230 | 0  | 64.6  | 17 | A | YFFMKYGGDYGE                  | - | -0.7  | 4.08  |               |
| 14  | Q9HRS0 Q9HRS0   | 1 | 1917.8956 | -1.5  | 183   | 200 | 1  | 84.7  | 24 | V | TDSPPENKGYQTIVPDSA            | K | -1.1  | 3.7   |               |
| 15  | Q9HM89 EF1A     | 1 | 1440.7937 | -6.2  | 235   | 249 | 3  | 34.7  | 24 | I | SGIGTVPVGRIETGV               | M | 0.5   | 6.98  |               |
| 15  | Q9HM89 EF1A     | 1 | 1521.71   | -5.7  | 165   | 178 | 2  | 50.6  | 24 | V | KDLFGQVGFNPDDA                | K | -0.6  | 3.6   |               |
| 15  | Q9HM89 EF1A     | 1 | 1764.8319 | 2.8   | 162   | 178 | 3  | 87.0  | 25 | V | SGVKDLFGQVGFNPDDA             | K | -0.3  | 3.6   |               |
| 16  | Q9HS26 Q9HS26   | 1 | 731.4251  | 2.1   | 61    | 67  | 4  | 22.9  | 22 | A | GMLVALI                       | F | 2.8   | 6.02  | Oxidation (M) |
| 16  | Q9HS26 Q9HS26   | 1 | 1711.7577 | 2.6   | 16    | 31  | 2  | 55.7  | 23 | A | GDDSEPEIDFYGGKLA              | S | -0.8  | 3.42  |               |
| 16  | Q9HS26 Q9HS26   | 1 | 2144.1517 | 0.0   | 310   | 328 | 7  | 33.6  | 24 | A | SDSLWIARELSVLPFVEAI           | N | 0.8   | 3.82  |               |
| 17  | Q9HMMW4 Q9HMMW4 | 1 | 1745.8161 | 0.0   | 273   | 285 | 2  | 26.7  | 25 | A | FERAEDYYLRQWA                 | K | -1.3  | 4.44  |               |
| 17  | Q9HMMW4 Q9HMMW4 | 1 | 2202.097  | -6.2  | 252   | 270 | 3  | 37.0  | 26 | A | AFNGNLGPWDLKRWSSQSV           | M | -0.8  | 10.08 |               |
| 17  | Q9HMMW4 Q9HMMW4 | 1 | 2393.0692 | -0.8  | 231   | 251 | 5  | 72.2  | 23 | A | KPYVEAEDADGLEQDEEVMRA         | A | -1.1  | 3.62  |               |
| 17  | Q9HMMW4 Q9HMMW4 | 1 | 2577.1904 | -5.4  | 229   | 251 | 7  | 35.5  | 24 | A | LAKPYVEAEDADGLEQDEEVMRA       | A | -0.8  | 3.62  |               |
| 18  | Q9HRR1 Q9HRR1   | 1 | 1544.7583 | -5.9  | 177   | 189 | 0  | 30.5  | 26 | A | TWRSQNTDNTIPI                 | L | -1.1  | 6.78  |               |
| 18  | Q9HRR1 Q9HRR1   | 1 | 2719.1198 | 13.6  | 151   | 174 | 3  | 124.0 | 19 | V | NIDEFDDYDTWENDYGDAGIGKPA      | K | -1.3  | 3.16  |               |
| 19  | Q9HHR4 Q9HHR4   | 1 | 1340.818  | -0.9  | 235   | 247 | 6  | 24.3  | 18 | A | LIGVGYIIGPRIA                 | A | 1.5   | 9.84  |               |
| 20  | Q9HRL3 Q9HRL3   | 1 | 1845.9221 | -3.5  | 631   | 648 | 6  | 28.9  | 26 | A | RGADTFDQGVIDGIVNAV            | S | 0.2   | 3.6   |               |
| 20  | Q9HRL3 Q9HRL3   | 1 | 1916.9592 | -2.6  | 630   | 648 | 7  | 58.8  | 26 | L | ARGADTFDQGVIDGIVNAV           | S | 0.3   | 3.6   |               |
| 20  | Q9HRL3 Q9HRL3   | 1 | 2133.0702 | 3.5   | 631   | 651 | 7  | 28.6  | 26 | A | RGADTFDQGVIDGIVNAVSSI         | S | 0.3   | 3.6   |               |
| 21  | Q9HM69 CSG      | 1 | 1186.6081 | -20.2 | 716   | 726 | 4  | 28.4  | 26 | V | ELLQGDASIEI                   | N | 0.3   | 2.94  |               |
| 21  | Q9HM69 CSG      | 1 | 1308.7877 | 4.2   | 840   | 852 | 9  | 54.4  | 18 | V | AVLGAALLALRQN                 | - | 1.1   | 11.04 |               |

| hit | accession     | z | mass      | ppm   | start | end | mc | score | id | - | sequence                | + | gravy | pl    | modification  |
|-----|---------------|---|-----------|-------|-------|-----|----|-------|----|---|-------------------------|---|-------|-------|---------------|
| 21  | Q9HM69 CSG    | 1 | 2542.0831 | 12.0  | 591   | 613 | 4  | 73.9  | 21 | I | SVDSDDTFDEEDIDISELRQGSA | S | -1.0  | 3.12  |               |
| 22  | Q9HM85 EF2    | 1 | 1379.8024 | -3.0  | 614   | 625 | 6  | 38.8  | 21 | A | LIDADIRLLEPI            | Q | 0.8   | 3.7   |               |
| 22  | Q9HM85 EF2    | 1 | 1786.8407 | 18.2  | 155   | 169 | 2  | 67.9  | 26 | I | SELQEGPEEMQERLL         | S | -1.2  | 3.68  |               |
| 23  | Q9HP48 Q9HP48 | 1 | 1821.7694 | 6.5   | 204   | 220 | 4  | 74.7  | 21 | V | FESGVDHFEVDDDGALA       | A | -0.3  | 3.32  |               |
| 23  | Q9HP48 Q9HP48 | 1 | 1892.8065 | 2.0   | 204   | 221 | 5  | 53.6  | 20 | V | FESGVDHFEVDDDGALAA      | A | -0.1  | 3.32  |               |
| 24  | Q9HMX1 Q9HMX1 | 1 | 887.548   | 8.0   | 315   | 323 | 6  | 19.1  | 19 | A | GFIAALLAL               | V | 2.6   | 6.02  |               |
| 24  | Q9HMX1 Q9HMX1 | 1 | 1760.8329 | -1.8  | 111   | 126 | 1  | 53.3  | 25 | L | SRDVIPNQGYNDPSTV        | R | -1.0  | 3.88  |               |
| 24  | Q9HMX1 Q9HMX1 | 1 | 2330.0146 | 0.6   | 497   | 519 | 5  | 43.6  | 20 | A | NALGDGIRDAIDPESEGGSEEEA | A | -1.0  | 3.28  |               |
| 26  | Q9HMT7 Q9HMT7 | 1 | 1702.7322 | -0.9  | 44    | 59  | 3  | 127.6 | 21 | V | DVDTEAYEESHAPGAI        | G | -0.7  | 3.5   |               |
| 27  | Q9HS12 Q9HS12 | 1 | 731.4694  | -15.4 | 23    | 28  | 3  | 32.0  | 20 | V | FRALLL                  | A | 1.9   | 11.04 |               |
| 27  | Q9HS12 Q9HS12 | 1 | 1293.6717 | -8.0  | 137   | 147 | 2  | 24.5  | 24 | V | TAYDQRLPFLA             | R | -0.1  | 6.7   |               |
| 28  | Q9HRL1 Q9HRL1 | 1 | 1517.7878 | -0.8  | 335   | 347 | 4  | 52.8  | 25 | I | NSALSIFYYSRVV           | K | 0.6   | 9.58  |               |
| 28  | Q9HRL1 Q9HRL1 | 1 | 2070.984  | -2.2  | 131   | 149 | 1  | 52.4  | 25 | A | SVPFHFWAPEAYEGAPAPV     | S | 0.1   | 4.24  |               |
| 29  | Q9HSM4 DHE42  | 1 | 1255.6925 | -3.7  | 241   | 251 | 5  | 57.3  | 25 | A | LLLDDWGARVV             | A | 0.8   | 3.88  |               |
| 33  | Q9HPA9 Q9HPA9 | 1 | 930.4771  | -2.6  | 509   | 518 | 2  | 31.6  | 27 | A | QGNVGLSSGI              | T | 0.3   | 6.02  |               |
| 34  | Q9HSA8 Q9HSA8 | 1 | 953.4971  | 9.1   | 61    | 68  | 1  | 37.6  | 23 | V | FGEYRGLL                | E | 0.0   | 6.88  |               |
| 34  | Q9HSA8 Q9HSA8 | 1 | 1349.6979 | -2.0  | 61    | 72  | 2  | 27.3  | 25 | V | FGEYRGLLEPGI            | N | -0.1  | 4.26  |               |
| 36  | Q9HRJ5 Q9HRJ5 | 1 | 1243.6561 | -15.1 | 96    | 106 | 3  | 36.8  | 26 | A | TTPLSRAEWLA             | A | -0.1  | 6.98  |               |
| 37  | Q9HNY2 Q9HNY2 | 1 | 1126.6234 | -16.4 | 230   | 241 | 5  | 29.2  | 24 | A | LITVPGADASAL            | R | 1.2   | 3.1   |               |
| 38  | Q9HP84 HTR4   | 1 | 830.5266  | 9.9   | 327   | 334 | 5  | 17.1  | 17 | L | GFILVALV                | G | 3.1   | 6.02  |               |
| 39  | Q9HP76 Q9HP76 | 1 | 968.5807  | -8.2  | 119   | 126 | 2  | 25.9  | 22 | I | RWSIPIVV                | R | 1.2   | 11.04 |               |
| 39  | Q9HP76 Q9HP76 | 1 | 1277.6616 | -20.6 | 467   | 481 | 8  | 32.3  | 26 | V | TAAISGAFTAAVGA          | A | 1.4   | 6.02  |               |
| 40  | Q9HR98 Q9HR98 | 1 | 2059.9698 | 5.3   | 134   | 153 | 7  | 70.0  | 26 | V | SFVDATDPDAVADAIRPETA    | F | -0.1  | 3.36  |               |
| 43  | Q9HRS4 Q9HRS4 | 1 | 2054.809  | 6.7   | 16    | 35  | 4  | 81.0  | 15 | A | AADQGIDPWTADDHEGGDGE    | - | -1.3  | 3.22  |               |
| 44  | Q9HS72 SECE   | 1 | 1605.8436 | -1.7  | 1     | 14  | 4  | 33.3  | 25 | - | MDVPLELSAYTRVL          | R | 0.5   | 4.08  |               |
| 45  | Q9HPG8 Q9HPG8 | 1 | 1317.6241 | 0.8   | 661   | 670 | 1  | 67.9  | 25 | V | EFDDYFLRTL              | E | -0.4  | 3.7   |               |
| 46  | Q9HHN1 Q9HHN1 | 1 | 2336.1934 | 1.3   | 166   | 188 | 7  | 49.8  | 26 | A | GAILSGVYMGDKQSPLSDTTLLA | S | 0.3   | 3.88  |               |
| 47  | Q9HN92 Q9HN92 | 1 | 955.5273  | -2.9  | 1     | 8   | 2  | 42.7  | 24 | - | MNVRPQVI                | A | 0.2   | 11.04 |               |
| 47  | Q9HN92 Q9HN92 | 1 | 971.5222  | -5.1  | 1     | 8   | 2  | 30.3  | 27 | - | MNVRPQVI                | A | 0.2   | 11.04 | Oxidation (M) |
| 47  | Q9HN92 Q9HN92 | 1 | 1026.5644 | 0.6   | 1     | 9   | 3  | 55.2  | 24 | - | MNVRPQVIA               | T | 0.4   | 11.04 |               |
| 48  | Q9HSM2 MUTS1  | 1 | 1156.6088 | 1.1   | 328   | 338 | 4  | 29.4  | 25 | A | RDALGDVLGEI             | Y | 0.2   | 3.7   |               |
| 50  | Q9HQ64 Q9HQ64 | 1 | 1716.8907 | -1.9  | 79    | 94  | 5  | 71.3  | 25 | V | YNALVNQGIENAKRA         | A | -0.6  | 9.72  |               |
| 51  | Q9HR22 Q9HR22 | 1 | 1658.8304 | 2.2   | 72    | 86  | 4  | 36.5  | 26 | V | YSELFGLAIGHPEQV         | L | 0.2   | 4.24  |               |
| 52  | Q9HPQ2 Q9HPQ2 | 1 | 1402.6517 | -0.1  | 332   | 343 | 2  | 71.1  | 24 | A | YVVDNYGYSRPA            | T | -0.7  | 6.58  |               |
| 53  | Q9HN43 CAPPA  | 1 | 930.4771  | -1.8  | 326   | 334 | 4  | 31.5  | 27 | L | AVIDRTADA               | Y | 0.2   | 3.88  |               |
| 53  | Q9HN43 CAPPA  | 1 | 1267.6561 | 11.5  | 308   | 319 | 2  | 45.9  | 24 | L | RDADLGAPFPPI            | D | -0.2  | 3.88  |               |
| 54  | P25964 BACS1  | 1 | 1426.6187 | -1.9  | 219   | 231 | 0  | 29.5  | 20 | V | FMHSESPPAPEQA           | T | -0.9  | 4.24  |               |
| 55  | Q9HMK1 Q9HMK1 | 1 | 762.4276  | -28.7 | 116   | 123 | 4  | 32.9  | 25 | A | AIALFGTA                | I | 1.9   | 6.02  |               |
| 57  | Q9HSB5 Q9HSB5 | 1 | 1955.051  | -18.3 | 22    | 41  | 9  | 33.7  | 26 | V | QGAIDAGATIGPRVMVSLLA    | V | 0.9   | 6.78  | Oxidation (M) |
| 59  | Q9HHI2 Q9HHI2 | 1 | 731.4582  | -6.0  | 40    | 46  | 4  | 24.0  | 20 | L | IVFGAIL                 | L | 3.0   | 6.02  |               |

| hit | accession     | z | mass      | ppm   | start | end | mc | score | id | - | sequence               | + | gravy | pI    | modification             |
|-----|---------------|---|-----------|-------|-------|-----|----|-------|----|---|------------------------|---|-------|-------|--------------------------|
| 59  | Q9HHI2 Q9HHI2 | 1 | 731.4582  | -4.6  | 41    | 47  | 4  | 24.1  | 20 | I | VFGAILL                | M | 2.9   | 6.02  |                          |
| 61  | Q9HMZ3 Q9HMZ3 | 1 | 2517.1237 | 3.8   | 413   | 432 | 3  | 53.9  | 23 | V | EYLWYVGDYPSYDERNQHIA   | R | -1.2  | 4.06  |                          |
| 66  | P16102 BACH   | 1 | 1220.6401 | -1.6  | 191   | 201 | 3  | 33.8  | 25 | A | GTAEIFDTRLV            | L | 0.3   | 4.08  |                          |
| 67  | Q9HRL9 Q9HRL9 | 1 | 1556.841  | -0.2  | 548   | 562 | 7  | 68.5  | 25 | V | ATLGSLDVLILGEVDR       | - | 0.6   | 3.7   |                          |
| 69  | Q9HQP2 Q9HQP2 | 1 | 2104.9491 | 0.6   | 746   | 763 | 2  | 27.0  | 23 | V | VFYDGPRLDSQGDYFQQA     | Y | -0.9  | 3.6   |                          |
| 71  | Q9HNR0 Q9HNR0 | 1 | 745.4044  | 25.6  | 464   | 470 | 3  | 24.9  | 23 | A | MSPLAVL                | S | 1.9   | 6.02  | Oxidation (M)            |
| 76  | Q9HN02 Q9HN02 | 1 | 1096.5917 | -0.8  | 163   | 171 | 3  | 52.0  | 23 | V | LFDYLTRAV              | N | 0.7   | 6.7   |                          |
| 80  | Q9HPM1 Q9HPM1 | 1 | 1026.5458 | 18.7  | 164   | 174 | 5  | 30.5  | 24 | I | ADGTRPAVAVA            | T | 0.4   | 6.78  |                          |
| 83  | Q9HMB7 Q9HMB7 | 1 | 1423.662  | 3.4   | 123   | 134 | 1  | 74.1  | 24 | A | REEDDFSIFAPV           | L | -0.4  | 3.58  |                          |
| 84  | Q9HMY7 Q9HMY7 | 1 | 731.4582  | -6.0  | 104   | 110 | 4  | 24.0  | 20 | L | LAFVGII                | V | 3.0   | 6.02  |                          |
| 86  | Q9HN37 Q9HN37 | 1 | 1314.8275 | -13.2 | 539   | 550 | 7  | 25.2  | 16 | A | LVFQVKLSVIA            | A | 2.1   | 10.1  |                          |
| 87  | Q9HND8 VATI   | 1 | 1530.7678 | -4.5  | 364   | 376 | 2  | 44.1  | 26 | I | NRPQYTEIDPTVV          | L | -0.9  | 4.08  |                          |
| 88  | Q9HPT9 Q9HPT9 | 1 | 2263.0128 | 2.7   | 61    | 82  | 3  | 56.9  | 23 | A | ALDLPGHGDSDDIETDPGPETL | D | -0.8  | 3.22  |                          |
| 89  | Q9HRN3 Q9HRN3 | 1 | 1649.8009 | -0.5  | 84    | 100 | 4  | 26.4  | 25 | V | SSPGGAVSGSEVQYRAV      | K | -0.2  | 6.88  |                          |
| 90  | Q9HQB8 Q9HQB8 | 1 | 955.5273  | 10.8  | 61    | 70  | 4  | 25.5  | 24 | A | VPMRAAGAAI             | D | 1.1   | 11.04 |                          |
| 91  | Q9HHV1 Q9HHV1 | 1 | 1972.0425 | 14.0  | 132   | 149 | 8  | 26.0  | 24 | L | RAMTALAFRHAATDRVVA     | E | 0.3   | 12.1  | Oxidation (M)            |
| 92  | Q9HN47 PRIL   | 1 | 1397.5228 | 4.0   | 315   | 327 | 2  | 14.7  | 13 | A | YGNCVNPDDLCDCA         | I | -0.5  | 2.82  |                          |
| 95  | Q9HN22 Q9HN22 | 1 | 1719.8104 | 2.4   | 149   | 165 | 6  | 48.7  | 25 | A | AAFLADIDHSAYGTTPA      | Q | 0.3   | 3.88  |                          |
| 96  | Q9HRL8 Q9HRL8 | 1 | 1015.5603 | 2.3   | 170   | 178 | 2  | 32.2  | 25 | A | GVRIPAWFA              | F | 0.9   | 11.04 |                          |
| 98  | Q9HP01 Q9HP01 | 1 | 1009.6172 | 3.3   | 21    | 31  | 5  | 19.5  | 19 | A | ALLAPSGLLV             | A | 1.8   | 6.02  |                          |
| 98  | Q9HP01 Q9HP01 | 1 | 1123.6825 | -12.5 | 13    | 23  | 5  | 22.2  | 20 | V | GSPRARLAALL            | A | 0.5   | 12.4  |                          |
| 103 | Q9HME2 Q9HME2 | 1 | 1988.0078 | 0.6   | 2     | 18  | 6  | 42.4  | 26 | M | VWIIDNLVTMVEHFTTA      | A | 0.9   | 4.06  |                          |
| 106 | Q9HQ90 Q9HQ90 | 1 | 1066.5771 | 27.4  | 239   | 249 | 6  | 28.8  | 21 | A | QAALRAGADLV            | R | 0.6   | 6.78  | Gln->pyro-Glu (N-term Q) |
| 108 | Q9HSA0 Q9HSA0 | 1 | 1260.6251 | -2.2  | 39    | 50  | 1  | 52.5  | 26 | A | FEHGLPSGPHLA           | D | -0.2  | 6.02  |                          |
| 110 | Q9HQ63 DHSD   | 1 | 1038.5386 | -1.6  | 121   | 130 | 2  | 27.0  | 22 | A | SVPTFLTGAFF            | - | 1.1   | 6.02  |                          |
| 113 | Q9HSW2 Q9HSW2 | 1 | 713.4799  | 27.2  | 23    | 28  | 3  | 21.2  | 13 | I | RSLLI                  | S | 1.9   | 11.04 |                          |
| 114 | Q9HRJ8 Q9HRJ8 | 1 | 731.4582  | -6.0  | 396   | 402 | 4  | 22.6  | 20 | V | LLGAVFL                | Y | 2.8   | 6.02  |                          |
| 115 | Q9HRT4 Q9HRT4 | 1 | 1449.8555 | 0.6   | 208   | 224 | 9  | 19.1  | 19 | V | GVPTAIGGAGVALAVVV      | L | 1.9   | 6.02  |                          |
| 119 | Q9HNP7 Q9HNP7 | 1 | 1784.9632 | 19.9  | 270   | 288 | 8  | 43.2  | 23 | V | RLGTVSGEEVGLVGASALA    | D | 0.7   | 4.26  |                          |
| 125 | Q9HP66 Q9HP66 | 1 | 830.5266  | 9.9   | 117   | 124 | 5  | 25.1  | 17 | V | FLGLLAVV               | L | 3.0   | 6.02  |                          |
| 127 | Q9HPQ1 Q9HPQ1 | 1 | 731.4582  | -4.6  | 376   | 382 | 3  | 29.2  | 20 | A | GLIGFLL                | F | 2.6   | 6.02  |                          |
| 130 | Q9HQH2 Q9HQH2 | 1 | 1441.6838 | -2.0  | 152   | 163 | 1  | 30.7  | 24 | V | NTRLQTFDGEYV           | M | -0.9  | 4.08  |                          |
| 132 | Q9HQU3 Q9HQU3 | 1 | 731.4582  | -6.0  | 143   | 149 | 3  | 36.3  | 20 | V | IIGLGFL                | A | 2.7   | 6.02  |                          |
| 135 | Q9HM88 Q9HM88 | 1 | 1187.567  | -5.2  | 56    | 68  | 3  | 37.0  | 25 | A | SEIGTGAPSDALA          | A | 0.2   | 3     |                          |
| 137 | Q9HQ19 Q9HQ19 | 1 | 1208.7016 | 5.7   | 23    | 34  | 5  | 20.3  | 19 | V | LLVSATIGPEPI           | T | 1.2   | 3.3   |                          |
| 142 | Q9HP88 Q9HP88 | 1 | 1689.9301 | -2.5  | 397   | 412 | 4  | 55.1  | 24 | I | LLPIAPGLDDTPEIRA       | Q | 0.2   | 3.7   |                          |
| 149 | Q9HMH4 Q9HMH4 | 1 | 1344.5358 | 5.1   | 56    | 67  | 1  | 53.9  | 16 | A | SFSYDDPDADTL           | G | -0.9  | 2.74  |                          |
| 151 | Q9HRJ0 Q9HRJ0 | 1 | 1122.5227 | -3.9  | 141   | 152 | 6  | 28.4  | 23 | A | MAAADTSVSALA           | L | 1.1   | 3.1   | Oxidation (M)            |
| 156 | Q9HMQ2 ASSY   | 1 | 1365.6564 | -2.7  | 146   | 156 | 2  | 44.5  | 25 | L | GLTREWEIEYA            | A | -0.7  | 3.96  |                          |
| 161 | Q9HNE6 Q9HNE6 | 1 | 1203.607  | -4.0  | 275   | 284 | 2  | 29.4  | 26 | V | TWMDRVQGVV             | - | 0.1   | 6.78  |                          |



| hit | accession       | z | mass      | ppm   | start | end | mc | score | id | - | sequence             | + | gravy | pl    | modification    |
|-----|-----------------|---|-----------|-------|-------|-----|----|-------|----|---|----------------------|---|-------|-------|-----------------|
| 166 | Q9HHV2 Q9HHV2   | 1 | 930.5022  | -28.9 | 355   | 364 | 4  | 29.3  | 27 | A | AITLTLGDGA           | E | 1.0   | 3.1   |                 |
| 170 | Q9HPN9 Q9HPN9   | 1 | 1468.7998 | -9.8  | 273   | 286 | 6  | 26.4  | 25 | A | TPELSRVAADRLA        | A | 0.0   | 7.04  |                 |
| 174 | Q9HPQ3 Q9HPQ3   | 1 | 731.4429  | 14.9  | 247   | 253 | 3  | 23.0  | 20 | A | VTSSILL              | V | 2.0   | 6.02  |                 |
| 178 | Q9HSW6 CDC61    | 1 | 1098.6172 | -23.7 | 145   | 154 | 6  | 36.6  | 24 | I | LIVLDEVDAI           | G | 1.6   | 2.88  |                 |
| 182 | Q48325 TBPB     | 1 | 1409.7514 | 13.3  | 87    | 99  | 3  | 28.0  | 24 | I | RELGIDVTSNPPI        | E | -0.2  | 4.08  |                 |
| 187 | Q07971 Q07971   | 1 | 1216.5611 | -20.9 | 258   | 267 | 3  | 25.7  | 21 | A | EQLEEAWEI            | Q | -0.7  | 2.96  |                 |
| 188 | P33518 COX1     | 1 | 1447.6765 | 8.2   | 143   | 155 | 4  | 29.3  | 25 | I | DADDMAFPRIAI         | A | -0.1  | 3.6   |                 |
| 189 | Q9HS30 Q9HS30   | 1 | 1222.7173 | -1.5  | 59    | 70  | 6  | 24.5  | 19 | A | LLADLPVEAGIL         | V | 1.5   | 3     |                 |
| 190 | Q9HR04 Q9HR04   | 1 | 789.4232  | -22.5 | 16    | 24  | 3  | 30.0  | 25 | A | TGAATLSGL            | A | 0.9   | 6.02  |                 |
| 192 | Q9HRR2 Q9HRR2   | 1 | 1688.8661 | -1.7  | 42    | 54  | 4  | 47.2  | 26 | V | DYLELLETLYYRV        | N | 0.0   | 3.82  |                 |
| 193 | Q9HJM2 Q9HJM2   | 1 | 876.4263  | 24.2  | 149   | 156 | 3  | 36.3  | 25 | A | EVSMLADI             | D | 1.1   | 3     |                 |
| 195 | Q9HMU6 Q9HMU6   | 1 | 1231.6098 | -6.7  | 114   | 124 | 0  | 46.9  | 26 | V | GDSPPRWAPL           | L | -1.1  | 7.84  |                 |
| 198 | O54559 O54559   | 1 | 1159.6714 | -15.3 | 107   | 118 | 4  | 25.2  | 23 | L | VGGVFGVIGTRV         | G | 1.4   | 11.04 |                 |
| 208 | Q9HNB8 Q9HNB8   | 1 | 1293.6717 | -8.5  | 12    | 24  | 3  | 34.3  | 24 | A | SGHLAPLFDAAPV        | R | 0.7   | 4.94  |                 |
| 212 | Q9HRJ7 Q9HRJ7   | 1 | 1901.0557 | -15.9 | 90    | 109 | 8  | 26.0  | 25 | L | LLGGVGGLYMLQGAGLGARV | A | 1.0   | 9.84  |                 |
| 232 | Q9HSQ7 Q9HSQ7   | 1 | 944.512   | -11.1 | 208   | 214 | 1  | 32.3  | 26 | A | LFTYRFV              | N | 1.0   | 9.84  |                 |
| 236 | Q9HR54 Q9HR54   | 1 | 958.5964  | 20.2  | 335   | 343 | 4  | 24.0  | 13 | V | LFRAGGLLL            | V | 1.6   | 11.04 |                 |
| 241 | Q9HN79 Q9HN79   | 1 | 1037.6485 | -14.6 | 51    | 61  | 6  | 21.6  | 18 | A | VSAVGLVAPLI          | G | 2.3   | 6.02  |                 |
| 246 | Q9HQU8 Q9HQU8   | 1 | 2107.9698 | -0.5  | 13    | 30  | 2  | 41.1  | 24 | A | RLTDQDEFTPPESFVEQA   | N | -1.1  | 3.5   |                 |
| 254 | Q9HSE1 Q9HSE1   | 1 | 1227.6459 | 4.5   | 11    | 24  | 6  | 25.2  | 25 | L | GGGIAGLTAQELA        | E | 0.7   | 3.3   |                 |
| 260 | Q9HRP5 Q9HRP5   | 1 | 745.4222  | 0.3   | 84    | 90  | 3  | 28.3  | 23 | V | TIETAVL              | Y | 1.3   | 3.3   |                 |
| 271 | Q9HRH6 Q9HRH6   | 1 | 1480.731  | 2.6   | 143   | 156 | 4  | 38.8  | 25 | A | SYTGLRWLAGGAET       | - | -0.2  | 6.88  |                 |
| 273 | Q9HR62 Q9HR62   | 1 | 958.5964  | 20.2  | 21    | 29  | 5  | 14.1  | 13 | A | FRVGLAVVV            | L | 2.3   | 11.04 |                 |
| 282 | Q9HRK3 Q9HRK3   | 1 | 731.4582  | -6.0  | 47    | 52  | 3  | 24.0  | 20 | I | IQFVLI               | G | 2.7   | 6.02  |                 |
| 286 | O54662 O54662   | 1 | 1167.5515 | 28.6  | 78    | 88  | 4  | 24.0  | 23 | I | MTVAMTIGIEA          | G | 1.4   | 3.3   | 2 Oxidation (M) |
| 289 | O54610 O54610   | 1 | 1439.7094 | -0.3  | 193   | 203 | 1  | 27.0  | 25 | A | FLTPRMPWMYV          | H | 0.4   | 9.84  |                 |
| 294 | Q9HMMW6 Q9HMMW6 | 1 | 799.4804  | 20.8  | 2     | 10  | 6  | 26.1  | 23 | M | LAGAATVVV            | F | 2.3   | 6.02  |                 |
| 296 | Q9HQV6 Q9HQV6   | 1 | 731.4582  | -4.6  | 26    | 32  | 3  | 36.8  | 20 | V | LFGLLL               | I | 2.5   | 6.02  |                 |
| 303 | Q9HNNW7 Q9HNNW7 | 1 | 917.5334  | -4.3  | 345   | 352 | 5  | 22.8  | 21 | A | LLADLRAF             | - | 1.2   | 6.78  |                 |
| 309 | Q9HPF1 Q9HPF1   | 1 | 1453.7525 | 27.7  | 7     | 22  | 7  | 25.3  | 24 | V | GDTGPLDAALAARAGV     | T | 0.4   | 3.88  |                 |
| 332 | Q9HPY6 Q9HPY6   | 1 | 731.4694  | -20.0 | 390   | 395 | 3  | 34.3  | 20 | A | FARLLL               | A | 1.9   | 11.04 |                 |
| 375 | Q9HQY5 Q9HQY5   | 1 | 745.4222  | -3.6  | 142   | 148 | 3  | 23.1  | 23 | L | LVTTAEL              | N | 1.2   | 3.3   |                 |
| 382 | Q9HRS8 Q9HRS8   | 1 | 731.4582  | -6.0  | 94    | 100 | 5  | 21.2  | 20 | A | AFALIVV              | G | 3.3   | 6.02  |                 |
| 385 | Q9HQZ0 Q9HQZ0   | 1 | 1137.6645 | 9.1   | 513   | 522 | 5  | 20.8  | 20 | A | ILELDVNPLL           | A | 1.2   | 3     |                 |
| 388 | Q9HRR7 Q9HRR7   | 1 | 1289.6364 | -27.7 | 41    | 55  | 5  | 32.6  | 25 | A | ADAGGPHLAPGVSA       | A | 0.3   | 4.94  |                 |
| 397 | Q9HHW5 Q9HHW5   | 1 | 731.4582  | -6.0  | 88    | 94  | 3  | 22.4  | 20 | L | FIGLGIL              | I | 2.7   | 6.02  |                 |
| 405 | Q9HRR6 Q9HRR6   | 1 | 1286.6295 | -1.0  | 95    | 104 | 1  | 30.2  | 26 | A | DFFEFEARKV           | E | -0.5  | 4.44  |                 |
| 420 | Q9HRC9 Q9HRC9   | 1 | 1805.0564 | 9.8   | 74    | 91  | 7  | 16.3  | 16 | L | ILRVGKTGVAFGFGVLA    | A | 1.3   | 11.48 |                 |
| 421 | Q9HQ23 Q9HQ23   | 1 | 1222.7074 | 22.2  | 104   | 115 | 7  | 20.4  | 18 | V | NLAWWGPALALV         | G | 1.6   | 6.02  |                 |
| 433 | Q48295 ARCC     | 1 | 1170.6132 | -4.8  | 66    | 76  | 4  | 28.2  | 25 | A | ESAAEKPLDVL          | G | -0.1  | 3.82  |                 |

| hit | accession     | z | mass      | ppm   | start | end | mc | score | id | - | sequence          | + | gravy | pl    | modification    |
|-----|---------------|---|-----------|-------|-------|-----|----|-------|----|---|-------------------|---|-------|-------|-----------------|
| 447 | Q9HS52 SYP    | 1 | 1698.861  | 27.7  | 449   | 465 | 7  | 29.3  | 26 | I | AAEIVMVPLGEDSAARA | A | 0.6   | 3.82  |                 |
| 458 | Q9HMQ8 Q9HMQ8 | 1 | 1005.5131 | 10.5  | 77    | 87  | 3  | 26.9  | 24 | I | VG TGAGLYPTA      | A | 0.6   | 5.92  |                 |
| 462 | Q9HNS6 Q9HNS6 | 1 | 1063.5815 | 10.7  | 71    | 81  | 3  | 30.2  | 22 | I | GFGPIVGPHIA       | F | 0.9   | 7.84  |                 |
| 463 | Q9HMT5 Q9HMT5 | 1 | 1289.5888 | 9.2   | 257   | 268 | 3  | 26.8  | 25 | L | NDQGYINPEAVA      | R | -0.7  | 3     |                 |
| 469 | Q9HPV1 Q9HPV1 | 1 | 958.5964  | 20.2  | 33    | 41  | 5  | 14.3  | 13 | A | IAAFGLVRI         | S | 2.1   | 11.04 |                 |
| 508 | Q9HRK2 Q9HRK2 | 1 | 1139.5975 | -1.7  | 120   | 128 | 2  | 24.9  | 23 | V | AFLYETQRL         | - | -0.1  | 6.88  |                 |
| 548 | Q9HQM2 Q9HQM2 | 1 | 1687.8054 | -27.5 | 27    | 43  | 4  | 23.6  | 23 | V | FVLTDDHTGAPSSTAVA | A | 0.3   | 3.88  |                 |
| 553 | Q9HP32 PYRG   | 1 | 940.4978  | -14.5 | 535   | 543 | 3  | 23.5  | 23 | V | LERADVAPA         | G | 0.0   | 4.08  |                 |
| 647 | Q9HS38 Q9HS38 | 1 | 1717.7287 | -7.9  | 135   | 150 | 4  | 20.7  | 18 | L | DAASMRDFETGMAVSV  | R | 0.2   | 3.7   | 2 Oxidation (M) |
| 661 | Q9HHQ7 Q9HHQ7 | 1 | 731.4581  | -6.0  | 125   | 130 | 3  | 24.0  | 20 | I | LLNFIL            | H | 2.5   | 6.02  |                 |
| 670 | Q9HQB1 Q9HQB1 | 1 | 958.6328  | -17.7 | 70    | 77  | 4  | 19.6  | 13 | V | KAVFRLLI          | E | 1.6   | 11.48 |                 |

END OF LIST VII

| hit                                                                                  | accession       | z | mass      | ppm  | start | end | mc | score | id   | sequence                       | + | gravy | pl    | modification             |
|--------------------------------------------------------------------------------------|-----------------|---|-----------|------|-------|-----|----|-------|------|--------------------------------|---|-------|-------|--------------------------|
| <b>VIII. Purple membrane; trypsin digest; nLC-MALDI MS/MS; KR search specificity</b> |                 |   |           |      |       |     |    |       |      |                                |   |       |       |                          |
| 1                                                                                    | Q9HMMW9 Q9HMMW9 | 1 | 936.4851  | 7.2  | 613   | 620 | 0  | 57.7  | 13 K | AMAYVINR                       | E | 0.6   | 9.84  |                          |
| 1                                                                                    | Q9HMMW9 Q9HMMW9 | 1 | 1097.5393 | -4.6 | 621   | 629 | 0  | 51.2  | 13 R | EQFVSDVFK                      | G | -0.1  | 4.08  |                          |
| 1                                                                                    | Q9HMMW9 Q9HMMW9 | 1 | 1394.6678 | 3.3  | 431   | 443 | 0  | 53.1  | 13 R | ATGVEAVDDYTVR                  | L | -0.1  | 3.7   |                          |
| 1                                                                                    | Q9HMMW9 Q9HMMW9 | 1 | 1613.8009 | 3.1  | 238   | 252 | 0  | 39.6  | 13 R | LVSNPGQSEDAIQTR                | K | -0.8  | 4.08  |                          |
| 1                                                                                    | Q9HMMW9 Q9HMMW9 | 1 | 1740.7777 | 20.9 | 337   | 351 | 0  | 29.6  | 13 K | VMDLFDAPTNYENGR                | T | -0.8  | 3.7   |                          |
| 1                                                                                    | Q9HMMW9 Q9HMMW9 | 1 | 2016.0139 | -2.7 | 613   | 629 | 1  | 100.8 | 15 K | AMAYVINREQFVSDVFK              | G | 0.2   | 6.94  |                          |
| 1                                                                                    | Q9HMMW9 Q9HMMW9 | 1 | 2211.0498 | -1.4 | 173   | 191 | 0  | 26.7  | 13 K | QGEHEAFTLGWVADYPRPR            | N | -1.0  | 5.34  | Gln->pyro-Glu (N-term Q) |
| 1                                                                                    | Q9HMMW9 Q9HMMW9 | 1 | 2466.1598 | 6.9  | 192   | 214 | 0  | 183.2 | 13 R | NFMQLVQPDNTIYGGETAANGAR        | L | -0.5  | 4.08  |                          |
| 2                                                                                    | Q9HRQ9 Q9HRQ9   | 1 | 1835.9126 | 2.0  | 164   | 182 | 0  | 154.6 | 14 K | VIVNENGQAPSGGGGPVER            | S | -0.5  | 4.26  |                          |
| 2                                                                                    | Q9HRQ9 Q9HRQ9   | 1 | 2021.029  | -1.0 | 162   | 182 | 1  | 143.6 | 15 K | GKVIVNENGQAPSGGGGPVER          | S | -0.6  | 7.1   |                          |
| 2                                                                                    | Q9HRQ9 Q9HRQ9   | 1 | 2445.1812 | 9.0  | 80    | 102 | 0  | 153.1 | 15 K | VGPNNQNVFDPAEVYVSPGDTVK        | W | -0.5  | 3.7   |                          |
| 3                                                                                    | Q9HHP3 Q9HHP3   | 1 | 1761.905  | -0.3 | 161   | 178 | 0  | 118.3 | 16 R | ANTGSPFLGNAPVVFVSGK            | I | 0.2   | 10.1  |                          |
| 3                                                                                    | Q9HHP3 Q9HHP3   | 1 | 1811.8479 | 0.9  | 199   | 214 | 0  | 150.5 | 13 R | WTFSEFDTGPNVSVGLR              | D | -0.5  | 4.08  |                          |
| 3                                                                                    | Q9HHP3 Q9HHP3   | 1 | 2026.9848 | 3.4  | 179   | 197 | 0  | 127.8 | 14 K | ILSWDSSSVVAYDATTGQK            | R | -0.1  | 3.88  |                          |
| 4                                                                                    | Q9HMMW4 Q9HMMW4 | 1 | 944.4828  | 7.5  | 363   | 370 | 0  | 66.0  | 15 R | ANGWTQLR                       | N | -1.0  | 11.04 |                          |
| 4                                                                                    | Q9HMMW4 Q9HMMW4 | 1 | 1345.6878 | 0.9  | 327   | 338 | 0  | 108.2 | 15 R | VSIPSTDVPEFR                   | D | -0.1  | 4.08  |                          |
| 4                                                                                    | Q9HMMW4 Q9HMMW4 | 1 | 1367.6292 | -2.5 | 265   | 275 | 0  | 78.3  | 13 R | WSQQSVMAFER                    | A | -0.6  | 6.98  |                          |
| 4                                                                                    | Q9HMMW4 Q9HMMW4 | 1 | 1972.9854 | -3.3 | 321   | 338 | 1  | 31.0  | 15 K | GGEIDRVSIPTDVPFR               | D | -0.5  | 4.06  |                          |
| 4                                                                                    | Q9HMMW4 Q9HMMW4 | 1 | 2071.9673 | -2.6 | 481   | 497 | 0  | 39.3  | 13 K | LNQETTSPWNLMSNYFK              | T | -0.9  | 6.86  |                          |
| 4                                                                                    | Q9HMMW4 Q9HMMW4 | 1 | 3212.5163 | -2.0 | 396   | 425 | 0  | 64.3  | 13 R | AGVQNTLHPTWGPYAPENPTTFSGSLDEAR | R | -0.8  | 4.42  |                          |
| 5                                                                                    | Q9HHN1 Q9HHN1   | 1 | 775.3864  | 24.6 | 2     | 7   | 0  | 36.4  | 15 M | VEFEPR                         | S | -1.0  | 4.26  |                          |
| 5                                                                                    | Q9HHN1 Q9HHN1   | 1 | 1128.4611 | -2.3 | 8     | 16  | 0  | 54.4  | 13 R | SYEDFDPEK                      | R | -2.1  | 3.58  |                          |
| 5                                                                                    | Q9HHN1 Q9HHN1   | 1 | 1711.7537 | 1.6  | 397   | 411 | 0  | 132.0 | 13 R | DLNDEYDLGTSLSR                 | T | -1.2  | 3.36  |                          |
| 5                                                                                    | Q9HHN1 Q9HHN1   | 1 | 1723.857  | -2.8 | 293   | 308 | 0  | 65.9  | 14 R | GFAEAWQIIYSGTGPK               | T | -0.1  | 6.86  |                          |
| 5                                                                                    | Q9HHN1 Q9HHN1   | 1 | 2593.2661 | -8.3 | 178   | 201 | 0  | 69.4  | 13 K | QSPLSDTLLASGVSDVLDLWDHVR       | G | -0.1  | 3.86  | Gln->pyro-Glu (N-term Q) |
| 6                                                                                    | Q9HSA8 Q9HSA8   | 1 | 932.4062  | 6.9  | 82    | 88  | 0  | 30.3  | 13 R | TYTFDMR                        | T | -0.9  | 6.7   |                          |
| 6                                                                                    | Q9HSA8 Q9HSA8   | 1 | 1165.5768 | -0.3 | 56    | 65  | 0  | 45.2  | 13 K | QALTVFGEYR                     | G | -0.1  | 6.88  | Gln->pyro-Glu (N-term Q) |
| 6                                                                                    | Q9HSA8 Q9HSA8   | 1 | 1182.6033 | -3.0 | 56    | 65  | 0  | 84.7  | 13 K | QALTVFGEYR                     | G | -0.1  | 6.88  |                          |
| 6                                                                                    | Q9HSA8 Q9HSA8   | 1 | 1518.7678 | -5.7 | 103   | 116 | 0  | 94.5  | 14 R | DNSPVTADAVVYIR                 | V | 0.1   | 3.88  |                          |
| 6                                                                                    | Q9HSA8 Q9HSA8   | 1 | 1706.9719 | 1.5  | 66    | 81  | 0  | 124.7 | 13 R | GLLEPGINIPPVSR                 | T | 0.6   | 6.98  |                          |
| 7                                                                                    | Q9HMMZ3 Q9HMMZ3 | 1 | 727.3653  | -0.4 | 14    | 19  | 0  | 18.8  | 13 R | FATYAR                         | G | 0.0   | 9.84  |                          |
| 7                                                                                    | Q9HMMZ3 Q9HMMZ3 | 1 | 1081.4828 | -0.1 | 552   | 560 | 0  | 59.6  | 13 R | YNGEFEAPR                      | E | -1.5  | 4.26  |                          |
| 7                                                                                    | Q9HMMZ3 Q9HMMZ3 | 1 | 1188.5809 | 1.6  | 565   | 575 | 0  | 35.8  | 15 R | ATGVTLDEMPR                    | N | -0.3  | 4.08  |                          |
| 7                                                                                    | Q9HMMZ3 Q9HMMZ3 | 1 | 1364.6394 | -5.4 | 371   | 382 | 0  | 78.1  | 13 K | NVEDAVMNAFQK                   | G | -0.4  | 4.08  |                          |
| 7                                                                                    | Q9HMMZ3 Q9HMMZ3 | 1 | 2302.0641 | 13.5 | 245   | 265 | 0  | 112.7 | 15 R | VPADASPEEIGPSEIEDFSWK          | Q | -0.7  | 3.44  |                          |
| 7                                                                                    | Q9HMMZ3 Q9HMMZ3 | 1 | 3103.4258 | -8.0 | 434   | 461 | 0  | 28.1  | 13 R | SLATVFETAGVDYGILYEDEQNDGNDIR   | R | -0.5  | 3.28  |                          |
| 8                                                                                    | Q9HN95 Q9HN95   | 1 | 739.4341  | 15.8 | 336   | 343 | 0  | 51.9  | 13 R | GGLAGLPR                       | R | 0.3   | 11.04 |                          |

| hit | accession     | z | mass      | ppm  | start | end | mc | score | id | - | sequence                   | + | gravy | pl    | modification             |
|-----|---------------|---|-----------|------|-------|-----|----|-------|----|---|----------------------------|---|-------|-------|--------------------------|
| 8   | Q9HN95 Q9HN95 | 1 | 917.4971  | 3.3  | 155   | 162 | 0  | 43.8  | 13 | K | LFSDPLAR                   | V | 0.2   | 6.78  |                          |
| 8   | Q9HN95 Q9HN95 | 1 | 1064.5403 | -0.4 | 224   | 233 | 0  | 75.2  | 13 | R | GGSGYIGWLR                 | A | -0.1  | 9.84  |                          |
| 8   | Q9HN95 Q9HN95 | 1 | 1331.6735 | 4.6  | 222   | 233 | 1  | 31.3  | 15 | R | QRGGSGYIGWLR               | A | -0.7  | 11.14 | Gln->pyro-Glu (N-term Q) |
| 8   | Q9HN95 Q9HN95 | 1 | 1823.9377 | 2.1  | 403   | 421 | 0  | 119.3 | 13 | R | LSVNGSIPSALSFPADSPR        | I | -0.1  | 6.78  |                          |
| 9   | Q9HMI3 Q9HMI3 | 1 | 1258.7397 | -0.3 | 189   | 200 | 0  | 70.0  | 13 | R | NLAIFAAAILSR               | D | 1.5   | 11.04 |                          |
| 9   | Q9HMI3 Q9HMI3 | 1 | 1769.7421 | -2.5 | 139   | 152 | 0  | 119.1 | 13 | R | FIDDEYDYLLGSDR             | S | -1.1  | 3.36  |                          |
| 9   | Q9HMI3 Q9HMI3 | 1 | 1925.8432 | 5.6  | 138   | 152 | 1  | 34.1  | 13 | R | RFIDDEYDYLLGSDR            | S | -1.4  | 3.76  |                          |
| 9   | Q9HMI3 Q9HMI3 | 1 | 2143.0626 | 3.8  | 238   | 257 | 0  | 80.6  | 16 | R | LTAFFDDYWGGAPSVSAVIFK      | T | 0.5   | 3.88  |                          |
| 10  | Q9HP76 Q9HP76 | 1 | 968.5807  | 0.2  | 120   | 127 | 0  | 49.2  | 13 | R | WSIPIVVR                   | F | 1.2   | 11.04 |                          |
| 10  | Q9HP76 Q9HP76 | 1 | 1104.7019 | -9.3 | 342   | 351 | 0  | 26.9  | 13 | R | LPPNLALVLR                 | V | 1.0   | 11.04 |                          |
| 10  | Q9HP76 Q9HP76 | 1 | 1966.9748 | 3.8  | 389   | 407 | 0  | 83.0  | 14 | R | QFAAGTAEFQAAATSVLR         | V | 0.2   | 4.26  |                          |
| 10  | Q9HP76 Q9HP76 | 1 | 2048.9691 | -3.3 | 60    | 77  | 0  | 63.6  | 15 | R | VIEDELGPVDDVDFAFNR         | E | -0.2  | 3.32  |                          |
| 10  | Q9HP76 Q9HP76 | 1 | 2070.0058 | -0.9 | 128   | 146 | 0  | 77.2  | 15 | R | FVGQQAQFSLLENLADEFK        | T | 0.0   | 3.82  |                          |
| 11  | Q9HMX1 Q9HMX1 | 1 | 934.4509  | 3.2  | 18    | 25  | 0  | 34.6  | 13 | R | STDGLWTR                   | I | -1.0  | 6.78  |                          |
| 11  | Q9HMX1 Q9HMX1 | 1 | 1250.6078 | -2.8 | 408   | 418 | 0  | 13.8  | 13 | K | SFGQQPTVTMR                | K | -0.6  | 11.04 |                          |
| 11  | Q9HMX1 Q9HMX1 | 1 | 1272.7038 | -1.3 | 101   | 112 | 0  | 62.1  | 14 | R | STAQSLPTLLSR               | D | 0.0   | 11.04 |                          |
| 11  | Q9HMX1 Q9HMX1 | 1 | 1673.8009 | -1.7 | 113   | 127 | 0  | 84.0  | 14 | R | DVIPNQGYNDPSTVR            | S | -1.0  | 3.88  |                          |
| 11  | Q9HMX1 Q9HMX1 | 1 | 1711.8417 | 5.2  | 392   | 407 | 0  | 83.7  | 15 | R | GPALQVAEEEWVDAAK           | S | -0.3  | 3.68  |                          |
| 11  | Q9HMX1 Q9HMX1 | 1 | 1744.9724 | -3.0 | 85    | 100 | 0  | 13.4  | 13 | R | VVDVQLALSTFIEGVR           | S | 1.0   | 4.08  |                          |
| 12  | Q9HRR3 Q9HRR3 | 1 | 1119.5237 | 0.2  | 41    | 48  | 0  | 61.3  | 13 | R | LTYEYFER                   | S | -1.0  | 4.26  |                          |
| 12  | Q9HRR3 Q9HRR3 | 1 | 1287.5917 | 1.4  | 237   | 246 | 1  | 48.2  | 13 | R | EGYMYDLNKR                 | Y | -1.6  | 6.88  |                          |
| 12  | Q9HRR3 Q9HRR3 | 1 | 1522.8719 | 1.3  | 130   | 144 | 0  | 118.7 | 13 | K | LSALNPELAILGGQK            | L | 0.4   | 6.94  |                          |
| 12  | Q9HRR3 Q9HRR3 | 1 | 1845.8381 | 4.7  | 13    | 29  | 0  | 54.5  | 13 | R | TDGTGIVSPDETPTWR           | E | -1.1  | 3.5   |                          |
| 13  | Q9HN93 Q9HN93 | 1 | 1380.627  | 1.2  | 50    | 63  | 0  | 119.1 | 13 | K | GGAVGNYDGTTVDR             | T | -0.7  | 3.88  |                          |
| 13  | Q9HN93 Q9HN93 | 1 | 2638.2511 | 13.4 | 64    | 90  | 0  | 152.5 | 13 | R | TGTDEVTIDVGDANGGTYGFGPAAVR | V | 0.0   | 3.5   |                          |
| 14  | Q9HNQ9 Q9HNQ9 | 1 | 1138.5043 | -3.9 | 208   | 217 | 0  | 83.5  | 13 | R | SGGFVESVDR                 | A | -0.8  | 4.08  |                          |
| 14  | Q9HNQ9 Q9HNQ9 | 1 | 1210.5618 | 4.5  | 70    | 80  | 0  | 56.3  | 13 | K | AAFDAEPTSFR                | S | -0.3  | 4.08  |                          |
| 14  | Q9HNQ9 Q9HNQ9 | 1 | 1957.888  | 0.7  | 2     | 17  | 0  | 131.4 | 13 | M | SWFEVPDVLDSQYSMR           | Q | -0.5  | 3.7   |                          |
| 14  | Q9HNQ9 Q9HNQ9 | 1 | 1973.8829 | 0.5  | 2     | 17  | 0  | 31.0  | 13 | M | SWFEVPDVLDSQYSMR           | Q | -0.5  | 3.7   | Oxidation (M)            |
| 15  | Q9HPB1 SECY   | 1 | 813.4861  | 10.3 | 361   | 366 | 0  | 24.9  | 14 | R | WQVLIR                     | I | 0.6   | 11.04 |                          |
| 15  | Q9HPB1 SECY   | 1 | 1457.7085 | 1.1  | 399   | 411 | 0  | 14.7  | 13 | R | QIQNSGMQIPGFR              | K | -0.6  | 11.04 | Gln->pyro-Glu (N-term Q) |
| 15  | Q9HPB1 SECY   | 1 | 1474.7351 | 2.6  | 399   | 411 | 0  | 121.4 | 14 | R | QIQNSGMQIPGFR              | K | -0.6  | 11.04 |                          |
| 15  | Q9HPB1 SECY   | 1 | 1486.8945 | 2.8  | 287   | 299 | 0  | 58.0  | 13 | K | LIYASVLPMLVR               | A | 1.9   | 9.84  |                          |
| 15  | Q9HPB1 SECY   | 1 | 1585.8035 | 0.7  | 399   | 412 | 1  | 54.9  | 14 | R | QIQNSGMQIPGFRK             | N | -0.9  | 11.48 | Gln->pyro-Glu (N-term Q) |
| 16  | Q9HS26 Q9HS26 | 1 | 912.4453  | 1.9  | 427   | 433 | 0  | 28.5  | 13 | R | FNINSYR                    | R | -0.9  | 9.84  |                          |
| 16  | Q9HS26 Q9HS26 | 1 | 1017.5243 | -3.9 | 309   | 317 | 0  | 56.8  | 16 | R | ASDSLWIAR                  | E | 0.2   | 6.78  |                          |
| 16  | Q9HS26 Q9HS26 | 1 | 1661.8988 | 2.2  | 375   | 389 | 0  | 124.2 | 13 | R | AIQDFLLESVATTVR            | R | 0.6   | 4.08  |                          |
| 17  | Q9HRL4 Q9HRL4 | 1 | 1611.7199 | -0.5 | 86    | 99  | 0  | 99.7  | 13 | R | NFDDIDVTNATTMR             | W | -0.6  | 3.6   |                          |
| 17  | Q9HRL4 Q9HRL4 | 1 | 1797.7992 | -0.1 | 86    | 100 | 1  | 116.9 | 13 | R | NFDDIDVTNATTMRW            | - | -0.7  | 3.6   |                          |
| 18  | Q9HRF2 Q9HRF2 | 1 | 1164.5411 | 7.9  | 13    | 23  | 0  | 24.7  | 13 | R | GPESFDLTSGR                | I | -0.9  | 4.08  |                          |

| hit | accession     | z | mass      | ppm   | start | end | mc | score | id | - | sequence                 | + | gravy | pl    | modification             |
|-----|---------------|---|-----------|-------|-------|-----|----|-------|----|---|--------------------------|---|-------|-------|--------------------------|
| 18  | Q9HRF2 Q9HRF2 | 1 | 1169.6404 | -2.6  | 267   | 278 | 0  | 59.8  | 13 | R | IGLPASIEGTGR             | A | 0.2   | 6.98  |                          |
| 18  | Q9HRF2 Q9HRF2 | 1 | 1875.94   | 1.4   | 246   | 262 | 0  | 131.8 | 14 | R | GVEINAADMLPDLSYLR        | R | 0.2   | 3.7   |                          |
| 19  | P33518 COX1   | 1 | 1506.7314 | 5.0   | 33    | 47  | 0  | 57.8  | 14 | R | SYTPLSDVGGGLGER          | T | -0.4  | 4.08  |                          |
| 19  | P33518 COX1   | 1 | 2872.2253 | 6.8   | 535   | 557 | 0  | 153.7 | 13 | R | VDSTDPWDLEETDQFTNDWAWFR  | A | -1.2  | 3.22  |                          |
| 20  | P02945 BACR   | 1 | 986.6277  | 28.3  | 230   | 238 | 0  | 72.2  | 13 | K | VGFGILLR                 | S | 2.0   | 11.04 |                          |
| 20  | P02945 BACR   | 1 | 1451.7078 | 4.0   | 173   | 185 | 0  | 80.3  | 14 | K | AESMRPEVASTFK            | V | -0.5  | 7.1   |                          |
| 20  | P02945 BACR   | 1 | 1467.7028 | -0.9  | 173   | 185 | 0  | 31.3  | 13 | K | AESMRPEVASTFK            | V | -0.5  | 7.1   | Oxidation (M)            |
| 20  | P02945 BACR   | 1 | 2276.0193 | 3.3   | 239   | 262 | 1  | 57.5  | 13 | R | SRAIFGEAEPEPSAGDGAAATSD  | - | -0.4  | 3.5   |                          |
| 21  | Q9HS72 SECE   | 1 | 1393.6911 | -2.2  | 1     | 12  | 0  | 106.8 | 13 | - | MDVPLELSAYTR             | V | 0.0   | 4.08  |                          |
| 21  | Q9HS72 SECE   | 1 | 1409.6861 | -3.6  | 1     | 12  | 0  | 75.9  | 13 | - | MDVPLELSAYTR             | V | 0.0   | 4.08  | Oxidation (M)            |
| 21  | Q9HS72 SECE   | 1 | 1692.8359 | 0.9   | 16    | 30  | 0  | 101.4 | 15 | R | LASTPSWEEFSQIAK          | I | -0.4  | 4.26  |                          |
| 22  | Q9HN94 Q9HN94 | 1 | 1435.7096 | -2.0  | 41    | 53  | 0  | 38.1  | 14 | R | QFAFSPGTSEPIR            | V | -0.4  | 6.98  |                          |
| 22  | Q9HN94 Q9HN94 | 1 | 2175.9233 | 5.0   | 22    | 40  | 0  | 159.3 | 13 | R | DPGVYQADDDSYDVYVEAR      | Q | -1.0  | 3.26  |                          |
| 23  | Q9HSQ7 Q9HSQ7 | 1 | 1085.5216 | -2.6  | 139   | 147 | 0  | 36.7  | 13 | R | LNMDFFATK                | Q | 0.2   | 6.76  |                          |
| 23  | Q9HSQ7 Q9HSQ7 | 1 | 2074.9776 | 3.1   | 148   | 165 | 1  | 28.7  | 13 | K | QTGEMMSILSNDVNRLEK       | F | -0.7  | 4.44  | Gln->pyro-Glu (N-term Q) |
| 23  | Q9HSQ7 Q9HSQ7 | 1 | 2244.3093 | 3.7   | 52    | 73  | 0  | 113.7 | 13 | R | VLDLAPPVLLGLAIDSVIQGNK   | A | 1.0   | 3.88  |                          |
| 24  | Q9HND9 Q9HND9 | 1 | 1728.9522 | 2.7   | 8     | 26  | 0  | 175.6 | 13 | K | AAAALAVGLAALAAGYAER      | G | 1.2   | 6.88  |                          |
| 25  | Q9HRJ0 Q9HRJ0 | 1 | 1391.6681 | 1.3   | 26    | 38  | 0  | 45.0  | 13 | R | ADEQPPDPLPGTR            | T | -1.6  | 3.7   |                          |
| 25  | Q9HRJ0 Q9HRJ0 | 1 | 1529.8566 | -1.4  | 173   | 187 | 0  | 127.8 | 13 | R | TPVVGTAVFNALVSR          | R | 1.0   | 11.04 |                          |
| 26  | Q9HSQ2 HTPX   | 1 | 1401.7187 | -0.1  | 89    | 102 | 0  | 72.6  | 14 | K | VANMGVPNFAVGR            | K | 0.6   | 11.04 |                          |
| 26  | Q9HSQ2 HTPX   | 1 | 1608.6726 | -5.7  | 55    | 68  | 0  | 100.0 | 13 | R | SVGAEADMDEQEFPK          | I | -1.3  | 3.5   |                          |
| 27  | Q9HRS0 Q9HRS0 | 1 | 773.4395  | -18.0 | 21    | 28  | 0  | 19.2  | 16 | R | ALSVAASR                 | G | 0.9   | 11.04 |                          |
| 27  | Q9HRS0 Q9HRS0 | 1 | 1177.5979 | -6.5  | 191   | 201 | 0  | 32.6  | 14 | K | GYQTIVPDSAK              | T | -0.5  | 6.68  |                          |
| 27  | Q9HRS0 Q9HRS0 | 1 | 2529.2962 | 3.1   | 178   | 201 | 1  | 117.6 | 15 | K | GTIIVTDSPPENKGYQTIVPDSAK | T | -0.5  | 4.3   |                          |
| 28  | Q9HRL3 Q9HRL3 | 1 | 825.5072  | 9.3   | 624   | 631 | 0  | 35.1  | 13 | K | GVTLPPLAR                | G | 0.8   | 11.04 |                          |
| 28  | Q9HRL3 Q9HRL3 | 1 | 2323.1161 | 5.7   | 606   | 623 | 0  | 131.9 | 13 | R | TLLYNNYYQDEYQVWLAK       | G | -0.8  | 4.08  |                          |
| 29  | Q9HRR1 Q9HRR1 | 1 | 1136.5614 | -6.2  | 267   | 276 | 0  | 43.1  | 13 | K | SFVAFARPEN               | - | 0.0   | 6.98  |                          |
| 29  | Q9HRR1 Q9HRR1 | 1 | 1596.8835 | 1.9   | 180   | 193 | 0  | 105.2 | 13 | R | SQNTDNTIPIILIR           | S | 0.0   | 6.78  |                          |
| 30  | Q9HHR4 Q9HHR4 | 1 | 1001.5142 | 4.5   | 331   | 339 | 0  | 36.8  | 16 | K | SETATQIPR                | T | -1.0  | 6.98  |                          |
| 30  | Q9HHR4 Q9HHR4 | 1 | 1047.5713 | 2.6   | 450   | 459 | 0  | 68.1  | 13 | K | TGYLLGATPR               | K | 0.0   | 9.84  |                          |
| 30  | Q9HHR4 Q9HHR4 | 1 | 1381.6838 | 3.9   | 211   | 223 | 0  | 40.9  | 13 | K | TTLETAFSAGQTR            | G | -0.4  | 6.98  |                          |
| 31  | Q9HR99 Q9HR99 | 1 | 1494.7025 | -0.7  | 99    | 113 | 0  | 145.5 | 13 | K | ISIPDGASGFGTMDK          | D | 0.0   | 3.88  |                          |
| 31  | Q9HR99 Q9HR99 | 1 | 1510.6974 | -5.7  | 99    | 113 | 0  | 34.1  | 13 | K | ISIPDGASGFGTMDK          | D | 0.0   | 3.88  | Oxidation (M)            |
| 32  | Q9HQP2 Q9HQP2 | 1 | 888.4454  | 3.3   | 213   | 220 | 0  | 19.1  | 15 | R | AWDATGLR                 | D | -0.3  | 6.78  |                          |
| 32  | Q9HQP2 Q9HQP2 | 1 | 1277.6768 | 1.4   | 379   | 389 | 0  | 60.0  | 13 | R | TIGEAQPFLFR              | T | 0.1   | 6.98  |                          |
| 32  | Q9HQP2 Q9HQP2 | 1 | 1353.6718 | 0.8   | 741   | 752 | 0  | 65.3  | 13 | K | FSAPVVFYDGPR             | D | 0.2   | 6.7   |                          |
| 33  | Q9HP89 Q9HP89 | 1 | 1329.7405 | -3.2  | 225   | 237 | 0  | 71.3  | 13 | R | LSPYLAAGNIGVR            | E | 0.6   | 9.84  |                          |
| 33  | Q9HP89 Q9HP89 | 1 | 1364.6394 | -15.5 | 308   | 320 | 0  | 34.9  | 13 | R | GETGYPLVDAGMR            | Q | -0.4  | 4.08  |                          |
| 33  | Q9HP89 Q9HP89 | 1 | 1964.8864 | -4.0  | 238   | 256 | 0  | 36.0  | 13 | R | EVWAAVADAYDDATGNAAR      | N | -0.2  | 3.5   |                          |
| 34  | Q9HNE6 Q9HNE6 | 1 | 981.5607  | 0.8   | 213   | 222 | 0  | 62.2  | 13 | R | AGDILGPLAR               | F | 0.5   | 6.78  |                          |

| hit | accession     | z | mass      | ppm  | start | end | mc | score | id | - | sequence          | + | gravy | pl    | modification |
|-----|---------------|---|-----------|------|-------|-----|----|-------|----|---|-------------------|---|-------|-------|--------------|
| 34  | Q9HNE6 Q9HNE6 | 1 | 1594.8905 | 4.8  | 92    | 106 | 0  | 79.4  | 13 | R | GGLPMLVPLLGFPER   | Y | 0.7   | 6.98  |              |
| 35  | Q9HQ04 Q9HQ04 | 1 | 1459.7419 | -2.8 | 207   | 220 | 0  | 84.0  | 16 | R | QPYGIGDQVAIGSR    | E | -0.4  | 6.7   |              |
| 35  | Q9HQ04 Q9HQ04 | 1 | 1475.762  | 1.2  | 221   | 233 | 0  | 55.3  | 14 | R | EGVVQEVDVVFTR     | I | 0.3   | 3.82  |              |
| 36  | Q9HRM1 Q9HRM1 | 1 | 874.4483  | 9.9  | 119   | 125 | 0  | 33.2  | 15 | K | GVVQWMMR          | T | 0.1   | 11.04 |              |
| 36  | Q9HRM1 Q9HRM1 | 1 | 1464.6845 | 0.6  | 39    | 52  | 0  | 98.9  | 13 | R | ATYESAEVPTGNAR    | L | -0.8  | 4.26  |              |
| 37  | Q9HSC3 LONH   | 1 | 728.4181  | 11.5 | 430   | 436 | 0  | 39.6  | 15 | R | DLGGLVR           | V | 0.4   | 6.78  |              |
| 37  | Q9HSC3 LONH   | 1 | 1638.8002 | 2.1  | 464   | 476 | 0  | 71.9  | 13 | R | SIEQQFVDNYIQR     | R | -0.9  | 4.08  |              |
| 38  | Q9HRT0 Q9HRT0 | 1 | 1146.5669 | 1.8  | 505   | 514 | 0  | 44.7  | 14 | R | VPDVAVYNR         | V | -0.4  | 3.88  |              |
| 38  | Q9HRT0 Q9HRT0 | 1 | 1271.6721 | -5.0 | 559   | 570 | 0  | 76.5  | 15 | R | LLGDTDSPVSLR      | A | 0.0   | 3.88  |              |
| 39  | Q9HSC9 Q9HSC9 | 1 | 1300.6201 | -1.6 | 80    | 89  | 0  | 47.1  | 13 | K | QQVFFDTFNR        | F | -0.7  | 6.78  |              |
| 39  | Q9HSC9 Q9HSC9 | 1 | 1435.7282 | 1.3  | 94    | 105 | 0  | 68.5  | 15 | R | SLYNWLLPMGSR      | L | 0.0   | 9.84  |              |
| 40  | Q9HS12 Q9HS12 | 1 | 1504.8613 | 4.2  | 471   | 485 | 0  | 28.0  | 13 | R | SFSGILGTILALGR    | A | 1.1   | 11.04 |              |
| 40  | Q9HS12 Q9HS12 | 1 | 1694.9641 | -5.5 | 486   | 502 | 0  | 76.0  | 13 | R | AIGETAPLIMIGAPTIK | F | 1.0   | 6.94  |              |
| 41  | Q9HRL8 Q9HRL8 | 1 | 877.5021  | 7.5  | 118   | 125 | 0  | 32.8  | 13 | K | YSLLGGLR          | A | 0.5   | 9.84  |              |
| 41  | Q9HRL8 Q9HRL8 | 1 | 1553.8566 | -2.5 | 29    | 43  | 0  | 81.1  | 13 | R | VGPWGLGTIVVDSVR   | L | 0.8   | 6.78  |              |
| 42  | Q9HMG3 Q9HMG3 | 1 | 1721.7897 | -0.6 | 43    | 57  | 0  | 111.8 | 13 | R | ASTVPETDFPEPYNR   | S | -1.2  | 3.82  |              |
| 43  | Q9HR22 Q9HR22 | 1 | 1270.6823 | 2.3  | 234   | 244 | 0  | 108.6 | 15 | R | IPNVPFQFQPR       | D | -0.2  | 11.04 |              |
| 44  | Q9HPD4 RL3    | 1 | 1209.6254 | -1.2 | 234   | 244 | 0  | 104.0 | 13 | R | IGNLGPWNPSR       | V | -0.8  | 11.04 |              |
| 45  | Q9HMU9 Q9HMU9 | 1 | 764.3817  | -3.5 | 260   | 265 | 1  | 22.5  | 15 | R | FNTRDL            | - | -0.9  | 6.78  |              |
| 45  | Q9HMU9 Q9HMU9 | 1 | 773.4184  | 13.6 | 2     | 8   | 0  | 57.1  | 15 | M | SWAAIAR           | K | 0.5   | 11.04 |              |
| 45  | Q9HMU9 Q9HMU9 | 1 | 1784.9421 | -1.3 | 206   | 221 | 0  | 23.9  | 15 | R | QFLNQIPPTDAITAR   | A | -0.3  | 6.78  |              |
| 46  | P25964 BACS1  | 1 | 1323.6652 | -0.1 | 206   | 215 | 0  | 53.4  | 13 | K | VPYVYFFYAR        | R | 0.6   | 9.44  |              |
| 46  | P25964 BACS1  | 1 | 1780.0135 | -6.3 | 149   | 164 | 0  | 48.3  | 13 | R | VVPDVPEQIGLFNLLK  | N | 0.6   | 4.08  |              |
| 47  | Q9HMX0 Q9HMX0 | 1 | 1013.5869 | 4.0  | 52    | 60  | 0  | 37.8  | 14 | R | NLEISLGIR         | Y | 0.4   | 6.98  |              |
| 47  | Q9HMX0 Q9HMX0 | 1 | 1448.814  | 0.7  | 305   | 317 | 0  | 58.6  | 13 | K | VFSINGIGNLFIR     | A | 1.1   | 11.04 |              |
| 48  | Q9HRN3 Q9HRN3 | 1 | 1578.7638 | 2.4  | 83    | 98  | 0  | 90.9  | 13 | R | VSSPGGAVSGSEVQYR  | A | -0.3  | 6.88  |              |
| 49  | Q9HRR2 Q9HRR2 | 1 | 1801.9502 | 0.7  | 40    | 53  | 0  | 90.6  | 13 | R | IVDYLELLETLYYR    | V | 0.3   | 3.82  |              |
| 50  | Q9HN07 Q9HN07 | 1 | 1281.6353 | 4.1  | 599   | 609 | 0  | 90.4  | 13 | R | TPANTAELFYR       | L | -0.5  | 6.88  |              |
| 51  | Q9HN25 Q9HN25 | 1 | 1841.9312 | 7.6  | 129   | 144 | 0  | 89.8  | 15 | K | LNANFIEPGSLSYVYR  | N | 0.0   | 6.82  |              |
| 52  | Q9HHS5 Q9HHS5 | 1 | 1571.674  | 1.1  | 75    | 88  | 0  | 89.3  | 13 | R | YAAGDIDDEEFAR     | R | -0.8  | 3.42  |              |
| 53  | Q9HQU7 Q9HQU7 | 1 | 1514.7518 | 0.1  | 184   | 196 | 0  | 88.3  | 15 | R | AEGWEPFVQLQPR     | Y | -0.6  | 4.26  |              |
| 54  | Q9HRL1 Q9HRL1 | 1 | 950.5338  | -0.8 | 159   | 167 | 0  | 69.5  | 13 | K | AAGFAVLFR         | V | 1.6   | 11.04 |              |
| 54  | Q9HRL1 Q9HRL1 | 1 | 998.5185  | 8.9  | 349   | 356 | 0  | 13.4  | 13 | K | ALWIEDPR          | D | -0.5  | 4.08  |              |
| 55  | Q9HMK7 Q9HMK7 | 1 | 1190.6196 | 0.6  | 197   | 208 | 0  | 59.3  | 15 | R | YGIAWGAVGAAR      | N | 0.7   | 9.84  |              |
| 55  | Q9HMK7 Q9HMK7 | 1 | 1898.005  | 3.5  | 110   | 126 | 0  | 23.6  | 14 | K | TWITNSPIADVAVVWAR | D | 0.6   | 6.78  |              |
| 56  | Q9HR16 Q9HR16 | 1 | 1222.671  | -5.2 | 78    | 88  | 0  | 56.9  | 13 | R | AVTLPTFFATR       | L | 0.8   | 11.04 |              |
| 56  | Q9HR16 Q9HR16 | 1 | 1261.6303 | 1.6  | 13    | 24  | 0  | 22.8  | 15 | R | DVGPVVTGFSER      | A | 0.0   | 4.08  |              |
| 57  | Q9HSF7 TF2B7  | 1 | 1304.6724 | 0.6  | 136   | 146 | 0  | 78.7  | 15 | R | NLQFALSEIDR       | M | -0.2  | 4.08  |              |
| 58  | Q9HMD1 SECG   | 1 | 1768.7904 | 1.7  | 19    | 33  | 0  | 74.4  | 13 | R | YFSEDSNALQIDPR    | S | -1.1  | 3.5   |              |
| 59  | Q9HRZ2 Q9HRZ2 | 1 | 1436.7663 | 2.9  | 184   | 195 | 0  | 62.2  | 13 | K | LANLLFAYELDR      | R | 0.4   | 4.08  |              |

| hit | accession     | z | mass      | ppm   | start | end | mc | score | id | - | sequence               | + | gravy | pl    | modification |
|-----|---------------|---|-----------|-------|-------|-----|----|-------|----|---|------------------------|---|-------|-------|--------------|
| 60  | Q9HQ64 Q9HQ64 | 1 | 1147.5986 | 1.2   | 10    | 19  | 0  | 69.0  | 14 | R | SGSTTWLLQR             | L | -0.5  | 11.04 |              |
| 61  | Q9HPU7 Q9HPU7 | 1 | 813.4861  | 2.1   | 153   | 159 | 0  | 31.4  | 13 | R | WLAAVVR                | G | 1.5   | 11.04 |              |
| 61  | Q9HPU7 Q9HPU7 | 1 | 2368.2427 | -3.8  | 14    | 35  | 0  | 34.7  | 13 | R | SQFVPSWLVPAAAGDLPLTVSR | L | 0.3   | 4.08  |              |
| 62  | Q9HR80 Q9HR80 | 1 | 1071.5746 | 3.1   | 14    | 23  | 0  | 28.7  | 14 | R | SGMPLAEVLR             | I | 0.5   | 6.98  |              |
| 62  | Q9HR80 Q9HR80 | 1 | 1157.5903 | 1.6   | 4     | 13  | 0  | 34.9  | 15 | R | TVAFMYALSR             | S | 0.9   | 9.84  |              |
| 63  | Q9HNN6 Q9HNN6 | 1 | 1107.5423 | -6.8  | 48    | 56  | 0  | 47.7  | 13 | R | FLDWMATPK              | R | 0.0   | 6.76  |              |
| 63  | Q9HNN6 Q9HNN6 | 1 | 1315.6884 | 0.9   | 565   | 575 | 0  | 15.5  | 14 | R | LPFERPETATR            | A | -1.1  | 7.12  |              |
| 64  | P33741 HTR1   | 1 | 716.3969  | 8.4   | 2     | 7   | 0  | 29.5  | 17 | M | TIAWAR                 | R | 0.3   | 11.04 |              |
| 64  | P33741 HTR1   | 1 | 1697.7567 | 0.6   | 85    | 99  | 0  | 32.4  | 13 | R | TDEFGSLADSIEQMR        | Q | -0.7  | 3.58  |              |
| 65  | Q9HPA6 Q9HPA6 | 1 | 1378.6364 | -0.2  | 165   | 175 | 0  | 61.1  | 13 | K | YQEQAQELQDK            | M | -2.2  | 3.82  |              |
| 66  | Q9HRR0 Q9HRR0 | 1 | 1189.6417 | -3.9  | 80    | 89  | 0  | 54.1  | 13 | K | EFLPDVMIVK             | K | 0.9   | 4.08  |              |
| 67  | O51960 O51960 | 1 | 1084.5513 | 1.7   | 2     | 10  | 0  | 52.8  | 13 | M | SELPENIQR              | Q | -1.4  | 4.26  |              |
| 68  | Q9HND8 VATI   | 1 | 1016.4716 | -2.5  | 709   | 716 | 0  | 51.8  | 13 | K | YNPFGYTR               | N | -1.3  | 9.58  |              |
| 69  | Q9HQ63 DHSD   | 1 | 833.4396  | 8.5   | 8     | 15  | 0  | 50.4  | 14 | R | GLVADFGR               | W | 0.5   | 6.78  |              |
| 70  | Q9HRC9 Q9HRC9 | 1 | 1080.4699 | 0.7   | 104   | 111 | 0  | 48.9  | 13 | R | FDPEWMTR               | T | -1.3  | 4.08  |              |
| 71  | Q9HT02 Q9HT02 | 1 | 965.4389  | 9.9   | 230   | 237 | 0  | 48.0  | 13 | R | EGVNNFMR               | T | -0.8  | 6.98  |              |
| 72  | Q9HQ52 THYX   | 1 | 2101.999  | 1.9   | 158   | 176 | 0  | 47.5  | 15 | R | AVEDYQELLGLGMPPEDAR    | F | -0.5  | 3.5   |              |
| 73  | Q9HT01 Q9HT01 | 1 | 1299.5996 | 0.4   | 612   | 622 | 0  | 45.6  | 13 | R | LYNWFVSGNSR            | S | -0.9  | 9.84  |              |
| 74  | Q9HR62 Q9HR62 | 1 | 1118.6448 | 1.3   | 305   | 315 | 0  | 43.4  | 13 | R | APSVVPVSLPR            | S | 0.1   | 11.04 |              |
| 75  | Q9HRL2 Q9HRL2 | 1 | 923.4899  | 5.5   | 267   | 274 | 0  | 43.3  | 13 | K | MGTYALLR               | F | 0.6   | 9.84  |              |
| 76  | Q9HRC5 Q9HRC5 | 1 | 915.445   | 7.6   | 192   | 198 | 0  | 17.4  | 14 | R | ISYYSQR                | N | -1.1  | 9.58  |              |
| 76  | Q9HRC5 Q9HRC5 | 1 | 1128.5564 | 3.3   | 180   | 189 | 0  | 25.8  | 13 | R | LAWDSVPADR             | I | -0.3  | 3.88  |              |
| 77  | Q9HPQ5 Q9HPQ5 | 1 | 2024.9843 | 4.7   | 23    | 40  | 0  | 42.3  | 15 | K | TYLEYTPTGESIPAAAWR     | R | -0.4  | 4.26  |              |
| 78  | Q9HRL9 Q9HRL9 | 1 | 1336.7139 | 14.1  | 344   | 355 | 0  | 41.9  | 13 | R | LGGVVDIPEPR            | A | 0.0   | 4.08  |              |
| 79  | Q9HSL5 Q9HSL5 | 1 | 1148.5251 | 5.1   | 49    | 58  | 0  | 41.7  | 13 | K | AGGSYYVNR              | A | -0.8  | 9.44  |              |
| 80  | Q9HQU6 Q9HQU6 | 1 | 871.4916  | 4.6   | 16    | 22  | 0  | 39.5  | 16 | K | LVEWIGR                | V | 0.5   | 6.98  |              |
| 81  | Q9HN76 Q9HN76 | 1 | 975.5576  | 4.4   | 83    | 90  | 0  | 38.6  | 13 | R | FTLPMVLR               | A | 1.2   | 11.04 |              |
| 82  | P16102 BACH   | 1 | 887.4249  | 4.4   | 252   | 258 | 0  | 23.2  | 13 | R | WVANNER                | T | -1.4  | 6.98  |              |
| 82  | P16102 BACH   | 1 | 1140.6695 | 15.2  | 243   | 251 | 0  | 14.6  | 13 | K | YVFAFILLR              | W | 2.0   | 9.84  |              |
| 83  | Q48290 FTSZ   | 1 | 1550.8014 | -3.3  | 181   | 194 | 0  | 37.0  | 13 | K | AFSVMQIIAETVK          | G | 0.7   | 4.08  |              |
| 84  | P57699 ATKB   | 1 | 934.472   | -19.4 | 320   | 328 | 0  | 23.2  | 13 | K | TGTITTGER              | V | -0.8  | 6.98  |              |
| 85  | Q9HN02 Q9HN02 | 1 | 948.4777  | 8.2   | 170   | 178 | 0  | 35.9  | 14 | R | AVNQFTGGR              | A | -0.5  | 11.04 |              |
| 86  | Q9HR92 HTR6   | 1 | 758.4439  | 3.7   | 14    | 20  | 0  | 35.6  | 15 | R | ALPGFVR                | R | 0.9   | 11.04 |              |
| 87  | Q9HRM0 Q9HRM0 | 1 | 1309.6918 | -6.3  | 39    | 50  | 0  | 35.2  | 13 | R | EAFGSTPFILTK           | F | 0.3   | 6.94  |              |
| 88  | Q9HNK1 Q9HNK1 | 1 | 962.5008  | 1.7   | 352   | 360 | 0  | 34.1  | 14 | R | VFMSAVGPR              | G | 0.8   | 11.04 |              |
| 89  | Q9HRQ7 Q9HRQ7 | 1 | 1329.6758 | -5.4  | 153   | 162 | 1  | 33.7  | 14 | R | YVIRYPEFPF             | - | 0.1   | 6.82  |              |
| 90  | Q9HQ81 Q9HQ81 | 1 | 1109.5506 | 1.6   | 414   | 423 | 0  | 33.0  | 13 | R | GVFYPSDAVR             | T | 0.1   | 6.7   |              |
| 91  | Q9HN58 Q9HN58 | 1 | 1186.5328 | 4.4   | 1     | 9   | 0  | 32.7  | 13 | - | MELAEYFER              | A | -0.7  | 3.96  |              |
| 92  | Q9HQQ6 Q9HQQ6 | 1 | 1133.706  | -7.9  | 216   | 225 | 0  | 31.5  | 13 | R | IILTLYSLAK             | T | 1.6   | 9.72  |              |
| 93  | Q9HS60 Q9HS60 | 1 | 773.4296  | -1.0  | 170   | 175 | 1  | 30.6  | 15 | K | SWLGRR                 | L | -1.2  | 12.4  |              |

| hit | accession       | z | mass      | ppm   | start | end | mc | score | id | - | sequence               | + | gravy | pl    | modification  |
|-----|-----------------|---|-----------|-------|-------|-----|----|-------|----|---|------------------------|---|-------|-------|---------------|
| 94  | Q9HQP7 Q9HQP7   | 1 | 1949.0945 | -2.5  | 38    | 56  | 0  | 30.5  | 13 | R | LGIATAALPNQADLLAELR    | R | 0.6   | 4.08  |               |
| 95  | Q9HSE0 Q9HSE0   | 1 | 773.4144  | 6.1   | 116   | 122 | 1  | 19.6  | 16 | R | SPATRSR                | T | -1.6  | 12.4  |               |
| 96  | Q9HSA3 MFNA     | 1 | 1386.7078 | 29.6  | 211   | 224 | 0  | 29.1  | 15 | K | MGQAPVPAGGFLAR         | D | 0.4   | 11.04 | Oxidation (M) |
| 97  | Q9HPJ9 GCSPA    | 1 | 773.4031  | 20.7  | 48    | 54  | 0  | 28.5  | 16 | K | SEQAALR                | G | -0.7  | 6.98  |               |
| 98  | Q9HNI9 Q9HNI9   | 1 | 1349.7496 | 3.6   | 143   | 153 | 0  | 28.2  | 13 | R | VTPFPLNFLFR            | G | 0.8   | 11.04 |               |
| 99  | Q9HRC1 Q9HRC1   | 1 | 1728.9128 | 23.8  | 1     | 17  | 1  | 15.9  | 13 | - | MRTVGVVVNPIAGMGGR      | V | 0.6   | 12.4  | Oxidation (M) |
| 100 | Q9HSE1 Q9HSE1   | 1 | 1835.953  | -18.7 | 117   | 133 | 0  | 28.0  | 14 | R | EWVSAIQPQIAGGEVPR      | R | -0.2  | 4.26  |               |
| 101 | Q52005 Q52005   | 1 | 772.4265  | 13.6  | 254   | 260 | 0  | 28.0  | 15 | K | IGPVTMR                | M | 0.5   | 11.04 |               |
| 102 | Q9HNG0 Q9HNG0   | 1 | 960.5392  | 4.5   | 267   | 274 | 0  | 27.9  | 13 | K | ENLVFALR               | A | 0.6   | 6.98  |               |
| 103 | Q9HPX5 Q9HPX5   | 1 | 1593.8475 | -3.5  | 116   | 130 | 0  | 27.5  | 13 | R | AVQDPQSLGQPSVR         | A | -0.4  | 6.78  |               |
| 104 | Q9HR54 Q9HR54   | 1 | 992.508   | 2.8   | 246   | 253 | 0  | 27.0  | 14 | R | DAISVFWR               | T | 0.5   | 6.78  |               |
| 105 | Q9HMH6 Q9HMH6   | 1 | 1437.7616 | -6.0  | 100   | 112 | 0  | 26.7  | 14 | R | VIVFKPGDFSSSR          | A | 0.2   | 10.08 |               |
| 106 | Q9HPT0 Q9HPT0   | 1 | 852.4494  | 2.8   | 414   | 420 | 0  | 26.4  | 13 | R | LFFAER                 | H | 0.7   | 6.98  |               |
| 107 | Q9HHH4 Q9HHH4   | 1 | 1673.8009 | -0.7  | 142   | 154 | 1  | 14.9  | 14 | R | DVITRWEENLEDR          | R | -1.5  | 3.92  |               |
| 108 | Q9HRS2 Q9HRS2   | 1 | 787.4017  | 6.9   | 318   | 323 | 0  | 24.9  | 17 | R | FVfyGR                 | A | 0.6   | 9.84  |               |
| 109 | Q9HR04 Q9HR04   | 1 | 2764.3344 | 3.0   | 86    | 108 | 0  | 24.2  | 14 | R | YVALIDLINQYDDFSATQQTQR | S | -0.5  | 3.6   |               |
| 110 | Q9HNM8 Q9HNM8   | 1 | 773.4031  | 20.7  | 2     | 9   | 0  | 23.9  | 16 | M | ALDASAAR               | E | 0.3   | 6.78  |               |
| 111 | Q9HQV1 Q9HQV1   | 1 | 846.4422  | 7.3   | 1     | 6   | 0  | 23.8  | 14 | - | MLEWLR                 | E | 0.1   | 6.98  |               |
| 112 | Q9HNS2 Q9HNS2   | 1 | 1231.6131 | 2.4   | 160   | 171 | 0  | 23.6  | 15 | R | LANAAMNFGPAR           | W | 0.2   | 11.04 |               |
| 113 | Q9HP84 HTR4     | 1 | 865.5749  | 7.9   | 26    | 33  | 0  | 22.7  | 13 | K | AIALPLR                | S | 1.7   | 11.04 |               |
| 114 | Q9HMMW2 Q9HMMW2 | 1 | 741.3598  | 1.6   | 91    | 95  | 0  | 22.3  | 13 | R | AFYWR                  | R | -0.4  | 9.84  |               |
| 115 | Q9HPR5 Q9HPR5   | 1 | 968.5767  | 9.8   | 344   | 353 | 0  | 22.2  | 13 | R | NLGGIGAVLR             | Y | 0.9   | 11.04 |               |
| 116 | Q9HRK2 Q9HRK2   | 1 | 1265.5888 | -2.0  | 13    | 23  | 0  | 22.1  | 13 | R | TEPGLSDQYTR            | A | -1.5  | 4.08  |               |
| 117 | Q9HRY6 Q9HRY6   | 1 | 1409.7011 | -12.8 | 16    | 27  | 1  | 21.8  | 13 | R | TVERDDAAHLQR           | S | -1.3  | 5.28  |               |
| 118 | Q9HNB2 Q9HNB2   | 1 | 927.5753  | -28.4 | 581   | 588 | 0  | 21.1  | 16 | R | IIATLELR               | E | 1.2   | 6.98  |               |
| 119 | Q9HHI4 Q9HHI4   | 1 | 927.5389  | -0.8  | 516   | 523 | 0  | 20.9  | 16 | R | VLEALDIR               | V | 0.8   | 4.08  |               |
| 120 | Q9HSJ6 Q9HSJ6   | 1 | 1547.7831 | -8.3  | 212   | 225 | 0  | 20.8  | 15 | R | IEAGIEEFVASVER         | L | 0.3   | 3.8   |               |
| 121 | Q9HHS8 GVPO2    | 1 | 927.5389  | 10.9  | 63    | 70  | 0  | 20.5  | 16 | R | ILAEVVER               | S | 0.9   | 4.26  |               |
| 123 | Q9HMY6 Q9HMY6   | 1 | 1047.5536 | 19.6  | 154   | 163 | 0  | 20.2  | 13 | R | GVVVMPSGFR             | E | 1.0   | 11.04 |               |
| 124 | Q9HP19 Q9HP19   | 1 | 1194.5373 | 28.5  | 1     | 11  | 0  | 19.8  | 13 | - | MDGMSGELTVR            | Q | -0.2  | 4.08  |               |
| 125 | Q9HNT0 Q9HNT0   | 1 | 1673.7645 | 21.1  | 11    | 24  | 1  | 19.6  | 14 | R | GDVTEWPTDDDRRLR        | Y | -1.6  | 3.76  |               |
| 126 | Q9HQS2 Q9HQS2   | 1 | 897.5072  | 0.3   | 13    | 19  | 0  | 19.5  | 13 | R | LLDPVWR                | A | 0.2   | 6.78  |               |
| 127 | Q9HQS6 Q9HQS6   | 1 | 1141.6608 | -5.8  | 74    | 84  | 0  | 18.8  | 14 | R | VVAFANAVVPR            | V | 1.4   | 11.04 |               |
| 128 | Q9HQ42 Q9HQ42   | 1 | 728.4293  | -4.0  | 274   | 279 | 1  | 18.2  | 15 | R | VRDLAR                 | R | -0.5  | 10.88 |               |
| 129 | Q9HHW0 Q9HHW0   | 1 | 1017.4736 | 1.0   | 2     | 9   | 0  | 18.0  | 13 | M | ELCTMLHR               | E | 0.0   | 7.16  | Oxidation (M) |
| 130 | Q9HQS5 Q9HQS5   | 1 | 773.4085  | 22.1  | 121   | 125 | 1  | 17.4  | 16 | R | WWRAR                  | Y | -1.8  | 12.4  |               |
| 131 | Q9HQZ6 Q9HQZ6   | 1 | 813.4708  | 16.3  | 326   | 333 | 0  | 17.4  | 13 | R | ADLAIVGR               | E | 1.0   | 6.78  |               |
| 132 | Q9HRH2 Q9HRH2   | 1 | 846.4195  | 28.2  | 292   | 299 | 0  | 17.3  | 14 | K | SQASDALR               | E | -0.7  | 6.78  |               |
| 133 | Q9HRF4 Q9HRF4   | 1 | 728.4181  | 11.5  | 207   | 212 | 0  | 17.2  | 15 | R | LDLNVR                 | V | 0.1   | 6.78  |               |
| 134 | Q9HN17 Q9HN17   | 1 | 716.3817  | 29.6  | 203   | 209 | 0  | 17.2  | 17 | R | VGESAVR                | F | 0.1   | 6.98  |               |



| hit | accession     | z | mass      | ppm   | start | end | mc | score | id | - | sequence            | + | gravy | pl    | modification  |
|-----|---------------|---|-----------|-------|-------|-----|----|-------|----|---|---------------------|---|-------|-------|---------------|
| 135 | Q9HQ56 Q9HQ56 | 1 | 1105.555  | 16.7  | 395   | 405 | 0  | 17.1  | 13 | R | AIVASNMASAR         | G | 0.7   | 11.04 | Oxidation (M) |
| 136 | O51999 O51999 | 1 | 813.4708  | 20.8  | 924   | 931 | 0  | 17.0  | 13 | K | LDVGALAR            | G | 0.9   | 6.78  |               |
| 137 | Q9HN83 SYW1   | 1 | 773.433   | -18.9 | 67    | 73  | 1  | 16.8  | 16 | R | RVAAAMR             | N | 0.4   | 12.4  |               |
| 138 | Q9HQM4 Q9HQM4 | 1 | 2143.0393 | -14.7 | 302   | 320 | 1  | 16.8  | 14 | K | EQIEDIIGAVADDRTDDIR | E | -0.6  | 3.58  |               |
| 139 | Q9HMS7 Q9HMS7 | 1 | 1500.8816 | -3.8  | 7     | 20  | 0  | 16.7  | 13 | R | AQALLALFPAFLAR      | L | 1.4   | 11.04 |               |
| 140 | Q9HQB1 Q9HQB1 | 1 | 927.5389  | -0.8  | 16    | 23  | 0  | 16.7  | 16 | R | EIVDLIAR            | R | 0.9   | 4.08  |               |
| 141 | Q9HRS1 Q9HRS1 | 1 | 773.4283  | 0.8   | 153   | 159 | 1  | 16.2  | 15 | R | IEEGKAK             | L | -1.3  | 7.06  |               |
| 142 | Q9HPN3 Q9HPN3 | 1 | 1889.0119 | -25.4 | 22    | 38  | 2  | 16.2  | 15 | K | RTLEAADVVYSPGRLSR   | T | -0.4  | 9.84  |               |
| 143 | Q9HM88 Q9HM88 | 1 | 1346.7307 | -6.9  | 157   | 169 | 0  | 16.2  | 13 | R | GVLNGTANFVLSR       | M | 0.5   | 11.04 |               |
| 144 | Q9HR33 Q9HR33 | 1 | 773.4144  | 14.5  | 224   | 230 | 1  | 16.0  | 16 | R | LTGDGRR             | F | -1.5  | 10.88 |               |
| 145 | Q9HSS1 Q9HSS1 | 1 | 1409.684  | -0.6  | 134   | 146 | 0  | 16.0  | 13 | R | GGWAWNDAPAPLR       | L | -0.6  | 6.78  |               |
| 146 | Q9HSS0 Q9HSS0 | 1 | 1017.5356 | -26.9 | 18    | 26  | 1  | 15.9  | 15 | R | RDVFAPSAR           | H | -0.5  | 10.88 |               |
| 147 | Q9HS67 Q9HS67 | 1 | 1272.741  | -29.6 | 1     | 11  | 1  | 15.9  | 14 | - | MRPMGLLSKLLK        | S | 0.0   | 11.64 |               |
| 148 | Q9HRH6 Q9HRH6 | 1 | 1336.7602 | -20.5 | 19    | 31  | 0  | 15.8  | 13 | R | VAPLSLPEIVDGK       | A | 0.5   | 4.08  |               |
| 149 | Q9HI31 Q9HI31 | 1 | 1027.6138 | -29.5 | 53    | 60  | 1  | 15.7  | 15 | K | QTRELIIR            | N | -0.5  | 10.88 |               |
| 150 | Q9HRA1 Q9HRA1 | 1 | 887.548   | 8.7   | 100   | 107 | 0  | 15.6  | 13 | R | AAPYILLK            | D | 1.1   | 9.72  |               |
| 151 | Q9HQ54 Q9HQ54 | 1 | 1158.6357 | 17.1  | 505   | 515 | 0  | 15.5  | 14 | R | LTGNTIAVNTR         | S | 0.0   | 11.04 |               |
| 152 | Q9HP79 Q9HP79 | 1 | 813.4821  | 7.0   | 225   | 231 | 1  | 15.3  | 13 | R | ELRAAVR             | A | -0.1  | 10.88 |               |
| 153 | Q9HSL0 Q9HSL0 | 1 | 1119.556  | -19.1 | 44    | 52  | 0  | 15.1  | 13 | R | LTPQEVDYR           | L | -1.2  | 4.08  |               |
| 155 | Q9HQD7 HUTG   | 1 | 1629.8071 | -25.6 | 197   | 212 | 1  | 14.9  | 13 | R | DQGGRIVTSDAVAADR    | D | -0.4  | 4.18  |               |
| 160 | Q9HNA3 Q9HNA3 | 1 | 1140.6727 | -9.5  | 62    | 73  | 1  | 14.4  | 13 | R | VGVALAAAARSR        | G | 0.9   | 12.4  |               |
| 161 | Q9HS87 Q9HS87 | 1 | 842.4974  | 11.9  | 161   | 168 | 0  | 14.3  | 13 | R | GIIQGSRLR           | E | 0.4   | 11.04 |               |
| 163 | Q9HPK0 GCSPB  | 1 | 1552.7158 | -27.8 | 303   | 316 | 0  | 14.2  | 13 | R | QSAGGDYELYTPPR      | S | -1.3  | 4.08  |               |
| 167 | Q9HRU7 Q9HRU7 | 1 | 1829.0638 | -7.9  | 759   | 775 | 0  | 13.9  | 13 | K | AIVPFAFVVTGVMLLR    | R | 1.8   | 11.04 |               |
| 168 | Q9HN78 LIPA   | 1 | 1024.589  | -6.6  | 172   | 179 | 2  | 15.6  | 13 | R | RQVPVRDR            | R | -1.7  | 12.1  |               |
| 176 | Q9HRT5 Q9HRT5 | 1 | 739.4453  | -10.8 | 421   | 427 | 1  | 14.8  | 13 | R | RVAAPAR             | R | -0.1  | 12.4  |               |
| 178 | Q9HMG7 Q9HMG7 | 1 | 1598.7551 | -15.3 | 40    | 52  | 0  | 13.1  | 13 | R | YGGYQMPLETVWR       | A | -0.6  | 6.82  |               |

END OF LIST VIII

| hit                                                                                | accession   | z | mass      | ppm  | start | end | mc | score | id | - | sequence              | + | gravy | pl    | modification |
|------------------------------------------------------------------------------------|-------------|---|-----------|------|-------|-----|----|-------|----|---|-----------------------|---|-------|-------|--------------|
| <b>IX. Purple membrane; trypsin digest; nLC-MALDI MS/MS; no search specificity</b> |             |   |           |      |       |     |    |       |    |   |                       |   |       |       |              |
| 1                                                                                  | P02945 BACR | 1 | 799.3348  | 29.8 | 249   | 257 | 0  | 38.9  | 32 | A | PEPSAGDGA             | A | -0.9  |       | 3            |
| 1                                                                                  | P02945 BACR | 1 | 830.5378  | 0.4  | 232   | 238 | 0  | 27.5  | 22 | G | FGLILLR               | S | 2.0   | 11.04 |              |
| 1                                                                                  | P02945 BACR | 1 | 870.3719  | 2.3  | 249   | 258 | 0  | 88.0  | 30 | A | PEPSAGDGAA            | A | -0.6  |       | 3            |
| 1                                                                                  | P02945 BACR | 1 | 887.5593  | -4.1 | 231   | 238 | 0  | 44.5  | 25 | V | GFGILLR               | S | 1.7   | 11.04 |              |
| 1                                                                                  | P02945 BACR | 1 | 903.3934  | 0.7  | 251   | 261 | 0  | 107.0 | 33 | E | PSAGDGAAATS           | D | -0.1  |       | 3.1          |
| 1                                                                                  | P02945 BACR | 1 | 986.6277  | 28.3 | 230   | 238 | 0  | 72.2  | 14 | K | VGFGILLR              | S | 2.0   | 11.04 |              |
| 1                                                                                  | P02945 BACR | 1 | 988.4648  | 6.1  | 173   | 181 | 0  | 53.3  | 35 | K | AESMRPEVA             | S | -0.5  |       | 4.26         |
| 1                                                                                  | P02945 BACR | 1 | 1069.508  | -0.7 | 48    | 56  | 0  | 55.4  | 33 | V | SDPDAKKFY             | A | -1.5  |       | 6.8          |
| 1                                                                                  | P02945 BACR | 1 | 1129.4887 | 5.5  | 249   | 261 | 0  | 121.7 | 32 | A | PEPSAGDGAAATS         | D | -0.5  |       | 3            |
| 1                                                                                  | P02945 BACR | 1 | 1175.5723 | 1.3  | 87    | 95  | 0  | 57.4  | 35 | G | EQNPIYWAR             | Y | -1.4  |       | 6.88         |
| 1                                                                                  | P02945 BACR | 1 | 1200.5258 | 2.1  | 248   | 261 | 0  | 138.7 | 32 | E | APEPSAGDGAAATS        | D | -0.3  |       | 3            |
| 1                                                                                  | P02945 BACR | 1 | 1216.5612 | -9.3 | 241   | 252 | 0  | 106.0 | 33 | R | AIFGEAEPEPS           | A | -0.2  |       | 3.02         |
| 1                                                                                  | P02945 BACR | 1 | 1227.64   | -0.6 | 18    | 27  | 0  | 34.6  | 34 | I | TGRPEWIWLA            | L | -0.2  |       | 6.98         |
| 1                                                                                  | P02945 BACR | 1 | 1232.5938 | -1.3 | 86    | 95  | 0  | 64.9  | 35 | G | GEQNPIYWAR            | Y | -1.3  |       | 6.88         |
| 1                                                                                  | P02945 BACR | 1 | 1240.689  | -8.9 | 33    | 43  | 0  | 60.5  | 33 | L | MGLGLTYFLVK           | G | 1.2   |       | 9.72         |
| 1                                                                                  | P02945 BACR | 1 | 1242.5822 | -4.3 | 92    | 100 | 0  | 36.6  | 33 | I | YWARYADWL             | F | -0.6  |       | 6.64         |
| 1                                                                                  | P02945 BACR | 1 | 1287.5983 | -7.6 | 241   | 253 | 0  | 99.9  | 34 | R | AIFGEAEPEPSA          | G | 0.0   |       | 3.02         |
| 1                                                                                  | P02945 BACR | 1 | 1289.6153 | -1.9 | 85    | 95  | 0  | 78.3  | 35 | F | GGEQNPIYWAR           | Y | -1.2  |       | 6.88         |
| 1                                                                                  | P02945 BACR | 1 | 1323.6129 | 0.8  | 173   | 184 | 0  | 44.3  | 34 | K | AESMRPEVASTF          | K | -0.2  |       | 4.26         |
| 1                                                                                  | P02945 BACR | 1 | 1380.6707 | 3.6  | 174   | 185 | 0  | 52.5  | 35 | A | ESMRPEVASTFK          | V | -0.7  |       | 7.1          |
| 1                                                                                  | P02945 BACR | 1 | 1381.703  | 0.6  | 95    | 105 | 0  | 63.3  | 34 | A | RYADWLFTTPL           | L | -0.1  |       | 6.7          |
| 1                                                                                  | P02945 BACR | 1 | 1451.7078 | 4.0  | 173   | 185 | 0  | 80.3  | 35 | K | AESMRPEVASTFK         | V | -0.5  |       | 7.1          |
| 1                                                                                  | P02945 BACR | 1 | 1459.6943 | 2.9  | 239   | 252 | 0  | 113.3 | 35 | R | SRAIFGEAEPEPS         | A | -0.5  |       | 3.96         |
| 1                                                                                  | P02945 BACR | 1 | 1530.7314 | -0.6 | 239   | 253 | 0  | 98.6  | 35 | R | SRAIFGEAEPEPSA        | G | -0.4  |       | 3.96         |
| 1                                                                                  | P02945 BACR | 1 | 1533.7365 | 3.7  | 83    | 95  | 0  | 46.3  | 35 | V | PFGGQNPIYWAR          | Y | -0.9  |       | 6.88         |
| 1                                                                                  | P02945 BACR | 1 | 1587.7053 | -1.2 | 241   | 257 | 0  | 139.4 | 33 | R | AIFGEAEPEPSAGDGA      | A | -0.2  |       | 2.88         |
| 1                                                                                  | P02945 BACR | 1 | 1587.7529 | -2.3 | 239   | 254 | 0  | 76.2  | 35 | R | SRAIFGEAEPEPSAG       | D | -0.4  |       | 3.96         |
| 1                                                                                  | P02945 BACR | 1 | 1658.7424 | -3.7 | 241   | 258 | 0  | 131.6 | 33 | R | AIFGEAEPEPSAGDGAA     | A | -0.1  |       | 2.88         |
| 1                                                                                  | P02945 BACR | 1 | 1702.7798 | -0.5 | 239   | 255 | 0  | 36.8  | 34 | R | SRAIFGEAEPEPSAGD      | G | -0.6  |       | 3.68         |
| 1                                                                                  | P02945 BACR | 1 | 1759.8013 | 0.4  | 239   | 256 | 0  | 109.7 | 34 | R | SRAIFGEAEPEPSAGDG     | A | -0.6  |       | 3.68         |
| 1                                                                                  | P02945 BACR | 1 | 1763.8454 | 1.9  | 81    | 95  | 0  | 92.1  | 35 | T | MVPFGGEQNPIYWAR       | Y | -0.4  |       | 6.88         |
| 1                                                                                  | P02945 BACR | 1 | 1801.8828 | 2.9  | 92    | 105 | 0  | 74.3  | 36 | I | YWARYADWLFTTPL        | L | -0.1  |       | 6.64         |
| 1                                                                                  | P02945 BACR | 1 | 1830.8384 | 2.1  | 239   | 257 | 0  | 122.9 | 34 | R | SRAIFGEAEPEPSAGDGA    | A | -0.4  |       | 3.68         |
| 1                                                                                  | P02945 BACR | 1 | 1901.8755 | -2.6 | 239   | 258 | 0  | 172.1 | 34 | R | SRAIFGEAEPEPSAGDGAA   | A | -0.3  |       | 3.68         |
| 1                                                                                  | P02945 BACR | 1 | 1917.8592 | 3.5  | 241   | 261 | 0  | 180.4 | 34 | R | AIFGEAEPEPSAGDGAAATS  | D | 0.0   |       | 2.88         |
| 1                                                                                  | P02945 BACR | 1 | 1972.9126 | 5.8  | 239   | 259 | 0  | 67.9  | 35 | R | SRAIFGEAEPEPSAGDGAAA  | T | -0.2  |       | 3.68         |
| 1                                                                                  | P02945 BACR | 1 | 2073.9603 | -3.5 | 239   | 260 | 0  | 94.0  | 35 | R | SRAIFGEAEPEPSAGDGAAAT | S | -0.2  |       | 3.68         |

| hit | accession       | z | mass      | ppm  | start | end | mc | score | id | - | sequence                     | + | gravy | pI    | modification             |
|-----|-----------------|---|-----------|------|-------|-----|----|-------|----|---|------------------------------|---|-------|-------|--------------------------|
| 1   | P02945 BACR     | 1 | 2160.9923 | 0.6  | 239   | 261 | 0  | 194.1 | 35 | R | SRAIFGEAEPEPSAGDGAAATS       | D | -0.3  | 3.68  |                          |
| 1   | P02945 BACR     | 1 | 2276.0193 | 3.3  | 239   | 262 | 0  | 57.5  | 34 | R | SRAIFGEAEPEPSAGDGAAATSD      | - | -0.4  | 3.5   |                          |
| 2   | Q9HMMW9 Q9HMMW9 | 1 | 936.4851  | 7.2  | 613   | 620 | 0  | 57.7  | 32 | K | AMAYVINR                     | E | 0.6   | 9.84  |                          |
| 2   | Q9HMMW9 Q9HMMW9 | 1 | 958.4582  | 5.1  | 598   | 605 | 0  | 51.9  | 35 | Y | YVGFNMTK                     | V | -0.1  | 9.72  |                          |
| 2   | Q9HMMW9 Q9HMMW9 | 1 | 1097.5393 | -4.6 | 621   | 629 | 0  | 51.2  | 33 | R | EQFVSDVFK                    | G | -0.1  | 4.08  |                          |
| 2   | Q9HMMW9 Q9HMMW9 | 1 | 1149.5931 | -2.5 | 632   | 642 | 0  | 61.1  | 34 | R | GVGAFHLQPPQ                  | L | -0.1  | 7.84  |                          |
| 2   | Q9HMMW9 Q9HMMW9 | 1 | 1164.5928 | 4.2  | 622   | 631 | 0  | 60.0  | 34 | E | QFVSDVFKGR                   | G | -0.3  | 10.08 | Gln->pyro-Glu (N-term Q) |
| 2   | Q9HMMW9 Q9HMMW9 | 1 | 1222.5692 | -1.5 | 596   | 605 | 0  | 45.5  | 34 | D | TYVGFNMTK                    | V | -0.3  | 9.52  |                          |
| 2   | Q9HMMW9 Q9HMMW9 | 1 | 1262.6772 | -2.0 | 632   | 643 | 0  | 87.5  | 33 | R | GVGAFHLQPPQL                 | F | 0.2   | 7.84  |                          |
| 2   | Q9HMMW9 Q9HMMW9 | 1 | 1340.6547 | -1.3 | 613   | 623 | 0  | 61.9  | 34 | K | AMAYVINREQF                  | V | 0.1   | 6.88  |                          |
| 2   | Q9HMMW9 Q9HMMW9 | 1 | 1394.6678 | 3.3  | 431   | 443 | 0  | 53.1  | 35 | R | ATGVEAVDDYTVR                | L | -0.1  | 3.7   |                          |
| 2   | Q9HMMW9 Q9HMMW9 | 1 | 1409.7456 | -4.0 | 632   | 644 | 0  | 91.6  | 33 | R | GVGAFHLQPPQLF                | S | 0.4   | 7.84  |                          |
| 2   | Q9HMMW9 Q9HMMW9 | 1 | 1450.6803 | -1.7 | 594   | 605 | 0  | 89.4  | 35 | T | IDTYVGFNMTK                  | V | -0.2  | 6.62  |                          |
| 2   | Q9HMMW9 Q9HMMW9 | 1 | 1496.7776 | -1.9 | 632   | 645 | 0  | 101.4 | 34 | R | GVGAFHLQPPQLFS               | D | 0.3   | 7.84  |                          |
| 2   | Q9HMMW9 Q9HMMW9 | 1 | 1551.7279 | -8.2 | 593   | 605 | 0  | 68.9  | 34 | S | TIDTYVGFNMTK                 | V | -0.2  | 6.62  |                          |
| 2   | Q9HMMW9 Q9HMMW9 | 1 | 1562.7881 | -5.1 | 129   | 140 | 0  | 37.9  | 35 | E | LNWLQYQSPTWK                 | E | -1.1  | 9.72  |                          |
| 2   | Q9HMMW9 Q9HMMW9 | 1 | 1613.8009 | 3.1  | 238   | 252 | 0  | 39.6  | 35 | R | LVSNPGQSEDAIQR               | K | -0.8  | 4.08  |                          |
| 2   | Q9HMMW9 Q9HMMW9 | 1 | 1691.8307 | 1.2  | 128   | 140 | 0  | 44.7  | 35 | Y | ELNWLQYQSPTWK                | E | -1.3  | 6.86  |                          |
| 2   | Q9HMMW9 Q9HMMW9 | 1 | 1737.8284 | 1.2  | 591   | 605 | 0  | 141.8 | 35 | S | VSTIDTYVGFNMTK               | V | 0.1   | 6.62  |                          |
| 2   | Q9HMMW9 Q9HMMW9 | 1 | 1753.8233 | -3.3 | 591   | 605 | 0  | 63.5  | 34 | S | VSTIDTYVGFNMTK               | V | 0.1   | 6.62  | Oxidation (M)            |
| 2   | Q9HMMW9 Q9HMMW9 | 1 | 1911.8924 | -1.9 | 589   | 605 | 0  | 101.2 | 35 | S | SSVSTIDTYVGFNMTK             | V | 0.0   | 6.62  |                          |
| 2   | Q9HMMW9 Q9HMMW9 | 1 | 1998.9245 | -1.9 | 588   | 605 | 0  | 72.5  | 35 | N | SSSVSTIDTYVGFNMTK            | V | -0.1  | 6.62  |                          |
| 2   | Q9HMMW9 Q9HMMW9 | 1 | 2016.0139 | -2.7 | 613   | 629 | 0  | 100.8 | 36 | K | AMAYVINREQFVSDVFK            | G | 0.2   | 6.94  |                          |
| 2   | Q9HMMW9 Q9HMMW9 | 1 | 2466.1598 | 6.9  | 192   | 214 | 0  | 183.2 | 36 | R | NFMQLVQPDNTIYGGETAANGAR      | L | -0.5  | 4.08  |                          |
| 3   | Q9HN93 Q9HN93   | 1 | 1326.5517 | -2.5 | 38    | 49  | 0  | 109.9 | 30 | A | QAYDGFWSGDAK                 | G | -1.0  | 3.88  | Gln->pyro-Glu (N-term Q) |
| 3   | Q9HN93 Q9HN93   | 1 | 1380.627  | 1.2  | 50    | 63  | 0  | 119.1 | 34 | K | GGAVGNYDGTTVDR               | T | -0.7  | 3.88  |                          |
| 3   | Q9HN93 Q9HN93   | 1 | 1414.6153 | -2.9 | 37    | 49  | 0  | 85.5  | 31 | A | AQAYDGFWSGDAK                | G | -0.8  | 3.88  |                          |
| 3   | Q9HN93 Q9HN93   | 1 | 2638.2511 | 13.4 | 64    | 90  | 0  | 152.5 | 36 | R | TGTDEVITIDVGDANGGTYGFGPAAVR  | V | 0.0   | 3.5   |                          |
| 3   | Q9HN93 Q9HN93   | 1 | 2689.1681 | 8.6  | 38    | 63  | 0  | 199.5 | 33 | A | QAYDGFWSGDAKGGAVGNYDGTTVDR   | T | -0.8  | 3.88  | Gln->pyro-Glu (N-term Q) |
| 3   | Q9HN93 Q9HN93   | 1 | 2719.1409 | 12.1 | 211   | 237 | 0  | 72.8  | 31 | R | TPAPDSSGAFDYEPPGGTDDQPAIPEA  | D | -1.0  | 2.64  |                          |
| 3   | Q9HN93 Q9HN93   | 1 | 2875.242  | 13.1 | 210   | 237 | 0  | 89.1  | 33 | R | RTPAPDSSGAFDYEPPGGTDDQPAIPEA | D | -1.1  | 3.22  |                          |
| 4   | Q9HHN1 Q9HHN1   | 1 | 775.3864  | 24.6 | 2     | 7   | 0  | 36.4  | 34 | M | VEFEPR                       | S | -1.0  | 4.26  |                          |
| 4   | Q9HHN1 Q9HHN1   | 1 | 968.5906  | 23.8 | 36    | 45  | 0  | 27.7  | 27 | A | VGIVLLGLDA                   | Q | 2.2   | 3.1   |                          |
| 4   | Q9HHN1 Q9HHN1   | 1 | 1128.4611 | -2.3 | 8     | 16  | 0  | 54.4  | 28 | R | SYEDFDPEK                    | R | -2.1  | 3.58  |                          |
| 4   | Q9HHN1 Q9HHN1   | 1 | 1483.7056 | 1.4  | 189   | 201 | 0  | 86.8  | 34 | A | SGVSDVDLWDHVR                | G | -0.4  | 4.16  |                          |
| 4   | Q9HHN1 Q9HHN1   | 1 | 1596.7267 | 0.6  | 398   | 411 | 0  | 95.5  | 34 | D | LNDEYDLGTSLSR                | T | -1.0  | 3.5   |                          |
| 4   | Q9HHN1 Q9HHN1   | 1 | 1667.8268 | 0.8  | 187   | 201 | 0  | 111.2 | 35 | L | LASGVSDVDLWDHVR              | G | 0.1   | 4.16  |                          |
| 4   | Q9HHN1 Q9HHN1   | 1 | 1711.7537 | 1.6  | 397   | 411 | 0  | 132.0 | 33 | R | DLNDEYDLGTSLSR               | T | -1.2  | 3.36  |                          |
| 4   | Q9HHN1 Q9HHN1   | 1 | 1723.857  | -2.8 | 293   | 308 | 0  | 65.9  | 35 | R | GFAEAWQIIYSGTGPK             | T | -0.1  | 6.86  |                          |
| 4   | Q9HHN1 Q9HHN1   | 1 | 1780.9108 | -0.5 | 186   | 201 | 0  | 134.0 | 35 | T | LLASGVSDVDLWDHVR             | G | 0.3   | 4.16  |                          |

| hit | accession       | z | mass      | ppm  | start | end | mc | score | id | - | sequence                       | + | gravy | pl    | modification             |
|-----|-----------------|---|-----------|------|-------|-----|----|-------|----|---|--------------------------------|---|-------|-------|--------------------------|
| 4   | Q9HHN1 Q9HHN1   | 1 | 2593.2661 | -8.3 | 178   | 201 | 0  | 69.4  | 36 | K | QSPLSDTLLASGVSDVLDLWDHVR       | G | -0.1  | 3.86  | Gln->pyro-Glu (N-term Q) |
| 5   | Q9HN95 Q9HN95   | 1 | 739.4341  | 15.8 | 336   | 343 | 0  | 51.9  | 26 | R | GGLAGLPR                       | R | 0.3   | 11.04 |                          |
| 5   | Q9HN95 Q9HN95   | 1 | 898.4508  | 8.3  | 413   | 421 | 0  | 35.3  | 32 | A | LSGPADSPR                      | I | -0.8  | 6.78  |                          |
| 5   | Q9HN95 Q9HN95   | 1 | 917.4971  | 3.3  | 155   | 162 | 0  | 43.8  | 33 | K | LFSDPLAR                       | V | 0.2   | 6.78  |                          |
| 5   | Q9HN95 Q9HN95   | 1 | 1064.5403 | -0.4 | 224   | 233 | 0  | 75.2  | 33 | R | GGSGYIGWLR                     | A | -0.1  | 9.84  |                          |
| 5   | Q9HN95 Q9HN95   | 1 | 1353.6888 | 0.3  | 408   | 421 | 0  | 92.4  | 34 | G | SIPSALSGPADSPR                 | I | -0.3  | 6.78  |                          |
| 5   | Q9HN95 Q9HN95   | 1 | 1410.7103 | 0.2  | 407   | 421 | 0  | 115.7 | 34 | N | GSIPSALSGPADSPR                | I | -0.3  | 6.78  |                          |
| 5   | Q9HN95 Q9HN95   | 1 | 1623.8216 | -0.6 | 405   | 421 | 0  | 151.7 | 35 | S | VNGSIPSALSGPADSPR              | I | -0.2  | 6.78  |                          |
| 5   | Q9HN95 Q9HN95   | 1 | 1823.9377 | 2.1  | 403   | 421 | 0  | 119.3 | 35 | R | LSVNGSIPSALSGPADSPR            | I | -0.1  | 6.78  |                          |
| 6   | Q9HMMW4 Q9HMMW4 | 1 | 944.4828  | 7.5  | 363   | 370 | 0  | 66.0  | 35 | R | ANGWTQLR                       | N | -1.0  | 11.04 |                          |
| 6   | Q9HMMW4 Q9HMMW4 | 1 | 1159.5873 | 0.9  | 329   | 338 | 0  | 58.4  | 35 | S | IPSTDVPEFR                     | D | -0.5  | 4.08  |                          |
| 6   | Q9HMMW4 Q9HMMW4 | 1 | 1317.5585 | 5.5  | 507   | 518 | 0  | 39.5  | 32 | S | GEPGYGDENRQP                   | S | -2.3  | 3.82  |                          |
| 6   | Q9HMMW4 Q9HMMW4 | 1 | 1345.6878 | 0.9  | 327   | 338 | 0  | 108.2 | 35 | R | VSIPSTDVPEFR                   | D | -0.1  | 4.08  |                          |
| 6   | Q9HMMW4 Q9HMMW4 | 1 | 1367.6292 | -2.5 | 265   | 275 | 0  | 78.3  | 34 | R | WSQQSVMAFER                    | A | -0.6  | 6.98  |                          |
| 6   | Q9HMMW4 Q9HMMW4 | 1 | 1539.747  | 1.2  | 396   | 409 | 0  | 47.5  | 35 | R | AGVQNTLHPTWGPY                 | A | -0.6  | 7.76  |                          |
| 6   | Q9HMMW4 Q9HMMW4 | 1 | 2071.9673 | -2.6 | 481   | 497 | 0  | 39.3  | 35 | K | LNQETTSWPNLMSNYFK              | T | -0.9  | 6.86  |                          |
| 6   | Q9HMMW4 Q9HMMW4 | 1 | 2250.0706 | 1.5  | 396   | 416 | 0  | 84.5  | 36 | R | AGVQNTLHPTWGPYAPENPTT          | F | -0.8  | 5.12  |                          |
| 6   | Q9HMMW4 Q9HMMW4 | 1 | 2484.171  | -5.4 | 396   | 418 | 0  | 58.7  | 35 | R | AGVQNTLHPTWGPYAPENPTTFS        | G | -0.7  | 5.12  |                          |
| 6   | Q9HMMW4 Q9HMMW4 | 1 | 3212.5163 | -2.0 | 396   | 425 | 0  | 64.3  | 36 | R | AGVQNTLHPTWGPYAPENPTTFSGSLDEAR | R | -0.8  | 4.42  |                          |
| 7   | Q9HRR3 Q9HRR3   | 1 | 1119.5237 | 0.2  | 41    | 48  | 0  | 61.3  | 35 | R | LTYEYFER                       | S | -1.0  | 4.26  |                          |
| 7   | Q9HRR3 Q9HRR3   | 1 | 1287.5917 | 1.4  | 237   | 246 | 0  | 48.2  | 34 | R | EGYMYDLNKR                     | Y | -1.6  | 6.88  |                          |
| 7   | Q9HRR3 Q9HRR3   | 1 | 1414.6729 | -1.5 | 18    | 29  | 0  | 88.5  | 35 | G | IVSPDDETPTWR                   | E | -1.1  | 3.7   |                          |
| 7   | Q9HRR3 Q9HRR3   | 1 | 1522.8719 | 1.3  | 130   | 144 | 0  | 118.7 | 30 | K | LSALNPELAILGGQK                | L | 0.4   | 6.94  |                          |
| 7   | Q9HRR3 Q9HRR3   | 1 | 1629.7635 | 1.1  | 15    | 29  | 0  | 102.4 | 35 | D | GTGIVSPDDETPTWR                | E | -0.9  | 3.7   |                          |
| 7   | Q9HRR3 Q9HRR3   | 1 | 1744.7904 | -3.6 | 14    | 29  | 0  | 120.5 | 33 | T | DGTGIVSPDDETPTWR               | E | -1.1  | 3.5   |                          |
| 7   | Q9HRR3 Q9HRR3   | 1 | 1845.8381 | 4.7  | 13    | 29  | 0  | 54.5  | 34 | R | TDGTGIVSPDDETPTWR              | E | -1.1  | 3.5   |                          |
| 7   | Q9HRR3 Q9HRR3   | 1 | 1914.9072 | -0.1 | 15    | 31  | 0  | 67.4  | 35 | D | GTGIVSPDDETPTWRER              | K | -1.3  | 4.06  |                          |
| 8   | Q9HSA8 Q9HSA8   | 1 | 1140.6655 | -3.2 | 72    | 81  | 0  | 31.6  | 31 | G | INVIPPFVSR                     | T | 0.8   | 11.04 |                          |
| 8   | Q9HSA8 Q9HSA8   | 1 | 1165.5768 | -0.3 | 56    | 65  | 0  | 45.2  | 34 | K | QALTVFGEYR                     | G | -0.1  | 6.88  | Gln->pyro-Glu (N-term Q) |
| 8   | Q9HSA8 Q9HSA8   | 1 | 1182.6033 | -3.0 | 56    | 65  | 0  | 84.7  | 34 | K | QALTVFGEYR                     | G | -0.1  | 6.88  |                          |
| 8   | Q9HSA8 Q9HSA8   | 1 | 1222.5983 | 3.1  | 56    | 66  | 0  | 59.0  | 34 | K | QALTVFGEYRG                    | L | -0.2  | 6.88  | Gln->pyro-Glu (N-term Q) |
| 8   | Q9HSA8 Q9HSA8   | 1 | 1239.6248 | 0.0  | 56    | 66  | 0  | 70.3  | 34 | K | QALTVFGEYRG                    | L | -0.2  | 6.88  |                          |
| 8   | Q9HSA8 Q9HSA8   | 1 | 1423.7823 | 0.2  | 69    | 81  | 0  | 54.2  | 32 | L | EPGINVIPPVSR                   | T | 0.2   | 6.98  |                          |
| 8   | Q9HSA8 Q9HSA8   | 1 | 1518.7678 | -5.7 | 103   | 116 | 0  | 94.5  | 35 | R | DNSPVTADAVVYIR                 | V | 0.1   | 3.88  |                          |
| 8   | Q9HSA8 Q9HSA8   | 1 | 1649.9505 | 1.9  | 67    | 81  | 0  | 71.8  | 29 | G | LLEPGINVIPPVSR                 | T | 0.7   | 6.98  |                          |
| 8   | Q9HSA8 Q9HSA8   | 1 | 1706.9719 | 1.5  | 66    | 81  | 0  | 124.7 | 30 | R | GLLEPGINVIPPVSR                | T | 0.6   | 6.98  |                          |
| 9   | Q48302 Q48302   | 1 | 1104.5927 | 4.0  | 34    | 44  | 0  | 51.0  | 33 | G | LAALAAGYAER                    | G | 0.6   | 6.88  |                          |
| 9   | Q48302 Q48302   | 1 | 1315.6442 | -3.0 | 13    | 25  | 0  | 72.7  | 35 | L | AETGSNMPAITPK                  | A | -0.5  | 6.94  |                          |
| 9   | Q48302 Q48302   | 1 | 1331.7197 | 2.0  | 31    | 44  | 0  | 95.2  | 33 | L | AVGLAALAAGYAER                 | G | 0.9   | 6.88  |                          |
| 9   | Q48302 Q48302   | 1 | 1541.8123 | -2.9 | 11    | 25  | 0  | 90.7  | 35 | T | ILAETGSNMPAITPK                | A | 0.1   | 6.94  |                          |

| hit | accession     | z | mass      | ppm  | start | end | mc | score | id | - | sequence                 | + | gravy | pl    | modification |
|-----|---------------|---|-----------|------|-------|-----|----|-------|----|---|--------------------------|---|-------|-------|--------------|
| 9   | Q48302 Q48302 | 1 | 1728.9522 | 2.7  | 26    | 44  | 0  | 175.6 | 32 | K | AAAALAVGLAALAAGYAER      | G | 1.2   | 6.88  |              |
| 9   | Q48302 Q48302 | 1 | 1729.892  | 0.9  | 9     | 25  | 0  | 97.7  | 35 | L | STILAETGSNMPAITPK        | A | 0.0   | 6.94  |              |
| 10  | Q9HMQ9 Q9HMQ9 | 1 | 1138.5043 | -3.9 | 208   | 217 | 0  | 83.5  | 32 | R | SGGFVESVDR               | A | -0.8  | 4.08  |              |
| 10  | Q9HMQ9 Q9HMQ9 | 1 | 1210.5618 | 4.5  | 70    | 80  | 0  | 56.3  | 34 | K | AAFDAEPTSFR              | S | -0.3  | 4.08  |              |
| 10  | Q9HMQ9 Q9HMQ9 | 1 | 1537.7083 | -1.4 | 5     | 17  | 0  | 128.5 | 34 | F | EVPDVLDSQYSMR            | Q | -0.7  | 3.7   |              |
| 10  | Q9HMQ9 Q9HMQ9 | 1 | 1684.7767 | 0.8  | 4     | 17  | 0  | 108.9 | 34 | W | FEVPDVLDSQYSMR           | Q | -0.4  | 3.7   |              |
| 10  | Q9HMQ9 Q9HMQ9 | 1 | 1870.856  | 8.1  | 3     | 17  | 0  | 91.1  | 34 | S | WFEVPDVLDSQYSMR          | Q | -0.5  | 3.7   |              |
| 10  | Q9HMQ9 Q9HMQ9 | 1 | 1957.888  | 0.7  | 2     | 17  | 0  | 131.4 | 34 | M | SWFEVPDVLDSQYSMR         | Q | -0.5  | 3.7   |              |
| 11  | Q9HHP3 Q9HHP3 | 1 | 1761.905  | -0.3 | 161   | 178 | 0  | 118.3 | 35 | R | ANTGSPFLGNAPVFSVGR       | I | 0.2   | 10.1  |              |
| 11  | Q9HHP3 Q9HHP3 | 1 | 1811.8479 | 0.9  | 199   | 214 | 0  | 150.5 | 35 | R | WTFSEFDTGPNVSLGR         | D | -0.5  | 4.08  |              |
| 11  | Q9HHP3 Q9HHP3 | 1 | 2026.9848 | 3.4  | 179   | 197 | 0  | 127.8 | 36 | K | ILSWDSSSVVAYDATTGQK      | R | -0.1  | 3.88  |              |
| 11  | Q9HHP3 Q9HHP3 | 1 | 2262.0077 | 0.5  | 100   | 119 | 0  | 166.7 | 33 | A | LTPDEFGGSYTSFDINENTR     | S | -1.0  | 3.58  |              |
| 12  | Q9HMX1 Q9HMX1 | 1 | 934.4509  | 3.2  | 18    | 25  | 0  | 34.6  | 34 | R | STDGLWTR                 | I | -1.0  | 6.78  |              |
| 12  | Q9HMX1 Q9HMX1 | 1 | 1163.5757 | -0.7 | 409   | 418 | 0  | 76.7  | 35 | S | FGQQPTVTMR               | K | -0.6  | 11.04 |              |
| 12  | Q9HMX1 Q9HMX1 | 1 | 1272.7038 | -1.3 | 101   | 112 | 0  | 62.1  | 33 | R | STAQSLPTLLSR             | D | 0.0   | 11.04 |              |
| 12  | Q9HMX1 Q9HMX1 | 1 | 1274.5602 | 1.9  | 269   | 279 | 0  | 92.2  | 33 | N | VGVMTYDDYGR              | F | -0.5  | 3.88  |              |
| 12  | Q9HMX1 Q9HMX1 | 1 | 1583.7943 | -1.0 | 389   | 402 | 0  | 51.6  | 35 | R | SLRGPALQVAEEEW           | V | -0.5  | 3.96  |              |
| 12  | Q9HMX1 Q9HMX1 | 1 | 1673.8009 | -1.7 | 113   | 127 | 0  | 84.0  | 35 | R | DVIPNQGYNDPSTVR          | S | -1.0  | 3.88  |              |
| 12  | Q9HMX1 Q9HMX1 | 1 | 1711.8417 | 5.2  | 392   | 407 | 0  | 83.7  | 35 | R | GPALQVAEEEWVDAAK         | S | -0.3  | 3.68  |              |
| 13  | Q9HMI3 Q9HMI3 | 1 | 1258.7397 | -0.3 | 189   | 200 | 0  | 70.0  | 28 | R | NLAIFAAALSR              | D | 1.5   | 11.04 |              |
| 13  | Q9HMI3 Q9HMI3 | 1 | 1613.7573 | -1.6 | 210   | 225 | 0  | 109.2 | 34 | D | AQPELGTDPVGTGPFE         | F | -0.6  | 2.94  |              |
| 13  | Q9HMI3 Q9HMI3 | 1 | 1769.7421 | -2.5 | 139   | 152 | 0  | 119.1 | 29 | R | FIDDEYDYLLGSDR           | S | -1.1  | 3.36  |              |
| 13  | Q9HMI3 Q9HMI3 | 1 | 1925.8432 | 5.6  | 138   | 152 | 0  | 34.1  | 33 | R | RFIDDEYDYLLGSDR          | S | -1.4  | 3.76  |              |
| 13  | Q9HMI3 Q9HMI3 | 1 | 2143.0626 | 3.8  | 238   | 257 | 0  | 80.6  | 36 | R | LTAFFDDYWGGAAPSVAVIFK    | T | 0.5   | 3.88  |              |
| 14  | Q9HRQ9 Q9HRQ9 | 1 | 1835.9126 | 2.0  | 164   | 182 | 0  | 154.6 | 35 | K | VIVNENGQAPSGGGPVER       | S | -0.5  | 4.26  |              |
| 14  | Q9HRQ9 Q9HRQ9 | 1 | 2021.029  | -1.0 | 162   | 182 | 0  | 143.6 | 35 | K | GKIVNENGQAPSGGGPVER      | S | -0.6  | 7.1   |              |
| 14  | Q9HRQ9 Q9HRQ9 | 1 | 2445.1812 | 9.0  | 80    | 102 | 0  | 153.1 | 36 | K | VGPNNQNVFDPAEVYVSPGDTVK  | W | -0.5  | 3.7   |              |
| 15  | Q9HMK0 Q9HMK0 | 1 | 1676.7318 | 2.6  | 177   | 190 | 0  | 132.9 | 33 | D | YASDVEAQEYFAER           | M | -0.9  | 3.68  |              |
| 15  | Q9HMK0 Q9HMK0 | 1 | 1791.7587 | 3.1  | 176   | 190 | 0  | 33.1  | 31 | E | DYASDVEAQEYFAER          | M | -1.1  | 3.5   |              |
| 15  | Q9HMK0 Q9HMK0 | 1 | 2374.9826 | 9.3  | 171   | 190 | 0  | 50.2  | 30 | L | TTDHEDYASDVEAQEYFAER     | M | -1.4  | 3.68  |              |
| 15  | Q9HMK0 Q9HMK0 | 1 | 2488.0666 | 8.2  | 170   | 190 | 0  | 161.8 | 32 | E | LTTDHEDYASDVEAQEYFAER    | M | -1.2  | 3.68  |              |
| 16  | Q9HM69 CSG    | 1 | 1029.5455 | 2.5  | 603   | 611 | 0  | 46.9  | 35 | D | IDISELRQG                | S | -0.4  | 4.08  |              |
| 16  | Q9HM69 CSG    | 1 | 1144.5724 | 5.7  | 602   | 611 | 0  | 47.3  | 35 | E | DIDISELRQG               | S | -0.7  | 3.7   |              |
| 16  | Q9HM69 CSG    | 1 | 1607.7315 | -2.8 | 598   | 610 | 0  | 70.6  | 34 | T | FDEEDIDISELRQ            | G | -1.1  | 3.38  |              |
| 16  | Q9HM69 CSG    | 1 | 1664.7529 | 1.4  | 598   | 611 | 0  | 107.5 | 34 | T | FDEEDIDISELRQG           | S | -1.0  | 3.38  |              |
| 16  | Q9HM69 CSG    | 1 | 1898.8568 | 7.4  | 101   | 118 | 0  | 44.2  | 34 | G | GSDEGVPLQMPIPEDQST       | G | -0.8  | 2.84  |              |
| 17  | Q9HRS0 Q9HRS0 | 1 | 1608.7606 | 0.8  | 97    | 111 | 0  | 60.2  | 35 | K | VGPNGSNVFKPAEMY          | V | -0.4  | 6.86  |              |
| 17  | Q9HRS0 Q9HRS0 | 1 | 1818.9    | -0.2 | 178   | 194 | 0  | 104.8 | 36 | K | GTIIVTDSPPENKGYQT        | I | -0.8  | 4.08  |              |
| 17  | Q9HRS0 Q9HRS0 | 1 | 2529.2962 | 3.1  | 178   | 201 | 0  | 117.6 | 36 | K | GTIIVTDSPPENKGYQTIVPDSAK | T | -0.5  | 4.3   |              |
| 18  | Q9HMZ3 Q9HMZ3 | 1 | 1081.4828 | -0.1 | 552   | 560 | 0  | 59.6  | 32 | R | YNGEFEAPR                | E | -1.5  | 4.26  |              |

| hit | accession     | z | mass      | ppm  | start | end | mc | score | id | - | sequence                 | + | gravy | pl    | modification             |
|-----|---------------|---|-----------|------|-------|-----|----|-------|----|---|--------------------------|---|-------|-------|--------------------------|
| 18  | Q9HMZ3 Q9HMZ3 | 1 | 1188.5809 | 1.6  | 565   | 575 | 0  | 35.8  | 35 | R | ATGVTLDMPR               | N | -0.3  | 4.08  |                          |
| 18  | Q9HMZ3 Q9HMZ3 | 1 | 1364.6394 | -5.4 | 371   | 382 | 0  | 78.1  | 35 | K | NVEDAVMNAFQK             | G | -0.4  | 4.08  |                          |
| 18  | Q9HMZ3 Q9HMZ3 | 1 | 2302.0641 | 13.5 | 245   | 265 | 0  | 112.7 | 36 | R | VPADASPEEIGPSEIEDFSWK    | Q | -0.7  | 3.44  |                          |
| 19  | Q9HSQ7 Q9HSQ7 | 1 | 1085.5216 | -2.6 | 139   | 147 | 0  | 36.7  | 34 | R | LNMDFFATK                | Q | 0.2   | 6.76  |                          |
| 19  | Q9HSQ7 Q9HSQ7 | 1 | 1522.8833 | -9.8 | 177   | 190 | 0  | 37.4  | 30 | R | LSVMVLAIGVYLFV           | V | 2.6   | 5.92  |                          |
| 19  | Q9HSQ7 Q9HSQ7 | 1 | 2154.9553 | 4.5  | 358   | 376 | 0  | 91.7  | 34 | M | NEPSRIEENPDADLVDD        | G | -1.3  | 3.24  |                          |
| 19  | Q9HSQ7 Q9HSQ7 | 1 | 2244.3093 | 3.7  | 52    | 73  | 0  | 113.7 | 27 | R | VLDLAPPVLLGLAIDSVIQGNK   | A | 1.0   | 3.88  |                          |
| 20  | Q9HMG3 Q9HMG3 | 1 | 1563.7205 | -1.7 | 45    | 57  | 0  | 42.1  | 34 | S | TVPETDFPEPYNR            | S | -1.5  | 3.82  |                          |
| 20  | Q9HMG3 Q9HMG3 | 1 | 1650.7526 | 2.5  | 45    | 58  | 0  | 61.0  | 34 | S | TVPETDFPEPYNRS           | I | -1.4  | 3.82  |                          |
| 20  | Q9HMG3 Q9HMG3 | 1 | 1721.7897 | -0.6 | 43    | 57  | 0  | 111.8 | 34 | R | ASTVPETDFPEPYNR          | S | -1.2  | 3.82  |                          |
| 20  | Q9HMG3 Q9HMG3 | 1 | 1808.8217 | 2.2  | 43    | 58  | 0  | 100.7 | 34 | R | ASTVPETDFPEPYNRS         | I | -1.2  | 3.82  |                          |
| 21  | Q9HP76 Q9HP76 | 1 | 968.5807  | 0.2  | 120   | 127 | 0  | 49.2  | 29 | R | WSIPIVVR                 | F | 1.2   | 11.04 |                          |
| 21  | Q9HP76 Q9HP76 | 1 | 1104.7019 | -9.3 | 342   | 351 | 0  | 26.9  | 20 | R | LPPNLALVLR               | V | 1.0   | 11.04 |                          |
| 21  | Q9HP76 Q9HP76 | 1 | 1966.9748 | 3.8  | 389   | 407 | 0  | 83.0  | 35 | R | QFAAGTAEFQAAATSVLR       | V | 0.2   | 4.26  |                          |
| 21  | Q9HP76 Q9HP76 | 1 | 2048.9691 | -3.3 | 60    | 77  | 0  | 63.6  | 35 | R | VIEDELGPVDDVDFAFNR       | E | -0.2  | 3.32  |                          |
| 21  | Q9HP76 Q9HP76 | 1 | 2070.0058 | -0.9 | 128   | 146 | 0  | 77.2  | 36 | R | FVGQQAQFSLNLADEFK        | T | 0.0   | 3.82  |                          |
| 22  | P33518 COX1   | 1 | 1506.7314 | 5.0  | 33    | 47  | 0  | 57.8  | 35 | R | SYTPLSDVGGGLGER          | T | -0.4  | 4.08  |                          |
| 22  | P33518 COX1   | 1 | 2872.2253 | 6.8  | 535   | 557 | 0  | 153.7 | 32 | R | VDSTDPWDLLEETDQFTNDWAWFR | A | -1.2  | 3.22  |                          |
| 23  | Q9HRM1 Q9HRM1 | 1 | 1292.5997 | 6.0  | 41    | 52  | 0  | 74.5  | 34 | T | YESAEVPTGNAR             | L | -1.0  | 4.26  |                          |
| 23  | Q9HRM1 Q9HRM1 | 1 | 1464.6845 | 0.6  | 39    | 52  | 0  | 98.9  | 35 | R | ATYESAEVPTGNAR           | L | -0.8  | 4.26  |                          |
| 24  | Q9HQP2 Q9HQP2 | 1 | 1006.5236 | 9.6  | 382   | 389 | 0  | 39.6  | 33 | G | EAQPFLFR                 | T | -0.2  | 6.98  |                          |
| 24  | Q9HQP2 Q9HQP2 | 1 | 1176.6291 | 3.8  | 380   | 389 | 0  | 68.4  | 33 | T | IGEAQPFLFR               | T | 0.2   | 6.98  |                          |
| 24  | Q9HQP2 Q9HQP2 | 1 | 1277.6768 | 1.4  | 379   | 389 | 0  | 60.0  | 33 | R | TIGEAQPFLFR              | T | 0.1   | 6.98  |                          |
| 24  | Q9HQP2 Q9HQP2 | 1 | 1353.6718 | 0.8  | 741   | 752 | 0  | 65.3  | 34 | K | FSAPVVFYDGPR             | D | 0.2   | 6.7   |                          |
| 25  | Q9HPB1 SECY   | 1 | 1474.7351 | 2.6  | 399   | 411 | 0  | 121.4 | 35 | R | QIQNSGMQIPGFR            | K | -0.6  | 11.04 |                          |
| 25  | Q9HPB1 SECY   | 1 | 1486.8945 | 2.8  | 287   | 299 | 0  | 58.0  | 25 | K | LIYASVLPMLVR             | A | 1.9   | 9.84  |                          |
| 25  | Q9HPB1 SECY   | 1 | 1585.8035 | 0.7  | 399   | 412 | 0  | 54.9  | 35 | R | QIQNSGMQIPGFRK           | N | -0.9  | 11.48 | Gln->pyro-Glu (N-term Q) |
| 26  | Q9HRL4 Q9HRL4 | 1 | 1611.7199 | -0.5 | 86    | 99  | 0  | 99.7  | 33 | R | NFDDIDVTNATTMR           | W | -0.6  | 3.6   |                          |
| 26  | Q9HRL4 Q9HRL4 | 1 | 1797.7992 | -0.1 | 86    | 100 | 0  | 116.9 | 33 | R | NFDDIDVTNATTMRW          | - | -0.7  | 3.6   |                          |
| 27  | Q9HN94 Q9HN94 | 1 | 1435.7096 | -2.0 | 41    | 53  | 0  | 38.1  | 35 | R | QFAFSPGTSEPIR            | V | -0.4  | 6.98  |                          |
| 27  | Q9HN94 Q9HN94 | 1 | 2175.9233 | 5.0  | 22    | 40  | 0  | 159.3 | 31 | R | DPGVYQADDDSYDVYVEAR      | Q | -1.0  | 3.26  |                          |
| 28  | Q9HRU5 Q9HRU5 | 1 | 941.4355  | -0.2 | 38    | 46  | 0  | 39.9  | 32 | R | LSWHAGGQS                | G | -0.5  | 7.84  |                          |
| 28  | Q9HRU5 Q9HRU5 | 1 | 1522.6841 | -2.2 | 38    | 51  | 0  | 95.8  | 33 | R | LSWHAGGQSGTYYP           | L | -0.7  | 7.7   |                          |
| 28  | Q9HRU5 Q9HRU5 | 1 | 1722.8002 | -2.6 | 38    | 53  | 0  | 101.2 | 34 | R | LSWHAGGQSGTYYP           | N | -0.4  | 7.7   |                          |
| 29  | Q9HRL3 Q9HRL3 | 1 | 825.5072  | 9.3  | 624   | 631 | 0  | 35.1  | 28 | K | GVTLP                    | G | 0.8   | 11.04 |                          |
| 29  | Q9HRL3 Q9HRL3 | 1 | 1832.8369 | 7.9  | 610   | 623 | 0  | 45.9  | 35 | Y | NNYYQDEYQVWLAK           | G | -1.4  | 4.08  |                          |
| 29  | Q9HRL3 Q9HRL3 | 1 | 2323.1161 | 5.7  | 606   | 623 | 0  | 131.9 | 36 | R | TLLYNNYYQDEYQVWLAK       | G | -0.8  | 4.08  |                          |
| 30  | Q9HSQ2 HTPX   | 1 | 1401.7187 | -0.1 | 89    | 102 | 0  | 72.6  | 35 | K | VANMGVPNAFAVGR           | K | 0.6   | 11.04 |                          |
| 30  | Q9HSQ2 HTPX   | 1 | 1422.5721 | 1.3  | 57    | 68  | 0  | 55.0  | 29 | V | GAEDMDEQEFP              | I | -1.8  | 3.5   |                          |
| 30  | Q9HSQ2 HTPX   | 1 | 1608.6726 | -5.7 | 55    | 68  | 0  | 100.0 | 30 | R | SVGAEEDMDEQEFP           | I | -1.3  | 3.5   |                          |

| hit | accession     | z | mass      | ppm  | start | end | mc | score | id | - | sequence                            | + | gravy | pl    | modification             |
|-----|---------------|---|-----------|------|-------|-----|----|-------|----|---|-------------------------------------|---|-------|-------|--------------------------|
| 31  | Q9HRR1 Q9HRR1 | 1 | 1136.5614 | -6.2 | 267   | 276 | 0  | 43.1  | 34 | K | SFVAFARPEN                          | - | 0.0   | 6.98  |                          |
| 31  | Q9HRR1 Q9HRR1 | 1 | 1596.8835 | 1.9  | 180   | 193 | 0  | 105.2 | 32 | R | SQNTDNTIPLIIR                       | S | 0.0   | 6.78  |                          |
| 31  | Q9HRR1 Q9HRR1 | 1 | 3091.5058 | 26.2 | 17    | 51  | 0  | 88.7  | 36 | K | GVVGSAAAGAGTAGTAVLESVTNPTGSGGGQNTNY | F | 0.3   | 3.3   |                          |
| 32  | Q9HRF2 Q9HRF2 | 1 | 1169.6404 | -2.6 | 267   | 278 | 0  | 59.8  | 33 | R | IGLPASIEGTGR                        | A | 0.2   | 6.98  |                          |
| 32  | Q9HRF2 Q9HRF2 | 1 | 1875.94   | 1.4  | 246   | 262 | 0  | 131.8 | 36 | R | GVEINAADMPLDLSYLR                   | R | 0.2   | 3.7   |                          |
| 33  | Q9HRJ0 Q9HRJ0 | 1 | 1391.6681 | 1.3  | 26    | 38  | 0  | 45.0  | 35 | R | ADEQPPDPLPGTR                       | T | -1.6  | 3.7   |                          |
| 33  | Q9HRJ0 Q9HRJ0 | 1 | 1529.8566 | -1.4 | 173   | 187 | 0  | 127.8 | 32 | R | TPVVGTAVFNALVSR                     | R | 1.0   | 11.04 |                          |
| 34  | Q9HS12 Q9HS12 | 1 | 1694.9641 | -5.5 | 486   | 502 | 0  | 76.0  | 31 | R | AIGETAPLIMIGAPTIK                   | F | 1.0   | 6.94  |                          |
| 35  | Q9HHR4 Q9HHR4 | 1 | 1001.5142 | 4.5  | 331   | 339 | 0  | 36.8  | 35 | K | SETATQIPR                           | T | -1.0  | 6.98  |                          |
| 35  | Q9HHR4 Q9HHR4 | 1 | 1047.5713 | 2.6  | 450   | 459 | 0  | 68.1  | 32 | K | TGYLLGATPR                          | K | 0.0   | 9.84  |                          |
| 35  | Q9HHR4 Q9HHR4 | 1 | 1381.6838 | 3.9  | 211   | 223 | 0  | 40.9  | 34 | K | TTLETAFSAGQTR                       | G | -0.4  | 6.98  |                          |
| 35  | Q9HHR4 Q9HHR4 | 1 | 1728.9258 | 17.9 | 433   | 450 | 0  | 32.1  | 32 | S | VVAIAAAVAGDTSQDLKT                  | G | 0.7   | 3.88  |                          |
| 36  | Q9HS72 SECE   | 1 | 1393.6911 | -2.2 | 1     | 12  | 0  | 106.8 | 35 | - | MDVPLELSAYTR                        | V | 0.0   | 4.08  |                          |
| 36  | Q9HS72 SECE   | 1 | 1409.6861 | -3.6 | 1     | 12  | 0  | 75.9  | 34 | - | MDVPLELSAYTR                        | V | 0.0   | 4.08  | Oxidation (M)            |
| 36  | Q9HS72 SECE   | 1 | 1692.8359 | 0.9  | 16    | 30  | 0  | 101.4 | 35 | R | LASTPSWEEFSQIAK                     | I | -0.4  | 4.26  |                          |
| 37  | Q9HS26 Q9HS26 | 1 | 1017.5243 | -3.9 | 309   | 317 | 0  | 56.8  | 35 | R | ASDSLWIAR                           | E | 0.2   | 6.78  |                          |
| 37  | Q9HS26 Q9HS26 | 1 | 1661.8988 | 2.2  | 375   | 389 | 0  | 124.2 | 33 | R | AIQDFLLESVATTVR                     | R | 0.6   | 4.08  |                          |
| 38  | Q9HNN6 Q9HNN6 | 1 | 1107.5423 | -6.8 | 48    | 56  | 0  | 47.7  | 35 | R | FLDWMATPK                           | R | 0.0   | 6.76  |                          |
| 38  | Q9HNN6 Q9HNN6 | 1 | 1525.8141 | -3.9 | 25    | 39  | 0  | 107.1 | 34 | R | GLLPSFVHTSGPITT                     | L | 0.5   | 7.84  |                          |
| 39  | Q9HQV3 Q9HQV3 | 1 | 1134.6033 | -1.6 | 19    | 28  | 0  | 46.9  | 33 | H | ALDVFSQLSR                          | S | 0.3   | 6.78  |                          |
| 39  | Q9HQV3 Q9HQV3 | 1 | 1453.7314 | 3.9  | 16    | 28  | 0  | 112.9 | 34 | S | QAHALDVFSQLSR                       | S | -0.1  | 7.84  | Gln->pyro-Glu (N-term Q) |
| 40  | Q9HQF4 Q9HQF4 | 1 | 1437.71   | 3.6  | 102   | 115 | 0  | 49.9  | 35 | A | TEDGDPSVPGPIVR                      | T | -0.7  | 3.7   |                          |
| 40  | Q9HQF4 Q9HQF4 | 1 | 1538.7577 | -2.6 | 102   | 116 | 0  | 79.0  | 35 | A | TEDGDPSVPGPIVRT                     | E | -0.7  | 3.7   |                          |
| 41  | Q9HQ04 Q9HQ04 | 1 | 1346.7195 | 1.4  | 222   | 233 | 0  | 53.7  | 34 | E | GVVQEVDVVFVTR                       | I | 0.6   | 4.08  |                          |
| 41  | Q9HQ04 Q9HQ04 | 1 | 1459.7419 | -6.2 | 207   | 220 | 0  | 50.6  | 35 | R | QPYGIGDQVAIGSR                      | E | -0.4  | 6.7   |                          |
| 41  | Q9HQ04 Q9HQ04 | 1 | 1475.762  | 1.2  | 221   | 233 | 0  | 55.3  | 35 | R | EGVVQEVDVVFVTR                      | I | 0.3   | 3.82  |                          |
| 42  | P25964 BACS1  | 1 | 1780.0135 | -6.3 | 149   | 164 | 0  | 48.3  | 31 | R | VVPDVPEQIGLFNLLK                    | N | 0.6   | 4.08  |                          |
| 43  | Q9HQA6 Q9HQA6 | 1 | 1176.5411 | 1.8  | 96    | 105 | 0  | 77.9  | 35 | D | FEDATDINPR                          | K | -1.2  | 3.7   |                          |
| 43  | Q9HQA6 Q9HQA6 | 1 | 1291.5681 | 5.1  | 95    | 105 | 0  | 63.1  | 33 | D | DFEDATDINPR                         | K | -1.4  | 3.5   |                          |
| 44  | Q9HP89 Q9HP89 | 1 | 1329.7405 | -3.2 | 225   | 237 | 0  | 71.3  | 32 | R | LSPYLAAGNIGVR                       | E | 0.6   | 9.84  |                          |
| 44  | Q9HP89 Q9HP89 | 1 | 1964.8864 | -4.0 | 238   | 256 | 0  | 36.0  | 33 | R | EVWAAVADAYDDATGNAAR                 | N | -0.2  | 3.5   |                          |
| 45  | O59634 O59634 | 1 | 1647.7893 | 0.3  | 26    | 40  | 0  | 39.3  | 35 | L | EYTPTGESIPAAAWR                     | R | -0.6  | 4.26  |                          |
| 45  | O59634 O59634 | 1 | 2024.9843 | 4.7  | 23    | 40  | 0  | 42.3  | 36 | K | TYLEYTPTGESIPAAAWR                  | R | -0.4  | 4.26  |                          |
| 46  | Q9HS51 Q9HS51 | 1 | 1767.7336 | -0.2 | 78    | 93  | 0  | 36.8  | 29 | L | GNDDADEIGLNPHDWT                    | V | -1.4  | 3.36  |                          |
| 46  | Q9HS51 Q9HS51 | 1 | 1880.8177 | -1.9 | 77    | 93  | 0  | 114.6 | 32 | T | LGNDDADEIGLNPHDWT                   | V | -1.0  | 3.36  |                          |
| 47  | Q9HRT0 Q9HRT0 | 1 | 1146.5669 | 1.8  | 505   | 514 | 0  | 44.7  | 35 | R | VPDVAVYNR                           | V | -0.4  | 3.88  |                          |
| 47  | Q9HRT0 Q9HRT0 | 1 | 1271.6721 | -5.0 | 559   | 570 | 0  | 76.5  | 35 | R | LLGDTDSPVSLR                        | A | 0.0   | 3.88  |                          |
| 48  | Q9HR22 Q9HR22 | 1 | 1270.6823 | -3.5 | 234   | 244 | 0  | 84.6  | 35 | R | IPNVPFGFQPR                         | D | -0.2  | 11.04 |                          |
| 49  | Q9HR99 Q9HR99 | 1 | 1494.7025 | -1.1 | 99    | 113 | 0  | 104.3 | 35 | K | ISIPDGASGFGTMDK                     | D | 0.0   | 3.88  |                          |
| 49  | Q9HR99 Q9HR99 | 1 | 1510.6974 | -5.7 | 99    | 113 | 0  | 34.1  | 34 | K | ISIPDGASGFGTMDK                     | D | 0.0   | 3.88  | Oxidation (M)            |

| hit | accession     | z | mass      | ppm   | start | end | mc | score | id | - | sequence            | + | gravy | pl    | modification             |
|-----|---------------|---|-----------|-------|-------|-----|----|-------|----|---|---------------------|---|-------|-------|--------------------------|
| 50  | Q9HNR0 Q9HNR0 | 1 | 1259.6186 | -3.8  | 340   | 350 | 0  | 61.6  | 35 | N | SYVAPSFAQK          | Y | -0.2  | 9.52  |                          |
| 51  | Q9HSC3 LONH   | 1 | 728.4181  | 11.5  | 430   | 436 | 0  | 39.6  | 35 | R | DLGGLVR             | V | 0.4   | 6.78  |                          |
| 51  | Q9HSC3 LONH   | 1 | 1638.8002 | -1.5  | 464   | 476 | 0  | 53.9  | 35 | R | SIEQQFVDNYIQR       | R | -0.9  | 4.08  |                          |
| 52  | Q9HNE6 Q9HNE6 | 1 | 981.5607  | -0.4  | 213   | 222 | 0  | 47.6  | 29 | R | AGDILGPLAR          | F | 0.5   | 6.78  |                          |
| 52  | Q9HNE6 Q9HNE6 | 1 | 1594.8905 | 0.6   | 92    | 106 | 0  | 71.4  | 31 | R | GGLPMLVPLLGFPER     | Y | 0.7   | 6.98  |                          |
| 54  | Q9HPU7 Q9HPU7 | 1 | 2006.0837 | -1.2  | 17    | 35  | 0  | 42.3  | 33 | F | VPSWLVPAAAGDLPLTVSR | L | 0.4   | 4.08  |                          |
| 55  | Q9HRN3 Q9HRN3 | 1 | 1578.7638 | 2.4   | 83    | 98  | 0  | 90.9  | 35 | R | VSSPGGAVSGSEVQYR    | A | -0.3  | 6.88  |                          |
| 56  | Q9HMU9 Q9HMU9 | 1 | 773.4184  | 0.0   | 2     | 8   | 0  | 53.1  | 35 | M | SWAAIAR             | K | 0.5   | 11.04 |                          |
| 57  | Q9HN07 Q9HN07 | 1 | 1281.6353 | -3.2  | 599   | 609 | 0  | 76.0  | 34 | R | TPANTAELFYR         | L | -0.5  | 6.88  |                          |
| 58  | Q9HN92 Q9HN92 | 1 | 1428.834  | -4.4  | 15    | 28  | 0  | 124.1 | 30 | L | LSLVPVALYAAGQK      | A | 1.0   | 9.72  |                          |
| 59  | Q9HRL8 Q9HRL8 | 1 | 877.5021  | 0.6   | 118   | 125 | 0  | 32.5  | 29 | K | YSLLGGLR            | A | 0.5   | 9.84  |                          |
| 60  | Q9HRJ9 Q9HRJ9 | 1 | 1439.6892 | -1.7  | 27    | 39  | 0  | 63.7  | 34 | A | SSGYQSATEELIR       | N | -0.7  | 4.26  |                          |
| 61  | Q9HHJ8 Q9HHJ8 | 1 | 927.5138  | 26.3  | 601   | 609 | 0  | 39.6  | 33 | Q | AGNVAVERL           | V | 0.4   | 6.98  |                          |
| 62  | Q9HR16 Q9HR16 | 1 | 1222.671  | -5.2  | 78    | 88  | 0  | 56.9  | 32 | R | AVTLPTFFATR         | L | 0.8   | 11.04 |                          |
| 63  | Q9HT01 Q9HT01 | 1 | 1299.5996 | 0.4   | 612   | 622 | 0  | 45.6  | 33 | R | LYNWFVSGNSR         | S | -0.9  | 9.84  |                          |
| 64  | Q9HMX0 Q9HMX0 | 1 | 1013.5869 | 3.2   | 52    | 60  | 0  | 34.9  | 32 | R | NLEISLGIR           | Y | 0.4   | 6.98  |                          |
| 64  | Q9HMX0 Q9HMX0 | 1 | 1448.814  | -2.2  | 305   | 317 | 0  | 42.3  | 31 | K | VFSINGIGNLFIR       | A | 1.1   | 11.04 |                          |
| 68  | Q9HND8 VATI   | 1 | 1016.4716 | -2.5  | 709   | 716 | 0  | 51.8  | 34 | K | YNPFYTR             | N | -1.3  | 9.58  |                          |
| 69  | Q9HQU7 Q9HQU7 | 1 | 1514.7518 | -0.3  | 184   | 196 | 0  | 47.6  | 35 | R | AEGWEPFVSLQPR       | Y | -0.6  | 4.26  |                          |
| 71  | Q9HPD4 RL3    | 1 | 1209.6254 | -1.2  | 234   | 244 | 0  | 104.0 | 33 | R | IGNLGPWNPSR         | V | -0.8  | 11.04 |                          |
| 72  | Q9HRL1 Q9HRL1 | 1 | 950.5338  | -0.8  | 159   | 167 | 0  | 69.5  | 30 | K | AAGFAVLFRR          | V | 1.6   | 11.04 |                          |
| 74  | Q9HSF7 TF2B7  | 1 | 1304.6724 | 0.6   | 136   | 146 | 0  | 78.7  | 35 | R | NLQFALSEIDR         | M | -0.2  | 4.08  |                          |
| 75  | Q9HT00 GLMS   | 1 | 773.4032  | 19.7  | 423   | 430 | 0  | 41.4  | 35 | S | TGDAALR             | D | 0.0   | 6.78  |                          |
| 78  | Q9HQ63 DHSD   | 1 | 776.4181  | 8.4   | 9     | 15  | 0  | 38.3  | 33 | G | LVADFGR             | W | 0.6   | 6.78  |                          |
| 81  | Q9HN25 Q9HN25 | 1 | 1841.9312 | -2.3  | 129   | 144 | 0  | 64.6  | 36 | K | LNANFIEPGSLSYVYR    | N | 0.0   | 6.82  |                          |
| 87  | Q9HSL5 Q9HSL5 | 1 | 1148.5251 | 5.1   | 49    | 58  | 0  | 41.7  | 34 | K | AGGSYYVNR           | A | -0.8  | 9.44  |                          |
| 88  | Q9HNB2 Q9HNB2 | 1 | 773.4283  | -12.8 | 409   | 417 | 0  | 36.1  | 35 | V | VTTAALAAG           | V | 1.5   | 6.02  |                          |
| 93  | Q9HHS5 Q9HHS5 | 1 | 1571.674  | 0.0   | 75    | 88  | 0  | 80.9  | 31 | R | YAAGDIDDEEFAR       | R | -0.8  | 3.42  |                          |
| 94  | Q9HT02 Q9HT02 | 1 | 965.4389  | 9.9   | 230   | 237 | 0  | 48.0  | 34 | R | EGVNNFMR            | T | -0.8  | 6.98  |                          |
| 105 | Q9HP72 HEM1   | 1 | 773.4395  | -27.4 | 160   | 167 | 0  | 39.4  | 35 | T | SLGTA AVR           | L | 0.7   | 11.04 |                          |
| 107 | Q9HRL9 Q9HRL9 | 1 | 1336.7139 | -6.4  | 344   | 355 | 0  | 36.2  | 33 | R | LGGVVDIPEPR         | A | 0.0   | 4.08  |                          |
| 110 | P00772 ELA1   | 1 | 1695.8257 | -0.1  | 101   | 114 | 0  | 67.3  | 35 | V | QKIVVHPYWNTDDV      | A | -0.6  | 5.1   | Gln->pyro-Glu (N-term Q) |
| 111 | P71416 P71416 | 1 | 865.5749  | 5.9   | 26    | 33  | 0  | 22.6  | 20 | K | AIALPLR             | S | 1.7   | 11.04 |                          |
| 112 | Q9HQW0 Q9HQW0 | 1 | 1017.5455 | -24.7 | 127   | 136 | 0  | 37.6  | 35 | P | SSVISDAALR          | A | 0.6   | 6.78  |                          |
| 113 | Q9HQ64 Q9HQ64 | 1 | 1147.5986 | -2.1  | 10    | 19  | 0  | 43.5  | 34 | R | SGSTWLLQR           | L | -0.5  | 11.04 |                          |
| 114 | Q9HMK7 Q9HMK7 | 1 | 1190.6196 | -1.3  | 197   | 208 | 0  | 36.7  | 34 | R | YGIAWGAVGAAR        | N | 0.7   | 9.84  |                          |
| 117 | Q9HSJ6 Q9HSJ6 | 1 | 950.5226  | 10.9  | 13    | 22  | 0  | 34.6  | 30 | G | FGAAVVFVAV          | L | 2.5   | 6.02  |                          |
| 118 | Q9HP32 PYRG   | 1 | 1190.6329 | -10.6 | 18    | 30  | 0  | 35.9  | 34 | F | VTGGVMSGLGKGI       | T | 0.9   | 10.1  | Oxidation (M)            |
| 125 | Q9HPA6 Q9HPA6 | 1 | 1378.6364 | -0.2  | 165   | 175 | 0  | 61.1  | 34 | K | YQEQAQELQDK         | M | -2.2  | 3.82  |                          |
| 126 | Q9HMK1 Q9HMK1 | 1 | 962.5008  | 1.7   | 352   | 360 | 0  | 34.1  | 34 | R | VFMSAVGPR           | G | 0.8   | 11.04 |                          |



| hit | accession     | z | mass      | ppm   | start | end | mc | score | id | - | sequence             | + | gravy | pl    | modification  |
|-----|---------------|---|-----------|-------|-------|-----|----|-------|----|---|----------------------|---|-------|-------|---------------|
| 128 | Q9HRD0 Q9HRD0 | 1 | 2143.007  | 0.4   | 345   | 364 | 0  | 51.8  | 35 | E | EQPEDIPSAGDLDFPGTTVR | V | -0.8  | 3.42  |               |
| 129 | Q9HP01 Q9HP01 | 1 | 887.5328  | 25.8  | 79    | 87  | 0  | 40.7  | 25 | F | VTLLLLSVG            | I | 1.9   | 6.02  |               |
| 130 | Q9HRC9 Q9HRC9 | 1 | 1080.4699 | -4.0  | 104   | 111 | 0  | 44.8  | 32 | R | FDPEWMTR             | T | -1.3  | 4.08  |               |
| 132 | Q9HMD1 SECG   | 1 | 1768.7904 | -2.8  | 19    | 33  | 0  | 55.1  | 33 | R | YFSEDSNALQIDPR       | S | -1.1  | 3.5   |               |
| 134 | Q9HRU7 Q9HRU7 | 1 | 986.6277  | 23.3  | 884   | 892 | 0  | 19.7  | 14 | L | VVFAALLVR            | N | 2.5   | 11.04 |               |
| 136 | Q9HQQ5 Q9HQQ5 | 1 | 841.5273  | -22.0 | 174   | 182 | 0  | 34.1  | 31 | G | ATVAVLVGL            | Y | 2.5   | 6.02  |               |
| 139 | Q9HQ03 Q9HQ03 | 1 | 927.5277  | 11.3  | 7     | 15  | 0  | 36.6  | 33 | D | LLADVLDGI            | D | 1.6   | 2.92  |               |
| 150 | P16102 BACH   | 1 | 971.6089  | 10.0  | 118   | 126 | 0  | 26.5  | 22 | P | MILLALGLL            | A | 3.0   | 6.02  | Oxidation (M) |
| 158 | Q9HNT9 Q9HNT9 | 1 | 773.4031  | 19.7  | 3     | 10  | 0  | 41.6  | 35 | I | SDLAAAAR             | S | 0.3   | 6.78  |               |
| 159 | Q9HPX0 Q9HPX0 | 1 | 1835.8618 | 28.4  | 293   | 310 | 0  | 38.5  | 35 | D | RMRGDGMAIAAGGIQTTD   | T | -0.2  | 6.92  | Oxidation (M) |
| 160 | Q9HRZ2 Q9HRZ2 | 1 | 1436.7663 | -3.6  | 184   | 195 | 0  | 44.4  | 33 | K | LANLLFAYELDR         | R | 0.4   | 4.08  |               |
| 163 | Q9HR62 Q9HR62 | 1 | 1118.6448 | 1.3   | 305   | 315 | 0  | 43.4  | 29 | R | APSVVPVSLPR          | S | 0.1   | 11.04 |               |
| 164 | Q9HRY9 Q9HRY9 | 1 | 1728.9444 | 7.2   | 18    | 36  | 0  | 46.5  | 32 | A | VAVLAGGAVIGMTVLGGTQ  | S | 1.5   | 6.02  | Oxidation (M) |
| 169 | Q9HMS1 Q9HMS1 | 1 | 1367.6609 | -7.7  | 45    | 57  | 0  | 48.9  | 34 | K | LLEGGLTFDPSGY        | L | 0.1   | 3     |               |
| 170 | Q9HR07 Q9HR07 | 1 | 1321.8194 | -24.1 | 8     | 20  | 0  | 27.3  | 26 | A | VRSRPLVVAALAA        | A | 1.2   | 12.4  |               |
| 197 | O51960 O51960 | 1 | 1084.5513 | 1.7   | 2     | 10  | 0  | 52.8  | 34 | M | SELPENIQR            | Q | -1.4  | 4.26  |               |
| 199 | Q9HS48 Q9HS48 | 1 | 773.4283  | -3.5  | 68    | 76  | 0  | 35.6  | 35 | A | SATVAVAGV            | A | 1.8   | 6.02  |               |
| 202 | Q9HQW3 Q9HQW3 | 1 | 986.6277  | 23.3  | 124   | 132 | 0  | 19.1  | 14 | L | LAFRIVIVG            | C | 2.3   | 11.04 |               |
| 213 | Q9HS33 Q9HS33 | 1 | 971.6419  | -27.3 | 298   | 306 | 0  | 26.6  | 24 | F | IIAGFIILI            | P | 3.4   | 6.02  |               |
| 220 | Q9HSA0 Q9HSA0 | 1 | 1260.6251 | 5.0   | 39    | 50  | 0  | 36.0  | 35 | A | FEHGLPSGPHLA         | D | -0.2  | 6.02  |               |
| 230 | Q9HN82 ENDA   | 1 | 950.5338  | -0.8  | 68    | 76  | 0  | 31.0  | 30 | E | AGFAARFLV            | Y | 1.6   | 11.04 |               |
| 234 | Q9HN85 Q9HN85 | 1 | 1182.6033 | -3.0  | 179   | 189 | 0  | 43.2  | 34 | G | AGALTSPTFYR          | E | 0.0   | 9.84  |               |
| 285 | Q9HNZ0 NADB   | 1 | 773.4105  | 10.1  | 216   | 224 | 0  | 38.6  | 35 | G | VAMAALAGA            | D | 2.1   | 6.02  |               |
| 301 | Q9HSJ5 Q9HSJ5 | 1 | 1728.9774 | -13.6 | 10    | 28  | 0  | 33.4  | 33 | L | AGAAVAALALASVAVAYLQ  | F | 1.8   | 5.92  |               |
| 339 | Q9HQ52 THYX   | 1 | 2101.999  | 1.9   | 158   | 176 | 0  | 47.5  | 36 | R | AVEDYQELLGLGMPPEDAR  | F | -0.5  | 3.5   |               |
| 344 | Q9HN76 Q9HN76 | 1 | 975.5576  | 4.4   | 83    | 90  | 0  | 38.6  | 29 | R | FTLPMVLR             | A | 1.2   | 11.04 |               |
| 375 | Q48290 FTSZ   | 1 | 1550.8014 | -3.3  | 181   | 194 | 0  | 37.0  | 34 | K | AFSVMQIIAETVK        | G | 0.7   | 4.08  |               |
| 394 | Q9HQQ6 Q9HQQ6 | 1 | 1133.706  | -7.9  | 216   | 225 | 0  | 31.5  | 23 | R | IILTYSLAK            | T | 1.6   | 9.72  |               |
| 395 | Q9HNU0 Q9HNU0 | 1 | 813.4708  | 16.3  | 268   | 275 | 0  | 41.8  | 32 | A | DALVAAVR             | A | 1.2   | 6.78  |               |
| 454 | P17103 Y1111  | 1 | 1024.6029 | -26.4 | 308   | 315 | 0  | 30.0  | 30 | D | REEPLIIR             | R | -0.6  | 7.12  |               |
| 508 | Q9HRM0 Q9HRM0 | 1 | 1309.6918 | -6.3  | 39    | 50  | 0  | 35.2  | 33 | R | EAFGSTPFILTK         | F | 0.3   | 6.94  |               |
| 536 | O51958 O51958 | 1 | 981.5719  | -11.8 | 371   | 378 | 0  | 29.2  | 29 | N | AERLRLQP             | V | -1.0  | 10.88 |               |
| 635 | Q9HSM8 Q9HSM8 | 1 | 981.5859  | -26.1 | 268   | 278 | 0  | 29.1  | 29 | A | AATLLPLAGGV          | G | 1.6   | 6.02  |               |

END OF LIST IX
