# Supplementary material
Source: PubMed Central journal article supplement (PMC2689761)
Supplement: M800223-MCP200_3.pdf [file M800223-MCP200_3.pdf]

**Supplementary Table 2**

(this table contains all original protein data, used to calculate most statistics throughout this study)

| <b>content:</b>                                                                                          | <b>page</b> |
|----------------------------------------------------------------------------------------------------------|-------------|
| <b>I. Corynebacterium glutamicum membrane; elastase digest, nLC-ESI MS/MS, no search specificity</b>     | <b>2</b>    |
| <b>II. Purple membrane; elastase digest, nLC-ESI MS/MS, no search specificity</b>                        | <b>23</b>   |
| <b>III. Corynebacterium glutamicum membrane; elastase digest; nLC-MALDI MS/MS; no search specificity</b> | <b>35</b>   |
| <b>IV. Purple membrane; elastase digest, nLC-MALDI MS/MS; no search specificity</b>                      | <b>44</b>   |
| <b>V. Purple membrane; elastase digest; nLC-MALDI MS/MS; AVLISTG search specificity</b>                  | <b>49</b>   |
| <b>VI. Purple membrane; elastase digest; nLC-MALDI MS/MS; AVLIST search specificity</b>                  | <b>54</b>   |
| <b>VII. Purple membrane; elastase digest; nLC-MALDI MS/MS; AVLI search specificity</b>                   | <b>59</b>   |
| <b>VIII. Purple membrane; trypsin digest; nLC-MALDI MS/MS; KR search specificity</b>                     | <b>63</b>   |
| <b>IX. Purple membrane; trypsin digest; nLC-MALDI MS/MS; no search specificity</b>                       | <b>68</b>   |

**descriptions:**

|                    |                         |
|--------------------|-------------------------|
| <b>hit</b>         | MASCOT protein hit no.  |
| <b>peptides</b>    | no. of matched peptides |
| <b>accession</b>   | database accession no.  |
| <b>description</b> | protein description     |

| hit                                                                                         | peptides | accession   | description                                                                                       |
|---------------------------------------------------------------------------------------------|----------|-------------|---------------------------------------------------------------------------------------------------|
| <b>I. Corynebacterium glutamicum; elastase digest; nLC-ESI MS/MS; no search specificity</b> |          |             |                                                                                                   |
| 1                                                                                           | 144      | Cg1537      | (ptsG) [M]: GLUCOSE-SPECIFIC ENZYME II BC COMPONENT OF PTS (EC 2.7.1.69)                          |
| 2                                                                                           | 97       | P00772 ELA1 | Elastase-1 precursor - <i>Sus scrofa</i>                                                          |
| 3                                                                                           | 74       | Cg0446      | (sdhA) [C]: succinate dehydrogenase A (EC 1.3.99.1)                                               |
| 4                                                                                           | 71       | Cg2705      | (amyE) [S]: MALTOSE-BINDING PROTEIN PRECURSOR                                                     |
| 5                                                                                           | 65       | Cg3009      | [C]: hypothetical protein predicted by Glimmer/Critica                                            |
| 6                                                                                           | 62       | Cg2181      | [S]: ABC-type peptide transport system, secreted component                                        |
| 7                                                                                           | 47       | Cg2120      | (ptsF) [M]: SUGAR SPECIFIC PTS SYSTEM, FRUCTOSE/MANNITOL-SPECIFIC TRANSPORT PROTEIN (EC 2.7.1.69) |
| 8                                                                                           | 44       | Cg2911      | [S]: ABC-type Mn/Zn transport system, secreted Mn/Zn-binding (lipo)protein (surface adhesin)      |
| 11                                                                                          | 41       | Cg0447      | (sdhB) [C]: succinate dehydrogenase B                                                             |
| 9                                                                                           | 39       | Cg2925      | (ptsS) [M]: ENZYME II SUCROSE PROTEIN (EC 2.7.1.69)                                               |
| 10                                                                                          | 39       | Cg2409      | (ctaC) [M]: CYTOCHROME C OXIDASE CHAIN II (EC 1.9.3.1)                                            |
| 16                                                                                          | 30       | Cg2404      | (qcrA1) [M]: RIESKE IRON-SULFUR PROTEIN                                                           |
| 14                                                                                          | 29       | Cg1366      | (atpA) [C]: PROBABLE ATP SYNTHASE ALPHA CHAIN PROTEIN (EC 3.6.1.34)                               |
| 13                                                                                          | 28       | Cg3138      | [M]: Membrane protease subunit, stomatin/prohibitin homolog                                       |
| 15                                                                                          | 27       | Cg2780      | (ctaD) [M]: PROBABLE CYTOCHROME C OXIDASE POLYPEPTIDE SUBUNIT (EC 1.9.3.1)                        |
| 19                                                                                          | 27       | Cg2403      | (qcrB) [M]: CYTOCHROME B, MEMBRANE PROTEIN (EC 1.10.2.2)                                          |
| 12                                                                                          | 26       | Cg2708      | (msiK1) [C]: ABC-type sugar transport system, ATPase component                                    |
| 17                                                                                          | 25       | Cg2875      | [C]: hypothetical protein predicted by Glimmer                                                    |
| 21                                                                                          | 23       | Cg1332      | [S]: PUTATIVE SECRETED HYDROLASE                                                                  |
| 18                                                                                          | 22       | Cg3182      | (cop1) [S]: Trehalose corynomycolyl transferase (EC 2.3.1.122)                                    |
| 23                                                                                          | 22       | Cg1363      | (atpE) [M]: ATP SYNTHASE C CHAIN (EC 3.6.1.34)                                                    |
| 27                                                                                          | 22       | Cg0413      | (cmt1) [S]: Trehalose corynomycolyl transferase (EC 2.3.1.122)                                    |
| 24                                                                                          | 19       | Cg0683      | [M]: permease                                                                                     |
| 20                                                                                          | 18       | Cg0953      | [M]: Na+/proline, Na+/panthothenate symporter or related permease                                 |
| 30                                                                                          | 18       | Cg0737      | [S]: ABC-type transport system, secreted lipoprotein component                                    |
| 31                                                                                          | 17       | Cg1368      | (atpD) [C]: ATP SYNTHASE ALPHA SUBUNIT (EC 3.6.1.34)                                              |
| 22                                                                                          | 16       | Cg1656      | (ndh) [MS]: NADH DEHYDROGENASE (EC 1.6.99.3)                                                      |
| 38                                                                                          | 16       | Cg3008      | (porA) [M]: PORIN                                                                                 |
| 25                                                                                          | 15       | Cg1603      | [MS]: CONSERVED MEMBRANE PROTEIN                                                                  |
| 26                                                                                          | 15       | Cg3186      | (cmt2) [S]: Trehalose corynomycolyl transferase (EC 2.3.1.122)                                    |
| 28                                                                                          | 15       | Cg3365      | (rmpC) [M]: putative ribitol transport membrane protein                                           |
| 35                                                                                          | 14       | Cg1314      | (putP) [M]: PROLINE TRANSPORT SYSTEM                                                              |
| 39                                                                                          | 14       | Cg0834      | [S]: Bacterial extracellular solute-binding protein, fa                                           |
| 29                                                                                          | 13       | Cg1081      | [C]: ABC-type multidrug transport system, ATPase component                                        |
| 44                                                                                          | 13       | Cg1556      | [C]: conserved hypothetical protein                                                               |
| 78                                                                                          | 13       | Cg1362      | (atpB) [M]: ATP SYNTHASE F0 SUBUNIT 6 (EC 3.6.1.34)                                               |
| 33                                                                                          | 12       | Cg2843      | (pstB) [C]: ABC-type phosphate transport system, ATPase component                                 |

| hit | peptides | accession | description                                                                                    |
|-----|----------|-----------|------------------------------------------------------------------------------------------------|
| 34  | 12       | Cg0924    | [S]: ABC-type cobalamin/Fe <sup>3+</sup> -siderophores transport sys                           |
| 37  | 12       | Cg0756    | (cstA) [M]: PUTATIVE CARBON STARVATION PROTEIN A                                               |
| 41  | 12       | Cg1082    | [M]: putative membrane protein                                                                 |
| 64  | 12       | Cg0359    | [M]: PUTATIVE MEMBRANE PROTEIN                                                                 |
| 52  | 11       | Cg2262    | (ftsY) [S]: Signal recognition particle GTPase                                                 |
| 61  | 11       | Cg2361    | [C]: Cell division initiation protein - Antigen 84 homolog                                     |
| 36  | 10       | Cg2810    | [M]: Na <sup>+</sup> /H <sup>+</sup> -dicarboxylate symporter family                           |
| 43  | 10       | Cg2195    | [M]: putative secreted or membrane protein                                                     |
| 53  | 10       | Cg3368    | [M]: ABC-transporter permease protein                                                          |
| 54  | 10       | Cg2912    | [C]: ABC-type cobalamin/Fe <sup>3+</sup> -siderophores transport system, ATPase component      |
| 85  | 10       | Cg0445    | (sdhCD) [M]: succinate dehydrogenase CD                                                        |
| 42  | 9        | Cg2845    | (pstC) [M]: ABC-type phosphate transport system, permease component                            |
| 63  | 9        | Cg2704    | [M]: ABC-type sugar transport system, permease component                                       |
| 68  | 9        | Cg0753    | [S]: secreted protein                                                                          |
| 70  | 9        | Cg2211    | [M]: putative membrane protein                                                                 |
| 123 | 9        | Cg1238    | [M]: putative membrane protein                                                                 |
| 45  | 8        | Cg1228    | [C]: ABC-type cobalt transport system, ATPase component                                        |
| 47  | 8        | Cg0587    | (tuf) [C]: ELONGATION FACTOR TU                                                                |
| 48  | 8        | Cg2184    | [C]: ATPase component of peptide ABC-type transport system, contains duplicated ATPase domains |
| 49  | 8        | Cg3395    | (proP) [M]: PROLINE/ECTOINE CARRIER                                                            |
| 55  | 8        | Cg1791    | (gap) [C]: GLYCERALDEHYDE-3-PHOSPHATE DEHYDROGENASE (EC 1.2.1.12)                              |
| 56  | 8        | Cg2844    | (pstA) [M]: ABC-type phosphate transport system, permease component                            |
| 58  | 8        | Cg1169    | [M]: Na <sup>+</sup> -dependent transporters of the SNF family                                 |
| 59  | 8        | Cg1001    | (mscL) [M]: LARGE CONDUCTANCE MECHANOSENSITIVE CHANNEL                                         |
| 79  | 8        | Cg2405    | (qcrC) [M]: CYTOCHROME C1                                                                      |
| 101 | 8        | Cg2157    | (terC) [M]: TELLURIUM RESISTANCE MEMBRANE PROTEIN                                              |
| 88  | 7        | Cg1429    | [M]: putative membrane protein                                                                 |
| 100 | 7        | Cg2052    | [S]: putative secreted protein                                                                 |
| 137 | 7        | Cg2949    | [S]: putative secreted protein                                                                 |
| 152 | 7        | Cg1312    | [M]: putative membrane protein                                                                 |
| 257 | 7        | Cg3244    | [C]: conserved hypothetical protein                                                            |
| 46  | 6        | Cg1345    | (narK) [M]: PUTATIVE NITRATE/NITRITE TRANSPORTER                                               |
| 51  | 6        | Cg0780    | [M]: membrane protein ribonuclease BN-like family                                              |
| 62  | 6        | Cg2703    | [M]: Sugar permease                                                                            |
| 67  | 6        | Cg2137    | (gluB) [S]: GLUTAMATE SECRETED BINDING PROTEIN                                                 |
| 73  | 6        | Cg0545    | (pitA) [M]: PUTATIVE LOW-AFFINITY PHOSPHATE TRANSPORT PROTEIN                                  |
| 81  | 6        | Cg1624    | [M]: NhaP-type Na <sup>+</sup> /H <sup>+</sup> and K <sup>+</sup> /H <sup>+</sup> antiporter   |
| 106 | 6        | Cg3255    | (uspA3) [C]: UNIVERSAL STRESS PROTEIN FAMILY                                                   |
| 109 | 6        | Cg0040    | [S]: PUTATIVE SECRETED PROTEIN                                                                 |
| 146 | 6        | Cg2684    | [M]: membrane protein DedA family                                                              |

| hit | peptides | accession | description                                                                                                                       |
|-----|----------|-----------|-----------------------------------------------------------------------------------------------------------------------------------|
| 153 | 6        | Cg2196    | [M]: putative secreted or membrane protein                                                                                        |
| 235 | 6        | Cg0047    | [M]: conserved hypothetical protein                                                                                               |
| 265 | 6        | Cg2406    | (ctaE) [M]: CYTOCHROME C OXIDASE SUBUNIT 3 (EC 1.9.3.1)                                                                           |
| 71  | 5        | Cg0944    | [M]: Xanthine/uracil permeases family                                                                                             |
| 86  | 5        | Cg1604    | [S]: putative secreted protein                                                                                                    |
| 98  | 5        | Cg0229    | (gltB) [C]: GLUTAMINE 2-OXOGLUTARATE AMINOTRANSFERASE LARGE SU (EC 1.4.1.13)                                                      |
| 104 | 5        | Cg1367    | (atpG) [C]: ATP SYNTHASE GAMMA SUBUNIT (EC 3.6.1.34)                                                                              |
| 110 | 5        | Cg2425    | [M]: Predicted permease                                                                                                           |
| 127 | 5        | Cg1661    | [M]: Arsenite efflux pump ACR3 or related permease                                                                                |
| 132 | 5        | Cg1579    | [S]: putative secreted protein                                                                                                    |
| 164 | 5        | Cg2958    | (butA) [C]: L-2,3-butanediol dehydrogenase/acetoin reductase (EC 1.1.1.5)                                                         |
| 191 | 5        | Cg0314    | (brnF) [M]: branched chain amino acid exporter, large subunit                                                                     |
| 192 | 5        | Cg2812    | [C]: ABC-type transport system, involved in lipoprotein release, ATPase component                                                 |
| 208 | 5        | Cg2893    | [M]: Permease of the major facilitator superfamily                                                                                |
| 209 | 5        | Cg1364    | (atpF) [MS]: ATP synthase B chain (EC 3.6.1.34)                                                                                   |
| 217 | 5        | Cg0561    | (secE) [M]: SecE subunit of protein translocation complex                                                                         |
| 260 | 5        | Cg2735    | [M]: putative membrane protein                                                                                                    |
| 348 | 5        | Cg2424    | [M]: putative membrane protein                                                                                                    |
| 491 | 5        | Cg2151    | [C]: Similar to phage shock protein A                                                                                             |
| 575 | 5        | Cg3237    | (sod) [C]: MANGANESE SUPEROXIDE DISMUTASE (EC 1.15.1.1)                                                                           |
| 40  | 4        | Cg2743    | (fas-IA) [C]: FATTY ACID SYNTHASE (EC 2.3.1.85, 2.3.1.38, 2.3.1.39, 2.3.1.41, 1.1.1.100, 4.2.1.60, 4.2.1.61, 1.3.1.10, 3.1.2.14)  |
| 57  | 4        | Cg2984    | (ftsH) [M]: CELL-DIVISION PROTEIN (ATP-DEPENDENT ZN METALLOPEPTIDASE) (EC 3.4.24.)                                                |
| 65  | 4        | Cg0647    | (secY) [M]: preprotein translocase subunit SecY                                                                                   |
| 72  | 4        | Cg3024    | (mrpA) [M]: NADH ubiquinone oxidoreductase subunit 5 (chain L)/Multisubunit Na <sup>+</sup> /H <sup>+</sup> antiporter, A subunit |
| 76  | 4        | Cg0326    | (nuoL) [M]: NADH-QUINONE OXIDOREDUCTASE CHAIN 5 (EC 1.6.5.3)                                                                      |
| 84  | 4        | Cg0456    | [M]: permease, major facilitator superfamily                                                                                      |
| 91  | 4        | Cg3356    | [M]: Na <sup>+</sup> /H <sup>+</sup> -dicarboxylate symporter                                                                     |
| 105 | 4        | Cg0583    | (fusA) [C]: ELONGATION FACTOR G                                                                                                   |
| 112 | 4        | Cg2677    | [M]: ABC-type dipeptide/oligopeptide/nickel transport system, permease component                                                  |
| 113 | 4        | Cg1730    | [S]: secreted protease subunit, stomatin/prohibitin homolog                                                                       |
| 119 | 4        | Cg2546    | [M]: putative membrane protein                                                                                                    |
| 131 | 4        | Cg0414    | (wzz) [M]: cell surface polysaccharide biosynthesis / Chain length determinant protein                                            |
| 148 | 4        | Cg0336    | (ponA) [S]: PENICILLIN-BINDING PROTEIN 1B (EC 2.4.2.-)                                                                            |
| 151 | 4        | Cg2846    | (pstS) [S]: ABC-type phosphate transport system, secreted component                                                               |
| 154 | 4        | Cg2568    | (dctM) [M]: PUTATIVE C4-DICARBOXYLATE TRANSPORT SYSTEM (PERMEASE LARGE PROTEIN)                                                   |
| 158 | 4        | Cg3060    | (cgtS6) [M]: probable two component sensor kinase                                                                                 |
| 161 | 4        | Cg0286    | [M]: CONSERVED HYPOTHETICAL membrane PROTEIN                                                                                      |
| 165 | 4        | Cg1658    | [M]: Permease of the major facilitator superfamily                                                                                |
| 169 | 4        | Cg0324    | (mnhD) [M]: hydrogenlyase subunit 3/Multisubunit Na <sup>+</sup> /H <sup>+</sup> antipoter, MnhD subunit                          |
| 195 | 4        | Cg3301    | [M]: Permease of the major facilitator superfamily                                                                                |

| hit | peptides | accession | description                                                                                                   |
|-----|----------|-----------|---------------------------------------------------------------------------------------------------------------|
| 202 | 4        | Cg0736    | [C]: ABC-type transporter, ATPase component                                                                   |
| 220 | 4        | Cg1247    | [S]: putative secreted protein                                                                                |
| 252 | 4        | Cg1867    | (secD) [M]: Preprotein translocase subunit SecD                                                               |
| 298 | 4        | Cg0061    | (rodA) [M]: PUTATIVE FTSW/RODA/SPOVE FAMILY CELL CYCLE PROTEIN                                                |
| 313 | 4        | Cg0980    | [S]: secreted protein related to metalloendopeptidases                                                        |
| 340 | 4        | Cg2799    | (pknE) [S]: putative secreted protein                                                                         |
| 410 | 4        | Cg1229    | [M]: ABC-type cobalt transport system, permease component CbiQ                                                |
| 457 | 4        | Cg2154    | (pgsA2) [M]: CDP-DIACYLGLYCEROL--GLYCEROL-3-PHOSPHATE 3-PHOSPHATIDYLTRANSFERASE (EC 2.7.8.5)                  |
| 508 | 4        | Cg0952    | [M]: PUTATIVE INTEGRAL MEMBRANE PROTEIN                                                                       |
| 542 | 4        | Cg2913    | [M]: ABC-type Mn <sup>2+</sup> /Zn <sup>2+</sup> transport system, permease component                         |
| 557 | 4        | Cg1109    | (porB) [S]: Anion-specific porin precursor                                                                    |
| 588 | 4        | Cg0935    | [C]: conserved hypothetical protein                                                                           |
| 592 | 4        | Cg2362    | [M]: putative membrane protein                                                                                |
| 620 | 4        | Cg0982    | [M]: membrane protein                                                                                         |
| 716 | 4        | Cg2325    | [C]: hypothetical protein predicted by Glimmer/Critica                                                        |
| 66  | 3        | Cg3187    | [M]: putative membrane protein                                                                                |
| 77  | 3        | Cg0577    | (rpoC) [C]: DNA-DIRECTED RNA POLYMERASE BETA~ CHAIN (EC 2.7.7.6)                                              |
| 87  | 3        | Cg0284    | [M]: drug exporter of the RND superfamily                                                                     |
| 92  | 3        | Cg2590    | [M]: Xanthine/uracil permease                                                                                 |
| 99  | 3        | Cg2496    | [S]: putative secreted protein                                                                                |
| 107 | 3        | Cg3019    | [M]: putative secreted protein                                                                                |
| 115 | 3        | Cg3161    | [M]: putative membrane protein                                                                                |
| 117 | 3        | Cg0486    | [M]: PUTATIVE ABC TRANSPORTER INTEGRAL MEMBRANE PROTEIN                                                       |
| 120 | 3        | Cg1664    | [M]: Sulfate permease or related transporter (MFS superfamily)                                                |
| 128 | 3        | Cg0732    | [M]: PUTATIVE ABC TRANSPORT SYSTEM INTEGRAL MEMBRANE PR                                                       |
| 134 | 3        | Cg3026    | (mrpD) [M]: NADH-ubiquinone oxidoreductase/Multisubunit Na <sup>+</sup> /H <sup>+</sup> antiporter, D subunit |
| 141 | 3        | Cg1359    | [M]: membrane protein, UDP-N-acetylmuramyl pentapeptide phosphotransferase/UDP-N- acetylglucosamine-1-pho     |
| 144 | 3        | Cg1111    | (eno) [C]: ENOLASE (EC 4.2.1.11)                                                                              |
| 168 | 3        | Cg1227    | [M]: putative membrane protein                                                                                |
| 173 | 3        | Cg1231    | (chaA) [M]: Ca <sup>2+</sup> /H <sup>+</sup> antiporter                                                       |
| 179 | 3        | Cg2739    | [M]: Permease of the major facilitator superfamily                                                            |
| 180 | 3        | Cg0417    | (capD) [M]: PROBABLE DTDP-GLUCOSE 4,6-DEHYDRATASE TRANSMEMBRANE PROTEIN (EC 4.2.1.46)                         |
| 182 | 3        | Cg0082    | [M]: Voltage gated chloride channel                                                                           |
| 186 | 3        | Cg2393    | [M]: putative membrane protein                                                                                |
| 194 | 3        | Cg2675    | [C]: ATPase component of ABC-type transport system, contains duplicated ATPase domains                        |
| 203 | 3        | Cg3335    | (mez) [C]: MALIC ENZYME (EC 1.1.1.40)                                                                         |
| 207 | 3        | Cg0508    | [S]: iron/thiamine transport system, secreted component                                                       |
| 210 | 3        | Cg0165    | [M]: ABC-2 type transporter                                                                                   |
| 225 | 3        | Cg1883    | [S]: putative secreted protein                                                                                |
| 228 | 3        | Cg0489    | [M]: hypothetical membrane protein                                                                            |

| hit  | peptides | accession | description                                                                                                                       |
|------|----------|-----------|-----------------------------------------------------------------------------------------------------------------------------------|
| 240  |          | 3 Cg2539  | (ectP) [M]: ectoine/proline/glycine betaine carrier EctP                                                                          |
| 241  |          | 3 Cg1864  | (dciAE) [S]: ABC-type dipeptide/oligopeptide/nickel transport systems, secreted component                                         |
| 243  |          | 3 Cg2183  | [M]: ABC-type peptide transport system, permease component                                                                        |
| 246  |          | 3 Cg2173  | (dinF) [M]: PUTATIVE DNA-DAMAGE-INDUCIBLE MEMBRANE PROTEIN                                                                        |
| 248  |          | 3 Cg2563  | (lcoP) [M]: ECTOINE BETAINE TRANSPORTER                                                                                           |
| 259  |          | 3 Cg2408  | [M]: putative membrane protein                                                                                                    |
| 261  |          | 3 Cg0752  | [S]: PUTATIVE secreted or MEMBRANE PROTEIN                                                                                        |
| 264  |          | 3 Cg3371  | [M]: Na <sup>+</sup> -dependent transporter                                                                                       |
| 266  |          | 3 Cg2884  | [M]: Dipeptide/tripeptide permease                                                                                                |
| 272  |          | 3 Cg1225  | (benK3) [M]: putative benzoate transport transmembrane protein                                                                    |
| 273  |          | 3 Cg0831  | [M]: SUGAR ABC TRANSPORTER, PERMEASE PROTEIN                                                                                      |
| 305  |          | 3 Cg3367  | [C]: ABC-type multidrug transport system, ATPase component                                                                        |
| 347  |          | 3 Cg0568  | [M]: Permease for amino acids and related compounds, fa                                                                           |
| 355  |          | 3 Cg0470  | [M]: conserved secreted protein                                                                                                   |
| 357  |          | 3 Cg2370  | (ftsW) [M]: Bacterial cell division membrane protein                                                                              |
| 358  |          | 3 Cg3068  | (fda) [C]: fructose-bisphosphate aldolase (EC 4.1.2.13)                                                                           |
| 364  |          | 3 Cg1479  | (glgP1) [C]: PUTATIVE GLYCOGEN PHOSPHORYLASE (EC 2.4.1.1)                                                                         |
| 371  |          | 3 Cg1483  | [M]: putative membrane protein                                                                                                    |
| 395  |          | 3 Cg3413  | (azlC) [M]: branched-chain amino acid permease (azaleucine resistance)                                                            |
| 398  |          | 3 Cg1665  | [S]: putative secreted protein                                                                                                    |
| 421  |          | 3 Cg2166  | (gpsI) [C]: PUTATIVE POLYRIBONUCLEOTIDE PHOSPHORYLASE / GUANOSINE PENTAPHOSPHATESYNTHEASE (EC 2.7.7.8)                            |
| 437  |          | 3 Cg2777  | [M]: putative membrane protein                                                                                                    |
| 438  |          | 3 Cg0327  | [M]: membrane protein                                                                                                             |
| 452  |          | 3 Cg3227  | (lldA) [C]: PUTATIVE L-LACTATE DEHYDROGENASE (EC 1.1.2.3)                                                                         |
| 469  |          | 3 Cg0018  | [M]: HYPOTHETICAL MEMBRANE PROTEIN                                                                                                |
| 500  |          | 3 Cg0735  | [M]: ABC transporter, transmembrane component                                                                                     |
| 507  |          | 3 Cg2412  | [M]: putative membrane protein                                                                                                    |
| 513  |          | 3 Cg1350  | (mob) [C]: PUTATIVE MOLYBDOPTERIN-GUANINE DINUCLEOTIDE BIOSYNTHESIS PROTEIN                                                       |
| 533  |          | 3 Cg0769  | [M]: ABC-type cobalamin/Fe <sup>3+</sup> -siderophores transport system, permease component                                       |
| 752  |          | 3 Cg0914  | (ftsE) [C]: CELL DIVISION ATP-BINDING PROTEIN                                                                                     |
| 754  |          | 3 Cg1685  | (tatX) [M]: Sec-independent protein secretion pathway component                                                                   |
| 876  |          | 3 Cg0514  | [M]: hypothetical membrane protein                                                                                                |
| 901  |          | 3 Cg2096  | [M]: putative membrane protein                                                                                                    |
| 910  |          | 3 Cg1387  | (fixB) [C]: PUTATIVE ELECTRON TRANSFER FLAVOPROTEIN, ALPHA SUBUNIT                                                                |
| 914  |          | 3 Cg0016  | [M]: PUTATIVE INTEGRAL MEMBRANE PROTEIN                                                                                           |
| 1068 |          | 3 Cg0923  | [M]: membrane protein                                                                                                             |
| 1122 |          | 3 Cg1741  | [M]: putative membrane protein                                                                                                    |
| 1275 |          | 3 Cg3366  | (rmpA) [C]: putative ribitol-specific enzyme II of PTS system                                                                     |
| 32   |          | 2 Cg0957  | (fas-IB) [C]: FATTY ACID SYNTHASE (EC 2.3.1.85, 2.3.1.38, 2.3.1.39, 2.3.1.41, 1.1.1.100, 4.2.1.60, 4.2.1.61, 1.3.1.10, 3.1.2.14)) |
| 50   |          | 2 Cg1995  | [C]: hypothetical protein predicted by Glimmer/Critica                                                                            |

| hit | peptides | accession | description                                                                                        |
|-----|----------|-----------|----------------------------------------------------------------------------------------------------|
| 74  | 2        | Cg0668    | [MS]: segregation ATPase FtsK/SpoIIIE family                                                       |
| 75  | 2        | Cg0968    | [C]: PUTATIVE ATP-DEPENDENT HELICASE (EC 3.6.1.)                                                   |
| 80  | 2        | Cg0455    | [M]: permease, major facilitator superfamily                                                       |
| 82  | 2        | Cg0133    | [M]: p-aminobenzoyl-glutamate transporter                                                          |
| 83  | 2        | Cg1281    | [M]: ABC-type multidrug/protein/lipid transport system, ATPase component                           |
| 89  | 2        | Cg0738    | (dnaE2) [C]: PUTATIVE DNA POLYMERASE III ALPHA CHAIN (EC 2.7.7.6)                                  |
| 94  | 2        | Cg0275    | (mgtE2) [M]: MG2+ TRANSPORTER                                                                      |
| 95  | 2        | Cg2811    | [M]: ABC-type transport system, involved in lipoprotein release, permease component                |
| 97  | 2        | Cg2111    | (hrpA) [C]: PROBABLE ATP-DEPENDENT RNA HELICASE PROTEIN (EC 3.-.-.-)                               |
| 121 | 2        | Cg0835    | (msiK2) [C]: ABC-type sugar transport systems, ATPase component                                    |
| 135 | 2        | Cg0468    | [M]: cobalamin/Fe3+-siderophores transport systems, permease component                             |
| 143 | 2        | Cg0235    | (embC) [M]: Probable arabinosyltransferase, membrane protein                                       |
| 149 | 2        | Cg2641    | [C]: Bacterial regulatory protein, LuxR family                                                     |
| 150 | 2        | Cg0236    | [M]: membrane protein                                                                              |
| 156 | 2        | Cg2095    | [M]: putative membrane protein                                                                     |
| 159 | 2        | Cg3346    | (leuS) [C]: LEUCYL-TRNA SYNTHETASE (EC 6.1.1.4)                                                    |
| 160 | 2        | Cg0161    | [M]: putative secreted or membrane protein                                                         |
| 162 | 2        | Cg0206    | [M]: PROBABLE TRANSPORTER                                                                          |
| 163 | 2        | Cg0992    | [M]: Sulfate permease or related transporter (MFS superfamily)                                     |
| 166 | 2        | Cg3245    | [M]: Permease of the major facilitator superfamily                                                 |
| 170 | 2        | Cg2388    | (pknL) [M]: PUTATIVE SERINE/THREONINE PROTEIN KINASE (EC 2.7.1.37)                                 |
| 171 | 2        | Cg3216    | (gntP) [M]: GLUCONATE PERMEASE                                                                     |
| 172 | 2        | Cg1399    | [M]: Permease of the major facilitator superfamily                                                 |
| 181 | 2        | Cg2279    | [M]: ABC-type multidrug/protein/lipid transport system, transmembrane ATPase component             |
| 183 | 2        | Cg3079    | (clpB) [C]: PROBABLE ATP-DEPENDENT PROTEASE (HEAT SHOCK PROTEIN) (EC 3.-.-.-)                      |
| 185 | 2        | Cg0868    | (secA) [C]: PREPROTEIN TRANSLOCASE SUBUNIT SECA                                                    |
| 187 | 2        | Cg0238    | [C]: L-GULONOLACTONE OXIDASE (EC 1.1.3.8)                                                          |
| 188 | 2        | Cg0998    | [M]: Trypsin-like serine protease                                                                  |
| 190 | 2        | Cg3252    | [M]: putative preprotein translocase subunit YidC, SpoIIJ homolog                                  |
| 197 | 2        | Cg0896    | [M]: membrane protein                                                                              |
| 212 | 2        | Cg3179    | (fadD2) [C]: PUTATIVE ACYL-COA SYNTHETASE (EC 6.2.1.3)                                             |
| 213 | 2        | Cg1016    | (betP) [M]: glycine betaine transporter                                                            |
| 215 | 2        | Cg1506    | [M]: putative membrane protein                                                                     |
| 219 | 2        | Cg1456    | [C]: Predicted signal-transduction protein containing cAMP-binding and CBS domain                  |
| 221 | 2        | Cg0722    | [M]: drug exporter, RND superfamily                                                                |
| 222 | 2        | Cg2939    | [M]: ABC-type dipeptide/oligopeptide/nickel transport system, fused permease and ATPase components |
| 224 | 2        | Cg2971    | (lmrB) [M]: LINCOMYCIN RESISTANCE PROTEIN LMRB                                                     |
| 231 | 2        | Cg0864    | (mtrB) [M]: Signal transduction histidine kinase                                                   |
| 236 | 2        | Cg1280    | (odhA) [C]: 2-OXOGLUTARATE DEHYDROGENASE (EC 1.2.4.2)                                              |
| 237 | 2        | Cg1424    | (lysE) [M]: Lysine efflux permease                                                                 |

| hit | peptides | accession | description                                                                               |
|-----|----------|-----------|-------------------------------------------------------------------------------------------|
| 238 | 2        | Cg2201    | [M]: signal transduction histidine kinase                                                 |
| 244 | 2        | Cg2212    | [M]: putative membrane protein                                                            |
| 262 | 2        | Cg0790    | (lpdA) [C]: DIHYDROLIPOAMIDE DEHYDROGENASE (EC 1.8.1.4)                                   |
| 263 | 2        | Cg2077    | [M]: putative membrane protein                                                            |
| 269 | 2        | Cg1545    | [M]: Permease of the major facilitator superfamily                                        |
| 270 | 2        | Cg1212    | [M]: Permease of the major facilitator superfamily                                        |
| 276 | 2        | Cg3165    | [M]: putative membrane protein                                                            |
| 277 | 2        | Cg1299    | (cydD) [M]: ABC-type multidrug/protein/lipid transport system, ATPase component           |
| 284 | 2        | Cg1412    | [M]: Ribose/xylose/arabinose/galactoside ABC-type transport system, permease component    |
| 286 | 2        | Cg2466    | (aceE) [C]: PYRUVATE DEHYDROGENASE E1 COMPONENT (EC 1.2.4.1)                              |
| 287 | 2        | Cg2158    | (ftsK) [M]: CELL DIVISION PROTEIN, REQUIRED FOR CELL DIVISION AND CHROMOSOME PARTITIONING |
| 288 | 2        | Cg2192    | (mqo) [C]: MALATE:QUINONE OXIDOREDUCTASE OXIDOREDUCTASE (EC 1.1.99.16)                    |
| 290 | 2        | Cg2372    | (mraY) [M]: PHOSPHO-N-ACETYLMURAMOYL-PENTAPEPTIDE-TRANSFERASE (EC 2.7.8.13)               |
| 291 | 2        | Cg3132    | [M]: putative membrane protein                                                            |
| 307 | 2        | Cg2258    | (glnD) [C]: PROBABLE PROTEIN-PII URIDYLTRANSFERASE (EC 2.7.7.59)                          |
| 310 | 2        | Cg0057    | (pknB) [C]: EUKARYOTIC-TYPE SERINE/THREONINE KINASE (EC 2.7.1.)                           |
| 312 | 2        | Cg2110    | [M]: putative membrane protein                                                            |
| 314 | 2        | Cg3334    | [M]: putative arabinose efflux permease                                                   |
| 322 | 2        | Cg2643    | (benE) [M]: BENZOATE MEMBRANE TRANSPORT PROTEIN                                           |
| 325 | 2        | Cg2552    | [C]: ATPase component of ABC-type transport system, contains duplicated ATPase domain     |
| 333 | 2        | Cg1142    | [M]: Na <sup>+</sup> /proline, Na <sup>+</sup> /panthothenate symporter                   |
| 334 | 2        | Cg2680    | [C]: Aminotransferase class-III, pyridoxal-phosphate dependent                            |
| 341 | 2        | Cg0331    | (cgtS1) [M]: PROBABLE TWO-COMPONENT SENSOR HISTIDINE KINASE (EC 2.7.3.-)                  |
| 349 | 2        | Cg1289    | [M]: Permease of the major facilitator superfamily                                        |
| 359 | 2        | Cg1577    | [S]: putative secreted hydrolase                                                          |
| 361 | 2        | Cg1365    | (atpH) [C]: H <sup>+</sup> -ATPASE DELTA SUBUNIT                                          |
| 363 | 2        | Cg2618    | (vanK) [M]: VANILLATE TRANSPORTER VANK                                                    |
| 377 | 2        | Cg1673    | (ppmN) [M]: polyprenol-phosphate-mannose synthase domain 2 (EC 2.3.1.-)                   |
| 382 | 2        | Cg1086    | [M]: putative membrane protein                                                            |
| 386 | 2        | Cg1880    | (thrS) [C]: THREONYL-TRNA SYNTHETASE (EC 6.1.1.3)                                         |
| 407 | 2        | Cg2695    | [C]: ABC-type transport system, ATPase component                                          |
| 416 | 2        | Cg0781    | [M]: membrane protein                                                                     |
| 418 | 2        | Cg2301    | [M]: Permease of the major facilitator superfamily                                        |
| 419 | 2        | Cg1305    | [M]: Amino acid permease                                                                  |
| 420 | 2        | Cg1672    | (ppmC) [C]: polyprenol-phosphate-mannose synthase domain 1                                |
| 422 | 2        | Cg1546    | (rbsK1) [C]: PUTATIVE RIBOKINASE PROTEIN (EC 2.7.1.15)                                    |
| 423 | 2        | Cg0396    | [M]: Glycosyl transferase                                                                 |
| 430 | 2        | Cg2470    | [S]: SECRETED ABC TRANSPORTER SUBSTRATE-BINDING PROTEIN                                   |
| 431 | 2        | Cg2891    | (poxB) [C]: PYRUVATE DEHYDROGENASE (EC 1.2.2.2)                                           |
| 432 | 2        | Cg0469    | [C]: cobalamin/Fe <sup>3+</sup> -siderophores transport system, ATPase component          |



| hit | peptides | accession | description                                                                                           |
|-----|----------|-----------|-------------------------------------------------------------------------------------------------------|
| 439 | 2        | Cg0088    | (citP) [M]: Citrate transporter                                                                       |
| 451 | 2        | Cg3027    | (mrpE) [S]: Multisubunit Na <sup>+</sup> /H <sup>+</sup> antiporter, subunit E                        |
| 463 | 2        | Cg1020    | [C]: double-stranded beta-helix domain                                                                |
| 464 | 2        | Cg1245    | [M]: putative membrane protein                                                                        |
| 471 | 2        | Cg2139    | (gluD) [M]: GLUTAMATE PERMEASE                                                                        |
| 476 | 2        | Cg0926    | [M]: ABC-type cobalamin/Fe <sup>3+</sup> -siderophores transport system, permease component           |
| 482 | 2        | Cg0480    | (fadD5) [C]: LONG-CHAIN-FATTY-ACID-COA LIGASE (EC 6.2.1.3)                                            |
| 495 | 2        | Cg0893    | [S]: secreted protein containing a PDZ domain                                                         |
| 497 | 2        | Cg2291    | (pyk) [C]: PYRUVATE KINASE (EC 2.7.1.40)                                                              |
| 502 | 2        | Cg1064    | [M]: Branched-chain amino acid ABC-type transport system, permease component                          |
| 517 | 2        | Cg2558    | [C]: related to aldose 1-epimerase                                                                    |
| 518 | 2        | Cg1115    | (ppx2) [C]: EXOPOLYPHOSPHATASE (EC 3.6.1.11)                                                          |
| 532 | 2        | Cg1657    | (ufaA) [C]: PUTATIVE CYCLOPROPANE FATTY ACID SYNTHASE (CYCLOPROPANE-FATTY-ACYL-PHOSPHOLIPID SYNTHASE) |
| 536 | 2        | Cg0249    | [M]: polysaccharide/polyol phosphate export systems, permease component                               |
| 539 | 2        | Cg0262    | (modB) [M]: sulfate/molybdate transport system, permease component                                    |
| 541 | 2        | Cg0390    | [M]: permease, major facilitator family                                                               |
| 560 | 2        | Cg2487    | [C]: conserved hypothetical protein                                                                   |
| 563 | 2        | Cg1474    | [C]: putative ATP/GTP-binding protein                                                                 |
| 570 | 2        | Cg1643    | (gnd) [C]: 6-PHOSPHOGLUCONATE DEHYDROGENASE (EC 1.1.1.44)                                             |
| 574 | 2        | Cg3135    | [M]: putative membrane protein                                                                        |
| 577 | 2        | Cg2577    | [M]: Predicted multitransmembrane, metal-binding protein                                              |
| 585 | 2        | Cg1203    | [C]: Mg-chelatase subunit ChII                                                                        |
| 595 | 2        | Cg3226    | [M]: permease of the major facilitator superfamily                                                    |
| 597 | 2        | Cg1505    | [S]: putative secreted protein                                                                        |
| 600 | 2        | Cg0334    | [S]: secreted phosphohydrolase                                                                        |
| 619 | 2        | Cg2657    | [MS]: putative membrane protein - fragment                                                            |
| 627 | 2        | Cg1650    | (pctC) [M]: ABC-type phosphate/phosphonate transport system, permease component                       |
| 647 | 2        | Cg0004    | (dnaN) [C]: DNA POLYMERASE III, BETA SUBUNIT (EC 2.7.7.7)                                             |
| 660 | 2        | Cg1868    | (secN) [MS]: Preprotein translocase subunit YajC homolog                                              |
| 661 | 2        | Cg2719    | [C]: PUTATIVE ENTEROCHELIN ESTERASE                                                                   |
| 665 | 2        | Cg1354    | (rho) [C]: Transcription termination factor Rho                                                       |
| 700 | 2        | Cg1647    | [M]: ABC-type multidrug transport system, permease component                                          |
| 703 | 2        | Cg1282    | [M]: conserved hypothetical protein                                                                   |
| 719 | 2        | Cg2809    | [M]: putative membrane protein                                                                        |
| 721 | 2        | Cg2535    | [S]: putative secreted protein                                                                        |
| 727 | 2        | Cg0362    | [C]: PUTATIVE SEPTUM SITE DETERMINING PROTEIN                                                         |
| 741 | 2        | Cg1623    | [M]: Predicted divalent heavy-metal cations transporter                                               |
| 743 | 2        | Cg0475    | [C]: conserved hypothetical protein                                                                   |
| 761 | 2        | Cg0064    | [C]: conserved hypothetical protein                                                                   |
| 763 | 2        | Cg3312    | [M]: putative membrane protein                                                                        |

| hit  | peptides | accession | description                                                                                |
|------|----------|-----------|--------------------------------------------------------------------------------------------|
| 765  | 2        | Cg2334    | (ilvA) [C]: THREONINE DEHYDRATASE (EC 4.2.1.16)                                            |
| 769  | 2        | Cg1806    | (metK) [C]: S-Adenosylmethionine Synthetase (EC 2.5.1.6)                                   |
| 777  | 2        | Cg2215    | [M]: putative membrane protein                                                             |
| 806  | 2        | Cg2701    | [M]: putative membrane protein                                                             |
| 822  | 2        | Cg1540    | [S]: putative secreted protein                                                             |
| 834  | 2        | Cg0759    | (prpD2) [C]: PROPIONATE CATABOLISM PROTEIN PRPD                                            |
| 856  | 2        | Cg1343    | (narH) [C]: PROBABLE RESPIRATORY NITRATE REDUCTASE OXIDOREDUCT (EC 1.7.99.4)               |
| 857  | 2        | Cg0124    | (amn) [C]: AMP NUCLEOSIDASE (EC 3.2.2.4)                                                   |
| 867  | 2        | Cg1528    | (dkgX) [C]: putative 2,5-DIKETO-D-GLUCONIC ACID REDUCTASE (EC 1.1.1.-)                     |
| 881  | 2        | Cg3119    | (cysJ) [C]: Probable Sulfite Reductase (Flavoprotein) (EC 1.8.1.2)                         |
| 884  | 2        | Cg0448    | [M]: conserved hypothetical membrane protein                                               |
| 887  | 2        | Cg0216    | [M]: hypothetical membrane protein                                                         |
| 892  | 2        | Cg0727    | [M]: nucleoside-diphosphate-sugar epimerase                                                |
| 903  | 2        | Cg2762    | (murl) [C]: GLUTAMATE RACEMASE (EC 5.1.1.3)                                                |
| 916  | 2        | Cg1128    | [MS]: similar to ribosomal protein S2                                                      |
| 953  | 2        | Cg1277    | [M]: conserved hypothetical membrane protein                                               |
| 964  | 2        | Cg1165    | [M]: Gamma-aminobutyrate permease or related permease                                      |
| 970  | 2        | Cg1865    | (secF) [M]: Preprotein translocase subunit SecF                                            |
| 971  | 2        | Cg2294    | [M]: putative membrane protein                                                             |
| 985  | 2        | Cg0534    | [M]: PUTATIVE INTEGRAL MEMBRANE PROTEIN                                                    |
| 997  | 2        | Cg0862    | (mtrA) [C]: Response regulator                                                             |
| 1042 | 2        | Cg0389    | [C]: short chain dehydrogenase                                                             |
| 1047 | 2        | Cg0092    | [M]: PUTATIVE MEMBRANE PROTEIN                                                             |
| 1123 | 2        | Cg3399    | [M]: Permease of the major facilitator superfamily                                         |
| 1194 | 2        | Cg2973    | [C]: conserved hypothetical protein                                                        |
| 1202 | 2        | Cg2457    | [C]: conserved hypothetical protein                                                        |
| 1260 | 2        | Cg1190    | [C]: hypothetical protein predicted by Glimmer/Critica                                     |
| 1267 | 2        | Cg2128    | [MS]: putative secreted or membrane protein                                                |
| 1280 | 2        | Cg2186    | [C]: conserved hypothetical protein                                                        |
| 1341 | 2        | Cg0355    | [C]: pyrophosphohydrolase                                                                  |
| 1371 | 2        | Cg3338    | [M]: putative membrane protein                                                             |
| 1419 | 2        | Cg2010    | [M]: Permease of the major facilitator superfamily                                         |
| 1462 | 2        | Cg2620    | (clpX) [C]: PROBABLE ATP-DEPENDENT PROTEASE (ATP-BINDING SPECIFICITY SUBUNIT) (EC 3.4.-.-) |
| 1464 | 2        | Cg3308    | (rpsF) [C]: RIBOSOMAL PROTEIN S6                                                           |
| 1534 | 2        | Cg2806    | [M]: putative membrane protein                                                             |
| 1550 | 2        | Cg2350    | [C]: conserved hypothetical protein                                                        |
| 1662 | 2        | Cg0530    | [M]: hypothetical protein                                                                  |
| 1801 | 2        | Cg3357    | (trpP) [M]: tryptophan-specific permease, 5-methyltryptophan resistance                    |
| 1823 | 2        | Cg2547    | [M]: putative membrane protein                                                             |
| 2249 | 2        | Cg0612    | (dkg) [C]: 2,5-DIKETO-D-GLUCONIC ACID REDUCTASE (EC 1.1.1.-)                               |

| hit  | peptides | accession | description                                                                                   |
|------|----------|-----------|-----------------------------------------------------------------------------------------------|
| 2331 | 2        | Cg2071    | (int2~) [C]: putative phage Integrase (N-terminal fragment)                                   |
| 60   | 1        | Cg2032    | [M]: putative membrane protein                                                                |
| 69   | 1        | Cg0129    | (putA) [C]: PROLINE DEHYDROGENASE/DELTA-1-PYRROLINE-5-CARBOXYLATE DEHYDROGENASE (EC 1.5.99.8) |
| 90   | 1        | Cg3178    | (pks) [C]: POLYKETIDE SYNTHASE                                                                |
| 93   | 1        | Cg1701    | (metH) [C]: Homocysteine Methyltransferase (EC 2.1.1.13)                                      |
| 102  | 1        | Cg0507    | [M]: ABC TRANSPORT SYSTEM PERMEASE PROTEIN                                                    |
| 103  | 1        | Cg3100    | (dnaK) [C]: Heat shock protein hsp70                                                          |
| 111  | 1        | Cg0015    | (gyrA) [C]: DNA TOPOISOMERASE (ATP-HYDROLYSING) (EC 5.99.1.3)                                 |
| 114  | 1        | Cg2338    | (dnaE1) [C]: PUTATIVE DNA POLYMERASE III, ALPHA CHAIN (EC 2.7.7.7)                            |
| 116  | 1        | Cg2323    | (treY) [C]: MALTOOLIGOSYL TREHALOSE SYNTHASE (EC 5.4.99.15)                                   |
| 118  | 1        | Cg3398    | [C]: DNA or RNA helicase of superfamily II                                                    |
| 122  | 1        | Cg1054    | (mmpL2) [M]: drug exporter of the RND superfamily                                             |
| 126  | 1        | Cg3125    | [M]: putative membrane protein                                                                |
| 129  | 1        | Cg3174    | (mmpL1) [M]: exporter of the MMPL family                                                      |
| 130  | 1        | Cg0845    | [C]: Superfamily II DNA/RNA helicase, SNF2 family                                             |
| 133  | 1        | Cg3419    | [M]: Uncharacterized membrane protein, virulence factor homolog                               |
| 136  | 1        | Cg1790    | (pgk) [C]: PHOSPHOGLYCERATE KINASE (EC 2.7.2.3)                                               |
| 142  | 1        | Cg1744    | (pacL) [M]: CATION-TRANSPORTING ATPASE (EC 3.6.1.)                                            |
| 157  | 1        | Cg2990    | (speE) [M]: PUTATIVE SPERMIDINE SYNTHASE TRANSMEMBRANE PROTEIN (EC 2.5.1.16)                  |
| 174  | 1        | Cg0885    | [C]: HELICASE, UVRD/REP FAMILY                                                                |
| 175  | 1        | Cg2243    | [M]: PUTATIVE DICARBOXYLASE TRANSLOCATOR                                                      |
| 176  | 1        | Cg2263    | [C]: conserved hypothetical protein                                                           |
| 177  | 1        | Cg1795    | (uvrC) [C]: Nuclease subunit of the excinuclease ABC complex                                  |
| 184  | 1        | Cg1103    | [M]: putative membrane protein                                                                |
| 198  | 1        | Cg2678    | [S]: ABC-type dipeptide/oligopeptide/nickel transport systems, secreted component             |
| 199  | 1        | Cg0972    | [M]: Cyanate permease                                                                         |
| 201  | 1        | Cg3015    | [C]: hypothetical protein predicted by Glimmer/Critica                                        |
| 206  | 1        | Cg3281    | [M]: PROBABLE CATION-TRANSPORTING ATPASE TRANSMEMBRANE PROTEIN (EC 3.6.1.-)                   |
| 214  | 1        | Cg2521    | (fadD15) [C]: LONG-CHAIN FATTY ACID COA LIGASE (EC 6.2.1.3)                                   |
| 218  | 1        | Cg3046    | (pknG) [C]: Serine/threonine protein kinase (EC 2.7.1.)                                       |
| 227  | 1        | Cg0766    | (icd) [C]: ISOCITRATE DEHYDROGENASE (EC 1.1.1.42)                                             |
| 229  | 1        | Cg2699    | [M]: putative membrane protein                                                                |
| 232  | 1        | Cg3418    | [S]: putative secreted protein                                                                |
| 242  | 1        | Cg0202    | (iolD) [C]: PUTATIVE ACETOLACTATE SYNTHASE PROTEIN (EC 4.1.3.18)                              |
| 247  | 1        | Cg1498    | [C]: RecG-like helicase                                                                       |
| 256  | 1        | Cg0934    | [C]: conserved hypothetical protein                                                           |
| 267  | 1        | Cg2840    | (actA) [C]: BUTYRYL-COA:ACETATE COENZYME A TRANSFERASE (EC 2.8.3.8)                           |
| 268  | 1        | Cg2642    | (benK1) [M]: PUTATIVE BENZOATE TRANSPORT PROTEIN                                              |
| 274  | 1        | Cg2339    | [M]: Predicted permease                                                                       |
| 280  | 1        | Cg2537    | (brnQ) [M]: Branched-Chain Amino Acid Uptake Carrier                                          |

| hit | peptides | accession | description                                                                                 |
|-----|----------|-----------|---------------------------------------------------------------------------------------------|
| 281 | 1        | Cg1709    | (cysS2) [C]: PUTATIVE CYSTEINE TRNA SYNTHETASE (EC 6.1.1.16)                                |
| 282 | 1        | Cg3096    | [C]: ALDEHYDE DEHYDROGENASE (EC 1.2.1.3)                                                    |
| 283 | 1        | Cg3387    | [M]: Permease of the major facilitator superfamily                                          |
| 292 | 1        | Cg1419    | [M]: putative Na <sup>+</sup> -dependent transporter                                        |
| 295 | 1        | Cg1787    | (ppc) [C]: PHOSPHOENOLPYRUVATE CARBOXYLASE (EC 4.1.1.31)                                    |
| 297 | 1        | Cg2125    | (uraA) [M]: PUTATIVE URACYL PERMEASE                                                        |
| 299 | 1        | Cg1234    | [C]: putative excinuclease ATPase subunit - UvrA-like protein                               |
| 301 | 1        | Cg2359    | (ileS) [C]: ISOLEUCINE-TRNA LIGASE-LIKE PROTEIN (EC 6.1.1.5)                                |
| 303 | 1        | Cg1219    | [M]: putative membrane protein                                                              |
| 304 | 1        | Cg0158    | [M]: PUTATIVE MEMBRANE TRANSPORT PROTEIN                                                    |
| 308 | 1        | Cg1784    | (ocd) [C]: PROBABLE ORNITHINE CYCLODEAMINASE PROTEIN (EC 4.3.1.12)                          |
| 309 | 1        | Cg3382    | [M]: Dipeptide/tripeptide permease                                                          |
| 311 | 1        | Cg1435    | (ilvB) [C]: ACETOLACTATE SYNTHASE (EC 4.1.3.18)                                             |
| 317 | 1        | Cg2356    | [M]: Permease of the drug/metabolite transporter (DMT) superfamily                          |
| 319 | 1        | Cg1832    | [M]: ABC-type cobalamin/Fe <sup>3+</sup> -siderophores transport system, permease component |
| 320 | 1        | Cg1768    | [M]: ABC-type multidrug transport system, permease component                                |
| 323 | 1        | Cg3101    | [M]: Predicted permease                                                                     |
| 326 | 1        | Cg1395    | [C]: conserved hypothetical protein                                                         |
| 328 | 1        | Cg1195    | [M]: Sulfate permease or related transporter (MFS superfamily)                              |
| 337 | 1        | Cg2571    | (lepA) [C]: Membrane GTPase LepA                                                            |
| 338 | 1        | Cg2419    | (pepB) [C]: LEUCINE AMINOPEPTIDASE (EC 3.4.11.1)                                            |
| 342 | 1        | Cg0886    | [C]: PROBABLE DNA HELICASE II PROTEIN (EC 3.6.1.-)                                          |
| 351 | 1        | Cg2916    | (ksdD) [MS]: 3-KETOSTEROID-1-DEHYDROGENASE (EC 1.3.99.4)                                    |
| 353 | 1        | Cg0522    | (ccsA) [M]: Cytochrome c biogenesis protein transmembrane prot                              |
| 354 | 1        | Cg3169    | (pck) [C]: PROBABLE PHOSPHOENOLPYRUVATE CARBOXYKINASE PROTEIN (EC 4.1.1.32)                 |
| 362 | 1        | Cg1121    | [M]: Permease of the major facilitator superfamily                                          |
| 369 | 1        | Cg2371    | (murD) [C]: UDP-N-ACETYLMURAMOYLALANINE D-GLUTAMATE LIGASE (EC 6.3.2.9)                     |
| 374 | 1        | Cg3248    | (cgtS11) [M]: probable two component sensor kinase                                          |
| 375 | 1        | Cg1726    | (mcmA) [C]: METHYLMALONYL-COA MUTASE SMALL SUBUNIT (EC 5.4.99.2)                            |
| 378 | 1        | Cg2147    | [M]: membrane protein, BioY family                                                          |
| 380 | 1        | Cg3157    | [S]: putative secreted protein                                                              |
| 381 | 1        | Cg1654    | (thiD1) [C]: PHOSPHOMETHYLPYRIMIDINE KINASE / HYDROXYMETHYLPYRI (EC 2.7.4.7,2.5.1.3)        |
| 387 | 1        | Cg0915    | (ftsX) [M]: PUTATIVE CELL DIVISION PROTEIN                                                  |
| 388 | 1        | Cg1090    | (ggtB) [C]: PROBABLE GAMMA-GLUTAMYLTRANSPEPTIDASE PRECURSOR PR (EC 2.3.2.2)                 |
| 394 | 1        | Cg2267    | [M]: putative membrane protein                                                              |
| 396 | 1        | Cg1526    | [M]: Permease of the major facilitator superfamily                                          |
| 399 | 1        | Cg1690    | [C]: Putative proteasome component                                                          |
| 400 | 1        | Cg0437    | [M]: membrane protein                                                                       |
| 403 | 1        | Cg0565    | [C]: PUTATIVE TRANSCRIPTIONAL REGULATOR                                                     |
| 404 | 1        | Cg3242    | [M]: putative membrane protein                                                              |

| hit | peptides | accession | description                                                                      |
|-----|----------|-----------|----------------------------------------------------------------------------------|
| 406 | 1        | Cg1959    | (priP) [C]: PROPHAGE DNA PRIMASE                                                 |
| 408 | 1        | Cg0552    | (menD) [C]: 2-OXOGLUTARATE DECARBOXYLASE (EC 4.1.1.71)                           |
| 409 | 1        | Cg2008    | [M]: putative membrane protein                                                   |
| 413 | 1        | Cg2833    | (cysK) [C]: O-Acetylserine (Thiol)-Lyase (EC 4.2.99.8)                           |
| 424 | 1        | Cg0808    | (wbpC) [M]: LIPOPOLYSACCHARIDE BIOSYNTHESIS ACYLTRANSFERASE, m                   |
| 425 | 1        | Cg0375    | (cyaB) [M]: putative ADENYLATE CYCLASE (EC 4.6.1.1)                              |
| 426 | 1        | Cg0887    | [M]: Kef-type K <sup>+</sup> transport systems, predicted NAD-binding component  |
| 427 | 1        | Cg2109    | (oxyR) [C]: HYDROGEN PEROXIDE SENSING REGULATOR                                  |
| 428 | 1        | Cg0318    | (arsC1) [M]: PUTATIVE HEAVY METAL RESISTANCE MEMBRANE PROTEIN                    |
| 435 | 1        | Cg2557    | [M]: Predicted Na <sup>+</sup> -dependent transporter                            |
| 441 | 1        | Cg1341    | (narI) [M]: RESPIRATORY NITRATE REDUCTASE 2 GAMMA CHAIN (EC 1.7.99.4)            |
| 442 | 1        | Cg3322    | [S]: putative secreted membrane-fusion protein                                   |
| 445 | 1        | Cg1774    | (tkt) [C]: TRANSKETOLASE (EC 2.2.1.1)                                            |
| 447 | 1        | Cg0623    | [M]: cobalt transport system, permease component                                 |
| 449 | 1        | Cg1737    | (acn) [C]: ACONITASE (EC 4.2.1.3)                                                |
| 456 | 1        | Cg1411    | [C]: ABC-type sugar (aldose) transport system, ATPase component                  |
| 462 | 1        | Cg1451    | (serA) [C]: Phosphoglycerate Dehydrogenase (EC 1.1.1.95)                         |
| 465 | 1        | Cg3153    | [M]: putative membrane protein                                                   |
| 466 | 1        | Cg2673    | [M]: Permease of the major facilitator superfamily                               |
| 467 | 1        | Cg0755    | (metY) [C]: O-Acetylhomoserine (Thiol)-Lyase (EC 4.2.99.10)                      |
| 468 | 1        | Cg0997    | (cgtS2) [M]: probable two component sensor kinase                                |
| 470 | 1        | Cg2314    | [S]: transcriptional regulator, Lacl family                                      |
| 478 | 1        | Cg2610    | [S]: ABC-type dipeptide/oligopeptide/nickel transport system, secreted component |
| 481 | 1        | Cg2206    | (ispG) [C]: involved in the nonmevalonate pathway of terpenoid biosynthesis      |
| 483 | 1        | Cg0370    | [C]: DEAD/DEAH box helicase                                                      |
| 487 | 1        | Cg2001    | [C]: conserved hypothetical protein                                              |
| 493 | 1        | Cg0195    | [M]: membrane protein                                                            |
| 506 | 1        | Cg0688    | [C]: Uncharacterized protein family UPF0031                                      |
| 512 | 1        | Cg0340    | [M]: PUTATIVE INTEGRAL MEMBRANE TRANSPORT PROTEIN                                |
| 519 | 1        | Cg2598    | [M]: putative membrane protein                                                   |
| 522 | 1        | Cg0083    | [M]: mononucleotide transporter                                                  |
| 524 | 1        | Cg2292    | (lgt) [M]: PUTATIVE PROLIPOPROTEIN DIACYLGLYCEROL TRANSFERASE (EC 2.4.99.)       |
| 525 | 1        | Cg3017    | [M]: putative membrane protein                                                   |
| 531 | 1        | Cg1578    | [M]: Acyltransferase family, membrane protein                                    |
| 535 | 1        | Cg2369    | (murG) [C]: peptidoglycan biosynthesis protein (EC 2.4.1.-)                      |
| 537 | 1        | Cg1855    | (hisS) [C]: HISTIDYL-TRNA SYNTHETASE (EC 6.1.1.21)                               |
| 543 | 1        | Cg2559    | (aceB) [C]: MALATE SYNTHASE (EC 4.1.3.2)                                         |
| 544 | 1        | Cg2289    | (glgP2) [C]: ALPHA-GLUCAN PHOSPHORYLASE, GLYCOGEN PHOSPHORYLASE (EC 2.4.1.1)     |
| 552 | 1        | Cg2390    | [M]: putative membrane protein                                                   |
| 553 | 1        | Cg1569    | (ugpE) [M]: sn-glycerol-3-phosphate transport system permease protein            |

| hit | peptides | accession | description                                                                                                     |
|-----|----------|-----------|-----------------------------------------------------------------------------------------------------------------|
| 561 | 1        | Cg1353    | (fadD4) [C]: ACYL-COA SYNTHETASE (EC 6.2.1.3)                                                                   |
| 565 | 1        | Cg0824    | (tnp5a(ISCg5a)) [C]: Transposase                                                                                |
| 569 | 1        | Cg0701    | [M]: drug/metabolite transporter DMT superfamily                                                                |
| 572 | 1        | Cg0025    | [M]: (Q93JD3) PUTATIVE INTEGRAL MEMBRANE CYTOCHROME BIO                                                         |
| 573 | 1        | Cg1101    | [M]: ABC-type multidrug/protein/lipid transport system, membrane component                                      |
| 578 | 1        | Cg1274    | (mrp) [C]: ATPases involved in chromosome partitioning                                                          |
| 579 | 1        | Cg0444    | (ramB) [C]: transcriptional regulator, MerR family                                                              |
| 580 | 1        | Cg0948    | (serC) [C]: Phosphoserine Transaminase (EC 2.6.1.52)                                                            |
| 581 | 1        | Cg1609    | [C]: ATPase component of ABC transporter with duplicated ATPase domains                                         |
| 583 | 1        | Cg0776    | [S]: ABC-type cobalamin/Fe3+-siderophores transport system, secreted component                                  |
| 584 | 1        | Cg0042    | [M]: ABC TRANSPORTER PROTEIN, INTEGRAL MEMBRANE SUBUNIT                                                         |
| 586 | 1        | Cg2524    | [M]: putative BETA (1-->2) GLUCAN EXPORT COMPOSITE TRANSMEMBRANE/ATP-BINDING PROTEIN                            |
| 589 | 1        | Cg2878    | (purD) [C]: PHOSPHORIBOSYLAMINE-GLYCINE LIGASE (EC 6.3.4.13)                                                    |
| 591 | 1        | Cg0397    | [M]: PROBABLE 5~-NUCLEOTIDASE PRECURSOR (EC 3.1.3.5)                                                            |
| 593 | 1        | Cg0648    | (adk) [C]: ADENYLATE KINASE (EC 2.7.4.3)                                                                        |
| 596 | 1        | Cg1669    | [S]: putative secreted protein                                                                                  |
| 598 | 1        | Cg1292    | [S]: FLAVIN-CONTAINING MONOOXYGENASE 3 (EC 1.14.13.8)                                                           |
| 599 | 1        | Cg2447    | (glnA2) [C]: GLUTAMINE SYNTHETASE 2 (EC 6.3.1.2)                                                                |
| 604 | 1        | Cg2731    | (uxaC) [C]: PUTATIVE GLUCURONATE ISOMERASE (EC 5.3.1.12)                                                        |
| 608 | 1        | Cg1802    | (fmu) [C]: PUTATIVE 16S RRNA M(5)C 967 METHYLTRANSFERASE (EC 2.1.1.-)                                           |
| 611 | 1        | Cg0363    | [C]: PROBABLE SECRETION ATPASE PROTEIN                                                                          |
| 613 | 1        | Cg2511    | [M]: putative membrane protein containing CBS domain                                                            |
| 614 | 1        | Cg2421    | (sucB) [C]: DIHYDROLIPOAMIDE SUCCINYLTRANSFERASE (EC 2.3.1.61)                                                  |
| 615 | 1        | Cg1164    | (lytB) [C]: Penicillin tolerance protein                                                                        |
| 617 | 1        | Cg1307    | [C]: Superfamily II DNA and RNA helicase                                                                        |
| 623 | 1        | Cg2611    | (hscA) [C]: Molecular chaperone, HSP70 family                                                                   |
| 626 | 1        | Cg0554    | [C]: GLYCOSYL TRANSFERASE                                                                                       |
| 628 | 1        | Cg1904    | [M]: putative membrane protein                                                                                  |
| 629 | 1        | Cg3042    | [C]: ABC-type multidrug transport system, ATPase component                                                      |
| 631 | 1        | Cg2970    | [C]: conserved hypothetical protein                                                                             |
| 635 | 1        | Cg3362    | (trpCF) [C]: INDOLE-3-GGLYCEROL-PHOSPHATE SYNTHASE/PHOSPHORIBOSYLANTHRANILATE ISOMERASE (EC 4.1.1.48, 5.3.1.24) |
| 637 | 1        | Cg1798    | (ribA) [C]: PUTATIVE GTP CYCLOHYDROLASE II/3,4-DIHYDROXY-2-BUTANONE-4-PHOSPHATESYNTHASE (EC 3.5.4.25)           |
| 639 | 1        | Cg2397    | [M]: putative membrane protein                                                                                  |
| 641 | 1        | Cg2796    | [C]: MMGE/PRPD FAMILY PROTEIN                                                                                   |
| 644 | 1        | Cg0308    | [M]: putative membrane protein                                                                                  |
| 646 | 1        | Cg3114    | (cysN) [C]: Sulfate Adenylyltransferase Subunit 1 (EC 2.7.7.4)                                                  |
| 648 | 1        | Cg0794    | [C]: Cobalamin synthesis protein/P47K                                                                           |
| 658 | 1        | Cg2304    | (hisC) [C]: PROBABLE HISTIDINOL-PHOSPHATE AMINOTRANSFERASE (EC 2.6.1.9)                                         |
| 663 | 1        | Cg0559    | (ispB) [C]: PUTATIVE OCTAPRENYL-DIPHOSPHATE SYNTHASE PROTEIN ( (EC 2.5.1.)                                      |
| 664 | 1        | Cg1527    | [C]: transcriptional regulator                                                                                  |

| hit | peptides | accession | description                                                                      |
|-----|----------|-----------|----------------------------------------------------------------------------------|
| 671 | 1        | Cg2776    | (dinG) [C]: PROBABLE ATP-DEPENDENT DNA HELICASE-RELATED PROTEIN (EC 3.6.1.-)     |
| 676 | 1        | Cg1163    | (xseA) [C]: EXODEOXYRIBONUCLEASE VII LARGE SUBUNIT (EC 3.1.1.11.6)               |
| 677 | 1        | Cg2194    | (gor) [C]: PUTATIVE GLUTATHIONE REDUCTASE (EC 1.6.4.2)                           |
| 681 | 1        | Cg0400    | (adhC) [C]: ALCOHOL DEHYDROGENASE, CLASS C (EC 1.1.1.2)                          |
| 682 | 1        | Cg1697    | (aspA) [C]: ASPARTATE AMMONIA-LYASE (ASPARTASE) (EC 4.3.1.1)                     |
| 685 | 1        | Cg1089    | [M]: ABC-type multidrug/protein/lipid transport system, ATPase component         |
| 686 | 1        | Cg1466    | [S]: putative secreted protein                                                   |
| 688 | 1        | Cg1434    | (yggB) [M]: Small-conductance mechanosensitive channel                           |
| 696 | 1        | Cg0783    | [C]: conserved hypothetical protein                                              |
| 697 | 1        | Cg0041    | [S]: PUTATIVE SOLUTE-BINDING LIPOPROTEIN, signal peptid                          |
| 704 | 1        | Cg2856    | (purM) [C]: PHOSPHORIBOSYL AMINOIMIDAZOLE SYNTHETASE (EC 6.3.3.1)                |
| 707 | 1        | Cg1582    | (argB) [C]: ACETYLGLUTAMATE KINASE (EC 2.7.2.8)                                  |
| 709 | 1        | Cg2550    | [M]: ABC-type dipeptide/oligopeptide/nickel transport system, permease component |
| 713 | 1        | Cg2208    | (dxr) [S]: PROBABLE 1-DEOXY-D-XYLULOSE 5-PHOSPHATE REDUCTOISOMERASE (EC 1.1.1.1) |
| 717 | 1        | Cg2504    | [C]: conserved hypothetical protein                                              |
| 723 | 1        | Cg0221    | [C]: PROBABLE LACI-FAMILY TRANSCRIPTIONAL REGULATOR                              |
| 726 | 1        | Cg2659    | [M]: putative membrane protein                                                   |
| 728 | 1        | Cg1753    | [C]: ATPase component of ABC transporters with duplicated ATPase domains         |
| 729 | 1        | Cg0524    | (ccsB) [M]: Cytochrome c assembly membrane protein                               |
| 730 | 1        | Cg2485    | (phoD) [S]: SECRETED ALKALINE PHOSPHATASE PRECURSOR (EC 3.1.3.1)                 |
| 733 | 1        | Cg0873    | (aroA) [C]: 3-PHOSPHOSHIKIMATE 1-CARBOXYVINYLTRANSFERASE (EC 2.5.1.19)           |
| 734 | 1        | Cg1794    | [C]: Uncharacterised P-loop ATPase protein                                       |
| 735 | 1        | Cg0062    | (ppp) [M]: PROTEIN PHOSPHATASE (EC 3.1.3.16)                                     |
| 737 | 1        | Cg0123    | [C]: PUTATIVE HEAT SHOCK PROTEIN (HSP90-FAMILY)                                  |
| 740 | 1        | Cg1503    | [M]: ABC-type amino acid transport system, permease component                    |
| 746 | 1        | Cg3197    | (psp5) [S]: Putative secreted protein                                            |
| 750 | 1        | Cg1776    | (tal) [C]: TRANSALDOLASE (EC 2.2.1.2)                                            |
| 755 | 1        | Cg0007    | (gyrB) [C]: DNA GYRASE SUBUNIT B (EC 5.99.1.3)                                   |
| 756 | 1        | Cg1452    | [C]: hypothetical protein predicted by Glimmer/Critica                           |
| 760 | 1        | Cg1836    | [S]: secreted solute-binding protein, aminodeoxychorismate lyase-like            |
| 762 | 1        | Cg0198    | [C]: conserved hypothetical protein                                              |
| 767 | 1        | Cg1648    | [C]: transcriptional regulator, rpiR family                                      |
| 774 | 1        | Cg2418    | (ilvE) [C]: BRANCHED-CHAIN AMINO ACID AMINOTRANSFERASE (EC 2.6.1.42)             |
| 781 | 1        | Cg1727    | [M]: putative membrane protein                                                   |
| 782 | 1        | Cg0510    | (hemD) [C]: UROPORPHYRINOGEN III SYNTHASE/METHYLTRANSFERASE (EC 4.2.1.75)        |
| 784 | 1        | Cg1713    | (pyrD) [C]: DIHYDROOROTATE DEHYDROGENASE (EC 1.3.3.1)                            |
| 791 | 1        | Cg3134    | [M]: ABC-type cobalt transport system, permease component                        |
| 792 | 1        | Cg2767    | [M]: membrane protein (homolog of Drosophila rhomboid)                           |
| 798 | 1        | Cg2313    | (idhA3) [C]: MYO-INOSITOL 2-DEHYDROGENASE (EC 1.1.1.18)                          |
| 802 | 1        | Cg0531    | (menA) [M]: 1,4-DIHYDROXY-2-NAPHTHOATE OCTAPRENYLTRANSFERASE (EC 2.5.1.-)        |

| hit | peptides | accession | description                                                                         |
|-----|----------|-----------|-------------------------------------------------------------------------------------|
| 804 | 1        | Cg1761    | (nifS2) [C]: CYSTEINE DESULFHYDRASE / SELENOCYSTEINE LYASE (EC 4.4.1.-)             |
| 805 | 1        | Cg2896    | [S]: putative secreted protein, hypothetical endoglucanase                          |
| 816 | 1        | Cg3190    | [C]: Membrane-associated phospholipid phosphatase                                   |
| 817 | 1        | Cg0045    | [M]: PROBABLE ABC TRANSPORT PROTEIN, MEMBRANE COMPONENT                             |
| 825 | 1        | Cg3047    | (ackA) [C]: ACETATE KINASE (EC 2.7.2.1)                                             |
| 830 | 1        | Cg0412    | [M]: membrane protein                                                               |
| 831 | 1        | Cg0193    | (pepO) [C]: ENDOPEPTIDASE O (EC 3.4.24.)                                            |
| 832 | 1        | Cg0265    | [C]: ABC TRANSPORTER ATP-BINDING PROTEIN                                            |
| 840 | 1        | Cg2836    | (sucD) [C]: SUCCINYL-COA SYNTHETASE ALPHA SUBUNIT (EC 6.2.1.5)                      |
| 841 | 1        | Cg0296    | (dnaZX) [C]: DNA POLYMERASE III GAMMA AND TAU SUBUNITS (EC 2.7.7.7)                 |
| 846 | 1        | Cg2498    | [M]: conserved hypothetical protein                                                 |
| 847 | 1        | Cg2255    | [M]: ABC-type multidrug transport system, permease component                        |
| 848 | 1        | Cg3106    | [C]: conserved hypothetical protein                                                 |
| 854 | 1        | Cg0778    | [M]: ABC-type cobalamin/Fe3+-siderophores transport system, permease component      |
| 859 | 1        | Cg1696    | [M]: Permease of the major facilitator superfamily                                  |
| 864 | 1        | Cg0928    | [C]: ABC-type cobalamin/Fe3+-siderophores transport system, ATPase component        |
| 865 | 1        | Cg3403    | [M]: Permease of the major facilitator superfamily                                  |
| 866 | 1        | Cg0368    | [S]: conserved secreted protein                                                     |
| 868 | 1        | Cg0143    | (mtlD) [C]: MANNITOL 2-DEHYDROGENASE (EC 1.1.1.67)                                  |
| 869 | 1        | Cg2135    | (miaB) [C]: TRNA METHYLTHIOTRANSFERASE                                              |
| 872 | 1        | Cg2784    | [C]: metal-dependent transcriptional regulator                                      |
| 883 | 1        | Cg3396    | [C]: Membrane protease subunit, stomatin/prohibitin homologs                        |
| 885 | 1        | Cg0167    | [M]: permease                                                                       |
| 889 | 1        | Cg0945    | [C]: 23S RIBOSOMAL RNA METHYLTRANSFERASE (EC 2.1.1.-)                               |
| 893 | 1        | Cg1166    | [M]: putative membrane protein                                                      |
| 907 | 1        | Cg2374    | (murE) [C]: PROBABLE UDP-N-ACETYLMURAMOYLALANYL-D-GLUTAMATE--2 (EC 6.3.2.13)        |
| 919 | 1        | Cg1298    | (cydC) [M]: ABC-type multidrug/protein/lipid transport system, ATPase component     |
| 929 | 1        | Cg0422    | (murA) [C]: UDP-N-ACETYLGUCOSAMINE 1-CARBOXYVINYLTRANSFERASE (EC 2.5.1.7)           |
| 932 | 1        | Cg1458    | [C]: 2-HYDROXYHEPTA-2,4-DIENE- 1,7-DIOATE ISOMERASE (EC 5.3.3.-)                    |
| 934 | 1        | Cg0263    | (modA) [S]: MOLYBDATE-BINDING secreted PROTEIN                                      |
| 935 | 1        | Cg0405    | [S]: cobalamin/Fe3+-siderophores transport system, secreted component               |
| 940 | 1        | Cg3177    | (pccB) [C]: PROPIONYL-COA CARBOXYLASE BETA CHAIN (EC 6.4.1.3)                       |
| 942 | 1        | Cg0624    | [M]: secreted oxidoreductase                                                        |
| 947 | 1        | Cg3426    | (parB) [C]: Predicted transcriptional regulator involved in chromosome partitioning |
| 949 | 1        | Cg3133    | [C]: ABC-type cobalt transport system, ATPase component                             |
| 957 | 1        | Cg3336    | (gntK) [C]: PUTATIVE GLUCONATE KINASE (EC 2.7.1.12)                                 |
| 958 | 1        | Cg2908    | [S]: putative membrane protein                                                      |
| 962 | 1        | Cg1890    | [C]: hypothetical protein predicted by Glimmer/Critica                              |
| 965 | 1        | Cg2549    | [S]: ABC-type dipeptide/oligopeptide/nickel transport system, secreted component    |
| 968 | 1        | Cg1369    | (atpC) [C]: PROBABLE ATP SYNTHASE EPSILON CHAIN PROTEIN (EC 3.6.1.34)               |



| hit  | peptides | accession | description                                                                                   |
|------|----------|-----------|-----------------------------------------------------------------------------------------------|
| 969  | 1        | Cg1482    | [C]: Zn-dependent hydrolases, including glyoxylases                                           |
| 981  | 1        | Cg3389    | [C]: Predicted dehydrogenase                                                                  |
| 994  | 1        | Cg1035    | [C]: TatD related DNase                                                                       |
| 1001 | 1        | Cg3407    | [M]: putative membrane protein                                                                |
| 1005 | 1        | Cg1649    | (pctD) [M]: ABC-type phosphate/phosphonate transport system, permease component               |
| 1010 | 1        | Cg0091    | [C]: D-isomer specific 2-hydroxyacid dehydrogenase                                            |
| 1011 | 1        | Cg0932    | [M]: membrane protein                                                                         |
| 1018 | 1        | Cg1104    | [M]: Predicted esterase, membrane protein                                                     |
| 1019 | 1        | Cg2900    | (ddh) [C]: MESO-DIAMINOPIMELATE DEHYDROGENASE (EC 1.4.1.16)                                   |
| 1021 | 1        | Cg0244    | [M]: membrane protein                                                                         |
| 1025 | 1        | Cg3170    | [M]: Tellurite resistance protein or related permease                                         |
| 1028 | 1        | Cg0010    | [C]: conserved hypothetical protein                                                           |
| 1029 | 1        | Cg2938    | [M]: ABC-type dipeptide/oligopeptide/nickel transport system, permease component              |
| 1033 | 1        | Cg1122    | [S]: putative secreted protein                                                                |
| 1038 | 1        | Cg2160    | [C]: HYDROLASE OF METALLO-BETA-LACTAMASE SUPERFAMILY                                          |
| 1039 | 1        | Cg0742    | [M]: PUTATIVE INTEGRAL MEMBRANE PROTEIN                                                       |
| 1040 | 1        | Cg0291    | [C]: 3,4-dioxygenase beta subunit                                                             |
| 1051 | 1        | Cg0472    | [C]: conserved hypothetical protein                                                           |
| 1055 | 1        | Cg2955    | (mutY) [C]: A/G-SPECIFIC ADENINE GLYCOSYLASE (EC 3.2.2.-)                                     |
| 1060 | 1        | Cg2994    | [S]: putative secreted or membrane protein                                                    |
| 1061 | 1        | Cg2894    | [C]: Bacterial regulatory protein, TetR family                                                |
| 1062 | 1        | Cg2342    | [C]: Dehydrogenase                                                                            |
| 1064 | 1        | Cg1522    | [M]: putative membrane protein                                                                |
| 1065 | 1        | Cg3163    | [M]: PROBABLE ACYLTRANSFERASE (EC 2.3.1.-)                                                    |
| 1076 | 1        | Cg0879    | [M]: membrane protein                                                                         |
| 1077 | 1        | Cg3116    | (cysH) [C]: Phosphoadenosine-Phosphosulfate Reductase (EC 1.8.99.4)                           |
| 1080 | 1        | Cg3316    | [C]: Universal stress protein UspA or related nucleotide-binding protein                      |
| 1087 | 1        | Cg0230    | (gltD) [C]: (Q9Z464) GLUTAMINE 2-OXOGLUTARATE AMINOTRANSFERASE (EC 1.4.1.13)                  |
| 1090 | 1        | Cg3264    | [C]: conserved hypothetical protein                                                           |
| 1101 | 1        | Cg1226    | (pobB) [C]: 4-HYDROXYBENZOATE 3-MONOOXYGENASE (EC 1.14.13.2)                                  |
| 1104 | 1        | Cg0001    | (dnaA) [C]: CHROMOSOMAL REPLICATION INITIATOR PROTEIN                                         |
| 1107 | 1        | Cg1002    | [S]: putative secreted protein                                                                |
| 1112 | 1        | Cg2127    | [C]: conserved hypothetical protein                                                           |
| 1117 | 1        | Cg2049    | [C]: hypothetical protein predicted by Glimmer/Critica                                        |
| 1129 | 1        | Cg3025    | (mrpC) [M]: MULTISUBUNIT NA <sup>+</sup> /H <sup>+</sup> ANTIporter INVOLVED IN PH REGULATION |
| 1134 | 1        | Cg0970    | [M]: membrane protein                                                                         |
| 1137 | 1        | Cg0432    | [M]: PROBABLE LIPOPOLYSACCHARIDE MODIFICATION ACYLTRANS                                       |
| 1141 | 1        | Cg0523    | [M]: membrane protein required for cytochrome c biosynthesis                                  |
| 1145 | 1        | Cg2510    | (bex) [C]: BEX PROTEIN (GTP-BINDING PROTEIN ERA HOMOLOG)                                      |
| 1147 | 1        | Cg1799    | (ribC) [C]: PUTATIVE RIBOFLAVIN SYNTHASE (EC 2.5.1.9)                                         |

| hit  | peptides | accession | description                                                                                                                   |
|------|----------|-----------|-------------------------------------------------------------------------------------------------------------------------------|
| 1151 | 1        | Cg2114    | (lexA) [C]: PUTATIVE LEXA REPRESSOR TRANSCRIPTION REGULATOR PROTEIN (EC 3.4.21.88)                                            |
| 1156 | 1        | Cg2410    | (ltsA) [C]: glutamine-dependent amidotransferase involved in formation of cell wall and L-glutamate biosynthesis (EC 6.3.5.4) |
| 1159 | 1        | Cg2650    | [M]: putative membrane protein                                                                                                |
| 1166 | 1        | Cg1051    | [C]: hypothetical protein predicted by Glimmer/Critica                                                                        |
| 1167 | 1        | Cg0401    | (rmlA1) [C]: TDP-GLUCOSE PYROPHOSPHORYLASE (EC 2.7.7.24)                                                                      |
| 1172 | 1        | Cg2936    | [C]: Bacterial regulatory proteins, GntR family                                                                               |
| 1176 | 1        | Cg1129    | (aroF) [C]: PROBABLE PHOSPHO-2-DEHYDRO-3-DEOXYHEPTONATE ALDOLASE (EC 4.1.2.15)                                                |
| 1180 | 1        | Cg2402    | [S]: NPL/P60 FAMILY SECRETED PROTEIN                                                                                          |
| 1185 | 1        | Cg2554    | (rbsK2) [C]: PROBABLE RIBOKINASE PROTEIN (EC 2.7.1.15)                                                                        |
| 1186 | 1        | Cg2286    | [M]: putative membrane protein                                                                                                |
| 1187 | 1        | Cg2482    | [C]: hypothetical protein predicted by Glimmer/Critica                                                                        |
| 1199 | 1        | Cg2664    | [C]: Predicted type IV restriction endonuclease                                                                               |
| 1203 | 1        | Cg2429    | (glnA) [C]: GLUTAMINE SYNTHETASE I (EC 6.3.1.2)                                                                               |
| 1205 | 1        | Cg1355    | (prfA) [C]: PEPTIDE CHAIN RELEASE FACTOR 1 (RF-1)                                                                             |
| 1211 | 1        | Cg2022    | [MS]: putative secreted protein                                                                                               |
| 1215 | 1        | Cg2318    | [S]: ABC-type cobalamin/Fe3+-siderophores transport system component                                                          |
| 1219 | 1        | Cg2271    | [M]: Co/Zn/Cd efflux system component                                                                                         |
| 1221 | 1        | Cg0352    | [S]: putative secreted protein                                                                                                |
| 1223 | 1        | Cg0310    | (katA) [C]: CATALASE (EC 1.11.1.6)                                                                                            |
| 1225 | 1        | Cg1881    | [S]: Predicted iron-dependent peroxidase, secreted protein                                                                    |
| 1234 | 1        | Cg2348    | [S]: putative secreted protein                                                                                                |
| 1236 | 1        | Cg1568    | (ugpA) [M]: sn-Glycerol-3-phosphate transport system permease protein                                                         |
| 1247 | 1        | Cg1494    | [S]: putative secreted protein                                                                                                |
| 1251 | 1        | Cg1733    | [C]: conserved hypothetical protein                                                                                           |
| 1259 | 1        | Cg0649    | (map1) [C]: METHIONINE AMINOPEPTIDASE (EC 3.4.11.18)                                                                          |
| 1262 | 1        | Cg2000    | [M]: putative membrane protein                                                                                                |
| 1263 | 1        | Cg1158    | [S]: putative secreted protein                                                                                                |
| 1269 | 1        | Cg1859    | [S]: putative secreted protein                                                                                                |
| 1270 | 1        | Cg3099    | (grpE) [C]: Molecular chaperone GrpE (heat shock protein)                                                                     |
| 1288 | 1        | Cg2226    | [C]: Predicted Rossmann fold nucleotide-binding protein involved in DNA uptake                                                |
| 1290 | 1        | Cg0786    | (upp) [C]: PUTATIVE URACIL PHOSPHORIBOSYLTRANSFERASE (EC 2.4.2.9)                                                             |
| 1301 | 1        | Cg0353    | (nth) [C]: PROBABLE ENDONUCLEASE III PROTEIN (EC 4.2.99.18)                                                                   |
| 1303 | 1        | Cg1300    | (cydB) [M]: CYTOCHROME D TERMINAL OXIDASE POLYPEPTIDE SUBUNIT (EC 1.10.3.-)                                                   |
| 1313 | 1        | Cg0899    | [C]: glutamine amidotransferase involved in pyridoxine biosynthesis                                                           |
| 1317 | 1        | Cg0237    | [C]: PUTATIVE OXIDOREDUCTASE                                                                                                  |
| 1318 | 1        | Cg3172    | [C]: SAM-dependent methyltransferase                                                                                          |
| 1322 | 1        | Cg2517    | (hemN) [C]: PUTATIVE ANAEROBIC COPROPORPHYRINOGEN III OXIDASE (EC 1.3.3.3)                                                    |
| 1327 | 1        | Cg1738    | [C]: (AAK45786) TRANSCRIPTIONAL REGULATOR, TETR FAMILY                                                                        |
| 1332 | 1        | Cg0596    | (rplD) [C]: 50S RIBOSOMAL PROTEIN L4                                                                                          |
| 1337 | 1        | Cg2428    | [M]: putative membrane protein                                                                                                |

| hit  | peptides | accession | description                                                              |
|------|----------|-----------|--------------------------------------------------------------------------|
| 1340 | 1        | Cg0721    | (crtB2) [C]: PHYTOENE SYNTHETASE (EC 2.5.1.)                             |
| 1343 | 1        | Cg2977    | [M]: putative membrane protein                                           |
| 1345 | 1        | Cg0046    | [C]: PROBABLE ABC TRANSPORT PROTEIN, ATP-BINDING COMPON                  |
| 1346 | 1        | Cg1811    | (ihf) [C]: putative integration host factor cIHF                         |
| 1350 | 1        | Cg0548    | (menB) [C]: DIHYDROXYNAPHTHONIC ACID SYNTHASE (EC 4.1.3.36)              |
| 1354 | 1        | Cg1180    | [M]: Glycosyltransferases, probably involved in cell wall biogenesis     |
| 1370 | 1        | Cg0330    | (cgtR1) [C]: PUTATIVE TWO COMPONENT RESPONSE REGULATOR                   |
| 1372 | 1        | Cg3317    | [M]: putative membrane protein                                           |
| 1375 | 1        | Cg0562    | (nusG) [C]: TRANSCRIPTION ANTITERMINATION PROTEIN NUSG                   |
| 1378 | 1        | Cg0128    | [S]: secreted protein, Signal peptide                                    |
| 1381 | 1        | Cg0696    | (sigD) [C]: PUTATIVE RNA POLYMERASE SIGMA FACTOR, ECF family             |
| 1397 | 1        | Cg1056    | [M]: putative membrane protein                                           |
| 1398 | 1        | Cg2099    | [M]: putative membrane protein                                           |
| 1402 | 1        | Cg3214    | [C]: conserved hypothetical protein                                      |
| 1407 | 1        | Cg0684    | (papA) [C]: PROLYL AMINOPEPTIDASE A (EC 3.4.11.5)                        |
| 1414 | 1        | Cg1405    | [C]: Siderophore-interacting protein                                     |
| 1418 | 1        | Cg1242    | [M]: putative membrane protein                                           |
| 1421 | 1        | Cg1260    | (dapE) [C]: SUCCINYL-DIAMINOPIMELATE DESUCCINYLAASE (EC 3.5.1.18)        |
| 1429 | 1        | Cg0602    | (rpIP) [C]: 50S RIBOSOMAL PROTEIN L16                                    |
| 1430 | 1        | Cg3299    | (trxB1) [C]: THIOREDOXIN                                                 |
| 1431 | 1        | Cg2578    | [MS]: secreted DNA uptake protein or related DNA-binding protein         |
| 1433 | 1        | Cg1236    | (tpx) [C]: THIOL PEROXIDASE (EC 1.11.1.-)                                |
| 1437 | 1        | Cg1291    | [M]: putative membrane protein                                           |
| 1442 | 1        | Cg2625    | (pcaF) [C]: PUTATIVE ACETYL-COA:ACETYLTRANSFERASE (EC 2.3.1.9)           |
| 1447 | 1        | Cg3211    | [S]: putative secreted protein                                           |
| 1456 | 1        | Cg1490    | [C]: NTP pyrophosphohydrolases including oxidative damage repair enzymes |
| 1459 | 1        | Cg2935    | (nanP) [C]: NEURAMINIDASE NANP                                           |
| 1467 | 1        | Cg0153    | (hde) [C]: PROBABLE ESTERASE/LIPASE PROTEIN (EC 3.1.1.-)                 |
| 1468 | 1        | Cg1176    | [C]: short chain dehydrogenase                                           |
| 1476 | 1        | Cg0154    | [C]: haloacid dehalogenase-like hydrolase                                |
| 1479 | 1        | Cg0650    | [S]: secreted protein                                                    |
| 1488 | 1        | Cg1675    | [M]: putative membrane protein                                           |
| 1498 | 1        | Cg0156    | [C]: Bacterial regulatory proteins, Crp family                           |
| 1505 | 1        | Cg1206    | [C]: PEP phosphonomutase or related enzyme                               |
| 1506 | 1        | Cg1842    | [S]: putative secreted metalloprotease                                   |
| 1508 | 1        | Cg1962    | [M]: putative membrane protein                                           |
| 1509 | 1        | Cg2952    | [S]: putative secreted protein                                           |
| 1523 | 1        | Cg0946    | [C]: conserved hypothetical protein                                      |
| 1532 | 1        | Cg2567    | [C]: hypothetical protein predicted by Glimmer/Critica                   |
| 1539 | 1        | Cg0109    | [C]: TRIACYLGLYCEROL LIPASE PRECURSOR (EC 3.1.1.3)                       |

| hit  | peptides | accession | description                                                                                |
|------|----------|-----------|--------------------------------------------------------------------------------------------|
| 1542 | 1        | Cg3209    | [M]: Predicted metal-dependent membrane protease                                           |
| 1547 | 1        | Cg0620    | [S]: secreted protein                                                                      |
| 1549 | 1        | Cg2134    | [M]: putative membrane protein                                                             |
| 1565 | 1        | Cg3155    | (dcd) [C]: DEOXYCYTIDINE TRIPHOSPHATE DEAMINASE (EC 3.5.4.13)                              |
| 1568 | 1        | Cg0680    | [C]: conserved hypothetical protein                                                        |
| 1571 | 1        | Cg1514    | [S]: secreted protein                                                                      |
| 1572 | 1        | Cg3277    | [C]: Uncharacterized ACR, double-stranded beta-helix domain                                |
| 1579 | 1        | Cg1370    | [MS]: conserved hypothetical protein                                                       |
| 1584 | 1        | Cg3249    | [S]: putative secreted protein                                                             |
| 1585 | 1        | Cg2720    | (lppS) [S]: secreted lipoprotein ErfK/YbiS/YcfS/YnhG family                                |
| 1590 | 1        | Cg3280    | [S]: putative secreted protein                                                             |
| 1605 | 1        | Cg0179    | [M]: membrane protein                                                                      |
| 1617 | 1        | Cg3293    | [C]: hypothetical protein predicted by Glimmer/Critica                                     |
| 1634 | 1        | Cg0325    | [M]: Na <sup>+</sup> /H <sup>+</sup> antiporter                                            |
| 1643 | 1        | Cg0415    | (ptpA2) [C]: Low molecular weight phosphotyrosine protein phosph                           |
| 1645 | 1        | Cg1597    | [C]: conserved hypothetical protein                                                        |
| 1649 | 1        | Cg1033    | [M]: Cadmium resistance transporter                                                        |
| 1650 | 1        | Cg2623    | (scoA) [C]: PROBABLE FESUCCINYL-COA:3-KETOACID-COENZYME A TRANSFERASE SUBUNIT (EC 2.8.3.5) |
| 1670 | 1        | Cg0795    | [MS]: FAD-dependent pyridine nucleotide-disulphide oxidoreductase                          |
| 1675 | 1        | Cg0292    | (tnp16a(ISCg16a)) [C]: TRANSPOSASE                                                         |
| 1681 | 1        | Cg1893    | [C]: acetyltransferase                                                                     |
| 1696 | 1        | Cg2113    | [C]: hypothetical protein predicted by Glimmer/Critica                                     |
| 1699 | 1        | Cg2315    | [C]: ABC-type cobalamin/Fe <sup>3+</sup> -siderophores transport systems, ATPase component |
| 1704 | 1        | Cg1130    | (uppS1) [C]: PUTATIVE UNDECAPRENYL PYROPHOSPHATE SYNTHETASE (EC 2.5.1.31)                  |
| 1709 | 1        | Cg2207    | [M]: Predicted membrane-embedded Zn-dependent protease                                     |
| 1710 | 1        | Cg0465    | [M]: conserved hypothetical membrane protein                                               |
| 1712 | 1        | Cg2861    | [M]: membrane protein, hemolysin III homolog                                               |
| 1720 | 1        | Cg1682    | [C]: Trypsin-like serine protease                                                          |
| 1728 | 1        | Cg3412    | (azlD) [M]: Predicted branched-chain amino acid permease (azaleucine resistance)           |
| 1741 | 1        | Cg3223    | [C]: NADPH-dependent FMN reductase                                                         |
| 1748 | 1        | Cg2942    | [C]: Bacterial regulatory proteins, AsnC family                                            |
| 1750 | 1        | Cg1652    | (pctA) [S]: ALKYLPHOSPHONATE ABC TRANSPORTER (SECRETED PHOSPHATE-BINDING PROTEIN)          |
| 1751 | 1        | Cg1630    | [C]: PUTATIVE SIGNAL TRANSDUCTION PROTEIN, FHA DOMAIN                                      |
| 1770 | 1        | Cg1884    | [M]: putative membrane protein                                                             |
| 1771 | 1        | Cg2765    | [S]: putative secreted protein                                                             |
| 1783 | 1        | Cg2344    | (cysY) [C]: hyp. Cystathionine beta-Synthase                                               |
| 1803 | 1        | Cg0852    | [C]: conserved hypothetical protein                                                        |
| 1824 | 1        | Cg0240    | [M]: membrane protein                                                                      |
| 1827 | 1        | Cg1167    | [S]: putative secreted protein                                                             |
| 1832 | 1        | Cg1612    | [C]: Acetyltransferase                                                                     |

| hit  | peptides | accession | description                                                                  |
|------|----------|-----------|------------------------------------------------------------------------------|
| 1833 | 1        | Cg3129    | [C]: ABC-type transport system, ATPase component                             |
| 1837 | 1        | Cg1834    | [C]: ABC-type cobalamin/Fe3+-siderophores transport system, ATPase component |
| 1840 | 1        | Cg1783    | (soxA~) [C]: sarcosine oxidase - N-terminal fragment                         |
| 1846 | 1        | Cg2053    | [M]: putative membrane protein                                               |
| 1847 | 1        | Cg3139    | [C]: conserved hypothetical protein                                          |
| 1866 | 1        | Cg1348    | [M]: membrane protein containing CBS domain                                  |
| 1871 | 1        | Cg3345    | [C]: hypothetical protein predicted by Glimmer/Critica                       |
| 1875 | 1        | Cg0374    | [C]: conserved hypothetical protein                                          |
| 1879 | 1        | Cg3127    | [MS]: putative membrane protein                                              |
| 1886 | 1        | Cg0599    | (rpsS) [C]: 30S RIBOSOMAL PROTEIN S19                                        |
| 1892 | 1        | Cg3324    | [S]: putative secreted protein                                               |
| 1900 | 1        | Cg3331    | (ogt) [C]: METHYLATED-DNA--PROTEIN-CYSTEINE METHYLTRANSFERASE (EC 2.1.1.63)  |
| 1901 | 1        | Cg0337    | (whiB4) [C]: PUTATIVE REGULATORY PROTEIN (WHIB-RELATED PROTEIN)              |
| 1902 | 1        | Cg2607    | [M]: putative membrane protein                                               |
| 1904 | 1        | Cg1796    | (ribX) [M]: putative membrane protein - C. ammoniagenes RibX homolog         |
| 1907 | 1        | Cg1706    | [C]: Low molecular weight phosphotyrosine protein phosphatase                |
| 1911 | 1        | Cg3052    | [S]: putative secreted protein                                               |
| 1925 | 1        | Cg1326    | [C]: hypothetical protein predicted by Glimmer/Critica                       |
| 1930 | 1        | Cg1874    | [M]: putative membrane protein                                               |
| 1937 | 1        | Cg2824    | [C]: SAM-dependent methyltransferase                                         |
| 1949 | 1        | Cg2981    | (foIX) [C]: DIHYDRONEOPTERIN ALDOLASE (EC 4.1.2.25)                          |
| 1954 | 1        | Cg2121    | (ptsH) [C]: PHOSPHOCARRIER PROTEIN HPR                                       |
| 1959 | 1        | Cg2785    | [M]: putative membrane protein                                               |
| 1991 | 1        | Cg3105    | [C]: hypothetical protein predicted by Glimmer/Critica                       |
| 1993 | 1        | Cg1181    | [M]: Glycosyltransferase, probably involved in cell wall biogenesis          |
| 1998 | 1        | Cg2572    | [C]: conserved hypothetical protein                                          |
| 2001 | 1        | Cg0983    | (purN) [C]: (Q9RHX7) 5~-PHOSPHORIBOSYLGLYCINAMIDE FORMYLTRANSF (EC 2.1.2.2)  |
| 2036 | 1        | Cg1804    | (def2) [C]: POLYPEPTIDE DEFORMYLASE (EC 3.5.1.31)                            |
| 2048 | 1        | Cg2582    | [C]: conserved hypothetical protein                                          |
| 2049 | 1        | Cg3257    | [C]: conserved hypothetical protein                                          |
| 2051 | 1        | Cg2839    | [C]: conserved hypothetical protein                                          |
| 2078 | 1        | Cg1469    | [S]: putative secreted protein                                               |
| 2110 | 1        | Cg2033    | [S]: putative secreted protein                                               |
| 2119 | 1        | Cg2850    | [C]: conserved hypothetical protein                                          |
| 2120 | 1        | Cg0246    | [M]: GLYCOSYL TRANSFERASE                                                    |
| 2123 | 1        | Cg0500    | [C]: Bacterial regulatory protein, LysR family                               |
| 2137 | 1        | Cg0297    | [C]: Uncharacterized BCR, YbaB family COG0718                                |
| 2138 | 1        | Cg0107    | [S]: secreted protein                                                        |
| 2148 | 1        | Cg3110    | [C]: SLIGHTLY SIMILAR TO AQUAPORIN                                           |
| 2162 | 1        | Cg0582    | (rpsG) [C]: 30S RIBOSOMAL PROTEIN S7                                         |

| hit  | peptides | accession | description                                                       |
|------|----------|-----------|-------------------------------------------------------------------|
| 2163 | 1        | Cg1635    | [M]: putative membrane protein                                    |
| 2191 | 1        | Cg3423    | (trxC) [C]: THIOREDOXIN                                           |
| 2202 | 1        | Cg1085    | [C]: hypothetical protein predicted by Glimmer/Critica            |
| 2223 | 1        | Cg1894    | [C]: hypothetical protein predicted by Glimmer/Critica            |
| 2225 | 1        | Cg0588    | [C]: hypothetical protein                                         |
| 2232 | 1        | Cg1072    | (rplY) [C]: Ribosomal protein L25 (general stress protein Ctc)    |
| 2239 | 1        | Cg0155    | [C]: PUTATIVE ACETYLTRANSFERASE (EC 2.3.1.)                       |
| 2271 | 1        | Cg2443    | [M]: Permease of the major facilitator superfamily                |
| 2281 | 1        | Cg2996    | (~ptsX~) [M]: Phosphotransferase system IIC components - fragment |
| 2292 | 1        | Cg1241    | [C]: hypothetical protein predicted by Glimmer/Critica            |
| 2295 | 1        | Cg1708    | [C]: conserved hypothetical protein                               |
| 2301 | 1        | Cg2340    | [S]: ABC-type amino acid transport system, secreted component     |
| 2336 | 1        | Cg0358    | [C]: hydrolase or acyltransferase                                 |
| 2346 | 1        | Cg3267    | [MS]: putative membrane protein                                   |
| 2435 | 1        | Cg0321    | [M]: Na <sup>+</sup> /H <sup>+</sup> antiporter subunit           |
| 2443 | 1        | Cg1201    | [C]: hypothetical protein predicted by Glimmer/Critica            |
| 2447 | 1        | Cg0366    | [M]: conserved hypothetical protein, membrane                     |
| 2457 | 1        | Cg0087    | [M]: probable transmembrane transport protein                     |
| 2468 | 1        | Cg3433    | [C]: hypothetical protein predicted by Glimmer/Critica            |
| 2497 | 1        | Cg2710    | (int3) [C]: putative phage-type integrase                         |
| 2632 | 1        | Cg0380    | [C]: hypothetical protein                                         |
| 2635 | 1        | Cg2988    | (ppa) [C]: INORGANIC PYROPHOSPHATASE (EC 3.6.1.1)                 |
| 2716 | 1        | Cg0606    | [M]: hypothetical membrane protein                                |

END OF LIST I

| hit                                                                               | peptides | accession     | description                                             |
|-----------------------------------------------------------------------------------|----------|---------------|---------------------------------------------------------|
| <b>II. Purple membrane; elastase digest; nLC-ESI MS/MS, no search specificity</b> |          |               |                                                         |
| 1                                                                                 | 295      | P02945 BACR   | Bacteriorhodopsin                                       |
| 2                                                                                 | 214      | P00772 ELA1   | Elastase-1 precursor - Sus scrofa                       |
| 3                                                                                 | 83       | Q9HM69 CSG    | Cell surface glycoprotein                               |
| 4                                                                                 | 45       | Q9HMI3 Q9HMI3 | Dipeptide ABC transporter ATP-binding                   |
| 5                                                                                 | 38       | Q9HQA6 Q9HQA6 | Putative uncharacterized protein                        |
| 6                                                                                 | 38       | Q9HMW9 Q9HMW  | Dipeptide ABC transporter dipeptide-binding             |
| 7                                                                                 | 33       | Q9HRU5 Q9HRU5 | Immunogenic protein                                     |
| 11                                                                                | 26       | Q9HR99 Q9HR99 | Halocyanin-like                                         |
| 10                                                                                | 24       | Q9HNI7 Q9HNI7 | Possible phosphate binding protein                      |
| 12                                                                                | 24       | P16102 BACH   | Halorhodopsin                                           |
| 9                                                                                 | 23       | Q9HR20 Q9HR20 | Putative uncharacterized protein                        |
| 14                                                                                | 19       | Q9HHN1 Q9HHN1 | Na <sup>+</sup> /H <sup>+</sup> antiporter              |
| 16                                                                                | 16       | Q48302 Q48302 | Precursor proteolipid                                   |
| 17                                                                                | 16       | Q9HSA8 Q9HSA8 | Bifunctional short chain isoprenyl diphosphate synthase |
| 13                                                                                | 15       | Q9HS51 Q9HS51 | Putative uncharacterized protein                        |
| 15                                                                                | 14       | Q9HMW4 Q9HMW  | Oligopeptide binding protein                            |
| 18                                                                                | 14       | Q9HRL3 Q9HRL3 | F420H2:quinone oxidoreductase chain L                   |
| 19                                                                                | 13       | Q9HPQ5 Q9HPQ5 | Htr8 transducer                                         |
| 22                                                                                | 11       | Q9HRL1 Q9HRL1 | NADH dehydrogenase/oxidoreductase                       |
| 21                                                                                | 10       | Q9HN95 Q9HN95 | Cytochrome c oxidase subunit I                          |
| 24                                                                                | 9        | Q9HMH4 Q9HMH4 | Putative uncharacterized protein                        |
| 25                                                                                | 9        | O54610 O54610 | CydA                                                    |
| 26                                                                                | 8        | Q9HNV1 Q9HNV1 | Putative uncharacterized protein                        |
| 29                                                                                | 8        | Q9HHR4 Q9HHR4 | Vng6268c                                                |
| 30                                                                                | 8        | Q9HMU9 Q9HMU9 | Nitrite/nitrate reduction protein                       |
| 34                                                                                | 8        | Q9HN94 Q9HN94 | Cytochrome c oxidase subunit II                         |
| 23                                                                                | 7        | Q9HPB1 SECY   | Preprotein translocase subunit secY                     |
| 28                                                                                | 7        | Q9HS10 Q9HS10 | Phosphate ABC transporter periplasmic phosphate-binding |
| 33                                                                                | 7        | Q9HML5 Q9HML5 | Phosphate ABC transporter binding                       |
| 40                                                                                | 7        | Q9HQF4 Q9HQF4 | Membrane protein                                        |
| 20                                                                                | 6        | P33741 HTR1   | Sensory rhodopsin I transducer                          |
| 31                                                                                | 6        | Q9HR04 Q9HR04 | Iron-binding protein                                    |
| 48                                                                                | 6        | P57684 ATKA   | Potassium-transporting ATPase A chain                   |
| 51                                                                                | 6        | O54596 O54596 | CydB                                                    |
| 35                                                                                | 5        | Q9HRR2 Q9HRR2 | Cytochrome b6                                           |
| 44                                                                                | 5        | P33518 COX1   | Cytochrome c oxidase polypeptide 1                      |
| 52                                                                                | 5        | Q9HN25 Q9HN25 | Putative uncharacterized protein                        |

| hit | peptides | accession     | description                                    |
|-----|----------|---------------|------------------------------------------------|
| 53  | 5        | P25964 BACS1  | Sensory rhodopsin-1                            |
| 57  | 5        | Q9HRR1 Q9HRR1 | Putative uncharacterized protein               |
| 65  | 5        | Q9HRR3 Q9HRR3 | Putative uncharacterized protein               |
| 83  | 5        | Q9HME2 Q9HME2 | Putative uncharacterized protein               |
| 88  | 5        | Q9HRQ9 Q9HRQ9 | Putative uncharacterized protein               |
| 93  | 5        | Q9HN93 Q9HN93 | Halocyanin-like                                |
| 27  | 4        | Q9HRL2 Q9HRL2 | F420H2:quinone oxidoreductase chain M          |
| 36  | 4        | Q9HND8 VATI   | V-type ATP synthase subunit I                  |
| 43  | 4        | Q9HS47 Q9HS47 | Putative uncharacterized protein               |
| 46  | 4        | Q9HHP3 Q9HHP3 | Vng6297c                                       |
| 62  | 4        | O54523 O54523 | Putative uncharacterized protein               |
| 76  | 4        | Q9HRS9 Q9HRS9 | Putative uncharacterized protein               |
| 77  | 4        | Q9HNB9 Q9HNB9 | Putative uncharacterized protein               |
| 118 | 4        | Q9HHE7 Q9HHE7 | Vng6441h                                       |
| 128 | 4        | Q9HRF2 Q9HRF2 | Putative uncharacterized protein               |
| 248 | 4        | Q9HQ64 Q9HQ64 | Membrane anchor                                |
| 32  | 3        | Q9HRT0 Q9HRT0 | Putative uncharacterized protein               |
| 38  | 3        | Q9HMY1 Q9HMY1 | Sensor protein                                 |
| 39  | 3        | Q9HHI2 Q9HHI2 | L-lactate permease                             |
| 47  | 3        | Q9HRL8 Q9HRL8 | NADH dehydrogenase/oxidoreductase              |
| 50  | 3        | Q9HN37 Q9HN37 | Protein export                                 |
| 60  | 3        | Q9HR23 Q9HR23 | Ribose ABC transporter permease                |
| 67  | 3        | Q9HQY4 Q9HQY4 | Flagella accessory protein J                   |
| 82  | 3        | P82857 P82857 | Cytochrome-like protein                        |
| 84  | 3        | Q9HNY2 Q9HNY2 | Putative uncharacterized protein               |
| 89  | 3        | Q9HNN6 Q9HNN6 | Putative uncharacterized protein               |
| 91  | 3        | Q9HMS7 Q9HMS7 | DNA damage-inducible protein                   |
| 95  | 3        | Q9HMW2 Q9HMW  | Oligopeptide transport permease protein        |
| 121 | 3        | O54662 O54662 | Putative uncharacterized protein               |
| 123 | 3        | Q9HS59 Q9HS59 | Putative uncharacterized protein               |
| 127 | 3        | Q9HP49 Q9HP49 | Putative uncharacterized protein               |
| 145 | 3        | Q9HQA7 Q9HQA7 | Putative uncharacterized protein               |
| 153 | 3        | Q9HMT5 Q9HMT5 | Putative uncharacterized protein               |
| 155 | 3        | Q9HI34 Q9HI34 | Vng6345h                                       |
| 157 | 3        | Q9HSC3 LONH   | Putative protease La homolog type              |
| 212 | 3        | Q9HP06 Q9HP06 | Cation efflux system protein                   |
| 224 | 3        | Q9HRR0 Q9HRR0 | Putative uncharacterized protein               |
| 303 | 3        | O51978 O51978 | Putative uncharacterized protein               |
| 312 | 3        | Q9HRL4 Q9HRL4 | NADH dehydrogenase/oxidoreductase-like protein |
| 445 | 3        | Q9HML1 Q9HML1 | Putative uncharacterized protein               |



| hit | peptides | accession     | description                                                 |
|-----|----------|---------------|-------------------------------------------------------------|
| 8   | 2        | Q9HH34 Q9HH34 | Rhodopsin                                                   |
| 41  | 2        | Q9HRU7 Q9HRU7 | Putative uncharacterized protein                            |
| 42  | 2        | Q9HS86 Q9HS86 | Htr14 transducer                                            |
| 55  | 2        | O52005 O52005 | Putative uncharacterized protein                            |
| 56  | 2        | Q9HS26 Q9HS26 | Na <sup>+</sup> /H <sup>+</sup> antiporter                  |
| 58  | 2        | Q9HN17 Q9HN17 | 4-hydroxybutyrate CoA transferase                           |
| 64  | 2        | Q9HML7 Q9HML7 | Phosphate ABC transporter permease                          |
| 69  | 2        | Q9HP66 Q9HP66 | Putative uncharacterized protein                            |
| 75  | 2        | Q9HPT7 Q9HPT7 | Putative uncharacterized protein                            |
| 85  | 2        | Q9HNR2 Q9HNR2 | Putative uncharacterized protein                            |
| 87  | 2        | Q9HNF6 Q9HNF6 | Putative uncharacterized protein                            |
| 97  | 2        | Q9HNB6 Q9HNB6 | Putative uncharacterized protein                            |
| 98  | 2        | Q9HN36 Q9HN36 | Protein export                                              |
| 103 | 2        | Q9HNQ2 IF2P   | Probable translation initiation factor IF-2                 |
| 104 | 2        | Q9HNQ5 Q9HNQ5 | Putative uncharacterized protein                            |
| 105 | 2        | Q9HSW6 CDC61  | Cell division control protein 6 homolog 1                   |
| 111 | 2        | Q9HQT5 Q9HQT5 | Htr13 transducer                                            |
| 122 | 2        | Q9HRN3 Q9HRN3 | Proteinase IV homolog                                       |
| 124 | 2        | Q9HMG7 Q9HMG7 | Ferrichrome ABC transporter permease                        |
| 135 | 2        | Q9HP32 PYRG   | CTP synthase                                                |
| 137 | 2        | Q9HNS6 Q9HNS6 | Putative uncharacterized protein                            |
| 139 | 2        | Q9HSQ7 Q9HSQ7 | ABC transport protein                                       |
| 147 | 2        | Q9HS33 Q9HS33 | Multidrug resistance protein homolog                        |
| 152 | 2        | Q9HSB1 Q9HSB1 | Dolichol-P-glucose synthetase                               |
| 172 | 2        | Q9HPX5 Q9HPX5 | Htr-like protein                                            |
| 174 | 2        | Q9HNT7 Q9HNT7 | Subtilisin homolog                                          |
| 187 | 2        | Q9HPF9 Q9HPF9 | Putative uncharacterized protein                            |
| 199 | 2        | O73955 CATA   | Peroxidase/catalase                                         |
| 205 | 2        | P71411 BACS2  | Sensory rhodopsin-2                                         |
| 209 | 2        | Q9HRJ3 Q9HRJ3 | Putative uncharacterized protein                            |
| 225 | 2        | Q9HQ63 DHSD   | Succinate dehydrogenase hydrophobic membrane anchor subunit |
| 226 | 2        | Q9HQN5 Q9HQN5 | Glycine betaine transporter                                 |
| 232 | 2        | Q9HQQ5 Q9HQQ5 | Probable transport protein                                  |
| 239 | 2        | Q9HRT5 Q9HRT5 | Putative uncharacterized protein                            |
| 246 | 2        | Q9HM75 Q9HM75 | Cytochrome oxidase subunit I homolog                        |
| 251 | 2        | Q9HRW7 Q9HRW7 | Putative uncharacterized protein                            |
| 254 | 2        | Q9HN92 Q9HN92 | Putative uncharacterized protein                            |
| 263 | 2        | Q9HM70 Q9HM70 | Putative uncharacterized protein                            |
| 270 | 2        | Q9HSF1 Q9HSF1 | Putative uncharacterized protein                            |
| 271 | 2        | Q9HMM6 CSD    | Probable cysteine desulfurase                               |

| hit | peptides | accession       | description                                       |
|-----|----------|-----------------|---------------------------------------------------|
| 272 |          | 2 Q9HRJ8 Q9HRJ8 | Heme synthase                                     |
| 293 |          | 2 Q9HQP1 Q9HQP1 | Putative uncharacterized protein                  |
| 304 |          | 2 Q9HSG5 TRUD   | Probable tRNA pseudouridine synthase D            |
| 306 |          | 2 Q9HP92 Q9HP92 | GTP-binding protein homolog                       |
| 309 |          | 2 Q9HRC9 Q9HRC9 | Putative uncharacterized protein                  |
| 311 |          | 2 Q9HPU7 Q9HPU7 | Bacteriorhodopsin related protein                 |
| 327 |          | 2 Q9HQV9 Q9HQV9 | Putative uncharacterized protein                  |
| 328 |          | 2 Q9HR50 Q9HR50 | Putative uncharacterized protein                  |
| 329 |          | 2 Q9HMZ1 Q9HMZ1 | Delta-aminolevulinic acid dehydratase             |
| 337 |          | 2 Q9HMD8 Q9HMD8 | Putative uncharacterized protein                  |
| 349 |          | 2 Q9HRZ5 Q9HRZ5 | Pyruvate ferredoxin oxidoreductase, subunit alpha |
| 385 |          | 2 Q9HQ25 Q9HQ25 | Putative uncharacterized protein                  |
| 388 |          | 2 Q9HQF0 Q9HQF0 | Acyl-CoA dehydrogenase                            |
| 393 |          | 2 Q9HRB8 Q9HRB8 | Putative uncharacterized protein                  |
| 398 |          | 2 Q9HNG3 Q9HNG3 | Putative uncharacterized protein                  |
| 399 |          | 2 Q9HS00 Q9HS00 | Putative uncharacterized protein                  |
| 403 |          | 2 Q9HMW6 Q9HMW  | Putative uncharacterized protein                  |
| 415 |          | 2 Q9HSY7 Q9HSY7 | Putative uncharacterized protein                  |
| 417 |          | 2 Q9HQU0 Q9HQU0 | Putative uncharacterized protein                  |
| 425 |          | 2 P05971 RL15   | 50S ribosomal protein L15P                        |
| 440 |          | 2 Q9HRW2 Q9HRW2 | Putative uncharacterized protein                  |
| 451 |          | 2 Q9HQV6 Q9HQV6 | Putative uncharacterized protein                  |
| 487 |          | 2 Q9HQ91 Q9HQ91 | Putative uncharacterized protein                  |
| 518 |          | 2 Q9HMW1 Q9HMW  | Oligopeptide ABC transporter ATP-binding          |
| 558 |          | 2 Q9HRR5 Q9HRR5 | Putative uncharacterized protein                  |
| 585 |          | 2 Q9HRB9 Q9HRB9 | Phosphate regulatory protein homolog              |
| 604 |          | 2 Q9HHP9 Q9HHP9 | Vng6290h                                          |
| 628 |          | 2 Q9HHJ7 CDC66  | Cell division control protein 6 homolog 6         |
| 670 |          | 2 Q9HQV2 Q9HQV2 | Putative uncharacterized protein                  |
| 739 |          | 2 Q9HPZ6 Y1401  | UPF0179 protein VNG1401C                          |
| 859 |          | 2 Q9HPK2 Y1595  | UPF0100 protein VNG1595C                          |
| 45  |          | 1 Q9HP84 HTR4   | Halobacterial transducer protein 4                |
| 49  |          | 1 Q9HR41 Q9HR41 | Possible signaling protein                        |
| 61  |          | 1 Q9HNG4 Q9HNG4 | Putative uncharacterized protein                  |
| 63  |          | 1 Q9HS95 Q9HS95 | Chromosome segregation                            |
| 68  |          | 1 P57699 ATKB   | Potassium-transporting ATPase B chain             |
| 70  |          | 1 Q9HNT5 Q9HNT5 | Putative uncharacterized protein                  |
| 71  |          | 1 P71414 P71414 | Transducer HtC protein                            |
| 72  |          | 1 Q9HSL5 Q9HSL5 | Cationic amino acid transporter                   |
| 73  |          | 1 Q9HNR0 Q9HNR0 | Protein-export membrane protein                   |

| hit | peptides | accession     | description                                           |
|-----|----------|---------------|-------------------------------------------------------|
| 74  | 1        | Q9HPQ1 Q9HPQ1 | Sodium-and chloride-dependent transporter             |
| 79  | 1        | Q9HSJ6 Q9HSJ6 | Putative uncharacterized protein                      |
| 80  | 1        | Q9HSM2 MUTS1  | DNA mismatch repair protein mutS 1                    |
| 81  | 1        | Q9HP01 Q9HP01 | Spermidine/putrescine ABC transporter permease        |
| 92  | 1        | Q9HMK5 Q9HMK5 | Putative uncharacterized protein                      |
| 94  | 1        | Q9HR54 Q9HR54 | Putative uncharacterized protein                      |
| 96  | 1        | Q9HRS0 Q9HRS0 | Putative uncharacterized protein                      |
| 99  | 1        | Q9HMI2 Q9HMI2 | Dipeptide ABC transporter permease                    |
| 100 | 1        | Q9HT01 Q9HT01 | Putative uncharacterized protein                      |
| 101 | 1        | Q9HQ54 Q9HQ54 | Putative uncharacterized protein                      |
| 102 | 1        | O51965 O51965 | RepH                                                  |
| 106 | 1        | Q9HP81 HTR2   | Sensory rhodopsin II transducer                       |
| 107 | 1        | Q9HMV6 HELS   | Putative ski2-type helicase                           |
| 108 | 1        | Q9HR16 Q9HR16 | Proline permease                                      |
| 110 | 1        | Q9HS12 Q9HS12 | Phosphate ABC transporter permease                    |
| 113 | 1        | Q9HPN8 Q9HPN8 | Chloride channel                                      |
| 114 | 1        | Q9HHP2 Q9HHP2 | Vng6298c                                              |
| 115 | 1        | Q9HR05 Q9HR05 | Iron transporter-like protein                         |
| 119 | 1        | Q9HR13 Q9HR13 | Putative uncharacterized protein                      |
| 125 | 1        | Q9HNN6 Q9HNN6 | Threonine dehydratase                                 |
| 126 | 1        | Q9HSV6 Q9HSV6 | Putative uncharacterized protein                      |
| 129 | 1        | Q9HR62 Q9HR62 | Putative uncharacterized protein                      |
| 130 | 1        | Q9HRT4 Q9HRT4 | Putative uncharacterized protein                      |
| 131 | 1        | Q9HQ23 Q9HQ23 | Putative uncharacterized protein                      |
| 133 | 1        | Q9HNN9 Q9HNN9 | Protein-export membrane protein                       |
| 136 | 1        | Q9HS71 Q9HS71 | Cell division protein ftsZ                            |
| 141 | 1        | Q9HSN5 Q9HSN5 | Zinc-transporting ATPase                              |
| 142 | 1        | Q9HS03 Q9HS03 | Putative uncharacterized protein                      |
| 143 | 1        | Q9HQJ9 Q9HQJ9 | Putative 2-ketoglutarate ferredoxin oxidoreductase    |
| 144 | 1        | Q9HQZ0 Q9HQZ0 | Acetyl-CoA synthetase                                 |
| 160 | 1        | Q9HI06 Q9HI06 | Vng6135c                                              |
| 163 | 1        | Q9HRD0 Q9HRD0 | Anion permease                                        |
| 165 | 1        | Q9HPV6 Q9HPV6 | Putative uncharacterized protein                      |
| 167 | 1        | Q9HSM6 MUTL   | DNA mismatch repair protein mutL                      |
| 168 | 1        | Q9HN16 Q9HN16 | Putative uncharacterized protein                      |
| 171 | 1        | Q9HP43 CARB   | Carbamoyl-phosphate synthase large chain              |
| 176 | 1        | Q9HRM4 Q9HRM4 | Putative uncharacterized protein                      |
| 177 | 1        | Q9HM71 Q9HM71 | Putative uncharacterized protein                      |
| 178 | 1        | O54630 O54630 | Putative uncharacterized protein                      |
| 185 | 1        | Q9HN44 Q9HN44 | Na <sup>+</sup> /Ca <sup>2+</sup> -exchanging protein |

| hit | peptides | accession     | description                                   |
|-----|----------|---------------|-----------------------------------------------|
| 186 | 1        | Q9HHU7 Q9HHU7 | Cationic amino acid transporter               |
| 192 | 1        | Q9HRT3 Q9HRT3 | Succinoglycan biosynthesis transport protein  |
| 193 | 1        | Q9HQ81 Q9HQ81 | TRK potassium uptake system protein           |
| 197 | 1        | Q9HMK9 IF2G   | Translation initiation factor 2 subunit gamma |
| 200 | 1        | Q9HMX2 Q9HMX2 | Oligopeptide ABC transporter                  |
| 201 | 1        | Q9HN70 THSA   | Thermosome subunit alpha                      |
| 206 | 1        | Q9HQD6 HUTI   | Probable imidazolonepropionase                |
| 207 | 1        | O52009 O52009 | RepJ                                          |
| 211 | 1        | Q9HMU6 Q9HMU6 | Putative uncharacterized protein              |
| 214 | 1        | Q9HQ03 Q9HQ03 | Putative uncharacterized protein              |
| 215 | 1        | Q9HPA2 Q9HPA2 | Htr17 transducer                              |
| 216 | 1        | Q9HNG6 Q9HNG6 | Putative uncharacterized protein              |
| 218 | 1        | Q9HRE4 Q9HRE4 | Sensor protein                                |
| 219 | 1        | Q9HRH7 Q9HRH7 | Putative uncharacterized protein              |
| 236 | 1        | Q9HRN5 Q9HRN5 | Putative uncharacterized protein              |
| 244 | 1        | Q9HP89 Q9HP89 | Photolyase/cryptochrome                       |
| 245 | 1        | Q9HPD9 Q9HPD9 | Putative uncharacterized protein              |
| 247 | 1        | Q9HNC9 Q9HNC9 | Putative uncharacterized protein              |
| 249 | 1        | Q9HHR2 Q9HHR2 | Sn-glycerol-1-phosphate dehydrogenase         |
| 252 | 1        | Q9HN22 Q9HN22 | Putative uncharacterized protein              |
| 258 | 1        | Q9HPR5 Q9HPR5 | Cell division protein pelota                  |
| 266 | 1        | Q9HR01 Q9HR01 | Putative uncharacterized protein              |
| 267 | 1        | Q9HSL4 Q9HSL4 | TRK potassium uptake system protein           |
| 268 | 1        | O51984 O51984 | Putative uncharacterized protein              |
| 273 | 1        | Q9HPQ4 Q9HPQ4 | Putative uncharacterized protein              |
| 276 | 1        | Q9HPL9 Q9HPL9 | Putative uncharacterized protein              |
| 277 | 1        | Q9HRM6 Q9HRM6 | Aspartate aminotransferase                    |
| 278 | 1        | Q9HNI3 Q9HNI3 | Putative uncharacterized protein              |
| 283 | 1        | Q9HN79 Q9HN79 | DNA damage-inducible protein                  |
| 286 | 1        | Q9HSA1 Q9HSA1 | Phosphoenolpyruvate synthase                  |
| 287 | 1        | Q9HQ15 Q9HQ15 | Ornithine carbamoyltransferase                |
| 289 | 1        | Q9HNP8 Q9HNP8 | Oligopeptidase                                |
| 291 | 1        | Q9HPD4 RL3    | 50S ribosomal protein L3P                     |
| 297 | 1        | Q9HSR4 Q9HSR4 | Oxidoreductase                                |
| 298 | 1        | Q9HRJ7 Q9HRJ7 | ABC transporter, ATP-binding protein homolog  |
| 301 | 1        | Q9HMK3 SYFB   | Phenylalanyl-tRNA synthetase beta chain       |
| 308 | 1        | Q9HP12 Q9HP12 | Putative uncharacterized protein              |
| 314 | 1        | Q9HN02 Q9HN02 | Hemolysin protein                             |
| 316 | 1        | Q9HSC1 TRPC   | Indole-3-glycerol phosphate synthase          |
| 317 | 1        | Q9HMK5 Q9HMK5 | Putative uncharacterized protein              |

| hit | peptides | accession     | description                                                 |
|-----|----------|---------------|-------------------------------------------------------------|
| 318 | 1        | O51963 O51963 | Putative uncharacterized protein                            |
| 319 | 1        | Q9HRN6 Q9HRN6 | Htr16 transducer                                            |
| 320 | 1        | Q9HQT0 Q9HQT0 | Putative uncharacterized protein                            |
| 322 | 1        | Q9HMG3 Q9HMG3 | Putative uncharacterized protein                            |
| 323 | 1        | Q9HMB7 Q9HMB7 | Probable carboxypeptidase                                   |
| 335 | 1        | Q9HPQ2 Q9HPQ2 | Daunorubicin resistance ABC transporter ATP-binding protein |
| 339 | 1        | Q9HHQ6 Q9HHQ6 | Sn-glycerol-3-phosphate transport system permease           |
| 343 | 1        | Q9HQI9 ENO    | Enolase                                                     |
| 350 | 1        | Q9HR72 Q9HR72 | Molybdopterin oxidoreductase                                |
| 353 | 1        | Q9HNE5 Q9HNE5 | Geranylgeranyl-diphosphate geranylgeranyltransferase        |
| 355 | 1        | Q9HMC6 Q9HMC6 | Hydroxymethylpyrimidine phosphate kinase                    |
| 357 | 1        | Q9HRF8 Q9HRF8 | Putative uncharacterized protein araL                       |
| 360 | 1        | Q9HQS6 Q9HQS6 | Putative uncharacterized protein                            |
| 362 | 1        | P13077 FLAB2  | Flagellin B2                                                |
| 364 | 1        | Q9HM89 EF1A   | Elongation factor 1-alpha                                   |
| 365 | 1        | Q9HSG1 Q9HSG1 | Putative uncharacterized protein                            |
| 367 | 1        | Q9HHR9 Q9HHR9 | Sodium-dependent transporter                                |
| 370 | 1        | O52039 O52039 | Putative uncharacterized protein                            |
| 371 | 1        | Q9HP02 Q9HP02 | Spermidine/putrescine ABC transporter permease              |
| 372 | 1        | Q9HMP2 Q9HMP2 | Aminopeptidase homolog                                      |
| 373 | 1        | P50562 RL18   | 50S ribosomal protein L18P                                  |
| 378 | 1        | Q9HP11 Q9HP11 | Translation initiation factor eIF-2B subunit alpha          |
| 384 | 1        | Q9HRE2 Q9HRE2 | Putative uncharacterized protein                            |
| 387 | 1        | Q9HR91 Q9HR91 | Succinate-semialdehyde dehydrogenase                        |
| 390 | 1        | Q9HSA2 Q9HSA2 | Zinc metalloproteinase homolog                              |
| 394 | 1        | Q9HRL5 Q9HRL5 | Putative uncharacterized protein                            |
| 401 | 1        | P13078 FLAB3  | Flagellin B3                                                |
| 404 | 1        | Q9HRD4 Q9HRD4 | Protein kinase                                              |
| 411 | 1        | Q9HRV6 Q9HRV6 | Putative uncharacterized protein                            |
| 423 | 1        | Q9HMK2 PYRD   | Dihydroorotate dehydrogenase                                |
| 424 | 1        | Q9HQP8 Q9HQP8 | Rhamnosyl transferase                                       |
| 426 | 1        | Q9HMH9 PYRC   | Dihydroorotase                                              |
| 427 | 1        | Q9HPR3 Q9HPR3 | Putative uncharacterized protein                            |
| 428 | 1        | Q9HR79 Q9HR79 | Type II secretion system protein                            |
| 432 | 1        | Q9HR30 Q9HR30 | DNA gyrase subunit B                                        |
| 433 | 1        | Q9HRF4 Q9HRF4 | Putative uncharacterized protein                            |
| 436 | 1        | Q9HNA5 Q9HNA5 | MCM / cell division control protein 21                      |
| 439 | 1        | Q9HHY0 Q9HHY0 | Cationic amino acid transporter                             |
| 442 | 1        | Q9HHR8 Q9HHR8 | ABC transporter, permease protein                           |
| 446 | 1        | Q9HMR2 Q9HMR2 | Glycolate oxidase subunit                                   |

| hit | peptides | accession       | description                                                       |
|-----|----------|-----------------|-------------------------------------------------------------------|
| 455 | 1        | Q9HMB8 Q9HMB8   | Putative uncharacterized protein                                  |
| 459 | 1        | Q9HNB5 Q9HNB5   | Alcohol dehydrogenase                                             |
| 461 | 1        | Q9HN35 Q9HN35   | Mismatch repair protein                                           |
| 462 | 1        | Q9HNT1 ATGT     | 7-cyano-7-deazaguanine tRNA-ribosyltransferase                    |
| 465 | 1        | Q9HQB9 Q9HQB9   | Sensor protein                                                    |
| 468 | 1        | Q9HS08 Q9HS08   | Nodulation protein                                                |
| 474 | 1        | Q9HPD1 RL2      | 50S ribosomal protein L2P                                         |
| 480 | 1        | Q9HSI4 Q9HSI4   | Putative uncharacterized protein                                  |
| 490 | 1        | Q9HQZ1 Q9HQZ1   | GufA protein                                                      |
| 494 | 1        | Q9HQ12 Q9HQ12   | Extragenic suppressor homolog                                     |
| 497 | 1        | Q9HHQ7 Q9HHQ7   | Sn-glycerol-3-phosphate transport system permease                 |
| 500 | 1        | Q9HRK1 Q9HRK1   | Cytochrome c oxidase subunit III                                  |
| 506 | 1        | Q9HRA7 Q9HRA7   | CDP-diacylglycerol-serine O-phosphatidyltransferase               |
| 512 | 1        | Q9HNNH3 Q9HNNH3 | Potassium channel homolog                                         |
| 517 | 1        | Q9HS50 Q9HS50   | Putative uncharacterized protein                                  |
| 522 | 1        | Q9HP58 Q9HP58   | Putative uncharacterized protein                                  |
| 524 | 1        | Q9HMZ0 Q9HMZ0   | Putative uncharacterized protein                                  |
| 525 | 1        | Q9HQV1 Q9HQV1   | Putative uncharacterized protein                                  |
| 526 | 1        | Q9HS82 Q9HS82   | Putative uncharacterized protein                                  |
| 528 | 1        | Q9HN50 SAHH     | Adenosylhomocysteinase                                            |
| 530 | 1        | Q9HQQ6 Q9HQQ6   | Glycosyl transferase-like                                         |
| 533 | 1        | Q9HN47 PRIL     | Probable DNA primase large subunit                                |
| 537 | 1        | Q9HRJ0 Q9HRJ0   | Putative uncharacterized protein                                  |
| 541 | 1        | Q9HPS5 Q9HPS5   | Putative uncharacterized protein                                  |
| 545 | 1        | Q9HPN1 Q9HPN1   | Cobalamin biosynthesis                                            |
| 546 | 1        | O51994 O51994   | Putative uncharacterized protein                                  |
| 551 | 1        | Q9HQ85 Q9HQ85   | Putative uncharacterized protein                                  |
| 553 | 1        | Q9HNS4 Q9HNS4   | Glycerol-3-phosphate dehydrogenase chain A                        |
| 556 | 1        | Q9HPP8 Q9HPP8   | Biotin carboxylase                                                |
| 560 | 1        | Q9HMZ4 Y2317    | Putative ABC transporter ATP-binding protein VNG2317G             |
| 563 | 1        | Q9HMW3 Q9HMW    | Oligopeptide ABC permease                                         |
| 565 | 1        | Q9HRC1 Q9HRC1   | Putative uncharacterized protein                                  |
| 566 | 1        | Q9HQW6 CHEB     | Chemotaxis response regulator protein-glutamate methyltransferase |
| 584 | 1        | Q9HSV2 Q9HSV2   | LPS biosynthesis protein                                          |
| 586 | 1        | Q9HP54 Q9HP54   | Putative uncharacterized protein                                  |
| 589 | 1        | Q9HRL0 Q9HRL0   | Putative uncharacterized protein                                  |
| 593 | 1        | Q9HPA3 Q9HPA3   | Putative uncharacterized protein                                  |
| 594 | 1        | Q9HQX0 Q9HQX0   | Chemotaxis protein                                                |
| 597 | 1        | Q9HRZ2 Q9HRZ2   | Probable oxidoreductase                                           |
| 598 | 1        | Q9HMH3 Q9HMH3   | Putative uncharacterized protein                                  |

| hit | peptides | accession     | description                                       |
|-----|----------|---------------|---------------------------------------------------|
| 599 | 1        | Q9HHG1 Q9HHG1 | Vng6416h                                          |
| 606 | 1        | P08959 GVPA2  | Gas vesicle structural protein 2                  |
| 616 | 1        | Q9HSG4 Q9HSG4 | Putative uncharacterized protein                  |
| 617 | 1        | Q9HNV3 Q9HNV3 | NADH dehydrogenase/oxidoreductase-like protein    |
| 618 | 1        | Q9HSG2 Q9HSG2 | Putative uncharacterized protein                  |
| 619 | 1        | O54654 O54654 | Putative uncharacterized protein                  |
| 620 | 1        | Q9HSW4 Q9HSW4 | Glucose-1-phosphate thymidyltransferase           |
| 623 | 1        | Q9HSR9 Q9HSR9 | Type I restriction modification enzyme, M subunit |
| 632 | 1        | Q9HPZ7 Q9HPZ7 | Putative uncharacterized protein                  |
| 633 | 1        | Q9HRJ5 Q9HRJ5 | Putative uncharacterized protein                  |
| 635 | 1        | Q9HN45 PCNA   | DNA polymerase sliding clamp                      |
| 640 | 1        | P15756 RS12   | 30S ribosomal protein S12P                        |
| 642 | 1        | Q9HSR5 Q9HSR5 | Putative uncharacterized protein                  |
| 647 | 1        | Q9HSQ2 HTPX   | Probable protease htpX homolog                    |
| 655 | 1        | Q9HQE5 Q9HQE5 | Putative uncharacterized protein                  |
| 660 | 1        | Q9HPQ7 Q9HPQ7 | Putative uncharacterized protein                  |
| 664 | 1        | Q9HSK1 Q9HSK1 | Putative uncharacterized protein                  |
| 665 | 1        | Q9HHX5 Q9HHX5 | Cationic amino acid transporter                   |
| 669 | 1        | Q9HMT1 Q9HMT1 | Putative uncharacterized protein                  |
| 677 | 1        | Q9HQH4 Q9HQH4 | Putative uncharacterized protein                  |
| 679 | 1        | Q9HSW8 Q9HSW8 | Putative uncharacterized protein                  |
| 683 | 1        | Q9HN66 SYW2   | Tryptophanyl-tRNA synthetase 2                    |
| 689 | 1        | Q9HR96 Q9HR96 | Putative uncharacterized protein                  |
| 707 | 1        | Q9HPT8 Q9HPT8 | Putative uncharacterized protein                  |
| 712 | 1        | Q9HQ62 Q9HQ62 | 3-methyladenine DNA glycosylase                   |
| 719 | 1        | Q9HR47 Q9HR47 | Asparagine synthetase                             |
| 720 | 1        | Q9HSE6 Q9HSE6 | Putative uncharacterized protein                  |
| 730 | 1        | Q9HNG1 Y2119  | UPF0290 protein VNG2119C                          |
| 731 | 1        | Q9HS84 Q9HS84 | Putative uncharacterized protein                  |
| 742 | 1        | Q9HMQ2 ASSY   | Argininosuccinate synthase                        |
| 745 | 1        | Q9HQ19 Q9HQ19 | Iron                                              |
| 748 | 1        | Q9HNV9 Q9HNV9 | Putative uncharacterized protein                  |
| 750 | 1        | Q9HS91 Q9HS91 | Putative uncharacterized protein                  |
| 752 | 1        | P57697 PSMA   | Proteasome subunit alpha                          |
| 753 | 1        | Q9HPR9 Q9HPR9 | Putative uncharacterized protein                  |
| 754 | 1        | Q9HQF7 Q9HQF7 | Heme biosynthesis protein                         |
| 762 | 1        | Q9HRL6 Q9HRL6 | Putative uncharacterized protein                  |
| 769 | 1        | Q9HNX6 Y1901  | UPF0343 protein VNG1901C                          |
| 773 | 1        | Q9HPR7 Q9HPR7 | Putative uncharacterized protein                  |
| 774 | 1        | Q9HSQ5 Q9HSQ5 | Putative uncharacterized protein                  |

| hit  | peptides | accession     | description                                                      |
|------|----------|---------------|------------------------------------------------------------------|
| 776  | 1        | Q9HS66 TRPE2  | Anthranilate synthase component 1 2                              |
| 778  | 1        | Q9HHV9 Q9HHV9 | Vng6204h                                                         |
| 795  | 1        | Q9HQP0 Q9HQP0 | Glycerol-3-phosphate dehydrogenase chain A                       |
| 805  | 1        | Q9HJQ4 RPOD   | DNA-directed RNA polymerase subunit D                            |
| 811  | 1        | Q9HS73 Q9HS73 | Transcription termination-antitermination factor                 |
| 814  | 1        | Q9HMC5 Q9HMC5 | Putative uncharacterized protein                                 |
| 817  | 1        | Q9HME6 Q9HME6 | Putative uncharacterized protein                                 |
| 818  | 1        | Q9HSV1 Q9HSV1 | UDP-glucose 4-epimerase                                          |
| 820  | 1        | Q9HSF8 PCRB   | Protein pcrB homolog                                             |
| 824  | 1        | Q9HQF5 Q9HQF5 | Coenzyme PQQ synthesis protein                                   |
| 828  | 1        | Q9HPN5 Q9HPN5 | Putative uncharacterized protein                                 |
| 831  | 1        | Q9HQT2 Q9HQT2 | Putative uncharacterized protein                                 |
| 832  | 1        | Q9HSZ9 Q9HSZ9 | Glucose-1-phosphate thymidyltransferase                          |
| 834  | 1        | Q9HP41 Q9HP41 | Transcription regulator                                          |
| 837  | 1        | Q9HNX1 Q9HNX1 | Putative uncharacterized protein                                 |
| 846  | 1        | Q9HRM1 Q9HRM1 | NADH dehydrogenase/oxidoreductase-like protein                   |
| 876  | 1        | Q9HQ46 PHR    | Deoxyribodipyrimidine photo-lyase                                |
| 879  | 1        | Q9HT00 GLMS   | Glucosamine--fructose-6-phosphate aminotransferase [isomerizing] |
| 885  | 1        | Q9HMH2 Y2543  | Protein VNG2543C                                                 |
| 886  | 1        | Q9HMK7 Q9HMK7 | ATP-binding protein                                              |
| 894  | 1        | Q9HR70 Q9HR70 | Putative uncharacterized protein                                 |
| 906  | 1        | Q9HNN8 Q9HNN8 | Putative uncharacterized protein                                 |
| 919  | 1        | Q9HHU8 Q9HHU8 | TRK potassium uptake system protein                              |
| 924  | 1        | O54605 O54605 | Putative uncharacterized protein                                 |
| 953  | 1        | Q9HQS8 Q9HQS8 | Putative uncharacterized protein                                 |
| 954  | 1        | Q9HHK7 Q9HHK7 | Vng6348h                                                         |
| 958  | 1        | Q9HN71 Q9HN71 | Ornithine cyclodeaminase                                         |
| 959  | 1        | Q9HHL5 Q9HHL5 | Spo0A activation inhibitor                                       |
| 965  | 1        | Q9HPH2 Q9HPH2 | Putative uncharacterized protein                                 |
| 977  | 1        | Q9HQY9 Q9HQY9 | Putative uncharacterized protein                                 |
| 978  | 1        | Q9HHF3 Q9HHF3 | Vng6431h                                                         |
| 985  | 1        | Q9HNN1 Q9HNN1 | Succinate dehydrogenase subunit                                  |
| 986  | 1        | P33963 GVPK2  | Protein gvpK 2                                                   |
| 1009 | 1        | Q9HHZ7 Q9HHZ7 | Spo0A activation inhibitor                                       |
| 1010 | 1        | Q9HSV9 Q9HSV9 | Putative uncharacterized protein                                 |
| 1024 | 1        | Q9HSB5 Q9HSB5 | Putative uncharacterized protein                                 |
| 1027 | 1        | Q9HSG7 Q9HSG7 | Putative uncharacterized protein                                 |
| 1040 | 1        | Q9HSA9 Q9HSA9 | Putative uncharacterized protein                                 |
| 1041 | 1        | Q9HPH8 Q9HPH8 | Putative uncharacterized protein                                 |
| 1060 | 1        | Q9HMD5 Q9HMD5 | Putative uncharacterized protein                                 |



| hit  | peptides | accession     | description                                         |
|------|----------|---------------|-----------------------------------------------------|
| 1062 | 1        | Q9HR40 Q9HR40 | Putative uncharacterized protein                    |
| 1070 | 1        | Q9HQR3 Q9HQR3 | Putative uncharacterized protein                    |
| 1076 | 1        | O54608 Y3061  | UPF0033 protein VNG5061C/VNG5236C/VNG6059C/VNG6467C |
| 1085 | 1        | Q9HS14 Q9HS14 | Transcriptional regulator                           |
| 1090 | 1        | Q9HML3 Q9HML3 | Putative uncharacterized protein                    |
| 1094 | 1        | Q9HMI5 Q9HMI5 | Putative uncharacterized protein                    |
| 1096 | 1        | Q9HPB8 RL6    | 50S ribosomal protein L6P                           |
| 1100 | 1        | Q9HR94 Q9HR94 | Putative uncharacterized protein                    |
| 1105 | 1        | Q9HPD8 Q9HPD8 | Phytoene dehydrogenase                              |
| 1107 | 1        | Q9HMF0 Q9HMF0 | Pab N-terminal acetyltransferase                    |
| 1109 | 1        | Q9HMI7 Q9HMI7 | Putative uncharacterized protein                    |
| 1113 | 1        | Q9HMJ1 Q9HMJ1 | Putative uncharacterized protein                    |
| 1120 | 1        | P15008 RL22   | 50S ribosomal protein L22P                          |
| 1128 | 1        | Q9HR00 GRPE   | Protein grpE                                        |
| 1149 | 1        | Q9HHN6 Q9HHN6 | Vng6306c                                            |
| 1153 | 1        | Q9HS42 Q9HS42 | Adenylosuccinate lyase                              |
| 1154 | 1        | Q9HRU9 Q9HRU9 | Putative uncharacterized protein                    |
| 1159 | 1        | O54646 O54646 | Putative uncharacterized protein                    |
| 1163 | 1        | Q9HMJ9 Q9HMJ9 | Putative uncharacterized protein                    |
| 1167 | 1        | P15763 RS7    | 30S ribosomal protein S7P                           |
| 1170 | 1        | Q9HRZ7 Q9HRZ7 | Putative uncharacterized protein                    |
| 1191 | 1        | P13044 GVPE1  | Protein gvpE 1                                      |
| 1193 | 1        | O52020 O52020 | Putative uncharacterized protein                    |
| 1204 | 1        | Q9HPT5 Q9HPT5 | Putative uncharacterized protein                    |
| 1210 | 1        | Q9HHL1 Q9HHL1 | Vng6343h                                            |
| 1216 | 1        | Q9HRK5 Q9HRK5 | Putative uncharacterized protein                    |
| 1225 | 1        | Q9HQC2 AROC   | Chorismate synthase                                 |
| 1227 | 1        | Q9HN85 Q9HN85 | Phosphomannomutase                                  |
| 1233 | 1        | Q9HQ04 Q9HQ04 | Putative uncharacterized protein                    |
| 1246 | 1        | Q9HPE9 RS8E   | 30S ribosomal protein S8e                           |
| 1254 | 1        | Q9HQV5 Q9HQV5 | Putative uncharacterized protein                    |
| 1256 | 1        | Q9HQB8 Q9HQB8 | Glyoxalase                                          |
| 1264 | 1        | Q9HR06 Q9HR06 | Spermidine/putrescine ABC transporter ATP-binding   |
| 1267 | 1        | Q9HMD3 Q9HMD3 | Putative uncharacterized protein                    |
| 1280 | 1        | Q9HQ35 Q9HQ35 | Putative uncharacterized protein                    |
| 1294 | 1        | Q9HQC3 Q9HQC3 | Putative uncharacterized protein                    |
| 1298 | 1        | Q9HN39 Q9HN39 | Putative uncharacterized protein                    |
| 1345 | 1        | O52038 O52038 | Putative uncharacterized protein                    |
| 1363 | 1        | Q9HN99 Q9HN99 | Putative uncharacterized protein                    |
| 1384 | 1        | Q9HRS3 Q9HRS3 | Putative uncharacterized protein                    |

| hit  | peptides | accession       | description                        |
|------|----------|-----------------|------------------------------------|
| 1402 |          | 1 Q9HHH6 Q9HHH6 | Vng6393h                           |
| 1419 |          | 1 Q9HQV0 Q9HQV0 | Putative uncharacterized protein   |
| 1425 |          | 1 Q9HSN8 Q9HSN8 | Putative uncharacterized protein   |
| 1466 |          | 1 Q9HPI3 Q9HPI3 | Cytochrome aa3 controlling protein |
| 1490 |          | 1 Q9HPQ9 KITH   | Thymidine kinase                   |
| 1548 |          | 1 Q9HHS4 Q9HHS4 | Vng6254c                           |
| 1588 |          | 1 Q9HSE3 Q9HSE3 | Putative uncharacterized protein   |
| 1633 |          | 1 Q9HNR9 Q9HNR9 | Putative uncharacterized protein   |
| 1647 |          | 1 Q9HHL8 Q9HHL8 | Vng6332h                           |
| 1665 |          | 1 Q9V2W4 RS13   | 30S ribosomal protein S13P         |
| 1668 |          | 1 Q9HHG7 Q9HHG7 | Vng6407h                           |
| 1677 |          | 1 Q9HM72 Q9HM72 | Putative uncharacterized protein   |
| 1680 |          | 1 Q9HPG0 Q9HPG0 | Putative uncharacterized protein   |
| 1707 |          | 1 Q9HR95 Q9HR95 | Putative uncharacterized protein   |

END OF LIST II

| hit                                                                                                       | peptides | accession   | description                                                                                                                       |
|-----------------------------------------------------------------------------------------------------------|----------|-------------|-----------------------------------------------------------------------------------------------------------------------------------|
| <b>III. Corynebacterium glutamicum membranes; elatsase digest; nLC-MALDI MS/MS; no search specificity</b> |          |             |                                                                                                                                   |
| 1                                                                                                         | 166      | P00772 ELA1 | Elastase-1 - Sus scrofa (Pig).                                                                                                    |
| 2                                                                                                         | 72       | Cg0446      | (sdhA) [C]: succinate dehydrogenase A (EC 1.3.99.1)                                                                               |
| 3                                                                                                         | 61       | Cg1537      | (ptsG) [M]: GLUCOSE-SPECIFIC ENZYME II BC COMPONENT OF PTS (EC 2.7.1.69)                                                          |
| 5                                                                                                         | 47       | Cg2409      | (ctaC) [M]: CYTOCHROME C OXIDASE CHAIN II (EC 1.9.3.1)                                                                            |
| 4                                                                                                         | 46       | Cg2705      | (amyE) [S]: MALTOSE-BINDING PROTEIN PRECURSOR                                                                                     |
| 6                                                                                                         | 46       | Cg0587      | (tuf) [C]: ELONGATION FACTOR TU                                                                                                   |
| 7                                                                                                         | 26       | Cg3138      | [M]: Membrane protease subunit, stomatin/prohibitin homolog                                                                       |
| 8                                                                                                         | 22       | Cg2911      | [S]: ABC-type Mn/Zn transport system, secreted Mn/Zn-binding (lipo)protein (surface adhesin)                                      |
| 9                                                                                                         | 22       | Cg3009      | [C]: hypothetical protein predicted by Glimmer/Critica                                                                            |
| 10                                                                                                        | 22       | Cg0447      | (sdhB) [C]: succinate dehydrogenase B                                                                                             |
| 12                                                                                                        | 21       | Cg2780      | (ctaD) [M]: PROBABLE CYTOCHROME C OXIDASE POLYPEPTIDE SUBUNIT (EC 1.9.3.1)                                                        |
| 15                                                                                                        | 19       | Cg2403      | (qcrB) [M]: CYTOCHROME B, MEMBRANE PROTEIN (EC 1.10.2.2)                                                                          |
| 13                                                                                                        | 18       | Cg1656      | (ndh) [MS]: NADH DEHYDROGENASE (EC 1.6.99.3)                                                                                      |
| 11                                                                                                        | 17       | Cg0583      | (fusA) [C]: ELONGATION FACTOR G                                                                                                   |
| 16                                                                                                        | 17       | Cg2843      | (pstB) [C]: ABC-type phosphate transport system, ATPase component                                                                 |
| 17                                                                                                        | 17       | Cg2404      | (qcrA1) [M]: RIESKE IRON-SULFUR PROTEIN                                                                                           |
| 14                                                                                                        | 14       | Cg0957      | (fas-IB) [C]: FATTY ACID SYNTHASE (EC 2.3.1.85, 2.3.1.38, 2.3.1.39, 2.3.1.41, 1.1.1.100, 4.2.1.60, 4.2.1.61, 1.3.1.10, 3.1.2.14)) |
| 18                                                                                                        | 13       | Cg2708      | (msiK1) [C]: ABC-type sugar transport system, ATPase component                                                                    |
| 19                                                                                                        | 12       | Cg1787      | (ppc) [C]: PHOSPHOENOLPYRUVATE CARBOXYLASE (EC 4.1.1.31)                                                                          |
| 21                                                                                                        | 12       | Cg0791      | (pyc) [C]: PYRUVATE CARBOXYLASE (EC 6.4.1.1)                                                                                      |
| 22                                                                                                        | 12       | Cg2875      | [C]: hypothetical protein predicted by Glimmer                                                                                    |
| 20                                                                                                        | 11       | Cg1368      | (atpD) [C]: ATP SYNTHASE ALPHA SUBUNIT (EC 3.6.1.34)                                                                              |
| 27                                                                                                        | 11       | Cg0445      | (sdhCD) [M]: succinate dehydrogenase CD                                                                                           |
| 23                                                                                                        | 10       | Cg2181      | [S]: ABC-type peptide transport system, secreted component                                                                        |
| 28                                                                                                        | 10       | Cg0924      | [S]: ABC-type cobalamin/Fe3+-siderophores transport sys                                                                           |
| 29                                                                                                        | 10       | Cg2196      | [M]: putative secreted or membrane protein                                                                                        |
| 26                                                                                                        | 9        | Cg3186      | (cmt2) [S]: Trehalose corynomycyl transferase (EC 2.3.1.122)                                                                      |
| 31                                                                                                        | 9        | Cg1437      | (ilvC) [C]: KETOL-ACID REDUCTOISOMERASE (EC 1.1.1.86)                                                                             |
| 33                                                                                                        | 9        | Cg0756      | (cstA) [M]: PUTATIVE CARBON STARVATION PROTEIN A                                                                                  |
| 37                                                                                                        | 9        | Cg1790      | (pgk) [C]: PHOSPHOGLYCERATE KINASE (EC 2.7.2.3)                                                                                   |
| 38                                                                                                        | 9        | Cg1366      | (atpA) [C]: PROBABLE ATP SYNTHASE ALPHA CHAIN PROTEIN (EC 3.6.1.34)                                                               |
| 40                                                                                                        | 9        | Cg2958      | (butA) [C]: L-2,3-butanediol dehydrogenase/acetoin reductase (EC 1.1.1.5)                                                         |
| 32                                                                                                        | 8        | Cg3227      | (lldA) [C]: PUTATIVE L-LACTATE DEHYDROGENASE (EC 1.1.2.3)                                                                         |
| 42                                                                                                        | 8        | Cg1429      | [M]: putative membrane protein                                                                                                    |
| 45                                                                                                        | 8        | Cg2211      | [M]: putative membrane protein                                                                                                    |
| 50                                                                                                        | 8        | Cg1685      | (tatX) [M]: Sec-independent protein secretion pathway component                                                                   |
| 51                                                                                                        | 8        | Cg2444      | [C]: hypothetical protein predicted by Glimmer/Critica                                                                            |

| hit | peptides | accession | description                                                                                                                      |
|-----|----------|-----------|----------------------------------------------------------------------------------------------------------------------------------|
| 24  |          | 7 Cg1081  | [C]: ABC-type multidrug transport system, ATPase component                                                                       |
| 25  |          | 7 Cg1111  | (eno) [C]: ENOLASE (EC 4.2.1.11)                                                                                                 |
| 30  |          | 7 Cg2405  | (qcrC) [M]: CYTOCHROME C1                                                                                                        |
| 34  |          | 7 Cg0766  | (icd) [C]: ISOCITRATE DEHYDROGENASE (EC 1.1.1.42)                                                                                |
| 36  |          | 7 Cg1290  | (metE) [C]: Homocysteine methyltransferase (EC 2.1.1.14)                                                                         |
| 54  |          | 7 Cg1880  | (thrS) [C]: THREONYL-TRNA SYNTHETASE (EC 6.1.1.3)                                                                                |
| 39  |          | 6 Cg2523  | (malQ) [C]: 4-ALPHA-GLUCANOTRANSFERASE (EC 2.4.1.25)                                                                             |
| 41  |          | 6 Cg2499  | (glyS) [C]: GLYCYL-TRNA SYNTHETASE (GLYCINE--TRNA LIGASE) (EC 6.1.1.14)                                                          |
| 43  |          | 6 Cg1791  | (gap) [C]: GLYCERALDEHYDE-3-PHOSPHATE DEHYDROGENASE (EC 1.2.1.12)                                                                |
| 44  |          | 6 Cg1001  | (mscL) [M]: LARGE CONDUCTANCE MECHANOSENSITIVE CHANNEL                                                                           |
| 46  |          | 6 Cg1737  | (acn) [C]: ACONITASE (EC 4.2.1.3)                                                                                                |
| 47  |          | 6 Cg0953  | [M]: Na+/proline, Na+/panthothenate symporter or related permease                                                                |
| 53  |          | 6 Cg3079  | (clpB) [C]: PROBABLE ATP-DEPENDENT PROTEASE (HEAT SHOCK PROTEIN) (EC 3.-.-.-)                                                    |
| 55  |          | 6 Cg0647  | (secY) [M]: preprotein translocase subunit SecY                                                                                  |
| 56  |          | 6 Cg2291  | (pyk) [C]: PYRUVATE KINASE (EC 2.7.1.40)                                                                                         |
| 57  |          | 6 Cg2840  | (actA) [C]: BUTYRYL-COA:ACETATE COENZYME A TRANSFERASE (EC 2.8.3.8)                                                              |
| 58  |          | 6 Cg1169  | [M]: Na+-dependent transporters of the SNF family                                                                                |
| 62  |          | 6 Cg3365  | (rmpC) [M]: putative ribitol transport membrane protein                                                                          |
| 73  |          | 6 Cg2558  | [C]: related to aldose 1-epimerase                                                                                               |
| 49  |          | 5 Cg0737  | [S]: ABC-type transport system, secreted lipoprotein component                                                                   |
| 59  |          | 5 Cg2845  | (pstC) [M]: ABC-type phosphate transport system, permease component                                                              |
| 60  |          | 5 Cg2949  | [S]: putative secreted protein                                                                                                   |
| 61  |          | 5 Cg1586  | (argG) [C]: ARGININOSUCCINATE SYNTHASE (EC 6.3.4.5)                                                                              |
| 65  |          | 5 Cg1556  | [C]: conserved hypothetical protein                                                                                              |
| 70  |          | 5 Cg0935  | [C]: conserved hypothetical protein                                                                                              |
| 76  |          | 5 Cg1363  | (atpE) [M]: ATP SYNTHASE C CHAIN (EC 3.6.1.34)                                                                                   |
| 94  |          | 5 Cg3008  | (porA) [M]: PORIN                                                                                                                |
| 99  |          | 5 Cg1121  | [M]: Permease of the major facilitator superfamily                                                                               |
| 120 |          | 5 Cg2703  | [M]: Sugar permease                                                                                                              |
| 35  |          | 4 Cg2743  | (fas-IA) [C]: FATTY ACID SYNTHASE (EC 2.3.1.85, 2.3.1.38, 2.3.1.39, 2.3.1.41, 1.1.1.100, 4.2.1.60, 4.2.1.61, 1.3.1.10, 3.1.2.14) |
| 48  |          | 4 Cg0576  | (rpoB) [C]: DNA-DIRECTED RNA POLYMERASE BETA CHAIN (EC 2.7.7.6)                                                                  |
| 52  |          | 4 Cg0545  | (pitA) [M]: PUTATIVE LOW-AFFINITY PHOSPHATE TRANSPORT PROTEIN                                                                    |
| 64  |          | 4 Cg1579  | [S]: putative secreted protein                                                                                                   |
| 66  |          | 4 Cg2137  | (gluB) [S]: GLUTAMATE SECRETED BINDING PROTEIN                                                                                   |
| 67  |          | 4 Cg2410  | (ItsA) [C]: glutamine-dependent amidotransferase involved in formation of cell wall and L-glutamate biosynthesis (EC 6.3.5.4)    |
| 68  |          | 4 Cg2195  | [M]: putative secreted or membrane protein                                                                                       |
| 74  |          | 4 Cg2799  | (pknE) [S]: putative secreted protein                                                                                            |
| 75  |          | 4 Cg2704  | [M]: ABC-type sugar transport system, permease component                                                                         |
| 78  |          | 4 Cg2192  | (mqo) [C]: MALATE:QUINONE OXIDOREDUCTASE OXIDOREDUCTASE (EC 1.1.99.16)                                                           |
| 79  |          | 4 Cg2695  | [C]: ABC-type transport system, ATPase component                                                                                 |

| hit | peptides | accession | description                                                                                             |
|-----|----------|-----------|---------------------------------------------------------------------------------------------------------|
| 80  | 4        | Cg3149    | [C]: Aminotransferases class-I                                                                          |
| 81  | 4        | Cg0834    | [S]: Bacterial extracellular solute-binding protein, fa                                                 |
| 83  | 4        | Cg2963    | (clpC) [C]: PROBABLE ATP-DEPENDENT PROTEASE (HEAT SHOCK PROTEIN) (EC 3.-.-.-)                           |
| 85  | 4        | Cg1203    | [C]: Mg-chelatase subunit ChII                                                                          |
| 89  | 4        | Cg2157    | (terC) [M]: TELLURIUM RESISTANCE MEMBRANE PROTEIN                                                       |
| 92  | 4        | Cg1362    | (atpB) [M]: ATP SYNTHASE F0 SUBUNIT 6 (EC 3.6.1.34)                                                     |
| 98  | 4        | Cg2466    | (aceE) [C]: PYRUVATE DEHYDROGENASE E1 COMPONENT (EC 1.2.4.1)                                            |
| 104 | 4        | Cg3219    | (ldh) [C]: L-LACTATE DEHYDROGENASE (EC 1.1.1.27)                                                        |
| 117 | 4        | Cg2096    | [M]: putative membrane protein                                                                          |
| 240 | 4        | Cg0952    | [M]: PUTATIVE INTEGRAL MEMBRANE PROTEIN                                                                 |
| 63  | 3        | Cg2120    | (ptsF) [M]: SUGAR SPECIFIC PTS SYSTEM, FRUCTOSE/MANNITOL-SPECIFIC TRANSPORT PROTEIN (EC 2.7.1.69)       |
| 72  | 3        | Cg0703    | (guaA) [C]: PUTATIVE GMP SYNTHASE (EC 6.3.5.2)                                                          |
| 77  | 3        | Cg2900    | (ddh) [C]: MESO-DIAMINOPIMELATE DEHYDROGENASE (EC 1.4.1.16)                                             |
| 84  | 3        | Cg0414    | (wzz) [M]: cell surface polysaccharide biosynthesis / Chain length determinant protein                  |
| 86  | 3        | Cg1813    | (carB) [C]: PUTATIVE CARBAMOYL-PHOSPHATE SYNTHASE SUBUNIT (EC 6.3.5.5)                                  |
| 91  | 3        | Cg0896    | [M]: membrane protein                                                                                   |
| 95  | 3        | Cg1525    | (polA) [C]: DNA POLYMERASE I (EC 2.7.7.7)                                                               |
| 96  | 3        | Cg0610    | (rplE) [C]: 50S RIBOSOMAL PROTEIN L5                                                                    |
| 100 | 3        | Cg0238    | [C]: L-GULONOLACTONE OXIDASE (EC 1.1.3.8)                                                               |
| 102 | 3        | Cg2166    | (gpsI) [C]: PUTATIVE POLYRIBONUCLEOTIDE PHOSPHORYLASE / GUANOSINE PENTAPHOSPHATESYNTHETASE (EC 2.7.7.8) |
| 113 | 3        | Cg3195    | [C]: Flavin-containing monooxygenase (FMO)                                                              |
| 118 | 3        | Cg1643    | (gnd) [C]: 6-PHOSPHOGLUCONATE DEHYDROGENASE (EC 1.1.1.44)                                               |
| 124 | 3        | Cg1238    | [M]: putative membrane protein                                                                          |
| 127 | 3        | Cg2406    | (ctaE) [M]: CYTOCHROME C OXIDASE SUBUNIT 3 (EC 1.9.3.1)                                                 |
| 151 | 3        | Cg0472    | [C]: conserved hypothetical protein                                                                     |
| 157 | 3        | Cg0007    | (gyrB) [C]: DNA GYRASE SUBUNIT B (EC 5.99.1.3)                                                          |
| 220 | 3        | Cg2613    | (mdh) [C]: MALATE DEHYDROGENASE OXIDOREDUCTASE PROTEIN (EC 1.1.1.37)                                    |
| 239 | 3        | Cg1227    | [M]: putative membrane protein                                                                          |
| 303 | 3        | Cg4005    | [S]: putative secreted protein                                                                          |
| 311 | 3        | Cg1911    | [S]: putative secreted protein                                                                          |
| 353 | 3        | Cg1164    | (lytB) [C]: Penicillin tolerance protein                                                                |
| 475 | 3        | Cg2325    | [C]: hypothetical protein predicted by Glimmer/Critica                                                  |
| 69  | 2        | Cg0577    | (rpoC) [C]: DNA-DIRECTED RNA POLYMERASE BETA~ CHAIN (EC 2.7.7.6)                                        |
| 71  | 2        | Cg1280    | (odhA) [C]: 2-OXOGLUTARATE DEHYDROGENASE (EC 1.2.4.2)                                                   |
| 82  | 2        | Cg1451    | (serA) [C]: Phosphoglycerate Dehydrogenase (EC 1.1.1.95)                                                |
| 88  | 2        | Cg1603    | [MS]: CONSERVED MEMBRANE PROTEIN                                                                        |
| 105 | 2        | Cg2496    | [S]: putative secreted protein                                                                          |
| 108 | 2        | Cg1463    | (gltS) [C]: PUTATIVE GLUTAMYL-TRNA SYNTHETASE (EC 6.1.1.17)                                             |
| 110 | 2        | Cg2492    | (glmS) [C]: PROBABLE GLUCOSAMINE--FRUCTOSE-6-PHOSPHATE AMINOTRANSFERASE (EC 2.6.1.16)                   |
| 114 | 2        | Cg0047    | [M]: conserved hypothetical protein                                                                     |

| hit | peptides | accession | description                                                                        |
|-----|----------|-----------|------------------------------------------------------------------------------------|
| 115 | 2        | Cg0303    | (leuA) [C]: 2-ISOPROPYLMALATE SYNTHASE (EC 4.1.3.12)                               |
| 116 | 2        | Cg0654    | (rpsD) [C]: RIBOSOMAL PROTEIN S4                                                   |
| 121 | 2        | Cg3100    | (dnaK) [C]: Heat shock protein hsp70                                               |
| 122 | 2        | Cg2333    | (treZ) [C]: MALTO-OLIGOSYLTREHALOSE TREHALOHYDROLASE (EC 3.2.1.141)                |
| 123 | 2        | Cg3154    | (udgA2) [C]: UDP-GLUCOSE 6-DEHYDROGENASE (EC 1.1.1.22)                             |
| 134 | 2        | Cg1725    | (mcmB) [C]: METHYLMALONYL-COA MUTASE LARGE SUBUNIT (EC 5.4.99.2)                   |
| 137 | 2        | Cg2678    | [S]: ABC-type dipeptide/oligopeptide/nickel transport systems, secreted component  |
| 138 | 2        | Cg1364    | (atpF) [MS]: ATP synthase B chain (EC 3.6.1.34)                                    |
| 153 | 2        | Cg0683    | [M]: permease                                                                      |
| 155 | 2        | Cg2571    | (lepA) [C]: Membrane GTPase LepA                                                   |
| 156 | 2        | Cg3237    | (sod) [C]: MANGANESE SUPEROXIDE DISMUTASE (EC 1.15.1.1)                            |
| 164 | 2        | Cg1133    | (glyA) [C]: Serine Hydroxymethyltransferase (EC 2.1.2.1)                           |
| 181 | 2        | Cg2925    | (ptsS) [M]: ENZYME II SUCROSE PROTEIN (EC 2.7.1.69)                                |
| 193 | 2        | Cg0326    | (nuoL) [M]: NADH-QUINONE OXIDOREDUCTASE CHAIN 5 (EC 1.6.5.3)                       |
| 196 | 2        | Cg1836    | [S]: secreted solute-binding protein, aminodeoxychorismate lyase-like              |
| 218 | 2        | Cg2470    | [S]: SECRETED ABC TRANSPORTER SUBSTRATE-BINDING PROTEIN                            |
| 228 | 2        | Cg3244    | [C]: conserved hypothetical protein                                                |
| 232 | 2        | Cg2437    | (thrC) [C]: THREONINE SYNTHASE (EC 4.2.99.2)                                       |
| 236 | 2        | Cg1365    | (atpH) [C]: H <sup>+</sup> -ATPASE DELTA SUBUNIT                                   |
| 243 | 2        | Cg0559    | (ispB) [C]: PUTATIVE OCTAPRENYL-DIPHOSPHATE SYNTHASE PROTEIN ( (EC 2.5.1.)         |
| 244 | 2        | Cg3323    | [C]: Myo-inositol-1-phosphate synthase                                             |
| 246 | 2        | Cg1229    | [M]: ABC-type cobalt transport system, permease component CbiQ                     |
| 269 | 2        | Cg2846    | (pstS) [S]: ABC-type phosphate transport system, secreted component                |
| 278 | 2        | Cg0508    | [S]: iron/thiamine transport system, secreted component                            |
| 284 | 2        | Cg0153    | (hde) [C]: PROBABLE ESTERASE/LIPASE PROTEIN (EC 3.1.1.-)                           |
| 349 | 2        | Cg1829    | (aroC) [C]: PUTATIVE CHORISMATE SYNTHASE (EC 4.6.1.4)                              |
| 351 | 2        | Cg0040    | [S]: PUTATIVE SECRETED PROTEIN                                                     |
| 357 | 2        | Cg0451    | [M]: PUTATIVE MEMBRANE PROTEIN                                                     |
| 360 | 2        | Cg1128    | [MS]: similar to ribosomal protein S2                                              |
| 372 | 2        | Cg1005    | (moeA2) [C]: MOLYBDENUM COFACTOR BIOSYNTHESIS PROTEIN                              |
| 416 | 2        | Cg2052    | [S]: putative secreted protein                                                     |
| 441 | 2        | Cg0936    | (rpf1) [S]: RPF PROTEIN PRECURSOR                                                  |
| 570 | 2        | Cg1665    | [S]: putative secreted protein                                                     |
| 674 | 2        | Cg3343    | [M]: putative secreted membrane protein                                            |
| 756 | 2        | Cg1874    | [M]: putative membrane protein                                                     |
| 857 | 2        | Cg3257    | [C]: conserved hypothetical protein                                                |
| 977 | 2        | Cg1904    | [M]: putative membrane protein                                                     |
| 90  | 1        | Cg2984    | (ftsH) [M]: CELL-DIVISION PROTEIN (ATP-DEPENDENT ZN METALLOPEPTIDASE) (EC 3.4.24.) |
| 103 | 1        | Cg1314    | (putP) [M]: PROLINE TRANSPORT SYSTEM                                               |
| 107 | 1        | Cg0656    | (rplQ) [C]: 50S RIBOSOMAL PROTEIN L17                                              |

| hit | peptides | accession | description                                                                               |
|-----|----------|-----------|-------------------------------------------------------------------------------------------|
| 109 | 1        | Cg0835    | (msiK2) [C]: ABC-type sugar transport systems, ATPase component                           |
| 119 | 1        | Cg0235    | (embC) [M]: Probable arabinosyltransferase, membrane protein                              |
| 125 | 1        | Cg0161    | [M]: putative secreted or membrane protein                                                |
| 143 | 1        | Cg2586    | (proA) [C]: GAMMA-GLUTAMYL PHOSPHATE REDUCTASE (EC 1.2.1.41)                              |
| 144 | 1        | Cg2292    | (lgt) [M]: PUTATIVE PROLIPOPROTEIN DIACYLGLYCEROL TRANSFERASE (EC 2.4.99.)                |
| 148 | 1        | Cg3182    | (cop1) [S]: Trehalose corynomycolyl transferase (EC 2.3.1.122)                            |
| 149 | 1        | Cg2811    | [M]: ABC-type transport system, involved in lipoprotein release, permease component       |
| 150 | 1        | Cg0658    | [M]: putative membrane protein                                                            |
| 161 | 1        | Cg1234    | [C]: putative excinuclease ATPase subunit - UvrA-like protein                             |
| 165 | 1        | Cg0062    | (ppp) [M]: PROTEIN PHOSPHATASE (EC 3.1.3.16)                                              |
| 168 | 1        | Cg2833    | (cysK) [C]: O-Acetylserine (Thiol)-Lyase (EC 4.2.99.8)                                    |
| 173 | 1        | Cg2262    | (ftsY) [S]: Signal recognition particle GTPase                                            |
| 175 | 1        | Cg3018    | [C]: hypothetical protein predicted by Glimmer/Critica                                    |
| 176 | 1        | Cg3191    | [C]: Predicted glycosyltransferase                                                        |
| 182 | 1        | Cg1082    | [M]: putative membrane protein                                                            |
| 186 | 1        | Cg3220    | [M]: putative membrane protein                                                            |
| 189 | 1        | Cg0336    | (ponA) [S]: PENICILLIN-BINDING PROTEIN 1B (EC 2.4.2.-)                                    |
| 199 | 1        | Cg1861    | (rel) [C]: PPGPP SYNTHETASE, PPGPP PYROPHOSPHORYLASE (EC 2.7.6.5, 3.1.7.2)                |
| 200 | 1        | Cg1841    | (aspS) [C]: PROBABLE ASPARTYL-TRNA SYNTHETASE PROTEIN (EC 6.1.1.12)                       |
| 202 | 1        | Cg0854    | (pmmA) [C]: PHOSPHOMANNOMUTASE (EC 5.4.2.8)                                               |
| 203 | 1        | Cg0410    | [C]: PUTATIVE PROLYL ENDOPEPTIDASE (EC 3.4.21.26)                                         |
| 204 | 1        | Cg1195    | [M]: Sulfate permease or related transporter (MFS superfamily)                            |
| 207 | 1        | Cg2657    | [MS]: putative membrane protein - fragment                                                |
| 212 | 1        | Cg1345    | (narK) [M]: PUTATIVE NITRATE/NITRITE TRANSPORTER                                          |
| 215 | 1        | Cg0783    | [C]: conserved hypothetical protein                                                       |
| 223 | 1        | Cg1502    | [C]: ABC-type polar amino acid transport system, ATPase component                         |
| 224 | 1        | Cg3161    | [M]: putative membrane protein                                                            |
| 227 | 1        | Cg0602    | (rplP) [C]: 50S RIBOSOMAL PROTEIN L16                                                     |
| 229 | 1        | Cg0523    | [M]: membrane protein required for cytochrome c biosynthesis                              |
| 235 | 1        | Cg3429    | [M]: Preprotein translocase subunit YidC                                                  |
| 237 | 1        | Cg2800    | (pgm) [C]: PHOSPHOGLUCOMUTASE (EC 5.4.2.2)                                                |
| 238 | 1        | Cg2176    | (infB) [C]: Translation initiation factor 2 (GTPase)                                      |
| 247 | 1        | Cg1435    | (ilvB) [C]: ACETOLACTATE SYNTHASE (EC 4.1.3.18)                                           |
| 249 | 1        | Cg0928    | [C]: ABC-type cobalamin/Fe <sup>3+</sup> -siderophores transport system, ATPase component |
| 251 | 1        | Cg1456    | [C]: Predicted signal-transduction protein containing cAMP-binding and CBS domain         |
| 252 | 1        | Cg2527    | (dcp) [C]: PROBABLE PEPTIDYL-DIPEPTIDASE A PROTEIN (EC 3.4.15.1)                          |
| 260 | 1        | Cg2675    | [C]: ATPase component of ABC-type transport system, contains duplicated ATPase domains    |
| 263 | 1        | Cg3011    | (groEL) [C]: Chaperonin cpn60 (60Kd subunit)                                              |
| 264 | 1        | Cg2092    | (sigA) [S]: RNA POLYMERASE SIGMA 70 FACTOR                                                |
| 270 | 1        | Cg1562    | [M]: putative membrane protein                                                            |

| hit | peptides | accession | description                                                                                |
|-----|----------|-----------|--------------------------------------------------------------------------------------------|
| 273 | 1        | Cg3405    | [C]: NADPH quinone reductase or Zn-dependent oxidoreductase                                |
| 275 | 1        | Cg2372    | (mraY) [M]: PHOSPHO-N-ACETYLMURAMOYL-PENTAPEPTIDE-TRANSFERASE (EC 2.7.8.13)                |
| 280 | 1        | Cg2261    | (amtB) [M]: LOW AFFINITY AMMONIUM UPTAKE PROTEIN                                           |
| 283 | 1        | Cg2151    | [C]: Similar to phage shock protein A                                                      |
| 287 | 1        | Cg3189    | [M]: 4-hydroxybenzoate polyprenyltransferase or related prenyltransferase                  |
| 291 | 1        | Cg0249    | [M]: polysaccharide/polyol phosphate export systems, permease component                    |
| 292 | 1        | Cg3255    | (uspA3) [C]: UNIVERSAL STRESS PROTEIN FAMILY                                               |
| 295 | 1        | Cg0915    | (ftsX) [M]: PUTATIVE CELL DIVISION PROTEIN                                                 |
| 310 | 1        | Cg2968    | [C]: conserved hypothetical protein                                                        |
| 314 | 1        | Cg1794    | [C]: Uncharacterised P-loop ATPase protein                                                 |
| 321 | 1        | Cg0250    | [C]: AMINOTRANSFERASE                                                                      |
| 323 | 1        | Cg1582    | (argB) [C]: ACETYLGLUTAMATE KINASE (EC 2.7.2.8)                                            |
| 326 | 1        | Cg0949    | (gltA) [C]: CITRATE SYNTHASE (EC 4.1.3.7)                                                  |
| 328 | 1        | Cg0134    | [C]: HYDROLASE, AMA/HIPO/HYUC FAMILY                                                       |
| 335 | 1        | Cg0327    | [M]: membrane protein                                                                      |
| 343 | 1        | Cg1109    | (porB) [S]: Anion-specific porin precursor                                                 |
| 344 | 1        | Cg0464    | (ctpA) [M]: COPPER-TRANSPORTING ATPASE (EC 3.6.1.36)                                       |
| 348 | 1        | Cg2361    | [C]: Cell division initiation protein - Antigen 84 homolog                                 |
| 350 | 1        | Cg1268    | (glgA) [C]: GLYCOSYL TRANSFERASE                                                           |
| 359 | 1        | Cg2300    | (hisH) [C]: IMIDAZOLEGLYCEROL-PHOSPHATE SYNTHASE, AMIDOTRANSFERASE (EC 2.4.2.)             |
| 366 | 1        | Cg1629    | (secA2) [C]: Similar to preprotein translocase subunit SecA                                |
| 370 | 1        | Cg1594    | (tyrS) [C]: TYROSYL-TRNA SYNTHETASE (EC 6.1.1.1)                                           |
| 376 | 1        | Cg1333    | (argS) [C]: ARGINYL-TRNA SYNTHETASE (EC 6.1.1.19)                                          |
| 388 | 1        | Cg1855    | (hisS) [C]: HISTIDYL-TRNA SYNTHETASE (EC 6.1.1.21)                                         |
| 392 | 1        | Cg0528    | [S]: putative secreted protein                                                             |
| 399 | 1        | Cg0085    | (phoH1) [C]: ATPase related to phosphate starvation-inducible protein                      |
| 403 | 1        | Cg1418    | [S]: ABC-type cobalamin/Fe <sup>3+</sup> -siderophores transport system secreted component |
| 412 | 1        | Cg2862    | (purL) [C]: PHOSPHORIBOSYLFORMYLGLYCINAMIDINE SYNTHASE (EC 6.3.5.3)                        |
| 413 | 1        | Cg2474    | (nagD) [C]: PUTATIVE PHOSPHATASE IN N-ACETYLGLUCOSAMINE METABOLISM                         |
| 414 | 1        | Cg3049    | (fprA) [S]: PUTATIVE FERREDOXIN/FERREDOXIN-NADP REDUCTASE (EC 1.18.1.2)                    |
| 419 | 1        | Cg0291    | [C]: 3,4-dioxygenase beta subunit                                                          |
| 421 | 1        | Cg3069    | [C]: conserved hypothetical protein                                                        |
| 422 | 1        | Cg0237    | [C]: PUTATIVE OXIDOREDUCTASE                                                               |
| 426 | 1        | Cg0413    | (cmt1) [S]: Trehalose corynomycyl transferase (EC 2.3.1.122)                               |
| 428 | 1        | Cg1796    | (ribX) [M]: putative membrane protein - C. ammoniagenes RibX homolog                       |
| 430 | 1        | Cg2510    | (bex) [C]: BEX PROTEIN (GTP-BINDING PROTEIN ERA HOMOLOG)                                   |
| 435 | 1        | Cg0867    | [C]: Ribosome-associated protein Y (PSrp-1)                                                |
| 437 | 1        | Cg2408    | [M]: putative membrane protein                                                             |
| 438 | 1        | Cg2235    | (rplS) [C]: 50S RIBOSOMAL PROTEIN L19                                                      |
| 443 | 1        | Cg1859    | [S]: putative secreted protein                                                             |



| hit | peptides | accession | description                                                                                       |
|-----|----------|-----------|---------------------------------------------------------------------------------------------------|
| 454 | 1        | Cg3107    | (adhA) [C]: Zn-dependent alcohol dehydrogenase (EC 1.1.1.1)                                       |
| 457 | 1        | Cg1228    | [C]: ABC-type cobalt transport system, ATPase component                                           |
| 469 | 1        | Cg1789    | (tpi) [C]: TRIOSEPHOSPHATE ISOMERASE (EC 5.3.1.1)                                                 |
| 472 | 1        | Cg0628    | (rpsH) [C]: RIBOSOMAL PROTEIN S8                                                                  |
| 477 | 1        | Cg0779    | (trpS) [C]: TRYPTOPHAN TRNA SYNTHETASE (EC 6.1.1.2)                                               |
| 488 | 1        | Cg0680    | [C]: conserved hypothetical protein                                                               |
| 489 | 1        | Cg2199    | (pbp) [S]: PENICILLIN-BINDING PROTEIN, PUTATIVE D-ALANYL-D-ALANINE CARBOXYPEPTIDASE (EC 3.4.16.4) |
| 490 | 1        | Cg1574    | (pheS) [C]: PHENYLALANYL-TRNA SYNTHETASE ALPHA CHAIN (EC 6.1.1.20)                                |
| 493 | 1        | Cg2368    | (murC) [C]: PROBABLE UDP-N-ACETYLMURAMATE--ALANINE LIGASE PROTEIN (EC 6.3.2.8)                    |
| 512 | 1        | Cg1436    | (ilvN) [C]: ACETOHYDROXYACID SYNTHASE SMALL SUBUNIT (EC 4.1.3.18)                                 |
| 517 | 1        | Cg1337    | (hom) [C]: Homoserine Dehydrogenase (EC 1.1.1.3)                                                  |
| 537 | 1        | Cg3096    | [C]: ALDEHYDE DEHYDROGENASE (EC 1.2.1.3)                                                          |
| 539 | 1        | Cg2841    | [C]: Predicted TIM-barrel enzyme, possibly dehydrogenase, nifR3 family                            |
| 543 | 1        | Cg2876    | (purB) [C]: ADENYLOSUCCINATE LYASE (EC 4.3.2.2)                                                   |
| 557 | 1        | Cg2154    | (pgsA2) [M]: CDP-DIACYLGLYCEROL--GLYCEROL-3-PHOSPHATE 3-PHOSPHATIDYLTRANSFERASE (EC 2.7.8.5)      |
| 559 | 1        | Cg1604    | [S]: putative secreted protein                                                                    |
| 564 | 1        | Cg2100    | [C]: rRNA or tRNA methylase                                                                       |
| 565 | 1        | Cg1247    | [S]: putative secreted protein                                                                    |
| 568 | 1        | Cg2440    | [M]: Permease of the major facilitator superfamily                                                |
| 571 | 1        | Cg3068    | (fda) [C]: fructose-bisphosphate aldolase (EC 4.1.2.13)                                           |
| 590 | 1        | Cg0939    | [S]: secreted protein                                                                             |
| 592 | 1        | Cg0655    | (rpoA) [C]: DNA-DIRECTED RNA POLYMERASE ALPHA SUBUNIT (EC 2.7.7.6)                                |
| 595 | 1        | Cg3325    | [C]: conserved hypothetical protein                                                               |
| 597 | 1        | Cg0565    | [C]: PUTATIVE TRANSCRIPTIONAL REGULATOR                                                           |
| 610 | 1        | Cg0873    | (aroA) [C]: 3-PHOSPHOSHIKIMATE 1-CARBOXYVINYLTRANSFERASE (EC 2.5.1.19)                            |
| 616 | 1        | Cg2418    | (ilvE) [C]: BRANCHED-CHAIN AMINO ACID AMINOTRANSFERASE (EC 2.6.1.42)                              |
| 625 | 1        | Cg0489    | [M]: hypothetical membrane protein                                                                |
| 631 | 1        | Cg0933    | [C]: DNA or RNA helicase of superfamily II                                                        |
| 642 | 1        | Cg0564    | (rplA) [C]: 50S RIBOSOMAL PROTEIN L1                                                              |
| 644 | 1        | Cg0442    | (galU2) [C]: PUTATIVE UTP-GLUCOSE-1-PHOSPHATE URIDYLTRANSFERASE (EC 2.7.7.9)                      |
| 648 | 1        | Cg1641    | [C]: Superfamily II DNA or RNA helicase                                                           |
| 656 | 1        | Cg1432    | (ilvD) [C]: DIHYDROXY-ACID DEHYDRATASE (EC 4.2.1.9)                                               |
| 662 | 1        | Cg2342    | [C]: Dehydrogenase                                                                                |
| 667 | 1        | Cg2994    | [S]: putative secreted or membrane protein                                                        |
| 671 | 1        | Cg2924    | (cysS) [C]: CYSTEINE TRNA SYNTHETASE (EC 6.1.1.16)                                                |
| 692 | 1        | Cg1129    | (aroF) [C]: PROBABLE PHOSPHO-2-DEHYDRO-3-DEOXYHEPTONATE ALDOLASE (EC 4.1.2.15)                    |
| 694 | 1        | Cg2460    | [M]: putative membrane protein                                                                    |
| 698 | 1        | Cg1730    | [S]: secreted protease subunit, stomatin/prohibitin homolog                                       |
| 703 | 1        | Cg1069    | (gapX) [C]: similar to GLYCERALDEHYDE-3-PHOSPHATE DEHYDROGENASE (EC 1.2.1.12)                     |
| 704 | 1        | Cg1764    | (sufB) [C]: component of an uncharacterized iron-regulated ABC-type transporter                   |

| hit  | peptides | accession | description                                                                       |
|------|----------|-----------|-----------------------------------------------------------------------------------|
| 706  | 1        | Cg1675    | [M]: putative membrane protein                                                    |
| 709  | 1        | Cg2890    | [C]: PUTATIVE AMINO ACID PROCESSING ENZYME                                        |
| 710  | 1        | Cg2676    | [M]: ABC-type dipeptide/oligopeptide/nickel transport systems, permease component |
| 714  | 1        | Cg0594    | (rplC) [C]: 50S RIBOSOMAL PROTEIN L3                                              |
| 735  | 1        | Cg3387    | [M]: Permease of the major facilitator superfamily                                |
| 755  | 1        | Cg1458    | [C]: 2-HYDROXYHEPTA-2,4-DIENE- 1,7-DIOATE ISOMERASE (EC 5.3.3.-)                  |
| 788  | 1        | Cg2467    | [C]: ABC TRANSPORTER ATP-BINDING PROTEIN                                          |
| 820  | 1        | Cg1623    | [M]: Predicted divalent heavy-metal cations transporter                           |
| 824  | 1        | Cg1646    | [C]: ABC-type multidrug transport system, ATPase component                        |
| 830  | 1        | Cg3240    | [M]: Permease of the major facilitator superfamily                                |
| 834  | 1        | Cg3304    | (dnaB) [C]: PUTATIVE REPLICATIVE DNA HELICASE (EC 3.6.1.)                         |
| 841  | 1        | Cg1740    | [C]: putative nucleoside-diphosphate-sugar epimerase                              |
| 850  | 1        | Cg0396    | [M]: Glycosyl transferase                                                         |
| 870  | 1        | Cg2362    | [M]: putative membrane protein                                                    |
| 884  | 1        | Cg0914    | (ftsE) [C]: CELL DIVISION ATP-BINDING PROTEIN                                     |
| 887  | 1        | Cg3160    | [S]: putative secreted protein                                                    |
| 893  | 1        | Cg2619    | [M]: Predicted permease                                                           |
| 899  | 1        | Cg2561    | (thiX) [S]: secreted protein potentially involved into thiamin biosynthesis       |
| 958  | 1        | Cg3215    | (glpQ1) [C]: PUTATIVE GLYCEROPHOSPHORYL DIESTER PHOSPHODIESTERASE (EC 3.1.4.46)   |
| 967  | 1        | Cg0620    | [S]: secreted protein                                                             |
| 979  | 1        | Cg0475    | [C]: conserved hypothetical protein                                               |
| 988  | 1        | Cg0573    | (rplL) [C]: PROBABLE 50S RIBOSOMAL SUBUNIT PROTEIN L7/L12                         |
| 989  | 1        | Cg1341    | (narI) [M]: RESPIRATORY NITRATE REDUCTASE 2 GAMMA CHAIN (EC 1.7.99.4)             |
| 990  | 1        | Cg1505    | [S]: putative secreted protein                                                    |
| 1002 | 1        | Cg3407    | [M]: putative membrane protein                                                    |
| 1010 | 1        | Cg2954    | (cynT) [C]: CARBONIC ANHYDRASE (EC 4.2.1.1)                                       |
| 1020 | 1        | Cg2604    | [M]: putative secreted or membrane protein                                        |
| 1052 | 1        | Cg0674    | (rpsI) [C]: 30S RIBOSOMAL PROTEIN S9                                              |
| 1057 | 1        | Cg0359    | [M]: PUTATIVE MEMBRANE PROTEIN                                                    |
| 1058 | 1        | Cg1731    | [M]: Membrane protein implicated in regulation of membrane protease activity      |
| 1080 | 1        | Cg0556    | (ubiE) [C]: UBIQUINONE/MENAQUINONE BIOSYNTHESIS METHYLTRANSFER (EC 2.1.1.-)       |
| 1117 | 1        | Cg1635    | [M]: putative membrane protein                                                    |
| 1121 | 1        | Cg1092    | [S]: putative secreted protein                                                    |
| 1132 | 1        | Cg1312    | [M]: putative membrane protein                                                    |
| 1139 | 1        | Cg0653    | (rpsK) [C]: RIBOSOMAL PROTEIN S11                                                 |
| 1145 | 1        | Cg3254    | [M]: putative membrane protein                                                    |
| 1148 | 1        | Cg3361    | (trpD) [C]: ANTHRANILATE PHOSPHORIBOSYLTRANSFERASE (EC 2.4.2.18)                  |
| 1195 | 1        | Cg1811    | (ihf) [C]: putative integration host factor cIHF                                  |
| 1215 | 1        | Cg2033    | [S]: putative secreted protein                                                    |
| 1220 | 1        | Cg0726    | [S]: secreted lipoprotein                                                         |

| hit  | peptides | accession | description                                                           |
|------|----------|-----------|-----------------------------------------------------------------------|
| 1231 | 1        | Cg1072    | (rpIY) [C]: Ribosomal protein L25 (general stress protein Ctc)        |
| 1236 | 1        | Cg0609    | (rpIX) [C]: 50S RIBOSOMAL PROTEIN L24                                 |
| 1276 | 1        | Cg1672    | (ppmC) [C]: polyprenol-phosphate-mannose synthase domain 1            |
| 1319 | 1        | Cg2535    | [S]: putative secreted protein                                        |
| 1345 | 1        | Cg3367    | [C]: ABC-type multidrug transport system, ATPase component            |
| 1346 | 1        | Cg3353    | (benK2) [M]: putative benzoate transport protein                      |
| 1413 | 1        | Cg1694    | (recB) [C]: RecB family exonuclease                                   |
| 1414 | 1        | Cg1568    | (ugpA) [M]: sn-Glycerol-3-phosphate transport system permease protein |
| 1426 | 1        | Cg0412    | [M]: membrane protein                                                 |
| 1433 | 1        | Cg3139    | [C]: conserved hypothetical protein                                   |
| 1436 | 1        | Cg1810    | (gmk) [C]: PROBABLE GUANYLATE KINASE PROTEIN (EC 2.7.4.8)             |
| 1481 | 1        | Cg1085    | [C]: hypothetical protein predicted by Glimmer/Critica                |
| 1483 | 1        | Cg0600    | (rpIV) [C]: RIBOSOMAL PROTEIN L22                                     |
| 1506 | 1        | Cg1751    | [M]: putative membrane protein                                        |
| 1525 | 1        | Cg0561    | (secE) [M]: SecE subunit of protein translocation complex             |
| 1526 | 1        | Cg0524    | (ccsB) [M]: Cytochrome c assembly membrane protein                    |
| 1529 | 1        | Cg2737    | [S]: Bacterial regulatory protein, tetR family                        |
| 1543 | 1        | Cg1259    | (dapD2) [C]: similar to tetrahydrodipicolinate N-succinyltransferase  |
| 1559 | 1        | Cg0652    | (rpsM) [C]: (Q9RA65) RIBOSOMAL PROTEIN S13                            |
| 1582 | 1        | Cg2773    | [C]: Uncharacterized protein with SCP/PR1 domain                      |
| 1698 | 1        | Cg0966    | (thyA) [C]: PROBABLE THYMIDYLATE SYNTHASE (EC 2.1.1.45)               |
| 1748 | 1        | Cg2735    | [M]: putative membrane protein                                        |

END OF LIST III

| hit                                                                                 | peptides | accession     | description                                             |
|-------------------------------------------------------------------------------------|----------|---------------|---------------------------------------------------------|
| <b>IV. Purple membrane; elastase digest; nLC-MALDI MS/MS; no search specificity</b> |          |               |                                                         |
| 1                                                                                   | 120      | P02945 BACR   | Bacteriorhodopsin                                       |
| 2                                                                                   | 72       | P00772 ELA1   | Elastase-1 precursor - Sus scrofa                       |
| 3                                                                                   | 54       | Q9HMW9 Q9HMW  | Dipeptide ABC transporter dipeptide-binding             |
| 4                                                                                   | 22       | Q9HR99 Q9HR99 | Halocyanin-like                                         |
| 5                                                                                   | 22       | Q9HN93 Q9HN93 | Halocyanin-like                                         |
| 7                                                                                   | 22       | Q48302 Q48302 | Precursor proteolipid                                   |
| 6                                                                                   | 20       | Q9HMI3 Q9HMI3 | Dipeptide ABC transporter ATP-binding                   |
| 8                                                                                   | 18       | Q9HHN1 Q9HHN1 | Na <sup>+</sup> /H <sup>+</sup> antiporter              |
| 10                                                                                  | 15       | Q9HM69 CSG    | Cell surface glycoprotein                               |
| 12                                                                                  | 14       | Q9HMG3 Q9HMG3 | Putative uncharacterized protein                        |
| 13                                                                                  | 12       | Q9HRQ9 Q9HRQ9 | Putative uncharacterized protein                        |
| 16                                                                                  | 12       | Q9HSS1 Q9HSS1 | Phosphoglycerate dehydrogenase                          |
| 14                                                                                  | 10       | Q9HSA8 Q9HSA8 | Bifunctional short chain isoprenyl diphosphate synthase |
| 15                                                                                  | 10       | Q9HRS0 Q9HRS0 | Putative uncharacterized protein                        |
| 17                                                                                  | 10       | Q9HN95 Q9HN95 | Cytochrome c oxidase subunit I                          |
| 22                                                                                  | 7        | Q9HND8 VATI   | V-type ATP synthase subunit I                           |
| 19                                                                                  | 6        | Q9HRL3 Q9HRL3 | F420H2:quinone oxidoreductase chain L                   |
| 20                                                                                  | 6        | Q9HMF1 Q9HMF1 | Aconitase                                               |
| 21                                                                                  | 6        | Q9HMT7 Q9HMT7 | Probable thiosulfate sulfurtransferase                  |
| 24                                                                                  | 6        | Q9HRR0 Q9HRR0 | Putative uncharacterized protein                        |
| 18                                                                                  | 5        | Q9HN94 Q9HN94 | Cytochrome c oxidase subunit II                         |
| 32                                                                                  | 5        | Q9HMW4 Q9HMW  | Oligopeptide binding protein                            |
| 25                                                                                  | 4        | Q9HSQ7 Q9HSQ7 | ABC transport protein                                   |
| 26                                                                                  | 4        | Q9HRL1 Q9HRL1 | NADH dehydrogenase/oxidoreductase                       |
| 29                                                                                  | 4        | Q9HHP3 Q9HHP3 | Vng6297c                                                |
| 36                                                                                  | 4        | Q9HM89 EF1A   | Elongation factor 1-alpha                               |
| 41                                                                                  | 4        | Q9HNL7 Q9HNL7 | Putative uncharacterized protein                        |
| 49                                                                                  | 4        | Q9HMU9 Q9HMU9 | Nitrite/nitrate reduction protein                       |
| 23                                                                                  | 3        | Q9HRR1 Q9HRR1 | Putative uncharacterized protein                        |
| 27                                                                                  | 3        | Q9HNB9 Q9HNB9 | Putative uncharacterized protein                        |
| 31                                                                                  | 3        | Q9HQA6 Q9HQA6 | Putative uncharacterized protein                        |
| 33                                                                                  | 3        | Q9HQF4 Q9HQF4 | Membrane protein                                        |
| 34                                                                                  | 3        | Q9HRL8 Q9HRL8 | NADH dehydrogenase/oxidoreductase                       |
| 35                                                                                  | 3        | Q9HMX1 Q9HMX1 | Dipeptide ABC transporter permease                      |
| 37                                                                                  | 3        | Q9HR04 Q9HR04 | Iron-binding protein                                    |
| 40                                                                                  | 3        | Q9HMB7 Q9HMB7 | Probable carboxypeptidase                               |
| 78                                                                                  | 3        | Q9HS12 Q9HS12 | Phosphate ABC transporter permease                      |

| hit | peptides | accession     | description                                                      |
|-----|----------|---------------|------------------------------------------------------------------|
| 80  | 3        | Q9HMK0 Q9HMK0 | Putative uncharacterized protein                                 |
| 28  | 2        | Q9HQP2 Q9HQP2 | Transmembrane oligosaccharyl transferase                         |
| 38  | 2        | Q9HSM4 DHE42  | NADP-specific glutamate dehydrogenase B                          |
| 39  | 2        | Q9HMB6 Q9HMB6 | Alcohol dehydrogenase                                            |
| 42  | 2        | Q9HP76 Q9HP76 | Putative uncharacterized protein                                 |
| 45  | 2        | Q9HRL9 Q9HRL9 | NADH dehydrogenase/oxidoreductase                                |
| 47  | 2        | Q9HPB1 SECY   | Preprotein translocase subunit secY                              |
| 48  | 2        | Q9HM85 EF2    | Elongation factor 2                                              |
| 51  | 2        | Q9HMH4 Q9HMH4 | Putative uncharacterized protein                                 |
| 58  | 2        | Q9HMX0 Q9HMX0 | Dipeptide ABC transporter permease                               |
| 64  | 2        | Q9HP88 Q9HP88 | Phytoene dehydrogenase                                           |
| 66  | 2        | Q9HNY9 Q9HNY9 | Quinolinate phosphoribosyltransferase                            |
| 92  | 2        | Q9HSQ2 HTPX   | Probable protease htpX homolog                                   |
| 105 | 2        | Q9HMQ2 ASSY   | Argininosuccinate synthase                                       |
| 119 | 2        | Q9HP48 Q9HP48 | NADH oxidase                                                     |
| 141 | 2        | Q9HRR3 Q9HRR3 | Putative uncharacterized protein                                 |
| 160 | 2        | Q9HN22 Q9HN22 | Putative uncharacterized protein                                 |
| 266 | 2        | Q9HN92 Q9HN92 | Putative uncharacterized protein                                 |
| 618 | 2        | Q9HQV6 Q9HQV6 | Putative uncharacterized protein                                 |
| 50  | 1        | Q9HNN3 Q9HNN3 | Potassium channel homolog                                        |
| 54  | 1        | Q9HP84 HTR4   | Halobacterial transducer protein 4                               |
| 57  | 1        | Q9HSC3 LONH   | Putative protease La homolog type                                |
| 61  | 1        | Q9HQ23 Q9HQ23 | Putative uncharacterized protein                                 |
| 62  | 1        | Q9HNN6 Q9HNN6 | Putative uncharacterized protein                                 |
| 63  | 1        | Q9HT00 GLMS   | Glucosamine--fructose-6-phosphate aminotransferase [isomerizing] |
| 74  | 1        | Q9HPA6 Q9HPA6 | Htr-like protein                                                 |
| 75  | 1        | Q9HNR0 Q9HNR0 | Protein-export membrane protein                                  |
| 77  | 1        | Q9HNS6 Q9HNS6 | Putative uncharacterized protein                                 |
| 81  | 1        | Q9HQQ9 Q9HQQ9 | UDP-glucose dehydrogenase                                        |
| 85  | 1        | Q9HRL2 Q9HRL2 | F420H2:quinone oxidoreductase chain M                            |
| 91  | 1        | Q9HR92 HTR6   | Halobacterial transducer protein 6                               |
| 94  | 1        | Q9HS26 Q9HS26 | Na <sup>+</sup> /H <sup>+</sup> antiporter                       |
| 95  | 1        | P57684 ATKA   | Potassium-transporting ATPase A chain                            |
| 96  | 1        | Q9HMB4 Q9HMB4 | Repair helicase                                                  |
| 97  | 1        | Q9HR32 TOP6A  | Type II DNA topoisomerase VI subunit A                           |
| 100 | 1        | Q9HPQ2 Q9HPQ2 | Daunorubicin resistance ABC transporter ATP-binding protein      |
| 104 | 1        | Q9HR98 Q9HR98 | Cystathionine gamma-synthase                                     |
| 109 | 1        | Q9HMQ8 Q9HMQ8 | D-lactate dehydrogenase                                          |
| 110 | 1        | Q9HS00 Q9HS00 | Putative uncharacterized protein                                 |
| 112 | 1        | Q9HHI3 Q9HHI3 | Vng6381h                                                         |

| hit | peptides | accession     | description                                         |
|-----|----------|---------------|-----------------------------------------------------|
| 115 | 1        | Q9HQU8 Q9HQU8 | Acetyl-CoA synthetase                               |
| 117 | 1        | Q9HT01 Q9HT01 | Putative uncharacterized protein                    |
| 122 | 1        | Q9HPG8 Q9HPG8 | Ribonucleoside-diphosphate reductase                |
| 126 | 1        | P25964 BACS1  | Sensory rhodopsin-1                                 |
| 128 | 1        | Q9HN02 Q9HN02 | Hemolysin protein                                   |
| 131 | 1        | Q9HHP2 Q9HHP2 | Vng6298c                                            |
| 139 | 1        | Q9HMZ3 Q9HMZ3 | Heterodisulfide reductase                           |
| 144 | 1        | Q9HN43 CAPPA  | Phosphoenolpyruvate carboxylase                     |
| 146 | 1        | Q9HRJ5 Q9HRJ5 | Putative uncharacterized protein                    |
| 148 | 1        | Q9HNI3 Q9HNI3 | Putative uncharacterized protein                    |
| 149 | 1        | Q9HS86 Q9HS86 | Htr14 transducer                                    |
| 166 | 1        | Q9HNP7 Q9HNP7 | Putative uncharacterized protein                    |
| 173 | 1        | Q9HRT0 Q9HRT0 | Putative uncharacterized protein                    |
| 174 | 1        | Q9HP01 Q9HP01 | Spermidine/putrescine ABC transporter permease      |
| 175 | 1        | Q9HQ43 Q9HQ43 | Putative uncharacterized protein                    |
| 176 | 1        | Q9HPT9 Q9HPT9 | Carboxylesterase                                    |
| 184 | 1        | Q48294 Q48294 | Arginine deiminase                                  |
| 187 | 1        | Q9HR74 Q9HR74 | Dimethylsulfoxide reductase                         |
| 195 | 1        | Q9HQU4 Q9HQU4 | Inosine monophosphate dehydrogenase                 |
| 200 | 1        | Q9HR22 Q9HR22 | Ribose ABC transporter permease                     |
| 207 | 1        | Q9HP66 Q9HP66 | Putative uncharacterized protein                    |
| 211 | 1        | Q9HRZ2 Q9HRZ2 | Probable oxidoreductase                             |
| 217 | 1        | Q9HNS4 Q9HNS4 | Glycerol-3-phosphate dehydrogenase chain A          |
| 222 | 1        | Q9HSW2 Q9HSW2 | Putative uncharacterized protein                    |
| 239 | 1        | Q9HPY6 Q9HPY6 | Putative uncharacterized protein                    |
| 246 | 1        | Q9HQN2 Q9HQN2 | Isochorismate synthase                              |
| 255 | 1        | Q9HRS9 Q9HRS9 | Putative uncharacterized protein                    |
| 258 | 1        | Q9HMU8 Q9HMU8 | Copper transport ATP-binding protein                |
| 264 | 1        | Q9HN37 Q9HN37 | Protein export                                      |
| 282 | 1        | Q9HR54 Q9HR54 | Putative uncharacterized protein                    |
| 290 | 1        | Q9HSZ8 Q9HSZ8 | Glucose-1-phosphate thymidyltransferase             |
| 301 | 1        | Q9HNU9 COFG   | FO synthase subunit 1                               |
| 317 | 1        | Q9HQU3 Q9HQU3 | Putative uncharacterized protein                    |
| 318 | 1        | Q9HMU6 Q9HMU6 | Putative uncharacterized protein                    |
| 320 | 1        | Q9HNW7 Q9HNW7 | Phosphoribosyl transferase                          |
| 323 | 1        | Q9HQ64 Q9HQ64 | Membrane anchor                                     |
| 325 | 1        | Q9HN54 Q9HN54 | Putative uncharacterized protein                    |
| 339 | 1        | Q9HMJ2 Q9HMJ2 | Putative uncharacterized protein                    |
| 362 | 1        | Q9HST4 MOAA   | Probable molybdenum cofactor biosynthesis protein A |
| 374 | 1        | Q9HPI6 Q9HPI6 | Putative uncharacterized protein                    |

| hit  | peptides | accession     | description                                          |
|------|----------|---------------|------------------------------------------------------|
| 391  | 1        | P57697 PSMA   | Proteasome subunit alpha                             |
| 402  | 1        | Q9HNQ9 Q9HNQ9 | Protein-export membrane protein                      |
| 412  | 1        | Q9HQ52 THYX   | Thymidylate synthase thyX                            |
| 449  | 1        | Q9HPW3 Q9HPW3 | Putative uncharacterized protein                     |
| 453  | 1        | Q9HSW6 CDC61  | Cell division control protein 6 homolog 1            |
| 462  | 1        | Q9HN08 Q9HN08 | Thioredoxin reductase                                |
| 474  | 1        | Q9HRL4 Q9HRL4 | NADH dehydrogenase/oxidoreductase-like protein       |
| 476  | 1        | Q9HM88 Q9HM88 | Homoserine dehydrogenase                             |
| 479  | 1        | Q9HRS4 Q9HRS4 | Putative uncharacterized protein                     |
| 493  | 1        | Q9HN36 Q9HN36 | Protein export                                       |
| 519  | 1        | Q9HNC8 Q9HNC8 | Putative uncharacterized protein                     |
| 542  | 1        | Q9HMC9 Q9HMC9 | Arsenite transport protein                           |
| 558  | 1        | Q9HQU7 Q9HQU7 | Probable oxidoreductase                              |
| 559  | 1        | Q9HRK1 Q9HRK1 | Cytochrome c oxidase subunit III                     |
| 560  | 1        | Q9HRS8 Q9HRS8 | NADH dehydrogenase/oxidoreductase                    |
| 564  | 1        | Q9HPK2 Y1595  | UPF0100 protein VNG1595C                             |
| 585  | 1        | Q9HQ34 Q9HQ34 | Putative uncharacterized protein                     |
| 599  | 1        | Q9HQ13 Q9HQ13 | Geranylgeranyl diphosphate synthase                  |
| 603  | 1        | Q9HPQ1 Q9HPQ1 | Sodium-and chloride-dependent transporter            |
| 615  | 1        | Q9HSF1 Q9HSF1 | Putative uncharacterized protein                     |
| 650  | 1        | Q9HNE5 Q9HNE5 | Geranylgeranyl-diphosphate geranylgeranyltransferase |
| 684  | 1        | O52037 O52037 | Putative uncharacterized protein                     |
| 704  | 1        | O51975 O51975 | Putative uncharacterized protein                     |
| 717  | 1        | Q9HML4 Q9HML4 | Putative uncharacterized protein                     |
| 732  | 1        | Q9HSA0 Q9HSA0 | Putative uncharacterized protein                     |
| 791  | 1        | Q9HNB8 Q9HNB8 | Putative uncharacterized protein                     |
| 808  | 1        | Q9HS40 Q9HS40 | Putative uncharacterized protein                     |
| 830  | 1        | Q9HQE2 Q9HQE2 | Putative uncharacterized protein                     |
| 861  | 1        | Q9HP98 Q9HP98 | Htr-like protein                                     |
| 864  | 1        | Q9HPF2 RADB   | DNA repair and recombination protein radB            |
| 880  | 1        | Q9HRW7 Q9HRW7 | Putative uncharacterized protein                     |
| 894  | 1        | Q9HRN0 Q9HRN0 | Putative uncharacterized protein                     |
| 899  | 1        | Q9HME2 Q9HME2 | Putative uncharacterized protein                     |
| 928  | 1        | Q9HMK6 Q9HMK6 | Putative uncharacterized protein                     |
| 939  | 1        | Q9HNI4 Q9HNI4 | Putative uncharacterized protein                     |
| 1035 | 1        | Q9HSP8 Q9HSP8 | Archaeal histone A1                                  |
| 1041 | 1        | Q9HR01 Q9HR01 | Putative uncharacterized protein                     |
| 1095 | 1        | Q9HRH6 Q9HRH6 | Putative uncharacterized protein                     |
| 1125 | 1        | Q9HQ91 Q9HQ91 | Putative uncharacterized protein                     |
| 1161 | 1        | Q9HMB0 Q9HMB0 | Putative uncharacterized protein                     |

| hit  | peptides | accession     | description                      |
|------|----------|---------------|----------------------------------|
| 1189 | 1        | Q9HRR5 Q9HRR5 | Putative uncharacterized protein |
| 1204 | 1        | Q9HSJ4 Q9HSJ4 | Putative uncharacterized protein |
| 1247 | 1        | Q9HRR2 Q9HRR2 | Cytochrome b6                    |
| 1287 | 1        | Q9HNI2 GLNA   | Glutamine synthetase             |
| 1414 | 1        | Q9HQB1 Q9HQB1 | Putative uncharacterized protein |
| 1581 | 1        | Q9HRK3 Q9HRK3 | Putative uncharacterized protein |
| 1657 | 1        | Q9HP64 Q9HP64 | Putative uncharacterized protein |
| 1659 | 1        | Q9HNA9 Q9HNA9 | Putative uncharacterized protein |

END OF LIST IV



| hit                                                                                    | peptides | accession     | description                                             |
|----------------------------------------------------------------------------------------|----------|---------------|---------------------------------------------------------|
| <b>V. Purple membrane; elastase digest; nLC-MALDI MS/MS; AVLSTG search specificity</b> |          |               |                                                         |
| 1                                                                                      | 86       | P02945 BACR   | Bacteriorhodopsin                                       |
| 2                                                                                      | 48       | P00772 ELA1   | Elastase-1 precursor - Sus scrofa                       |
| 3                                                                                      | 30       | Q9HMW9 Q9HMW  | Dipeptide ABC transporter dipeptide-binding             |
| 6                                                                                      | 19       | Q48302 Q48302 | Precursor proteolipid                                   |
| 4                                                                                      | 13       | Q9HR99 Q9HR99 | Halocyanin-like                                         |
| 5                                                                                      | 13       | Q9HMI3 Q9HMI3 | Dipeptide ABC transporter ATP-binding                   |
| 7                                                                                      | 11       | Q9HRQ9 Q9HRQ9 | Putative uncharacterized protein                        |
| 8                                                                                      | 11       | Q9HN93 Q9HN93 | Halocyanin-like                                         |
| 9                                                                                      | 10       | Q9HHN1 Q9HHN1 | Na <sup>+</sup> /H <sup>+</sup> antiporter              |
| 10                                                                                     | 10       | Q9HRS0 Q9HRS0 | Putative uncharacterized protein                        |
| 11                                                                                     | 8        | Q9HN95 Q9HN95 | Cytochrome c oxidase subunit I                          |
| 12                                                                                     | 7        | Q9HSA8 Q9HSA8 | Bifunctional short chain isoprenyl diphosphate synthase |
| 13                                                                                     | 6        | Q9HM69 CSG    | Cell surface glycoprotein                               |
| 14                                                                                     | 6        | Q9HRL3 Q9HRL3 | F420H2:quinone oxidoreductase chain L                   |
| 15                                                                                     | 6        | Q9HND8 VATI   | V-type ATP synthase subunit I                           |
| 16                                                                                     | 5        | Q9HRL1 Q9HRL1 | NADH dehydrogenase/oxidoreductase                       |
| 17                                                                                     | 5        | Q9HMF1 Q9HMF1 | Aconitase                                               |
| 18                                                                                     | 4        | Q9HRR0 Q9HRR0 | Putative uncharacterized protein                        |
| 19                                                                                     | 4        | Q9HMW4 Q9HMW  | Oligopeptide binding protein                            |
| 21                                                                                     | 4        | Q9HMG3 Q9HMG3 | Putative uncharacterized protein                        |
| 24                                                                                     | 4        | Q9HSS1 Q9HSS1 | Phosphoglycerate dehydrogenase                          |
| 25                                                                                     | 4        | Q9HQP2 Q9HQP2 | Transmembrane oligosaccharyl transferase                |
| 20                                                                                     | 3        | Q9HMT7 Q9HMT7 | Probable thiosulfate sulfurtransferase                  |
| 22                                                                                     | 3        | Q9HNL7 Q9HNL7 | Putative uncharacterized protein                        |
| 23                                                                                     | 3        | Q9HHP3 Q9HHP3 | Vng6297c                                                |
| 26                                                                                     | 3        | Q9HQF4 Q9HQF4 | Membrane protein                                        |
| 27                                                                                     | 3        | Q9HRL8 Q9HRL8 | NADH dehydrogenase/oxidoreductase                       |
| 28                                                                                     | 3        | Q9HMX1 Q9HMX1 | Dipeptide ABC transporter permease                      |
| 29                                                                                     | 3        | Q9HS12 Q9HS12 | Phosphate ABC transporter permease                      |
| 68                                                                                     | 3        | Q9HN92 Q9HN92 | Putative uncharacterized protein                        |
| 30                                                                                     | 2        | Q9HMX0 Q9HMX0 | Dipeptide ABC transporter permease                      |
| 31                                                                                     | 2        | Q9HR04 Q9HR04 | Iron-binding protein                                    |
| 32                                                                                     | 2        | Q9HP48 Q9HP48 | NADH oxidase                                            |
| 33                                                                                     | 2        | Q9HMH4 Q9HMH4 | Putative uncharacterized protein                        |
| 34                                                                                     | 2        | Q9HRR1 Q9HRR1 | Putative uncharacterized protein                        |
| 35                                                                                     | 2        | Q9HNY2 Q9HNY2 | Putative uncharacterized protein                        |
| 37                                                                                     | 2        | Q9HM85 EF2    | Elongation factor 2                                     |

| hit | peptides | accession     | description                                                      |
|-----|----------|---------------|------------------------------------------------------------------|
| 38  | 2        | Q9HM89 EF1A   | Elongation factor 1-alpha                                        |
| 39  | 2        | Q9HNS6 Q9HNS6 | Putative uncharacterized protein                                 |
| 45  | 2        | Q9HP88 Q9HP88 | Phytoene dehydrogenase                                           |
| 58  | 2        | Q9HR32 TOP6A  | Type II DNA topoisomerase VI subunit A                           |
| 72  | 2        | P16102 BACH   | Halorhodopsin                                                    |
| 74  | 2        | Q9HHI2 Q9HHI2 | L-lactate permease                                               |
| 99  | 2        | Q9HQ23 Q9HQ23 | Putative uncharacterized protein                                 |
| 103 | 2        | Q9HN43 CAPPA  | Phosphoenolpyruvate carboxylase                                  |
| 118 | 2        | Q9HMU9 Q9HMU9 | Nitrite/nitrate reduction protein                                |
| 126 | 2        | Q9HS00 Q9HS00 | Putative uncharacterized protein                                 |
| 289 | 2        | O51975 O51975 | Putative uncharacterized protein                                 |
| 36  | 1        | Q9HPG8 Q9HPG8 | Ribonucleoside-diphosphate reductase                             |
| 40  | 1        | Q9HP84 HTR4   | Halobacterial transducer protein 4                               |
| 41  | 1        | Q9HMS7 Q9HMS7 | DNA damage-inducible protein                                     |
| 43  | 1        | Q9HT00 GLMS   | Glucosamine--fructose-6-phosphate aminotransferase [isomerizing] |
| 47  | 1        | Q9HRL2 Q9HRL2 | F420H2:quinone oxidoreductase chain M                            |
| 48  | 1        | Q9HMB4 Q9HMB4 | Repair helicase                                                  |
| 49  | 1        | Q9HNN6 Q9HNN6 | Putative uncharacterized protein                                 |
| 50  | 1        | Q9HPB1 SECY   | Preprotein translocase subunit secY                              |
| 52  | 1        | Q9HPQ2 Q9HPQ2 | Daunorubicin resistance ABC transporter ATP-binding protein      |
| 54  | 1        | Q9HS26 Q9HS26 | Na <sup>+</sup> /H <sup>+</sup> antiporter                       |
| 56  | 1        | Q9HMU6 Q9HMU6 | Putative uncharacterized protein                                 |
| 57  | 1        | Q9HRJ5 Q9HRJ5 | Putative uncharacterized protein                                 |
| 59  | 1        | Q9HQQ9 Q9HQQ9 | UDP-glucose dehydrogenase                                        |
| 60  | 1        | Q9HSM2 MUTS1  | DNA mismatch repair protein mutS 1                               |
| 61  | 1        | Q9HMU8 Q9HMU8 | Copper transport ATP-binding protein                             |
| 62  | 1        | Q9HMZ3 Q9HMZ3 | Heterodisulfide reductase                                        |
| 63  | 1        | Q9HSM4 DHE42  | NADP-specific glutamate dehydrogenase B                          |
| 66  | 1        | Q9HHR4 Q9HHR4 | Vng6268c                                                         |
| 69  | 1        | Q9HNW7 Q9HNW7 | Phosphoribosyl transferase                                       |
| 70  | 1        | Q9HSJ6 Q9HSJ6 | Putative uncharacterized protein                                 |
| 76  | 1        | Q9HRS4 Q9HRS4 | Putative uncharacterized protein                                 |
| 77  | 1        | Q9HRS9 Q9HRS9 | Putative uncharacterized protein                                 |
| 80  | 1        | Q9HS72 SECE   | Preprotein translocase subunit secE                              |
| 81  | 1        | Q9HNR0 Q9HNR0 | Protein-export membrane protein                                  |
| 84  | 1        | Q9HQ64 Q9HQ64 | Membrane anchor                                                  |
| 85  | 1        | Q9HS86 Q9HS86 | Htr14 transducer                                                 |
| 87  | 1        | Q9HPA9 Q9HPA9 | TRK potassium uptake system protein                              |
| 93  | 1        | Q9HNQ9 Q9HNQ9 | Protein-export membrane protein                                  |
| 96  | 1        | Q9HNK1 Q9HNK1 | Putative uncharacterized protein                                 |

| hit | peptides | accession     | description                                      |
|-----|----------|---------------|--------------------------------------------------|
| 97  | 1        | Q9HN02 Q9HN02 | Hemolysin protein                                |
| 100 | 1        | Q9HSA0 Q9HSA0 | Putative uncharacterized protein                 |
| 105 | 1        | Q9HHI3 Q9HHI3 | Vng6381h                                         |
| 110 | 1        | Q9HQE2 Q9HQE2 | Putative uncharacterized protein                 |
| 116 | 1        | O54610 O54610 | CydA                                             |
| 119 | 1        | Q9HPT9 Q9HPT9 | Carboxylesterase                                 |
| 123 | 1        | Q9HPG5 TRPE1  | Anthranilate synthase component 1 1              |
| 127 | 1        | Q9HRU7 Q9HRU7 | Putative uncharacterized protein                 |
| 128 | 1        | Q9HN22 Q9HN22 | Putative uncharacterized protein                 |
| 132 | 1        | Q9HN79 Q9HN79 | DNA damage-inducible protein                     |
| 140 | 1        | Q9HMV1 Q9HMV1 | Aspartokinase                                    |
| 142 | 1        | Q9HPM1 Q9HPM1 | Precorrin isomerase                              |
| 145 | 1        | Q9HMB7 Q9HMB7 | Probable carboxypeptidase                        |
| 150 | 1        | Q9HPY6 Q9HPY6 | Putative uncharacterized protein                 |
| 151 | 1        | Q9HMY7 Q9HMY7 | Putative uncharacterized protein                 |
| 152 | 1        | Q9HRL4 Q9HRL4 | NADH dehydrogenase/oxidoreductase-like protein   |
| 155 | 1        | Q9HQU8 Q9HQU8 | Acetyl-CoA synthetase                            |
| 156 | 1        | Q9HSW2 Q9HSW2 | Putative uncharacterized protein                 |
| 158 | 1        | Q9HR62 Q9HR62 | Putative uncharacterized protein                 |
| 161 | 1        | Q9HMQ8 Q9HMQ8 | D-lactate dehydrogenase                          |
| 162 | 1        | Q9HRA8 Q9HRA8 | Putative uncharacterized protein                 |
| 164 | 1        | Q9HP98 Q9HP98 | Htr-like protein                                 |
| 165 | 1        | Q9HRJ0 Q9HRJ0 | Putative uncharacterized protein                 |
| 175 | 1        | P25964 BACS1  | Sensory rhodopsin-1                              |
| 177 | 1        | Q9HP66 Q9HP66 | Putative uncharacterized protein                 |
| 182 | 1        | P33518 COX1   | Cytochrome c oxidase polypeptide 1               |
| 183 | 1        | Q9HR22 Q9HR22 | Ribose ABC transporter permease                  |
| 185 | 1        | Q9HN36 Q9HN36 | Protein export                                   |
| 186 | 1        | Q9HPK2 Y1595  | UPF0100 protein VNG1595C                         |
| 188 | 1        | Q9HS30 Q9HS30 | Putative uncharacterized protein                 |
| 189 | 1        | Q9HNY9 Q9HNY9 | Quinolate phosphoribosyltransferase              |
| 205 | 1        | Q9HN37 Q9HN37 | Protein export                                   |
| 221 | 1        | Q9HSQ7 Q9HSQ7 | ABC transport protein                            |
| 234 | 1        | Q9HP76 Q9HP76 | Putative uncharacterized protein                 |
| 236 | 1        | Q9HPQ6 Q9HPQ6 | A/G specific adenine glycosylase, repair protein |
| 239 | 1        | Q9HMQ2 ASSY   | Argininosuccinate synthase                       |
| 248 | 1        | Q9HSJ4 Q9HSJ4 | Putative uncharacterized protein                 |
| 258 | 1        | Q9HQE1 Q9HQE1 | Glutamate dehydrogenase                          |
| 260 | 1        | Q9HPQ1 Q9HPQ1 | Sodium-and chloride-dependent transporter        |
| 266 | 1        | Q9HQU3 Q9HQU3 | Putative uncharacterized protein                 |

| hit | peptides | accession     | description                                                 |
|-----|----------|---------------|-------------------------------------------------------------|
| 270 | 1        | Q9HMC9 Q9HMC9 | Arsenite transport protein                                  |
| 288 | 1        | Q9HST9 Q9HST9 | Putative uncharacterized protein                            |
| 294 | 1        | Q9HNI3 Q9HNI3 | Putative uncharacterized protein                            |
| 299 | 1        | Q9HQ90 Q9HQ90 | Putative uncharacterized protein                            |
| 303 | 1        | Q9HQ63 DHSD   | Succinate dehydrogenase hydrophobic membrane anchor subunit |
| 309 | 1        | Q9HMC7 THI4   | Putative thiazole biosynthetic enzyme                       |
| 325 | 1        | Q9HQZ3 Q9HQZ3 | Putative uncharacterized protein                            |
| 343 | 1        | Q9HMB0 Q9HMB0 | Putative uncharacterized protein                            |
| 345 | 1        | Q48325 TBPB   | TATA-box-binding protein B                                  |
| 348 | 1        | Q9HRW7 Q9HRW7 | Putative uncharacterized protein                            |
| 361 | 1        | Q9HSW6 CDC61  | Cell division control protein 6 homolog 1                   |
| 363 | 1        | Q9HMJ2 Q9HMJ2 | Putative uncharacterized protein                            |
| 371 | 1        | Q9HQH2 Q9HQH2 | Putative uncharacterized protein                            |
| 392 | 1        | Q9HNB8 Q9HNB8 | Putative uncharacterized protein                            |
| 395 | 1        | Q9HRR3 Q9HRR3 | Putative uncharacterized protein                            |
| 398 | 1        | Q9HRR2 Q9HRR2 | Cytochrome b6                                               |
| 408 | 1        | Q9HNJ2 Q9HNJ2 | Putative uncharacterized protein                            |
| 411 | 1        | Q9HM88 Q9HM88 | Homoserine dehydrogenase                                    |
| 433 | 1        | Q9HME2 Q9HME2 | Putative uncharacterized protein                            |
| 460 | 1        | Q9HMY1 Q9HMY1 | Sensor protein                                              |
| 488 | 1        | Q9HN08 Q9HN08 | Thioredoxin reductase                                       |
| 493 | 1        | Q9HRH6 Q9HRH6 | Putative uncharacterized protein                            |
| 495 | 1        | Q9HRR5 Q9HRR5 | Putative uncharacterized protein                            |
| 499 | 1        | Q9HS52 SYP    | Prolyl-tRNA synthetase                                      |
| 512 | 1        | Q9HRK3 Q9HRK3 | Putative uncharacterized protein                            |
| 520 | 1        | Q9HSE5 Q9HSE5 | Putative uncharacterized protein                            |
| 525 | 1        | Q9HQV6 Q9HQV6 | Putative uncharacterized protein                            |
| 537 | 1        | Q9HMK6 Q9HMK6 | Putative uncharacterized protein                            |
| 545 | 1        | Q9HR54 Q9HR54 | Putative uncharacterized protein                            |
| 558 | 1        | Q9HQW3 Q9HQW3 | Putative uncharacterized protein                            |
| 587 | 1        | Q9HPI6 Q9HPI6 | Putative uncharacterized protein                            |
| 632 | 1        | Q9HRR7 Q9HRR7 | Putative uncharacterized protein                            |
| 633 | 1        | Q9HQB1 Q9HQB1 | Putative uncharacterized protein                            |
| 651 | 1        | Q9HRR6 Q9HRR6 | Putative uncharacterized protein                            |
| 668 | 1        | Q9HN96 Q9HN96 | Putative uncharacterized protein                            |
| 689 | 1        | Q9HRP9 Q9HRP9 | Putative uncharacterized protein                            |
| 721 | 1        | Q9HRE8 RTCA   | Probable RNA 3'-terminal phosphate cyclase                  |
| 737 | 1        | Q9HRP5 Q9HRP5 | Putative uncharacterized protein                            |
| 743 | 1        | Q9HPV1 Q9HPV1 | Putative uncharacterized protein                            |
| 755 | 1        | Q9HS03 Q9HS03 | Putative uncharacterized protein                            |

| hit  | peptides | accession     | description                                       |
|------|----------|---------------|---------------------------------------------------|
| 981  | 1        | Q9HHQ7 Q9HHQ7 | Sn-glycerol-3-phosphate transport system permease |
| 1081 | 1        | Q9HNX9 Q9HNX9 | Putative uncharacterized protein                  |
| 1082 | 1        | Q9HRF3 Q9HRF3 | Putative uncharacterized protein                  |

END OF LIST III

| hit                                                                                     | peptides | accession     | description                                             |
|-----------------------------------------------------------------------------------------|----------|---------------|---------------------------------------------------------|
| <b>VI. Purple membrane; elastase digest; nLC-MALDI MS/MS; AVLIST search specificity</b> |          |               |                                                         |
| 1                                                                                       | 86       | P02945 BACR   | Bacteriorhodopsin                                       |
| 2                                                                                       | 48       | P00772 ELA1   | Elastase-1 precursor - Sus scrofa                       |
| 3                                                                                       | 29       | Q9HMW9 Q9HMW  | Dipeptide ABC transporter dipeptide-binding             |
| 6                                                                                       | 22       | Q48302 Q48302 | Precursor proteolipid                                   |
| 4                                                                                       | 18       | Q9HR99 Q9HR99 | Halocyanin-like                                         |
| 5                                                                                       | 17       | Q9HMI3 Q9HMI3 | Dipeptide ABC transporter ATP-binding                   |
| 7                                                                                       | 12       | Q9HN93 Q9HN93 | Halocyanin-like                                         |
| 8                                                                                       | 12       | Q9HRQ9 Q9HRQ9 | Putative uncharacterized protein                        |
| 10                                                                                      | 9        | Q9HHN1 Q9HHN1 | Na <sup>+</sup> /H <sup>+</sup> antiporter              |
| 11                                                                                      | 9        | Q9HMG3 Q9HMG3 | Putative uncharacterized protein                        |
| 12                                                                                      | 9        | Q9HRS0 Q9HRS0 | Putative uncharacterized protein                        |
| 13                                                                                      | 8        | Q9HRL3 Q9HRL3 | F420H2:quinone oxidoreductase chain L                   |
| 14                                                                                      | 8        | Q9HN95 Q9HN95 | Cytochrome c oxidase subunit I                          |
| 15                                                                                      | 6        | Q9HND8 VATI   | V-type ATP synthase subunit I                           |
| 16                                                                                      | 5        | Q9HRL1 Q9HRL1 | NADH dehydrogenase/oxidoreductase                       |
| 17                                                                                      | 5        | Q9HM69 CSG    | Cell surface glycoprotein                               |
| 18                                                                                      | 5        | Q9HMF1 Q9HMF1 | Aconitase                                               |
| 20                                                                                      | 5        | Q9HSS1 Q9HSS1 | Phosphoglycerate dehydrogenase                          |
| 25                                                                                      | 5        | Q9HR04 Q9HR04 | Iron-binding protein                                    |
| 19                                                                                      | 4        | Q9HSA8 Q9HSA8 | Bifunctional short chain isoprenyl diphosphate synthase |
| 23                                                                                      | 4        | Q9HMW4 Q9HMW  | Oligopeptide binding protein                            |
| 28                                                                                      | 4        | Q9HQP2 Q9HQP2 | Transmembrane oligosaccharyl transferase                |
| 21                                                                                      | 3        | Q9HMT7 Q9HMT7 | Probable thiosulfate sulfurtransferase                  |
| 22                                                                                      | 3        | Q9HMX1 Q9HMX1 | Dipeptide ABC transporter permease                      |
| 24                                                                                      | 3        | Q9HHP3 Q9HHP3 | Vng6297c                                                |
| 26                                                                                      | 3        | Q9HM89 EF1A   | Elongation factor 1-alpha                               |
| 27                                                                                      | 3        | Q9HQF4 Q9HQF4 | Membrane protein                                        |
| 30                                                                                      | 3        | Q9HS12 Q9HS12 | Phosphate ABC transporter permease                      |
| 31                                                                                      | 3        | Q9HRR0 Q9HRR0 | Putative uncharacterized protein                        |
| 63                                                                                      | 3        | Q9HN92 Q9HN92 | Putative uncharacterized protein                        |
| 29                                                                                      | 2        | Q9HNL7 Q9HNL7 | Putative uncharacterized protein                        |
| 32                                                                                      | 2        | Q9HMX0 Q9HMX0 | Dipeptide ABC transporter permease                      |
| 33                                                                                      | 2        | Q9HRR1 Q9HRR1 | Putative uncharacterized protein                        |
| 34                                                                                      | 2        | Q9HM85 EF2    | Elongation factor 2                                     |
| 35                                                                                      | 2        | Q9HP48 Q9HP48 | NADH oxidase                                            |
| 37                                                                                      | 2        | Q9HNS6 Q9HNS6 | Putative uncharacterized protein                        |
| 39                                                                                      | 2        | Q9HP88 Q9HP88 | Phytoene dehydrogenase                                  |

| hit | peptides | accession     | description                                                 |
|-----|----------|---------------|-------------------------------------------------------------|
| 45  | 2        | Q9HRL8 Q9HRL8 | NADH dehydrogenase/oxidoreductase                           |
| 46  | 2        | Q9HNY2 Q9HNY2 | Putative uncharacterized protein                            |
| 57  | 2        | Q9HR32 TOP6A  | Type II DNA topoisomerase VI subunit A                      |
| 69  | 2        | Q9HNK1 Q9HNK1 | Putative uncharacterized protein                            |
| 78  | 2        | P16102 BACH   | Halorhodopsin                                               |
| 83  | 2        | Q9HHI2 Q9HHI2 | L-lactate permease                                          |
| 90  | 2        | Q9HN43 CAPPA  | Phosphoenolpyruvate carboxylase                             |
| 138 | 2        | Q9HP66 Q9HP66 | Putative uncharacterized protein                            |
| 162 | 2        | Q9HS00 Q9HS00 | Putative uncharacterized protein                            |
| 258 | 2        | O51975 O51975 | Putative uncharacterized protein                            |
| 36  | 1        | Q9HHR4 Q9HHR4 | Vng6268c                                                    |
| 38  | 1        | Q9HPG8 Q9HPG8 | Ribonucleoside-diphosphate reductase                        |
| 41  | 1        | Q9HRU7 Q9HRU7 | Putative uncharacterized protein                            |
| 42  | 1        | Q9HRJ5 Q9HRJ5 | Putative uncharacterized protein                            |
| 43  | 1        | Q9HMS7 Q9HMS7 | DNA damage-inducible protein                                |
| 44  | 1        | Q9HP84 HTR4   | Halobacterial transducer protein 4                          |
| 49  | 1        | Q9HRL2 Q9HRL2 | F420H2:quinone oxidoreductase chain M                       |
| 50  | 1        | Q9HPB1 SECY   | Preprotein translocase subunit secY                         |
| 53  | 1        | Q9HS26 Q9HS26 | Na <sup>+</sup> /H <sup>+</sup> antiporter                  |
| 54  | 1        | Q9HRL9 Q9HRL9 | NADH dehydrogenase/oxidoreductase                           |
| 55  | 1        | Q9HPA9 Q9HPA9 | TRK potassium uptake system protein                         |
| 56  | 1        | Q9HQQ9 Q9HQQ9 | UDP-glucose dehydrogenase                                   |
| 58  | 1        | Q9HSM2 MUTS1  | DNA mismatch repair protein mutS 1                          |
| 60  | 1        | Q9HQ54 Q9HQ54 | Putative uncharacterized protein                            |
| 61  | 1        | Q9HMU8 Q9HMU8 | Copper transport ATP-binding protein                        |
| 66  | 1        | Q9HSM4 DHE42  | NADP-specific glutamate dehydrogenase B                     |
| 68  | 1        | Q9HPQ2 Q9HPQ2 | Daunorubicin resistance ABC transporter ATP-binding protein |
| 73  | 1        | Q9HRS4 Q9HRS4 | Putative uncharacterized protein                            |
| 74  | 1        | P25964 BACS1  | Sensory rhodopsin-1                                         |
| 76  | 1        | Q9HS86 Q9HS86 | Htr14 transducer                                            |
| 80  | 1        | Q9HS72 SECE   | Preprotein translocase subunit secE                         |
| 82  | 1        | Q9HR22 Q9HR22 | Ribose ABC transporter permease                             |
| 84  | 1        | Q9HQ64 Q9HQ64 | Membrane anchor                                             |
| 89  | 1        | Q9HSA0 Q9HSA0 | Putative uncharacterized protein                            |
| 91  | 1        | Q9HN02 Q9HN02 | Hemolysin protein                                           |
| 94  | 1        | Q9HNQ9 Q9HNQ9 | Protein-export membrane protein                             |
| 95  | 1        | Q9HMZ3 Q9HMZ3 | Heterodisulfide reductase                                   |
| 98  | 1        | Q9HHI3 Q9HHI3 | Vng6381h                                                    |
| 99  | 1        | Q9HPM1 Q9HPM1 | Precorrin isomerase                                         |
| 102 | 1        | Q9HR62 Q9HR62 | Putative uncharacterized protein                            |

| hit | peptides | accession     | description                                      |
|-----|----------|---------------|--------------------------------------------------|
| 104 | 1        | Q9HPG5 TRPE1  | Anthranilate synthase component 1 1              |
| 105 | 1        | Q9HN22 Q9HN22 | Putative uncharacterized protein                 |
| 115 | 1        | Q9HNY9 Q9HNY9 | Quinolinate phosphoribosyltransferase            |
| 118 | 1        | Q9HSL1 Q9HSL1 | Putative uncharacterized protein                 |
| 119 | 1        | Q9HP01 Q9HP01 | Spermidine/putrescine ABC transporter permease   |
| 122 | 1        | Q9HRS9 Q9HRS9 | Putative uncharacterized protein                 |
| 128 | 1        | Q9HMB7 Q9HMB7 | Probable carboxypeptidase                        |
| 131 | 1        | Q9HQE2 Q9HQE2 | Putative uncharacterized protein                 |
| 135 | 1        | Q9HMY7 Q9HMY7 | Putative uncharacterized protein                 |
| 136 | 1        | Q9HRL4 Q9HRL4 | NADH dehydrogenase/oxidoreductase-like protein   |
| 137 | 1        | Q9HSW2 Q9HSW2 | Putative uncharacterized protein                 |
| 139 | 1        | Q9HPT9 Q9HPT9 | Carboxylesterase                                 |
| 143 | 1        | Q9HMQ8 Q9HMQ8 | D-lactate dehydrogenase                          |
| 145 | 1        | Q9HRA8 Q9HRA8 | Putative uncharacterized protein                 |
| 148 | 1        | Q9HMH4 Q9HMH4 | Putative uncharacterized protein                 |
| 150 | 1        | Q9HN79 Q9HN79 | DNA damage-inducible protein                     |
| 155 | 1        | P33518 COX1   | Cytochrome c oxidase polypeptide 1               |
| 157 | 1        | Q9HN37 Q9HN37 | Protein export                                   |
| 160 | 1        | Q07971 Q07971 | RepH protein                                     |
| 169 | 1        | Q9HN36 Q9HN36 | Protein export                                   |
| 173 | 1        | Q9HMB4 Q9HMB4 | Repair helicase                                  |
| 174 | 1        | Q9HS30 Q9HS30 | Putative uncharacterized protein                 |
| 178 | 1        | Q9HMU6 Q9HMU6 | Putative uncharacterized protein                 |
| 179 | 1        | O54610 O54610 | CydA                                             |
| 187 | 1        | Q9HRJ8 Q9HRJ8 | Heme synthase                                    |
| 190 | 1        | Q9HMV1 Q9HMV1 | Aspartokinase                                    |
| 192 | 1        | Q9HHV2 Q9HHV2 | Iron transport protein A                         |
| 193 | 1        | Q9HMC9 Q9HMC9 | Arsenite transport protein                       |
| 204 | 1        | Q9HP76 Q9HP76 | Putative uncharacterized protein                 |
| 206 | 1        | Q9HPQ6 Q9HPQ6 | A/G specific adenine glycosylase, repair protein |
| 211 | 1        | Q9HPY6 Q9HPY6 | Putative uncharacterized protein                 |
| 213 | 1        | Q9HQB8 Q9HQB8 | Putative uncharacterized protein                 |
| 220 | 1        | Q9HMJ2 Q9HMJ2 | Putative uncharacterized protein                 |
| 228 | 1        | Q9HNJ2 Q9HNJ2 | Putative uncharacterized protein                 |
| 229 | 1        | Q9HMU9 Q9HMU9 | Nitrite/nitrate reduction protein                |
| 232 | 1        | Q9HPQ1 Q9HPQ1 | Sodium-and chloride-dependent transporter        |
| 233 | 1        | Q9HPQ5 Q9HPQ5 | Htr8 transducer                                  |
| 237 | 1        | Q9HM88 Q9HM88 | Homoserine dehydrogenase                         |
| 239 | 1        | Q9HQU3 Q9HQU3 | Putative uncharacterized protein                 |
| 255 | 1        | Q9HRJ0 Q9HRJ0 | Putative uncharacterized protein                 |



| hit | peptides | accession     | description                                                 |
|-----|----------|---------------|-------------------------------------------------------------|
| 260 | 1        | Q9HME2 Q9HME2 | Putative uncharacterized protein                            |
| 264 | 1        | Q9HQU8 Q9HQU8 | Acetyl-CoA synthetase                                       |
| 265 | 1        | Q9HQE1 Q9HQE1 | Glutamate dehydrogenase                                     |
| 273 | 1        | Q9HQ63 DHSD   | Succinate dehydrogenase hydrophobic membrane anchor subunit |
| 277 | 1        | Q9HNE6 Q9HNE6 | Brp-like homolog                                            |
| 278 | 1        | Q9HQ90 Q9HQ90 | Putative uncharacterized protein                            |
| 279 | 1        | Q9HMQ2 ASSY   | Argininosuccinate synthase                                  |
| 304 | 1        | Q9HMB0 Q9HMB0 | Putative uncharacterized protein                            |
| 307 | 1        | Q48325 TBPB   | TATA-box-binding protein B                                  |
| 310 | 1        | Q9HRW7 Q9HRW7 | Putative uncharacterized protein                            |
| 319 | 1        | Q9HRR2 Q9HRR2 | Cytochrome b6                                               |
| 323 | 1        | Q9HSW6 CDC61  | Cell division control protein 6 homolog 1                   |
| 324 | 1        | Q9HML8 PSTB2  | Phosphate import ATP-binding protein pstB 2                 |
| 328 | 1        | Q9HQH2 Q9HQH2 | Putative uncharacterized protein                            |
| 331 | 1        | Q9HRJ7 Q9HRJ7 | ABC transporter, ATP-binding protein homolog                |
| 344 | 1        | Q9HQV2 Q9HQV2 | Putative uncharacterized protein                            |
| 354 | 1        | Q9HNB8 Q9HNB8 | Putative uncharacterized protein                            |
| 387 | 1        | Q9HSQ7 Q9HSQ7 | ABC transport protein                                       |
| 401 | 1        | Q9HQ23 Q9HQ23 | Putative uncharacterized protein                            |
| 432 | 1        | Q9HRH6 Q9HRH6 | Putative uncharacterized protein                            |
| 433 | 1        | Q9HSE5 Q9HSE5 | Putative uncharacterized protein                            |
| 441 | 1        | Q9HS52 SYP    | Prolyl-tRNA synthetase                                      |
| 458 | 1        | Q9HRK3 Q9HRK3 | Putative uncharacterized protein                            |
| 471 | 1        | Q9HMW6 Q9HMW6 | Putative uncharacterized protein                            |
| 472 | 1        | Q9HQV6 Q9HQV6 | Putative uncharacterized protein                            |
| 482 | 1        | Q9HMK6 Q9HMK6 | Putative uncharacterized protein                            |
| 490 | 1        | Q9HR54 Q9HR54 | Putative uncharacterized protein                            |
| 534 | 1        | Q9HPI6 Q9HPI6 | Putative uncharacterized protein                            |
| 576 | 1        | Q9HRR3 Q9HRR3 | Putative uncharacterized protein                            |
| 595 | 1        | Q9HRR7 Q9HRR7 | Putative uncharacterized protein                            |
| 596 | 1        | Q9HQB1 Q9HQB1 | Putative uncharacterized protein                            |
| 609 | 1        | Q9HRR6 Q9HRR6 | Putative uncharacterized protein                            |
| 632 | 1        | Q9HRE8 RTCA   | Probable RNA 3'-terminal phosphate cyclase                  |
| 650 | 1        | Q9HRP9 Q9HRP9 | Putative uncharacterized protein                            |
| 652 | 1        | Q48295 ARCC   | Carbamate kinase                                            |
| 654 | 1        | Q9HSE7 Q9HSE7 | Putative uncharacterized protein                            |
| 689 | 1        | Q9HRP5 Q9HRP5 | Putative uncharacterized protein                            |
| 694 | 1        | Q9HPV1 Q9HPV1 | Putative uncharacterized protein                            |
| 719 | 1        | O54633 O54633 | Putative uncharacterized protein                            |
| 748 | 1        | Q9HR26 Q9HR26 | Putative uncharacterized protein                            |

| hit  | peptides | accession     | description                                       |
|------|----------|---------------|---------------------------------------------------|
| 768  | 1        | Q9HPH6 Q9HPH6 | Cobalt transport protein                          |
| 901  | 1        | Q9HHQ7 Q9HHQ7 | Sn-glycerol-3-phosphate transport system permease |
| 1001 | 1        | Q9HRF3 Q9HRF3 | Putative uncharacterized protein                  |

END OF LIST VI

| hit                                                                                    | peptides | accession      | description                                             |
|----------------------------------------------------------------------------------------|----------|----------------|---------------------------------------------------------|
| <b>VII. Purple membrane; elastase digest; nLC-MALDI MS/MS; AVLI search specificity</b> |          |                |                                                         |
| 1                                                                                      | 50       | P02945 BACR    | Bacteriorhodopsin                                       |
| 2                                                                                      | 38       | P00772 ELA1    | Elastase-1 precursor - Sus scrofa                       |
| 4                                                                                      | 15       | Q9HMMW9 Q9HMMW | Dipeptide ABC transporter dipeptide-binding             |
| 5                                                                                      | 15       | Q48302 Q48302  | Precursor proteolipid                                   |
| 3                                                                                      | 13       | Q9HR99 Q9HR99  | Halocyanin-like                                         |
| 6                                                                                      | 11       | Q9HMI3 Q9HMI3  | Dipeptide ABC transporter ATP-binding                   |
| 7                                                                                      | 10       | Q9HN93 Q9HN93  | Halocyanin-like                                         |
| 9                                                                                      | 6        | Q9HMG3 Q9HMG3  | Putative uncharacterized protein                        |
| 10                                                                                     | 6        | Q9HN95 Q9HN95  | Cytochrome c oxidase subunit I                          |
| 12                                                                                     | 5        | Q9HSS1 Q9HSS1  | Phosphoglycerate dehydrogenase                          |
| 11                                                                                     | 4        | Q9HRQ9 Q9HRQ9  | Putative uncharacterized protein                        |
| 17                                                                                     | 4        | Q9HMMW4 Q9HMMW | Oligopeptide binding protein                            |
| 13                                                                                     | 3        | Q9HMF1 Q9HMF1  | Aconitase                                               |
| 14                                                                                     | 3        | Q9HRS0 Q9HRS0  | Putative uncharacterized protein                        |
| 15                                                                                     | 3        | Q9HM89 EF1A    | Elongation factor 1-alpha                               |
| 16                                                                                     | 3        | Q9HS26 Q9HS26  | Na <sup>+</sup> /H <sup>+</sup> antiporter              |
| 20                                                                                     | 3        | Q9HRL3 Q9HRL3  | F420H2:quinone oxidoreductase chain L                   |
| 21                                                                                     | 3        | Q9HM69 CSG     | Cell surface glycoprotein                               |
| 24                                                                                     | 3        | Q9HMX1 Q9HMX1  | Dipeptide ABC transporter permease                      |
| 47                                                                                     | 3        | Q9HN92 Q9HN92  | Putative uncharacterized protein                        |
| 18                                                                                     | 2        | Q9HRR1 Q9HRR1  | Putative uncharacterized protein                        |
| 22                                                                                     | 2        | Q9HM85 EF2     | Elongation factor 2                                     |
| 23                                                                                     | 2        | Q9HP48 Q9HP48  | NADH oxidase                                            |
| 27                                                                                     | 2        | Q9HS12 Q9HS12  | Phosphate ABC transporter permease                      |
| 28                                                                                     | 2        | Q9HRL1 Q9HRL1  | NADH dehydrogenase/oxidoreductase                       |
| 34                                                                                     | 2        | Q9HSA8 Q9HSA8  | Bifunctional short chain isoprenyl diphosphate synthase |
| 39                                                                                     | 2        | Q9HP76 Q9HP76  | Putative uncharacterized protein                        |
| 53                                                                                     | 2        | Q9HN43 CAPPA   | Phosphoenolpyruvate carboxylase                         |
| 59                                                                                     | 2        | Q9HHI2 Q9HHI2  | L-lactate permease                                      |
| 98                                                                                     | 2        | Q9HP01 Q9HP01  | Spermidine/putrescine ABC transporter permease          |
| 19                                                                                     | 1        | Q9HHR4 Q9HHR4  | Vng6268c                                                |
| 26                                                                                     | 1        | Q9HMT7 Q9HMT7  | Probable thiosulfate sulfurtransferase                  |
| 29                                                                                     | 1        | Q9HSM4 DHE42   | NADP-specific glutamate dehydrogenase B                 |
| 33                                                                                     | 1        | Q9HPA9 Q9HPA9  | TRK potassium uptake system protein                     |
| 36                                                                                     | 1        | Q9HRJ5 Q9HRJ5  | Putative uncharacterized protein                        |
| 37                                                                                     | 1        | Q9HNY2 Q9HNY2  | Putative uncharacterized protein                        |
| 38                                                                                     | 1        | Q9HP84 HTR4    | Halobacterial transducer protein 4                      |

| hit | peptides | accession     | description                                                 |
|-----|----------|---------------|-------------------------------------------------------------|
| 40  | 1        | Q9HR98 Q9HR98 | Cystathionine gamma-synthase                                |
| 43  | 1        | Q9HRS4 Q9HRS4 | Putative uncharacterized protein                            |
| 44  | 1        | Q9HS72 SECE   | Preprotein translocase subunit secE                         |
| 45  | 1        | Q9HPG8 Q9HPG8 | Ribonucleoside-diphosphate reductase                        |
| 46  | 1        | Q9HHN1 Q9HHN1 | Na <sup>+</sup> /H <sup>+</sup> antiporter                  |
| 48  | 1        | Q9HSM2 MUTS1  | DNA mismatch repair protein mutS 1                          |
| 50  | 1        | Q9HQ64 Q9HQ64 | Membrane anchor                                             |
| 51  | 1        | Q9HR22 Q9HR22 | Ribose ABC transporter permease                             |
| 52  | 1        | Q9HPQ2 Q9HPQ2 | Daunorubicin resistance ABC transporter ATP-binding protein |
| 54  | 1        | P25964 BACS1  | Sensory rhodopsin-1                                         |
| 55  | 1        | Q9HNK1 Q9HNK1 | Putative uncharacterized protein                            |
| 57  | 1        | Q9HSB5 Q9HSB5 | Putative uncharacterized protein                            |
| 61  | 1        | Q9HMZ3 Q9HMZ3 | Heterodisulfide reductase                                   |
| 66  | 1        | P16102 BACH   | Halorhodopsin                                               |
| 67  | 1        | Q9HRL9 Q9HRL9 | NADH dehydrogenase/oxidoreductase                           |
| 69  | 1        | Q9HQP2 Q9HQP2 | Transmembrane oligosaccharyl transferase                    |
| 71  | 1        | Q9HNR0 Q9HNR0 | Protein-export membrane protein                             |
| 76  | 1        | Q9HN02 Q9HN02 | Hemolysin protein                                           |
| 80  | 1        | Q9HPM1 Q9HPM1 | Precorrin isomerase                                         |
| 83  | 1        | Q9HMB7 Q9HMB7 | Probable carboxypeptidase                                   |
| 84  | 1        | Q9HMY7 Q9HMY7 | Putative uncharacterized protein                            |
| 86  | 1        | Q9HN37 Q9HN37 | Protein export                                              |
| 87  | 1        | Q9HND8 VATI   | V-type ATP synthase subunit I                               |
| 88  | 1        | Q9HPT9 Q9HPT9 | Carboxylesterase                                            |
| 89  | 1        | Q9HRN3 Q9HRN3 | Proteinase IV homolog                                       |
| 90  | 1        | Q9HQB8 Q9HQB8 | Putative uncharacterized protein                            |
| 91  | 1        | Q9HHV1 Q9HHV1 | Iron transport protein B                                    |
| 92  | 1        | Q9HN47 PRIL   | Probable DNA primase large subunit                          |
| 95  | 1        | Q9HN22 Q9HN22 | Putative uncharacterized protein                            |
| 96  | 1        | Q9HRL8 Q9HRL8 | NADH dehydrogenase/oxidoreductase                           |
| 103 | 1        | Q9HME2 Q9HME2 | Putative uncharacterized protein                            |
| 106 | 1        | Q9HQ90 Q9HQ90 | Putative uncharacterized protein                            |
| 108 | 1        | Q9HSA0 Q9HSA0 | Putative uncharacterized protein                            |
| 110 | 1        | Q9HQ63 DHSD   | Succinate dehydrogenase hydrophobic membrane anchor subunit |
| 113 | 1        | Q9HSW2 Q9HSW2 | Putative uncharacterized protein                            |
| 114 | 1        | Q9HRJ8 Q9HRJ8 | Heme synthase                                               |
| 115 | 1        | Q9HRT4 Q9HRT4 | Putative uncharacterized protein                            |
| 119 | 1        | Q9HNP7 Q9HNP7 | Putative uncharacterized protein                            |
| 125 | 1        | Q9HP66 Q9HP66 | Putative uncharacterized protein                            |
| 127 | 1        | Q9HPQ1 Q9HPQ1 | Sodium-and chloride-dependent transporter                   |

| hit | peptides | accession       | description                                  |
|-----|----------|-----------------|----------------------------------------------|
| 130 | 1        | Q9HQH2 Q9HQH2   | Putative uncharacterized protein             |
| 132 | 1        | Q9HQU3 Q9HQU3   | Putative uncharacterized protein             |
| 135 | 1        | Q9HM88 Q9HM88   | Homoserine dehydrogenase                     |
| 137 | 1        | Q9HQ19 Q9HQ19   | Iron                                         |
| 142 | 1        | Q9HP88 Q9HP88   | Phytoene dehydrogenase                       |
| 149 | 1        | Q9HMH4 Q9HMH4   | Putative uncharacterized protein             |
| 151 | 1        | Q9HRJ0 Q9HRJ0   | Putative uncharacterized protein             |
| 156 | 1        | Q9HMQ2 ASSY     | Argininosuccinate synthase                   |
| 161 | 1        | Q9HNE6 Q9HNE6   | Brp-like homolog                             |
| 166 | 1        | Q9HHV2 Q9HHV2   | Iron transport protein A                     |
| 170 | 1        | Q9HPN9 Q9HPN9   | CTAG modification methylase                  |
| 174 | 1        | Q9HPQ3 Q9HPQ3   | Putative uncharacterized protein             |
| 178 | 1        | Q9HSW6 CDC61    | Cell division control protein 6 homolog 1    |
| 182 | 1        | Q48325 TBPB     | TATA-box-binding protein B                   |
| 187 | 1        | Q07971 Q07971   | RepH protein                                 |
| 188 | 1        | P33518 COX1     | Cytochrome c oxidase polypeptide 1           |
| 189 | 1        | Q9HS30 Q9HS30   | Putative uncharacterized protein             |
| 190 | 1        | Q9HR04 Q9HR04   | Iron-binding protein                         |
| 192 | 1        | Q9HRR2 Q9HRR2   | Cytochrome b6                                |
| 193 | 1        | Q9HMJ2 Q9HMJ2   | Putative uncharacterized protein             |
| 195 | 1        | Q9HMU6 Q9HMU6   | Putative uncharacterized protein             |
| 198 | 1        | O54559 O54559   | Putative uncharacterized protein             |
| 208 | 1        | Q9HNB8 Q9HNB8   | Putative uncharacterized protein             |
| 212 | 1        | Q9HRJ7 Q9HRJ7   | ABC transporter, ATP-binding protein homolog |
| 232 | 1        | Q9HSQ7 Q9HSQ7   | ABC transport protein                        |
| 236 | 1        | Q9HR54 Q9HR54   | Putative uncharacterized protein             |
| 241 | 1        | Q9HN79 Q9HN79   | DNA damage-inducible protein                 |
| 246 | 1        | Q9HQU8 Q9HQU8   | Acetyl-CoA synthetase                        |
| 254 | 1        | Q9HSE1 Q9HSE1   | Phytoene dehydrogenase                       |
| 260 | 1        | Q9HRP5 Q9HRP5   | Putative uncharacterized protein             |
| 271 | 1        | Q9HRH6 Q9HRH6   | Putative uncharacterized protein             |
| 273 | 1        | Q9HR62 Q9HR62   | Putative uncharacterized protein             |
| 282 | 1        | Q9HRK3 Q9HRK3   | Putative uncharacterized protein             |
| 286 | 1        | O54662 O54662   | Putative uncharacterized protein             |
| 289 | 1        | O54610 O54610   | CydA                                         |
| 294 | 1        | Q9HMW6 Q9HMW    | Putative uncharacterized protein             |
| 296 | 1        | Q9HQV6 Q9HQV6   | Putative uncharacterized protein             |
| 303 | 1        | Q9HNNW7 Q9HNNW7 | Phosphoribosyl transferase                   |
| 309 | 1        | Q9HPF1 Q9HPF1   | Putative uncharacterized protein             |
| 332 | 1        | Q9HPY6 Q9HPY6   | Putative uncharacterized protein             |

| hit | peptides | accession     | description                                       |
|-----|----------|---------------|---------------------------------------------------|
| 375 | 1        | Q9HQY5 Q9HQY5 | Cell division inhibitor                           |
| 382 | 1        | Q9HRS8 Q9HRS8 | NADH dehydrogenase/oxidoreductase                 |
| 385 | 1        | Q9HQZ0 Q9HQZ0 | Acetyl-CoA synthetase                             |
| 388 | 1        | Q9HRR7 Q9HRR7 | Putative uncharacterized protein                  |
| 397 | 1        | Q9HHW5 Q9HHW5 | Sodium-dependent phosphate transporter            |
| 405 | 1        | Q9HRR6 Q9HRR6 | Putative uncharacterized protein                  |
| 420 | 1        | Q9HRC9 Q9HRC9 | Putative uncharacterized protein                  |
| 421 | 1        | Q9HQ23 Q9HQ23 | Putative uncharacterized protein                  |
| 433 | 1        | Q48295 ARCC   | Carbamate kinase                                  |
| 447 | 1        | Q9HS52 SYP    | Prolyl-tRNA synthetase                            |
| 458 | 1        | Q9HMQ8 Q9HMQ8 | D-lactate dehydrogenase                           |
| 462 | 1        | Q9HNS6 Q9HNS6 | Putative uncharacterized protein                  |
| 463 | 1        | Q9HMT5 Q9HMT5 | Putative uncharacterized protein                  |
| 469 | 1        | Q9HPV1 Q9HPV1 | Putative uncharacterized protein                  |
| 508 | 1        | Q9HRK2 Q9HRK2 | Putative uncharacterized protein                  |
| 548 | 1        | Q9HQM2 Q9HQM2 | Putative uncharacterized protein                  |
| 553 | 1        | Q9HP32 PYRG   | CTP synthase                                      |
| 647 | 1        | Q9HS38 Q9HS38 | Putative uncharacterized protein                  |
| 661 | 1        | Q9HHQ7 Q9HHQ7 | Sn-glycerol-3-phosphate transport system permease |
| 670 | 1        | Q9HQB1 Q9HQB1 | Putative uncharacterized protein                  |

END OF LIST VII

| hit                                                                                  | peptides | accession       | description                                             |
|--------------------------------------------------------------------------------------|----------|-----------------|---------------------------------------------------------|
| <b>VIII. Purple membrane; trypsin digest; nLC-MALDI MS/MS; KR search specificity</b> |          |                 |                                                         |
| 1                                                                                    | 8        | Q9HMW9 Q9HMMW   | Dipeptide ABC transporter dipeptide-binding             |
| 4                                                                                    | 6        | Q9HMMW4 Q9HMMW  | Oligopeptide binding protein                            |
| 7                                                                                    | 6        | Q9HMMZ3 Q9HMMZ3 | Heterodisulfide reductase                               |
| 11                                                                                   | 6        | Q9HMX1 Q9HMX1   | Dipeptide ABC transporter permease                      |
| 5                                                                                    | 5        | Q9HHN1 Q9HHN1   | Na <sup>+</sup> /H <sup>+</sup> antiporter              |
| 6                                                                                    | 5        | Q9HSA8 Q9HSA8   | Bifunctional short chain isoprenyl diphosphate synthase |
| 8                                                                                    | 5        | Q9HN95 Q9HN95   | Cytochrome c oxidase subunit I                          |
| 10                                                                                   | 5        | Q9HP76 Q9HP76   | Putative uncharacterized protein                        |
| 15                                                                                   | 5        | Q9HPB1 SECY     | Preprotein translocase subunit secY                     |
| 9                                                                                    | 4        | Q9HMI3 Q9HMI3   | Dipeptide ABC transporter ATP-binding                   |
| 12                                                                                   | 4        | Q9HRR3 Q9HRR3   | Putative uncharacterized protein                        |
| 14                                                                                   | 4        | Q9HNQ9 Q9HNQ9   | Protein-export membrane protein                         |
| 20                                                                                   | 4        | P02945 BACR     | Bacteriorhodopsin                                       |
| 2                                                                                    | 3        | Q9HRQ9 Q9HRQ9   | Putative uncharacterized protein                        |
| 3                                                                                    | 3        | Q9HHP3 Q9HHP3   | Vng6297c                                                |
| 16                                                                                   | 3        | Q9HS26 Q9HS26   | Na <sup>+</sup> /H <sup>+</sup> antiporter              |
| 18                                                                                   | 3        | Q9HRF2 Q9HRF2   | Putative uncharacterized protein                        |
| 21                                                                                   | 3        | Q9HS72 SECE     | Preprotein translocase subunit secE                     |
| 23                                                                                   | 3        | Q9HSQ7 Q9HSQ7   | ABC transport protein                                   |
| 27                                                                                   | 3        | Q9HRS0 Q9HRS0   | Putative uncharacterized protein                        |
| 30                                                                                   | 3        | Q9HHR4 Q9HHR4   | Vng6268c                                                |
| 32                                                                                   | 3        | Q9HQP2 Q9HQP2   | Transmembrane oligosaccharyl transferase                |
| 33                                                                                   | 3        | Q9HP89 Q9HP89   | Photolyase/cryptochrome                                 |
| 45                                                                                   | 3        | Q9HMU9 Q9HMU9   | Nitrite/nitrate reduction protein                       |
| 13                                                                                   | 2        | Q9HN93 Q9HN93   | Halocyanin-like                                         |
| 17                                                                                   | 2        | Q9HRL4 Q9HRL4   | NADH dehydrogenase/oxidoreductase-like protein          |
| 19                                                                                   | 2        | P33518 COX1     | Cytochrome c oxidase polypeptide 1                      |
| 22                                                                                   | 2        | Q9HN94 Q9HN94   | Cytochrome c oxidase subunit II                         |
| 25                                                                                   | 2        | Q9HRJ0 Q9HRJ0   | Putative uncharacterized protein                        |
| 26                                                                                   | 2        | Q9HSQ2 HTPX     | Probable protease htpX homolog                          |
| 28                                                                                   | 2        | Q9HRL3 Q9HRL3   | F420H2:quinone oxidoreductase chain L                   |
| 29                                                                                   | 2        | Q9HRR1 Q9HRR1   | Putative uncharacterized protein                        |
| 31                                                                                   | 2        | Q9HR99 Q9HR99   | Halocyanin-like                                         |
| 34                                                                                   | 2        | Q9HNE6 Q9HNE6   | Brp-like homolog                                        |
| 35                                                                                   | 2        | Q9HQ04 Q9HQ04   | Putative uncharacterized protein                        |
| 36                                                                                   | 2        | Q9HRM1 Q9HRM1   | NADH dehydrogenase/oxidoreductase-like protein          |
| 37                                                                                   | 2        | Q9HSC3 LONH     | Putative protease La homolog type                       |

| hit | peptides | accession     | description                                                 |
|-----|----------|---------------|-------------------------------------------------------------|
| 38  | 2        | Q9HRT0 Q9HRT0 | Putative uncharacterized protein                            |
| 39  | 2        | Q9HSC9 Q9HSC9 | N-methyltransferase homolog                                 |
| 40  | 2        | Q9HS12 Q9HS12 | Phosphate ABC transporter permease                          |
| 41  | 2        | Q9HRL8 Q9HRL8 | NADH dehydrogenase/oxidoreductase                           |
| 46  | 2        | P25964 BACS1  | Sensory rhodopsin-1                                         |
| 47  | 2        | Q9HMX0 Q9HMX0 | Dipeptide ABC transporter permease                          |
| 54  | 2        | Q9HRL1 Q9HRL1 | NADH dehydrogenase/oxidoreductase                           |
| 55  | 2        | Q9HMK7 Q9HMK7 | Glutaryl-CoA dehydrogenase                                  |
| 56  | 2        | Q9HR16 Q9HR16 | Proline permease                                            |
| 61  | 2        | Q9HPU7 Q9HPU7 | Bacteriorhodopsin related protein                           |
| 62  | 2        | Q9HR80 Q9HR80 | Putative uncharacterized protein                            |
| 63  | 2        | Q9HNN6 Q9HNN6 | Putative uncharacterized protein                            |
| 64  | 2        | P33741 HTR1   | Sensory rhodopsin I transducer                              |
| 76  | 2        | Q9HRC5 Q9HRC5 | Putative uncharacterized protein                            |
| 82  | 2        | P16102 BACH   | Halorhodopsin                                               |
| 24  | 1        | Q9HND9 Q9HND9 | H <sup>+</sup> -transporting ATP synthase subunit K         |
| 42  | 1        | Q9HMG3 Q9HMG3 | Putative uncharacterized protein                            |
| 43  | 1        | Q9HR22 Q9HR22 | Ribose ABC transporter permease                             |
| 44  | 1        | Q9HPD4 RL3    | 50S ribosomal protein L3P                                   |
| 48  | 1        | Q9HRN3 Q9HRN3 | Proteinase IV homolog                                       |
| 49  | 1        | Q9HRR2 Q9HRR2 | Cytochrome b6                                               |
| 50  | 1        | Q9HN07 Q9HN07 | Acylaminoacyl-peptidase                                     |
| 51  | 1        | Q9HN25 Q9HN25 | Putative uncharacterized protein                            |
| 52  | 1        | Q9HHS5 Q9HHS5 | Vng6251h                                                    |
| 53  | 1        | Q9HQU7 Q9HQU7 | Probable oxidoreductase                                     |
| 57  | 1        | Q9HSF7 TF2B7  | Transcription initiation factor IIB 7                       |
| 58  | 1        | Q9HMD1 SECG   | Preprotein translocase subunit secG                         |
| 59  | 1        | Q9HRZ2 Q9HRZ2 | Probable oxidoreductase                                     |
| 60  | 1        | Q9HQ64 Q9HQ64 | Membrane anchor                                             |
| 65  | 1        | Q9HPA6 Q9HPA6 | Htr-like protein                                            |
| 66  | 1        | Q9HRR0 Q9HRR0 | Putative uncharacterized protein                            |
| 67  | 1        | O51960 O51960 | Putative uncharacterized protein                            |
| 68  | 1        | Q9HND8 VATI   | V-type ATP synthase subunit I                               |
| 69  | 1        | Q9HQ63 DHSD   | Succinate dehydrogenase hydrophobic membrane anchor subunit |
| 70  | 1        | Q9HRC9 Q9HRC9 | Putative uncharacterized protein                            |
| 71  | 1        | Q9HT02 Q9HT02 | Putative uncharacterized protein                            |
| 72  | 1        | Q9HQ52 THYX   | Thymidylate synthase thyX                                   |
| 73  | 1        | Q9HT01 Q9HT01 | Putative uncharacterized protein                            |
| 74  | 1        | Q9HR62 Q9HR62 | Putative uncharacterized protein                            |
| 75  | 1        | Q9HRL2 Q9HRL2 | F420H2:quinone oxidoreductase chain M                       |



| hit | peptides | accession     | description                                                |
|-----|----------|---------------|------------------------------------------------------------|
| 77  | 1        | Q9HPQ5 Q9HPQ5 | Htr8 transducer                                            |
| 78  | 1        | Q9HRL9 Q9HRL9 | NADH dehydrogenase/oxidoreductase                          |
| 79  | 1        | Q9HSL5 Q9HSL5 | Cationic amino acid transporter                            |
| 80  | 1        | Q9HQU6 Q9HQU6 | Putative uncharacterized protein                           |
| 81  | 1        | Q9HN76 Q9HN76 | Pyruvate dehydrogenase beta subunit                        |
| 83  | 1        | Q48290 FTSZ   | Cell division protein ftsZ homolog                         |
| 84  | 1        | P57699 ATKB   | Potassium-transporting ATPase B chain                      |
| 85  | 1        | Q9HN02 Q9HN02 | Hemolysin protein                                          |
| 86  | 1        | Q9HR92 HTR6   | Halobacterial transducer protein 6                         |
| 87  | 1        | Q9HRM0 Q9HRM0 | NADH dehydrogenase/oxidoreductase                          |
| 88  | 1        | Q9HNK1 Q9HNK1 | Putative uncharacterized protein                           |
| 89  | 1        | Q9HRQ7 Q9HRQ7 | Putative uncharacterized protein                           |
| 90  | 1        | Q9HQ81 Q9HQ81 | TRK potassium uptake system protein                        |
| 91  | 1        | Q9HN58 Q9HN58 | Putative uncharacterized protein                           |
| 92  | 1        | Q9HQQ6 Q9HQQ6 | Glycosyl transferase-like                                  |
| 93  | 1        | Q9HS60 Q9HS60 | Putative uncharacterized protein                           |
| 94  | 1        | Q9HQP7 Q9HQP7 | Putative uncharacterized protein                           |
| 95  | 1        | Q9HSE0 Q9HSE0 | Putative uncharacterized protein                           |
| 96  | 1        | Q9HSA3 MFNA   | L-tyrosine decarboxylase                                   |
| 97  | 1        | Q9HPJ9 GCSPA  | Probable glycine dehydrogenase [decarboxylating] subunit 1 |
| 98  | 1        | Q9HNI9 Q9HNI9 | Transport protein                                          |
| 99  | 1        | Q9HRC1 Q9HRC1 | Putative uncharacterized protein                           |
| 100 | 1        | Q9HSE1 Q9HSE1 | Phytoene dehydrogenase                                     |
| 101 | 1        | O52005 O52005 | Putative uncharacterized protein                           |
| 102 | 1        | Q9HNG0 Q9HNG0 | Proline dehydrogenase                                      |
| 103 | 1        | Q9HPX5 Q9HPX5 | Htr-like protein                                           |
| 104 | 1        | Q9HR54 Q9HR54 | Putative uncharacterized protein                           |
| 105 | 1        | Q9HMH6 Q9HMH6 | Putative uncharacterized protein                           |
| 106 | 1        | Q9HPT0 Q9HPT0 | Putative uncharacterized protein                           |
| 107 | 1        | Q9HHH4 Q9HHH4 | Vng6397h                                                   |
| 108 | 1        | Q9HRS2 Q9HRS2 | Putative uncharacterized protein                           |
| 109 | 1        | Q9HR04 Q9HR04 | Iron-binding protein                                       |
| 110 | 1        | Q9HNM8 Q9HNM8 | Putative uncharacterized protein                           |
| 111 | 1        | Q9HQV1 Q9HQV1 | Putative uncharacterized protein                           |
| 112 | 1        | Q9HNS2 Q9HNS2 | Glycerol-3-phosphate dehydrogenase chain C                 |
| 113 | 1        | Q9HP84 HTR4   | Halobacterial transducer protein 4                         |
| 114 | 1        | Q9HMW2 Q9HMW  | Oligopeptide transport permease protein                    |
| 115 | 1        | Q9HPR5 Q9HPR5 | Cell division protein pelota                               |
| 116 | 1        | Q9HRK2 Q9HRK2 | Putative uncharacterized protein                           |
| 117 | 1        | Q9HRY6 Q9HRY6 | Probable acetyltransferase                                 |

| hit | peptides | accession     | description                                                       |
|-----|----------|---------------|-------------------------------------------------------------------|
| 118 | 1        | Q9HNB2 Q9HNB2 | DNA repair protein                                                |
| 119 | 1        | Q9HHI4 Q9HHI4 | Vng6379c                                                          |
| 120 | 1        | Q9HSJ6 Q9HSJ6 | Putative uncharacterized protein                                  |
| 121 | 1        | Q9HHS8 GVPO2  | Protein gvpO 2                                                    |
| 123 | 1        | Q9HMY6 Q9HMY6 | Putative uncharacterized protein                                  |
| 124 | 1        | Q9HP19 Q9HP19 | Putative uncharacterized protein                                  |
| 125 | 1        | Q9HNT0 Q9HNT0 | Putative uncharacterized protein                                  |
| 126 | 1        | Q9HQS2 Q9HQS2 | CDP-diacylglycerol-glycerol-3-phosphate 3-phosphatidyltransferase |
| 127 | 1        | Q9HQS6 Q9HQS6 | Putative uncharacterized protein                                  |
| 128 | 1        | Q9HQ42 Q9HQ42 | Putative uncharacterized protein                                  |
| 129 | 1        | Q9HHW0 Q9HHW0 | Vng6203h                                                          |
| 130 | 1        | Q9HQS5 Q9HQS5 | Putative uncharacterized protein                                  |
| 131 | 1        | Q9HQZ6 Q9HQZ6 | NADH-dependent flavin oxidoreductase                              |
| 132 | 1        | Q9HRH2 Q9HRH2 | Molybdenum-binding protein                                        |
| 133 | 1        | Q9HRF4 Q9HRF4 | Putative uncharacterized protein                                  |
| 134 | 1        | Q9HN17 Q9HN17 | 4-hydroxybutyrate CoA transferase                                 |
| 135 | 1        | Q9HQ56 Q9HQ56 | Putative uncharacterized protein                                  |
| 136 | 1        | O51999 O51999 | Repl                                                              |
| 137 | 1        | Q9HN83 SYW1   | Tryptophanyl-tRNA synthetase 1                                    |
| 138 | 1        | Q9HQM4 Q9HQM4 | Putative uncharacterized protein                                  |
| 139 | 1        | Q9HMS7 Q9HMS7 | DNA damage-inducible protein                                      |
| 140 | 1        | Q9HQB1 Q9HQB1 | Putative uncharacterized protein                                  |
| 141 | 1        | Q9HRS1 Q9HRS1 | Pantothenate metabolism flavoprotein                              |
| 142 | 1        | Q9HPN3 Q9HPN3 | Cobalamin biosynthesis                                            |
| 143 | 1        | Q9HM88 Q9HM88 | Homoserine dehydrogenase                                          |
| 144 | 1        | Q9HR33 Q9HR33 | Putative uncharacterized protein                                  |
| 145 | 1        | Q9HSS1 Q9HSS1 | Phosphoglycerate dehydrogenase                                    |
| 146 | 1        | Q9HSS0 Q9HSS0 | Putative uncharacterized protein                                  |
| 147 | 1        | Q9HS67 Q9HS67 | Putative uncharacterized protein                                  |
| 148 | 1        | Q9HRH6 Q9HRH6 | Putative uncharacterized protein                                  |
| 149 | 1        | Q9HI31 Q9HI31 | Vng6391h                                                          |
| 150 | 1        | Q9HRA1 Q9HRA1 | Htr6 transducer                                                   |
| 151 | 1        | Q9HQ54 Q9HQ54 | Putative uncharacterized protein                                  |
| 152 | 1        | Q9HP79 Q9HP79 | Agmatinase                                                        |
| 153 | 1        | Q9HSL0 Q9HSL0 | Putative uncharacterized protein                                  |
| 155 | 1        | Q9HQD7 HUTG   | Probable formimidoylglutamase                                     |
| 160 | 1        | Q9HNA3 Q9HNA3 | Putative uncharacterized protein                                  |
| 161 | 1        | Q9HS87 Q9HS87 | Putative uncharacterized protein                                  |
| 163 | 1        | Q9HPK0 GCSPB  | Probable glycine dehydrogenase [decarboxylating] subunit 2        |
| 167 | 1        | Q9HRU7 Q9HRU7 | Putative uncharacterized protein                                  |

| hit | peptides | accession       | description                          |
|-----|----------|-----------------|--------------------------------------|
| 168 |          | 1 Q9HN78 LIPA   | Probable lipoyl synthase             |
| 176 |          | 1 Q9HRT5 Q9HRT5 | Putative uncharacterized protein     |
| 178 |          | 1 Q9HMG7 Q9HMG7 | Ferrichrome ABC transporter permease |

END OF LIST VIII

| hit                                                                                | peptides | accession     | description                                             |
|------------------------------------------------------------------------------------|----------|---------------|---------------------------------------------------------|
| <b>IX. Purple membrane; trypsin digest; nLC-MALDI MS/MS; no search specificity</b> |          |               |                                                         |
| 1                                                                                  | 39       | P02945 BACR   | Bacteriorhodopsin                                       |
| 2                                                                                  | 22       | Q9HMW9 Q9HMW  | Dipeptide ABC transporter dipeptide-binding             |
| 4                                                                                  | 10       | Q9HHN1 Q9HHN1 | Na <sup>+</sup> /H <sup>+</sup> antiporter              |
| 6                                                                                  | 10       | Q9HMW4 Q9HMW  | Oligopeptide binding protein                            |
| 8                                                                                  | 9        | Q9HSA8 Q9HSA8 | Bifunctional short chain isoprenyl diphosphate synthase |
| 5                                                                                  | 8        | Q9HN95 Q9HN95 | Cytochrome c oxidase subunit I                          |
| 7                                                                                  | 8        | Q9HRR3 Q9HRR3 | Putative uncharacterized protein                        |
| 3                                                                                  | 7        | Q9HN93 Q9HN93 | Halocyanin-like                                         |
| 12                                                                                 | 7        | Q9HMX1 Q9HMX1 | Dipeptide ABC transporter permease                      |
| 9                                                                                  | 6        | Q48302 Q48302 | Precursor proteolipid                                   |
| 10                                                                                 | 6        | Q9HNQ9 Q9HNQ9 | Protein-export membrane protein                         |
| 13                                                                                 | 5        | Q9HMI3 Q9HMI3 | Dipeptide ABC transporter ATP-binding                   |
| 16                                                                                 | 5        | Q9HM69 CSG    | Cell surface glycoprotein                               |
| 21                                                                                 | 5        | Q9HP76 Q9HP76 | Putative uncharacterized protein                        |
| 11                                                                                 | 4        | Q9HHP3 Q9HHP3 | Vng6297c                                                |
| 15                                                                                 | 4        | Q9HMK0 Q9HMK0 | Putative uncharacterized protein                        |
| 18                                                                                 | 4        | Q9HMZ3 Q9HMZ3 | Heterodisulfide reductase                               |
| 19                                                                                 | 4        | Q9HSQ7 Q9HSQ7 | ABC transport protein                                   |
| 20                                                                                 | 4        | Q9HMG3 Q9HMG3 | Putative uncharacterized protein                        |
| 24                                                                                 | 4        | Q9HQP2 Q9HQP2 | Transmembrane oligosaccharyl transferase                |
| 35                                                                                 | 4        | Q9HHR4 Q9HHR4 | Vng6268c                                                |
| 14                                                                                 | 3        | Q9HRQ9 Q9HRQ9 | Putative uncharacterized protein                        |
| 17                                                                                 | 3        | Q9HRS0 Q9HRS0 | Putative uncharacterized protein                        |
| 25                                                                                 | 3        | Q9HPB1 SECY   | Preprotein translocase subunit secY                     |
| 28                                                                                 | 3        | Q9HRU5 Q9HRU5 | Immunogenic protein                                     |
| 29                                                                                 | 3        | Q9HRL3 Q9HRL3 | F420H2:quinone oxidoreductase chain L                   |
| 30                                                                                 | 3        | Q9HSQ2 HTPX   | Probable protease htpX homolog                          |
| 31                                                                                 | 3        | Q9HRR1 Q9HRR1 | Putative uncharacterized protein                        |
| 36                                                                                 | 3        | Q9HS72 SECE   | Preprotein translocase subunit secE                     |
| 41                                                                                 | 3        | Q9HQ04 Q9HQ04 | Putative uncharacterized protein                        |
| 22                                                                                 | 2        | P33518 COX1   | Cytochrome c oxidase polypeptide 1                      |
| 23                                                                                 | 2        | Q9HRM1 Q9HRM1 | NADH dehydrogenase/oxidoreductase-like protein          |
| 26                                                                                 | 2        | Q9HRL4 Q9HRL4 | NADH dehydrogenase/oxidoreductase-like protein          |
| 27                                                                                 | 2        | Q9HN94 Q9HN94 | Cytochrome c oxidase subunit II                         |
| 32                                                                                 | 2        | Q9HRF2 Q9HRF2 | Putative uncharacterized protein                        |
| 33                                                                                 | 2        | Q9HRJ0 Q9HRJ0 | Putative uncharacterized protein                        |
| 37                                                                                 | 2        | Q9HS26 Q9HS26 | Na <sup>+</sup> /H <sup>+</sup> antiporter              |

| hit | peptides | accession     | description                                                      |
|-----|----------|---------------|------------------------------------------------------------------|
| 38  | 2        | Q9HNN6 Q9HNN6 | Putative uncharacterized protein                                 |
| 39  | 2        | Q9HQV3 Q9HQV3 | Putative uncharacterized protein                                 |
| 40  | 2        | Q9HQF4 Q9HQF4 | Membrane protein                                                 |
| 43  | 2        | Q9HQA6 Q9HQA6 | Putative uncharacterized protein                                 |
| 44  | 2        | Q9HP89 Q9HP89 | Photolyase/cryptochrome                                          |
| 45  | 2        | O59634 O59634 | Methyl-accepting aerotaxis transducer protein                    |
| 46  | 2        | Q9HS51 Q9HS51 | Putative uncharacterized protein                                 |
| 47  | 2        | Q9HRT0 Q9HRT0 | Putative uncharacterized protein                                 |
| 49  | 2        | Q9HR99 Q9HR99 | Halocyanin-like                                                  |
| 51  | 2        | Q9HSC3 LONH   | Putative protease La homolog type                                |
| 52  | 2        | Q9HNE6 Q9HNE6 | Brp-like homolog                                                 |
| 64  | 2        | Q9HMX0 Q9HMX0 | Dipeptide ABC transporter permease                               |
| 34  | 1        | Q9HS12 Q9HS12 | Phosphate ABC transporter permease                               |
| 42  | 1        | P25964 BACS1  | Sensory rhodopsin-1                                              |
| 48  | 1        | Q9HR22 Q9HR22 | Ribose ABC transporter permease                                  |
| 50  | 1        | Q9HNR0 Q9HNR0 | Protein-export membrane protein                                  |
| 54  | 1        | Q9HPU7 Q9HPU7 | Bacteriorhodopsin related protein                                |
| 55  | 1        | Q9HRN3 Q9HRN3 | Proteinase IV homolog                                            |
| 56  | 1        | Q9HMU9 Q9HMU9 | Nitrite/nitrate reduction protein                                |
| 57  | 1        | Q9HN07 Q9HN07 | Acylaminoacyl-peptidase                                          |
| 58  | 1        | Q9HN92 Q9HN92 | Putative uncharacterized protein                                 |
| 59  | 1        | Q9HRL8 Q9HRL8 | NADH dehydrogenase/oxidoreductase                                |
| 60  | 1        | Q9HRJ9 Q9HRJ9 | Cytochrome c oxidase subunit 2                                   |
| 61  | 1        | Q9HHJ8 Q9HHJ8 | DNA polymerase B2                                                |
| 62  | 1        | Q9HR16 Q9HR16 | Proline permease                                                 |
| 63  | 1        | Q9HT01 Q9HT01 | Putative uncharacterized protein                                 |
| 68  | 1        | Q9HND8 VATI   | V-type ATP synthase subunit I                                    |
| 69  | 1        | Q9HQU7 Q9HQU7 | Probable oxidoreductase                                          |
| 71  | 1        | Q9HPD4 RL3    | 50S ribosomal protein L3P                                        |
| 72  | 1        | Q9HRL1 Q9HRL1 | NADH dehydrogenase/oxidoreductase                                |
| 74  | 1        | Q9HSF7 TF2B7  | Transcription initiation factor IIB 7                            |
| 75  | 1        | Q9HT00 GLMS   | Glucosamine--fructose-6-phosphate aminotransferase [isomerizing] |
| 78  | 1        | Q9HQ63 DHSD   | Succinate dehydrogenase hydrophobic membrane anchor subunit      |
| 81  | 1        | Q9HN25 Q9HN25 | Putative uncharacterized protein                                 |
| 87  | 1        | Q9HSL5 Q9HSL5 | Cationic amino acid transporter                                  |
| 88  | 1        | Q9HNB2 Q9HNB2 | DNA repair protein                                               |
| 93  | 1        | Q9HHS5 Q9HHS5 | Vng6251h                                                         |
| 94  | 1        | Q9HT02 Q9HT02 | Putative uncharacterized protein                                 |
| 105 | 1        | Q9HP72 HEM1   | Glutamyl-tRNA reductase                                          |
| 107 | 1        | Q9HRL9 Q9HRL9 | NADH dehydrogenase/oxidoreductase                                |

| hit | peptides | accession     | description                                    |
|-----|----------|---------------|------------------------------------------------|
| 110 | 1        | P00772 ELA1   | Elastase-1 precursor - Sus scrofa              |
| 111 | 1        | P71416 P71416 | Transducer HtF protein                         |
| 112 | 1        | Q9HQW0 Q9HQW0 | Putative uncharacterized protein               |
| 113 | 1        | Q9HQ64 Q9HQ64 | Membrane anchor                                |
| 114 | 1        | Q9HMK7 Q9HMK7 | Glutaryl-CoA dehydrogenase                     |
| 117 | 1        | Q9HSJ6 Q9HSJ6 | Putative uncharacterized protein               |
| 118 | 1        | Q9HP32 PYRG   | CTP synthase                                   |
| 125 | 1        | Q9HPA6 Q9HPA6 | Htr-like protein                               |
| 126 | 1        | Q9HNK1 Q9HNK1 | Putative uncharacterized protein               |
| 128 | 1        | Q9HRD0 Q9HRD0 | Anion permease                                 |
| 129 | 1        | Q9HP01 Q9HP01 | Spermidine/putrescine ABC transporter permease |
| 130 | 1        | Q9HRC9 Q9HRC9 | Putative uncharacterized protein               |
| 132 | 1        | Q9HMD1 SECG   | Preprotein translocase subunit secG            |
| 134 | 1        | Q9HRU7 Q9HRU7 | Putative uncharacterized protein               |
| 136 | 1        | Q9HQQ5 Q9HQQ5 | Probable transport protein                     |
| 139 | 1        | Q9HQ03 Q9HQ03 | Putative uncharacterized protein               |
| 150 | 1        | P16102 BACH   | Halorhodopsin                                  |
| 158 | 1        | Q9HNT9 Q9HNT9 | Putative uncharacterized protein               |
| 159 | 1        | Q9HPX0 Q9HPX0 | Aspartate-semialdehyde dehydrogenase           |
| 160 | 1        | Q9HRZ2 Q9HRZ2 | Probable oxidoreductase                        |
| 163 | 1        | Q9HR62 Q9HR62 | Putative uncharacterized protein               |
| 164 | 1        | Q9HRY9 Q9HRY9 | Putative uncharacterized protein               |
| 169 | 1        | Q9HMS1 Q9HMS1 | Putative uncharacterized protein               |
| 170 | 1        | Q9HR07 Q9HR07 | Putative uncharacterized protein               |
| 197 | 1        | O51960 O51960 | Putative uncharacterized protein               |
| 199 | 1        | Q9HS48 Q9HS48 | Putative uncharacterized protein               |
| 202 | 1        | Q9HQW3 Q9HQW3 | Putative uncharacterized protein               |
| 213 | 1        | Q9HS33 Q9HS33 | Multidrug resistance protein homolog           |
| 220 | 1        | Q9HSA0 Q9HSA0 | Putative uncharacterized protein               |
| 230 | 1        | Q9HN82 ENDA   | tRNA-splicing endonuclease                     |
| 234 | 1        | Q9HN85 Q9HN85 | Phosphomannomutase                             |
| 285 | 1        | Q9HNZ0 NADB   | L-aspartate oxidase                            |
| 301 | 1        | Q9HSJ5 Q9HSJ5 | Putative uncharacterized protein               |
| 339 | 1        | Q9HQ52 THYX   | Thymidylate synthase thyX                      |
| 344 | 1        | Q9HN76 Q9HN76 | Pyruvate dehydrogenase beta subunit            |
| 375 | 1        | Q48290 FTSZ   | Cell division protein ftsZ homolog             |
| 394 | 1        | Q9HQQ6 Q9HQQ6 | Glycosyl transferase-like                      |
| 395 | 1        | Q9HNU0 Q9HNU0 | Formyltetrahydrofolate deformylase             |
| 454 | 1        | P17103 Y1111  | Uncharacterized GTP-binding protein VNG1111G   |
| 508 | 1        | Q9HRM0 Q9HRM0 | NADH dehydrogenase/oxidoreductase              |

| hit | peptides | accession     | description                      |
|-----|----------|---------------|----------------------------------|
| 536 | 1        | O51958 O51958 | Putative uncharacterized protein |
| 635 | 1        | Q9HSM8 Q9HSM8 | Oxalate/formate antiporter       |

END OF LIST IX
