# Supplementary material
Source: PubMed Central journal article supplement (PMC2689761)
Supplement: M800223-MCP200_5.pdf [file M800223-MCP200_5.pdf]

this file contains sequence coverage, predicted TM helix data and the number of tryptic cleavage sites of all membrane proteins among the top 50 CB nLC-ESI/MALDI proteins and BR

|                                             | <b>pages</b> |
|---------------------------------------------|--------------|
| nLC-ESI CB membrane proteins among top 50   | <b>2-27</b>  |
| nLC-MALDI CB membrane proteins among top 50 | <b>28-42</b> |
| BR nLC-ESI and nLC-MALDI                    | <b>43-44</b> |

Cg1537 GLUCOSE-SPECIFIC ENZYME II BC COMPONENT OF PTS

ESI 10TMH 72.5 kDa 18 Arg 29 Lys

|            |            |            |            |            |            |
|------------|------------|------------|------------|------------|------------|
| 10         | 20         | 30         | 40         | 50         | 60         |
| MASKLTTTSQ | HILENLGGPD | NITSMTHCAT | RLRFQVKDQS | IVDQQEIDSD | PSVLGVVPQG |
| 70         | 80         | 90         | 100        | 110        | 120        |
| STGMQVVMGG | SVANYQEIIL | KLDGMKHFAD | GEATESSSKK | EYGGVRGKYS | WIDYAFEFLS |
| 130        | 140        | 150        | 160        | 170        | 180        |
| DTFRPILWAL | LGASLIITLL | VLADTFGLQD | FRAPMDEQPD | TYVFLHSMWR | SVFYFLPIMV |
| 190        | 200        | 210        | 220        | 230        | 240        |
| GATAARKLGA | NEWIGAAIPA | ALLTPEFLAL | GSAGDTVTVF | GLPMVLNDYS | GQVFPPLIAA |
| 250        | 260        | 270        | 280        | 290        | 300        |
| IGLYWVEKGL | KKIPEAVQM  | VFVPPFSLLI | MIPATAFLLG | PFGIGVNGI  | SNLLEAINNF |
| 310        | 320        | 330        | 340        | 350        | 360        |
| SPFILSIVIP | LLYPFLVPLG | LHWPLNAIMI | QNINTLGYDF | IQGPMGAWNF | ACFGLVTGVF |
| 370        | 380        | 390        | 400        | 410        | 420        |
| LLSIKERNKA | MRQVSLGGML | AGLLGGISEP | SLYGVLLRFK | KTYFRLLPGC | LAGGIVMGIF |
| 430        | 440        | 450        | 460        | 470        | 480        |
| DIKAYAFVFT | SLLTIPAMDP | WLGYTIGIAV | AFFVSMFLVL | ALDYRSNEER | DEARAKVAAD |
| 490        | 500        | 510        | 520        | 530        | 540        |
| KQAEEDLKA  | ANATPAAPVA | AAGAGAGAGA | GAAAGAATAV | AAKPKLAAGE | VVDIVSPLEG |
| 550        | 560        | 570        | 580        | 590        | 600        |
| KAIPLSEVPD | PIFAAGKLG  | GIAIQPTGNT | VVAPADATVI | LVQKSGHAVA | LRLDGVEIIL |
| 610        | 620        | 630        | 640        | 650        | 660        |
| VHVGLDTVQL | GGEGFTVHVE | RRQQVKAGDP | LITFDADFIR | SKDLPLITPV | VVSNAAKFGE |
| 670        | 680        | 690        |            |            |            |
| IEGIPADQAN | SSTTVIKVNG | KNE        |            |            |            |

EXTRACELLULAR

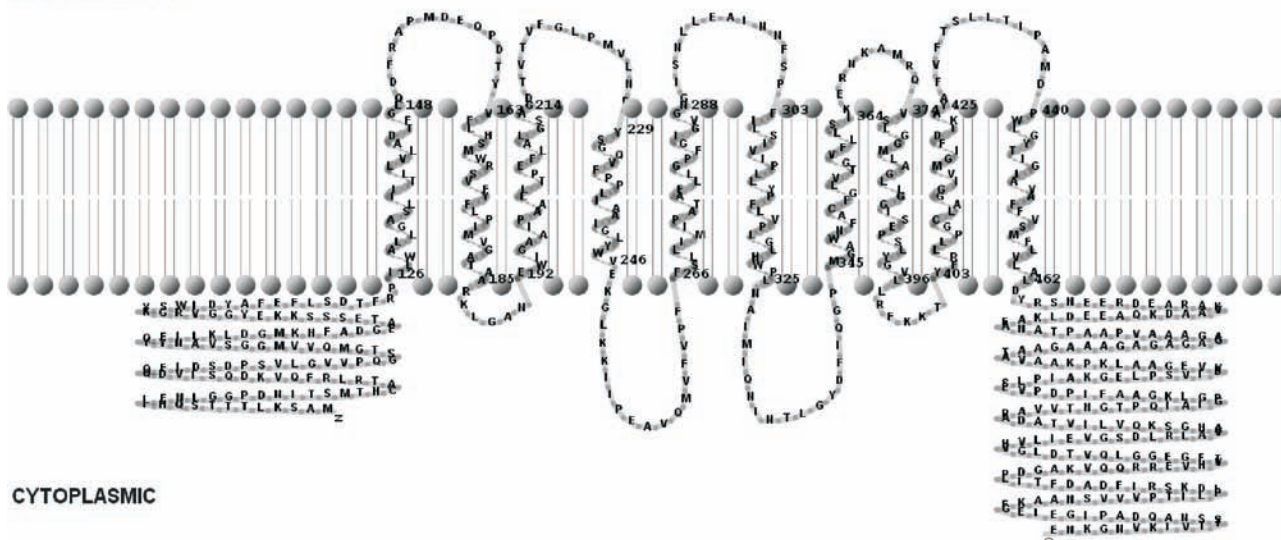

Cg2120 SUGAR SPECIFIC PTS SYSTEM, FRUCTOSE/MANNITOL-SPECIFIC TRANSPORT PROTEIN

ESI 9TMH 70.4 kDa 20 Arg 27 Lys

|            |            |            |            |            |            |
|------------|------------|------------|------------|------------|------------|
| 10         | 20         | 30         | 40         | 50         | 60         |
| MNSVNNSSLV | RLDVDFGDST | TDVINNLATV | IFDAGRASSA | DALAKDALDR | EAKSGTGVPG |
| 70         | 80         | 90         | 100        | 110        | 120        |
| QVAIPHCRSE | AVSVPTLGFA | RLSKGVDFSG | PDGDANLVFL | IAAPAGGGKE | HLKILSKLAR |
| 130        | 140        | 150        | 160        | 170        | 180        |
| SLVKKDFIKA | LQEATTEQEI | VDVDAVLNP  | APKTTEPAAA | PAAAAVAESG | AASTSVTRIV |
| 190        | 200        | 210        | 220        | 230        | 240        |
| AITACPTGIA | HTYMAADSLT | QNAEGRDDVE | LVVETQGSSA | VTPVDPKIEE | AADAVIFATD |
| 250        | 260        | 270        | 280        | 290        | 300        |
| VGVKDRERFA | GKPVIESGVK | RAINEPAKMI | DEAIAASKNP | NARKVSGSGV | AASAETTGEK |
| 310        | 320        | 330        | 340        | 350        | 360        |
| LGWVKRIQQA | VMTGVSYMVP | FVAAGLLLLA | LGFAFGGYDM | ANGWQAIATQ | FSLTNLPGNT |
| 370        | 380        | 390        | 400        | 410        | 420        |
| VDVDGVAMTF | ERSGFLLYFG | AVLFATGQAA | MGFIVAALSG | YTAYALAGRP | GIAPGFVGGG |
| 430        | 440        | 450        | 460        | 470        | 480        |
| ISVTIGAGFI | GGLVTGILAG | LIALWIGSWK | VPRVVQSLMP | VVIIPLLTSV | VVGLVMYLLL |
| 490        | 500        | 510        | 520        | 530        | 540        |
| GRPLASIMTG | LQDWLSSMSG | SSAILLGIIL | GLMMCFDLGG | PVNKAAYLFG | TAGLSTGDQA |
| 550        | 560        | 570        | 580        | 590        | 600        |
| SMEIMAAIMA | AGMVPPIALS | IATLLRKKLF | TPAEQENGKS | SWLLGLAFVS | EGAIPFAAAD |
| 610        | 620        | 630        | 640        | 650        | 660        |
| PFRVIPAMMA | GGATTGAISM | ALGVGSRAPH | GGIFVVWAIE | PWWGWLIALA | AGTIVSTIVV |
| 670        | 680        | 690        |            |            |            |
| IALKQFWPNK | AVAAEVAKQE | AQQAAVNA   |            |            |            |

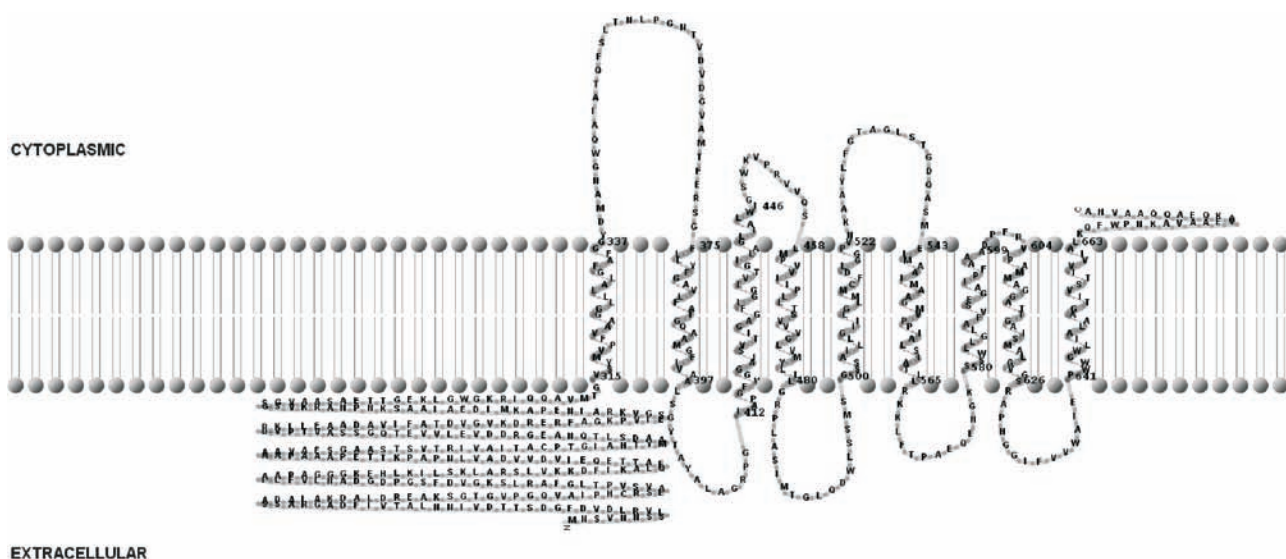

Cg2925 ENZYME II SUCROSE PROTEIN

ESI 10TMH 69.1 kDa 14 Arg 29 Lys

|            |            |            |            |            |             |
|------------|------------|------------|------------|------------|-------------|
| 10         | 20         | 30         | 40         | 50         | 60          |
| MDHKDLAQR  | LRDIGGEDNI | VAAAHCATRL | RLVLKDTKDV | DRQSLDDDDP | LKGTFFETGGM |
| 70         | 80         | 90         | 100        | 110        | 120         |
| FQIIVGPGDV | DHVFKELD   | TSKDIAVSTE | QLKDVVANNA | NWFSRAVKVL | ADIFVPLIPI  |
| 130        | 140        | 150        | 160        | 170        | 180         |
| LVGGGLLMAI | NNVLAQDLF  | GPQSLVEMFP | QISGVAEMIN | LMASAPFAFL | PVLVGFATATK |
| 190        | 200        | 210        | 220        | 230        | 240         |
| RFGGNEFLGA | GIGMAMVFP  | LVNGYDVAAT | MAAGEMPMWS | LFGLDVAQAG | YQGTVLPVPLV |
| 250        | 260        | 270        | 280        | 290        | 300         |
| VSWILATIEK | FLHKRLKGT  | DFLITPVLTL | LLTGFLTFIA | IGPAMRWVD  | VLAHGLQGLY  |
| 310        | 320        | 330        | 340        | 350        | 360         |
| DFGGPVGGLL | FGLVYSPIVI | TGLHQSFPP  | ELELEFNQGS | FIFATASMAN | IAQGAACLAV  |
| 370        | 380        | 390        | 400        | 410        | 420         |
| FFLAKSEK   | GLAGASGVSA | VLGITEPAIF | GVNLRLRWPF | FIGIGTAAIG | GALIALFNIK  |
| 430        | 440        | 450        | 460        | 470        | 480         |
| AVALGAAGFL | GVVSIDAPDM | VMFLVCAVVT | FFIAFGAAIA | YGLYLVRNG  | SIDPDATAAP  |
| 490        | 500        | 510        | 520        | 530        | 540         |
| VPAGTTKAEA | EAPAEFSNDS | TIIQAPLTGE | AIALSSVSDA | MFASGKLGSG | VAIVPTKGQL  |
| 550        | 560        | 570        | 580        | 590        | 600         |
| VSPVSGKIVV | AFPSGHAFV  | RTKAEDGSNV | DILMHIGFDT | VNLNGTHFNP | LKKQGDEVKA  |
| 610        | 620        | 630        | 640        | 650        | 660         |
| GELLCEFDID | AIKAAGYEVT | TPIVVSNYKK | TGPVNTYGLG | EIEAGANLLN | VAKKEAVPAT  |
| 670        |            |            |            |            |             |

P

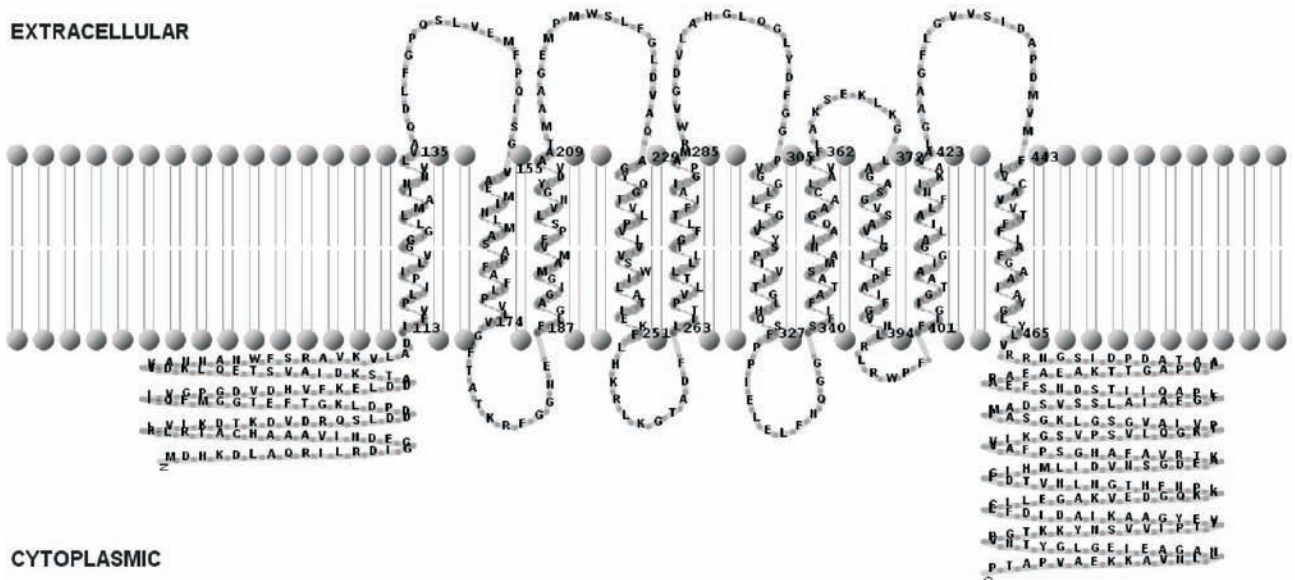

Cg2409 CYTOCHROME C OXIDASE CHAIN II

ESI 3TMH 39.6 kDa 15 Arg 14 Lys

|            |            |            |            |            |             |
|------------|------------|------------|------------|------------|-------------|
| 10         | 20         | 30         | 40         | 50         | 60          |
| MEQQNKRGLK | RKALLGGVLG | LGGLAMAGCE | VAPPGGVLGD | FLRMGWPDGI | TPEAVAMGNF  |
| 70         | 80         | 90         | 100        | 110        | 120         |
| WSVWVAAWI  | IGIIMWGLFL | TAIFAWGAKR | AEKRGEGEFP | KQLQYNVPLE | LVLTIIVPIII |
| 130        | 140        | 150        | 160        | 170        | 180         |
| VMVLFFFTQ  | TQDKVTALDK | NPEVTVDVTA | YQWNWKFYGS | EIDGSLAPGG | QDYQGSUPER  |
| 190        | 200        | 210        | 220        | 230        | 240         |
| QAAAEASKKD | PSGDNPIHGN | SKSDVSYLEF | NRIETLGTTD | EIPVMVLPVN | TPIEFNLASA  |
| 250        | 260        | 270        | 280        | 290        | 300         |
| DVAHSFWVPE | FLFKRDAYAH | PEANKSQRVF | QIEEITEEGA | FVGRCAEMCG | TYHAMNFEL   |
| 310        | 320        | 330        | 340        | 350        | 360         |
| RVVDRDSFAE | YISFRDSNP  | ATNAQALEHI | GQAPYATSTS | PFVSDRTATR | DGENTQSNA   |

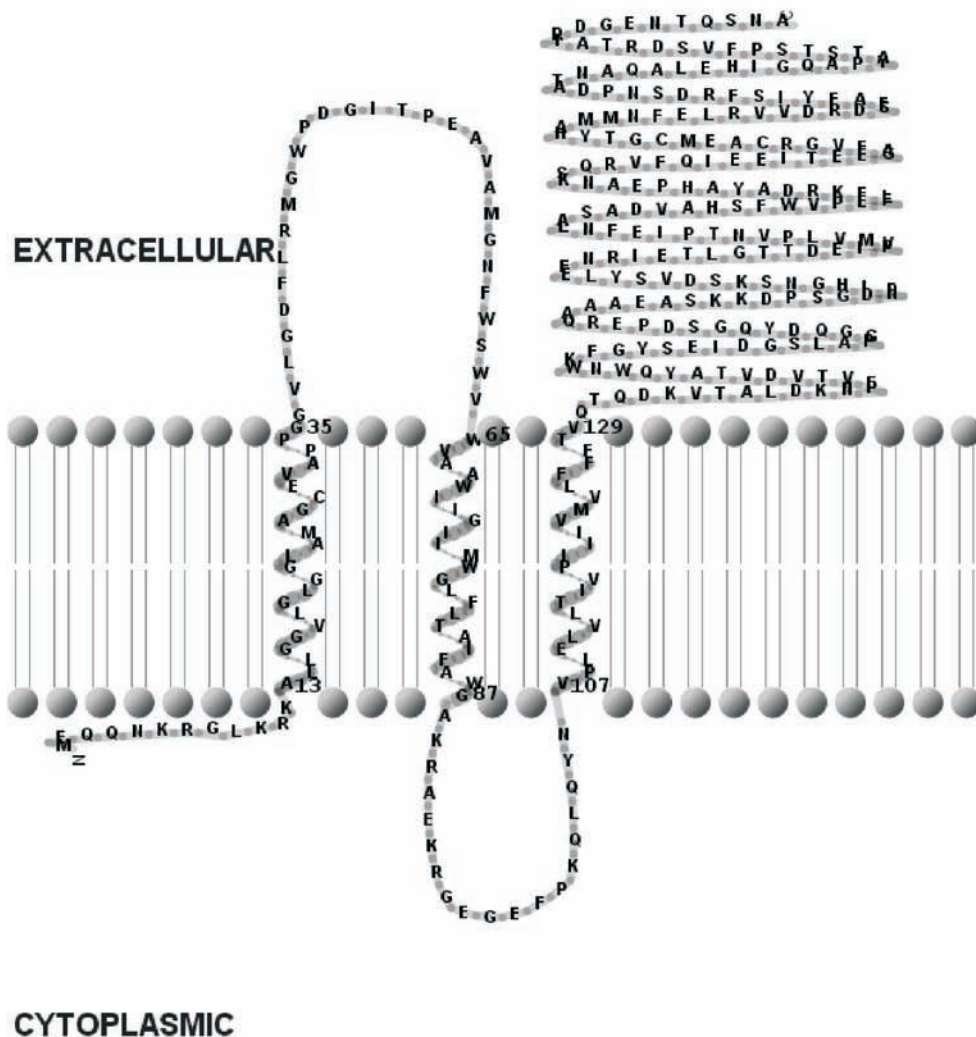

Cg2404 RIESKE IRON-SULFUR PROTEIN

ESI 3TMH 45.1 kDa 22 Arg 15 Lys

|            |            |             |            |            |            |
|------------|------------|-------------|------------|------------|------------|
| 10         | 20         | 30          | 40         | 50         | 60         |
| MSNNNDKQYT | TQELNAMSNE | DLARLGTELD  | DVTIAYRKER | FPIANDPAEK | RAARAVTFWL |
| 70         | 80         | 90          | 100        | 110        | 120        |
| VLGIIGGLGF | LATYIFWPWE | YKAHGDEGLL  | AYTLYTPMLG | ITSGLCILSL | GFAVVLYVKK |
| 130        | 140        | 150         | 160        | 170        | 180        |
| FIPEEIAVQR | RHDGPSEEVD | RRTIVALLND  | SWQTSTLGRR | KLIMGLAGGG | AVLAGLTIIA |
| 190        | 200        | 210         | 220        | 230        | 240        |
| PMGGMIKNPW | NPKEGPMDVQ | GDGTLWTSGW  | TLVENDVKVY | LGRDTAAIAE | SHTDATGEHW |
| 250        | 260        | 270         | 280        | 290        | 300        |
| STTGVSRLVR | MRPEDLAAAS | METVFPPLPAE | MVNDGAEYDP | AKDVYEHQMH | SVHGPRNAVM |
| 310        | 320        | 330         | 340        | 350        | 360        |
| LIRLRTADAE | KVIEREGQES | FHYGDYYAYS  | KICTHIGCPT | SLYEAQTNRI | LCPCHQSQFD |
| 370        | 380        | 390         | 400        | 410        |            |
| ALHYGKPVFG | PAARALPQLP | ITVDEEGYLI  | AAGNFIEPLG | PAFWERKS   |            |

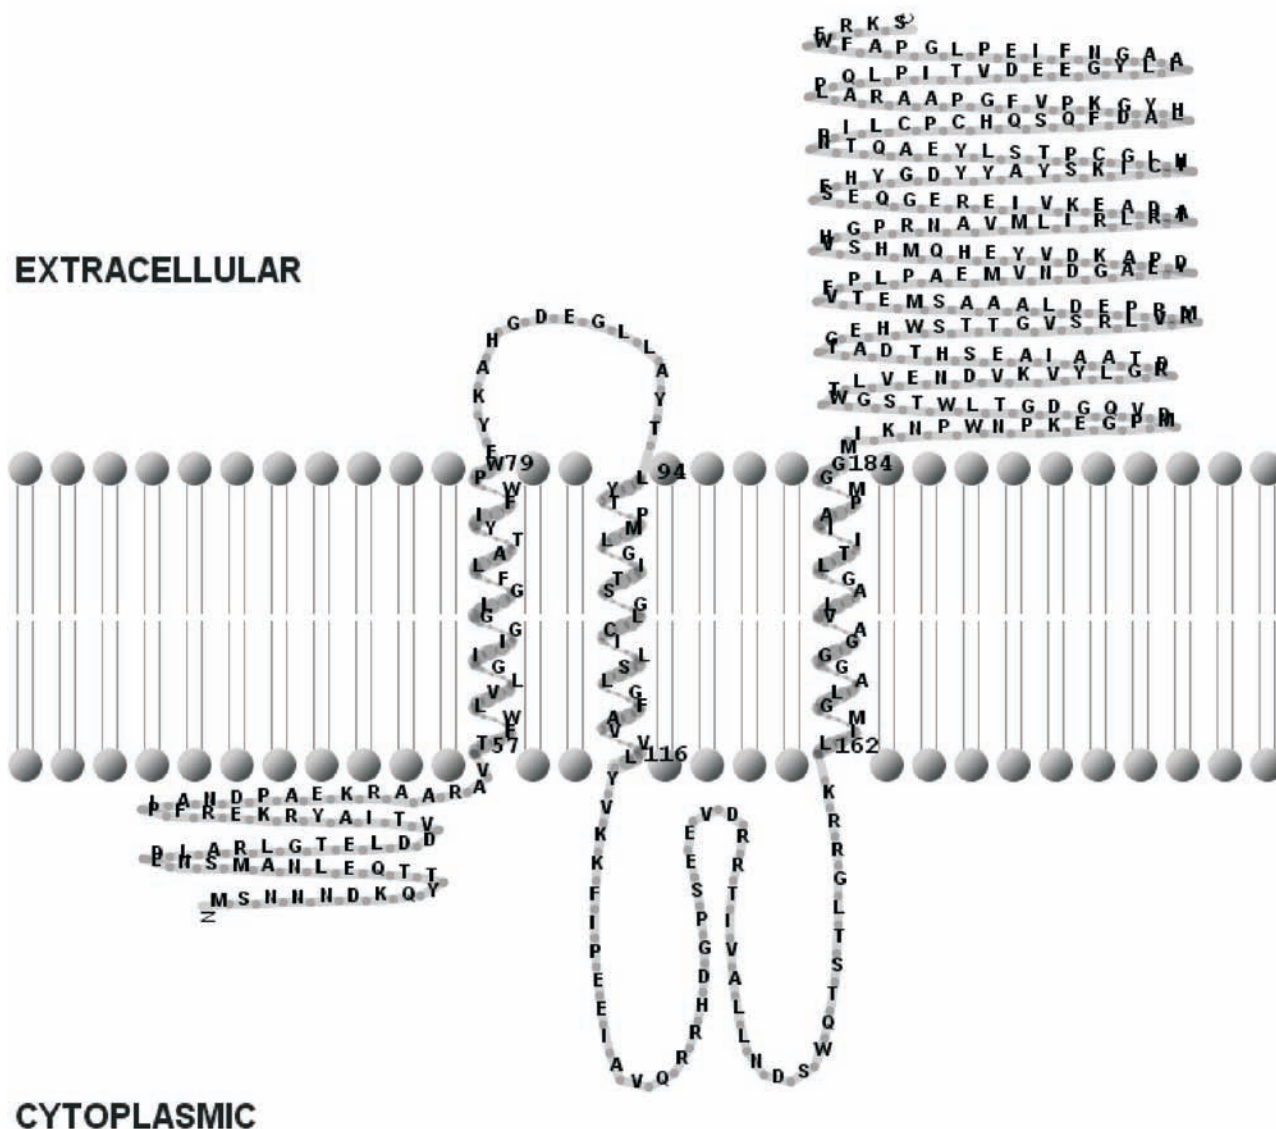

Cg3138 MEMBRANE PROTEASE SUBUNIT, STOMATIN/PROHIBITIN HOMOLOG

ESI 2TMH 34.7 kDa 17 Arg 6 Lys

|            |            |            |            |            |            |
|------------|------------|------------|------------|------------|------------|
| 10         | 20         | 30         | 40         | 50         | 60         |
| MSTIEERTPG | AVATEPVGHE | GARVSINEKN | VWSLGAGPAA | FALLAMIVLM | IASGVFFAQS |
| 70         | 80         | 90         | 100        | 110        | 120        |
| INTLENDGGG | TLAVTGLIAS | IVVFTVALVV | TITSVKVVSP | GHTLTVQFFG | RYIGTLRRTG |
| 130        | 140        | 150        | 160        | 170        | 180        |
| LSFVPLSVT  | KKVSVRVRNF | ETNEAKVNDY | NGNPINIAAI | IVWQVADTAQ | ASFSVEDFEE |
| 190        | 200        | 210        | 220        | 230        | 240        |
| FLHQQAESAL | RHVATQHPYD | SPVDGRVSLR | GATDEVSEEL | ADEVAQRAAV | AGLEIVEARI |
| 250        | 260        | 270        | 280        | 290        | 300        |
| SSLSYAPEIA | QAMLQRQQAS | AIVDAREKIV | EGAVTMVETA | LDQLEQREIV | DLDPERRAAM |
| 310        | 320        | 330        |            |            |            |
| VSNLLVVLCS | DTNAQPIVNA | GSLYQ      |            |            |            |

EXTRACELLULAR

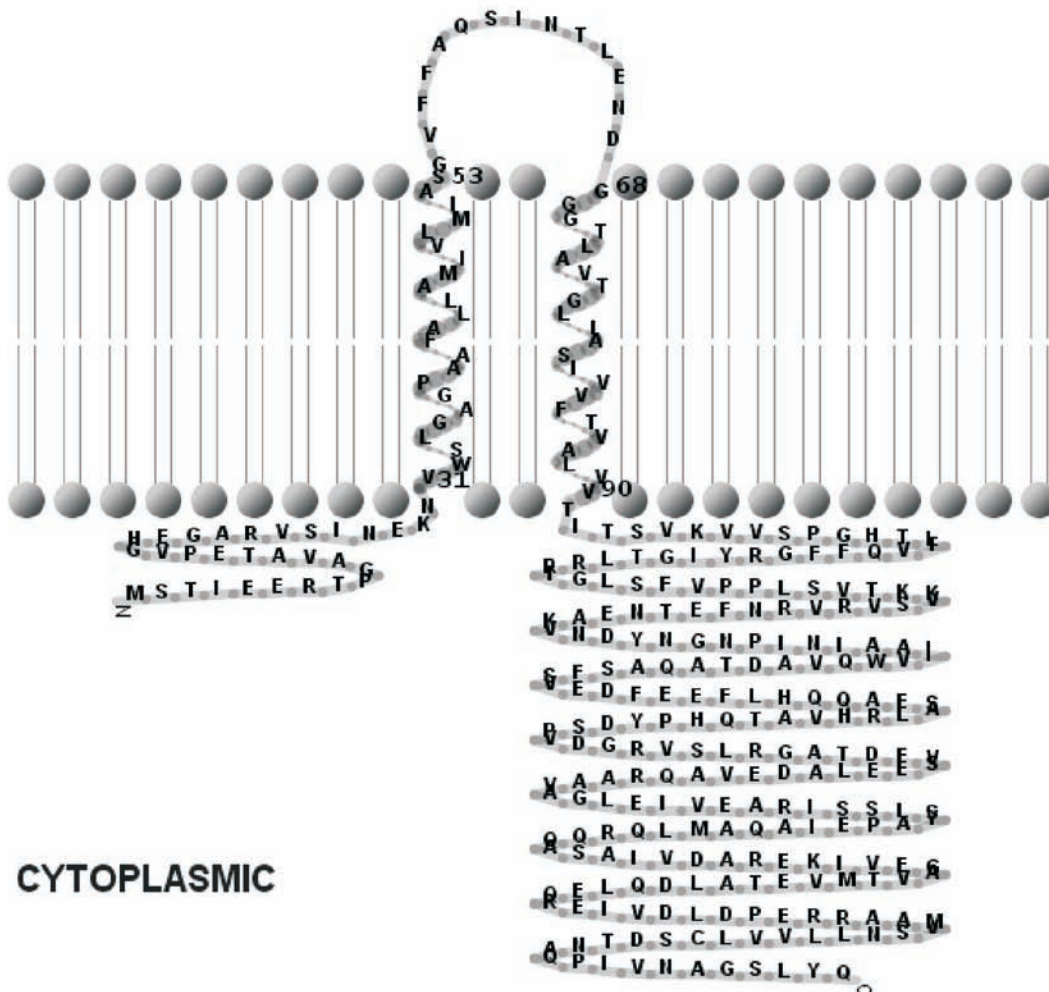

# Cg2780 PROBABLE CYTOCHROME C OXIDASE POLYPEPTIDE SUBUNIT

ESI 12TMH 65.0 kDa 21 Arg 10 Lys

|                   |                   |                   |                   |                   |                   |
|-------------------|-------------------|-------------------|-------------------|-------------------|-------------------|
| 10                | 20                | 30                | 40                | 50                | 60                |
| MTAVAPRVVDG       | HVAPQRPEPT        | GHARKGSKAW        | LMMT'TTDHKQ       | LGIMYIIMSF        | SFFFLGGLMA        |
| 70                | 80                | 90                | 100               | 110               | 120               |
| LLIRAELFTP        | GLQFLSNEQF        | NQLFTMHGTV        | MLLLYGTPIV        | WGFANYVLPL        | QIGAPDVAFP        |
| 130               | 140               | 150               | 160               | 170               | 180               |
| RLNAFGFWIT        | TVGGVAMLTG        | <u>FLTPGGAADF</u> | <u>GWTMYSPLSD</u> | <u>AIHSPGLGSD</u> | MWIVGVGATG        |
| 190               | 200               | 210               | 220               | 230               | 240               |
| IGSVASAINM        | <u>LTTILCLRAP</u> | GMTMFRMPIF        | TWNIFVSVL         | <u>ALLIFPLLLA</u> | <u>AALGVLYDRK</u> |
| 250               | 260               | 270               | 280               | 290               | 300               |
| LGGHLYDPAN        | GGSLWQHLF         | WFFGHPEVYV        | <u>LALPFFGIVS</u> | <u>EIIPVFSRKP</u> | MFGYVGLIFA        |
| 310               | 320               | 330               | 340               | 350               | 360               |
| TLSIGALSMA        | VWAHHMFVTG        | AVLLPFFSEFM       | TFLISVPTGV        | KFFNWVGTMW        | KGHITWETPM        |
| 370               | 380               | 390               | 400               | 410               | 420               |
| IWSVGFMAF         | <u>LFGGLTGIML</u> | <u>ASPPLDFHLA</u> | DSYFLIAHFH        | YTLFGTVVFA        | SCAGVYFWFP        |
| 430               | 440               | 450               | 460               | 470               | 480               |
| KMTGRMMDER        | LGKIHFWLTF        | VGFHGTFLIQ        | HWVGNMGMPR        | <u>RYADYLDSDG</u> | <u>FTIYNQISTV</u> |
| 490               | 500               | 510               | 520               | 530               | 540               |
| FSELLGLSVI        | <u>PFIWNVFKSW</u> | <u>RYGELVTVDD</u> | <u>PWGYGNSLEW</u> | <u>ATSCPPPRHN</u> | <u>FASLPRIRSE</u> |
| 550               | 560               | 570               | 580               | 590               |                   |
| <u>RPAFELHYPH</u> | <u>MIERMRAEAH</u> | TGHDDINAP         | ELGTAPALAS        | DSSR              |                   |

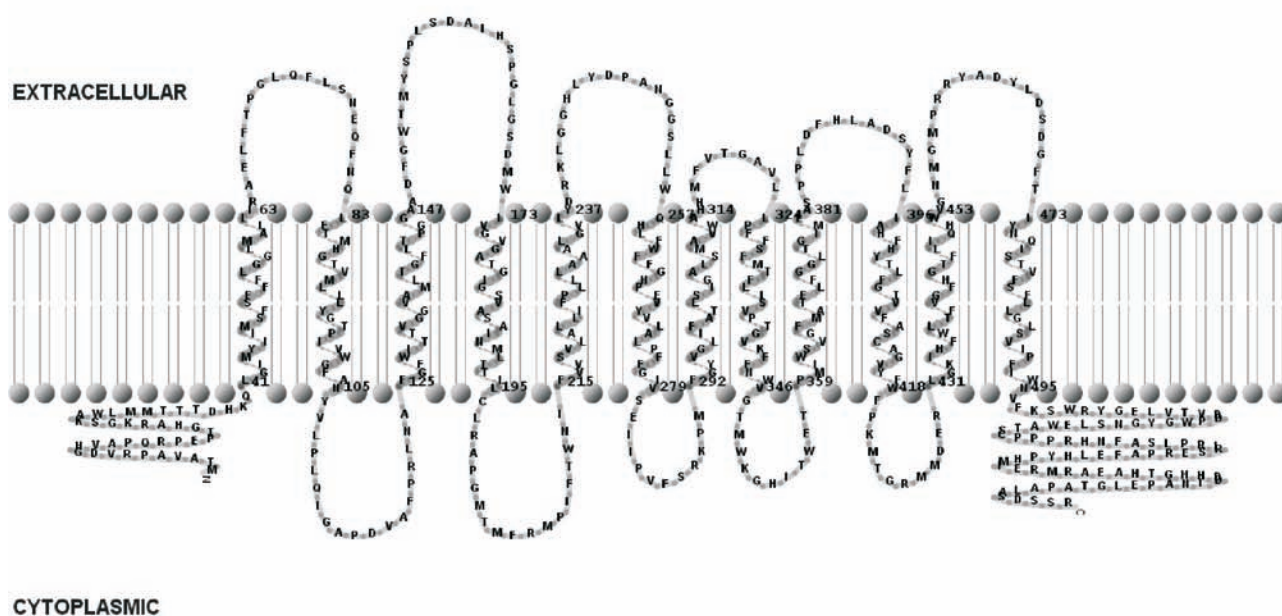



Cg2403 CYTOCHROME B, MEMBRANE PROTEIN

ESI 9TMH 59.7 kDa 27 Arg 11 Lys

|                         |                              |                   |                        |                              |                                     |
|-------------------------|------------------------------|-------------------|------------------------|------------------------------|-------------------------------------|
| 10                      | 20                           | 30                | 40                     | 50                           | 60                                  |
| MSLATVGNL               | DSRYTMASGI                   | RRQINKVFPT        | HWSFMLGEIA             | LYSFIVLLLT                   | GVYLT <del>LF</del> FD <del>P</del> |
| 70                      | 80                           | 90                | 100                    | 110                          | 120                                 |
| SITKVIYDGG              | YLPLNGVEMS                   | RAYATALDIS        | FEVRGGLFIR             | QMHHWAALLF                   | VVSMVLVHMLR                         |
| 130                     | 140                          | 150               | 160                    | 170                          | 180                                 |
| IFFTGAFRRP              | REANWIIGVV                   | LIILGMAEGF        | MGYSLPDDLL             | SGVGLRIMSA                   | IIVGLPIIGT                          |
| 190                     | 200                          | 210               | 220                    | 230                          | 240                                 |
| WMHWLIFGGD              | FPSDLMLDRF                   | YIAHVLIIPA        | <u>ILLGLIAAHL</u>      | ALVWYQKHTQ                   | FPGAGRTENN                          |
| 250                     | 260                          | 270               | 280                    | 290                          | 300                                 |
| VIGIRIMPLF              | AVKAVAFGLI                   | VFGFLALLAG        | <u>VTTINAIWNL</u>      | <u>GPYNPSQVSA</u>            | <u>GSQPDVYMLW</u>                   |
| 310                     | 320                          | 330               | 340                    | 350                          | 360                                 |
| <u>TDGAARVMPA</u>       | <u>WELYLGN<del>Y</del>TI</u> | PAVFWVAVML        | GILVLLV <del>T</del> Y | PFIERKFTGD                   | DAHNNLLQRP                          |
| 370                     | 380                          | 390               | 400                    | 410                          | 420                                 |
| RDVPVRTSLG              | <u>VMALV<del>F</del>YILL</u> | TVSGGNDVYA        | MQFHVSLNAM             | TWIGRIGLIV                   | GPAIAYFITY                          |
| 430                     | 440                          | 450               | 460                    | 470                          | 480                                 |
| RLCIGLQ <del>R</del> SD | REVLEHGIET                   | <u>GIIKQMPNGA</u> | <u>FIEVHQPLGP</u>      | <u>VDDHGHP<del>I</del>PL</u> | <u>PYAGA<del>A</del>VPKQ</u>        |
| 490                     | 500                          | 510               | 520                    | 530                          | 540                                 |
| <u>MNQLGYAEVE</u>       | <u>TRGGFFG<del>P</del>DP</u> | <u>EDIRAKAKEI</u> | EHANHIEEAN             | TLRALNEANI                   | ERDKNEGKN                           |

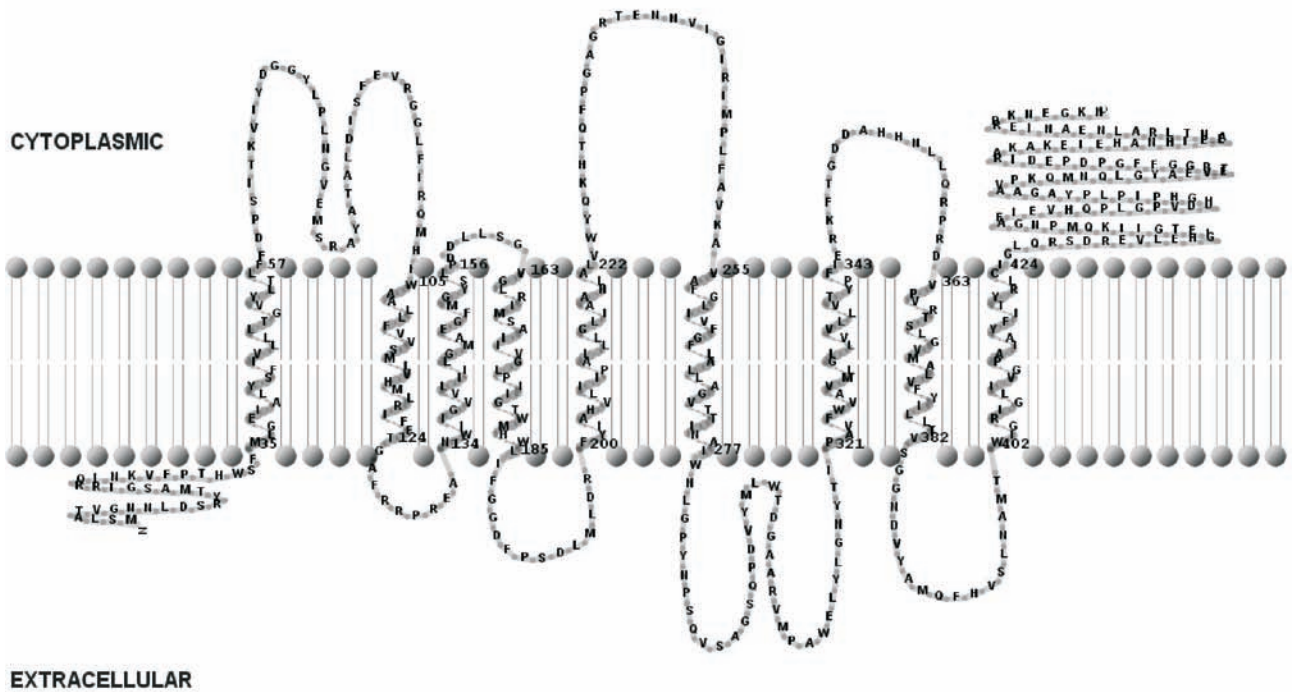

Cg1363 ATP SYNTHASE C CHAIN

ESI 2TMH 8.1 kDa 2 Arg 1 Lys

|            |            |            |            |            |            |
|------------|------------|------------|------------|------------|------------|
| 10         | 20         | 30         | 40         | 50         | 60         |
| MNEIILAQDA | TESTITGLGA | VGYGIATIGP | GLGIGILVGK | ALEGMARQPE | MAGQLRRTMF |
| 70         | 80         | 90         |            |            |            |
| LGIAFVEALA | LIGLVAGFLF |            |            |            |            |

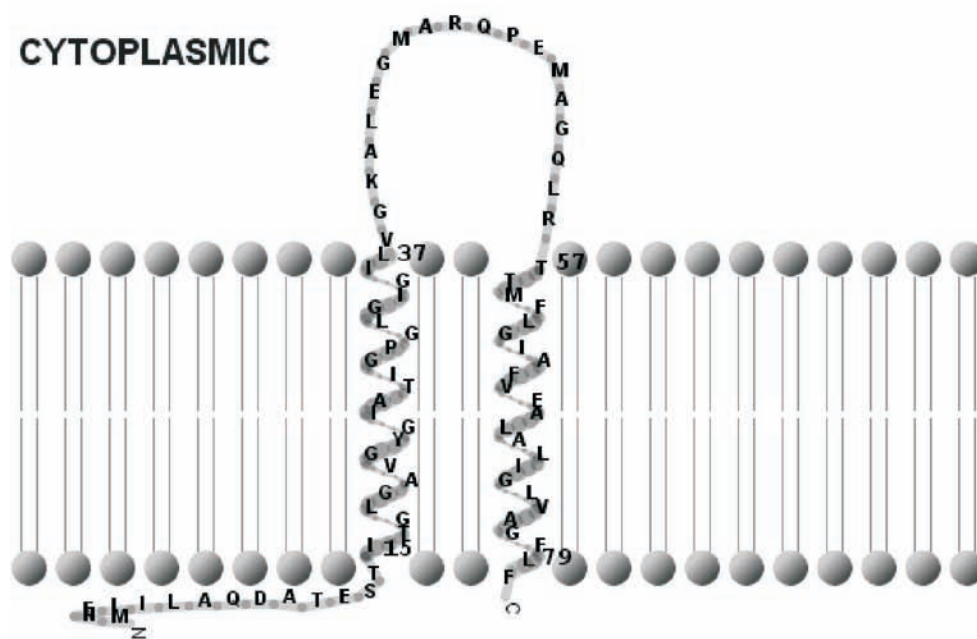

Cg0683 PERMEASE

ESI 9TMH 55.6 kDa 23 Arg 15 Lys

|            |            |            |            |            |            |
|------------|------------|------------|------------|------------|------------|
| 10         | 20         | 30         | 40         | 50         | 60         |
| MLDFLANPL  | IALVVILAVG | LAIGQIRVFG | LSLGAAAVLF | VALVVSTANT | DIVIPMIVYQ |
| 70         | 80         | 90         | 100        | 110        | 120        |
| LGLAMFVYVI | GLSAGPAFFS | EFAKKGWKL  | IFMLLLLATL | IGLAWVLIKS | LGLDAAIGTG |
| 130        | 140        | 150        | 160        | 170        | 180        |
| MFTGALTSTP | GMAAVVELIE | GIDPSLASEP | VIGYSLAYPG | AVLGSIVVAA | VGAKLLKVN  |
| 190        | 200        | 210        | 220        | 230        | 240        |
| REDARKEGMI | TAPLVWKGVQ | LKPGITGRVG | DLPRLAGESI | IATRIVDDPH | THRLADPDLP |
| 250        | 260        | 270        | 280        | 290        | 300        |
| ITEGMELLIN | GTEEAVDRAI | KALGEERETK | IEDTELIYTR | LTVSSPEVAG | RTVAELDTVA |
| 310        | 320        | 330        | 340        | 350        | 360        |
| HGFMIARIRQ | GDSEVVPKPD | TVINYSRIR  | VVVAPGRVAE | VRRFLGDSEK | SLADVNLPL  |
| 370        | 380        | 390        | 400        | 410        | 420        |
| AIGLSLGLLL | GAIPPLPGG  | TTMSLGFGGG | PIIAGLILGA | LKHTGPLTWQ | MPFHANRTIS |
| 430        | 440        | 450        | 460        | 470        | 480        |
| TLGLALFLAG | VGTSAGAGFR | AALTDSSSLI | YMAGGLVITL | ASALLCAVIG | MWVLRRLRWE |
| 490        | 500        | 510        | 520        | 530        | 540        |
| AMGVAAGTTT | NPAIISYLN  | QTGTDLANRG | YATVYPTAMI | GKILGAQILF | LLL        |

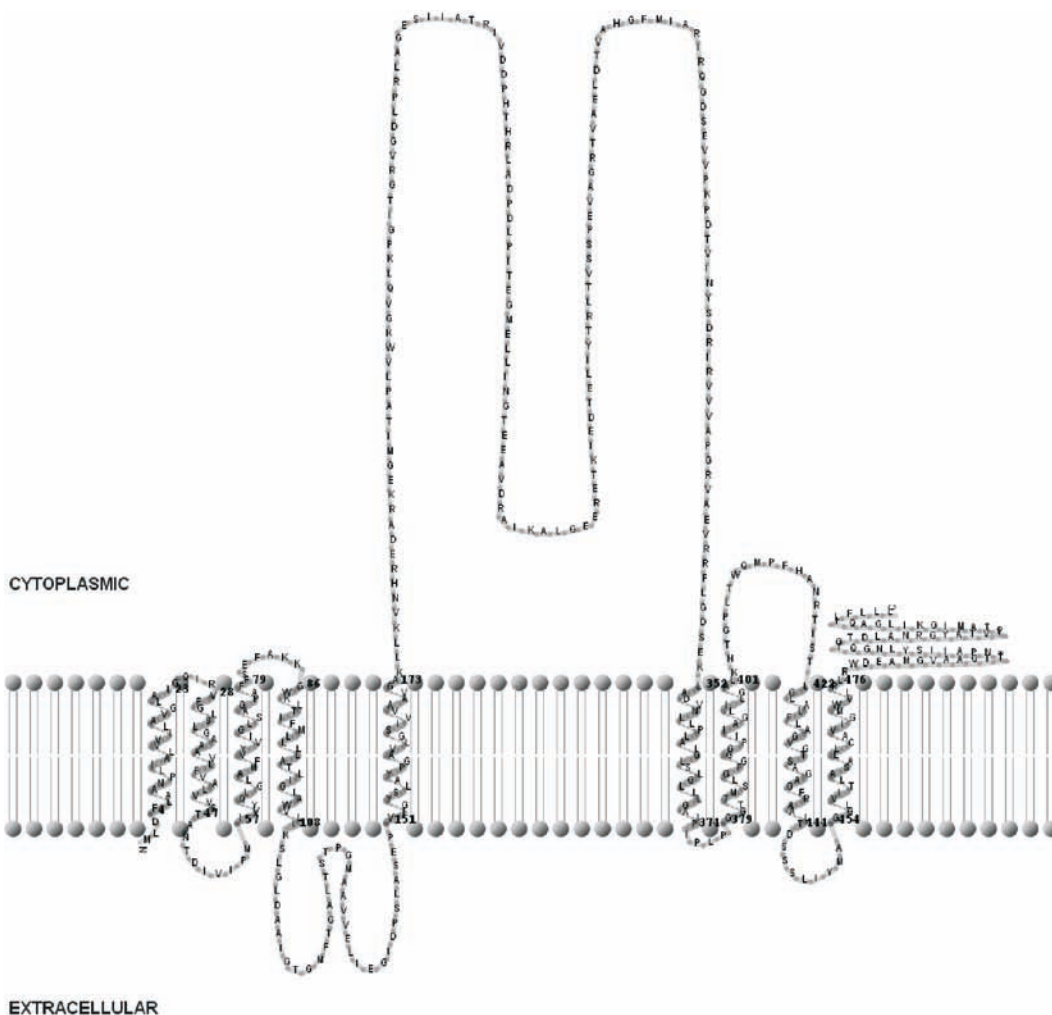

Cg0953 Na<sup>+</sup>/PROLINE, Na<sup>+</sup>/PANTOTHENATE SYMPORTER

ESI 13TMH 57.2 kDa 13 Arg 15 Lys

|            |                   |                   |                   |                   |                   |
|------------|-------------------|-------------------|-------------------|-------------------|-------------------|
| 10         | 20                | 30                | 40                | 50                | 60                |
| MNSTILLAQD | AVSEGVGNPI        | LNISVFVFI         | IVTMTVVLRV        | GKSTSESTDF        | YTGGASFSGT        |
| 70         | 80                | 90                | 100               | 110               | 120               |
| QNGLAIAQDY | LSAASFLGIV        | GAISLNGYDG        | <u>FLYSIGFFVA</u> | WLVALLLVAE        | PLRNVGRFTM        |
| 130        | 140               | 150               | 160               | 170               | 180               |
| ADVLSFRLRQ | KPVRVAAACG        | TLAVTLFYLI        | AQMAGAGSLV        | SVLLDIHEFK        | WQAVVVGIVG        |
| 190        | 200               | 210               | 220               | 230               | 240               |
| IVMIAVLLG  | GMKGTTYVQM        | IKAVLLVGGV        | AIMTVLTFVK        | VSGGLTLLN         | DAVEKHAASD        |
| 250        | 260               | 270               | 280               | 290               | 300               |
| YAATKGYDPT | <u>QILEPGLQYG</u> | <u>ATLTTQLDFI</u> | SLALALCLGT        | AGLPHVLMRF        | YTVPTAKEAR        |
| 310        | 320               | 330               | 340               | 350               | 360               |
| KSVTWAIVLI | GAFYLMTLVL        | GYGAAALVGP        | <u>DRVIAAPGAA</u> | NAAAPLLAFE        | LGGSIFMALI        |
| 370        | 380               | 390               | 400               | 410               | 420               |
| SAVAFATVLA | VVAGLAITAS        | <u>AAVGHDIYNA</u> | <u>VIRNGQSTEA</u> | <u>EQVRVSRITV</u> | VVIGLISIVL        |
| 430        | 440               | 450               | 460               | 470               | 480               |
| GILAMTQVA  | FLVALAFAVA        | <u>ASANLPTILY</u> | SLYWKKFNTT        | GAVAAIYTGL        | ISALLIFLS         |
| 490        | 500               | 510               | 520               | 530               | 540               |
| PAVSGNDSAM | <u>VPGADWAIFP</u> | <u>LKNPGLVSIP</u> | <u>LAFIAGWIGT</u> | <u>LVGKPDNMDD</u> | <u>LAAEMEVRSL</u> |
| 550        | 560               |                   |                   |                   |                   |
| TGVGVEKAVD | H                 |                   |                   |                   |                   |

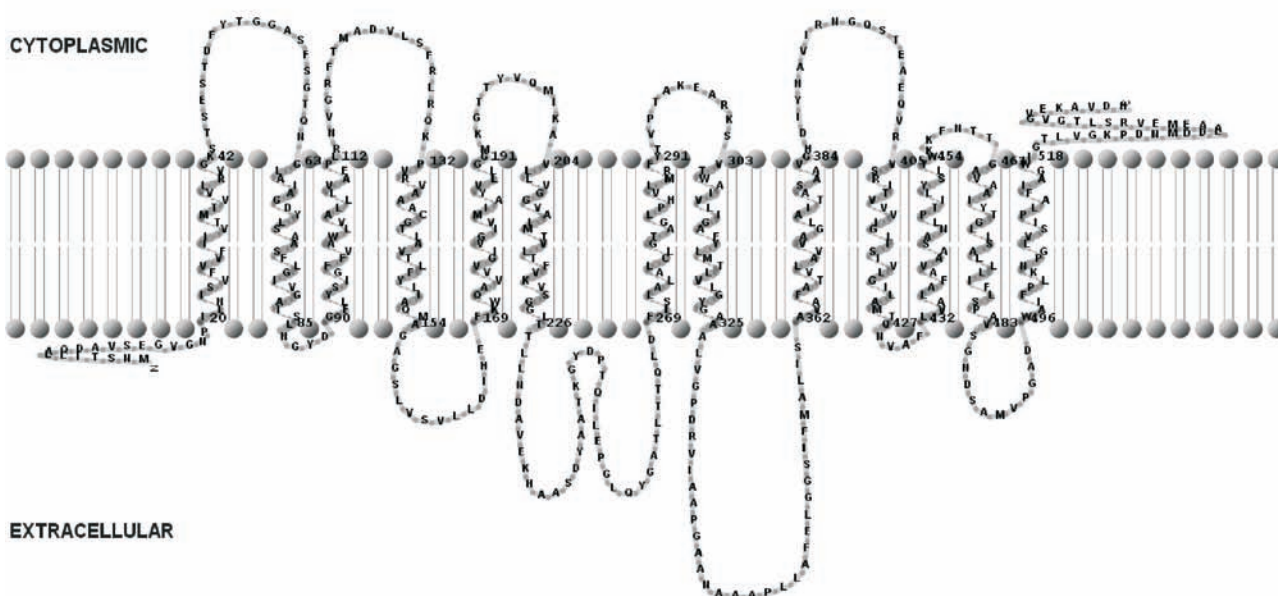

# Cg1656 NADH DEHYDROGENASE

ESI 1TMH 50.9 kDa 28 Arg 19 Lys

|                         |                        |            |                         |                         |                         |
|-------------------------|------------------------|------------|-------------------------|-------------------------|-------------------------|
| 10                      | 20                     | 30         | 40                      | 50                      | 60                      |
| MSVNPTRPEG              | GRHHVVVIGS             | GFGGLFAAKN | LAKADVDTL               | IDRTNHHLFQ              | PLLYQVATGI              |
| 70                      | 80                     | 90         | 100                     | 110                     | 120                     |
| LSSGEIAPST              | RQILGSQENV             | NVIKGEVTDI | NVESQTVTAS              | LGEFTRVFEY              | DSL <del>V</del> VGAGAG |
| 130                     | 140                    | 150        | 160                     | 170                     | 180                     |
| QSYFGNDHFA              | EFAPGMKSID             | DALEIRARII | GAFERAEICE              | DPAERERLLT              | FVVVGAGPTG              |
| 190                     | 200                    | 210        | 220                     | 230                     | 240                     |
| VELAGQLAEM              | AHRTLAGEYK             | NFNTNSAKII | LLDGAPQVLP              | PFGKRLGRNA              | QRTLEKMGVN              |
| 250                     | 260                    | 270        | 280                     | 290                     | 300                     |
| VRLNAMVTNV              | DATSVTYKTK             | DGEEHTIESF | CKIWSAGVAA              | SPLGKLVAEQ              | TGVETDRAGR              |
| 310                     | 320                    | 330        | 340                     | 350                     | 360                     |
| VMVNDDL <del>S</del> VG | DQKNV <del>F</del> VVD | MMNYNNLPGV | AQVAIQS <del>G</del> EY | VAEQIEAEVE              | GRSNTEREAF              |
| 370                     | 380                    | 390        | 400                     | 410                     | 420                     |
| DYFDKGS <del>M</del> AT | ISRFSAVVKM             | GKVEVTGFIG | WVLWLAVHIM              | FLVGF <del>R</del> NRFV | SAISWGLNAL              |
| 430                     | 440                    | 450        | 460                     | 470                     |                         |
| SRKRWNLATT              | RQQLHSRTTL             | SKFAHELEEA | SSDLPIELRD              | NQRFS <del>G</del> K    |                         |

## CYTOPLASMIC

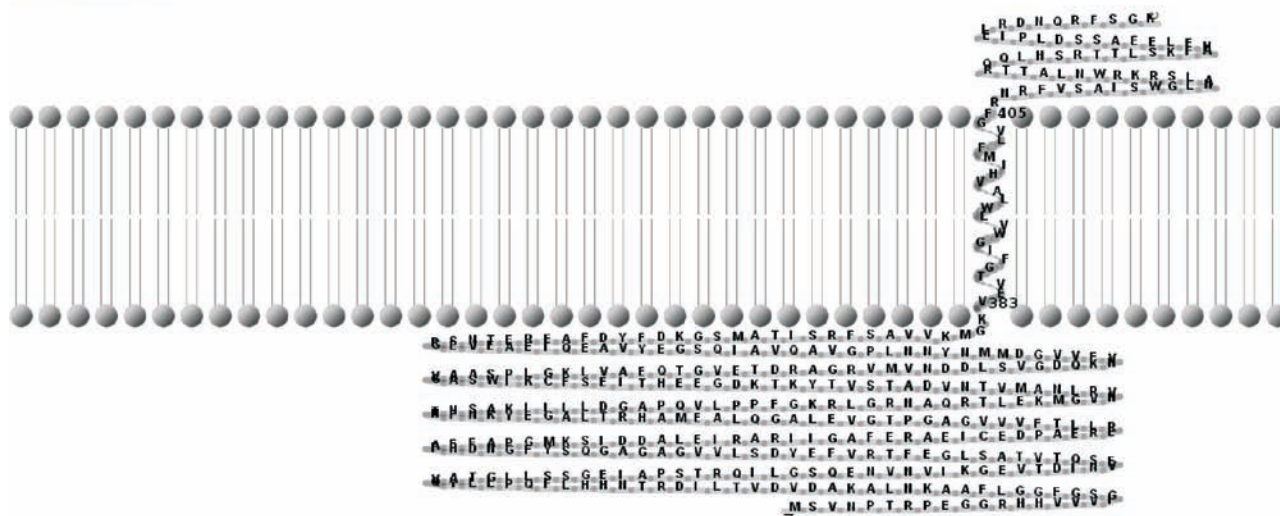

## EXTRACELLULAR

Cg3008 PORIN

ESI 1TMH 4.6 kDa 0 Arg 1 Lys

| 10          | 20          | 30          | 40          | 50     |
|-------------|-------------|-------------|-------------|--------|
| MENVYEF LGN | LDVLSG SGLI | GYVFDF LGAS | SKWAGAV ADL | I GLLG |

EXTRACELLULAR

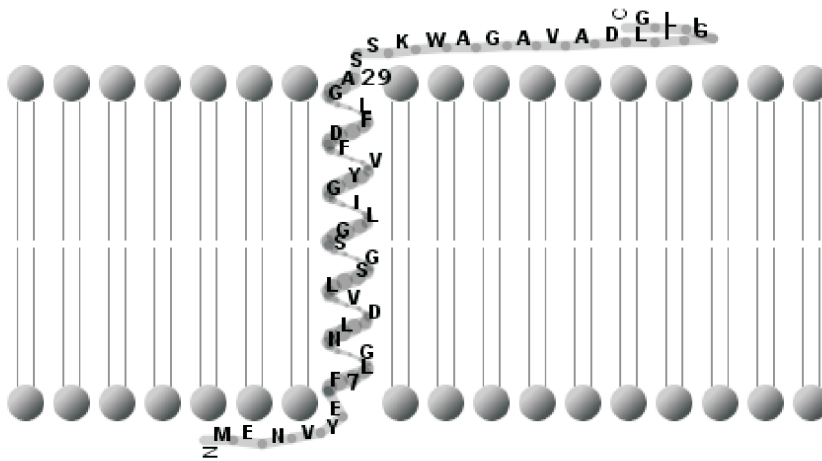

CYTOPLASMIC

Cg1603 CONSERVED MEMBRANE PROTEIN

ESI 1TMH 41.8 kDa 19 Arg 13 Lys

|                        |                         |                         |                        |                        |                        |
|------------------------|-------------------------|-------------------------|------------------------|------------------------|------------------------|
| 10                     | 20                      | 30                      | 40                     | 50                     | 60                     |
| MGCMSLFNRK             | ADLPGLQGAT              | RICTPQGKGL              | KRLSEGDLAI             | IDAPDLRSTF             | AQRLLAAKPA             |
| 70                     | 80                      | 90                      | 100                    | 110                    | 120                    |
| AVLNVS <del>RFTT</del> | GSVPNF <del>GPQM</del>  | LIDGGI <del>QLVE</del>  | GFGQELLDGT             | KDGKKGRLTE             | DGQLFYGERL             |
| 130                    | 140                     | 150                     | 160                    | 170                    | 180                    |
| ISNGSVLSGP             | AAENAFADAQ              | QSL <del>LLDRMEAY</del> | FGNTIQFIHS             | EAPLLIDGLG             | IPDTGNAIEG             |
| 190                    | 200                     | 210                     | 220                    | 230                    | 240                    |
| RKVL <del>IASPGD</del> | NHRSRLKELR              | SFIREYDPVL              | IGVDGAADTL             | VELGYKPALI             | VGNPTGIGAD             |
| 250                    | 260                     | 270                     | 280                    | 290                    | 300                    |
| ALRS <del>GANVIL</del> | PADPDGHA <del>VG</del>  | LERIQDLGIG              | AMTFPSSVNS             | STD <del>LALLLAD</del> | FHNPQMI <del>VNV</del> |
| 310                    | 320                     | 330                     | 340                    | 350                    | 360                    |
| GGPVTLDGVF             | ENREDS <del>DPAA</del>  | LLTRAKLGTK              | LVDG <del>SVIASL</del> | YTVR <del>SSSNLG</del> | WMWALLAILV             |
| 370                    | 380                     | 390                     | 400                    |                        |                        |
| VLAVVIVIA <del>G</del> | TAGSGS <del>F</del> TDN | LIDT <del>WNSFAL</del>  | TVQGWFK                |                        |                        |

EXTRACELLULAR

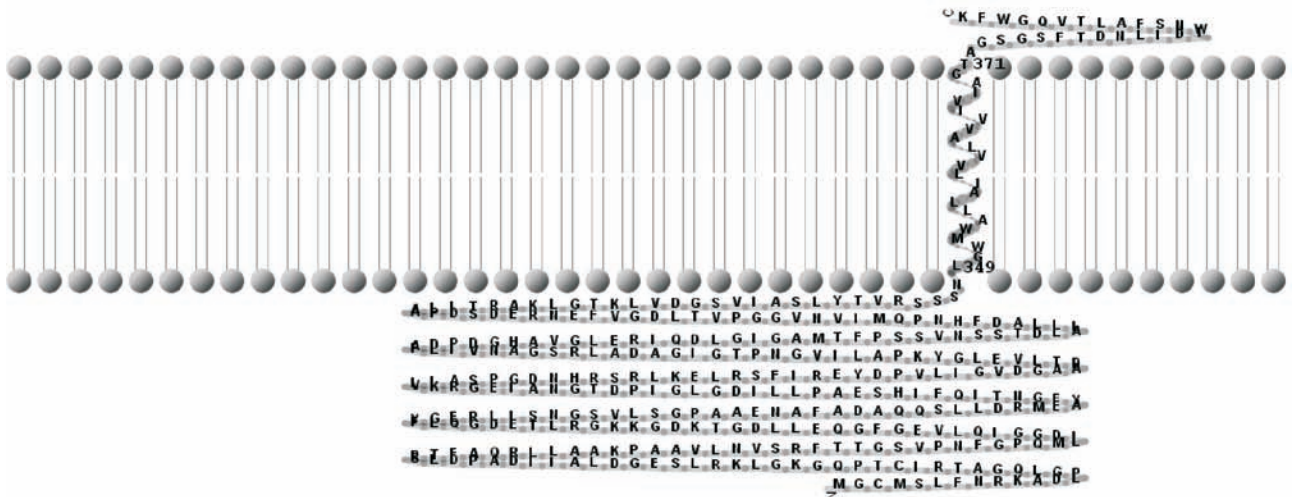

CYTOPLASMIC

Cg33365 PUTATIVE RIBITOL TRANSPORT MEMBRANE PROTEIN

ESI 13TMH 52.7 kDa 18 Arg 10 Lys

|            |             |            |             |            |             |
|------------|-------------|------------|-------------|------------|-------------|
| 10         | 20          | 30         | 40          | 50         | 60          |
| MDWLTIPFL  | VNEILAVPAF  | LIGIITAVGL | GAMGRSVGQV  | IGGAIKATLG | FLIGAGATL   |
| 70         | 80          | 90         | 100         | 110        | 120         |
| VTASLEPLGA | MIMGATMGRG  | VVPTNEAIAG | IAQAEYGAQV  | AWLMILGFAL | SLVLARFTNL  |
| 130        | 140         | 150        | 160         | 170        | 180         |
| RYVFLTGHV  | LFMSTMLTII  | LATAGFDWI  | VVGVGALLLG  | ILMVSLPAFA | HPWTRRITGD  |
| 190        | 200         | 210        | 220         | 230        | 240         |
| DSIAIGHFGT | AGYVAAGAVG  | RLVGGKGGKA | SPSTEDMKVP  | EGLRFLRDSM | VSTALSMAIM  |
| 250        | 260         | 270        | 280         | 290        | 300         |
| YIILAILFLV | RAGEEEAFTA  | FPNGATNVGN | YIMQSFTQGL  | QFGVAVAVIL | FGVRTILGEL  |
| 310        | 320         | 330        | 340         | 350        | 360         |
| VPAFQGIAAK | VVPGAIPALD  | APIVFPYAQN | AVLIGFLSSF  | VGGLVGLTVL | ASWLNPAFGV  |
| 370        | 380         | 390        | 400         | 410        | 420         |
| ALILPGLVPH | FFTGGGAAGVY | GNATGGRRGA | VFGAFANLL   | ITFLPAFLLG | VLGSFGSENT  |
| 430        | 440         | 450        | 460         | 470        | 480         |
| TFGDADFGWF | GIVVGSAAKV  | EGAGGLILL  | I IAAVLLGGA | MVFQKRVVNG | HWD PAPNRER |
| 490        | 500         | 510        | 520         |            |             |
| VEKAEADATP | TAGARTYPKI  | APPAGAPTPP | ARS         |            |             |

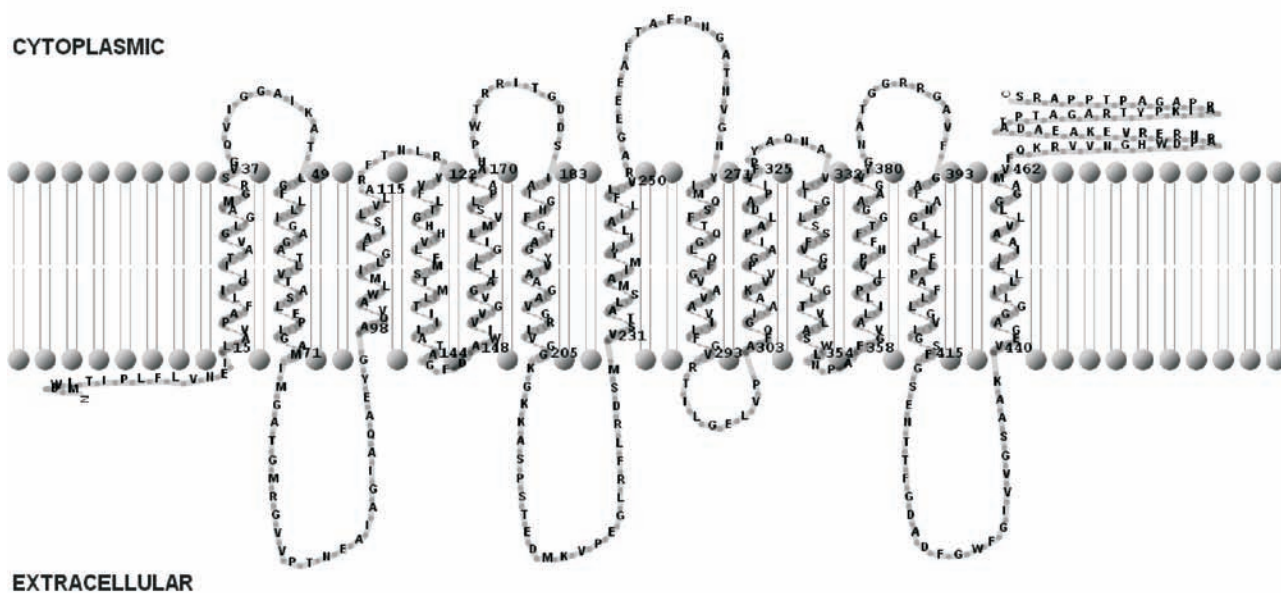



Cg1317 PROLINE TRANSPORT SYSTEM

ESI 13TMH 56.6 kDa 17 Arg 12 Lys

|                   |                   |                       |                   |                   |                   |
|-------------------|-------------------|-----------------------|-------------------|-------------------|-------------------|
| 10                | 20                | 30                    | 40                | 50                | 60                |
| MSDNTWFIIA        | IVIYMLVMVL        | IGYWSYR <del>TE</del> | <u>KYDDYMLAGR</u> | GLNPFVAAMS        | AGASDMSGWL        |
| 70                | 80                | 90                    | 100               | 110               | 120               |
| LMGLPGALFV        | TGMSELWIAV        | GLTIGAWANW            | MWVAPRLRSY        | SEISANSITL        | PSFFENRLRD        |
| 130               | 140               | 150                   | 160               | 170               | 180               |
| KSRALRIIAA        | LIIVFFTFY         | ISSGMVAGGV            | YWESTFGGDY        | LLGMAIVAGV        | TVLYTFIGGF        |
| 190               | 200               | 210                   | 220               | 230               | 240               |
| LAVSYTDAVQ        | GTIMFFSLII        | VPVMAYFALA            | <u>NPMDIWSFAN</u> | SNDYGPHTDG        | <u>IGNPTYFSMI</u> |
| 250               | 260               | 270                   | 280               | 290               | 300               |
| SGISAAAIIG        | <u>NLGWGLGYFG</u> | QPHIVRFMA             | L RTPAEAKQG       | RRIGISWMII        | CLIGATFTAI        |
| 310               | 320               | 330                   | 340               | 350               | 360               |
| ISTVFFAQNP        | DANITDTRAY        | <u>ESIFLDLARM</u>     | LFHPLIAGLI        | LTAVLAAIMS        | TMSSQLLVTA        |
| 370               | 380               | 390                   | 400               | 410               | 420               |
| <u>SSLIEDLLKV</u> | VKKDSLERT         | LIMLSRATVI            | <u>ILAIIAAAMA</u> | <u>INPSDSILGL</u> | <u>VGFAWAGFGS</u> |
| 430               | 440               | 450                   | 460               | 470               | 480               |
| AFGPILASL         | YWKRLNAAGA        | ISGMITGAIV            | SIAWGMSPLS        | DTLYEIIIPGF       | <u>ALATIVMVVV</u> |
| 490               | 500               | 510                   | 520               | 530               |                   |
| <u>SLLTKEPSEE</u> | <u>ILNEFETAKD</u> | <u>LAAAVESNED</u>     | <u>VDFADAAQKL</u> | SKES              |                   |

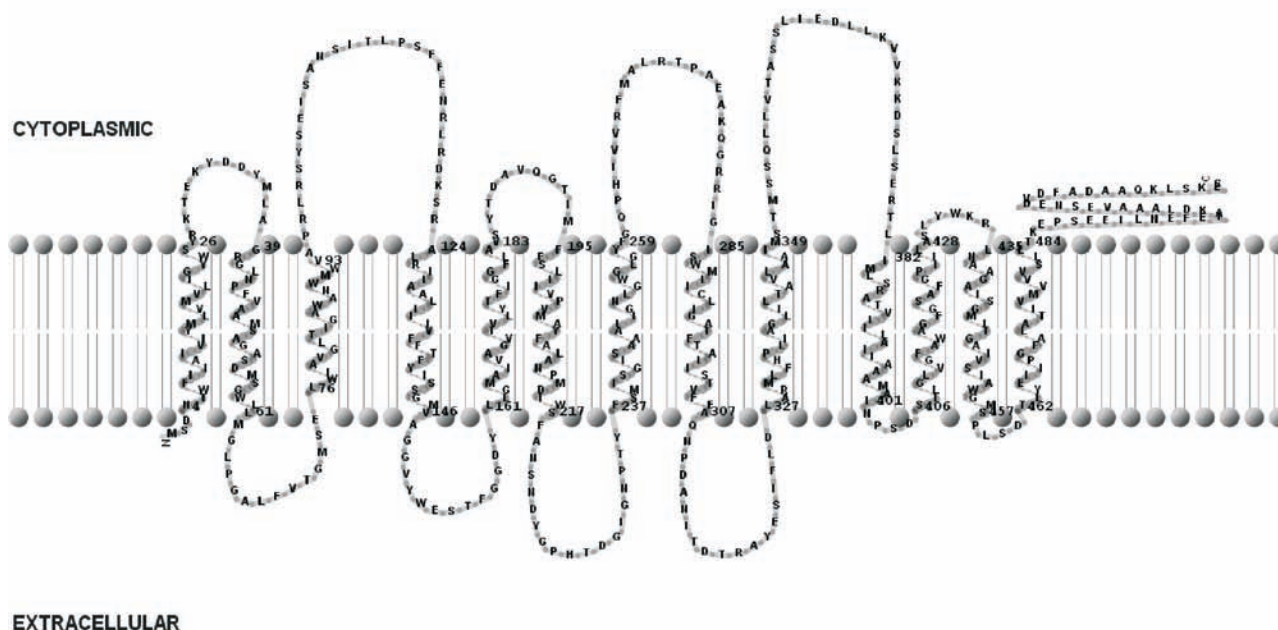

# Cg1362 ATP SYNTHASE F0 SUBUNIT 6

ESI 6TMH 36.3 kDa 19 Arg 9 Lys

|                    |                   |                   |                   |                   |                   |
|--------------------|-------------------|-------------------|-------------------|-------------------|-------------------|
| 10                 | 20                | 30                | 40                | 50                | 60                |
| MRSTSPVIVA         | LMCDGVRSDY        | SEFFRRPSHR        | AQQHFRCTAR        | TRERTLSVTT        | <u>LSMKGEFHAP</u> |
| 70                 | 80                | 90                | 100               | 110               | 120               |
| <u>DLDKEFFPGH</u>  | <u>VTDSGEVVNM</u> | <u>LFTDFANGWF</u> | AMDRIVLIRL        | LMTAVVVVFF        | LWAMRKPKLV        |
| 130                | 140               | 150               | 160               | 170               | 180               |
| <u>PHGVQNFAYEY</u> | <u>ALDFVRIHIA</u> | EDILGKKEGR        | RFLPILATIF        | FAALLMNLAT        | IIPGLNISSN        |
| 190                | 200               | 210               | 220               | 230               | 240               |
| SRIAFPIVMA         | VAGYIAFIYA        | GSKRYGFFKY        | <u>VKSSVVIPNI</u> | <u>PPALHVLVVP</u> | <u>IEFFSTFILR</u> |
| 250                | 260               | 270               | 280               | 290               | 300               |
| <u>PVTLALRLMA</u>  | NFLAGHIILV        | LLFSATNFFF        | FQFNGWTAMS        | GVTILMAVLF        | TVYEIIVIFL        |
| 310                | 320               | 330               |                   |                   |                   |
| QAYIFALLVA         | VYIELSLHAD        | SH                |                   |                   |                   |

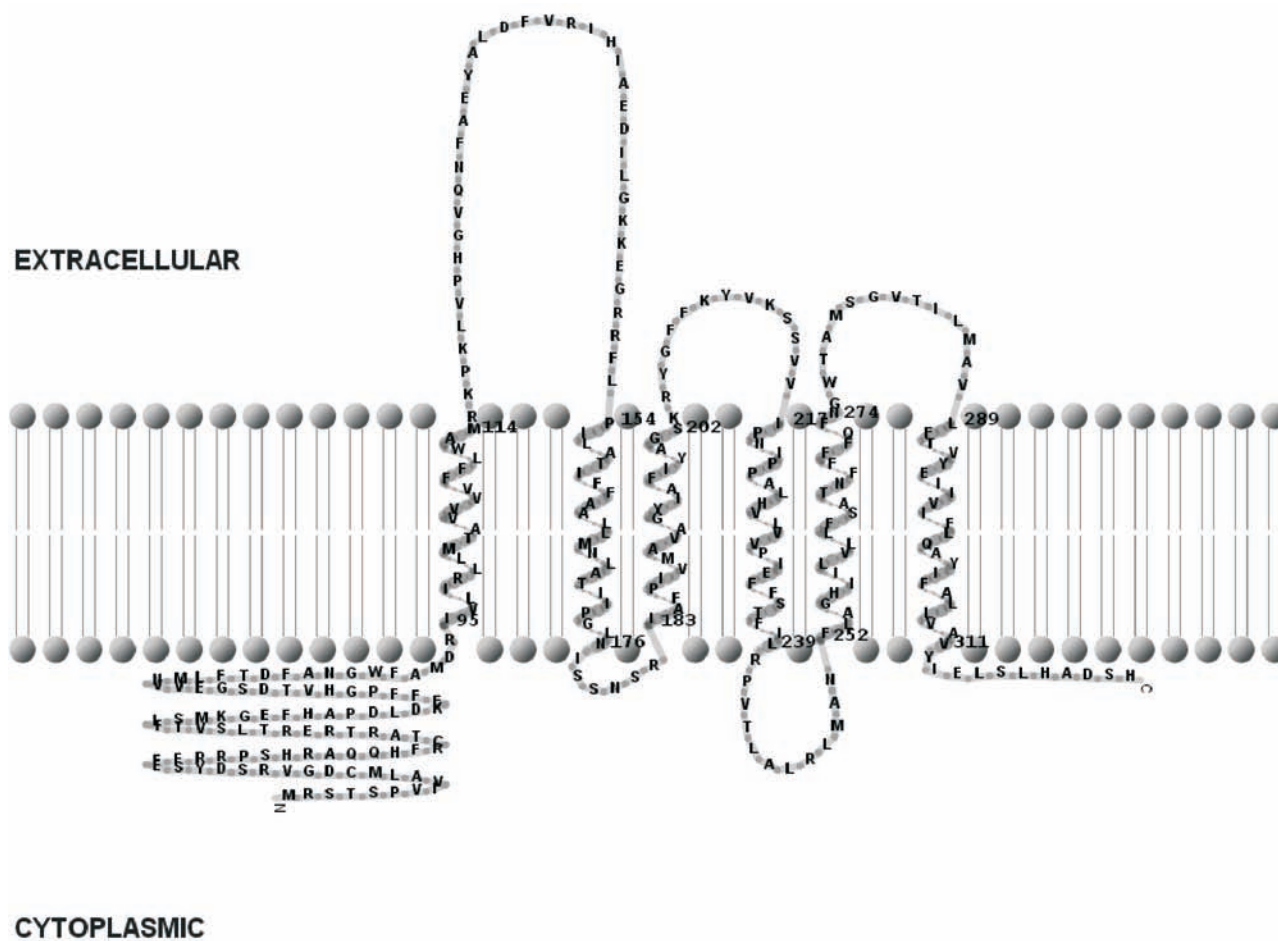

Cg0756 PUTATIVE CARBON STARVATION PROTEIN A

ESI 16TMH 81.0 kDa 29 Arg 22 Lys

|                    |                    |                     |                    |                   |                    |
|--------------------|--------------------|---------------------|--------------------|-------------------|--------------------|
| 10                 | 20                 | 30                  | 40                 | 50                | 60                 |
| MTIKQTDNIN         | DDDLVYSNAT         | DLPVGVKKSP          | KMSPTARVGL         | LVFGVIAAVG        | WGAIAFSRGE         |
| 70                 | 80                 | 90                  | 100                | 110               | 120                |
| TINSVVLVLA         | AVGSYIIAFS         | FYARLIEYKV          | VKPKDQRATP         | AEYVNDGKDY        | VPTDRRVLFG         |
| 130                | 140                | 150                 | 160                | 170               | 180                |
| HHFAAIAGAG         | PLVGPVMAAQ         | MGYLPGTLWI          | ILGVIFAGAV         | QDYLVLVWST        | RRRGRSLGQM         |
| 190                | 200                | 210                 | 220                | 230               | 240                |
| VRDEMGTVGG         | AAGILATISI         | <u>MIIII</u> IAVLAL | IVVNALADSP         | WGVFSITMTI        | PIALFMGVYL         |
| 250                | 260                | 270                 | 280                | 290               | 300                |
| RYLRPGRVTE         | VSIIGVALLL         | LAIVAGGWVA          | DTSWGVEWFT         | WSKTTLALAL        | IGYGIMAAAIL        |
| 310                | 320                | 330                 | 340                | 350               | 360                |
| PVWLLAPRD          | YLSTFMKIGV         | IGLLAVGILF          | <u>ARPEVQMP</u> SV | TSFALEGNGP        | VFSGSLFPFL         |
| 370                | 380                | 390                 | 400                | 410               | 420                |
| <u>FIT</u> IACGALS | GFHALISSGT         | TPKLVEKESQ          | MRMLGYGGML         | MESFVAMMAL        | ITAVILDRHL         |
| 430                | 440                | 450                 | 460                | 470               | 480                |
| YFSMNAPLAL         | TGGDPATAAE         | WVNSIGLTGA          | DITPEQLSEA         | AESVGESTVI        | SRTGGAPTILA        |
| 490                | 500                | 510                 | 520                | 530               | 540                |
| <u>FGMSEILSGF</u>  | <u>IGGAGMKA</u> FW | YHFAIMFEAL          | FILTTVDAGT         | RVARFMMTDT        | LGNVPGLRRF         |
| 550                | 560                | 570                 | 580                | 590               | 600                |
| KDPSWTVGNW         | ISTVFVCALW         | GAILLMGVTD          | <u>PLGGINVLFP</u>  | <u>LFGIANQLLA</u> | AIALALVLVV         |
| 610                | 620                | 630                 | 640                | 650               | 660                |
| VVKKGLYKWA         | WIPAVPLAWD         | <u>LIVTMTASWQ</u>   | <u>KIFHSDPAIG</u>  | <u>YWAQNANFRD</u> | AKSQGLTEFG         |
| 670                | 680                | 690                 | 700                | 710               | 720                |
| AAKSPEAIDA         | <u>VIRNTMIQGI</u>  | LSILFAVLVL          | VVVGAAIAVC         | IKSIRARAAG        | TPLET <u>TEEPD</u> |
| 730                | 740                | 750                 | 760                |                   |                    |
| <u>TESEFFAPTG</u>  | <u>FLASSRDKEV</u>  | <u>QAMWDERYPG</u>   | <u>GAPVSSGGH</u>   |                   |                    |

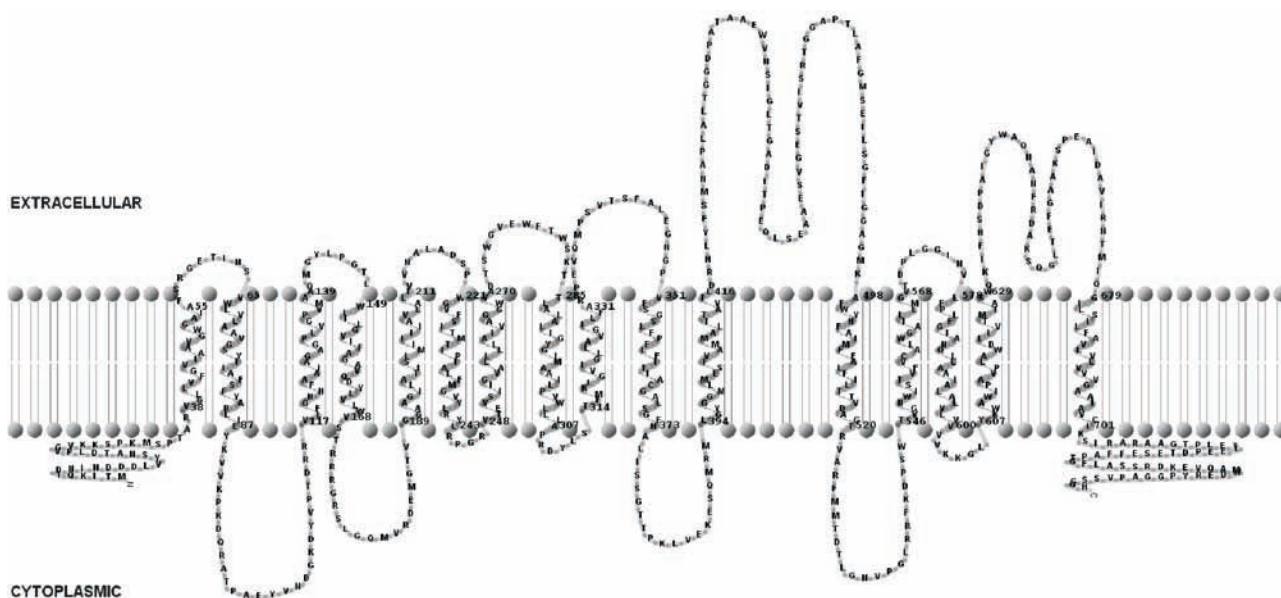

# Cg1082 PUTATIVE MEMBRANE PROTEIN

ESI 6TMH 30.1 kDa 16 Arg 5 Lys

| 10                                                     | 20                                                     | 30                                                     | 40                                                     | 50                                                     | 60                                                     |
|--------------------------------------------------------|--------------------------------------------------------|--------------------------------------------------------|--------------------------------------------------------|--------------------------------------------------------|--------------------------------------------------------|
| MTTSH <b>T</b> ARGL                                    | QHATPERR <b>R</b> KT                                   | SFFK <b>T</b> SLFKA                                    | E <b>W</b> LQFRR <b>N</b> KT                           | LLFMAT <b>V</b> FPV                                    | <u><u><u>GIPLLLFLIG</u></u></u>                        |
| 70                                                     | 80                                                     | 90                                                     | 100                                                    | 110                                                    | 120                                                    |
| <u><u><u>NGGAAESANS</u></u></u>                        | F <b>D</b> YF <b>V</b> MY <b>T</b> LL                  | F <b>V</b> Q <b>F</b> Y <b>T</b> V <b>L</b> SM         | A <b>T</b> TRRDER <b>V</b> L                           | K <b>R</b> L <b>R</b> T <b>G</b> E <b>A</b> R <b>D</b> | I <b>D</b> I <b>I</b> G <b>A</b> I <b>C</b> F <b>P</b> |
| 130                                                    | 140                                                    | 150                                                    | 160                                                    | 170                                                    | 180                                                    |
| <u><u><u>GALLTLIFTV</u></u></u>                        | <u><u><u>VIIPLLMVLG</u></u></u>                        | A <b>P</b> A <b>P</b> I <b>N</b> L <b>V</b> P <b>I</b> | <u><u><u>VFAVLIGLLL</u></u></u>                        | C <b>S</b> A <b>L</b> A <b>L</b> M <b>T</b> S <b>G</b> | F <b>T</b> R <b>N</b> A <b>E</b> A <b>A</b> Q <b>M</b> |
| 190                                                    | 200                                                    | 210                                                    | 220                                                    | 230                                                    | 240                                                    |
| T <b>S</b> M <b>P</b> V <b>F</b> M <b>L</b> A <b>M</b> | G <b>G</b> L <b>G</b> S <b>I</b> R <b>F</b> V <b>F</b> | G <b>D</b> S <b>I</b> V <b>A</b> D <b>I</b> L <b>A</b> | Y <b>T</b> P <b>F</b> A <b>A</b> I <b>S</b> D <b>L</b> | <u><u><u>VQIGWAGATF</u></u></u>                        | A <b>D</b> S <b>V</b> G <b>G</b> V <b>E</b> A <b>A</b> |
| 250                                                    | 260                                                    | 270                                                    | 280                                                    |                                                        |                                                        |
| <u><u><u>NFAGIFQDML</u></u></u>                        | <u><u><u>IPLGILAAWT</u></u></u>                        | A <b>A</b> A <b>V</b> W <b>A</b> A <b>N</b> R <b>Y</b> | M <b>R</b> W <b>D</b> S <b>Y</b> R                     |                                                        |                                                        |

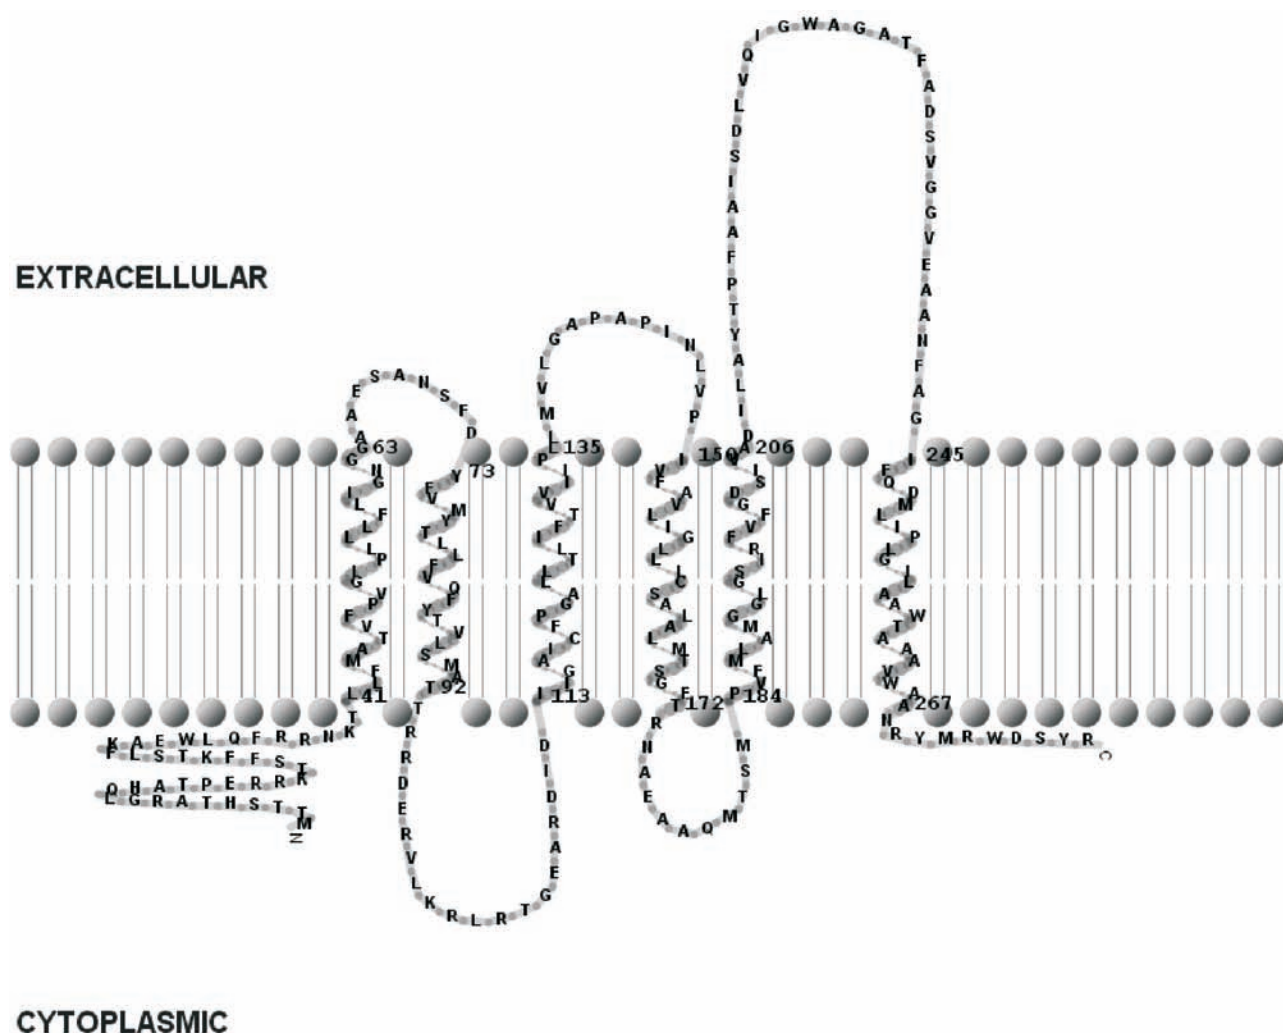

Cg0359 PUTATIVE MEMBRANE PROTEIN

ESI 2TMH 21.5 kDa 5 Arg 15 Lys

|                        |            |            |            |            |            |
|------------------------|------------|------------|------------|------------|------------|
| 10                     | 20         | 30         | 40         | 50         | 60         |
| MARLGITNAN             | FKHWRSFHVS | NKDGLFTDGN | STFAPKVDSI | PLSDVDTSVS | GEASIGTLIS |
| 70                     | 80         | 90         | 100        | 110        | 120        |
| NATSQMS <del>SLF</del> | RAEVELAKTE | LAGEAKKAAI | GGGAFSVAGV | IALLYSSFFF | FFVAALLSEW |
| 130                    | 140        | 150        | 160        | 170        | 180        |
| IKPWAAFLIV             | FLFMLVIAAA | LALFGWRKVK | KMGAPKNTIQ | SVNQLKNLVP | GQASEKLEKA |
| 190                    | 200        | 210        |            |            |            |
| NKRGLYTSAS             | FHSPGAITGD | H          |            |            |            |

EXTRACELLULAR

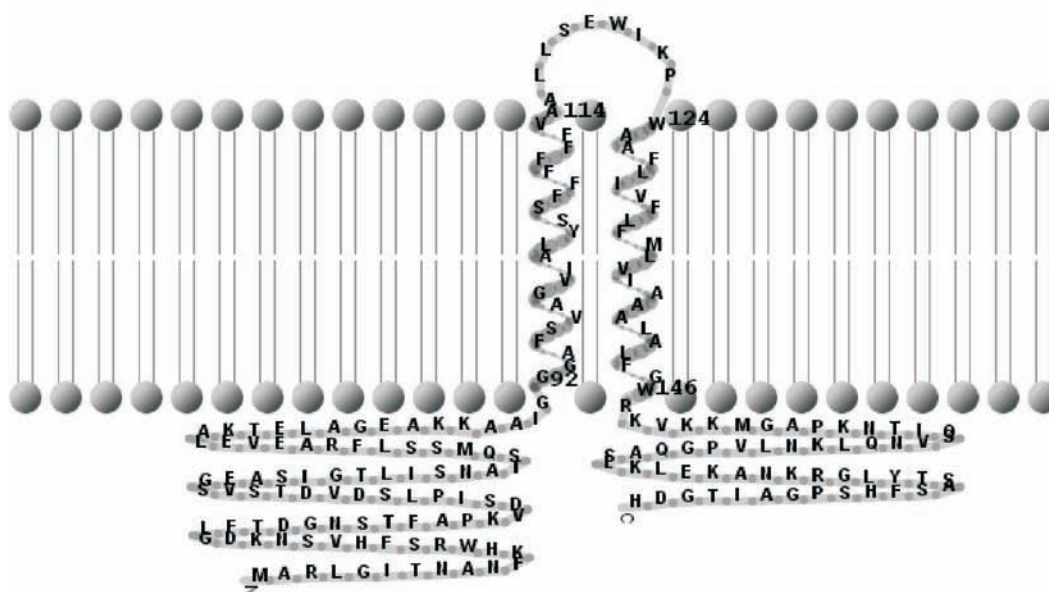

CYTOPLASMIC

# Cg2810 Na<sup>+</sup>/H<sup>+</sup>-DICARBOXYLATE SYMPORTER

ESI 10TMH 47.9 kDa 12 Arg 14 Lys

|                         |            |            |             |             |            |
|-------------------------|------------|------------|-------------|-------------|------------|
| 10                      | 20         | 30         | 40          | 50          | 60         |
| MLPMANATAQ              | KGRFGLPGWM | TGFGAQVIAG | LILGLLILGLV | ARGMDSGAAD  | GEASWLTGLL |
| 70                      | 80         | 90         | 100         | 110         | 120        |
| SGVGSAYVSL              | LKVMVPPLVF | AAVVTSVAKL | REVANAARLA  | VSTLWVFAIT  | AFFSVLAGIA |
| 130                     | 140        | 150        | 160         | 170         | 180        |
| VALIMQPGVG              | STVDASNAAD | PSRVGSWLGF | IQSVIPSNIL  | GLSGSYSSENS | GVNLSFNVLQ |
| 190                     | 200        | 210        | 220         | 230         | 240        |
| ILVISIAIGV              | AALKAGKSAE | PFLKFTESFL | KIIQIVLWVI  | IRLAPIGSAA  | LIGNAVATYG |
| 250                     | 260        | 270        | 280         | 290         | 300        |
| WSALGSLGKF              | VLAIYVGLAI | VMFVIYPVVL | KLNGIPVLGF  | FKRVWPVTSL  | GFVTRSSMGV |
| 310                     | 320        | 330        | 340         | 350         | 360        |
| MPVTQRVTEQ              | SLGVPSAYAS | FAIPLGATSK | MDGCAAVYPA  | VAAIFVAQFY  | GIDLSIMDYV |
| 370                     | 380        | 390        | 400         | 410         | 420        |
| LIMIVSVLGS              | AATAGTTGAT | VMLTTLTSTL | GLPLAGVGLL  | LAIEPIIDMG  | RTATNVTGQA |
| 430                     | 440        | 450        | 460         | 470         |            |
| LVP <del>AI</del> VAKRE | GILDQDVWDA | AEKGGAAIEM | ATVSEKETEP  | AEVRS       |            |

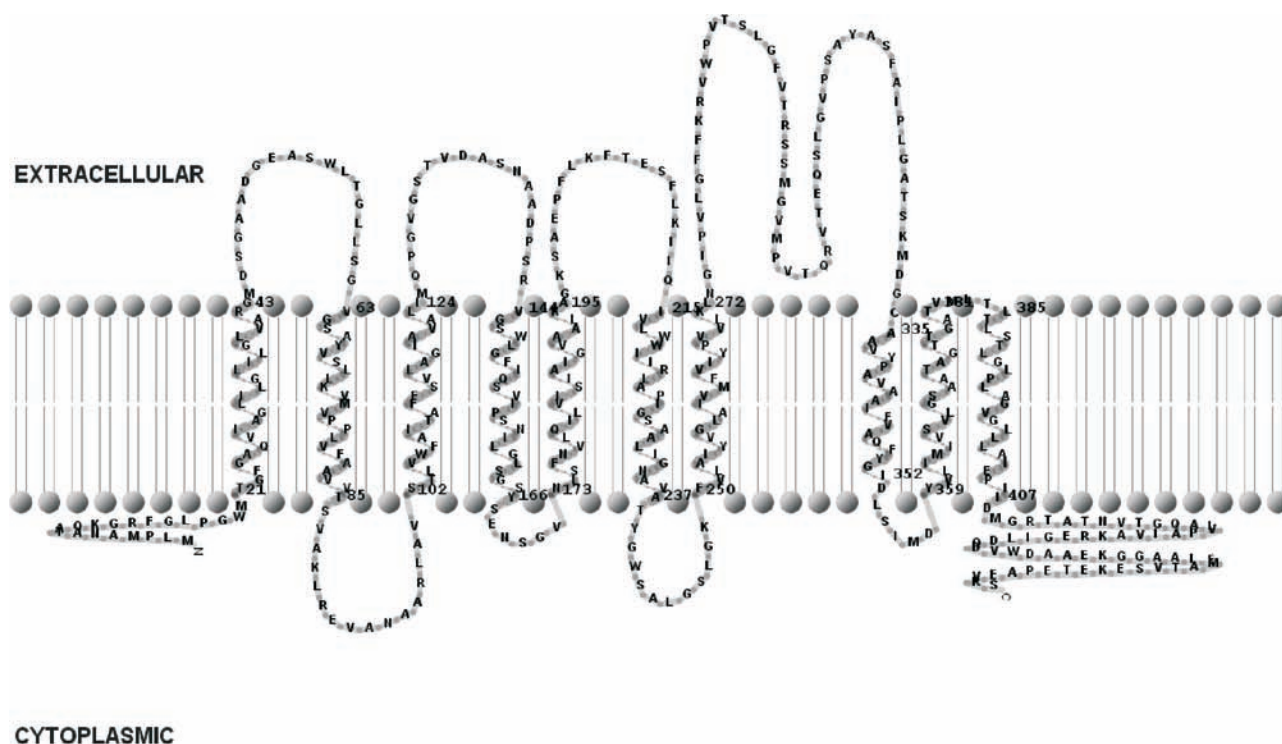

Cg2195 PUTATIVE SECRETED OR MEMBRANE PROTEIN

ESI 2TMH 11.8 kDa 3 Arg 2 Lys

|            |            |            |            |            |            |
|------------|------------|------------|------------|------------|------------|
| 10         | 20         | 30         | 40         | 50         | 60         |
| MRSFRTAAVA | GLTAVALSVG | SATVATAEES | DQNLSSGFSA | LSSGGAAAVG | EDWDADQPVT |
| 70         | 80         | 90         | 100        | 110        | 120        |
| GEDIFGEEHE | RDNENTPAWA | KNMYDLTVLG | GIASLLGVIV | FPAYNYLVYT | GVIKG      |

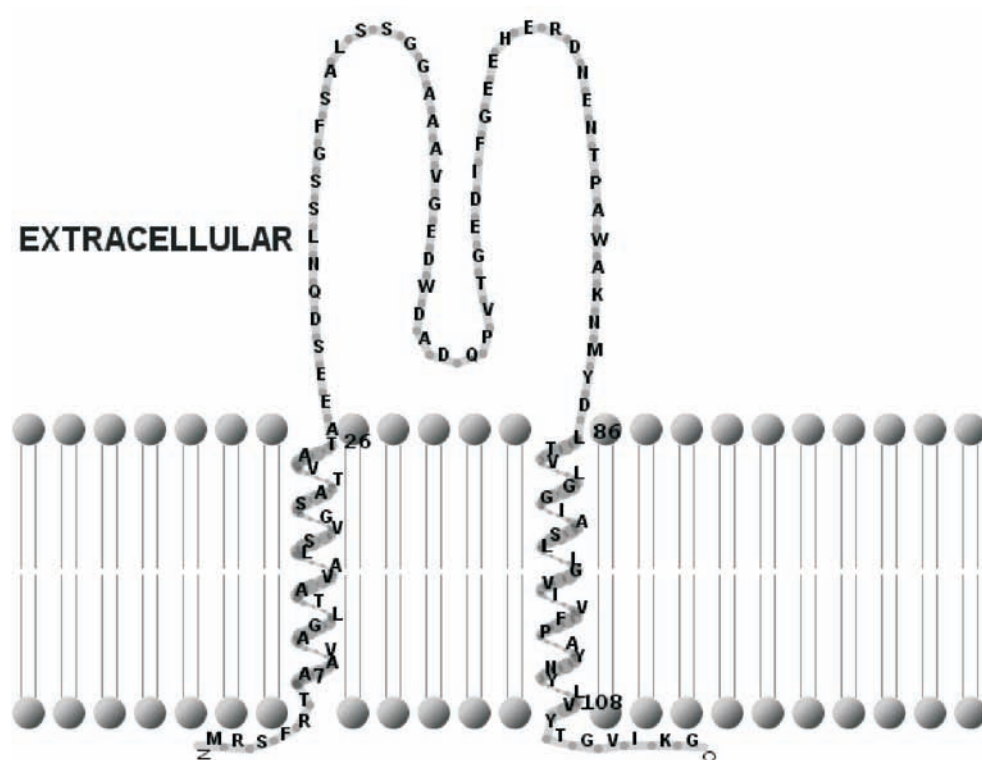

CYTOPLASMIC

# Cg3368 ABC-TRANSPORTER PERMEASE PROTEIN

ESI 12TMH 57.1 kDa 28 Arg 4 Lys

|             |             |            |            |             |            |
|-------------|-------------|------------|------------|-------------|------------|
| 10          | 20          | 30         | 40         | 50          | 60         |
| MIRLNLRRLRR | MLILWLLGI   | WVFLIITPPS | YVATYPDLAS | RGPVVSSVQN  | NVGTQAMYGY |
| 70          | 80          | 90         | 100        | 110         | 120        |
| LPSPGTIGQL  | TAWETGAWLC  | VLSSVMVLL  | FSSLHRKPES | SGLVEYVYAA  | GRSGSSRFGA |
| 130         | 140         | 150        | 160        | 170         | 180        |
| AIATGTIVSV  | LNGAVCAFIL  | LAFRYLSIDE | ITVAGSIAFG | VTITLTMLAT  | MAITSILQSL |
| 190         | 200         | 210        | 220        | 230         | 240        |
| WGRGTNFNRL  | GLLSVGA AFL | IRMFADTSSS | SWATHLNWVS | PQGWRTVIAP  | FTEDSWLKAL |
| 250         | 260         | 270        | 280        | 290         | 300        |
| VLAIVCAALI  | GVAFTLDSRR  | PFDESLHLR  | GSKRYRERKI | RSLYSLNMVL  | HRGNLITWSI |
| 310         | 320         | 330        | 340        | 350         | 360        |
| VIGLVLLIFL  | PLIDSLPSL   | QGDAATMQAV | EAFLPAGELQ | ITFIVYVFQI  | ASILLSIAVV |
| 370         | 380         | 390        | 400        | 410         | 420        |
| LPVIGFIGQE  | REGLIDAVRS  | TGVRWSPLW  | GCVQACLSTL | TSC TIFAILC | ALLGLYLQPS |
| 430         | 440         | 450        | 460        | 470         | 480        |
| TVEDGTSLMV  | LSGLSIAVHA  | LFFLGIAIAV | AGLAPRVIHL | AWLP IIAASV | VTLLGPLFSL |
| 490         | 500         | 510        | 520        | 530         |            |
| TEQQMEFSPL  | THSWANSDEA  | VWPLLTFAII | GVALGGVGLL | GAQRNLL     |            |

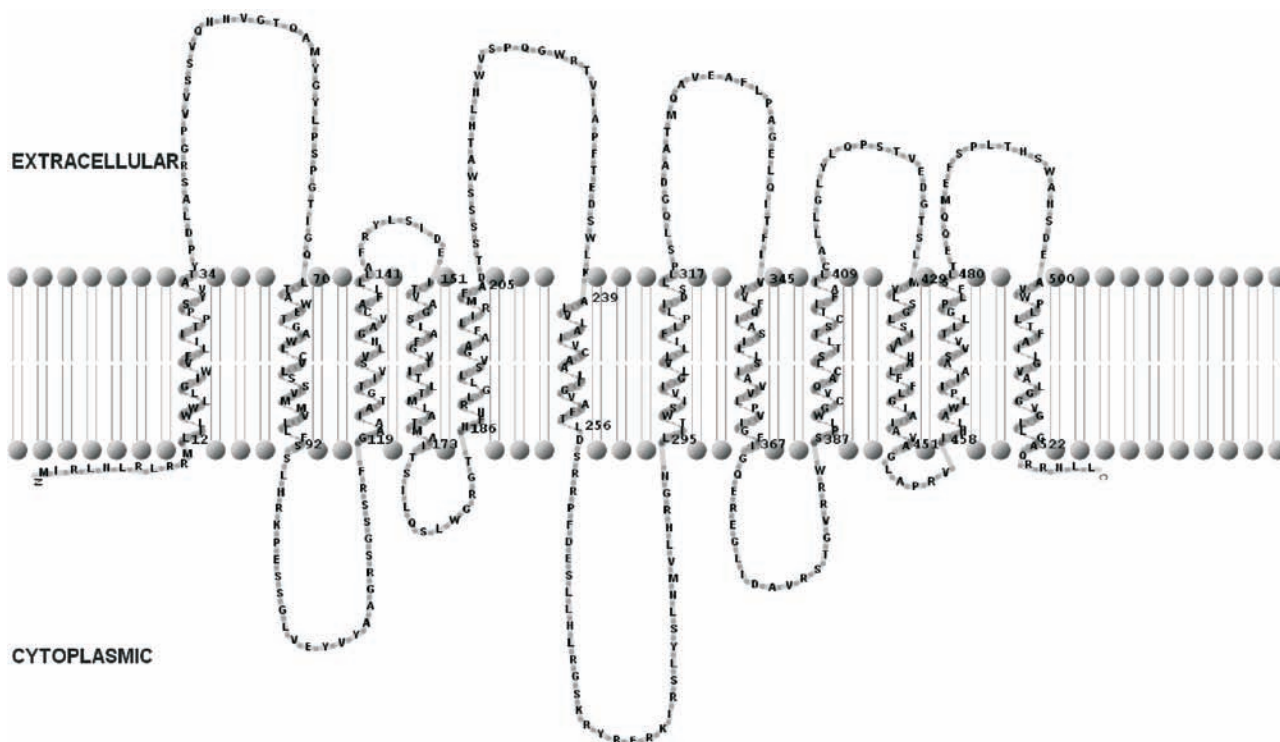



Cg0445 SUCCINATE DEHYDROGENASE CD

ESI 5TMH 28.3 kDa 16 Arg 4 Lys

|                   |                   |                   |            |            |                   |
|-------------------|-------------------|-------------------|------------|------------|-------------------|
| 10                | 20                | 30                | 40         | 50         | 60                |
| MTVRNPDREA        | IRHGKITTEA        | LRERPAPYPTW       | AMKLTMAITG | LMFGGFVLVH | MIGNLKIFMP        |
| 70                | 80                | 90                | 100        | 110        | 120               |
| DYAADSAHPG        | <u>EAQVDVYGEF</u> | <u>LREIGSPILP</u> | HGSVLWILRI | ILLVALVLHI | YCAFALTGRS        |
| 130               | 140               | 150               | 160        | 170        | 180               |
| HQSRGKFRRT        | NLVGGFNSFA        | TRSMMLVTGIV       | LLAFIIFHIL | DLTMGVAPAA | <u>PTSFEHGEVY</u> |
| 190               | 200               | 210               | 220        | 230        | 240               |
| <u>ANMVASFSRW</u> | <u>PVAIWYIIAN</u> | LVLVHLSHG         | IWLAVSDLGI | TGRRWRAILL | <u>AVAYIVPALV</u> |
| 250               | 260               |                   |            |            |                   |
| <u>LIGNITIPFA</u> | <u>IAVGWIA</u>    |                   |            |            |                   |

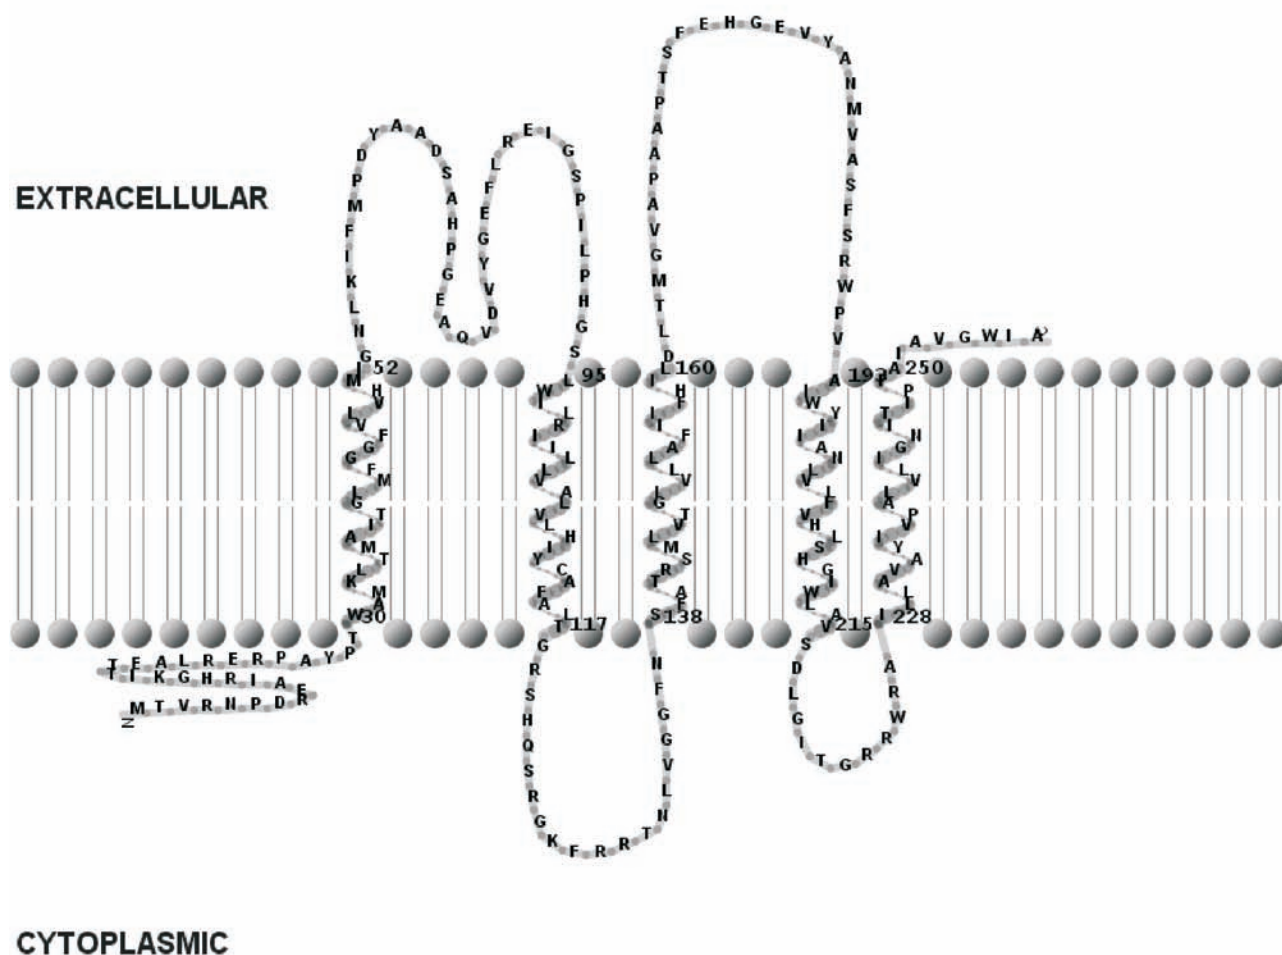

Cg2845 ABC-TYPE PHOSPHATE TRANSPORT SYSTEM, PERMEASE COMPONENT

ESI 6TMH 37.5 kDa 16 Arg 9 Lys

|            |                   |            |            |                   |                   |
|------------|-------------------|------------|------------|-------------------|-------------------|
| 10         | 20                | 30         | 40         | 50                | 60                |
| MATNESVSEK | <u>QRLDATRVQA</u> | HPVAVNANSS | QTKPSKKIVA | EGGGSVKRPG        | DRIFEVLSTA        |
| 70         | 80                | 90         | 100        | 110               | 120               |
| SAAIITAIII | AIAAFLIWRA        | VPALMRNAEG | IGGFFTYSGA | WNTTIDIDAMY       | <u>FGIPNLLAAT</u> |
| 130        | 140               | 150        | 160        | 170               | 180               |
| LLISVIALII | AMPIALGIAI        | FLSNYSPKRL | VKPLGYMVDM | LAAVPSIVYG        | LWGWQVLGPA        |
| 190        | 200               | 210        | 220        | 230               | 240               |
| LSGFYTWIES | WGSFFLFAT         | YQNSPSFATG | RNMLTGGIVL | <u>AVMILPVIAA</u> | TAREVFIQTP        |
| 250        | 260               | 270        | 280        | 290               | 300               |
| KGHIESALAL | GATRWEVVRL        | TVLPFGMSGY | VSGAMLGLGR | <u>ALGETMALYM</u> | VVSPSSAFRF        |
| 310        | 320               | 330        | 340        | 350               | 360               |
| SLFDGGTTFA | TAIANAPEF         | NDNTRAGAYI | SAGLVLFALT | FIVNAGARAM        | VNRGK             |

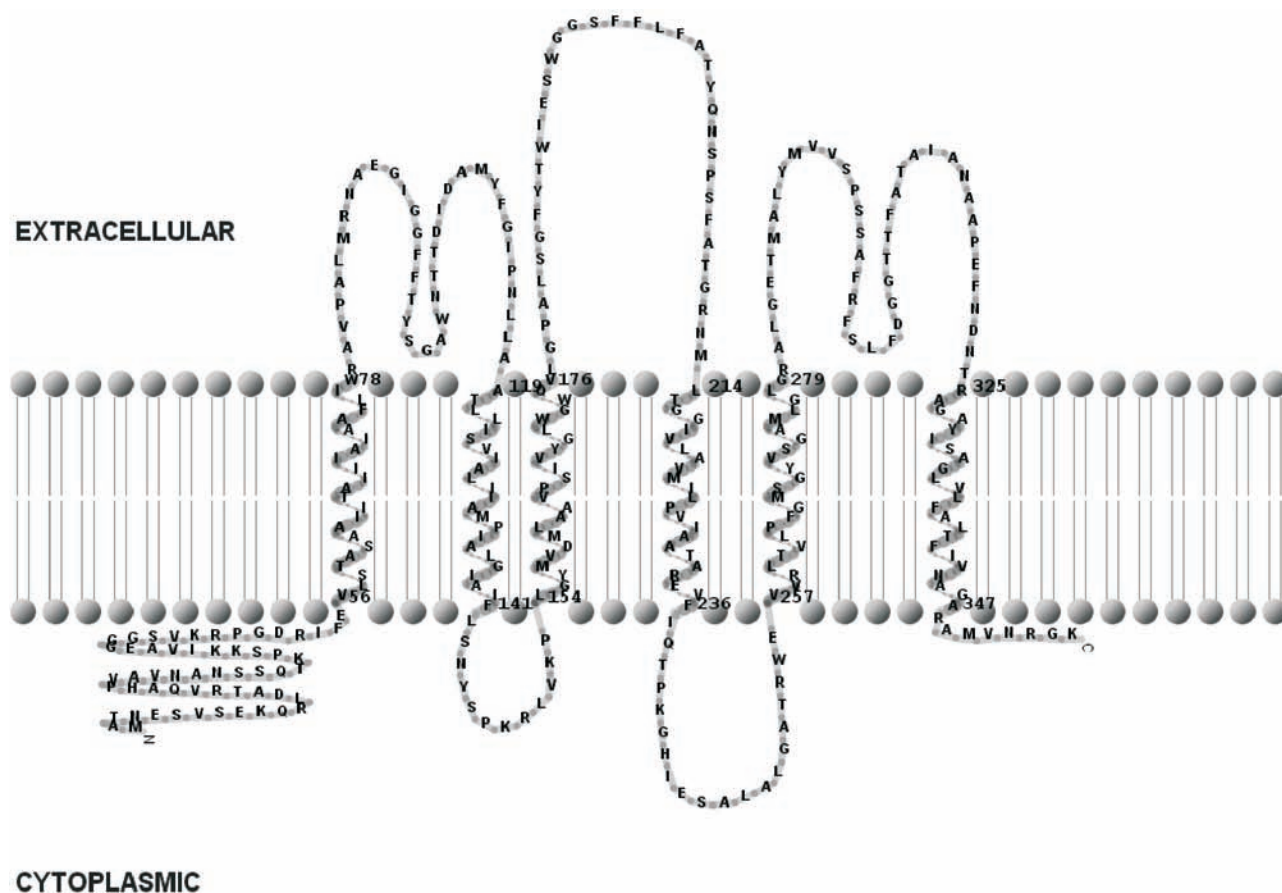

Cg2704 ABC-TYPE SUGAR TRANSPORT SYSTEM, PERMEASE COMPONENT

ESI 6TMH 31.5 kDa 8 Arg 11 Lys

|                   |                   |                    |                   |                   |                    |
|-------------------|-------------------|--------------------|-------------------|-------------------|--------------------|
| 10                | 20                | 30                 | 40                | 50                | 60                 |
| <u>MQATLKKYFP</u> | <u>VFVLPTLLAF</u> | <u>MIAFLVPPFIV</u> | <u>GFFLSFTKFT</u> | <u>TITNAKWVGI</u> | <u>DNYVKAFSQR</u>  |
| 70                | 80                | 90                 | 100               | 110               | 120                |
| <u>EGFISAFGFT</u> | <u>VLVVIVSVIT</u> | <u>VNIFAFLLAW</u>  | <u>LLTRKLRGTN</u> | <u>FFRTVFFMPN</u> | <u>LIGGIVLGYT</u>  |
| 130               | 140               | 150                | 160               | 170               | 180                |
| <u>WQTMINAVLS</u> | <u>HYATTISADW</u> | <u>KFGYAGLIML</u>  | <u>LNWQLIGYMM</u> | <u>IIYIAGLQNV</u> | <u>PPELIEAAEL</u>  |
| 190               | 200               | 210                | 220               | 230               | 240                |
| <u>DGVNKWEMLR</u> | <u>HVTIPMVMP</u>  | <u>ITICLFLTLS</u>  | <u>NSFKLFDQNL</u> | <u>ALTNGAPGGQ</u> | <u>TEMVVALNIIN</u> |
| 250               | 260               | 270                | 280               | 290               |                    |
| <u>TLFNRMNVEG</u> | <u>VGQAKAVIFV</u> | <u>VVVVVIAYFQ</u>  | <u>LRATRSKEIE</u> | <u>A</u>          |                    |

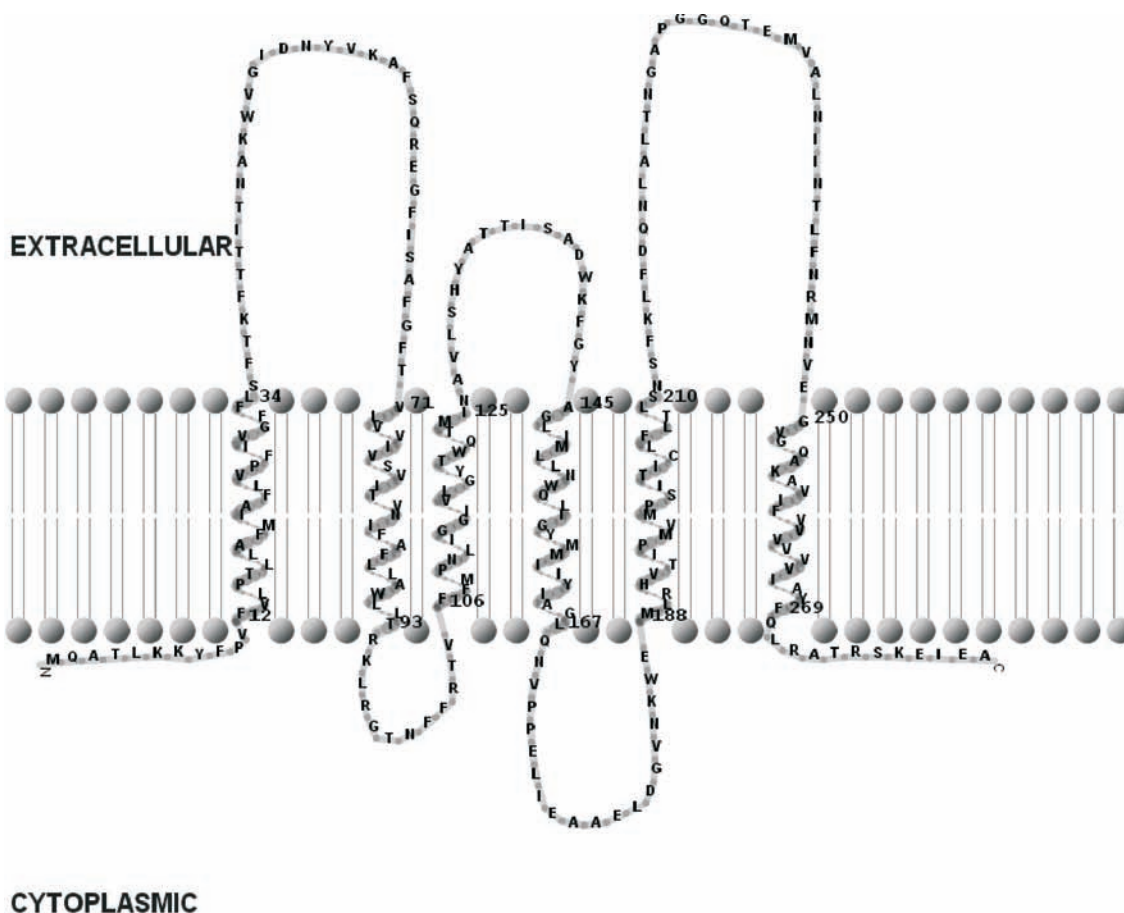

Cg1537 GLUCOSE-SPECIFIC ENZYME II BC COMPONENT OF PTS

MALDI 10TMH 72.5 kDa 18 Arg 29 Lys

|            |            |            |            |             |            |
|------------|------------|------------|------------|-------------|------------|
| 10         | 20         | 30         | 40         | 50          | 60         |
| MASKLTTTSQ | HILENLGGPD | NITSMTHCAT | RLRFQVKDQS | IVDQQEIDSD  | PSVLGVVPQG |
| 70         | 80         | 90         | 100        | 110         | 120        |
| STGMQVVMGG | SVANYYQEIL | KLDGMKHFAD | GEATESSSKK | EYGGVVRGKYS | WIDYAFEFLS |
| 130        | 140        | 150        | 160        | 170         | 180        |
| DTRFPILWAL | LGASLIITLL | VLADTFGLQD | FRAPMDEQPD | TYVFLHSMWR  | SVFYFLPIMV |
| 190        | 200        | 210        | 220        | 230         | 240        |
| GATAARKLGA | NEWIGAAIPA | ALLTPEFLAL | GSAGDTVTVF | GLPMVLNDYS  | GQVFPPLIAA |
| 250        | 260        | 270        | 280        | 290         | 300        |
| IGLYWVEKGL | KKIPEAVQM  | VFVPPFSLLI | MIPATAFLLG | PFGIGVNGI   | SNLLEAINNF |
| 310        | 320        | 330        | 340        | 350         | 360        |
| SPFILSIVIP | LLYPFLVPLG | LHWPLNAIMI | QNINTLGYDF | IQGPMGAWNF  | ACFGLVTGVF |
| 370        | 380        | 390        | 400        | 410         | 420        |
| LLSIKERNKA | MRQVSLGGML | AGLLGGISEP | SLYGVLLRFK | KTYFRLLPGC  | LAGGIVMGIF |
| 430        | 440        | 450        | 460        | 470         | 480        |
| DIKAYAFVFT | SLLTIPAMDP | WLGYTIGIAV | AFFVSMFLVL | ALDYRSNEER  | DEARAKVAAD |
| 490        | 500        | 510        | 520        | 530         | 540        |
| KQAEEDLKA  | ANATPAAPVA | AAGAGAGAGA | GAAAGAATAV | AAKPKLAAGE  | VVDIVSPLEG |
| 550        | 560        | 570        | 580        | 590         | 600        |
| KAIPLSEVPD | PIFAAGKLG  | GIAIQPTGNT | VVAPADATVI | LVQKSGHAVA  | LRLDSGVEIL |
| 610        | 620        | 630        | 640        | 650         | 660        |
| VHVGLDTVQL | GEGFTVHVE  | RRQQVKAGDP | LITFDADFIR | SKDLPLITPV  | VVSNAAKFGE |
| 670        | 680        | 690        |            |             |            |
| IEGIPADQAN | SSTTVIKVNG | KNE        |            |             |            |

EXTRACELLULAR

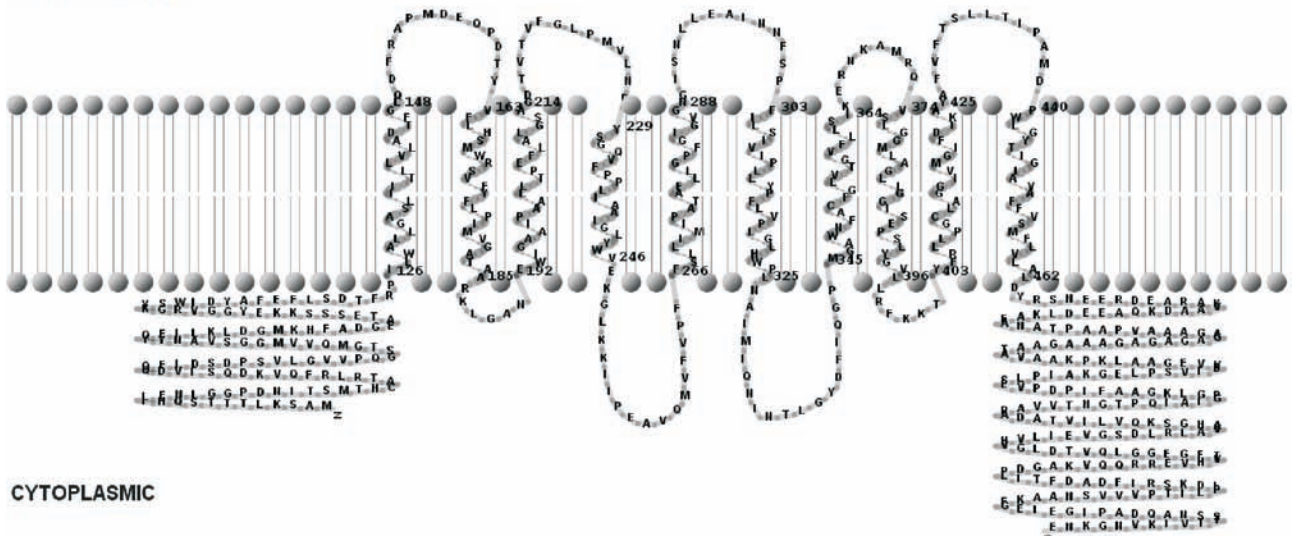

Cg2409 CYTOCHROME C OXIDASE CHAIN II

MALDI 3TMH 39.6 kDa 15 Arg 14 Lys

|            |            |            |            |            |            |
|------------|------------|------------|------------|------------|------------|
| 10         | 20         | 30         | 40         | 50         | 60         |
| MEQQNKRGLK | RKALLGGVLG | LGGLAMAGCE | VAPPGGVLGD | FLRMGWPDGI | TPEAVAMGNF |
| 70         | 80         | 90         | 100        | 110        | 120        |
| WSVWVAAWI  | IGIIMWGLFL | TAIFAWGAKR | AEKRGEGEFP | KQLQYNVPLE | LVLTIVPIII |
| 130        | 140        | 150        | 160        | 170        | 180        |
| VMVLFFFTQ  | TQDKVTALDK | NPEVTVDVTA | YQWNWKFQYS | EIDGSLAPGG | QDYQGSPPER |
| 190        | 200        | 210        | 220        | 230        | 240        |
| QAAAEASKKD | PSGDNPIHGN | SKSDVSYLEF | NRIETLGTDD | EIPVMVLPVN | TPIEFNLASA |
| 250        | 260        | 270        | 280        | 290        | 300        |
| DVAHSFWVPE | FLFKRDAYAH | PEANKSQRVF | QIEEITEEGA | FVGRCAEMCG | TYHAMMNFEL |
| 310        | 320        | 330        | 340        | 350        | 360        |
| RVVDRDSFAE | YISFRDSNPD | ATNAQALEHI | GQAPYATSTS | PFVSDRTATR | DGENTQSNAA |

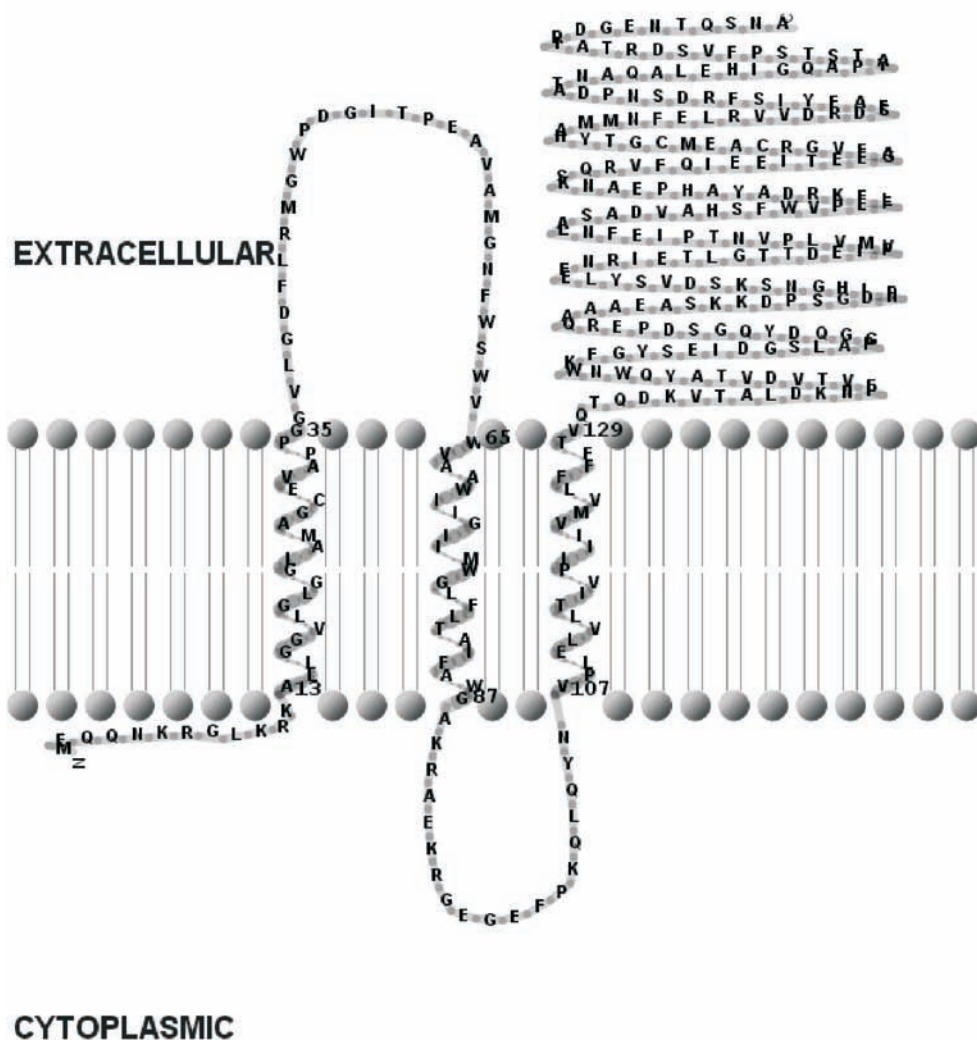



Cg2780 PROBABLE CYTOCHROME C OXIDASE POLYPEPTIDE SUBUNIT

MALDI 12TMH 65.0 kDa 21 Arg 10 Lys

|            |               |            |             |            |            |
|------------|---------------|------------|-------------|------------|------------|
| 10         | 20            | 30         | 40          | 50         | 60         |
| MTAVAPRV   | DG HVAPQRPEPT | GHARKGSKAW | LMMTTTTDHKQ | LGIMYIIMSF | SFFFLGGLMA |
| 70         | 80            | 90         | 100         | 110        | 120        |
| LLIRAELFTP | GLQFLSNEQF    | NQLFTMHGTV | MLLLYGTPIV  | WGFANYVLPL | QIGAPDVAFP |
| 130        | 140           | 150        | 160         | 170        | 180        |
| RLNAFGFWIT | TVGGVAMLTG    | FLTPGGAADF | GWTMYSPLSD  | AIHSPGLGSD | MWIVGVGATG |
| 190        | 200           | 210        | 220         | 230        | 240        |
| IGSVASAINM | LTTILCLRAP    | GMTMFRMPIF | TWNIFVSVL   | ALLIFPLLLA | AALGVLYDRK |
| 250        | 260           | 270        | 280         | 290        | 300        |
| LGGHLYDPAN | GGSLWQHFLF    | WFFGHPEVYV | LALPFFGIIVS | EIIPVFSRKP | MFGYVGLIFA |
| 310        | 320           | 330        | 340         | 350        | 360        |
| TLSIGALSMA | VWAHHMFVTG    | AVLLPFFSFM | TFLISVPTGV  | KFFNWVGTMW | KGHITWETPM |
| 370        | 380           | 390        | 400         | 410        | 420        |
| IWSVGFMATF | LFGGLTGIML    | ASPPLDFHLA | DSYFLIAHFH  | YTLFGTVVFA | SCAGVYFWFP |
| 430        | 440           | 450        | 460         | 470        | 480        |
| KMTGRMMDER | LGKIHFWLTF    | VGFHGTFLIQ | HWVGNMGMPR  | RYADYLDSDG | FTIYNQISTV |
| 490        | 500           | 510        | 520         | 530        | 540        |
| FSFLLGLSVI | PFIWNVFKSW    | RYGELVTVDD | PWGYGNSLEW  | ATSCPPPRHN | FASLPRIRSE |
| 550        | 560           | 570        | 580         | 590        |            |
| RPAFELHYPH | MIERMRAEAH    | TGHDDINAP  | ELGTAPALAS  | DSSR       |            |

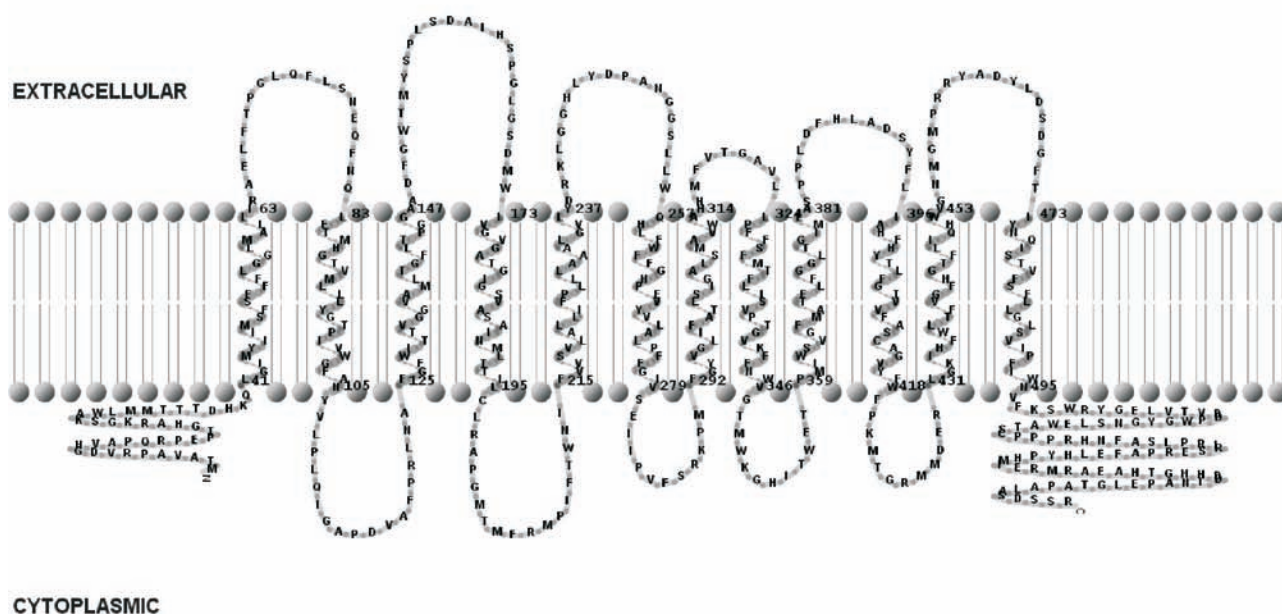

Cg2403 CYTOCHROME B, MEMBRANE PROTEIN

MALDI 9TMH 59.7 kDa 27 Arg 11 Lys

|                        |                    |                   |                   |                        |                          |
|------------------------|--------------------|-------------------|-------------------|------------------------|--------------------------|
| 10                     | 20                 | 30                | 40                | 50                     | 60                       |
| MSLATVGNL              | DSRYTMASGI         | RRQINKVFPT        | HWSFMLGEIA        | LYSFIVLLLT             | GVYLT <del>LF</del> FFDP |
| 70                     | 80                 | 90                | 100               | 110                    | 120                      |
| SITKVIYDGG             | YLPLNGVEMS         | RAYATALDIS        | FEVRGGLFIR        | QMHHWAALLF             | VVSMLVHMLR               |
| 130                    | 140                | 150               | 160               | 170                    | 180                      |
| IFFTGAFRRP             | REANWIIGVV         | LIILGMAEGF        | MGYSLPDDLL        | SGVGLRIMSA             | IIVGLPIIGT               |
| 190                    | 200                | 210               | 220               | 230                    | 240                      |
| WMHWLIFGGD             | FPSDLMLDRF         | YIAHVLIIPA        | <u>ILLGLIAAHL</u> | ALVWYQKHTQ             | FPGAGRTENN               |
| 250                    | 260                | 270               | 280               | 290                    | 300                      |
| VIGIRIMPLF             | AVKAVAFGLI         | VFGFLALLAG        | VTTINAIWNL        | GPYNPSQVSA             | <u>GSQPDVYMLW</u>        |
| 310                    | 320                | 330               | 340               | 350                    | 360                      |
| <u>TDGAARVMPA</u>      | <u>WELYLGN</u> YTI | PAVFWVAVML        | GILVLLVITY        | PFIERKFTGD             | DAHNNLLQRP               |
| 370                    | 380                | 390               | 400               | 410                    | 420                      |
| RDVPVRTSLG             | VMALV <u>FYILL</u> | TVSGGNDVYA        | MQFHVSLNAM        | TWIGRIGLIV             | GPAIAYFITY               |
| 430                    | 440                | 450               | 460               | 470                    | 480                      |
| RLCIGLQ <del>RSD</del> | REVLEHGIET         | <u>GIIKQMPNGA</u> | <u>FIEVHQPLGP</u> | VDDHGHP <del>IPL</del> | <u>PYAGA</u> AVPKQ       |
| 490                    | 500                | 510               | 520               | 530                    | 540                      |
| <u>MNQLGYAEVE</u>      | <u>TRGGFFG</u> PDP | <u>EDIRAKAKEI</u> | EHANHIEEAN        | TLRALNEANI             | ERDKNEGKN                |

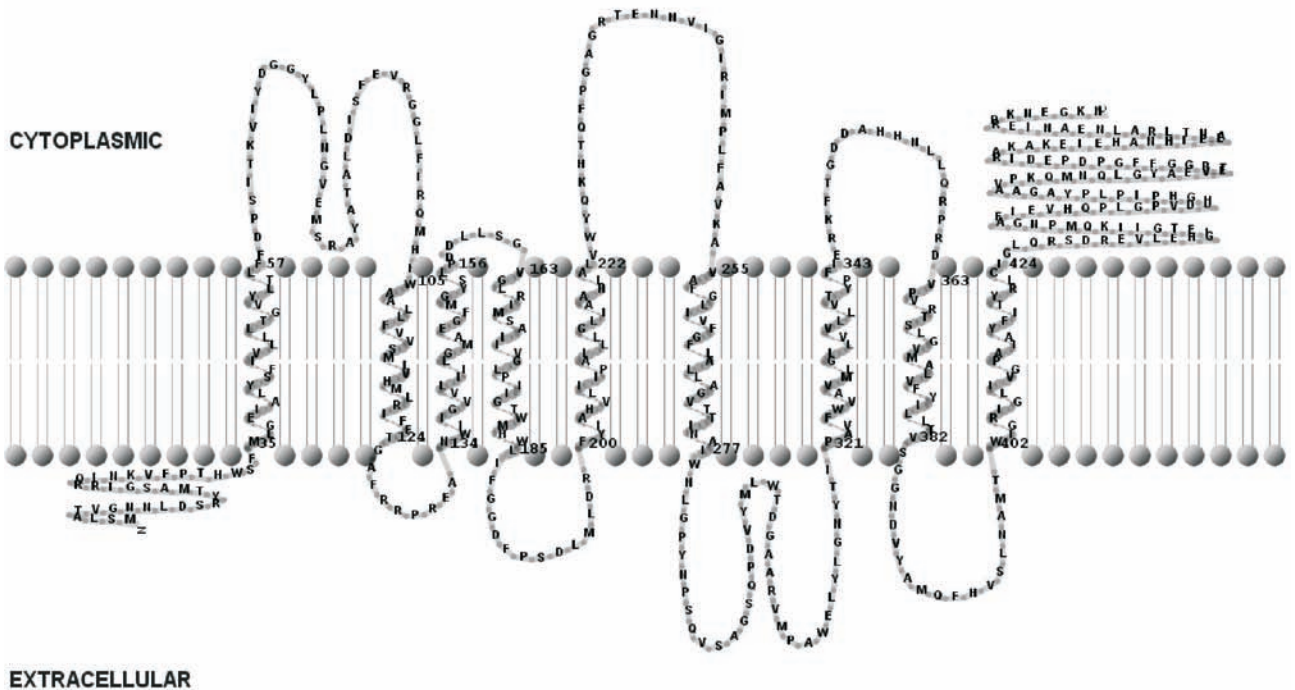





Cg2404 RIESKE IRON-SULFUR PROTEIN

MALDI 3TMH 45.1 kDa 22 Arg 15 Lys

|            |            |             |            |            |            |
|------------|------------|-------------|------------|------------|------------|
| 10         | 20         | 30          | 40         | 50         | 60         |
| MSNNNDKQYT | TQELNAMSNE | DLARLGTELD  | DVTIAYRKER | FPIANDPAEK | RAARAVTFWL |
| 70         | 80         | 90          | 100        | 110        | 120        |
| VLGIIGGLGF | LATYIFWPWE | YKAHGDEGLL  | AYTLYTPMLG | ITSGLCILSL | GFAVVLYVKK |
| 130        | 140        | 150         | 160        | 170        | 180        |
| FIPEEIAVQR | RHDGPSEEVD | RRTIVALLND  | SWQTSTLGRR | KLIMGLAGGG | AVLAGLTIIA |
| 190        | 200        | 210         | 220        | 230        | 240        |
| PMGGMIKNPW | NPKEGPMDVQ | GDGTLWTSKW  | TLVENDVKVY | LGRDTAAIAE | SHTDATGEHW |
| 250        | 260        | 270         | 280        | 290        | 300        |
| STTGVSRLVR | MRPEDLAAAS | METVFPPLPAE | MVNDGAEYDP | AKDVYEHQMH | SVHGPRNAVM |
| 310        | 320        | 330         | 340        | 350        | 360        |
| LIRLRTADAE | KVIEREQES  | FHYGDYYAYS  | KICTHIGCPT | SLYEAQTNRI | LCPCHQSQFD |
| 370        | 380        | 390         | 400        | 410        |            |
| ALHYGKPVFG | PAARALPQLP | ITVDEEGYLI  | AAGNFIEPLG | PAFWERKS   |            |

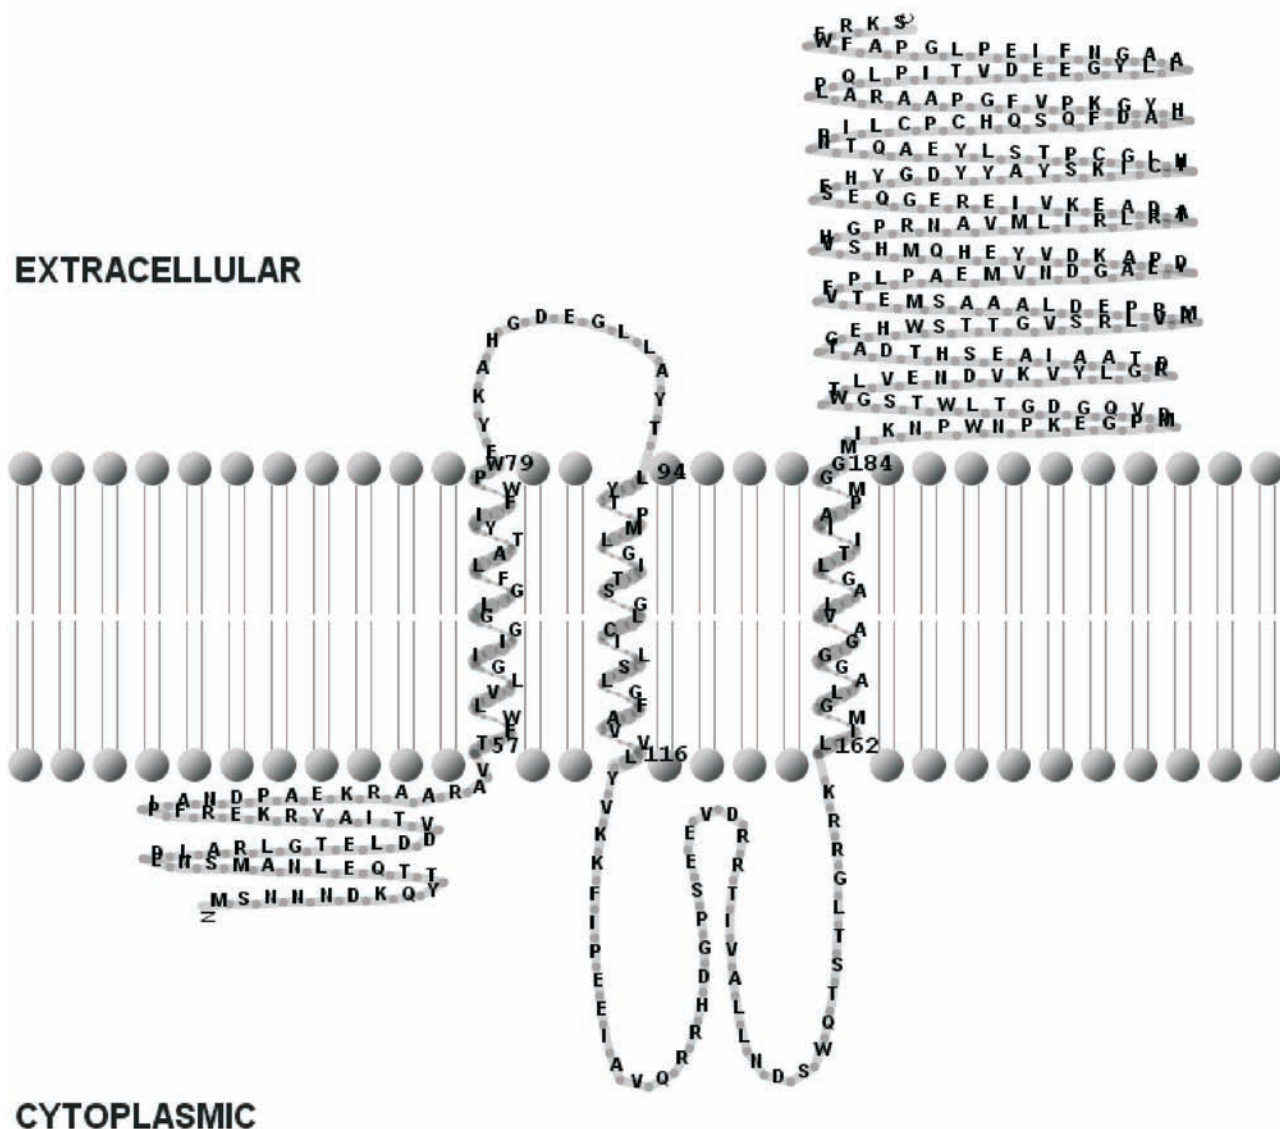

Cg2196 PUTATIVE SECRETED OR MEMBRANE PROTEIN

MALDI 2TMH 12.7 kDa 4 Arg 4 Lys

|            |            |            |            |            |            |
|------------|------------|------------|------------|------------|------------|
| 10         | 20         | 30         | 40         | 50         | 60         |
| MRKFRNTAIA | LVSAAAITLG | GVTAATAQED | ETPPAAETET | TSPSGSSGSS | WNDYNEEYEG |
| 70         | 80         | 90         | 100        | 110        | 120        |
| DQEGYGIDGF | GSSRDDSSEE | VPRWLETWVK | VFDALTITSV | LGLVVFVNVN | FLKYNGLIK  |

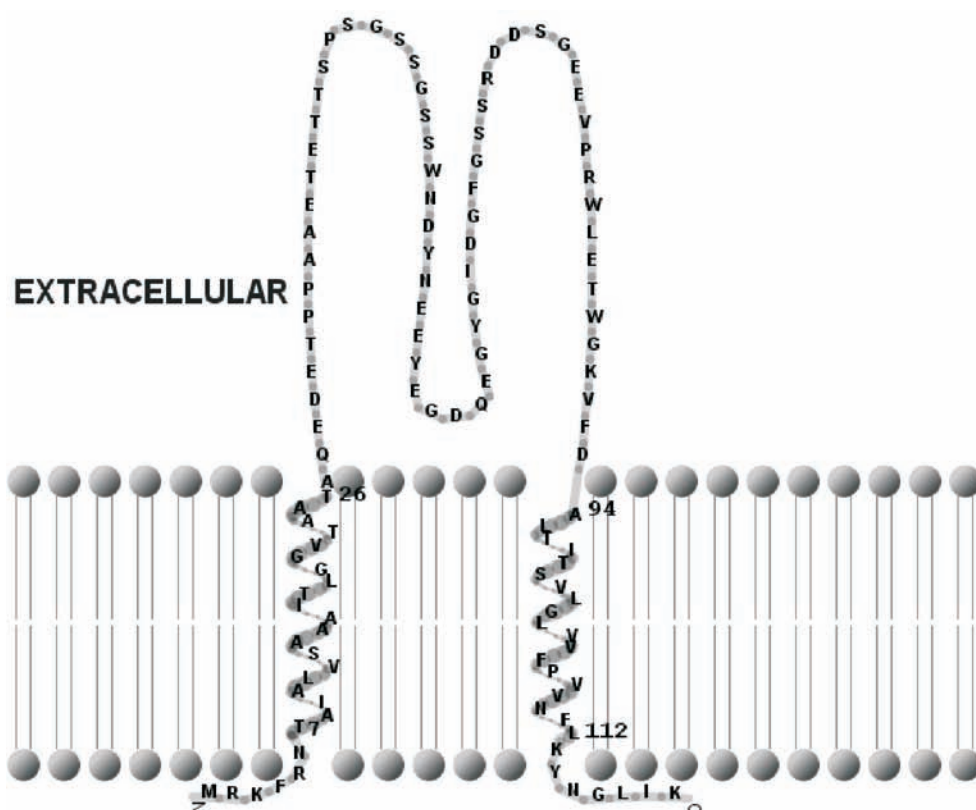

CYTOPLASMIC

Cg0756 PUTATIVE CARBON STARVATION PROTEIN A

MALDI 16TMH 81.0 kDa 29 Arg 22 Lys

|             |             |            |             |            |             |
|-------------|-------------|------------|-------------|------------|-------------|
| 10          | 20          | 30         | 40          | 50         | 60          |
| MTIKQTDNIN  | DDDLVYSNAT  | DLPVGVKKSP | KMSPTARVGL  | LVFGVIAAVG | WGAIAFSRGE  |
| 70          | 80          | 90         | 100         | 110        | 120         |
| TINSVWLVL   | AVGSYIIAFS  | FYARLIEYKV | VKPKDQRATP  | AEYVNDGKDY | VPTDRRVLFG  |
| 130         | 140         | 150        | 160         | 170        | 180         |
| HHFAAIAGAG  | PLVGPVMAAQ  | MGYLPGLTWI | ILGVIFAGAV  | QDYLVLVVST | RRRGRSLGQM  |
| 190         | 200         | 210        | 220         | 230        | 240         |
| VRDEMGTVGG  | AAGILATISI  | MIIIIAVLAL | IVVNALADSP  | WGVFSITMTI | PIALFMGVYL  |
| 250         | 260         | 270        | 280         | 290        | 300         |
| RYLRPGRVTE  | VSIIGVALLL  | LAIVAGGWVA | DTSWGVVEWFT | WSKTTLALAL | IGYGIMAAAIL |
| 310         | 320         | 330        | 340         | 350        | 360         |
| PVWLLAPRD   | YLSTFMKIGV  | IGLLAVGILF | ARPEVQMP    | TSFALEGNP  | VFSGSLFPFL  |
| 370         | 380         | 390        | 400         | 410        | 420         |
| FITIAACGALS | GFHALISSGT  | TPKLVEKESQ | MRMLGYGGML  | MESFVAMMAL | ITAVILDRHL  |
| 430         | 440         | 450        | 460         | 470        | 480         |
| YFSMNAPLAL  | TGGDPATAAE  | WVNSIGLTGA | DITPEQLSEA  | AESVGESTVI | SRTGGAPTLA  |
| 490         | 500         | 510        | 520         | 530        | 540         |
| FGMSEILSGF  | IGGAGMKAFW  | YHFAIMFEAL | FILTTVDAGT  | RVARFMMDT  | LGNVPGLRRE  |
| 550         | 560         | 570        | 580         | 590        | 600         |
| KDPSWTVGNW  | ISTVFVICALW | GAILLMGVTD | PLGGINVLFP  | LFGIANQLLA | AIALALVLVV  |
| 610         | 620         | 630        | 640         | 650        | 660         |
| VVKKGLYKWA  | WIPAVPLAWD  | LIVTMTASWQ | KIFHSDPAIG  | YWAQNANFRD | AKSQGLTEFG  |
| 670         | 680         | 690        | 700         | 710        | 720         |
| AAKSPEAIDA  | VIRNTMIQGI  | LSILFAVLVL | VVVGAAIAVC  | IKSIRARAAG | TPLETTEEPD  |
| 730         | 740         | 750        | 760         |            |             |
| TESEFFAPTG  | FLASSRDKEV  | QAMWDERYPG | GAPVSSGGH   |            |             |



Cg1429 PUTATIVE MEMBRANE PROTEIN

MALDI 5TMH 36.8 kDa 13 Arg 4 Lys

| 10                                | 20                            | 30                           | 40                           | 50                                | 60                                |
|-----------------------------------|-------------------------------|------------------------------|------------------------------|-----------------------------------|-----------------------------------|
| MTDNSRNSNQ                        | NFDQPDNLNDL                   | DDDSAIP <sup>YK</sup>        | GPSPSANS <sup>SSN</sup>      | ATERLG <sup>SVYD</sup>            | RTGRAAPQNI                        |
| 70                                | 80                            | 90                           | 100                          | 110                               | 120                               |
| PPASNA <sup>AETT</sup>            | <u>AFERPD<sup>NQSA</sup></u>  | <u>KP<sup>VASEAPT</sup></u>  | I <sup>T</sup> PASSGALA      | SDAP <sup>TSYVQA</sup>            | QPSQQ <sup>QTPQQ</sup>            |
| 130                               | 140                           | 150                          | 160                          | 170                               | 180                               |
| <u>VPPAP<sup>PTQVT</sup></u>      | <u>RQISR<sup>PPEEPG</sup></u> | <u>YQPE<sup>PSYSEP</sup></u> | <u>YTDS<sup>DFAPAG</sup></u> | AAAA <sup>AAVAP</sup>             | PMIAEQ <sup>PQIV</sup>            |
| 190                               | 200                           | 210                          | 220                          | 230                               | 240                               |
| EDARR <sup>GTLD<sup>F</sup></sup> | GLLI <sup>IRAVIG</sup>        | VYLIV <sup>RGVFT</sup>       | FFTL <sup>GGSAGL</sup>       | AGLEA <sup>E<sup>FAGY</sup></sup> | QWPEI <sup>LAILL</sup>            |
| 250                               | 260                           | 270                          | 280                          | 290                               | 300                               |
| PSIELA <sup>AGVF</sup>            | LLLGL <sup>MTPVA</sup>        | AAVAT <sup>VATSF</sup>       | TTLHQ <sup>VNTHE</sup>       | GGWGE <sup>LSEPL</sup>            | MLALI <sup>LTI<sup>VV</sup></sup> |
| 310                               | 320                           | 330                          | 340                          | 350                               | 360                               |
| VGLQ <sup>FTGPGK</sup>            | ISLDS <sup>GRGWA</sup>        | KRPL <sup>VSSWIF</sup>       | VVIGI <sup>AAAVL</sup>       | LWWF <sup>GAGVNP</sup>            | IA                                |

EXTRACELLULAR

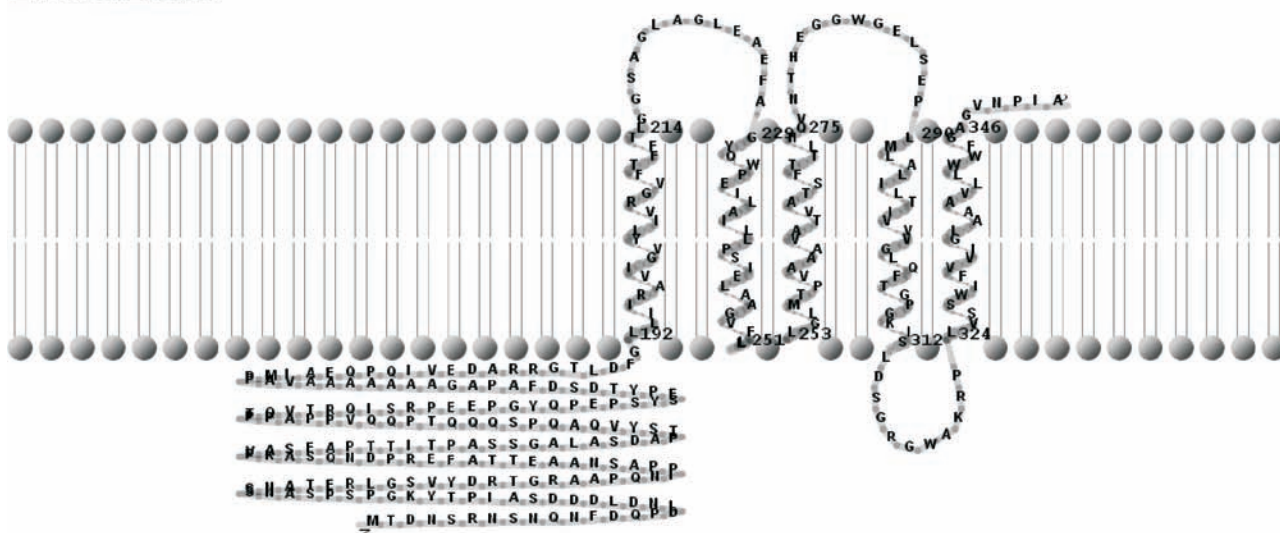

CYTOPLASMIC

Cg2211 PUTATIVE MEMBRANE PROTEIN

MALDI 2TMH 16.5 kDa 7 Arg 5 Lys

|            |            |            |            |            |            |
|------------|------------|------------|------------|------------|------------|
| 10         | 20         | 30         | 40         | 50         | 60         |
| MAGSSHTIEP | EIYRGVSTLD | EPSAAWGWHG | LKRNTIQLAG | WISVLFMLGY | NFGNHKGHVE |
| 70         | 80         | 90         | 100        | 110        | 120        |
| TIWLLVITAL | LVIGLLIHLF | EPKLSQVRTI | TSRNKPVGHV | EPDWTYDQAT | LTGTWGNLTD |
| 130        | 140        | 150        |            |            |            |
| SQLRSVNIEP | SRVAHLRAAD | SAKELDN    |            |            |            |

CYTOPLASMIC

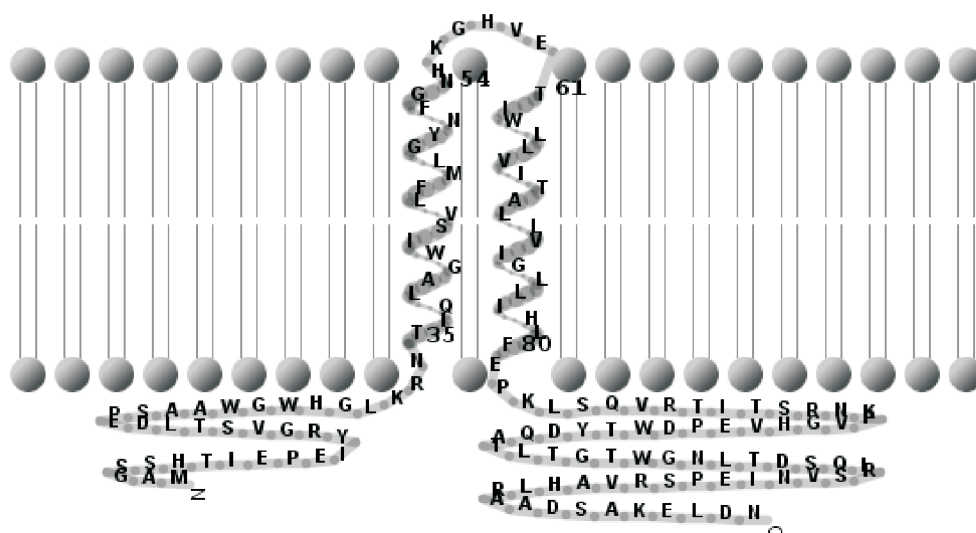

EXTRACELLULAR

Cg1685 SEC-INDEPENDENT PROTEIN SECRETION PATHWAY COMPONENT

MALDI 1TMH 12.0 kDa 5 Arg 5 Lys

|            |            |            |            |            |            |
|------------|------------|------------|------------|------------|------------|
| 10         | 20         | 30         | 40         | 50         | 60         |
| MSLGPWEIGI | IVLLIIVLFG | AKKLPDAARS | IGRSMRIFKS | EVKEMNKDGD | TPEQQQQPQQ |
| 70         | 80         | 90         | 100        | 110        |            |
| QIAPNQIEAP | QPNFEQHYQG | QQVQQPQNPQ | TPDYRQNYED | PNRTS      |            |

CYTOPLASMIC

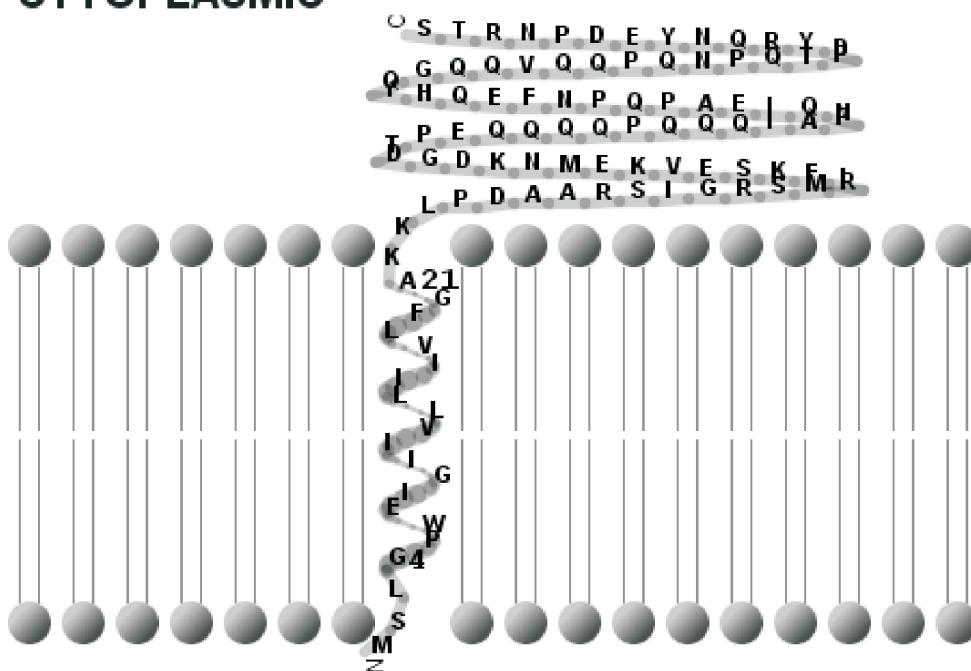

EXTRACELLULAR

Cg2405 CYTOCHROME C1

MALDI 2TMH 31.1 kDa 16 Arg 13 Lys

|            |            |            |            |            |            |
|------------|------------|------------|------------|------------|------------|
| 10         | 20         | 30         | 40         | 50         | 60         |
| METNPQTPEG | NSMAKPSAKK | VKNRRKVRRT | VAGALALTIG | LSGAGILATA | ITPDAQVATA |
| 70         | 80         | 90         | 100        | 110        | 120        |
| QRDDQALISE | GKDLYDVACI | TCHGVNLQGV | EDRGPSLVGV | GEGAVYFQVH | SGRMPILRNE |
| 130        | 140        | 150        | 160        | 170        | 180        |
| AQAERKAPRY | TEAQTIAIAA | YVAANGGGPG | LVYNEDGTLA | MEELRGENYD | GQITSADVAR |
| 190        | 200        | 210        | 220        | 230        | 240        |
| GGDLFRLNCA | SCHNFTGRGG | ALSSGKYAPN | LDAANEQEIY | QAMLTGPQNM | PKFSDRQLSA |
| 250        | 260        | 270        | 280        | 290        | 300        |
| DEKKDIIAFI | KSTKETPSPG | GYSLGSLGPV | AEGLFMWVFG | ILVLVAAAMW | IGSRS      |

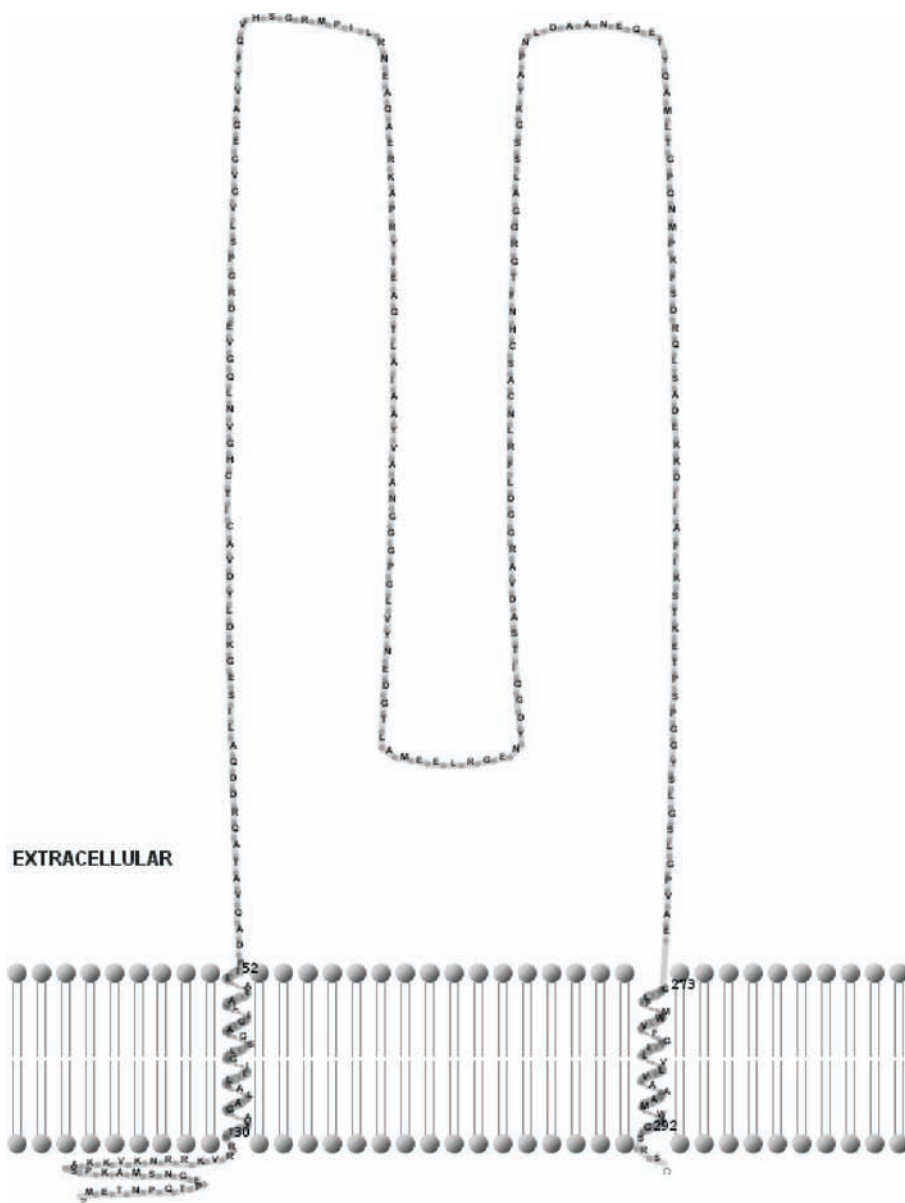



# Cg1001 LARGE CONDUCTANCE MECHANOSENSITIVE CHANNEL

MALDI 2TMH 14.5 kDa 6 Arg 5 Lys

|                    |              |            |            |            |            |
|--------------------|--------------|------------|------------|------------|------------|
| 10                 | 20           | 30         | 40         | 50         | 60         |
| MLK <u>GFRDFVL</u> | RGNVIELAVA   | VVIGTAFTAI | VTAFSESIIN | PLIASIGSTE | VEGLGFHIRA |
| 70                 | 80           | 90         | 100        | 110        | 120        |
| GNAATFVDFG         | AVITAAINFL   | IAAIVYFVL  | VAPMKNLSET | LAKRKGVEED | ETPASIEAEL |
| 130                | 140          |            |            |            |            |
| <u>LTEIRDLLQE</u>  | <u>QKRLQ</u> |            |            |            |            |

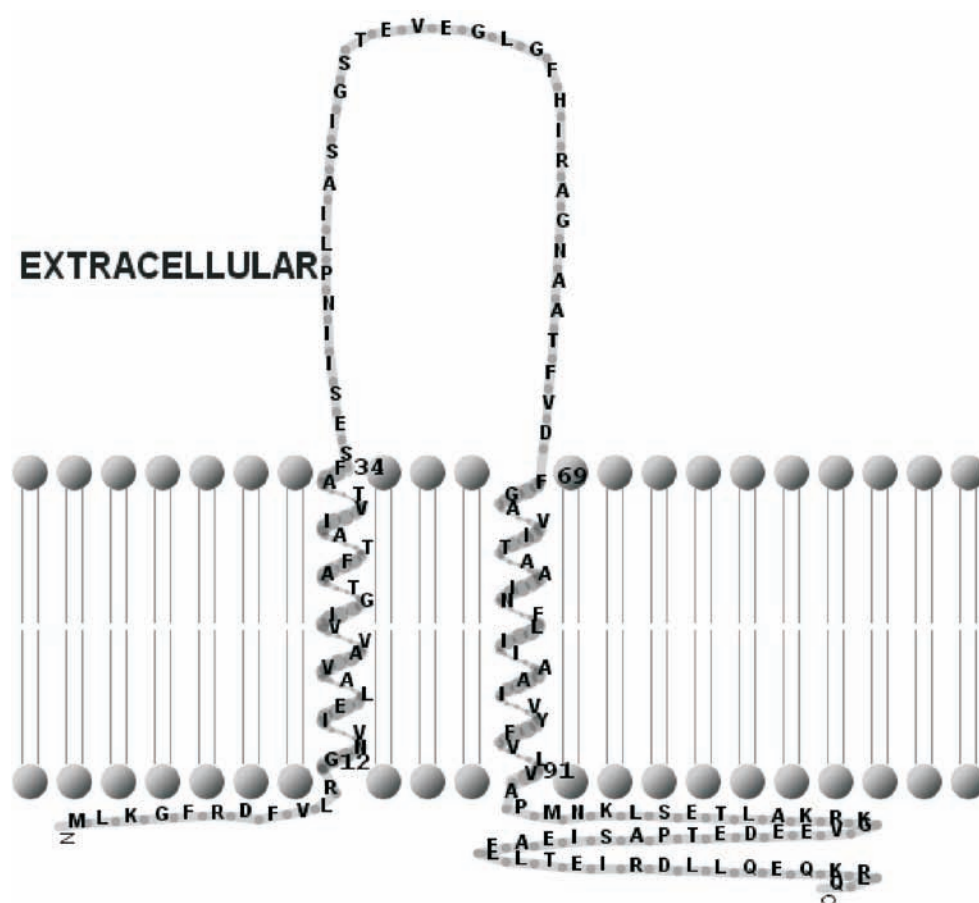

Cg0953 Na<sup>+</sup>/PROLINE, Na<sup>+</sup>/PANTOTHENATE SYMPORTER

MALDI 13TMH 57.2 kDa 13 Arg 15 Lys

|            |            |            |            |            |            |
|------------|------------|------------|------------|------------|------------|
| 10         | 20         | 30         | 40         | 50         | 60         |
| MNSTILLAQD | AVSEGVGNPI | LNISVFVFFI | IVTMTVVLRV | GKSTSESTDF | YTGGASFSGT |
| 70         | 80         | 90         | 100        | 110        | 120        |
| QNGLAIAQDY | LSAASFLGIV | GAISLNGYDG | FLYSIGFFVA | WLVALLLVAE | PLRNVGRFTM |
| 130        | 140        | 150        | 160        | 170        | 180        |
| ADVLSFRLRQ | KPVRVAAACG | TLAVTLFYLI | AQMAGAGSLV | SVLLDIHEFK | WQAVVVGIVG |
| 190        | 200        | 210        | 220        | 230        | 240        |
| IVMIAVLLG  | GMKGTTYVQM | IKAVLLVGGV | AIMTVLTFVK | VSGGLTTLN  | DAVEKHAASD |
| 250        | 260        | 270        | 280        | 290        | 300        |
| YAATKGYDPT | QILEPGLQYG | ATLTTQLDFI | SLALALCLGT | AGLPHVLMRF | YTVPTAKEAR |
| 310        | 320        | 330        | 340        | 350        | 360        |
| KSVTWAIVLI | GAFYLMTLVL | GYGAAALVGP | DRVIAAPGAA | NAAAPLLAFE | LGGSIFMALI |
| 370        | 380        | 390        | 400        | 410        | 420        |
| SAVAFATVLA | VVAGLAITAS | AAVGHDIYNA | VIRNGQSTEA | EQVRVSRITV | VVIGLISIVL |
| 430        | 440        | 450        | 460        | 470        | 480        |
| GILAMTQNV  | FLVALAFAVA | ASANLPTILY | SLYWKKFNTT | GAVAAIYTGL | ISALLIFLS  |
| 490        | 500        | 510        | 520        | 530        | 540        |
| PAVSGNDSAM | VPADWAIFP  | LKNPGLVSIP | LAFIAGWIGT | LVGKPDNMDD | LAAEMEVRSL |
| 550        | 560        |            |            |            |            |
| TGVGVEKAVD | H          |            |            |            |            |

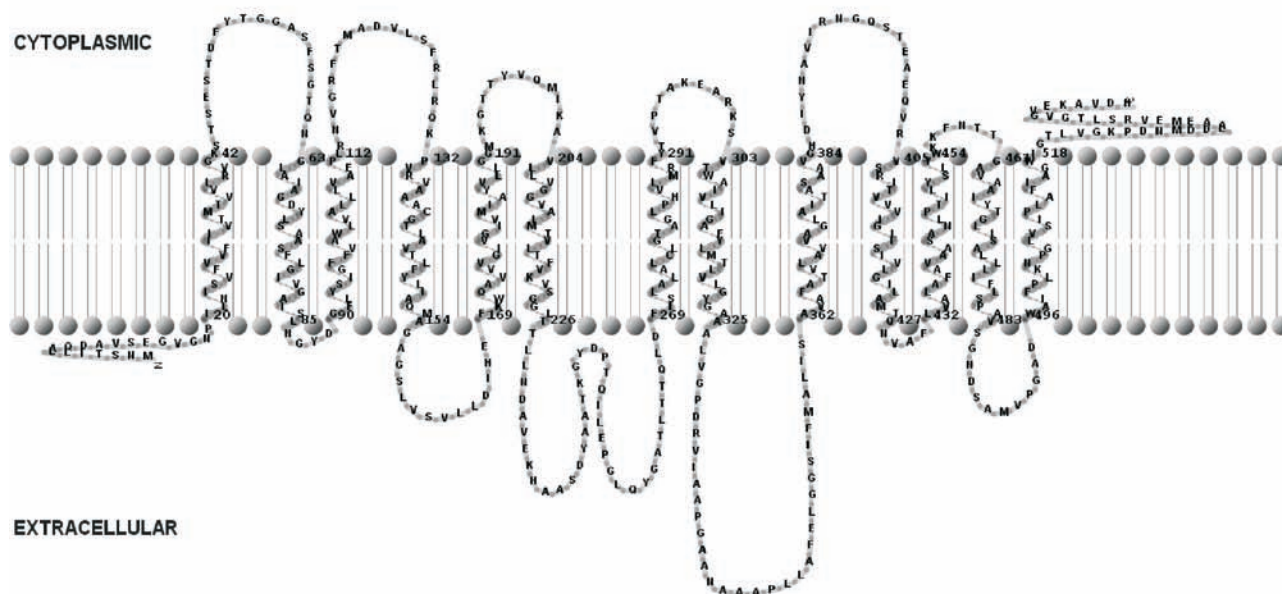

P02945 BACTERIORHODOPSIN

ESI 7TMH 26.8 kDa 7 Arg 7 Lys

|            |            |             |            |            |            |
|------------|------------|-------------|------------|------------|------------|
| 10         | 20         | 30          | 40         | 50         | 60         |
| QAQITGRPEW | IWLALGTALM | GLGTLYFLVK  | GMGVSDPDAK | KFYAITTLVP | AIAFTMYLSM |
| 70         | 80         | 90          | 100        | 110        | 120        |
| LLGYGLTMVP | FGGEQNPIYW | ARYADWLFTT  | PLLLLDLALL | VDADQGTILA | LVGADGIMIG |
| 130        | 140        | 150         | 160        | 170        | 180        |
| TGLVGALTKV | YSYRFVWVAI | STAAMLYILY  | VLFFGFTSKA | ESMRPEVAST | FKVLRNVTVV |
| 190        | 200        | 210         | 220        | 230        | 240        |
| LWSAYPVVWL | IGSEGAGIVP | LNIEITLLFMV | LDVSAKVGFG | LILLRSRAIF | GEAEAPEPSA |
| 250        | GDGAAATSD  |             |            |            |            |

CYTOPLASMIC

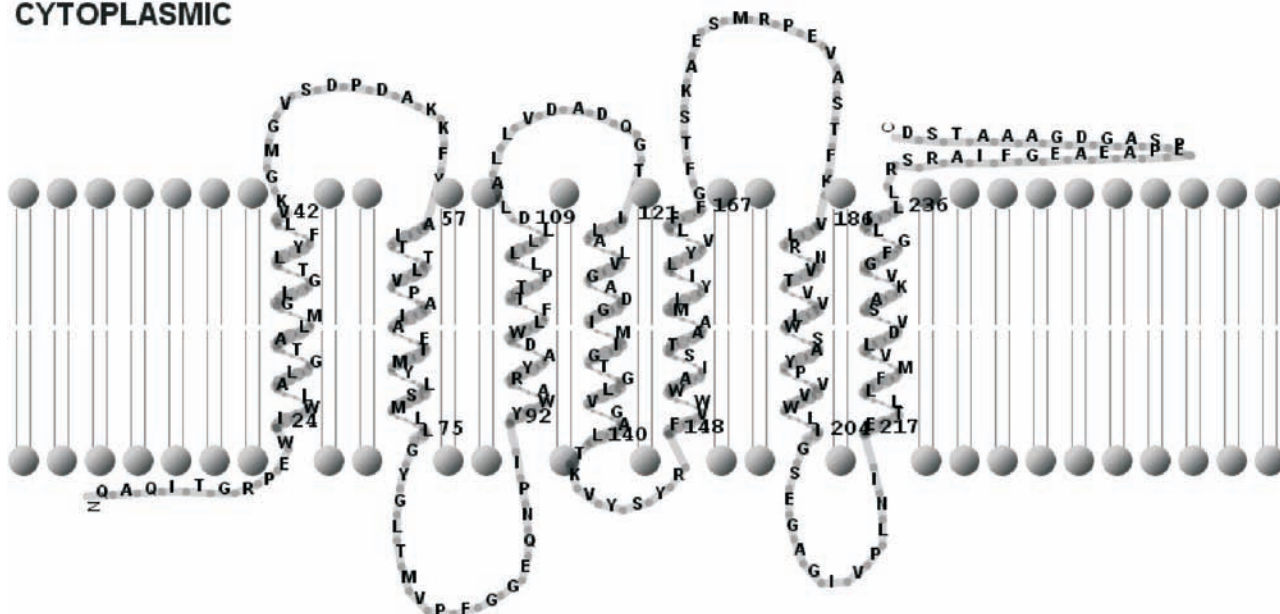

EXTRACELLULAR

P02945 BACTERIORHODOPSIN

MALDI 7TMH 26.8 kDa 7 Arg 7 Lys

|            |            |            |            |            |            |
|------------|------------|------------|------------|------------|------------|
| 10         | 20         | 30         | 40         | 50         | 60         |
| QAQITGRPEW | IWLALGTALM | GLGTLYFLVK | GMGVSDPDAK | KFYAITTLVP | AIAFTMYLSM |
| 70         | 80         | 90         | 100        | 110        | 120        |
| LLGYGLTMVP | FGGEQNPIYW | ARYADWLFTT | PLLLLDLALL | VDADQGTILA | LVGADGIMIG |
| 130        | 140        | 150        | 160        | 170        | 180        |
| TGLVGALTKV | YSYRFVWWAI | STAAMLYILY | VLFFGFSTKA | ESMRPEVAST | FKVLRNVTVV |
| 190        | 200        | 210        | 220        | 230        | 240        |
| LWSAYPVVWL | IGSEGAGIVP | LNIETLLFMV | LDVSAKVGFG | LILLRSRAIF | GEAEAPEPSA |
| 250        | GDGAAATSD  |            |            |            |            |

CYTOPLASMIC

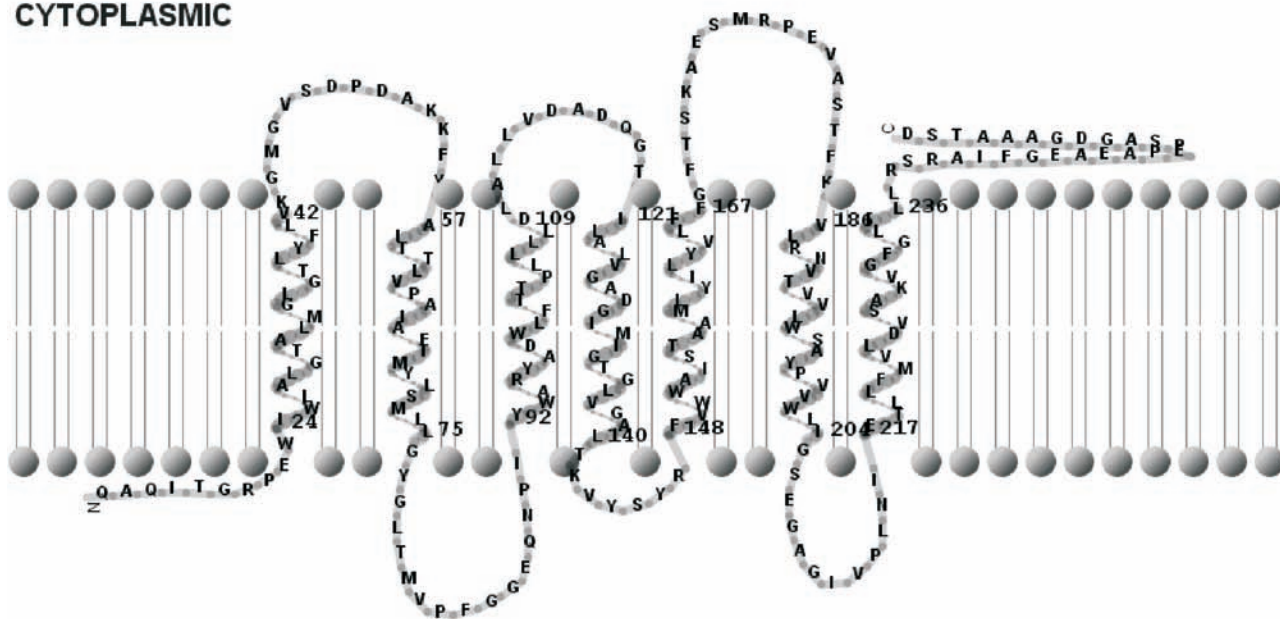

EXTRACELLULAR
